# Supplementary material
Source: PubMed Central journal article supplement (PMC3423464)
Supplement: supp_47.2.234_Leikauf_ODS_suppl_fig_1-5.pdf [file supp_47.2.234_Leikauf_ODS_suppl_fig_1-5.pdf]

Supplemental Figure S1

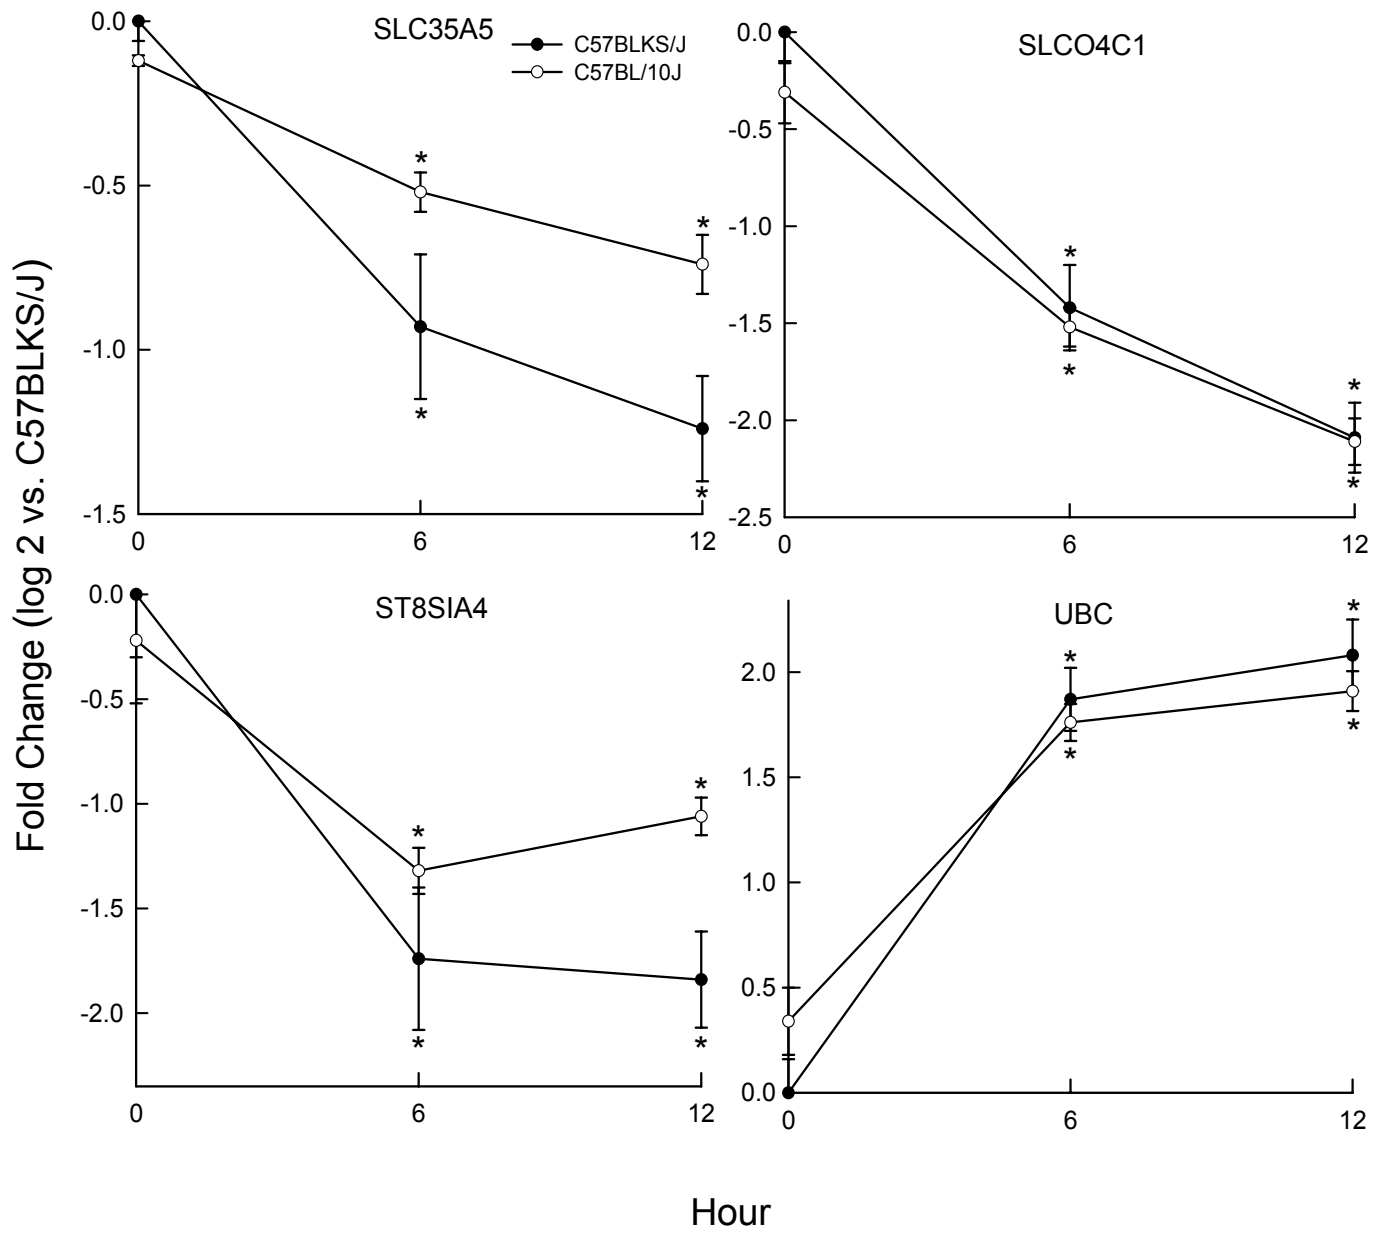

# Supplemental Figure S2

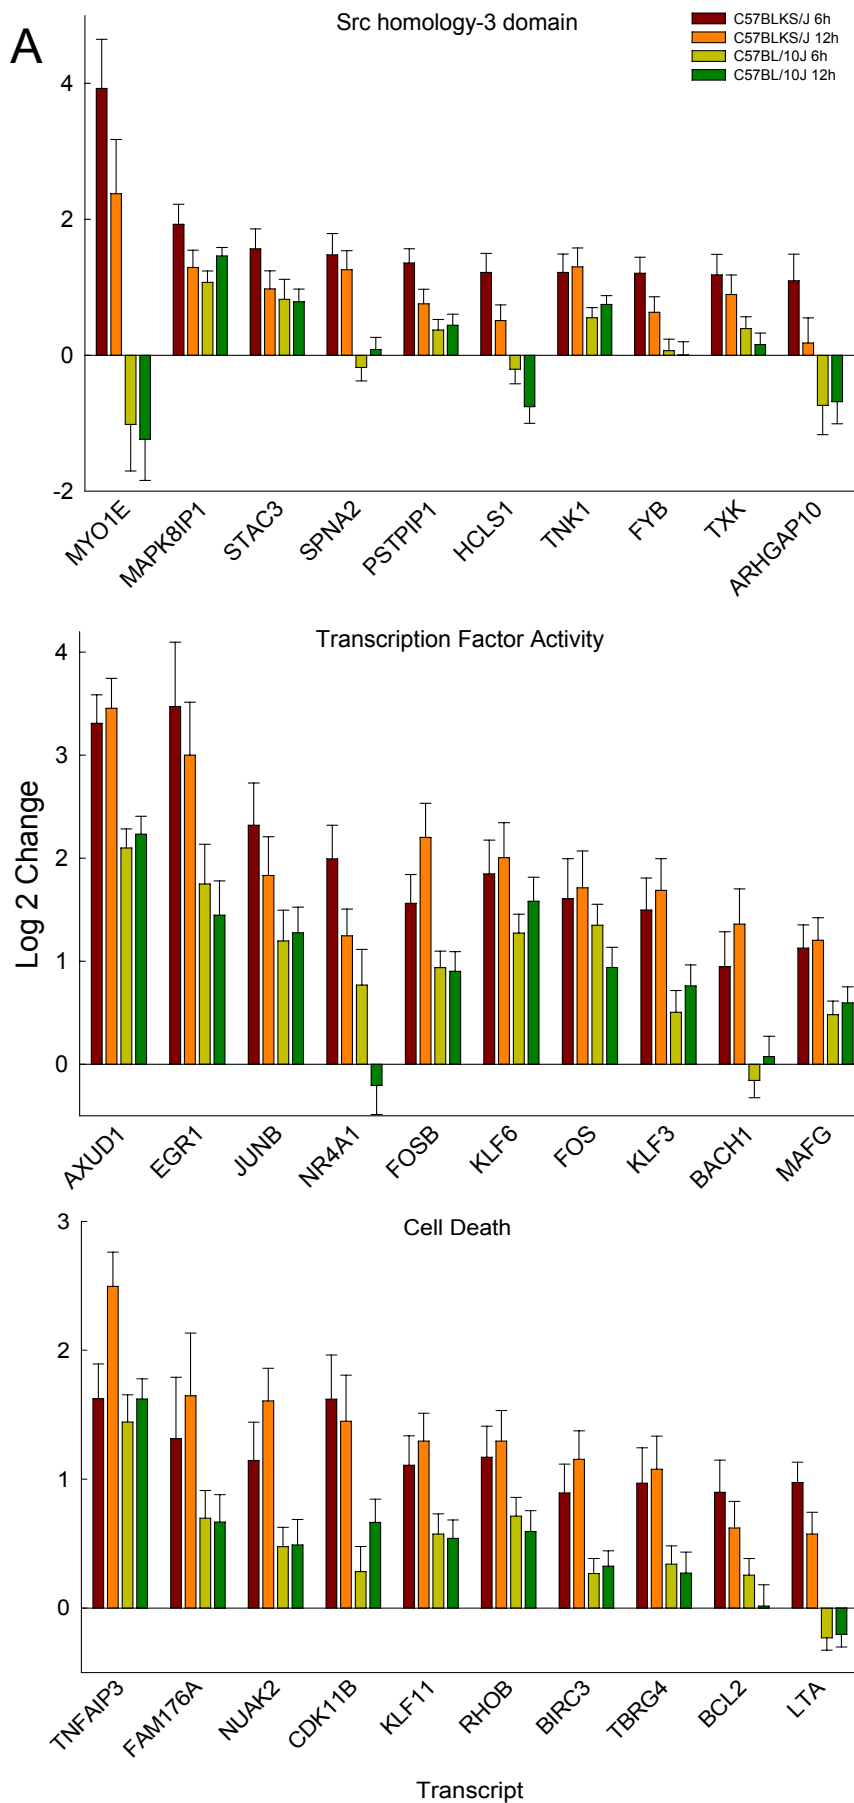

# Supplemental Figure S2

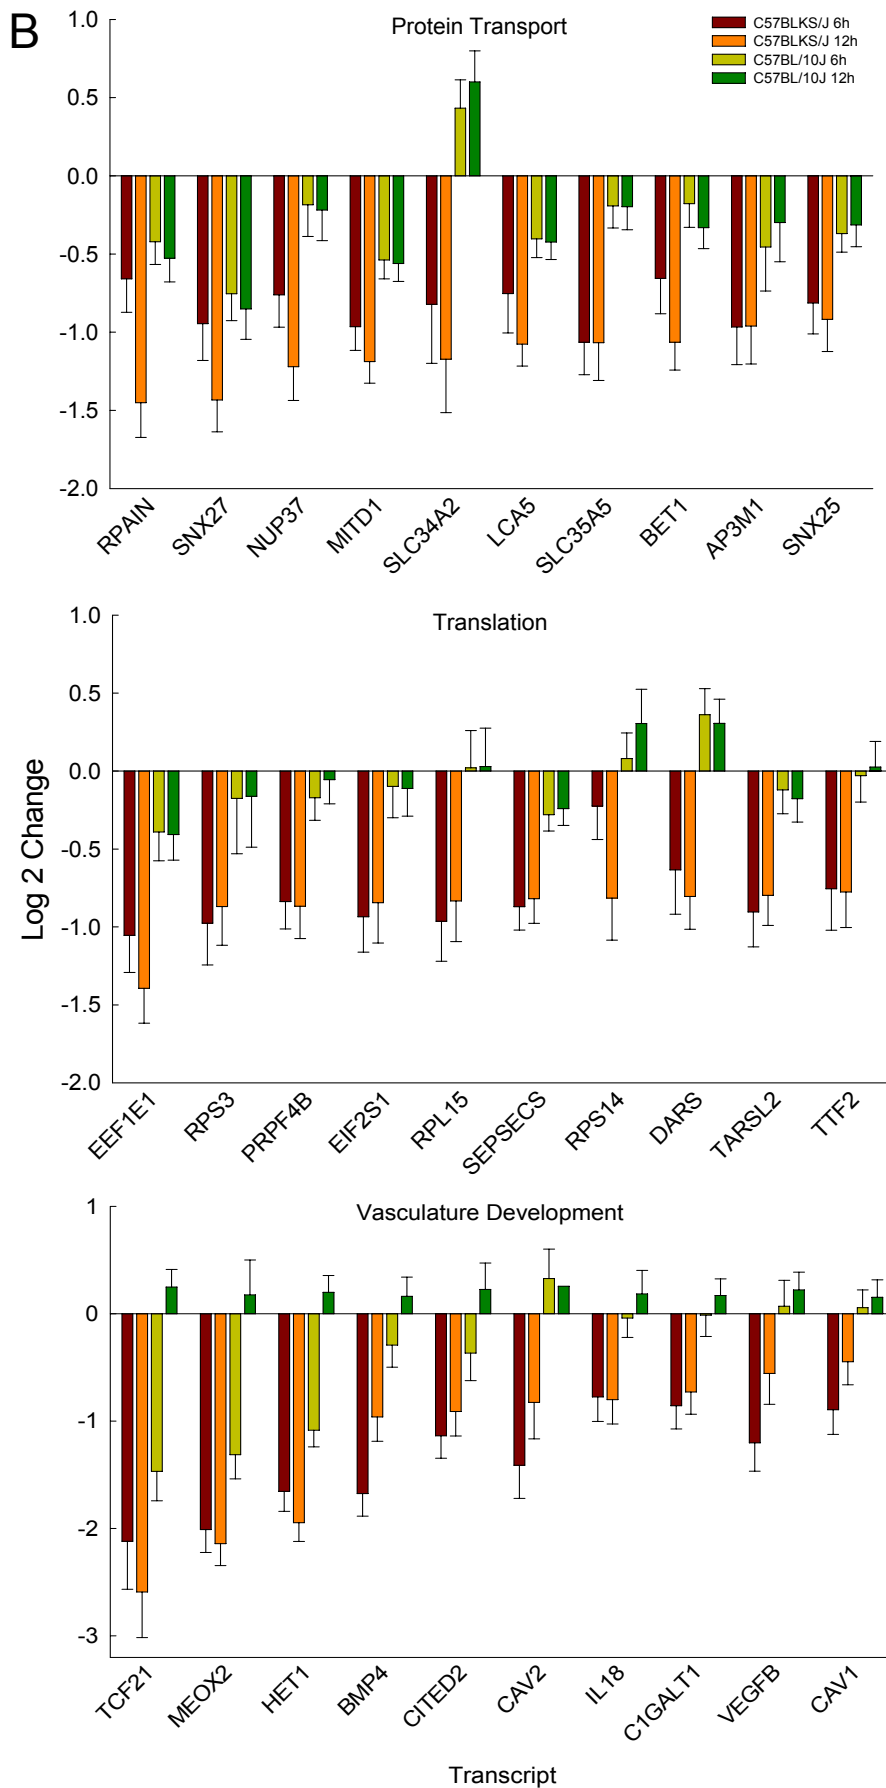

# Supplemental Figure S3

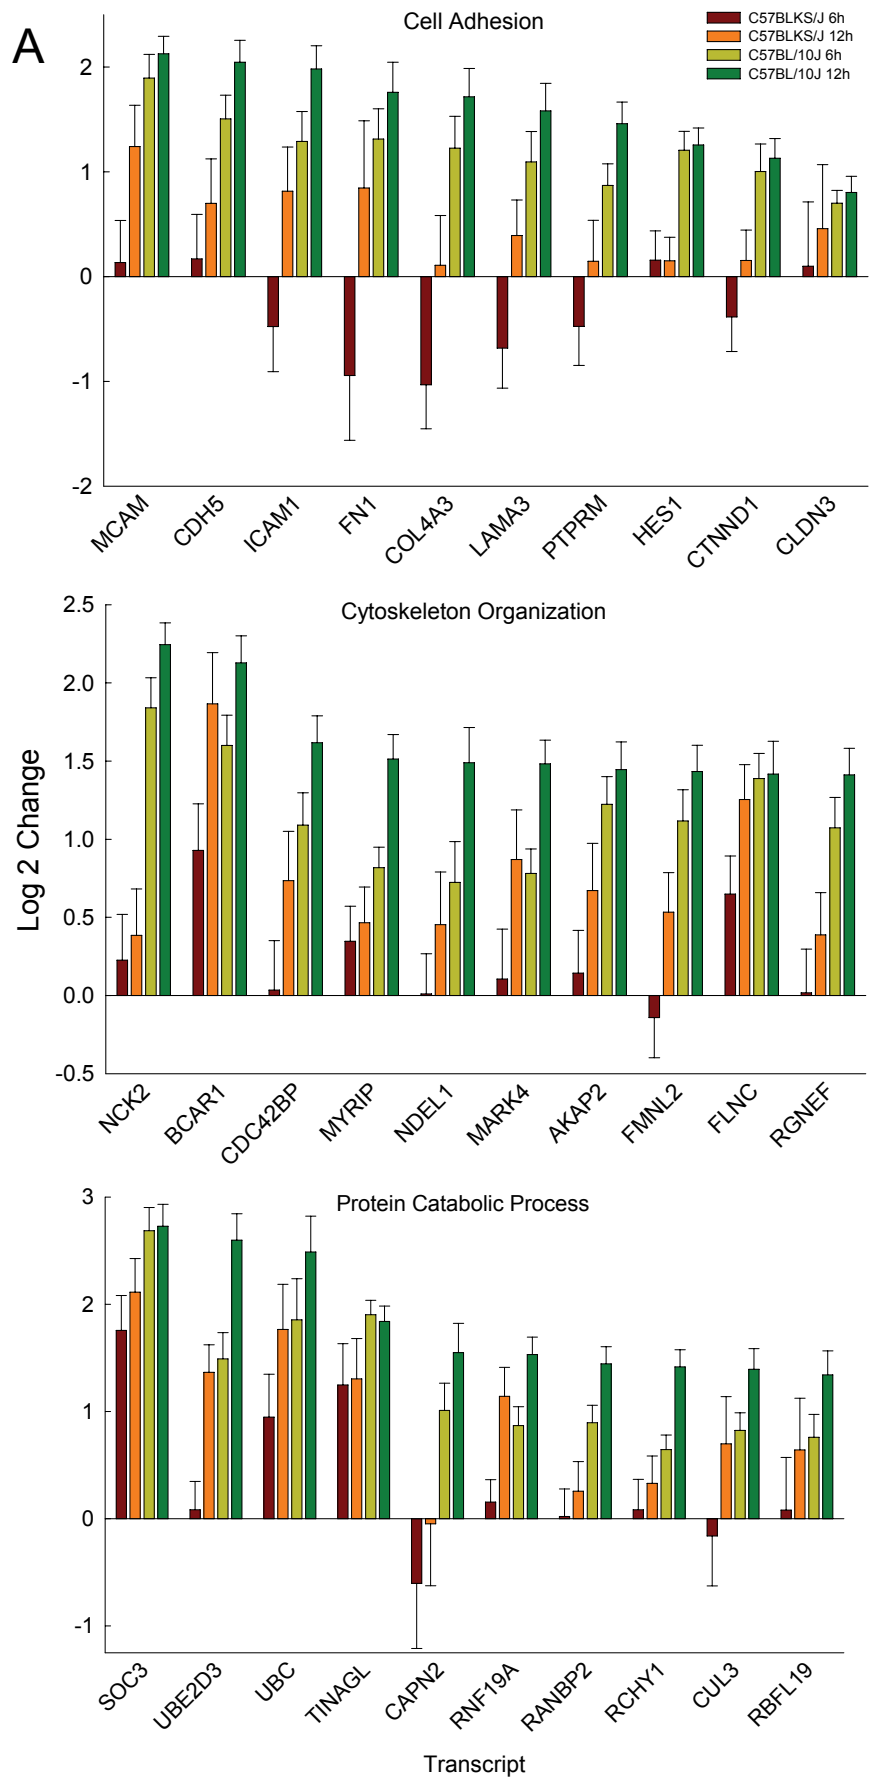

# Supplemental Figure S3

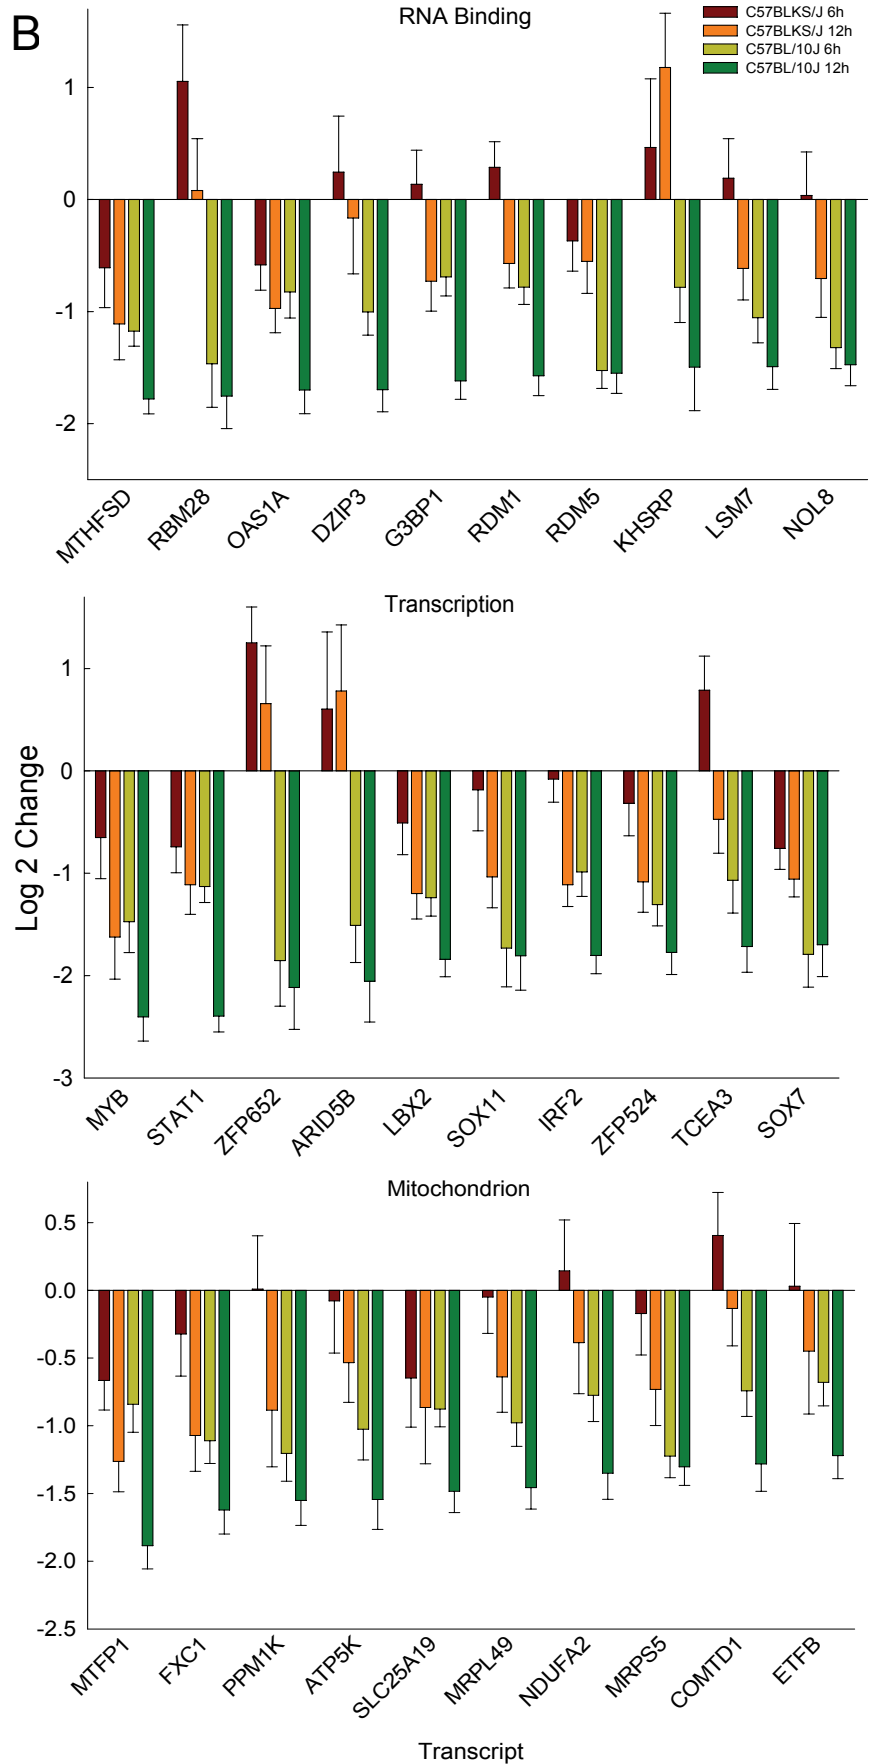

Supplemental Figure S4

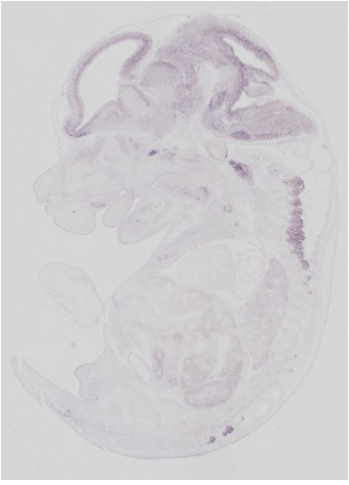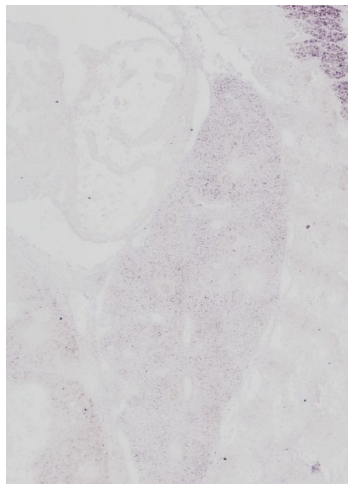

AACS C57BL/6

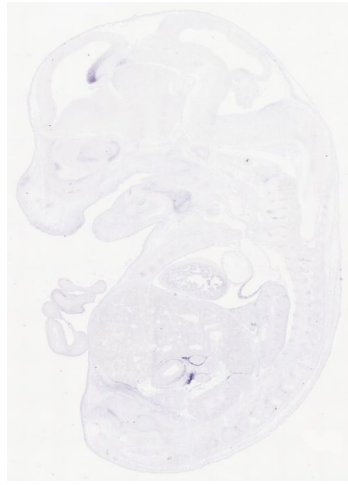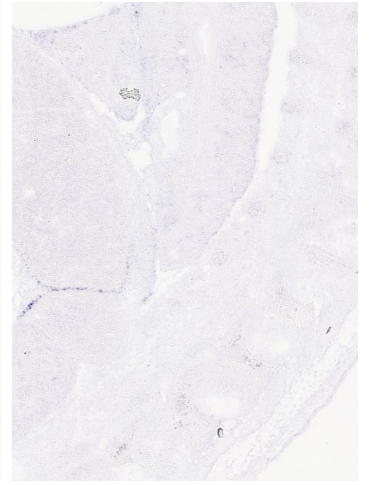

ADAMTS19 C57BL/6

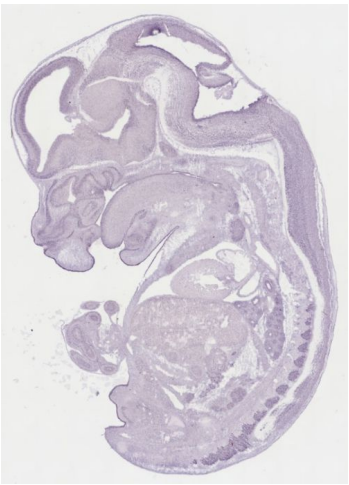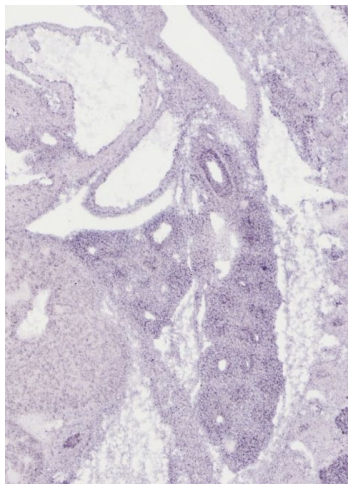

BCKDHB C57BL/6

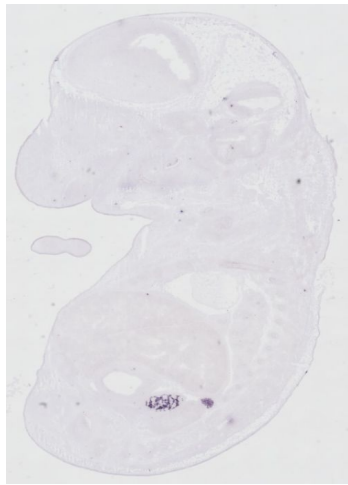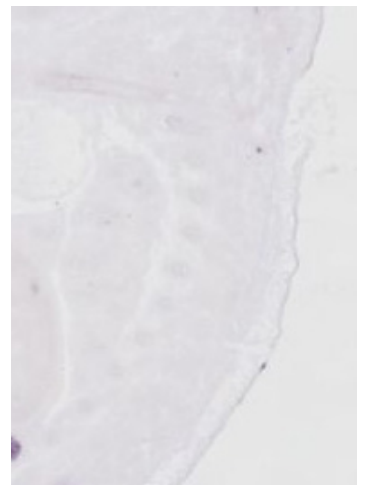

CYP11A1 C57BL/6

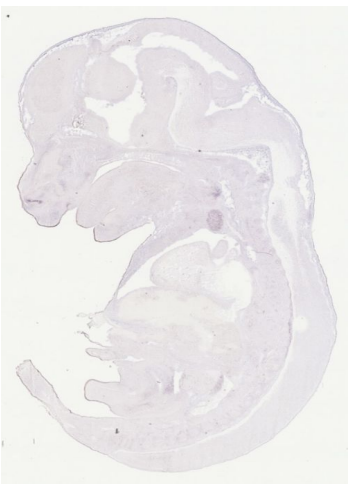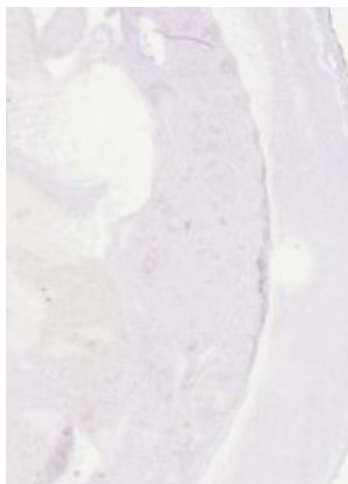

DOCK10 C57BL/6

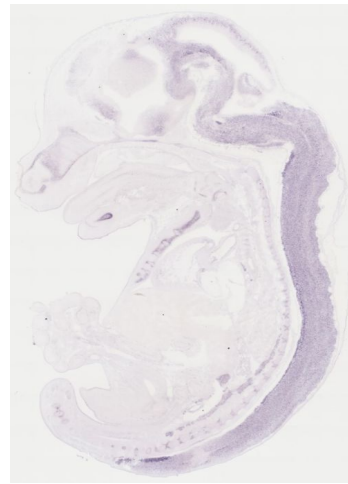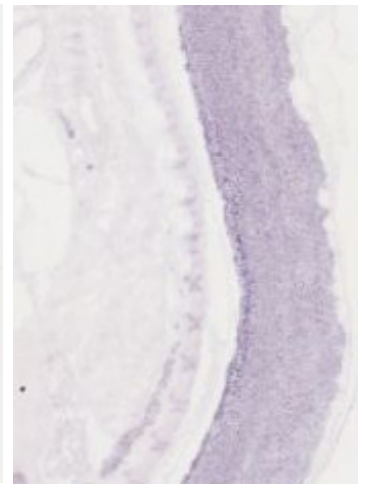

FRY C57BL/6

Supplemental Figure S4

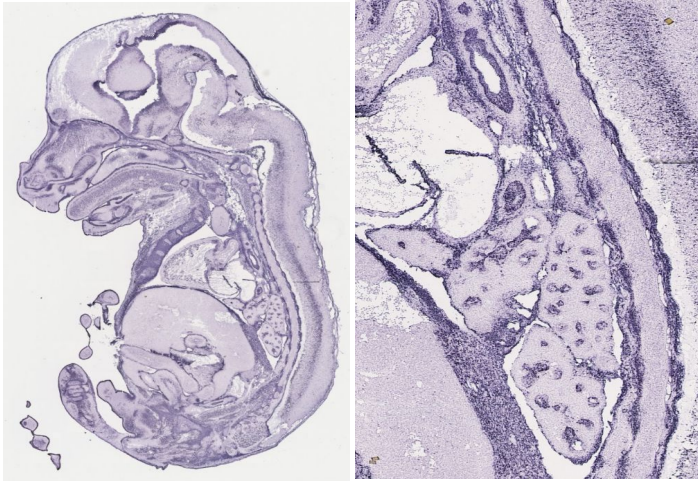

IGFBP5 C57BL/6

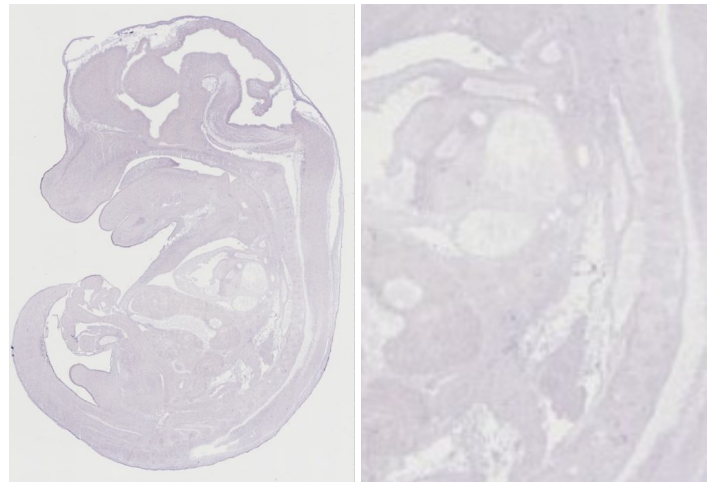

IKBKAP C57BL/6

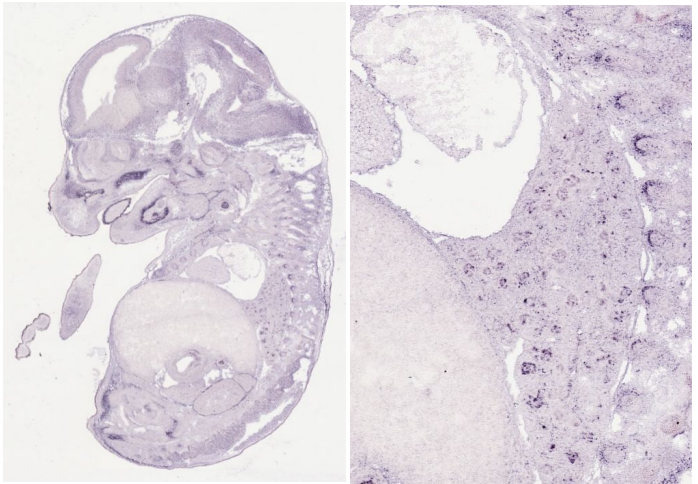

KLF4 C57BL/6

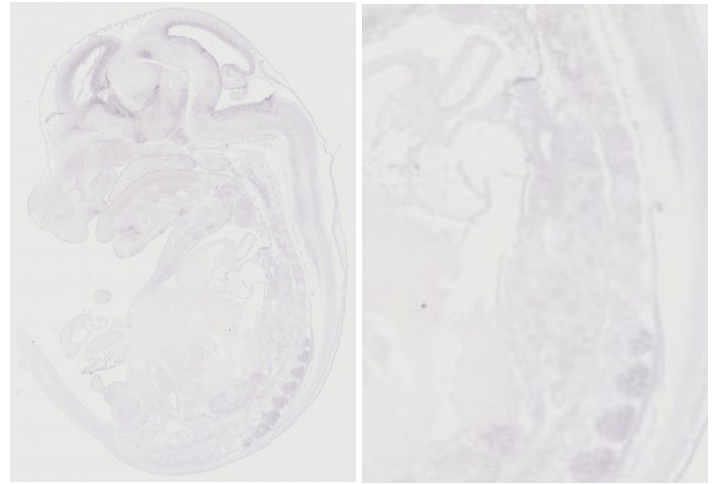

NCOR2 C57BL/6

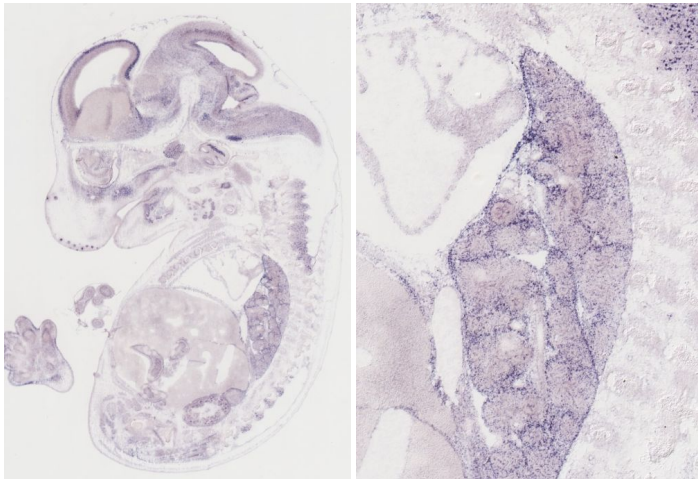

NEO1 NMRI

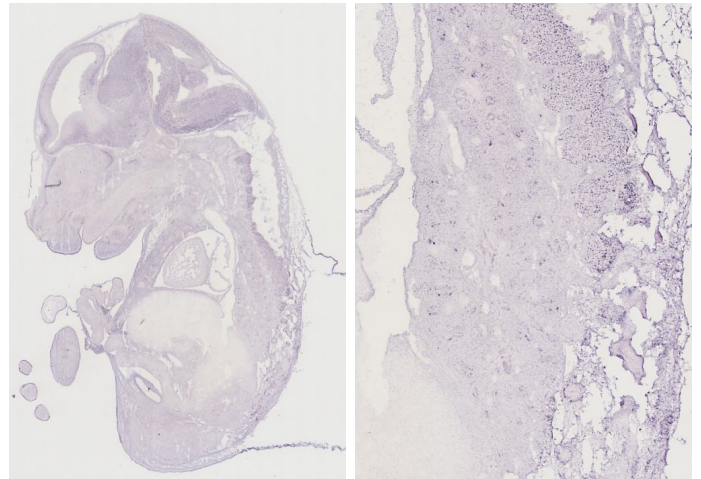

PACS1 C57BL/6

Supplemental Figure S4

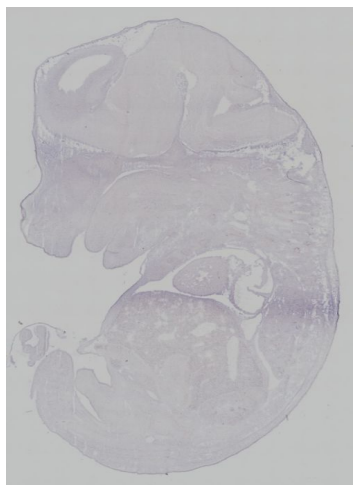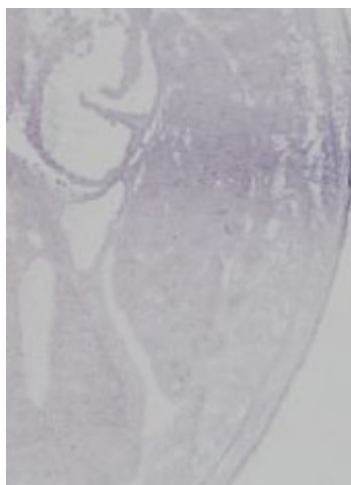

PML C57BL/6

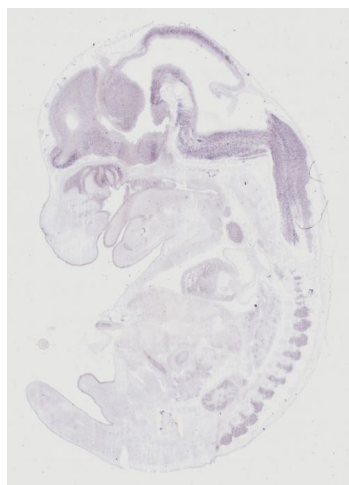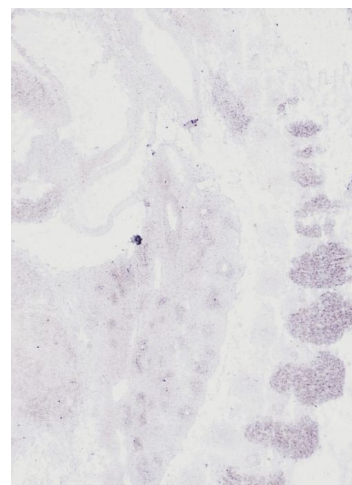

PPIP5K2 C57BL/6

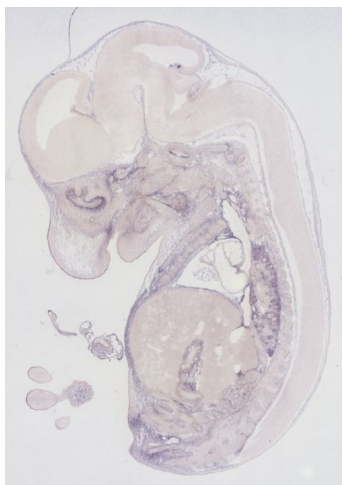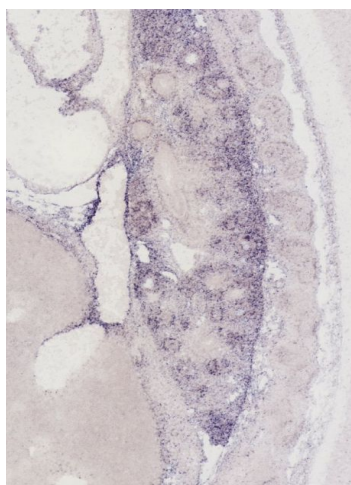

ROR1 NMRI

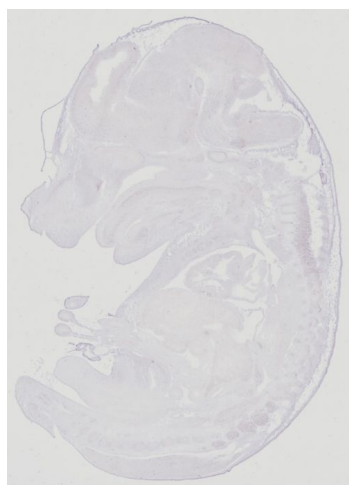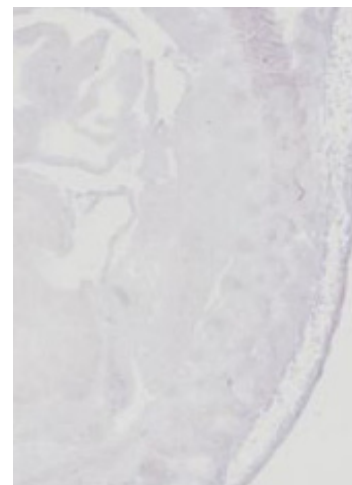

SACS C57BL/6

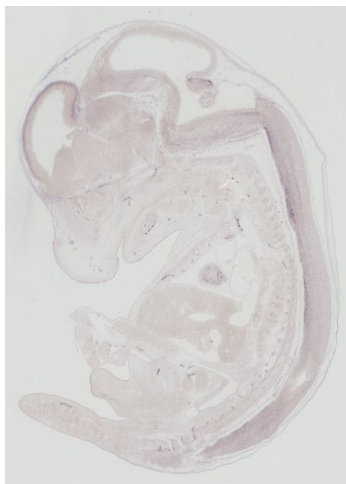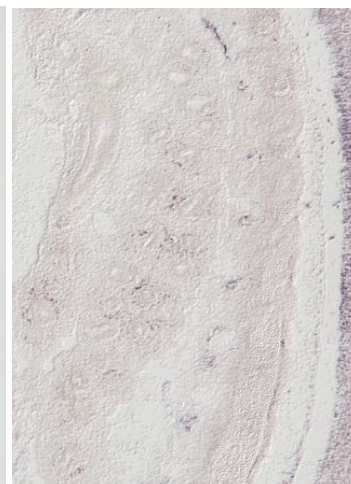

SEMA7A NMRI

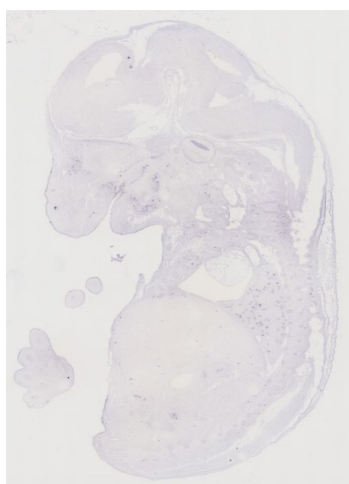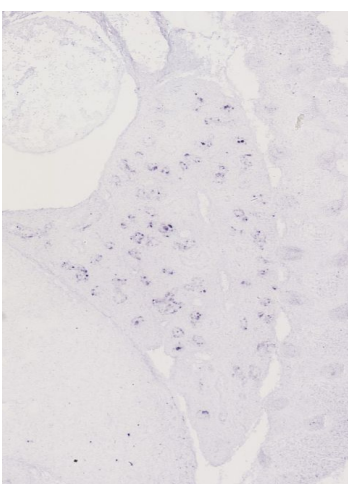

SLC35A5 C57BL/6



Supplemental Figure S4

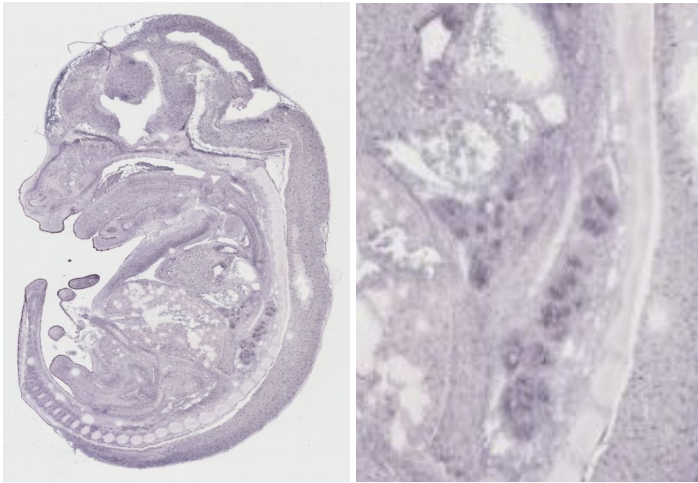

SLC38A2 C57BL/6

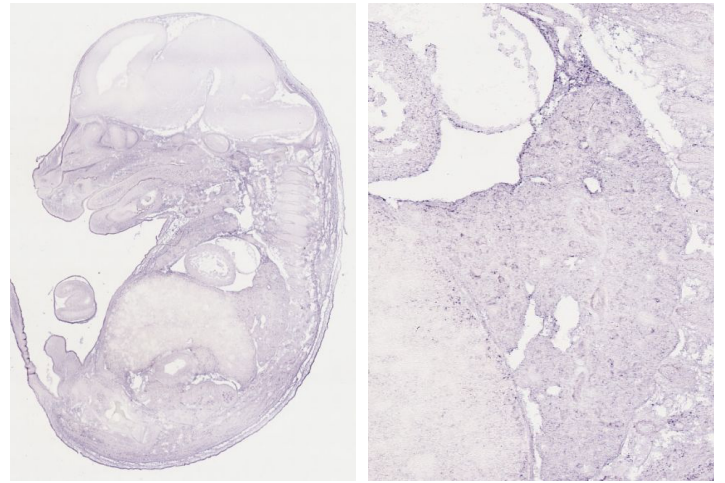

SLC38A4 C57BL/6

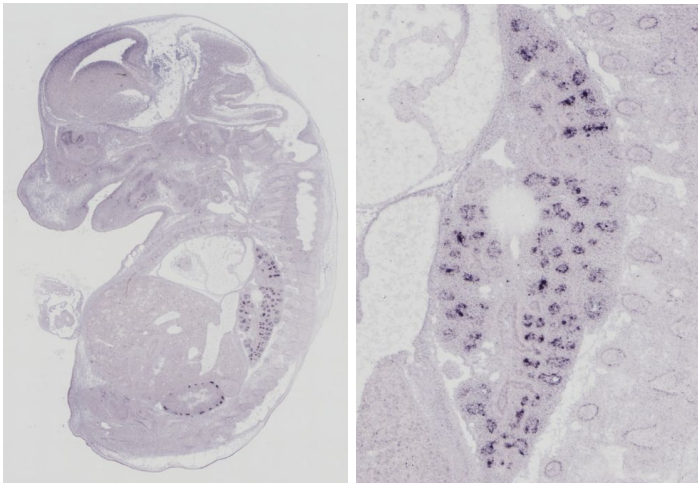

SLCO4C1 C57BL/6

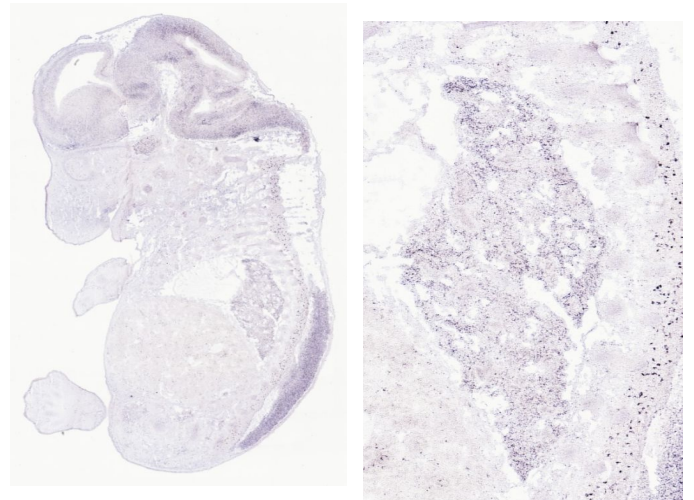

ST8SIA4 C57BL/6

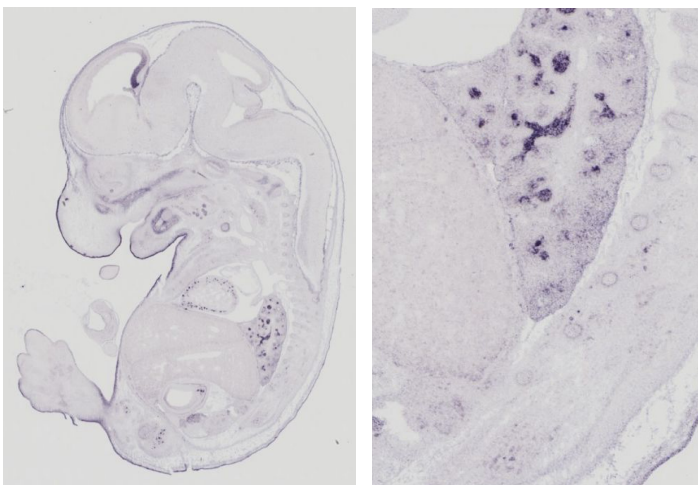

TNFRSF19 C57BL/6

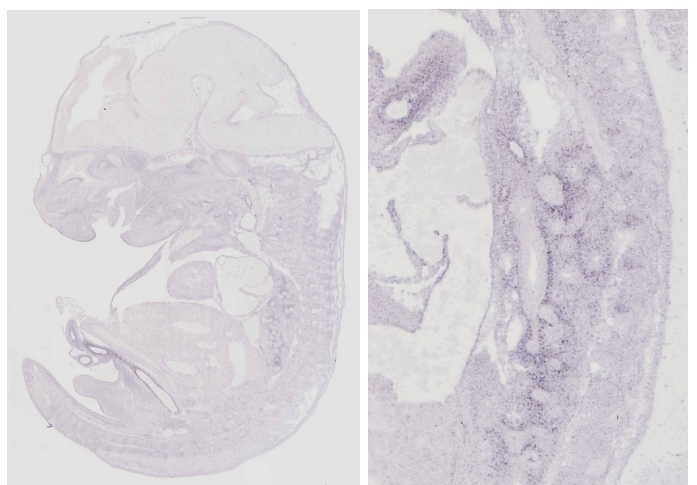

TNS1 C57BL/6

Supplemental Figure S4

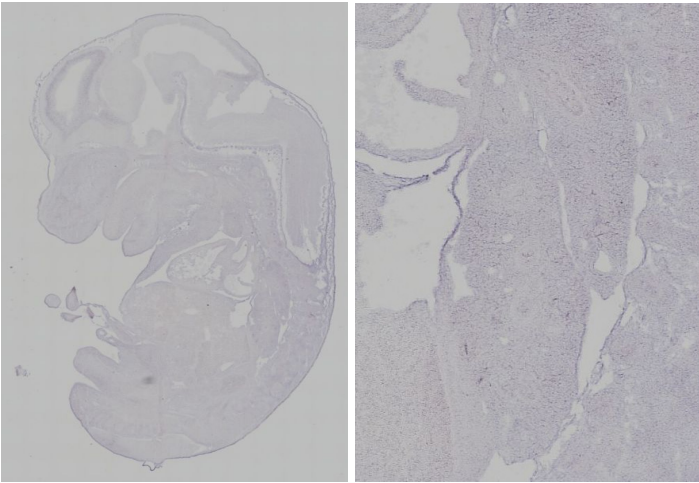

TTK C57BL/6

Supplemental Figure S5

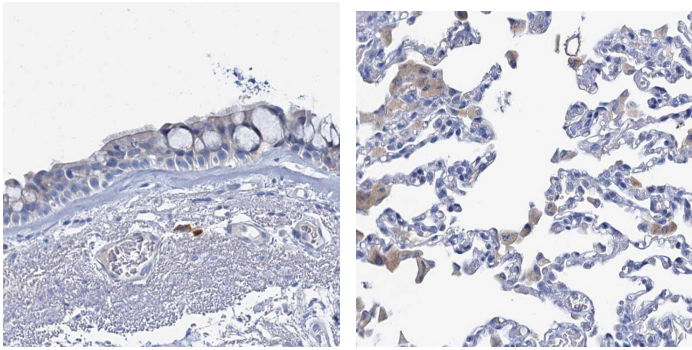

AACS

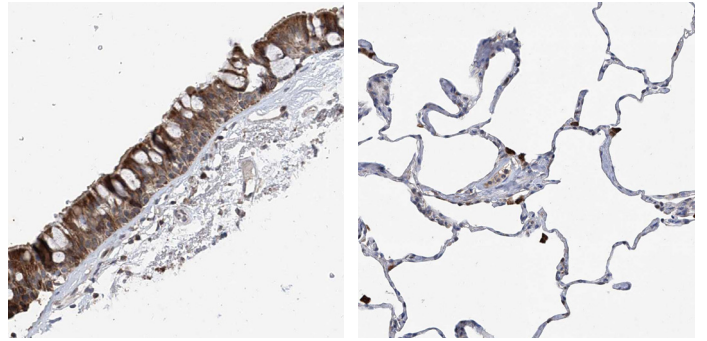

BCKDHB

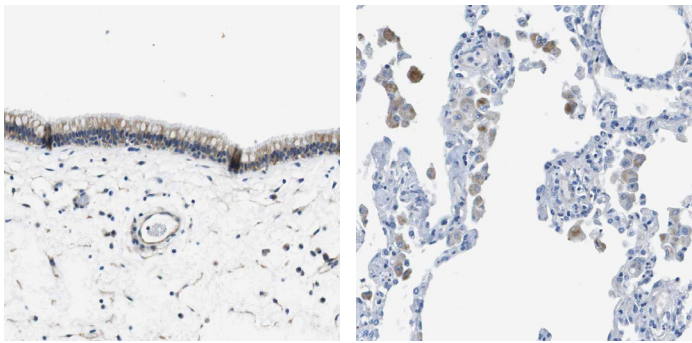

CYP11A1

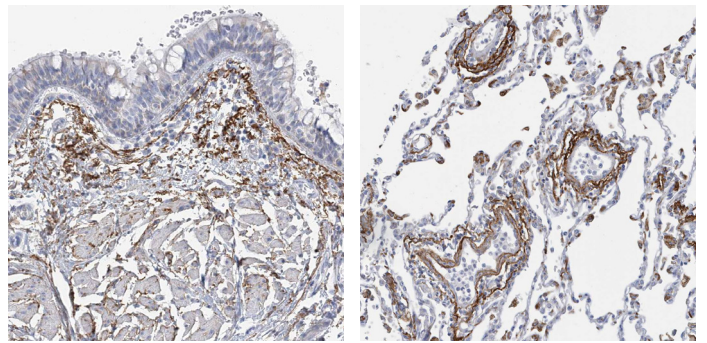

DOCK10

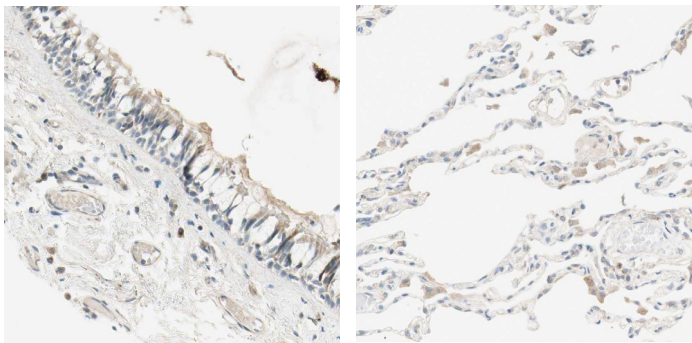

IGFBP5

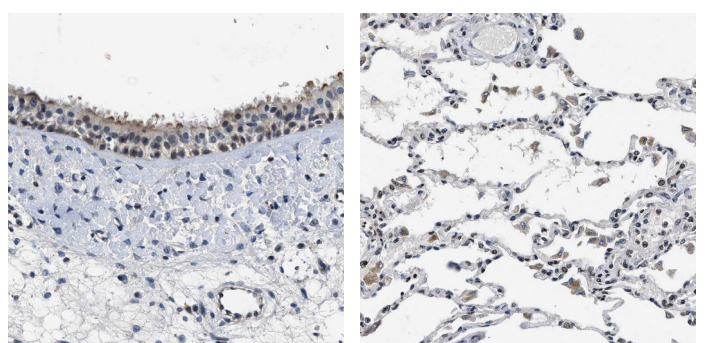

IKBKAP

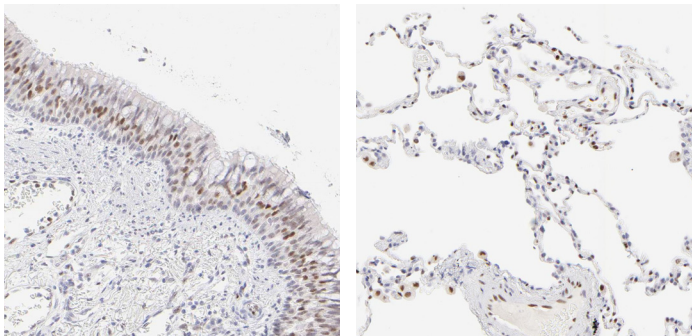

KLF4

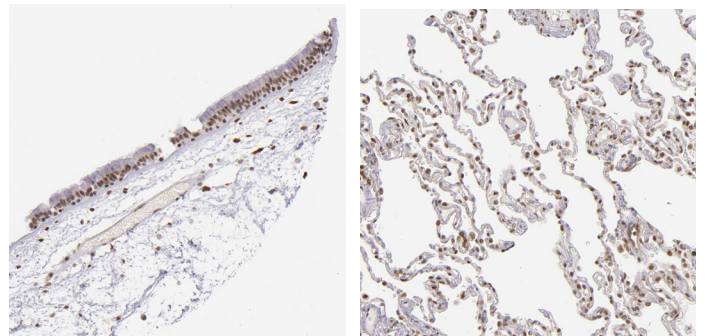

NCOR2

Supplemental Figure S5

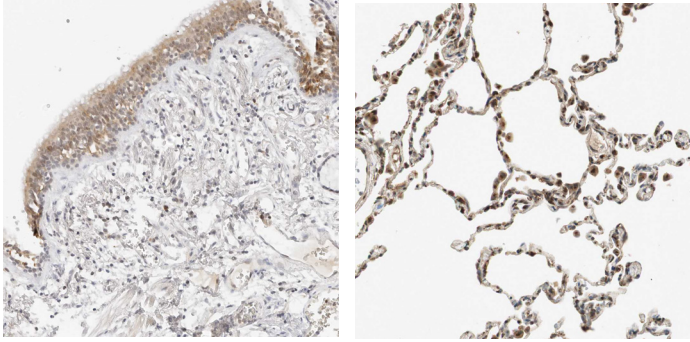

NEO1

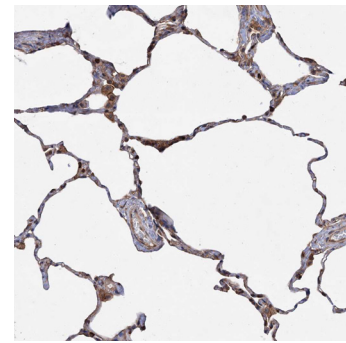

PACS1

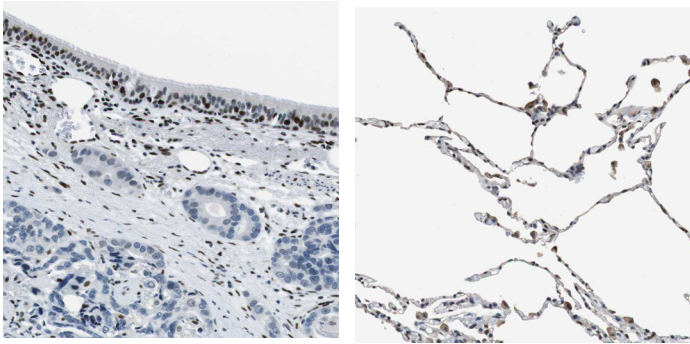

PML

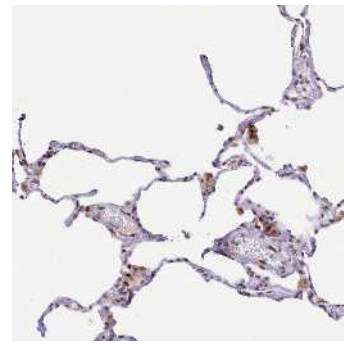

PPIP5K2

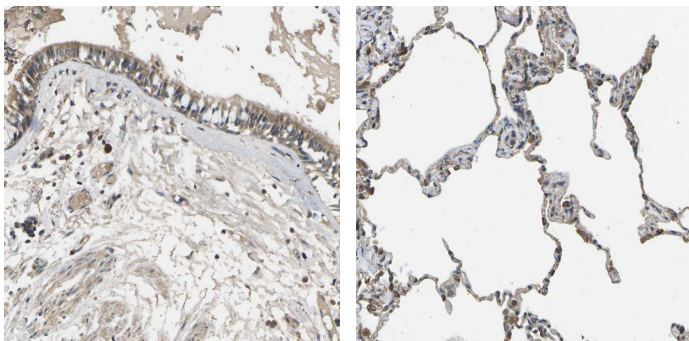

SACS

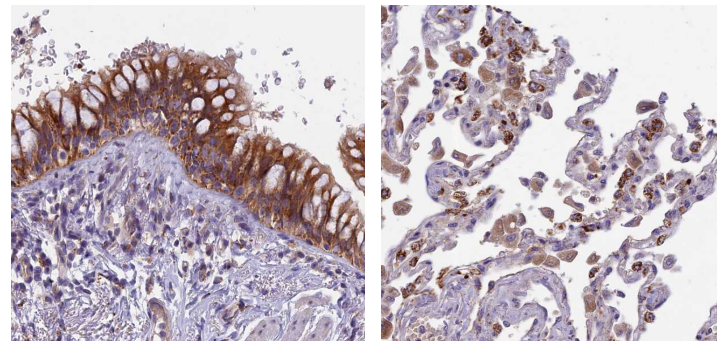

SEMA7A

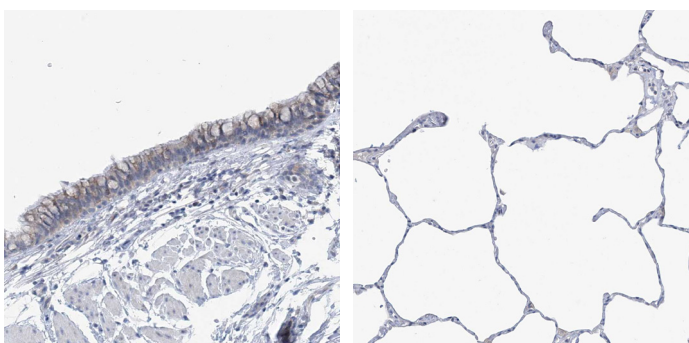

SLC35A5

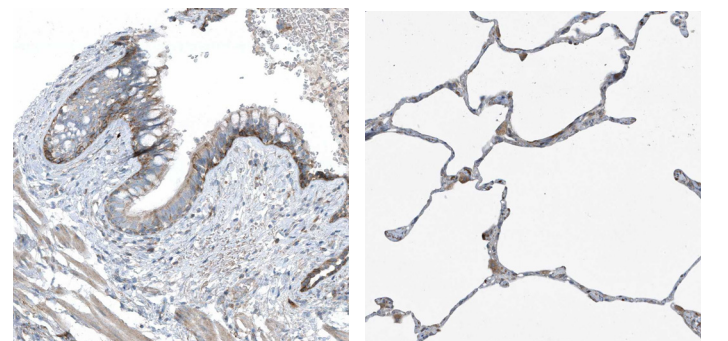

SLC38A2

Supplemental Figure S5

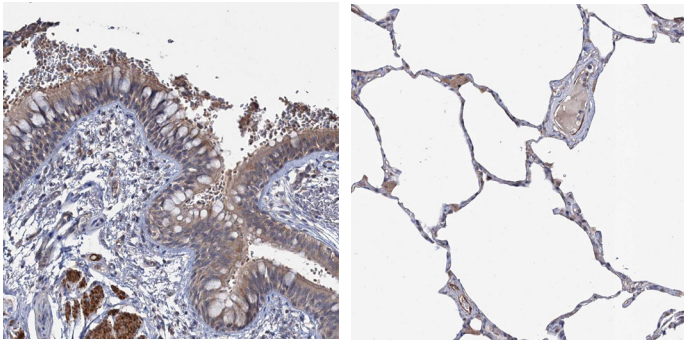

SLC38A4

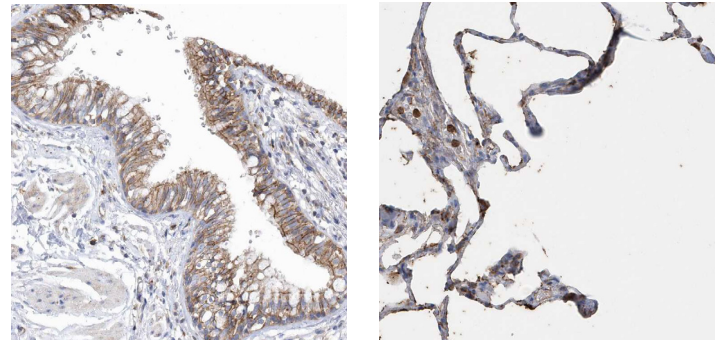

SLCO4C1

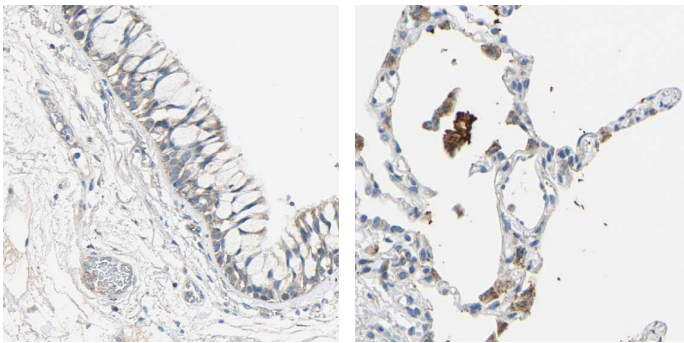

TNFRSF19

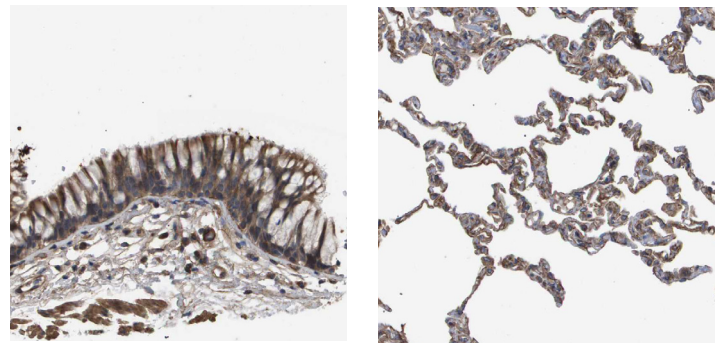

TNS1

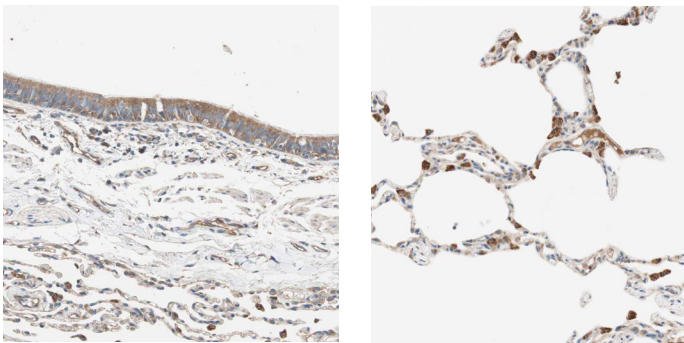

TTK

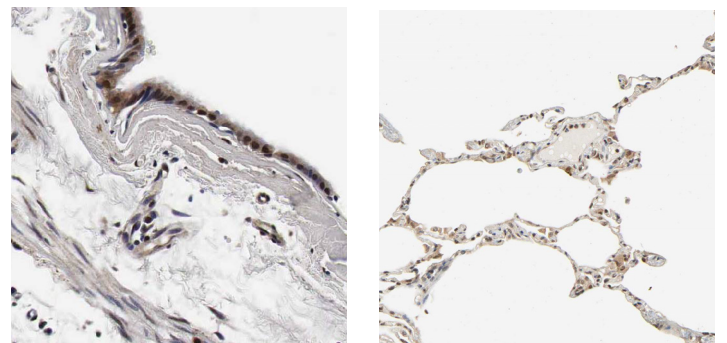

UBC
