# Supplementary material
Source: PubMed Central journal article supplement (PMC3423464)
Supplement: supp_47.2.234_Leikauf_ODS_suppl_tables_1-7.pdf [file supp_47.2.234_Leikauf_ODS_suppl_tables_1-7.pdf]

**Supplemental Table S1. Single nucleotide polymorphisms (SNP) associated with survival in chlorine (45 ppm) in mice as determined by haplotype mapping of 40 inbred strains**

| SNP          | Chr | Positon (bp) | dbSNP ID   | Alleles | P value  | neg. Log P |
|--------------|-----|--------------|------------|---------|----------|------------|
| 01-72920639  | 1   | 72920639     | rs3021883  | C/T     | 8.35E-05 | 4.08       |
| 01-98234337  | 1   | 98234337     | rs32166387 | C/T     | 9.50E-05 | 4.02       |
| 01-98242699  | 1   | 98242699     | rs30744814 | A/T     | 8.16E-05 | 4.09       |
| 01-98322161  | 1   | 98322161     | rs32283220 | C/T     | 4.38E-05 | 4.36       |
| 01-98370062  | 1   | 98370062     | rs32490444 | C/T     | 4.38E-05 | 4.36       |
| 01-98701146  | 1   | 98701146     | rs13476000 | G/T     | 2.41E-06 | 5.62       |
| 01-116876554 | 1   | 116876554    | rs3696077  | A/G     | 4.08E-05 | 4.39       |
| 01-190870356 | 1   | 190870356    | rs6189114  | A/G     | 9.45E-05 | 4.02       |
| 04-55986910  | 4   | 55986910     | rs27805492 | C/T     | 1.02E-05 | 4.99       |
| 04-56031331  | 4   | 56031331     | rs27788743 | A/G     | 3.42E-05 | 4.47       |
| 04-56037988  | 4   | 56037988     | rs27788694 | A/G     | 6.43E-05 | 4.19       |
| 04-56041253  | 4   | 56041253     | rs27788661 | A/T     | 3.86E-05 | 4.41       |
| 04-56049903  | 4   | 56049903     | rs27788598 | A/G     | 5.64E-05 | 4.25       |
| 04-56071548  | 4   | 56071548     | rs27769943 | A/T     | 5.70E-05 | 4.24       |
| 04-56076443  | 4   | 56076443     | rs27769900 | C/T     | 3.42E-05 | 4.47       |
| 04-56246226  | 4   | 56246226     | rs28336421 | G/T     | 1.02E-05 | 4.99       |
| 04-56268436  | 4   | 56268436     | rs28289142 | C/T     | 4.13E-05 | 4.38       |
| 04-56268476  | 4   | 56268476     | rs28289141 | C/T     | 2.14E-06 | 5.67       |
| 04-56273857  | 4   | 56273857     | rs28289109 | A/G     | 4.74E-05 | 4.32       |
| 04-56318052  | 4   | 56318052     | rs27868907 | G/T     | 3.42E-05 | 4.47       |
| 04-56330662  | 4   | 56330662     | rs27868810 | A/G     | 2.41E-06 | 5.62       |
| 04-56362261  | 4   | 56362261     | rs27853349 | C/T     | 5.51E-06 | 5.26       |
| 04-56426555  | 4   | 56426555     | rs32078659 | C/T     | 1.46E-05 | 4.84       |
| 04-95050496  | 4   | 95050496     | rs28332543 | A/G     | 5.67E-05 | 4.25       |
| 04-95067725  | 4   | 95067725     | rs28326102 | A/C/T   | 9.76E-05 | 4.01       |
| 04-95073057  | 4   | 95073057     | rs28326058 | C/T     | 5.26E-05 | 4.28       |
| 04-95088253  | 4   | 95088253     | rs32311741 | A/G     | 3.85E-05 | 4.41       |
| 04-95088380  | 4   | 95088380     | rs32682570 | C/T     | 9.10E-05 | 4.04       |
| 04-100081904 | 4   | 100081904    | rs28199319 | C/T     | 5.99E-05 | 4.22       |
| 05-49570422  | 5   | 49570422     | (liftover) | C/A     | 7.69E-05 | 4.11       |
| 05-111096776 | 5   | 111096776    | rs29551523 | A/T     | 9.86E-05 | 4.01       |
| 05-125498899 | 5   | 125498899    | rs29526748 | A/G     | 7.14E-05 | 4.15       |
| 05-125500607 | 5   | 125500607    | rs33273829 | A/G     | 6.62E-05 | 4.18       |
| 05-125502713 | 5   | 125502713    | rs33262018 | C/T     | 6.62E-05 | 4.18       |
| 05-125505860 | 5   | 125505860    | rs3664741  | A/G     | 7.29E-05 | 4.14       |
| 05-125995648 | 5   | 125995648    | rs13478509 | A/C     | 7.14E-05 | 4.15       |
| 05-125996775 | 5   | 125996775    | (liftover) | C/T     | 2.24E-05 | 4.65       |
| 05-130988375 | 5   | 130988375    | rs33356465 | G/T     | 8.71E-05 | 4.06       |
| 05-130988828 | 5   | 130988828    | rs3668978  | C/T     | 1.54E-05 | 4.81       |
| 05-131016066 | 5   | 131016066    | rs33254574 | C/T     | 1.97E-05 | 4.70       |
| 05-131070808 | 5   | 131070808    | (liftover) | A/G     | 7.07E-05 | 4.15       |
| 05-150962189 | 5   | 150962189    | rs13494086 | C/T     | 3.96E-05 | 4.40       |
| 05-151155327 | 5   | 151155327    | (liftover) | G/T     | 7.45E-05 | 4.13       |
| 06-53931220  | 6   | 53931220     | rs30005610 | A/C     | 6.64E-05 | 4.18       |
| 09-58075842  | 9   | 58075842     | rs3674363  | A/G     | 1.05E-05 | 4.98       |
| 09-84014785  | 9   | 84014785     | rs30022241 | C/T     | 1.27E-05 | 4.89       |
| 09-84331171  | 9   | 84331171     | rs29749092 | A/G     | 3.25E-05 | 4.49       |
| 09-84347984  | 9   | 84347984     | rs29593435 | C/T     | 2.70E-05 | 4.57       |
| 09-84374004  | 9   | 84374004     | rs13480314 | A/T     | 2.70E-05 | 4.57       |
| 09-84389460  | 9   | 84389460     | rs30428659 | C/T     | 4.25E-05 | 4.37       |
| 09-84389595  | 9   | 84389595     | rs30039466 | C/T     | 5.84E-05 | 4.23       |
| 11-43786077  | 11  | 43786077     | rs3691185  | A/G     | 3.80E-05 | 4.42       |
| 12-104908453 | 12  | 104908453    | rs29168632 | G/T     | 8.86E-05 | 4.05       |
| 12-106190281 | 12  | 106190281    | rs29216387 | A/T     | 6.92E-05 | 4.16       |
| 14-61611931  | 14  | 61611931     | rs30388803 | A/G     | 3.81E-05 | 4.42       |
| 14-61634154  | 14  | 61634154     | rs30799902 | G/T     | 6.98E-05 | 4.16       |
| 14-61653359  | 14  | 61653359     | rs31494273 | A/G     | 5.35E-05 | 4.27       |
| 14-61726464  | 14  | 61726464     | rs6318708  | C/T     | 5.83E-05 | 4.23       |
| 14-61757975  | 14  | 61757975     | rs30570755 | A/G     | 4.90E-05 | 4.31       |
| 14-73150152  | 14  | 73150152     | rs31437466 | C/G     | 9.09E-05 | 4.04       |
| 15-86581160  | 15  | 86581160     | rs32140175 | C/T     | 8.46E-05 | 4.07       |
| 15-96687641  | 15  | 96687641     | rs32255071 | G/T     | 5.61E-07 | 6.25       |
| 15-96757900  | 15  | 96757900     | rs31945812 | C/T     | 8.89E-05 | 4.05       |
| 16-45150787  | 16  | 45150787     | (liftover) | C/T     | 7.22E-05 | 4.14       |
| 16-45150868  | 16  | 45150868     | rs4180445  | A/T     | 7.22E-05 | 4.14       |
| 18-9489146   | 18  | 9489146      | rs13483198 | A/G     | 8.70E-05 | 4.06       |
| 18-59213468  | 18  | 59213468     | (liftover) | A/T     | 4.27E-05 | 4.37       |

Supplemental Table S2. Nonsynonymous single nucleotide polymorphisms in candidate genes associated with chlorine-induced acute lung injury

| Chr | bp        | SNP        | Gene NCBI       | Type          | Functional Domain                                                      | Phenotype | Allele Freq. | Gene Name                                                                                      |
|-----|-----------|------------|-----------------|---------------|------------------------------------------------------------------------|-----------|--------------|------------------------------------------------------------------------------------------------|
| 1   | 73961123  | rs36340401 | Tns1 exon35     | Cn N1882S     | PH-like; Pleckstrin homology-like domain.                              | 0.20      | 0.30         | tensin1                                                                                        |
| 1   | 73971312  | rs32231492 | Tns1 exon26     | Cn T1585M     | none                                                                   | 0.10      | 0.04         | tensin1                                                                                        |
| 1   | 73972150  | rs37603471 | Tns1 exon26     | Cn T1306P     | PHA03245; large tegument protein UL36; Provisional.                    | 0.15      | 0.05         | tensin1                                                                                        |
| 1   | 73992959  | rs40124058 | Tns1 exon19     | Cn L944V      | PHA03245; large tegument protein UL36; Provisional.                    | 0.20      | 0.30         | tensin1                                                                                        |
| 1   | 80498325  | rs51400299 | Dock10 exon56   | Cn A2173V     | none                                                                   | 0.13      | 0.26         | dedicator of cytokinesis 10                                                                    |
| 1   | 80529022  | rs30207844 | Dock10 exon43   | Cn I1567V     | none                                                                   | 0.18      | 0.28         | dedicator of cytokinesis 10                                                                    |
| 1   | 80535413  | rs30205362 | Dock10 exon39   | Cn R1404G     | none                                                                   | 0.30      | 0.22         | dedicator of cytokinesis 10                                                                    |
| 1   | 80570798  | rs30209331 | Dock10 exon17   | Cn T644S      | none                                                                   | 0.08      | 0.26         | dedicator of cytokinesis 10                                                                    |
| 1   | 98715571  | rs37471241 | Slo4c1 exon13   | Cn T707A      | none                                                                   | 0.16      | 0.38         | solute carrier organic anion transporter family, member 4C1                                    |
| 1   | 98737815  | rs36844908 | Slo4c1 exon5    | Cn K298E      | OATP: Organic Anion Transporter Polypeptide (OATP) family.             | 0.05      | 0.22         | solute carrier organic anion transporter family, member 4C1                                    |
| 1   | 98741230  | rs36841977 | Slo4c1 exon3    | Cn T203S      | OATP: Organic Anion Transporter Polypeptide (OATP) family.             | 0.17      | 0.05         | solute carrier organic anion transporter family, member 4C1                                    |
| 1   | 98768548  | rs37810488 | Slo4c1 exon1    | Cn R46W       | none                                                                   | 0.06      | 0.19         | solute carrier organic anion transporter family, member 4C1                                    |
| 1   | 99604387  | rs36402198 | Pdp5k2 exon27   | Cn T1093A     | none                                                                   | 0.10      | 0.02         | diphosphonositol pentakisphosphate kinase 2                                                    |
| 4   | 56768181  | rs27835086 | Ikbpap exon36   | Cn A1309V     | none                                                                   | 0.18      | 0.23         | inhibitor of kappa light polypeptide enhancer in B-cells, kinase complex-associated protein    |
| 4   | 56789591  | rs27869847 | Ikbpap exon18   | Cn G662V      | IKI3; IKI3 family.                                                     | 0.11      | 0.24         | inhibitor of kappa light polypeptide enhancer in B-cells, kinase complex-associated protein    |
| 4   | 56793941  | rs27869832 | Ikbpap exon14   | Cn T534A      | IKI3; IKI3 family.                                                     | 0.10      | 0.15         | inhibitor of kappa light polypeptide enhancer in B-cells, kinase complex-associated protein    |
| 4   | 56800766  | rs27869828 | Ikbpap exon11   | Cn I345V      | IKI3; IKI3 family.                                                     | 0.11      | 0.24         | inhibitor of kappa light polypeptide enhancer in B-cells, kinase complex-associated protein    |
| 4   | 56803054  | rs27869827 | Ikbpap exon10   | Cn I302V      | IKI3; IKI3 family.                                                     | 0.10      | 0.15         | inhibitor of kappa light polypeptide enhancer in B-cells, kinase complex-associated protein    |
| 4   | 56805325  | rs27869825 | Ikbpap exon7    | Cn H193R      | IKI3; IKI3 family.                                                     | 0.10      | 0.15         | inhibitor of kappa light polypeptide enhancer in B-cells, kinase complex-associated protein    |
| 4   | 56848100  | rs27869872 | Ctnna1 exon7    | Cn T348S      | Vinculin; Vinculin family.                                             | 0.16      | 0.17         | catenin (cadherin associated protein), alpha-like 1                                            |
| 4   | 100006216 | rs28214987 | Ror1 exon3      | Cn D54G       | none                                                                   | 0.08      | 0.20         | receptor tyrosine kinase-like orphan receptor 1                                                |
| 4   | 100006258 | rs28214986 | Ror1 exon3      | Cn T68M       | none                                                                   | 0.02      | 0.08         | receptor tyrosine kinase-like orphan receptor 1                                                |
| 4   | 100006308 | rs28214985 | Ror1 exon3      | Cn P85S       | Ig; immunoglobulin domain.                                             | 0.02      | 0.08         | receptor tyrosine kinase-like orphan receptor 1                                                |
| 5   | 125604549 | rs36571333 | Nor2 exon44     | Cn T229A      | none                                                                   | 0.14      | 0.24         | nuclear receptor co-repressor 2                                                                |
| 5   | 125953633 | rs38516850 | Aacs exon1      | Cn Q5R        | none                                                                   | 0.20      | 0.28         | acetoacetyl-CoA synthetase                                                                     |
| 5   | 125964988 | rs36326951 | Aacs exon3      | Cn R106W      | ac ac. CoA. syn; acetoacetyl-CoA synthetase.                           | 0.02      | 0.02         | acetoacetyl-CoA synthetase                                                                     |
| 5   | 125989036 | rs36769124 | Aacs exon9      | Cn T321I      | LuxE; Acyl-protein synthetase, LuxE.                                   | 0.20      | 0.28         | acetoacetyl-CoA synthetase                                                                     |
| 5   | 151212146 | rs13501190 | Gm3647 exon1    | Cn Y27C Fry I | unknown                                                                | 0.03      | 0.08         | predicted gene 3647                                                                            |
| 5   | 151269426 | rs50343365 | Fry exon22      | Cn T2568A     | unknown                                                                | 0.14      | 0.19         | furry homolog (Drosophila)                                                                     |
| 5   | 151293359 | rs48910995 | Fry exon29      | Cn R2897G     | unknown                                                                | 0.11      | 0.02         | furry homolog (Drosophila)                                                                     |
| 9   | 57602646  | rs57784465 | Sema7a exon5    | Cn M157V      | Sema7a; Sema domain.                                                   | 0.06      | 0.07         | sema domain, immunoglobulin domain (Ig), and GPI membrane anchor. (semaphorin) 7A              |
| 9   | 57662934  | rs47744431 | Cyp11a1 exon1   | Cn T29S       | none                                                                   | 0.06      | 0.32         | cytochrome P450, family 11, subfamily a, polypeptide 1                                         |
| 9   | 57663002  | rs45867326 | Cyp11a1 exon1   | Cn N52D       | p450; Cytochrome P450.                                                 | 0.03      | 0.05         | cytochrome P450, family 11, subfamily a, polypeptide 1                                         |
| 9   | 57674645  | rs47078233 | Cyp11a1 exon9   | Cn N522D      | none                                                                   | 0.14      | 0.14         | cytochrome P450, family 11, subfamily a, polypeptide 1                                         |
| 9   | 58605782  | rs37015382 | Neol exon6      | Cn T375S      | Ig4; Neogenin; Fourth (Ig)-like domain in neogenin & similar proteins. | 0.09      | 0.10         | neogenin                                                                                       |
| 9   | 58626537  | rs48614416 | Neol exon5      | Cn G314C      | Ig; immunoglobulin domain                                              | 0.09      | 0.10         | neogenin                                                                                       |
| 9   | 83737980  | rs33070516 | Ttk exon9       | Cn *302L      | none                                                                   | 0.12      | 0.48         | Ttk protein kinase                                                                             |
| 9   | 83737991  | rs33070518 | Ttk exon9       | Cn T306P      | none                                                                   | 0.12      | 0.48         | Ttk protein kinase                                                                             |
| 9   | 83739533  | rs33072860 | Ttk exon10      | Cn P325S      | none                                                                   | 0.09      | 0.42         | Ttk protein kinase                                                                             |
| 14  | 61589881  | rs37583013 | Tnfrsf19 exon9  | Cn T342A      | none                                                                   | 0.14      | 0.40         | tumor necrosis factor receptor superfamily, member 19                                          |
| 14  | 61589910  | rs37057478 | Tnfrsf19 exon9  | Cn T332I      | none                                                                   | 0.01      | 0.10         | tumor necrosis factor receptor superfamily, member 19                                          |
| 14  | 61590049  | rs37057546 | Tnfrsf19 exon9  | Cn N286D      | none                                                                   | 0.14      | 0.40         | tumor necrosis factor receptor superfamily, member 19                                          |
| 14  | 61811090  | rs37488975 | Sacs exon8      | Cn P586R      | none                                                                   | 0.19      | 0.02         | sacsin                                                                                         |
| 14  | 61859208  | rs36287810 | Sacs exon1      | Cn N748S      | none                                                                   | 0.01      | 0.10         | sacsin                                                                                         |
| 15  | 96417540  | rs48171807 | Slc38a1 exon8   | Cn M229V      | Slc38a1; Amino acid permeases [Amino acid transport and metabolism].   | 0.02      | 0.32         | solute carrier family 38, member 1                                                             |
| 15  | 96454395  | rs50093952 | Slc38a1 exon1   | Cn Q37H       | none                                                                   | 0.02      | 0.35         | solute carrier family 38, member 1                                                             |
| 15  | 96827431  | rs46306226 | Slc38a4 exon16  | Cn N544S      | none                                                                   | 0.13      | 0.18         | solute carrier family 38, member 4                                                             |
| 16  | 45143771  | rs32739736 | Slc35a5 exon6   | Cn H403R      | none                                                                   | 0.12      | 0.48         | solute carrier family 35, member A5                                                            |
| 16  | 45144489  | rs32739740 | Slc35a5 exon6   | Cn A164S      | Nuc. sug. transp. Nucleotide-sugar transporter.                        | 0.11      | 0.02         | solute carrier family 35, member A5                                                            |
| 18  | 59050071  | rs49894877 | Adamts19 exon3  | Cn H294Y      | none                                                                   | 0.09      | 0.13         | a disintegrin-like and metalloproteinase (reprolysin type) with thrombospondin type 1 motif 19 |
| 18  | 59114177  | rs36713129 | Adamts19 exon10 | Cn S541G      | ZnMc, ADAMTS like; Zinc-dependent metalloprotease.                     | 0.04      | 0.05         | a disintegrin-like and metalloproteinase (reprolysin type) with thrombospondin type 1 motif 19 |

Supplemental Table S3. Lung transcript levels of candidate genes with single nucleotide polymorphisms associated with survival during chlorine-induced lung injury in sensitive C57BLKS/J and resistant C57BL/10J mouse strains.

| Symbol   | Gene ID | C57BL/10J vs. C57BLKS/J |      |       | C57BLKS/J            |      |        | C57BLKS/J             |      |        | C57BLKS/J            |       |        | C57BL/10J             |      |        | Gene Name                                                                                    | Assay ID    | Method |        |
|----------|---------|-------------------------|------|-------|----------------------|------|--------|-----------------------|------|--------|----------------------|-------|--------|-----------------------|------|--------|----------------------------------------------------------------------------------------------|-------------|--------|--------|
|          |         | 0 hours                 |      | p     | 6 h vs 0 h C57BLKS/J |      | p      | 12 h vs 0 h C57BLKS/J |      | p      | 6 h vs 0 h C57BLKS/J |       | p      | 12 h vs 0 h C57BLKS/J |      | p      |                                                                                              |             |        |        |
|          |         | Mean                    | SE   |       | Mean                 | SE   |        | Mean                  | SE   |        | Mean                 | SE    |        | Mean                  | SE   |        |                                                                                              |             |        | Mean   |
| Aacs     | 78894   | -0.74                   | 0.08 | 0.021 | -0.01                | 0.12 | NS     | -0.51                 | 0.25 | NS     | -0.44                | -1.20 | NS     | 0.18                  | 0.16 | NS     | acetyl-CoA synthetase                                                                        | Mm00618866  | m1     | TDLA   |
| Adamts19 | 240322  | 0.28                    | 0.11 | NS    | -0.80                | 0.43 | NS     | -0.09                 | 0.26 | NS     | 1.13                 | 0.27  | <0.001 | 0.68                  | 0.15 | <0.001 | a disintegrin-like and metalloprotease (repolysin type) with thrombospondin type 1 motif, 19 | Mm00513427  | m1     | Manual |
| Bckdhb   | 120400  | -0.37                   | 0.14 | NS    | -0.25                | 0.17 | NS     | -0.51                 | 0.15 | NS     | -0.26                | 0.15  | NS     | -0.62                 | 0.11 | NS     | branched chain ketoacid dehydrogenase E1, beta polypeptide                                   | Mm00516037  | m1     | TDLA   |
| Cttnal1  | 54366   | -0.01                   | 0.11 | NS    | -0.15                | 0.17 | NS     | 0.15                  | 0.19 | NS     | 0.34                 | 0.10  | NS     | 0.42                  | 0.08 | NS     | catenin (cadherin associated protein), alpha-like 1                                          | Mm00628416  | m1     | TDLA   |
| Cyp11a1  | 13070   | -1.22                   | 0.24 | 0.002 | 1.24                 | 0.24 | 0.005  | -0.98                 | 0.39 | 0.022  | -0.59                | 0.21  | NS     | -2.11                 | 0.41 | ns     | cytochrome P450, family 11, subfamily a, polypeptide 1                                       | Mm00614273  | m1     | TDLA   |
| Docx10   | 210293  | -0.39                   | 0.21 | NS    | -0.33                | 0.19 | NS     | -0.49                 | 0.22 | NS     | -0.13                | 0.10  | NS     | -0.64                 | 0.11 | NS     | dedicator of cytokinesis 10                                                                  | Mm00476969  | m1     | TDLA   |
| Fry      | 320365  | -0.17                   | 0.09 | NS    | 0.03                 | 0.08 | NS     | -0.29                 | 0.20 | NS     | 0.21                 | 0.10  | NS     | -0.11                 | 0.06 | NS     | furin homolog (Drosophila)                                                                   | Mm00472322  | m1     | TDLA   |
| Igfbp5   | 16011   | -0.35                   | 0.19 | NS    | -0.11                | 0.15 | NS     | -0.27                 | 0.22 | NS     | 0.03                 | 0.16  | NS     | -0.69                 | 0.12 | NS     | insulin-like growth factor binding protein 5                                                 | Mm00443462  | m1     | TDLA   |
| Ikkap    | 230233  | -0.41                   | 0.20 | NS    | -0.20                | 0.11 | NS     | -0.24                 | 0.16 | NS     | -0.43                | -0.68 | NS     | 0.14                  | 0.16 | NS     | inhibitor of kappa light polypeptide enhancer in B-cells, kinase complex-associated protein  | Mm00620535  | m1     | TDLA   |
| Klf4     | 16600   | 1.45                    | 0.32 | 0.001 | 2.31                 | 0.25 | <0.001 | 2.48                  | 0.33 | <0.001 | 3.86                 | 0.41  | <0.001 | 4.25                  | 0.47 | <0.001 | Kruppel-like factor 4 (gut)                                                                  | Mm01611440  | mH     | Manual |
| Ncor2    | 20602   | -0.93                   | 0.26 | 0.011 | -0.10                | 0.35 | NS     | 0.13                  | 0.32 | NS     | 0.29                 | 0.11  | NS     | 0.63                  | 0.12 | NS     | nuclear receptor co-repressor 2                                                              | Mm00443258  | m1     | Manual |
| Neo1     | 18007   | -0.05                   | 0.08 | NS    | 0.17                 | 0.10 | NS     | -0.03                 | 0.20 | NS     | 0.49                 | 0.06  | NS     | 0.41                  | 0.08 | <0.001 | neogenin                                                                                     | Mm00456300  | m1     | TDLA   |
| Pacs1    | 107975  | -0.06                   | 0.21 | NS    | 0.28                 | 0.14 | NS     | 0.15                  | 0.20 | NS     | 0.57                 | 0.07  | NS     | 0.41                  | 0.09 | NS     | phosphotitrin acid cluster sorting protein 1                                                 | Mm00452886  | m1     | TDLA   |
| Pml      | 18854   | -0.06                   | 0.15 | NS    | -0.28                | 0.13 | NS     | -0.70                 | 0.22 | 0.005  | -0.22                | 0.05  | NS     | -0.59                 | 0.06 | NS     | promyelocytic leukemia                                                                       | Mm00476326  | m1     | TDLA   |
| Pip5k2   | 227399  | -0.24                   | 0.17 | NS    | -0.39                | 0.13 | NS     | -0.62                 | 0.25 | NS     | -0.13                | 0.08  | NS     | -0.27                 | 0.07 | NS     | diphosphoinositol pentakisphosphate kinase 2                                                 | Mm00462332  | m1     | TDLA   |
| Ror1     | 26563   | 0.08                    | 0.11 | NS    | 0.49                 | 0.09 | NS     | 0.74                  | 0.20 | <0.001 | 0.86                 | 0.13  | <0.001 | 0.94                  | 0.11 | <0.001 | receptor tyrosine kinase-like orphan receptor 1                                              | Mm01198158  | m1     | TDLA   |
| Sacs     | 50720   | -0.12                   | 0.06 | NS    | -0.28                | 0.12 | NS     | -0.38                 | 0.25 | NS     | 0.22                 | 0.09  | 0.014  | -0.14                 | 0.09 | NS     | sacsin                                                                                       | Mm00506391  | m1     | TDLA   |
| Scna2a   | 20361   | 0.05                    | 0.14 | NS    | 1.34                 | 0.13 | <0.001 | 0.97                  | 0.15 | <0.001 | 1.46                 | 0.06  | 0.060  | 1.76                  | 0.10 | NS     | semaphorin domain, immunoglobulin domain (lg), and GPI membrane anchor, (semaphorin) 7A      | Mm00516105  | g1     | Manual |
| Slc35a5  | 74102   | -0.12                   | 0.16 | NS    | -0.93                | 0.22 | <0.001 | -1.24                 | 0.16 | <0.001 | -0.51                | 0.06  | <0.001 | -0.74                 | 0.09 | NS     | solute carrier family 35, member A5                                                          | Mm00490735  | m1     | TDLA   |
| Slc38a1  | 105727  | 0.09                    | 0.17 | NS    | -0.27                | 0.20 | NS     | -0.39                 | 0.25 | NS     | 0.45                 | 0.07  | 0.182  | 0.14                  | 0.06 | NS     | solute carrier family 38, member 1                                                           | Mm00554204  | m1     | TDLA   |
| Slc38a2  | 67760   | -0.35                   | 0.07 | 0.004 | 0.06                 | 0.09 | NS     | 0.17                  | 0.19 | NS     | 0.18                 | 0.06  | 1.300  | 0.09                  | 0.08 | NS     | solute carrier family 38, member 2                                                           | Mm000441361 | m1     | TDLA   |
| Slc38a4  | 69354   | -0.37                   | 0.11 | 0.009 | 1.81                 | 0.08 | <0.001 | 1.30                  | 0.20 | <0.001 | 2.45                 | 0.08  | <0.001 | 2.55                  | 0.07 | <0.001 | solute carrier family 38, member 4                                                           | Mm00809556  | s1     | Manual |
| Sloc4a1  | 227394  | -0.31                   | 0.16 | NS    | -1.42                | 0.17 | <0.001 | -2.09                 | 0.18 | <0.001 | -1.52                | 0.10  | <0.001 | -2.11                 | 0.12 | 0.002  | solute carrier organic anion transporter family, member 4C1                                  | Mm00558559  | m1     | TDLA   |
| Sls4a4   | 20452   | -0.22                   | 0.30 | NS    | -1.74                | 0.34 | <0.001 | -1.84                 | 0.23 | <0.001 | -1.32                | 0.11  | <0.001 | -1.06                 | 0.09 | NS     | ST8 alpha-N-acetyl-neuraminide alpha-2,8-sialyltransferase 4                                 | Mm00490001  | m1     | TDLA   |
| Tnfrsf19 | 29620   | 0.00                    | 0.14 | NS    | -0.08                | 0.08 | NS     | -0.49                 | 0.32 | NS     | 0.16                 | 0.11  | NS     | -0.01                 | 0.10 | NS     | tumor necrosis factor receptor superfamily, member 19                                        | Mm00443506  | m1     | Manual |
| Tnfr1    | 21961   | -0.11                   | 0.14 | NS    | 0.69                 | 0.11 | 0.004  | 0.50                  | 0.21 | NS     | 0.91                 | 0.10  | 0.043  | 1.01                  | 0.07 | 0.003  | tensin 1                                                                                     | Mm00437205  | m1     | TDLA   |
| Ttk      | 22137   | 0.14                    | 0.34 | NS    | -1.49                | 0.77 | NS     | -0.49                 | 0.42 | NS     | 0.12                 | 0.23  | 0.311  | -0.44                 | 0.28 | NS     | tumor necrosis factor receptor superfamily, member 19                                        | Mm00555727  | m1     | TDLA   |
| Ubc      | 22190   | -0.34                   | 0.16 | NS    | 1.87                 | 0.15 | <0.001 | 2.08                  | 0.17 | <0.001 | 1.76                 | 0.09  | 0.889  | 1.91                  | 0.09 | 0.003  | ubiquitin C                                                                                  | Mm00485009  | m1     | Manual |

Supplemental Table S4. Transcript for transcription factors of putative 5'UTR (promoter) DNA binding sites with single nucleotide polymorphisms associated with candidate genes for chlorine-induced acute lung injury in mice

| Transcription Factor |  |  |  | Systematic |  |  |  | Systematic |  |  |  | C57BL/6J |  |  |  | C |  |  |  |
|----------------------|--|--|--|------------|--|--|--|------------|--|--|--|----------|--|--|--|----------|--|--|--|----------|--|--|--|----------|--|--|--|----------|--|--|--|----------|--|--|--|----------|--|--|--|----------|--|--|--|----------|--|--|--|----------|--|--|--|----------|--|--|--|----------|--|--|--|----------|--|--|--|----------|--|--|--|----------|--|--|--|----------|--|--|--|----------|--|--|--|----------|--|--|--|----------|--|--|--|----------|--|--|--|----------|--|--|--|----------|--|--|--|----------|--|--|--|----------|--|--|--|----------|--|--|--|----------|--|--|--|----------|--|--|--|----------|--|--|--|----------|--|--|--|----------|--|--|--|----------|--|--|--|----------|--|--|--|----------|--|--|--|----------|--|--|--|----------|--|--|--|----------|--|--|--|----------|--|--|--|----------|--|--|--|----------|--|--|--|----------|--|--|--|----------|--|--|--|----------|--|--|--|----------|--|--|--|----------|--|--|--|----------|--|--|--|----------|--|--|--|----------|--|--|--|----------|--|--|--|----------|--|--|--|----------|--|--|--|----------|--|--|--|----------|--|--|--|----------|--|--|--|----------|--|--|--|----------|--|--|--|----------|--|--|--|----------|--|--|--|----------|--|--|--|----------|--|--|--|----------|--|--|--|----------|--|--|--|----------|--|--|--|----------|--|--|--|----------|--|--|--|----------|--|--|--|----------|--|--|--|----------|--|--|--|----------|--|--|--|----------|--|--|--|----------|--|--|--|----------|--|--|--|----------|--|--|--|----------|--|--|--|----------|--|--|--|----------|--|--|--|----------|--|--|--|----------|--|--|--|----------|--|--|--|----------|--|--|--|----------|--|--|--|----------|--|--|--|----------|--|--|--|----------|--|--|--|----------|--|--|--|----------|--|--|--|----------|--|--|--|----------|--|--|--|----------|--|--|--|----------|--|--|--|----------|--|--|--|----------|--|--|--|----------|--|--|--|----------|--|--|--|----------|--|--|--|----------|--|--|--|----------|--|--|--|----------|--|--|--|----------|--|--|--|----------|--|--|--|----------|--|--|--|----------|--|--|--|----------|--|--|--|----------|--|--|--|----------|--|--|--|----------|--|--|--|----------|--|--|--|----------|--|--|--|----------|--|--|--|----------|--|--|--|----------|--|--|--|----------|--|--|--|----------|--|--|--|----------|--|--|--|----------|--|--|--|----------|--|--|--|----------|--|--|--|----------|--|--|--|----------|--|--|--|----------|--|--|--|----------|--|--|--|----------|--|--|--|----------|--|--|--|----------|--|--|--|----------|--|--|--|----------|--|--|--|----------|--|--|--|----------|--|--|--|----------|--|--|--|----------|--|--|--|----------|--|--|--|----------|--|--|--|----------|--|--|--|----------|--|--|--|----------|--|--|--|----------|--|--|--|----------|--|--|--|----------|--|--|--|----------|--|--|--|----------|--|--|--|----------|--|--|--|----------|--|--|--|----------|--|--|--|----------|--|--|--|----------|--|--|--|----------|--|--|--|----------|--|--|--|----------|--|--|--|----------|--|--|--|----------|--|--|--|----------|--|--|--|----------|--|--|--|----------|--|--|--|----------|--|--|--|----------|--|--|--|----------|--|--|--|----------|--|--|--|----------|--|--|--|----------|--|--|--|----------|--|--|--|----------|--|--|--|----------|--|--|--|----------|--|--|--|----------|--|--|--|----------|--|--|--|----------|--|--|--|----------|--|--|--|----------|--|--|--|----------|--|--|--|----------|--|--|--|----------|--|--|--|----------|--|--|--|----------|--|--|--|----------|--|--|--|----------|--|--|--|----------|--|--|--|----------|--|--|--|----------|--|--|--|----------|--|--|--|----------|--|--|--|----------|--|--|--|----------|--|--|--|----------|--|--|--|----------|--|--|--|----------|--|--|--|----------|--|--|--|----------|--|--|--|----------|--|--|--|----------|--|--|--|----------|--|--|--|----------|--|--|--|----------|--|--|--|----------|--|--|--|----------|--|--|--|----------|--|--|--|----------|--|--|--|----------|--|--|--|----------|--|--|--|----------|--|--|--|----------|--|--|--|----------|--|--|--|----------|--|--|--|----------|--|--|--|----------|--|--|--|----------|--|--|--|----------|--|--|--|----------|--|--|--|----------|--|--|--|----------|--|--|--|----------|--|--|--|----------|--|--|--|----------|--|--|--|----------|--|--|--|----------|--|--|--|----------|--|--|--|----------|--|--|--|----------|--|--|--|----------|--|--|--|----------|--|--|--|----------|--|--|--|----------|--|--|--|----------|--|--|--|----------|--|--|--|----------|--|--|--|----------|--|--|--|----------|--|--|--|----------|--|--|--|----------|--|--|--|----------|--|--|--|----------|--|--|--|----------|--|--|--|----------|--|--|--|----------|--|--|--|----------|--|--|--|----------|--|--|--|----------|--|--|--|----------|--|--|--|----------|--|--|--|----------|--|--|--|----------|--|--|--|----------|--|--|--|----------|--|--|--|----------|--|--|--|----------|--|--|--|----------|--|--|--|----------|--|--|--|----------|--|--|--|----------|--|--|--|----------|--|--|--|----------|--|--|--|----------|--|--|--|---|--|--|--|
|----------------------|--|--|--|------------|--|--|--|------------|--|--|--|----------|--|--|--|----------|--|--|--|----------|--|--|--|----------|--|--|--|----------|--|--|--|----------|--|--|--|----------|--|--|--|----------|--|--|--|----------|--|--|--|----------|--|--|--|----------|--|--|--|----------|--|--|--|----------|--|--|--|----------|--|--|--|----------|--|--|--|----------|--|--|--|----------|--|--|--|----------|--|--|--|----------|--|--|--|----------|--|--|--|----------|--|--|--|----------|--|--|--|----------|--|--|--|----------|--|--|--|----------|--|--|--|----------|--|--|--|----------|--|--|--|----------|--|--|--|----------|--|--|--|----------|--|--|--|----------|--|--|--|----------|--|--|--|----------|--|--|--|----------|--|--|--|----------|--|--|--|----------|--|--|--|----------|--|--|--|----------|--|--|--|----------|--|--|--|----------|--|--|--|----------|--|--|--|----------|--|--|--|----------|--|--|--|----------|--|--|--|----------|--|--|--|----------|--|--|--|----------|--|--|--|----------|--|--|--|----------|--|--|--|----------|--|--|--|----------|--|--|--|----------|--|--|--|----------|--|--|--|----------|--|--|--|----------|--|--|--|----------|--|--|--|----------|--|--|--|----------|--|--|--|----------|--|--|--|----------|--|--|--|----------|--|--|--|----------|--|--|--|----------|--|--|--|----------|--|--|--|----------|--|--|--|----------|--|--|--|----------|--|--|--|----------|--|--|--|----------|--|--|--|----------|--|--|--|----------|--|--|--|----------|--|--|--|----------|--|--|--|----------|--|--|--|----------|--|--|--|----------|--|--|--|----------|--|--|--|----------|--|--|--|----------|--|--|--|----------|--|--|--|----------|--|--|--|----------|--|--|--|----------|--|--|--|----------|--|--|--|----------|--|--|--|----------|--|--|--|----------|--|--|--|----------|--|--|--|----------|--|--|--|----------|--|--|--|----------|--|--|--|----------|--|--|--|----------|--|--|--|----------|--|--|--|----------|--|--|--|----------|--|--|--|----------|--|--|--|----------|--|--|--|----------|--|--|--|----------|--|--|--|----------|--|--|--|----------|--|--|--|----------|--|--|--|----------|--|--|--|----------|--|--|--|----------|--|--|--|----------|--|--|--|----------|--|--|--|----------|--|--|--|----------|--|--|--|----------|--|--|--|----------|--|--|--|----------|--|--|--|----------|--|--|--|----------|--|--|--|----------|--|--|--|----------|--|--|--|----------|--|--|--|----------|--|--|--|----------|--|--|--|----------|--|--|--|----------|--|--|--|----------|--|--|--|----------|--|--|--|----------|--|--|--|----------|--|--|--|----------|--|--|--|----------|--|--|--|----------|--|--|--|----------|--|--|--|----------|--|--|--|----------|--|--|--|----------|--|--|--|----------|--|--|--|----------|--|--|--|----------|--|--|--|----------|--|--|--|----------|--|--|--|----------|--|--|--|----------|--|--|--|----------|--|--|--|----------|--|--|--|----------|--|--|--|----------|--|--|--|----------|--|--|--|----------|--|--|--|----------|--|--|--|----------|--|--|--|----------|--|--|--|----------|--|--|--|----------|--|--|--|----------|--|--|--|----------|--|--|--|----------|--|--|--|----------|--|--|--|----------|--|--|--|----------|--|--|--|----------|--|--|--|----------|--|--|--|----------|--|--|--|----------|--|--|--|----------|--|--|--|----------|--|--|--|----------|--|--|--|----------|--|--|--|----------|--|--|--|----------|--|--|--|----------|--|--|--|----------|--|--|--|----------|--|--|--|----------|--|--|--|----------|--|--|--|----------|--|--|--|----------|--|--|--|----------|--|--|--|----------|--|--|--|----------|--|--|--|----------|--|--|--|----------|--|--|--|----------|--|--|--|----------|--|--|--|----------|--|--|--|----------|--|--|--|----------|--|--|--|----------|--|--|--|----------|--|--|--|----------|--|--|--|----------|--|--|--|----------|--|--|--|----------|--|--|--|----------|--|--|--|----------|--|--|--|----------|--|--|--|----------|--|--|--|----------|--|--|--|----------|--|--|--|----------|--|--|--|----------|--|--|--|----------|--|--|--|----------|--|--|--|----------|--|--|--|----------|--|--|--|----------|--|--|--|----------|--|--|--|----------|--|--|--|----------|--|--|--|----------|--|--|--|----------|--|--|--|----------|--|--|--|----------|--|--|--|----------|--|--|--|----------|--|--|--|----------|--|--|--|----------|--|--|--|----------|--|--|--|----------|--|--|--|----------|--|--|--|----------|--|--|--|----------|--|--|--|----------|--|--|--|----------|--|--|--|----------|--|--|--|----------|--|--|--|----------|--|--|--|----------|--|--|--|----------|--|--|--|----------|--|--|--|----------|--|--|--|----------|--|--|--|----------|--|--|--|----------|--|--|--|----------|--|--|--|----------|--|--|--|----------|--|--|--|----------|--|--|--|----------|--|--|--|----------|--|--|--|----------|--|--|--|----------|--|--|--|----------|--|--|--|----------|--|--|--|----------|--|--|--|----------|--|--|--|----------|--|--|--|----------|--|--|--|----------|--|--|--|----------|--|--|--|----------|--|--|--|----------|--|--|--|----------|--|--|--|---|--|--|--|

Supplemental Table S5. Transcriptome in the lung of sensitive (C57BL/6J) and resistant (C57BL/10J) mouse strains without or during chlorine-induced acute lung injury.

| EntrezID | Symbol | Differential Expression (Log2) |              |             |              |             |             |              |             |              |             | P Value                        |             |              | Description |                                                                                                 |
|----------|--------|--------------------------------|--------------|-------------|--------------|-------------|-------------|--------------|-------------|--------------|-------------|--------------------------------|-------------|--------------|-------------|-------------------------------------------------------------------------------------------------|
|          |        | vs. C57BL/10J at 0 h           |              |             |              |             | C57BLKS/J   |              |             |              |             | C57BLKS/J vs. C57BL/10J at 0 h |             |              |             |                                                                                                 |
|          |        | 6 h vs. 0 h                    | 12 h vs. 0 h | 6 h vs. 0 h | 12 h vs. 0 h | 6 h vs. 0 h | 6 h vs. 0 h | 12 h vs. 0 h | 6 h vs. 0 h | 12 h vs. 0 h | 6 h vs. 0 h | 12 h vs. 0 h                   | 6 h vs. 0 h | 12 h vs. 0 h | 6 h vs. 0 h |                                                                                                 |
| 55570    | Agpat1 | -1.00                          | 0.35         | 0.04        | -0.59        | -1.40       | 0.303       | 0.4567       | 0.0092      | 0.0094       | 0.0094      | 0.0094                         | 0.0094      | 0.0094       | 0.0094      | 1-acylglycerol-3-phosphate O-acyltransferase 1 (lysophosphatidic acid acyltransferase, alpha)   |
| 55579    | Agpat1 | -0.5                           | 0.05         | 0.14        | -0.34        | -0.68       | 0.5307      | 0.5307       | 0.184       | 0.0001       | 0.0001      | 0.0001                         | 0.0001      | 0.0001       | 0.0001      | 1-acylglycerol-3-phosphate O-acyltransferase 1 (lysophosphatidic acid acyltransferase, alpha)   |
| 57512    | Agpat2 | -0.45                          | -0.40        | -0.24       | 0.51         | 0.73        | 0.2358      | 0.2358       | 0.5455      | 0.0075       | 0.0075      | 0.0075                         | 0.0075      | 0.0075       | 0.0075      | 1-acylglycerol-3-phosphate O-acyltransferase 2 (lysophosphatidic acid acyltransferase, beta)    |
| 67162    | Agpat2 | 0.65                           | -0.60        | -0.22       | 0.53         | 0.64        | 0.2579      | 0.2579       | 0.4258      | 0.0029       | 0.0029      | 0.0029                         | 0.0029      | 0.0029       | 0.0029      | 1-acylglycerol-3-phosphate O-acyltransferase 2 (lysophosphatidic acid acyltransferase, beta)    |
| 28169    | Agpat3 | 0.16                           | 0.55         | 0.34        | 0.00         | 0.1         | 0.3888      | 0.3888       | 0.6076      | 0.0019       | 0.0019      | 0.0019                         | 0.0019      | 0.0019       | 0.0019      | 1-acylglycerol-3-phosphate O-acyltransferase 3                                                  |
| 68982    | Agpat4 | -0.69                          | 0.55         | -0.23       | -0.53        | -1.15       | 0.4121      | 0.4121       | 0.4888      | 0.3467       | 0.3467      | 0.3467                         | 0.3467      | 0.3467       | 0.3467      | 1-acylglycerol-3-phosphate O-acyltransferase 3                                                  |
| 68982    | Agpat4 | 0.02                           | 0.55         | -0.13       | -0.65        | -0.86       | 0.6866      | 0.6866       | 0.3718      | 0.0019       | 0.0019      | 0.0019                         | 0.0019      | 0.0019       | 0.0019      | 1-acylglycerol-3-phosphate O-acyltransferase 4 (lysophosphatidic acid acyltransferase, delta)   |
| 52123    | Agpat5 | 0.08                           | -0.1         | 0.12        | -0.07        | 0.07        | 0.5156      | 0.5156       | 0.3280      | 0.2044       | 0.2044      | 0.2044                         | 0.2044      | 0.2044       | 0.2044      | 1-acylglycerol-3-phosphate O-acyltransferase 5 (lysophosphatidic acid acyltransferase, epsilon) |
| 52123    | Agpat5 | 0.08                           | -0.1         | 0.12        | -0.07        | 0.07        | 0.6217      | 0.6217       | 0.3583      | 0.0090       | 0.0090      | 0.0090                         | 0.0090      | 0.0090       | 0.0090      | 1-acylglycerol-3-phosphate O-acyltransferase 5 (lysophosphatidic acid acyltransferase, epsilon) |
| 102247   | Agpat6 | -1.38                          | 0.25         | 0.30        | -0.28        | -0.24       | 0.2516      | 0.2516       | 0.4345      | 0.0090       | 0.0090      | 0.0090                         | 0.0090      | 0.0090       | 0.0090      | 1-acylglycerol-3-phosphate O-acyltransferase 6 (lysophosphatidic acid acyltransferase, zeta)    |
| 102247   | Agpat6 | -1.04                          | 0.06         | -0.28       | -0.04        | -0.66       | 0.6393      | 0.6393       | 0.3078      | 0.0095       | 0.0095      | 0.0095                         | 0.0095      | 0.0095       | 0.0095      | 1-acylglycerol-3-phosphate O-acyltransferase 6 (lysophosphatidic acid acyltransferase, zeta)    |
| 102247   | Agpat6 | 0.08                           | 0.06         | -0.28       | -0.04        | -0.66       | 0.6393      | 0.6393       | 0.3078      | 0.0095       | 0.0095      | 0.0095                         | 0.0095      | 0.0095       | 0.0095      | 1-acylglycerol-3-phosphate O-acyltransferase 6 (lysophosphatidic acid acyltransferase, zeta)    |
| 234510   | Agpat9 | 0.91                           | -0.25        | 0.23        | 0.04         | -0.23       | 0.2684      | 0.2684       | 0.5522      | 0.0094       | 0.0094      | 0.0094                         | 0.0094      | 0.0094       | 0.0094      | 1-acylglycerol-3-phosphate O-acyltransferase 9                                                  |
| 330270   | Acas   | -0.16                          | 0.02         | 0.22        | 0.12         | 0.1         | 0.2965      | 0.2965       | 0.5527      | 0.0094       | 0.0094      | 0.0094                         | 0.0094      | 0.0094       | 0.0094      | 1-acylglycerol-3-phosphate O-acyltransferase 9                                                  |
| 12183    | Bgn    | -0.22                          | 0.32         | 0.21        | -0.32        | -0.32       | 0.4478      | 0.4478       | 0.5527      | 0.0094       | 0.0094      | 0.0094                         | 0.0094      | 0.0094       | 0.0094      | 1-acylglycerol-3-phosphate O-acyltransferase 9                                                  |
| 12183    | Bgn    | 0.22                           | 0.32         | 0.21        | -0.32        | -0.32       | 0.3778      | 0.3778       | 0.4444      | 0.0094       | 0.0094      | 0.0094                         | 0.0094      | 0.0094       | 0.0094      | 1-acylglycerol-3-phosphate O-acyltransferase 9                                                  |
| 12183    | Bgn    | 0.22                           | 0.32         | 0.21        | -0.32        | -0.32       | 0.3778      | 0.3778       | 0.4444      | 0.0094       | 0.0094      | 0.0094                         | 0.0094      | 0.0094       | 0.0094      | 1-acylglycerol-3-phosphate O-acyltransferase 9                                                  |
| 12183    | Bgn    | 0.22                           | 0.32         | 0.21        | -0.32        | -0.32       | 0.3778      | 0.3778       | 0.4444      | 0.0094       | 0.0094      | 0.0094                         | 0.0094      | 0.0094       | 0.0094      | 1-acylglycerol-3-phosphate O-acyltransferase 9                                                  |
| 12183    | Bgn    | 0.22                           | 0.32         | 0.21        | -0.32        | -0.32       | 0.3778      | 0.3778       | 0.4444      | 0.0094       | 0.0094      | 0.0094                         | 0.0094      | 0.0094       | 0.0094      | 1-acylglycerol-3-phosphate O-acyltransferase 9                                                  |
| 12183    | Bgn    | 0.22                           | 0.32         | 0.21        | -0.32        | -0.32       | 0.3778      | 0.3778       | 0.4444      | 0.0094       | 0.0094      | 0.0094                         | 0.0094      | 0.0094       | 0.0094      | 1-acylglycerol-3-phosphate O-acyltransferase 9                                                  |
| 12183    | Bgn    | 0.22                           | 0.32         | 0.21        | -0.32        | -0.32       | 0.3778      | 0.3778       | 0.4444      | 0.0094       | 0.0094      | 0.0094                         | 0.0094      | 0.0094       | 0.0094      | 1-acylglycerol-3-phosphate O-acyltransferase 9                                                  |
| 12183    | Bgn    | 0.22                           | 0.32         | 0.21        | -0.32        | -0.32       | 0.3778      | 0.3778       | 0.4444      | 0.0094       | 0.0094      | 0.0094                         | 0.0094      | 0.0094       | 0.0094      | 1-acylglycerol-3-phosphate O-acyltransferase 9                                                  |
| 12183    | Bgn    | 0.22                           | 0.32         | 0.21        | -0.32        | -0.32       | 0.3778      | 0.3778       | 0.4444      | 0.0094       | 0.0094      | 0.0094                         | 0.0094      | 0.0094       | 0.0094      | 1-acylglycerol-3-phosphate O-acyltransferase 9                                                  |
| 12183    | Bgn    | 0.22                           | 0.32         | 0.21        | -0.32        | -0.32       | 0.3778      | 0.3778       | 0.4444      | 0.0094       | 0.0094      | 0.0094                         | 0.0094      | 0.0094       | 0.0094      | 1-acylglycerol-3-phosphate O-acyltransferase 9                                                  |
| 12183    | Bgn    | 0.22                           | 0.32         | 0.21        | -0.32        | -0.32       | 0.3778      | 0.3778       | 0.4444      | 0.0094       | 0.0094      | 0.0094                         | 0.0094      | 0.0094       | 0.0094      | 1-acylglycerol-3-phosphate O-acyltransferase 9                                                  |
| 12183    | Bgn    | 0.22                           | 0.32         | 0.21        | -0.32        | -0.32       | 0.3778      | 0.3778       | 0.4444      | 0.0094       | 0.0094      | 0.0094                         | 0.0094      | 0.0094       | 0.0094      | 1-acylglycerol-3-phosphate O-acyltransferase 9                                                  |
| 12183    | Bgn    | 0.22                           | 0.32         | 0.21        | -0.32        | -0.32       | 0.3778      | 0.3778       | 0.4444      | 0.0094       | 0.0094      | 0.0094                         | 0.0094      | 0.0094       | 0.0094      | 1-acylglycerol-3-phosphate O-acyltransferase 9                                                  |
| 12183    | Bgn    | 0.22                           | 0.32         | 0.21        | -0.32        | -0.32       | 0.3778      | 0.3778       | 0.4444      | 0.0094       | 0.0094      | 0.0094                         | 0.0094      | 0.0094       | 0.0094      | 1-acylglycerol-3-phosphate O-acyltransferase 9                                                  |
| 12183    | Bgn    | 0.22                           | 0.32         | 0.21        | -0.32        | -0.32       | 0.3778      | 0.3778       | 0.4444      | 0.0094       | 0.0094      | 0.0094                         | 0.0094      | 0.0094       | 0.0094      | 1-acylglycerol-3-phosphate O-acyltransferase 9                                                  |
| 12183    | Bgn    | 0.22                           | 0.32         | 0.21        | -0.32        | -0.32       | 0.3778      | 0.3778       | 0.4444      | 0.0094       | 0.0094      | 0.0094                         | 0.0094      | 0.0094       | 0.0094      | 1-acylglycerol-3-phosphate O-acyltransferase 9                                                  |
| 12183    | Bgn    | 0.22                           | 0.32         | 0.21        | -0.32        | -0.32       | 0.3778      | 0.3778       | 0.4444      | 0.0094       | 0.0094      | 0.0094                         | 0.0094      | 0.0094       | 0.0094      | 1-acylglycerol-3-phosphate O-acyltransferase 9                                                  |
| 12183    | Bgn    | 0.22                           | 0.32         | 0.21        | -0.32        | -0.32       | 0.3778      | 0.3778       | 0.4444      | 0.0094       | 0.0094      | 0.0094                         | 0.0094      | 0.0094       | 0.0094      | 1-acylglycerol-3-phosphate O-acyltransferase 9                                                  |
| 12183    | Bgn    | 0.22                           | 0.32         | 0.21        | -0.32        | -0.32       | 0.3778      | 0.3778       | 0.4444      | 0.0094       | 0.0094      | 0.0094                         | 0.0094      | 0.0094       | 0.0094      | 1-acylglycerol-3-phosphate O-acyltransferase 9                                                  |
| 12183    | Bgn    | 0.22                           | 0.32         | 0.21        | -0.32        | -0.32       | 0.3778      | 0.3778       | 0.4444      | 0.0094       | 0.0094      | 0.0094                         | 0.0094      | 0.0094       | 0.0094      | 1-acylglycerol-3-phosphate O-acyltransferase 9                                                  |
| 12183    | Bgn    | 0.22                           | 0.32         | 0.21        | -0.32        | -0.32       | 0.3778      | 0.3778       | 0.4444      | 0.0094       | 0.0094      | 0.0094                         | 0.0094      | 0.0094       | 0.0094      | 1-acylglycerol-3-phosphate O-acyltransferase 9                                                  |
| 12183    | Bgn    | 0.22                           | 0.32         | 0.21        | -0.32        | -0.32       | 0.3778      | 0.3778       | 0.4444      | 0.0094       | 0.0094      | 0.0094                         | 0.0094      | 0.0094       | 0.0094      | 1-acylglycerol-3-phosphate O-acyltransferase 9                                                  |
| 12183    | Bgn    | 0.22                           | 0.32         | 0.21        | -0.32        | -0.32       | 0.3778      | 0.3778       | 0.4444      | 0.0094       | 0.0094      | 0.0094                         | 0.0094      | 0.0094       | 0.0094      | 1-acylglycerol-3-phosphate O-acyltransferase 9                                                  |
| 12183    | Bgn    | 0.22                           | 0.32         | 0.21        | -0.32        | -0.32       | 0.3778      | 0.3778       | 0.4444      | 0.0094       | 0.0094      | 0.0094                         | 0.0094      | 0.0094       | 0.0094      | 1-acylglycerol-3-phosphate O-acyltransferase 9                                                  |
| 12183    | Bgn    | 0.22                           | 0.32         | 0.21        | -0.32        | -0.32       | 0.3778      | 0.3778       | 0.4444      | 0.0094       | 0.0094      | 0.0094                         | 0.0094      | 0.0094       | 0.0094      | 1-acylglycerol-3-phosphate O-acyltransferase 9                                                  |
| 12183    | Bgn    | 0.22                           | 0.32         | 0.21        | -0.32        | -0.32       | 0.3778      | 0.3778       | 0.4444      | 0.0094       | 0.0094      | 0.0094                         | 0.0094      | 0.0094       | 0.0094      | 1-acylglycerol-3-phosphate O-acyltransferase 9                                                  |
| 12183    | Bgn    | 0.22                           | 0.32         | 0.21        | -0.32        | -0.32       | 0.3778      | 0.3778       | 0.4444      | 0.0094       | 0.0094      | 0.0094                         | 0.0094      | 0.0094       | 0.0094      | 1-acylglycerol-3-phosphate O-acyltransferase 9                                                  |
| 12183    | Bgn    | 0.22                           | 0.32         | 0.21        | -0.32        | -0.32       | 0.3778      | 0.3778       | 0.4444      | 0.0094       | 0.0094      | 0.0094                         | 0.0094      | 0.0094       | 0.0094      | 1-acylglycerol-3-phosphate O-acyltransferase 9                                                  |
| 12183    | Bgn    | 0.22                           | 0.32         | 0.21        | -0.32        | -0.32       | 0.3778      | 0.3778       | 0.4444      | 0.0094       | 0.0094      | 0.0094                         | 0.0094      | 0.0094       | 0.0094      | 1-acylglycerol-3-phosphate O-acyltransferase 9                                                  |
| 12183    | Bgn    | 0.22                           | 0.32         | 0.21        | -0.32        | -0.32       | 0.3778      | 0.3          |             |              |             |                                |             |              |             |                                                                                                 |

|        |           |       |       |       |       |       |        |        |        |        |                                                                                                  |
|--------|-----------|-------|-------|-------|-------|-------|--------|--------|--------|--------|--------------------------------------------------------------------------------------------------|
| 236539 | Pgldh     | 0.27  | 0.14  | 0.19  | 0.07  | -0.39 | 0.4937 | 0.5387 | 0.4854 | 0.4936 | 0.1356 3-phosphoglycerate dehydrogenase                                                          |
| 18607  | Pgpk1     | -1.63 | 4.33  | 2.88  | -1.58 | -1.94 | 0.3734 | 0.0080 | 0.0646 | 0.1968 | 0.0755 3-phosphoinositide dependent protein kinase-1                                             |
| 18607  | Pgpk1     | 0.15  | -0.26 | -0.64 | -0.29 | -0.13 | 0.6651 | 0.2459 | 0.0551 | 0.1737 | 0.1918 3-phosphoinositide dependent protein kinase-1                                             |
| 18607  | Pgpk1     | -0.01 | 0.15  | -0.16 | -0.49 | -0.25 | 0.6979 | 0.6324 | 0.2181 | 0.0054 | 0.0405 3-phosphoinositide dependent protein kinase-1                                             |
| 268960 | Abat      | 0.09  | -0.47 | 0.04  | 0.44  | 0.80  | 0.5410 | 0.2937 | 0.0359 | 0.0359 | 0.0005 4-aminobutyrate aminotransferase                                                          |
| 268960 | Abat      | 0.01  | 0.05  | -0.01 | 0.06  | 0.01  | 0.6723 | 0.4534 | 0.6005 | 0.3121 | 0.4711 4-aminobutyrate aminotransferase                                                          |
| 242442 | Hpd       | 0.00  | 0.00  | 0.08  | -0.06 | -0.01 | 0.4363 | 0.5936 | 0.3997 | 0.3048 | 0.4704 4-hydroxyphenylpyruvate dioxygenase-like                                                  |
| 15445  | Hpd       | 0.00  | 0.00  | -0.11 | 0.32  | 0.31  | 0.6955 | 0.6082 | 0.3792 | 0.4051 | 0.2506 4-hydroxyphenylpyruvate dioxygenase                                                       |
| 18082  | Npsap1    | 0.24  | 0.24  | -0.18 | 0.05  | -0.08 | 0.4517 | 0.6215 | 0.2114 | 0.4051 | 0.2880 4-nitrophenylphosphate domain and non-neuronal SNAP25-like protein homolog 1 (C. elegans) |
| 15562  | Htr4      | 0.08  | 0.02  | 0.01  | 0.20  | 0.09  | 0.3918 | 0.6503 | 0.1279 | 0.2407 | 0.2660 5-hydroxytryptamine (serotonin) receptor 4                                                |
| 15562  | Htr4      | 0.00  | 0.02  | 0.01  | 0.00  | 0.02  | 0.7016 | 0.6224 | 0.6171 | 0.5560 | 0.4003 5-hydroxytryptamine (serotonin) receptor 4                                                |
| 23959  | Nt5e      | -0.36 | 0.13  | 0.19  | -0.24 | -0.01 | 0.3908 | 0.1593 | 0.2407 | 0.3195 | 0.4853 5'-nucleotidase, edc                                                                      |
| 23959  | Nt5e      | 0.23  | 0.12  | 0.31  | 0.30  | 0.88  | 0.4844 | 0.5864 | 0.5455 | 0.0234 | 0.0001 5'-nucleotidase, edc                                                                      |
| 107985 | Nt5f      | 0.22  | 0.01  | -0.18 | -0.06 | -0.25 | 0.5346 | 0.6499 | 0.2716 | 0.4860 | 0.1369 5-, 10-methyleneletrahydrofolate synthetase                                               |
| 17769  | Nt5f      | -0.18 | -0.04 | -0.10 | -0.11 | -0.14 | 0.3288 | 0.6023 | 0.5667 | 0.2736 | 0.1076 5-, 10-methyleneletrahydrofolate reductase                                                |
| 17769  | Nt5f      | -0.08 | -0.04 | -0.04 | 0.07  | -0.09 | 0.4742 | 0.5004 | 0.5979 | 0.3708 | 0.1524 5-, 10-methyleneletrahydrofolate reductase                                                |
| 17769  | Nt5f      | -0.60 | -0.28 | -0.28 | -0.32 | -0.09 | 0.5559 | 0.0507 | 0.2494 | 0.2090 | 0.3642 5-, 10-methyleneletrahydrofolate reductase                                                |
| 17769  | Nt5f      | 0.09  | 0.07  | 0.04  | 0.03  | 0.03  | 0.6177 | 0.6466 | 0.6030 | 0.4602 | 0.3874 5-, 10-methyleneletrahydrofolate reductase                                                |
| 50773  | Nt5c      | -0.95 | -0.18 | -0.54 | -0.64 | -1.06 | 0.3740 | 0.5773 | 0.3417 | 0.0228 | 0.0000 5'-3'-nucleotidase, cytosolic                                                             |
| 50773  | Nt5c      | 0.09  | -0.16 | -0.54 | -0.37 | -0.67 | 0.6130 | 0.2658 | 0.0319 | 0.0716 | 0.0051 5'-3'-nucleotidase, cytosolic                                                             |
| 103850 | Nt5m      | 0.00  | 0.27  | 0.05  | -0.13 | -0.01 | 0.7009 | 0.5432 | 0.5094 | 0.3404 | 0.4842 5'-3'-nucleotidase, mitochondrial                                                         |
| 24127  | Xm1       | 0.13  | 0.05  | 0.04  | -0.13 | 0.22  | 0.4052 | 0.4285 | 0.4872 | 0.1206 | 0.0182 5'-3'-xotinonuclease 1                                                                    |
| 24127  | Xm1       | -0.16 | -0.02 | 0.27  | 0.16  | 0.24  | 0.5692 | 0.4560 | 0.1490 | 0.3038 | 0.1806 5'-3'-xotinonuclease 1                                                                    |
| 24128  | Xm2       | -0.33 | -0.09 | 0.26  | 0.48  | 0.58  | 0.5891 | 0.4682 | 0.2700 | 0.0197 | 0.0081 5'-3'-xotinonuclease 2                                                                    |
| 24128  | Xm2       | 0.06  | -0.38 | -0.01 | 0.53  | 0.68  | 0.6801 | 0.6379 | 0.4420 | 0.0554 | 0.0085 5'-3'-xotinonuclease 2                                                                    |
| 108147 | Alic      | -0.21 | -0.31 | -0.76 | -0.32 | -0.69 | 0.6068 | 0.5926 | 0.4793 | 0.0708 | 0.0008 5-aminomizamide-4-carboxamide ribonucleotide formyltransferase/IMP cyclohydrolase         |
| 12009  | Az1       | -0.44 | 0.36  | -0.48 | -0.33 | -0.99 | 0.3308 | 0.3651 | 0.0490 | 0.0106 | 0.0008 5-azacytidine induced gene 1                                                              |
| 27215  | Az2       | -0.44 | -0.25 | -0.22 | -0.28 | -0.33 | 0.4792 | 0.5646 | 0.5337 | 0.0467 | 0.0100 5-azacytidine induced gene 2                                                              |
| 27215  | Az2       | 0.15  | -0.03 | 0.07  | 0.20  | 0.41  | 0.5464 | 0.5052 | 0.3769 | 0.1434 | 0.0135 5-azacytidine induced gene 2                                                              |
| 27215  | Az2       | -0.02 | -0.48 | -0.24 | 0.04  | 0.12  | 0.6941 | 0.5429 | 0.5932 | 0.5015 | 0.3048 5-azacytidine induced gene 2                                                              |
| 15550  | Htr1a     | -0.02 | -0.02 | -0.03 | -0.01 | 0.04  | 0.6433 | 0.6284 | 0.5663 | 0.5179 | 0.3364 5-hydroxytryptamine (serotonin) receptor 1A                                               |
| 15551  | Htr1b     | -0.06 | 0.02  | 0.02  | -0.02 | -0.07 | 0.5179 | 0.5668 | 0.5689 | 0.4982 | 0.2433 5-hydroxytryptamine (serotonin) receptor 1B                                               |
| 15552  | Htr1d     | -0.11 | -0.01 | 0.16  | -0.05 | -0.05 | 0.4805 | 0.4159 | 0.5847 | 0.4917 | 0.2038 5-hydroxytryptamine (serotonin) receptor 1D                                               |
| 15557  | Htr1f     | -0.11 | 0.02  | 0.21  | -0.28 | -0.30 | 0.5845 | 0.4584 | 0.5975 | 0.0640 | 0.0430 5-hydroxytryptamine (serotonin) receptor 1F                                               |
| 15558  | Htr2a     | -0.06 | 0.04  | 0.07  | -0.04 | -0.03 | 0.5139 | 0.4349 | 0.5161 | 0.4409 | 0.3821 5-hydroxytryptamine (serotonin) receptor 2A                                               |
| 15559  | Htr2b     | 0.19  | -0.05 | -0.26 | -0.01 | -0.09 | 0.2835 | 0.6480 | 0.0726 | 0.4409 | 0.2187 5-hydroxytryptamine (serotonin) receptor 2B                                               |
| 15559  | Htr2b     | 0.29  | 0.33  | -0.21 | 0.02  | -0.02 | 0.3204 | 0.4175 | 0.5246 | 0.5246 | 0.2175 5-hydroxytryptamine (serotonin) receptor 2B                                               |
| 15560  | Htr2c     | 0.04  | -0.14 | -0.09 | 0.00  | -0.07 | 0.5887 | 0.2184 | 0.4579 | 0.5631 | 0.4149 5-hydroxytryptamine (serotonin) receptor 2C                                               |
| 15560  | Htr2c     | 0.02  | 0.06  | 0.10  | 0.07  | 0.03  | 0.6591 | 0.6002 | 0.5847 | 0.5200 | 0.2055 5-hydroxytryptamine (serotonin) receptor 2C                                               |
| 15561  | Htr3a     | 0.03  | -0.06 | 0.03  | 0.09  | 0.07  | 0.6082 | 0.5499 | 0.2825 | 0.2879 | 0.4478 5-hydroxytryptamine (serotonin) receptor 3A                                               |
| 57014  | Htr3b     | 0.05  | -0.06 | 0.00  | -0.07 | -0.02 | 0.3153 | 0.3722 | 0.5828 | 0.3153 | 0.2067 5-hydroxytryptamine (serotonin) receptor 3B                                               |
| 15563  | Htr5a     | 0.30  | 0.07  | 0.05  | 0.08  | -0.01 | 0.4277 | 0.4855 | 0.4538 | 0.3853 | 0.3756 5-hydroxytryptamine (serotonin) receptor 3C                                               |
| 15564  | Htr5b     | -0.03 | 0.04  | 0.02  | 0.00  | 0.04  | 0.6201 | 0.6533 | 0.6075 | 0.5621 | 0.3465 5-hydroxytryptamine (serotonin) receptor 5A                                               |
| 15565  | Htr6      | 0.10  | -0.12 | -0.08 | -0.01 | -0.04 | 0.4937 | 0.3746 | 0.4661 | 0.5346 | 0.4046 5-hydroxytryptamine (serotonin) receptor 5B                                               |
| 15566  | Htr7      | -0.07 | 0.09  | 0.05  | -0.04 | -0.09 | 0.5710 | 0.4867 | 0.6002 | 0.4960 | 0.2850 5-hydroxytryptamine (serotonin) receptor 7                                                |
| 238505 | Mtr       | -0.31 | 0.33  | 0.03  | -0.31 | -0.42 | 0.3633 | 0.3976 | 0.5258 | 0.0206 | 0.0221 5-methyltetrahydrofolate-homo-cysteine methyltransferase                                  |
| 238505 | Mtr       | -0.13 | -0.36 | -0.26 | 0.00  | -0.19 | 0.6008 | 0.5388 | 0.6220 | 0.4692 | 0.1822 5-methyltetrahydrofolate-homo-cysteine methyltransferase                                  |
| 21009  | Mtrr      | 0.20  | -0.01 | 0.00  | 0.15  | 0.03  | 0.3677 | 0.4539 | 0.4014 | 0.1370 | 0.1822 5-methyltetrahydrofolate-homo-cysteine methyltransferase reductase                        |
| 21009  | Mtrr      | 0.00  | 0.00  | 0.00  | 0.00  | -0.03 | 0.5590 | 0.5059 | 0.5875 | 0.5517 | 0.3789 5-methyltetrahydrofolate-homo-cysteine methyltransferase reductase                        |
| 21009  | Mtrr      | -0.03 | 0.23  | 0.03  | 0.12  | 0.02  | 0.3908 | 0.3908 | 0.4975 | 0.5206 | 0.4683 5-methyltetrahydrofolate-homo-cysteine methyltransferase reductase                        |
| 319638 | N5dc1     | 0.23  | 0.00  | -0.02 | 0.13  | -0.01 | 0.6608 | 0.3908 | 0.5567 | 0.2206 | 0.0759 5'-nucleotidase domain containing 1                                                       |
| 319638 | N5dc1     | 0.05  | -0.37 | -0.26 | 0.20  | 0.52  | 0.6641 | 0.5168 | 0.5919 | 0.2226 | 0.0105 5'-nucleotidase domain containing 1                                                       |
| 70021  | N5dc2     | 0.12  | -0.37 | 0.04  | 0.32  | 0.45  | 0.5768 | 0.2225 | 0.6217 | 0.2653 | 0.0336 5'-nucleotidase domain containing 2                                                       |
| 103466 | N5dc3     | -0.13 | 0.13  | -0.07 | -0.37 | -0.54 | 0.5944 | 0.6242 | 0.4589 | 0.1649 | 0.0315 5'-nucleotidase domain containing 3                                                       |
| 70881  | N5c1b     | 0.05  | -0.02 | -0.07 | 0.02  | -0.01 | 0.5982 | 0.6039 | 0.3640 | 0.5196 | 0.4674 5'-nucleotidase, cytosolic IB                                                             |
| 70881  | N5c1b     | 0.01  | 0.01  | 0.13  | 0.04  | 0.01  | 0.6880 | 0.6388 | 0.1691 | 0.4359 | 0.4750 5'-nucleotidase, cytosolic IB                                                             |
| 76952  | N5c2      | -0.50 | 1.22  | 0.76  | 0.13  | 0.16  | 0.1466 | 0.0049 | 0.0062 | 0.2819 | 0.2133 5'-nucleotidase, cytosolic II                                                             |
| 76952  | N5c2      | 0.12  | 0.54  | 0.68  | 0.51  | 1.25  | 0.5434 | 0.2021 | 0.0382 | 0.0009 | 0.0004 5'-nucleotidase, cytosolic II                                                             |
| 76952  | N5c2      | 0.07  | 0.35  | 1.01  | 0.92  | 1.25  | 0.6496 | 0.4001 | 0.0317 | 0.0061 | 0.0002 5'-nucleotidase, cytosolic II                                                             |
| 107569 | N5c3      | 0.41  | -0.43 | -0.29 | 0.07  | 0.19  | 0.2913 | 0.1637 | 0.2642 | 0.4872 | 0.2633 5'-nucleotidase, cytosolic III                                                            |
| 68106  | N5c3l     | 0.32  | -0.26 | -0.49 | -0.32 | -0.27 | 0.3946 | 0.1999 | 0.0372 | 0.1284 | 0.1311 5'-nucleotidase, cytosolic III                                                            |
| 75475  | Oplah     | 0.04  | -0.08 | -0.06 | -0.02 | 0.11  | 0.6212 | 0.6224 | 0.6424 | 0.5271 | 0.1577 5'-nucleotidase, cytosolic III-like                                                       |
| 665931 | LOC665931 | -0.08 | 0.00  | 0.05  | -0.16 | -0.18 | 0.5518 | 0.6332 | 0.5886 | 0.1881 | 0.3525 5-oxoprolinase (ATP-hydrolysing)                                                          |
| 18639  | Ptkb1     | -0.43 | -0.15 | 0.30  | 0.53  | 0.41  | 0.5115 | 0.5197 | 0.2834 | 0.1118 | 0.0915 60S acidic ribosomal protein P2-like                                                      |
| 18640  | Ptkb2     | 0.59  | 0.06  | -0.31 | 0.38  | 0.44  | 0.1358 | 0.6286 | 0.1742 | 0.0699 | 0.1100 6-phosphofructo-2-kinase/fructose-2,6-biphosphatase 1                                     |
| 18640  | Ptkb2     | 0.21  | -0.09 | -0.01 | -0.12 | 0.00  | 0.4358 | 0.3116 | 0.4077 | 0.2233 | 0.0149 6-phosphofructo-2-kinase/fructose-2,6-biphosphatase 2                                     |

|         |        |       |         |       |       |         |        |        |        |                                                                                                    |                                                      |
|---------|--------|-------|---------|-------|-------|---------|--------|--------|--------|----------------------------------------------------------------------------------------------------|------------------------------------------------------|
| 13524   | Adam18 | 0.04  | -0.01   | 0.03  | 0.04  | 0.00    | 0.5916 | 0.5385 | 0.6410 | 0.4382                                                                                             | 0.4932 a disintegrin and metalloproteinase domain 18 |
| Adam19  | -0.64  | -0.71 | -0.63   | -1.20 | 0.00  | 0.1418  | 0.3965 | 0.0082 | 0.0028 | 0.0001 a disintegrin and metalloproteinase domain 19 (meltrin beta)                                |                                                      |
| Adam19  | 0.24   | -0.43 | -0.10   | -0.66 | -0.10 | 0.04249 | 0.0750 | 0.0025 | 0.3914 | 0.0069 a disintegrin and metalloproteinase domain 19 (meltrin beta)                                |                                                      |
| Adam19  | 0.04   | -0.04 | -0.14   | -0.11 | -0.11 | 0.0566  | 0.4581 | 0.3516 | 0.1963 | 0.1236 a disintegrin and metalloproteinase domain 19 (meltrin beta)                                |                                                      |
| 280668  | Adam1a | -0.68 | -0.05   | -0.19 | -0.31 | 0.1208  | 0.5030 | 0.6303 | 0.0632 | 0.0482 a disintegrin and metalloproteinase domain 1a                                               |                                                      |
| 280667  | Adam1b | -0.11 | 0.11    | 0.06  | -0.02 | 0.4477  | 0.4350 | 0.5372 | 0.2915 | 0.4215 a disintegrin and metalloproteinase domain 1b                                               |                                                      |
| 280667  | Adam1b | 0.06  | 0.00    | 0.05  | 0.09  | 0.5107  | 0.6080 | 0.5422 | 0.2602 | 0.0673 a disintegrin and metalloproteinase domain 1b                                               |                                                      |
| Adam1b  | 0.01   | -0.06 | 0.00    | -0.02 | -0.02 | 0.6892  | 0.4006 | 0.6301 | 0.5250 | 0.4257 a disintegrin and metalloproteinase domain 1b                                               |                                                      |
| Adam2   | 0.03   | -0.09 | -0.03   | 0.03  | 0.03  | 0.6217  | 0.4877 | 0.6423 | 0.4715 | 0.4546 a disintegrin and metalloproteinase domain 2                                                |                                                      |
| Adam21  | 0.03   | 0.18  | 0.03    | 0.22  | 0.22  | 0.6643  | 0.5984 | 0.5755 | 0.4067 | 0.0312 a disintegrin and metalloproteinase domain 21                                               |                                                      |
| Adam22  | -0.01  | 0.02  | 0.00    | -0.04 | -0.04 | 0.6644  | 0.6498 | 0.5903 | 0.4293 | 0.3481 a disintegrin and metalloproteinase domain 22                                               |                                                      |
| Adam22  | -0.39  | -0.05 | -0.01   | -0.19 | -0.05 | 0.0729  | 0.4073 | 0.5689 | 0.1474 | 0.3895 a disintegrin and metalloproteinase domain 23                                               |                                                      |
| Adam23  | 0.14   | 0.03  | 0.01    | 0.08  | 0.11  | 0.2446  | 0.6448 | 0.5910 | 0.2047 | 0.0784 a disintegrin and metalloproteinase domain 23                                               |                                                      |
| Adam23  | 0.03   | -0.15 | -0.13   | 0.01  | -0.06 | 0.4855  | 0.3024 | 0.1401 | 0.5492 | 0.4051 a disintegrin and metalloproteinase domain 23 (testase 1)                                   |                                                      |
| Adam24  | -0.03  | -0.05 | -0.03   | -0.10 | -0.01 | 0.6220  | 0.5003 | 0.5568 | 0.1429 | 0.4709 a disintegrin and metalloproteinase domain 25 (testase 2)                                   |                                                      |
| Adam25  | -0.03  | 0.05  | 0.02    | -0.05 | -0.05 | 0.6217  | 0.5622 | 0.6095 | 0.3383 | 0.2934 a disintegrin and metalloproteinase domain 25 (testase 2)                                   |                                                      |
| Adam25  | -0.01  | -0.46 | 0.09    | 0.06  | 0.09  | 0.6797  | 0.4086 | 0.3735 | 0.3670 | 0.2197 a disintegrin and metalloproteinase domain 26A (testase 3)                                  |                                                      |
| Adam25  | -0.10  | -0.41 | 0.01    | -0.15 | -0.17 | 0.4287  | 0.6042 | 0.6240 | 0.1149 | 0.0415 a disintegrin and metalloproteinase domain 26A (testase 3)                                  |                                                      |
| Adam26a | -0.02  | -0.02 | 0.04    | -0.03 | -0.01 | 0.6587  | 0.4089 | 0.5622 | 0.4806 | 0.4624 a disintegrin and metalloproteinase domain 26A (testase 3)                                  |                                                      |
| Adam26a | -0.01  | 0.05  | 0.06    | -0.03 | -0.06 | 0.6682  | 0.6330 | 0.6027 | 0.4324 | 0.2655 a disintegrin and metalloproteinase domain 26A (testase 3)                                  |                                                      |
| Adam28  | 0.36   | -0.45 | -0.49   | -0.31 | -0.29 | 0.2229  | 0.0689 | 0.0884 | 0.0155 | 0.0386 a disintegrin and metalloproteinase domain 28                                               |                                                      |
| Adam28  | -0.10  | 0.11  | 0.07    | -0.02 | -0.01 | 0.4178  | 0.2124 | 0.2851 | 0.4920 | 0.4721 a disintegrin and metalloproteinase domain 28                                               |                                                      |
| Adam28  | 0.09   | -0.06 | 0.08    | 0.13  | 0.09  | 0.4711  | 0.4615 | 0.5496 | 0.1015 | 0.2314 a disintegrin and metalloproteinase domain 28                                               |                                                      |
| Adam29  | -0.02  | 0.03  | -0.05   | 0.00  | 0.03  | 0.6475  | 0.4992 | 0.5999 | 0.5559 | 0.3778 a disintegrin and metalloproteinase domain 29                                               |                                                      |
| Adam29  | 0.02   | 0.01  | -0.05   | -0.03 | 0.06  | 0.6578  | 0.5784 | 0.5845 | 0.4728 | 0.2918 a disintegrin and metalloproteinase domain 29                                               |                                                      |
| Adam30  | 0.05   | -0.08 | -0.22   | -0.10 | -0.17 | 0.2869  | 0.6132 | 0.3101 | 0.3005 | 0.0154 a disintegrin and metalloproteinase domain 30                                               |                                                      |
| Adam30  | 0.17   | 0.05  | 0.18    | 0.20  | 0.21  | 0.4717  | 0.5944 | 0.1135 | 0.1870 | 0.0136 a disintegrin and metalloproteinase domain 30                                               |                                                      |
| Adam32  | 0.11   | 0.11  | 0.29    | 0.20  | 0.20  | 0.6246  | 0.2680 | 0.5528 | 0.4579 | 0.3581 a disintegrin and metalloproteinase domain 32                                               |                                                      |
| Adam32  | -0.03  | 0.09  | 0.00    | 0.03  | 0.04  | 0.3993  | 0.6320 | 0.5438 | 0.3559 | 0.0088 a disintegrin and metalloproteinase domain 32                                               |                                                      |
| Adam33  | -0.24  | -0.13 | -0.07   | -0.08 | -0.30 | 0.4919  | 0.6258 | 0.3857 | 0.3611 | 0.4380 a disintegrin and metalloproteinase domain 33                                               |                                                      |
| Adam33  | -0.16  | -0.12 | -0.02   | 0.07  | 0.02  | 0.5168  | 0.0722 | 0.0351 | 0.0087 | 0.0011 a disintegrin and metalloproteinase domain 33                                               |                                                      |
| Adam33  | 0.16   | -0.36 | -0.61   | -0.76 | -0.85 | 0.5745  | 0.3356 | 0.1440 | 0.0064 | 0.0253 a disintegrin and metalloproteinase domain 4                                                |                                                      |
| Adam4   | -0.07  | -0.18 | -0.25   | -0.30 | -0.21 | 0.5160  | 0.5245 | 0.6360 | 0.3946 | 0.4538 a disintegrin and metalloproteinase domain 5                                                |                                                      |
| Adam5   | -0.05  | -0.01 | -0.03   | -0.06 | -0.10 | 0.5960  | 0.6093 | 0.6370 | 0.5445 | 0.2018 a disintegrin and metalloproteinase domain 5                                                |                                                      |
| Adam5   | 0.09   | -0.05 | -0.12   | -0.01 | -0.01 | 0.4973  | 0.3689 | 0.6370 | 0.3945 | 0.4746 a disintegrin and metalloproteinase domain 6                                                |                                                      |
| Adam6   | -0.12  | -0.03 | -0.10   | -0.02 | 0.12  | 0.2462  | 0.3358 | 0.5932 | 0.1129 | 0.0016 a disintegrin and metalloproteinase domain 7                                                |                                                      |
| Adam7   | 0.15   | -0.10 | -0.02   | 0.10  | 0.45  | 0.4839  | 0.3550 | 0.3449 | 0.0589 | 0.0191 a disintegrin and metalloproteinase domain 8                                                |                                                      |
| Adam7   | -0.70  | 0.18  | 0.10    | 0.45  | 0.82  | 0.1245  | 0.1715 | 0.5301 | 0.1625 | 0.0060 a disintegrin and metalloproteinase domain 9 (meltrin gamma)                                |                                                      |
| Adam9   | 0.77   | -0.45 | -0.07   | 0.38  | 0.92  | 0.6144  | 0.0461 | 0.0045 | 0.0235 | 0.0028 a disintegrin-like and metalloproteinase (repsyn type) with thrombospondin type 1 motif, 1  |                                                      |
| Adam11  | -0.12  | 1.30  | 1.80    | 0.90  | 1.05  | 0.6510  | 0.0379 | 0.0101 | 0.0523 | 0.0029 a disintegrin-like and metalloproteinase (repsyn type) with thrombospondin type 1 motif, 1  |                                                      |
| Adam11  | -0.09  | 0.16  | 2.04    | 0.54  | 0.69  | 0.1231  | 0.1438 | 0.6253 | 0.1456 | 0.0079 a disintegrin-like and metalloproteinase (repsyn type) with thrombospondin type 1 motif, 10 |                                                      |
| Adam10  | 0.36   | -0.16 | 0.04    | 0.18  | 0.23  | 0.5497  | 0.5311 | 0.5455 | 0.2107 | 0.0063 a disintegrin-like and metalloproteinase (repsyn type) with thrombospondin type 1 motif, 10 |                                                      |
| Adam10  | -0.15  | 0.00  | 0.21    | -0.20 | -0.59 | 0.6697  | 0.4412 | 0.5711 | 0.3049 | 0.4581 a disintegrin-like and metalloproteinase (repsyn type) with thrombospondin type 1 motif, 10 |                                                      |
| Adam10  | -0.03  | -0.51 | -0.13   | 0.18  | -0.10 | 0.6886  | 0.5311 | 0.1476 | 0.1858 | 0.2357 a disintegrin-like and metalloproteinase (repsyn type) with thrombospondin type 1 motif, 12 |                                                      |
| Adam12  | -0.16  | 0.12  | 0.18    | -0.11 | -0.10 | 0.3189  | 0.1476 | 0.4868 | 0.2927 | 0.3488 a disintegrin-like and metalloproteinase (repsyn type) with thrombospondin type 1 motif, 12 |                                                      |
| Adam12  | 0.00   | -0.07 | -0.02   | -0.04 | -0.04 | 0.6984  | 0.3335 | 0.4868 | 0.6155 | 0.3510 a disintegrin-like and metalloproteinase (repsyn type) with thrombospondin type 1 motif, 13 |                                                      |
| Adam13  | -0.02  | 0.02  | -0.02   | -0.04 | 0.04  | 0.6503  | 0.5201 | 0.6155 | 0.5177 | 0.1815 a disintegrin-like and metalloproteinase (repsyn type) with thrombospondin type 1 motif, 14 |                                                      |
| Adam14  | 0.04   | -0.06 | 0.02    | 0.01  | 0.09  | 0.5848  | 0.4593 | 0.6333 | 0.5058 | 0.0035 a disintegrin-like and metalloproteinase (repsyn type) with thrombospondin type 1 motif, 14 |                                                      |
| Adam14  | 0.02   | 0.01  | 0.15    | -0.03 | -0.21 | 0.6847  | 0.4756 | 0.6333 | 0.0002 | 0.0000 a disintegrin-like and metalloproteinase (repsyn type) with thrombospondin type 1 motif, 15 |                                                      |
| Adam15  | -0.66  | 2.33  | 0.08    | 1.52  | 1.03  | 0.1485  | 0.0003 | 0.0002 | 0.0002 | 0.4027 a disintegrin-like and metalloproteinase (repsyn type) with thrombospondin type 1 motif, 15 |                                                      |
| Adam16  | -0.08  | 0.08  | 0.12    | 0.03  | 0.01  | 0.5102  | 0.4633 | 0.3882 | 0.4821 | 0.4021 a disintegrin-like and metalloproteinase (repsyn type) with thrombospondin type 1 motif, 16 |                                                      |
| Adam16  | -0.02  | -0.02 | 0.00    | 0.03  | 0.03  | 0.6640  | 0.6457 | 0.5469 | 0.4617 | 0.2118 a disintegrin-like and metalloproteinase (repsyn type) with thrombospondin type 1 motif, 16 |                                                      |
| Adam18  | 0.03   | 0.10  | 0.06    | -0.03 | -0.09 | 0.6761  | 0.5736 | 0.4982 | 0.4809 | 0.3668 a disintegrin-like and metalloproteinase (repsyn type) with thrombospondin type 1 motif, 18 |                                                      |
| Adam18  | 0.00   | 0.03  | 0.00    | 0.03  | 0.03  | 0.7035  | 0.5903 | 0.5147 | 0.4486 | 0.4371 a disintegrin-like and metalloproteinase (repsyn type) with thrombospondin type 1 motif, 18 |                                                      |
| Adam19  | -0.10  | 0.07  | 0.06    | -0.05 | -0.02 | 0.4475  | 0.3470 | 0.4306 | 0.4376 | 0.3148 a disintegrin-like and metalloproteinase (repsyn type) with thrombospondin type 1 motif, 19 |                                                      |
| Adam19  | 0.09   | -0.08 | -0.07   | 0.08  | -0.05 | 0.4455  | 0.3685 | 0.3496 | 0.2255 | 0.1034 a disintegrin-like and metalloproteinase (repsyn type) with thrombospondin type 1 motif, 19 |                                                      |
| Adam19  | -0.06  | -0.03 | 0.05    | 0.06  | 0.12  | 0.5364  | 0.6409 | 0.3778 | 0.1130 | 0.0003 a disintegrin-like and metalloproteinase (repsyn type) with thrombospondin type 1 motif, 2  |                                                      |
| Adam21  | 0.25   | -0.13 | 0.39    | 0.40  | 0.81  | 0.3554  | 0.4867 | 0.0259 | 0.0616 | 0.0028 a disintegrin-like and metalloproteinase (repsyn type) with thrombospondin type 1 motif, 2  |                                                      |
| Adam22  | -0.14  | 0.07  | 0.66    | 0.41  | 0.66  | 0.5760  | 0.6639 | 0.6050 | 0.0014 | 0.0038 a disintegrin-like and metalloproteinase (repsyn type) with thrombospondin type 1 motif, 2  |                                                      |
| Adam22  | 0.05   | 0.09  | 1.18    | 0.46  | 0.73  | 0.6766  | 0.4423 | 0.6338 | 0.1004 | 0.0261 a disintegrin-like and metalloproteinase (repsyn type) with thrombospondin type 1 motif, 2  |                                                      |
| Adam22  | 0.01   | -0.03 | 0.01    | -0.15 | -0.18 | 0.4905  | 0.3961 | 0.1050 | 0.3793 | 0.4187 a disintegrin-like and metalloproteinase (repsyn type) with thrombospondin type 1 motif, 20 |                                                      |
| Adam20  | -0.06  | 0.12  | 0.24    | -0.02 | 0.04  | 0.6758  | 0.4751 | 0.5555 | 0.4767 | 0.2351 a disintegrin-like and metalloproteinase (repsyn type) with thrombospondin type 1 motif, 20 |                                                      |
| Adam20  | 0.04   | 0.07  | -0.02   | 0.00  | 0.00  | 0.5798  | 0.5989 | 0.6364 | 0.5331 | 0.4938 a disintegrin-like and metalloproteinase (repsyn type) with thrombospondin type 1 motif, 20 |                                                      |
| Adam20  | -0.01  | 0.02  | 0.00    | 0.00  | -0.06 | 0.6730  | 0.5989 | 0.6364 | 0.5331 | 0.2351 a disintegrin-like and metalloproteinase (repsyn type) with thrombospondin type 1 motif, 3  |                                                      |
| Adam20  | 0.17   | -0.16 | -0.11</ |       |       |         |        |        |        |                                                                                                    |                                                      |

|        |        |       |       |       |       |       |        |        |        |        |                                                                                                                                     |
|--------|--------|-------|-------|-------|-------|-------|--------|--------|--------|--------|-------------------------------------------------------------------------------------------------------------------------------------|
| 75547  | Alap13 | -0.19 | 1.08  | 1.52  | 0.39  | 0.84  | 0.5721 | 0.0566 | 0.0062 | 0.1029 | 0.0063 A kinase (PRKA) anchor protein 13                                                                                            |
| 75547  | Alap13 | -0.03 | 0.13  | 0.20  | 0.49  | 0.44  | 0.6377 | 0.2225 | 0.1373 | 0.0190 | 0.0025 A kinase (PRKA) anchor protein 13                                                                                            |
| 75547  | Alap13 | -0.05 | 0.56  | 0.60  | 0.31  | 0.95  | 0.6568 | 0.3669 | 0.0753 | 0.2306 | 0.0136 A kinase (PRKA) anchor protein 13                                                                                            |
| 75547  | Alap13 | -0.03 | 0.51  | 0.66  | 0.09  | 0.99  | 0.6673 | 0.3937 | 0.2633 | 0.0416 | 0.2845 A kinase (PRKA) anchor protein 13                                                                                            |
| 434756 | Alap14 | -0.01 | -0.40 | -0.81 | -0.31 | -0.58 | 0.6991 | 0.6208 | 0.2744 | 0.0420 | 0.0014 A kinase (PRKA) anchor protein 14                                                                                            |
| 11641  | Alap2  | 0.82  | 0.14  | 0.67  | 1.22  | 1.45  | 0.1029 | 0.6284 | 0.1899 | 0.0004 | 0.0000 A kinase (PRKA) anchor protein 2                                                                                             |
| 11641  | Alap2  | 0.28  | 1.82  | 2.80  | 2.11  | 2.52  | 0.5142 | 0.0162 | 0.0007 | 0.0000 | 0.0000 A kinase (PRKA) anchor protein 2                                                                                             |
| 11641  | Alap2  | -0.04 | 0.35  | 0.62  | 0.16  | 0.20  | 0.6675 | 0.3462 | 0.0077 | 0.3176 | 0.1608 A kinase (PRKA) anchor protein 2                                                                                             |
| 11642  | Alap3  | 0.08  | 0.01  | 0.13  | 0.04  | -0.03 | 0.5801 | 0.4918 | 0.6024 | 0.4673 | 0.4259 A kinase (PRKA) anchor protein 3                                                                                             |
| 11643  | Alap3  | 0.06  | 0.06  | -0.04 | -0.01 | 0.02  | 0.5113 | 0.5061 | 0.5105 | 0.5448 | 0.4214 A kinase (PRKA) anchor protein 4                                                                                             |
| 238276 | Alap5  | -0.28 | 0.27  | -0.03 | 0.03  | -0.28 | 0.3541 | 0.3846 | 0.4803 | 0.5260 | 0.1251 A kinase (PRKA) anchor protein 5                                                                                             |
| 238161 | Alap6  | -0.04 | -0.01 | -0.07 | -0.03 | -0.10 | 0.5787 | 0.6190 | 0.4820 | 0.4502 | 0.1541 A kinase (PRKA) anchor protein 6                                                                                             |
| 238161 | Alap6  | -0.06 | -0.24 | -0.35 | 0.14  | -0.34 | 0.6169 | 0.4168 | 0.1642 | 0.4174 | 0.0349 A kinase (PRKA) anchor protein 6                                                                                             |
| 432442 | Alap7  | 0.48  | -0.09 | -0.11 | 0.16  | 0.36  | 0.2236 | 0.3338 | 0.2780 | 0.1189 | 0.0063 A kinase (PRKA) anchor protein 7                                                                                             |
| 432442 | Alap7  | 0.08  | -0.03 | -0.01 | -0.01 | 0.08  | 0.4443 | 0.6508 | 0.5185 | 0.5467 | 0.1605 A kinase (PRKA) anchor protein 7                                                                                             |
| 56399  | Alap8  | 0.30  | -0.04 | -0.08 | 0.00  | 0.10  | 0.3244 | 0.4759 | 0.2975 | 0.5622 | 0.2852 A kinase (PRKA) anchor protein 8                                                                                             |
| 56399  | Alap8  | 0.26  | -0.04 | -0.18 | 0.00  | 0.10  | 0.3407 | 0.3735 | 0.1146 | 0.3104 | 0.3778 A kinase (PRKA) anchor protein 8                                                                                             |
| 54194  | Alap8  | 0.46  | -0.50 | -0.37 | 0.18  | -0.07 | 0.3189 | 0.1994 | 0.1726 | 0.3794 | 0.0329 A kinase (PRKA) anchor protein 8-like                                                                                        |
| 72113  | Adk1   | -0.82 | 0.41  | 0.30  | 0.13  | -0.23 | 0.4331 | 0.1525 | 0.1932 | 0.3185 | 0.0659 aa1F domain containing kinase 1                                                                                              |
| 72113  | Adk1   | -0.10 | -0.07 | -0.05 | 0.03  | -0.05 | 0.2373 | 0.3341 | 0.4346 | 0.4874 | 0.3138 aa1F domain containing kinase 1                                                                                              |
| 5742   | Adk2   | -0.51 | -0.51 | -0.74 | -0.52 | -0.96 | 0.1708 | 0.2199 | 0.0744 | 0.0002 | 0.0001 aa1F domain containing kinase 2                                                                                              |
| 77689  | Adk4   | 0.07  | 0.14  | -0.06 | -0.11 | -0.34 | 0.6380 | 0.6454 | 0.4715 | 0.4787 | 0.0691 aa1F domain containing kinase 4                                                                                              |
| 268922 | Adk5   | -0.61 | 0.13  | -0.41 | -0.12 | -0.35 | 0.5210 | 0.5578 | 0.0279 | 0.2842 | 0.0289 aa1F domain containing kinase 5                                                                                              |
| 52906  | Ahl1   | 0.34  | 0.08  | 0.33  | 0.08  | -0.26 | 0.1977 | 0.2092 | 0.3579 | 0.0318 | 0.0006 Abelson helper integration site 1                                                                                            |
| 52906  | Ahl1   | 0.05  | -0.12 | -0.31 | -0.24 | -0.33 | 0.6320 | 0.2504 | 0.0663 | 0.0537 | 0.0056 Abelson helper integration site 1                                                                                            |
| 57742  | Ahl1   | -0.45 | -0.01 | -0.21 | -0.51 | -0.73 | 0.6372 | 0.5779 | 0.5477 | 0.2179 | 0.2151 Abelson helper integration site 1                                                                                            |
| 57742  | Ahl1   | -0.26 | -0.11 | -0.01 | -0.01 | 0.00  | 0.1830 | 0.5169 | 0.3152 | 0.0081 | 0.0001 abhydrolase domain containing 1                                                                                              |
| 213012 | Ahd10  | 0.40  | -0.22 | 0.07  | 0.15  | 0.31  | 0.1358 | 0.1327 | 0.5690 | 0.1884 | 0.4940 abhydrolase domain containing 10                                                                                             |
| 213012 | Ahd10  | 0.09  | -0.03 | -0.01 | -0.01 | 0.00  | 0.4079 | 0.5662 | 0.4593 | 0.5297 | 0.0075 abhydrolase domain containing 10                                                                                             |
| 68758  | Ahd11  | 0.20  | -0.14 | -0.13 | -0.06 | -0.14 | 0.4153 | 0.2969 | 0.2560 | 0.3518 | 0.0065 abhydrolase domain containing 11                                                                                             |
| 76192  | Ahd12  | 0.33  | -0.24 | 0.29  | 0.72  | 0.89  | 0.4725 | 0.3476 | 0.4892 | 0.0750 | 0.0075 abhydrolase domain containing 12                                                                                             |
| 68904  | Ahd13  | 0.27  | -0.41 | -0.04 | 0.10  | 0.32  | 0.2029 | 0.0593 | 0.5224 | 0.3222 | 0.0066 abhydrolase domain containing 13                                                                                             |
| 68904  | Ahd13  | 0.45  | -0.81 | -0.52 | -0.25 | 0.24  | 0.2052 | 0.0123 | 0.0411 | 0.2038 | 0.1734 abhydrolase domain containing 13                                                                                             |
| 68904  | Ahd13  | 0.42  | 0.06  | 0.58  | 0.57  | 1.25  | 0.3181 | 0.5524 | 0.2982 | 0.0377 | 0.0006 abhydrolase domain containing 13                                                                                             |
| 68944  | Ahd14  | 0.02  | -0.20 | -0.08 | 0.12  | 0.10  | 0.6713 | 0.3877 | 0.6085 | 0.3355 | 0.2755 abhydrolase domain containing 14A                                                                                            |
| 76491  | Ahd14b | -0.43 | -0.27 | -0.30 | -0.26 | -0.64 | 0.4132 | 0.6371 | 0.6394 | 0.0280 | 0.0034 abhydrolase domain containing 14b                                                                                            |
| 54608  | Ahd2   | 0.37  | 0.01  | -0.02 | 0.06  | -0.09 | 0.2141 | 0.4567 | 0.3847 | 0.4044 | 0.1879 abhydrolase domain containing 2                                                                                              |
| 54608  | Ahd2   | 0.22  | -0.24 | -0.21 | 0.00  | -0.02 | 0.3268 | 0.2837 | 0.3102 | 0.5842 | 0.4585 abhydrolase domain containing 2                                                                                              |
| 54608  | Ahd2   | 0.20  | 0.10  | 0.10  | -0.03 | -0.08 | 0.3779 | 0.6467 | 0.6364 | 0.4520 | 0.3332 abhydrolase domain containing 2                                                                                              |
| 106961 | Ahd3   | 0.63  | -0.25 | -0.36 | -0.15 | 0.22  | 0.0914 | 0.1432 | 0.0385 | 0.2087 | 0.0684 abhydrolase domain containing 3                                                                                              |
| 106961 | Ahd3   | 0.25  | -0.65 | -0.44 | 0.00  | 0.10  | 0.4496 | 0.0681 | 0.0999 | 0.5610 | 0.3452 abhydrolase domain containing 4                                                                                              |
| 105051 | Ahd4   | 0.54  | -0.91 | -0.63 | -0.17 | -0.20 | 0.2434 | 0.0151 | 0.0301 | 0.2658 | 0.1639 abhydrolase domain containing 5                                                                                              |
| 67469  | Ahd5   | 0.25  | -0.31 | -0.22 | 0.00  | 0.21  | 0.3654 | 0.1663 | 0.3392 | 0.5636 | 0.2953 abhydrolase domain containing 5                                                                                              |
| 67469  | Ahd5   | 0.36  | -0.34 | -0.35 | 0.00  | 0.11  | 0.2579 | 0.0532 | 0.0244 | 0.5624 | 0.4056 abhydrolase domain containing 6                                                                                              |
| 66082  | Ahd6   | 0.36  | -0.34 | -0.35 | 0.00  | 0.11  | 0.6114 | 0.4002 | 0.5633 | 0.5488 | 0.0081 abhydrolase domain containing 7                                                                                              |
| 384214 | Ahd7   | 0.03  | 0.06  | 0.14  | -0.25 | -0.33 | 0.4490 | 0.5081 | 0.6226 | 0.0521 | 0.0081 abhydrolase domain containing 8                                                                                              |
| 64296  | Ahd8   | -0.19 | 0.22  | 0.14  | -0.24 | -0.33 | 0.4792 | 0.3117 | 0.4065 | 0.2742 | 0.4542 abhydrolase domain containing 8                                                                                              |
| 64296  | Ahd8   | -0.28 | 0.53  | 0.40  | -0.28 | 0.03  | 0.3463 | 0.4874 | 0.5111 | 0.5344 | 0.0012 abhydrolase domain containing 9                                                                                              |
| 71932  | Ahd9   | -0.23 | -0.24 | -0.04 | 0.02  | -0.31 | 0.4483 | 0.4770 | 0.4922 | 0.5396 | 0.0171 ABI gene family, member 3                                                                                                    |
| 66610  | Ab3    | -0.39 | -0.07 | -0.53 | 0.02  | -0.48 | 0.4770 | 0.4922 | 0.5396 | 0.5344 | 0.0171 ABI gene family, member 3 (NESH) binding protein                                                                             |
| 320712 | Ab3bp  | -0.17 | 0.09  | 0.45  | -0.10 | 0.05  | 0.2901 | 0.3412 | 0.0110 | 0.2693 | 0.4008 ABI gene family, member 3 (NESH) binding protein                                                                             |
| 320712 | Ab3bp  | 0.07  | -0.05 | -0.01 | 0.03  | 0.03  | 0.4876 | 0.4562 | 0.5885 | 0.4709 | 0.3836 ABI gene family, member 3 (NESH) binding protein                                                                             |
| 320712 | Ab3bp  | 0.20  | 0.05  | 0.19  | -0.23 | -0.20 | 0.5268 | 0.5772 | 0.6164 | 0.1377 | 0.0999 ABI gene family, member 3 (NESH) binding protein                                                                             |
| 11308  | Ab1    | -0.33 | -0.03 | 0.30  | 0.13  | 0.25  | 0.4365 | 0.4526 | 0.1410 | 0.1741 | 0.1416 ab1-Interactor 1                                                                                                             |
| 11308  | Ab1    | 0.10  | 0.34  | 0.87  | 0.24  | 0.62  | 0.5606 | 0.2596 | 0.0144 | 0.1253 | 0.0015 ab1-Interactor 1                                                                                                             |
| 329165 | Ab2    | -0.12 | -0.41 | -0.19 | -0.20 | -0.15 | 0.6316 | 0.5704 | 0.5715 | 0.2394 | 0.2570 ab1-Interactor 2                                                                                                             |
| 329165 | Ab2    | 0.00  | 0.01  | 0.01  | -0.04 | 0.01  | 0.6980 | 0.5682 | 0.5756 | 0.4047 | 0.4454 ab1-Interactor 2                                                                                                             |
| 80908  | Ab2    | -0.08 | 0.00  | -0.09 | -0.11 | -0.13 | 0.4965 | 0.5566 | 0.5393 | 0.1415 | 0.0430 ABO blood group (transferase A, alpha 1,3-N-acetylgalactosaminyltransferase, transferase B, alpha 1,3-galactosyltransferase) |
| 11630  | Am1    | 0.15  | 0.16  | 0.03  | 0.08  | -0.13 | 0.5349 | 0.6045 | 0.5741 | 0.4633 | 0.3070 absent in melanoma 1                                                                                                         |
| 230306 | Am1    | -0.49 | 0.47  | 0.67  | 0.23  | 0.17  | 0.3553 | 0.5031 | 0.3161 | 0.1618 | 0.1662 absent in melanoma 1-like                                                                                                    |
| 363619 | Am2    | -0.04 | -0.03 | -0.04 | -0.01 | -0.06 | 0.6110 | 0.6484 | 0.5900 | 0.3567 | 0.2715 absent in melanoma 2                                                                                                         |
| 78994  | Aacs   | -0.05 | -0.40 | -1.01 | -0.82 | -1.95 | 0.6699 | 0.1659 | 0.1083 | 0.0502 | 0.0002 acetoacetyl-CoA synthetase                                                                                                   |
| 11423  | Ache   | -0.06 | 0.01  | 0.01  | 0.01  | 0.08  | 0.6699 | 0.1659 | 0.1083 | 0.0502 | 0.2188 acetylcholinesterase                                                                                                         |
| 110446 | Acat1  | -0.33 | -0.46 | -0.53 | -0.02 | -0.20 | 0.5233 | 0.6124 | 0.6033 | 0.2302 | 0.0810 acetyl-Coenzyme A acetyltransferase 1                                                                                        |
| 110460 | Acat2  | 0.06  | -0.05 | -0.01 | -0.06 | -0.56 | 0.6569 | 0.4362 |        |        |                                                                                                                                     |

|        |        |       |       |       |       |       |        |        |        |        |        |                                                                |
|--------|--------|-------|-------|-------|-------|-------|--------|--------|--------|--------|--------|----------------------------------------------------------------|
| 17172  | Ascl1  | -0.13 | -0.44 | -0.43 | -0.47 | -0.64 | 0.5523 | 0.0334 | 0.0215 | 0.0138 | 0.0019 | achaete-scute complex homolog 1 (Drosophila)                   |
| 17172  | Ascl1  | -0.13 | -0.31 | -0.35 | -0.44 | -0.72 | 0.6119 | 0.1549 | 0.1019 | 0.0323 | 0.0014 | achaete-scute complex homolog 1 (Drosophila)                   |
| 17172  | Ascl1  | -0.02 | -0.27 | -0.35 | -0.44 | -0.66 | 0.6945 | 0.1906 | 0.1168 | 0.0374 | 0.0024 | achaete-scute complex homolog 1 (Drosophila)                   |
| 17172  | Ascl1  | -0.01 | -0.41 | -0.30 | -0.47 | -0.67 | 0.6895 | 0.1031 | 0.1658 | 0.0208 | 0.0010 | achaete-scute complex homolog 1 (Drosophila)                   |
| 17173  | Ascl2  | 0.11  | 0.09  | 0.14  | -0.03 | -0.03 | 0.6227 | 0.5080 | 0.5370 | 0.4941 | 0.4379 | achaete-scute complex homolog 2 (Drosophila)                   |
| 56787  | Ascl3  | 0.12  | -0.02 | 0.04  | -0.02 | 0.05  | 0.4349 | 0.4177 | 0.5631 | 0.5142 | 0.2973 | achaete-scute complex homolog 3 (Drosophila)                   |
| 56787  | Ascl3  | 0.05  | 0.12  | 0.17  | 0.06  | 0.19  | 0.6229 | 0.6160 | 0.5159 | 0.3398 | 0.0135 | achaete-scute complex homolog 3 (Drosophila)                   |
| 223921 | Aaas   | 0.04  | 0.02  | 0.13  | -0.03 | -0.05 | 0.6046 | 0.5808 | 0.4828 | 0.4446 | 0.2739 | achalasia, adrenocortical insufficiency, alacrima              |
| 223921 | Aaas   | -0.19 | -0.27 | -0.26 | 0.10  | 0.08  | 0.6336 | 0.6333 | 0.5296 | 0.3953 | 0.3947 | achalasia, adrenocortical insufficiency, alacrima              |
| 11431  | Aqp1   | 0.29  | 0.59  | 0.58  | 0.49  | 0.78  | 0.3444 | 0.5323 | 0.1357 | 0.0013 | 0.0001 | acid phosphatase 1, soluble                                    |
| 11431  | Aqp1   | 0.25  | -0.08 | 0.01  | -0.07 | 0.08  | 0.4349 | 0.3470 | 0.4659 | 0.4646 | 0.0831 | acid phosphatase 1, soluble                                    |
| 11432  | Aqp2   | 0.18  | -0.17 | 0.13  | 0.00  | -0.26 | 0.4384 | 0.1525 | 0.6410 | 0.5606 | 0.4255 | acid phosphatase 2, lysosomal                                  |
| 11432  | Aqp2   | -0.42 | -0.09 | 0.12  | -0.10 | -0.19 | 0.4490 | 0.4719 | 0.3032 | 0.1984 | 0.1048 | acid phosphatase 2, lysosomal                                  |
| 11432  | Aqp2   | -0.19 | -0.36 | -0.18 | 0.18  | 0.19  | 0.4562 | 0.0992 | 0.2299 | 0.3207 | 0.1872 | acid phosphatase 2, lysosomal                                  |
| 11433  | Aqp5   | 0.95  | -1.09 | -0.59 | 0.38  | 0.34  | 0.2132 | 0.2472 | 0.4593 | 0.2610 | 0.1628 | acid phosphatase 5, tartrate resistant                         |
| 66659  | Aqp6   | 0.28  | -0.97 | -1.05 | -0.61 | -0.94 | 0.3019 | 0.0121 | 0.0007 | 0.0005 | 0.0000 | acid phosphatase 6, lysophosphatidic                           |
| 56318  | Aqp    | 0.16  | -0.14 | -0.17 | -0.02 | 0.12  | 0.4901 | 0.2374 | 0.1863 | 0.5048 | 0.0574 | acid phosphatase, prostate                                     |
| 56318  | Aqp    | 0.08  | 0.02  | 0.01  | -0.01 | 0.12  | 0.5379 | 0.5257 | 0.4868 | 0.5253 | 0.0543 | acid phosphatase, prostate                                     |
| 235534 | Aqp2   | 0.02  | -0.05 | -0.04 | 0.01  | -0.04 | 0.6443 | 0.5470 | 0.5904 | 0.5343 | 0.3627 | acid phosphatase, prostate                                     |
| 235534 | Aqp2   | -0.03 | -0.09 | -0.16 | -0.03 | -0.53 | 0.5133 | 0.3234 | 0.0720 | 0.0004 | 0.0013 | acid phosphatase-like 2                                        |
| 11737  | Arp32a | 0.60  | -0.51 | -0.54 | 0.29  | 0.48  | 0.6219 | 0.4961 | 0.2104 | 0.4759 | 0.4890 | acid phosphatase-like 2                                        |
| 11737  | Arp32a | 0.25  | -0.08 | 0.01  | -0.07 | 0.08  | 0.2170 | 0.1036 | 0.0650 | 0.2676 | 0.0628 | acid (leucine-rich) nuclear phosphoprotein 32 family, member A |
| 66471  | Arp32e | 0.78  | 0.54  | 0.54  | 0.14  | 0.12  | 0.3182 | 0.0340 | 0.0323 | 0.3566 | 0.2876 | acid (leucine-rich) nuclear phosphoprotein 32 family, member A |
| 66471  | Arp32e | 0.24  | 0.49  | 0.17  | 0.14  | 0.26  | 0.4160 | 0.1189 | 0.5904 | 0.3193 | 0.1075 | acid (leucine-rich) nuclear phosphoprotein 32 family, member E |
| 67628  | Arp32b | -0.21 | 0.86  | 0.99  | 0.44  | 0.57  | 0.4405 | 0.0102 | 0.0025 | 0.0185 | 0.0002 | acid (leucine-rich) nuclear phosphoprotein 32 family, member E |
| 67628  | Arp32b | -0.25 | 0.09  | -0.11 | -0.20 | -0.48 | 0.3972 | 0.5967 | 0.3995 | 0.2917 | 0.0134 | acid nuclear phosphoprotein 32 family, member B                |
| 67628  | Arp32b | -0.07 | 0.17  | 0.14  | -0.09 | -0.06 | 0.5817 | 0.5246 | 0.5600 | 0.2819 | 0.3201 | acid nuclear phosphoprotein 32 family, member B                |
| 11837  | Atbp   | -0.14 | -0.18 | -0.12 | -0.22 | -0.42 | 0.5478 | 0.5326 | 0.5089 | 0.1756 | 0.0257 | acidic ribosomal phosphoprotein P0                             |
| 104923 | Adl1   | -0.50 | -0.52 | -0.36 | 0.06  | 0.08  | 0.5833 | 0.5155 | 0.5093 | 0.0427 | 0.4304 | acidic ribosomal phosphoprotein P0                             |
| 71238  | Acn9   | 0.23  | -0.55 | -0.47 | -0.13 | -0.14 | 0.2579 | 0.0171 | 0.0471 | 0.3074 | 0.1457 | acriduone dioxygenase 1                                        |
| 71238  | Acn9   | 0.24  | -0.23 | -0.32 | 0.05  | -0.02 | 0.2902 | 0.1824 | 0.0634 | 0.4412 | 0.4428 | ACN9 homolog (S. cerevisiae)                                   |
| 71238  | Acn9   | 0.05  | -0.07 | -0.07 | 0.11  | 0.03  | 0.6144 | 0.6149 | 0.5847 | 0.2743 | 0.4127 | ACN9 homolog (S. cerevisiae)                                   |
| 71238  | Acn9   | 0.03  | 0.00  | 0.09  | -0.02 | -0.05 | 0.5166 | 0.4878 | 0.4953 | 0.4953 | 0.2485 | ACN9 homolog (S. cerevisiae)                                   |
| 11428  | Aco1   | 0.07  | 0.00  | -0.09 | -0.28 | -0.38 | 0.6019 | 0.6119 | 0.3344 | 0.0313 | 0.0064 | aconitase 1                                                    |
| 11428  | Aco1   | -0.25 | -0.81 | -0.11 | -0.13 | -0.04 | 0.6078 | 0.5197 | 0.4645 | 0.4317 | 0.4514 | aconitase 1                                                    |
| 11429  | Aco2   | -0.16 | -0.24 | -0.11 | 0.18  | 0.12  | 0.5204 | 0.3103 | 0.4703 | 0.2775 | 0.2832 | aconitase 2, mitochondrial                                     |
| 11451  | Acrv1  | 0.22  | 0.03  | 0.00  | 0.13  | 0.02  | 0.3541 | 0.4928 | 0.4282 | 0.1200 | 0.4257 | acrosomal vesicle protein 1                                    |
| 319713 | Albm3  | 0.46  | 0.09  | -0.10 | 0.21  | 0.11  | 0.3062 | 0.6050 | 0.4663 | 0.2809 | 0.3618 | actin binding LIM protein family, member 3                     |
| 319713 | Albm3  | -0.07 | -0.03 | 0.02  | -0.08 | -0.02 | 0.5141 | 0.6167 | 0.6156 | 0.3065 | 0.4408 | actin binding LIM protein family, member 3                     |
| 319713 | Albm3  | 0.02  | 0.07  | 0.02  | 0.01  | -0.02 | 0.6589 | 0.5926 | 0.5623 | 0.5316 | 0.4284 | actin binding LIM protein family, member 3                     |
| 70292  | Alap1  | -0.27 | 0.31  | 0.05  | -0.18 | -0.23 | 0.1285 | 0.1414 | 0.4599 | 0.0719 | 0.0203 | actin filament associated protein 1                            |
| 70292  | Alap1  | 0.15  | 0.21  | -0.25 | -0.11 | -0.40 | 0.5861 | 0.2837 | 0.5623 | 0.4225 | 0.0689 | actin filament associated protein 1                            |
| 70292  | Alap1  | 0.04  | 0.68  | 0.34  | -0.45 | -0.35 | 0.6805 | 0.2906 | 0.5620 | 0.0188 | 0.0163 | actin filament associated protein 1                            |
| 106877 | Alap11 | 0.50  | -0.48 | 0.08  | 0.29  | 0.84  | 0.2818 | 0.1998 | 0.6290 | 0.1610 | 0.0019 | actin filament associated protein 1-like 1                     |
| 106877 | Alap11 | 0.44  | -0.39 | 0.09  | 0.51  | 0.69  | 0.3065 | 0.2801 | 0.6422 | 0.0650 | 0.0073 | actin filament associated protein 1-like 1                     |
| 226250 | Alap12 | 0.45  | -0.80 | -0.57 | -0.30 | -0.27 | 0.1862 | 0.0323 | 0.0122 | 0.1080 | 0.1267 | actin filament associated protein 1-like 2                     |
| 56443  | Apc1a  | -0.72 | -0.18 | -0.26 | -0.22 | -0.23 | 0.4480 | 0.4839 | 0.4997 | 0.1069 | 0.0771 | actin related protein 2/3 complex, subunit 1A                  |
| 11867  | Apc1b  | -0.20 | 0.16  | -0.25 | -0.19 | -0.46 | 0.2873 | 0.4764 | 0.1169 | 0.1430 | 0.0007 | actin related protein 2/3 complex, subunit 1B                  |
| 76709  | Arp2c  | 0.53  | -0.22 | 0.28  | 0.57  | 0.70  | 0.2762 | 0.3602 | 0.3726 | 0.0634 | 0.0200 | actin related protein 2/3 complex, subunit 2                   |
| 56378  | Arp3   | 0.24  | -0.23 | 0.18  | 0.32  | 0.25  | 0.3845 | 0.2659 | 0.2671 | 0.1046 | 0.1368 | actin related protein 2/3 complex, subunit 3                   |
| 56378  | Arp3   | -0.31 | -0.02 | 0.04  | -0.12 | -0.45 | 0.5459 | 0.4298 | 0.4288 | 0.4844 | 0.2801 | actin related protein 2/3 complex, subunit 3                   |
| 68089  | Arp4   | -0.83 | 0.44  | 0.34  | -0.31 | -0.19 | 0.3089 | 0.1923 | 0.1994 | 0.0622 | 0.0239 | actin related protein 2/3 complex, subunit 3                   |
| 68089  | Arp4   | 0.02  | 0.36  | 0.11  | -0.19 | -0.06 | 0.6918 | 0.5253 | 0.5717 | 0.3584 | 0.4405 | actin related protein 2/3 complex, subunit 4                   |
| 67771  | Arp5   | 0.31  | 0.37  | 0.38  | 0.13  | 0.07  | 0.2757 | 0.3218 | 0.3681 | 0.2824 | 0.0024 | actin related protein 2/3 complex, subunit 5                   |
| 74192  | Arp5l  | -0.08 | -0.19 | -0.03 | 0.15  | 0.59  | 0.6417 | 0.5750 | 0.5932 | 0.3988 | 0.0248 | actin related protein 2/3 complex, subunit 5                   |
| 76652  | Arpm1  | -0.10 | -0.01 | 0.11  | -0.03 | -0.09 | 0.4428 | 0.6207 | 0.2609 | 0.4847 | 0.2190 | actin related protein 2/3 complex, subunit 5-like              |
| 11459  | Acta1  | -0.56 | 0.18  | 1.79  | 1.13  | 1.55  | 0.5183 | 0.2662 | 0.0791 | 0.3477 | 0.1741 | actin, alpha 1, skeletal muscle                                |
| 11475  | Acta2  | 0.63  | -0.01 | 0.21  | 0.62  | 0.72  | 0.1320 | 0.6373 | 0.2926 | 0.0154 | 0.0109 | actin, alpha 2, smooth muscle, aorta                           |
| 11475  | Acta2  | 0.53  | -0.28 | 0.05  | 1.05  | 1.09  | 0.1962 | 0.4562 | 0.1812 | 0.0013 | 0.0044 | actin, alpha 2, smooth muscle, aorta                           |
| 11475  | Acta2  | 0.55  | -0.08 | 0.49  | 0.65  | 0.69  | 0.2086 | 0.6124 | 0.4837 | 0.0394 | 0.0142 | actin, alpha 2, smooth muscle, aorta                           |
| 11475  | Acta2  | 0.66  | 0.82  | 1.39  | 1.24  | 1.71  | 0.2173 | 0.2114 | 0.0176 | 0.0001 | 0.0000 | actin, alpha 2, smooth muscle, aorta                           |
| 11475  | Acta2  | 0.64  | 0.23  | 0.45  | 0.66  | 1.05  | 0.5438 | 0.2445 | 0.0521 | 0.0220 | 0.0037 | actin, alpha 2, smooth muscle, aorta                           |
| 11475  | Acta2  | 0.60  | 0.21  | 0.44  | 0.79  | 0.77  | 0.2606 | 0.5916 | 0.2772 | 0.0220 | 0.0158 | actin, alpha 2, smooth muscle, aorta                           |
| 11475  | Acta2  | 0.45  | 0.18  | 0.47  | 0.78  | 0.79  | 0.3173 | 0.5593 | 0.1048 | 0.0237 | 0.0138 | actin, alpha 2, smooth muscle, aorta                           |
| 11475  | Acta2  | 0.50  | 0.34  | 0.51  | 0.61  | 1.04  | 0.3595 | 0.4586 | 0.2429 | 0.1086 | 0.0095 | actin, alpha 2, smooth muscle, aorta                           |
| 11475  | Acta2  | 0.44  | 0.28  | 0.54  | 0.77  | 0.81  | 0.3680 | 0.4954 | 0.1445 | 0.0430 | 0.0208 | actin, alpha 2, smooth muscle, aorta                           |
| 11475  | Acta2  | 0.48  | 0.32  | 0.53  | 0.69  | 0.83  | 0.3698 |        |        |        |        |                                                                |



|        |          |       |       |       |       |       |        |        |        |        |                                                            |
|--------|----------|-------|-------|-------|-------|-------|--------|--------|--------|--------|------------------------------------------------------------|
| 60525  | Acss2    | 0.08  | -0.02 | -0.05 | 0.02  | 0.04  | 0.4955 | 0.5795 | 0.5131 | 0.4987 | 0.3533 acyl-CoA synthetase short-chain family member 2     |
| 60525  | Acss2    | -0.17 | -0.24 | -0.09 | 0.07  | -0.47 | 0.6019 | 0.6315 | 0.5510 | 0.4866 | 0.0097 acyl-CoA synthetase short-chain family member 2     |
| 60525  | Acss2    | -0.04 | -0.01 | -0.11 | 0.03  | -0.09 | 0.6219 | 0.5963 | 0.4304 | 0.4949 | 0.2458 acyl-CoA synthetase short-chain family member 2     |
| 390600 | Acss3    | 0.10  | -0.19 | 0.04  | -0.06 | -0.04 | 0.5765 | 0.1410 | 0.5547 | 0.4266 | 0.4253 acyl-CoA synthetase short-chain family member 3     |
| 26897  | Acoi1    | 0.29  | 0.64  | 0.58  | 0.41  | 0.91  | 0.5480 | 0.3574 | 0.3738 | 0.1486 | 0.0063 acyl-CoA thioesterase 1                             |
| 64833  | Acoi10   | 0.77  | -0.33 | 0.21  | 0.95  | 1.55  | 0.1840 | 0.3905 | 0.5917 | 0.0164 | 0.0004 acyl-CoA thioesterase 10                            |
| 329910 | Acoi11   | -0.41 | -0.06 | -0.29 | -0.38 | -0.72 | 0.1157 | 0.3570 | 0.0365 | 0.0092 | 0.0005 acyl-CoA thioesterase 11                            |
| 329910 | Acoi11   | -0.03 | -0.03 | -0.01 | -0.08 | 0.05  | 0.6335 | 0.4216 | 0.5010 | 0.2745 | 0.3446 acyl-CoA thioesterase 11                            |
| 74156  | Acoi12   | 0.02  | -0.01 | 0.35  | 0.05  | 0.03  | 0.6542 | 0.6472 | 0.5895 | 0.4473 | 0.3781 acyl-CoA thioesterase 12                            |
| 171210 | Acoi2    | 0.38  | -0.01 | 0.01  | 0.58  | 0.57  | 0.0928 | 0.4839 | 0.1569 | 0.0002 | 0.0103 acyl-CoA thioesterase 2                             |
| 171281 | Acoi3    | 0.16  | 0.05  | 0.03  | 0.13  | 0.14  | 0.2946 | 0.6310 | 0.5706 | 0.0873 | 0.0638 acyl-CoA thioesterase 3                             |
| 171282 | Acoi4    | 0.36  | -0.15 | -0.07 | 0.21  | 0.11  | 0.2977 | 0.2276 | 0.3133 | 0.0584 | 0.1047 acyl-CoA thioesterase 4                             |
| 171282 | Acoi4    | 0.12  | 0.09  | 0.07  | 0.08  | 0.06  | 0.4564 | 0.6517 | 0.5950 | 0.2323 | 0.2367 acyl-CoA thioesterase 4                             |
| 217698 | Acoi5    | 0.07  | 0.03  | -0.06 | 0.05  | 0.05  | 0.5094 | 0.6371 | 0.3136 | 0.3706 | 0.3374 acyl-CoA thioesterase 5                             |
| 217700 | Acoi6    | -0.05 | -0.03 | 0.05  | -0.08 | -0.07 | 0.5779 | 0.5552 | 0.5197 | 0.2949 | 0.2484 acyl-CoA thioesterase 6                             |
| 217700 | Acoi6    | -0.04 | -0.09 | -0.07 | -0.05 | -0.14 | 0.6040 | 0.4978 | 0.5460 | 0.3630 | 0.0734 acyl-CoA thioesterase 6                             |
| 70025  | Acoi7    | -0.03 | -0.08 | -0.15 | 0.04  | -0.23 | 0.6544 | 0.3570 | 0.2515 | 0.4688 | 0.0484 acyl-CoA thioesterase 7                             |
| 170789 | Acoi8    | -0.96 | -0.01 | -0.45 | -0.62 | -1.37 | 0.2647 | 0.6645 | 0.4073 | 0.0003 | 0.0000 acyl-CoA thioesterase 7                             |
| 536360 | Acoi9    | 0.06  | -0.35 | 0.28  | 0.62  | 0.94  | 0.6678 | 0.5714 | 0.2959 | 0.0187 | 0.0013 acyl-CoA thioesterase 9                             |
| 170760 | Acbd3    | 0.27  | 0.81  | 0.58  | -0.63 | -0.24 | 0.5238 | 0.1631 | 0.3196 | 0.0194 | 0.1050 acyl-Coenzyme A binding domain containing 3         |
| 170760 | Acbd3    | -0.33 | -0.15 | 0.17  | 0.17  | 0.16  | 0.5887 | 0.4761 | 0.3089 | 0.1713 | 0.1373 acyl-Coenzyme A binding domain containing 3         |
| 170760 | Acbd3    | -0.02 | 0.53  | 0.20  | -0.73 | -0.47 | 0.6937 | 0.4048 | 0.6402 | 0.0076 | 0.0532 acyl-Coenzyme A binding domain containing 3         |
| 67131  | Acbd4    | -0.46 | 0.10  | -0.05 | 0.37  | 0.16  | 0.5407 | 0.3695 | 0.4152 | 0.0311 | 0.0201 acyl-Coenzyme A binding domain containing 4         |
| 74159  | Acbd5    | 0.21  | -0.05 | 0.36  | 0.55  | 0.26  | 0.2232 | 0.1680 | 0.0229 | 0.0544 | 0.0007 acyl-Coenzyme A binding domain containing 5         |
| 74159  | Acbd5    | 0.01  | -0.04 | -0.01 | 0.03  | -0.02 | 0.4839 | 0.5163 | 0.6059 | 0.2958 | 0.4729 acyl-Coenzyme A binding domain containing 5         |
| 74159  | Acbd5    | 0.21  | -0.04 | -0.01 | 0.03  | -0.02 | 0.6765 | 0.5540 | 0.6424 | 0.4698 | 0.4420 acyl-Coenzyme A binding domain containing 5         |
| 72482  | Acbd6    | -0.03 | 0.49  | 0.41  | 0.01  | 0.06  | 0.6775 | 0.3136 | 0.3827 | 0.5560 | 0.4162 acyl-Coenzyme A binding domain containing 6         |
| 72482  | Acbd6    | 0.21  | -0.24 | -0.43 | -0.20 | -0.15 | 0.2647 | 0.0617 | 0.0022 | 0.0811 | 0.1241 acyl-Coenzyme A binding domain containing 7         |
| 71985  | Acoi10   | 0.19  | -0.42 | -0.19 | -0.15 | -0.43 | 0.4314 | 0.0606 | 0.1867 | 0.2032 | 0.0057 acyl-Coenzyme A dehydrogenase family, member 10     |
| 102632 | Acoi11   | 0.52  | -0.47 | -0.22 | 0.31  | 0.41  | 0.1006 | 0.2336 | 0.2569 | 0.1013 | 0.0134 acyl-Coenzyme A dehydrogenase family, member 10     |
| 102632 | Acoi11   | 0.03  | -0.09 | 0.00  | -0.06 | 0.01  | 0.1006 | 0.2336 | 0.2569 | 0.1013 | 0.0134 acyl-Coenzyme A dehydrogenase family, member 10     |
| 66948  | Acoi8    | 0.20  | 0.27  | 0.26  | 0.10  | 0.01  | 0.6226 | 0.2766 | 0.5399 | 0.3095 | 0.4709 acyl-Coenzyme A dehydrogenase family, member 11     |
| 229211 | Acoi9    | 0.29  | -0.14 | -0.16 | -0.12 | -0.01 | 0.4701 | 0.5501 | 0.5476 | 0.2910 | 0.4792 acyl-Coenzyme A dehydrogenase family, member 11     |
| 229211 | Acoi9    | -0.03 | -0.03 | -0.10 | -0.13 | -0.09 | 0.4318 | 0.3044 | 0.3006 | 0.4321 | 0.4818 acyl-Coenzyme A dehydrogenase family, member 8      |
| 11363  | Acoi1    | 0.07  | -0.30 | -0.21 | 0.11  | 0.79  | 0.6180 | 0.1211 | 0.1887 | 0.0010 | 0.2845 acyl-Coenzyme A dehydrogenase family, member 9      |
| 11364  | Acoi1    | 0.53  | -0.17 | -0.20 | 0.24  | 0.21  | 0.1653 | 0.2966 | 0.2872 | 0.2354 | 0.0002 acyl-Coenzyme A dehydrogenase, long-chain           |
| 11409  | Acoi1    | 0.12  | -0.16 | 0.03  | 0.19  | 0.10  | 0.5477 | 0.3674 | 0.6128 | 0.2576 | 0.2569 acyl-Coenzyme A dehydrogenase, medium chain         |
| 66885  | Acoi8    | 0.25  | -0.21 | -0.03 | 0.28  | 0.46  | 0.4594 | 0.6540 | 0.5086 | 0.0540 | 0.3054 acyl-Coenzyme A dehydrogenase, short chain          |
| 11370  | Acoi1    | 0.06  | -0.18 | -0.16 | -0.07 | -0.23 | 0.6372 | 0.3019 | 0.3114 | 0.4834 | 0.0047 acyl-Coenzyme A dehydrogenase, short branched chain |
| 11430  | Acoi1    | 0.39  | -0.24 | -0.17 | 0.06  | -0.04 | 0.3713 | 0.2478 | 0.3006 | 0.4321 | 0.1940 acyl-Coenzyme A dehydrogenase, very long chain      |
| 11430  | Acoi1    | 0.10  | 0.19  | 0.39  | 0.24  | 0.31  | 0.4743 | 0.1907 | 0.0117 | 0.0542 | 0.4266 acyl-Coenzyme A dehydrogenase, 1, palmitoyl         |
| 93732  | Acoi2    | 0.17  | 0.11  | -0.27 | -0.41 | -0.71 | 0.5433 | 0.5572 | 0.1460 | 0.0042 | 0.0044 acyl-Coenzyme A dehydrogenase 1, palmitoyl          |
| 74121  | Acoi1    | -0.87 | -0.21 | -0.36 | -0.44 | -1.09 | 0.3808 | 0.5078 | 0.5554 | 0.0108 | 0.0003 acyl-Coenzyme A oxidase 1, branched chain           |
| 69923  | Amac1    | 0.33  | 0.58  | -0.31 | -0.33 | -1.00 | 0.4937 | 0.4733 | 0.2118 | 0.2102 | 0.0001 acyl-Coenzyme A oxidase 1, palmitoyl                |
| 56293  | Amac1    | 0.07  | -0.06 | -0.09 | -0.04 | -0.12 | 0.2132 | 0.2090 | 0.0564 | 0.0884 | 0.0028 acyl-Coenzyme A oxidase 2, branched chain           |
| 27052  | Acoi1    | 0.34  | -0.09 | -0.27 | -0.10 | -0.27 | 0.2133 | 0.3276 | 0.0967 | 0.2821 | 0.0001 acyl-Coenzyme A oxidase 3, pristanoyl               |
| 27052  | Acoi1    | 0.04  | -0.71 | -0.08 | -0.02 | 0.01  | 0.6034 | 0.4085 | 0.5802 | 0.5223 | 0.0553 acyl-malonyl condensing enzyme 1                    |
| 235606 | Apeh     | 0.04  | -0.71 | -0.08 | -0.02 | 0.01  | 0.6034 | 0.4085 | 0.5802 | 0.5223 | 0.0553 acyl-malonyl condensing enzyme 1                    |
| 235606 | Apeh     | -0.86 | 0.07  | -0.21 | 0.00  | -0.38 | 0.4224 | 0.3771 | 0.4700 | 0.5594 | 0.4661 acylglycerol kinase                                 |
| 66204  | Acp1     | 0.18  | -0.86 | -1.04 | -0.58 | -1.06 | 0.4989 | 0.0097 | 0.0016 | 0.0020 | 0.2319 acylglycerol kinase                                 |
| 75572  | Acp2     | -0.38 | -0.30 | -0.36 | -0.43 | -0.54 | 0.4735 | 0.6381 | 0.6310 | 0.0422 | 0.0001 acylphosphatase 1, erythrocyte (common) type        |
| 79802  | Ayfl1b   | 0.24  | -0.07 | -0.10 | 0.01  | 0.00  | 0.4086 | 0.3277 | 0.2634 | 0.5464 | 0.0065 acylphosphatase 2, muscle type                      |
| 58860  | Adamdec1 | 0.04  | -0.62 | -0.90 | -0.41 | -0.52 | 0.6903 | 0.6144 | 0.4543 | 0.1003 | 0.4815 acyltransferase like 1B                             |
| 77739  | Adamsi1  | 0.41  | -0.09 | 0.28  | 0.37  | 0.67  | 0.1288 | 0.4606 | 0.2471 | 0.0061 | 0.0573 ADAM-like, dectsyn 1                                |
| 77739  | Adamsi1  | 0.04  | -0.01 | 0.07  | 0.04  | 0.04  | 0.6676 | 0.5622 | 0.5484 | 0.3946 | 0.0000 ADAMTS-like 1                                       |
| 77739  | Adamsi1  | -0.02 | 0.11  | -0.06 | -0.02 | 0.11  | 0.6981 | 0.1252 | 0.0077 | 0.0017 | 0.3118 ADAMTS-like 1                                       |
| 77794  | Adamsi2  | -0.01 | 1.16  | 2.20  | 1.44  | 1.80  | 0.6981 | 0.1252 | 0.0077 | 0.0017 | 0.4860 ADAMTS-like 1                                       |
| 269959 | Adamsi3  | -0.05 | -0.11 | 0.37  | 0.65  | 0.69  | 0.6711 | 0.5646 | 0.1357 | 0.0022 | 0.0000 ADAMTS-like 2                                       |
| 229959 | Adamsi4  | 0.00  | -0.01 | -0.02 | -0.05 | -0.19 | 0.7019 | 0.4495 | 0.4146 | 0.3677 | 0.0007 ADAMTS-like 3                                       |
| 66548  | Adamsi5  | 0.59  | -0.07 | 0.59  | 1.17  | 1.26  | 0.2400 | 0.4933 | 0.1786 | 0.0021 | 0.0110 ADAMTS-like 3                                       |
| 66548  | Adamsi5  | 0.31  | -0.19 | 0.29  | 0.28  | 0.31  | 0.3217 | 0.2515 | 0.3767 | 0.1062 | 0.0001 ADAMTS-like 4                                       |
| 66548  | Adamsi5  | -0.12 | 0.23  | 0.42  | 0.01  | -0.17 | 0.4406 | 0.5270 | 0.2673 | 0.5372 | 0.0228 ADAMTS-like 5                                       |
| 11764  | Ap1b1    | -0.18 | 0.18  | -0.04 | 0.09  | -0.11 | 0.4973 | 0.3866 | 0.6411 | 0.3602 | 0.3464 ADAMTS-like 5                                       |
| 11765  | Ap1g1    | -0.29 | 0.20  | 0.52  | 0.09  | 0.12  | 0.3967 | 0.2016 | 0.0266 | 0.2911 | 0.3674 adaptor protein complex AP-1, beta 1 subunit        |
| 11765  | Ap1g1    | 0.09  | -0.14 | 0.17  | 0.22  | 0.48  | 0.5536 | 0.4919 | 0.3775 | 0.1557 | 0.2191 adaptor protein complex AP-1, gamma 1 subunit       |
| 11765  | Ap1g2    | -0.01 | 0.13  | 0.06  | 0.02  | 0.12  | 0.6945 | 0.2466 | 0.4659 | 0.5150 | 0.0023 adaptor protein complex AP-1, gamma 1 subunit       |
| 11766  | Ap1g2    | -0.49 | 0.06  | -0.09 | -0.20 | -0.51 | 0.4210 | 0.3717 | 0.4642 | 0.2310 | 0.2771 adaptor protein complex AP-1, gamma 1 subunit       |
| 11768  | Ap1m2    | -0.84 | 0.17  | 0.33  | 0.06  | -0.25 | 0.2613 | 0.3041 | 0.1871 | 0.3266 | 0.0091 adaptor protein complex AP-1, gamma 2 subunit       |
| 11768  | Ap1m2    | 0.14  | 0.00  | -     |       |       |        |        |        |        |                                                            |

|        |         |       |       |       |       |       |        |        |        |        |        |                                                    |
|--------|---------|-------|-------|-------|-------|-------|--------|--------|--------|--------|--------|----------------------------------------------------|
| 11775  | Ap3b2   | -0.01 | 0.01  | 0.06  | 0.05  | 0.02  | 0.6896 | 0.6294 | 0.3793 | 0.3577 | 0.4096 | adaptor-related protein complex 3, beta 2 subunit  |
| 11776  | Ap3d1   | -0.49 | 0.16  | 0.12  | -0.26 | -0.06 | 0.2035 | 0.3653 | 0.4597 | 0.0271 | 0.3819 | adaptor-related protein complex 3, delta 1 subunit |
| 11777  | Ap3d1   | -0.69 | 0.26  | 0.62  | 0.46  | 0.37  | 0.3892 | 0.2937 | 0.1056 | 0.0397 | 0.0321 | adaptor-related protein complex 3, delta 1 subunit |
| 55946  | Ap3m1   | 0.50  | -0.97 | -0.96 | -0.46 | -0.30 | 0.3857 | 0.0119 | 0.0076 | 0.2071 | 0.0420 | adaptor-related protein complex 3, mu 1 subunit    |
| 55946  | Ap3m1   | 0.21  | -0.51 | -0.81 | 0.21  | -0.06 | 0.3937 | 0.0141 | 0.0579 | 0.4456 | 0.3757 | adaptor-related protein complex 3, mu 1 subunit    |
| 55946  | Ap3m1   | 0.09  | -0.72 | -0.84 | -0.67 | -0.86 | 0.4719 | 0.0016 | 0.0010 | 0.0001 | 0.0000 | adaptor-related protein complex 3, mu 1 subunit    |
| 55946  | Ap3m1   | 0.13  | -0.77 | -0.86 | -0.43 | -0.64 | 0.5808 | 0.0734 | 0.0450 | 0.0273 | 0.0104 | adaptor-related protein complex 3, mu 1 subunit    |
| 64833  | Ap3m2   | -0.18 | -0.38 | -0.93 | -1.34 | -1.79 | 0.0259 | 0.4388 | 0.0172 | 0.0001 | 0.0000 | adaptor-related protein complex 3, mu 2 subunit    |
| 64833  | Ap3m2   | -0.18 | 1.06  | 0.99  | 0.73  | 1.17  | 0.5606 | 0.0688 | 0.0774 | 0.0014 | 0.0000 | adaptor-related protein complex 3, mu 2 subunit    |
| 11777  | Ap3s1   | 0.59  | -0.37 | -0.06 | 0.30  | 0.62  | 0.0620 | 0.2552 | 0.6360 | 0.0302 | 0.0012 | adaptor-related protein complex 3, sigma 1 subunit |
| 11777  | Ap3s1   | 0.73  | -0.38 | -0.03 | 0.32  | 0.45  | 0.0760 | 0.1310 | 0.5519 | 0.0668 | 0.0123 | adaptor-related protein complex 3, sigma 1 subunit |
| 11778  | Ap3s2   | 0.07  | -0.15 | -0.15 | 0.00  | -0.02 | 0.5330 | 0.1584 | 0.2284 | 0.5615 | 0.4281 | adaptor-related protein complex 3, sigma 2 subunit |
| 11778  | Ap3s2   | 0.09  | -0.11 | 0.10  | 0.26  | 0.31  | 0.5481 | 0.2733 | 0.5785 | 0.1210 | 0.0657 | adaptor-related protein complex 3, sigma 2 subunit |
| 252903 | Ap1b1   | -0.07 | -0.57 | -0.46 | 0.15  | -0.08 | 0.6974 | 0.3979 | 0.4302 | 0.3915 | 0.0483 | adaptor-related protein complex AP-1, mu subunit 1 |
| 252903 | Ap1b3   | -0.04 | -0.11 | -0.25 | -0.36 | -0.43 | 0.5846 | 0.2819 | 0.0658 | 0.0100 | 0.0046 | adaptor-related protein complex AP-1, sigma 3      |
| 67489  | Ap4b1   | -0.07 | -0.04 | 0.03  | -0.03 | -0.03 | 0.6116 | 0.5577 | 0.5346 | 0.4855 | 0.0476 | adaptor-related protein complex AP-1, sigma 3      |
| 67489  | Ap4b1   | -0.41 | -0.01 | -0.24 | -0.17 | -0.04 | 0.4424 | 0.4225 | 0.5950 | 0.1495 | 0.4140 | adaptor-related protein complex AP-4, beta 1       |
| 108011 | Ap4e1   | 0.36  | -0.14 | -0.08 | 0.16  | 0.54  | 0.4404 | 0.3339 | 0.4063 | 0.3976 | 0.0285 | adaptor-related protein complex AP-4, beta 1       |
| 108011 | Ap4e1   | 0.35  | -0.10 | -0.08 | 0.16  | 0.27  | 0.2666 | 0.3319 | 0.3356 | 0.1252 | 0.0177 | adaptor-related protein complex AP-4, epsilon 1    |
| 108011 | Ap4e1   | 0.20  | 0.10  | 0.01  | -0.07 | -0.04 | 0.5303 | 0.5248 | 0.4073 | 0.3743 | 0.0008 | adaptor-related protein complex AP-4, epsilon 1    |
| 11781  | Ap4m1   | 0.06  | 0.49  | 0.09  | 0.35  | 0.57  | 0.6250 | 0.1895 | 0.0957 | 0.0040 | 0.0040 | adaptor-related protein complex AP-4, mu 1         |
| 11781  | Ap4m1   | 0.12  | -0.18 | -0.25 | -0.34 | -0.38 | 0.5454 | 0.5499 | 0.4886 | 0.3196 | 0.0343 | adaptor-related protein complex AP-4, sigma 1      |
| 11782  | Ap4s1   | -0.52 | -0.23 | -0.19 | -0.10 | -0.34 | 0.6831 | 0.1045 | 0.0611 | 0.0002 | 0.0000 | adaptor-related protein complex AP-4, sigma 1      |
| 11782  | Ap4s1   | 0.02  | -0.28 | -0.29 | -0.15 | -0.41 | 0.6831 | 0.1045 | 0.0611 | 0.0002 | 0.0000 | adaptor-related protein complex AP-4, sigma 1      |
| 228790 | Asx1    | 1.00  | 1.99  | 1.16  | 1.16  | 1.71  | 0.3113 | 0.1026 | 0.3775 | 0.0721 | 0.1332 | additional sex combs like 1 (Drosophila)           |
| 228790 | Asx1    | -0.33 | 0.66  | 0.41  | -0.32 | -0.19 | 0.4419 | 0.0064 | 0.0013 | 0.0000 | 0.0000 | additional sex combs like 1 (Drosophila)           |
| 228790 | Asx1    | -0.28 | 0.92  | 0.92  | 0.19  | 0.86  | 0.4484 | 0.5793 | 0.0474 | 0.0093 | 0.0019 | additional sex combs like 2 (Drosophila)           |
| 75302  | Asx2    | -0.40 | 0.29  | -0.12 | -0.86 | -0.96 | 0.6039 | 0.0362 | 0.0129 | 0.0003 | 0.0000 | additional sex combs like 2 (Drosophila)           |
| 75302  | Asx2    | -0.07 | -0.52 | -0.63 | -0.69 | -0.93 | 0.6039 | 0.0362 | 0.0129 | 0.0003 | 0.0000 | additional sex combs like 2 (Drosophila)           |
| 75302  | Asx2    | -0.04 | -0.55 | -0.66 | -0.29 | -0.41 | 0.2846 | 0.5080 | 0.2878 | 0.1616 | 0.0044 | additional sex combs like 2 (Drosophila)           |
| 211961 | Asx3    | -0.20 | 0.04  | 0.08  | -0.17 | -0.17 | 0.4526 | 0.4094 | 0.3855 | 0.1399 | 0.0703 | additional sex combs like 3 (Drosophila)           |
| 211961 | Ado1    | -0.86 | 0.95  | 0.96  | -0.10 | -0.11 | 0.5544 | 0.5385 | 0.3114 | 0.0136 | 0.0209 | aducan 1 (alpha)                                   |
| 11518  | Ado1    | -0.48 | -0.31 | 0.21  | 0.68  | 0.64  | 0.2302 | 0.1950 | 0.3715 | 0.0363 | 0.0724 | aducan 2 (beta)                                    |
| 11519  | Ado2    | -0.34 | 0.16  | 0.07  | -0.41 | -0.28 | 0.4740 | 0.5213 | 0.4901 | 0.5595 | 0.4830 | aducan 2 (beta)                                    |
| 11519  | Ado2    | -0.08 | 0.04  | 0.04  | 0.00  | 0.00  | 0.5344 | 0.5597 | 0.2153 | 0.4792 | 0.2822 | aducan 2 (beta)                                    |
| 11519  | Ado2    | -0.06 | -0.02 | 0.11  | -0.02 | -0.05 | 0.5904 | 0.4818 | 0.6298 | 0.2033 | 0.1284 | aducan 3 (gamma)                                   |
| 11519  | Ado3    | 0.06  | 0.06  | -0.01 | 0.10  | 0.06  | 0.2835 | 0.2486 | 0.0569 | 0.1375 | 0.2646 | aducan 3 (gamma)                                   |
| 27360  | Ado3    | 0.47  | -0.41 | -0.61 | 0.33  | 0.33  | 0.3598 | 0.0520 | 0.0640 | 0.5038 | 0.0896 | adenine phosphoribosyl transferase                 |
| 27360  | Ado3    | -0.64 | 0.75  | 0.62  | 0.07  | 0.24  | 0.2645 | 0.2836 | 0.3569 | 0.0853 | 0.0004 | adenine phosphoribosyl transferase                 |
| 11821  | Aprt    | -1.11 | 0.31  | 0.07  | -0.28 | -0.77 | 0.4875 | 0.5363 | 0.1021 | 0.4006 | 0.0896 | adenomatosis polyposis coli                        |
| 11821  | Aprt    | -0.09 | 0.01  | 0.12  | 0.05  | 0.12  | 0.2393 | 0.4821 | 0.6041 | 0.1943 | 0.1152 | adenomatosis polyposis coli                        |
| 11789  | Aprt    | 0.51  | -0.09 | 0.17  | 0.05  | 0.30  | 0.2598 | 0.4464 | 0.5223 | 0.1884 | 0.0997 | adenomatosis polyposis coli                        |
| 11789  | Aprt    | 0.52  | -0.07 | 0.03  | 0.34  | 0.34  | 0.2870 | 0.6316 | 0.4504 | 0.2849 | 0.0997 | adenomatosis polyposis coli                        |
| 11789  | Aprt    | 0.41  | 0.15  | 0.28  | 0.27  | 0.51  | 0.2881 | 0.4764 | 0.5744 | 0.3923 | 0.1290 | adenomatosis polyposis coli                        |
| 11789  | Aprt    | 0.48  | -0.10 | 0.14  | 0.16  | 0.30  | 0.3267 | 0.5875 | 0.5303 | 0.3423 | 0.0462 | adenomatosis polyposis coli                        |
| 11789  | Aprt    | 0.53  | 0.06  | 0.02  | 0.19  | 0.44  | 0.3267 | 0.5875 | 0.5303 | 0.3423 | 0.1969 | adenomatosis polyposis coli                        |
| 11789  | Aprt    | 0.36  | 0.00  | 0.18  | 0.22  | 0.23  | 0.3287 | 0.5968 | 0.4803 | 0.2924 | 0.0235 | adenomatosis polyposis coli                        |
| 11789  | Aprt    | 0.43  | 0.18  | 0.22  | 0.23  | 0.46  | 0.3443 | 0.6465 | 0.5978 | 0.2734 | 0.0371 | adenomatosis polyposis coli                        |
| 11789  | Aprt    | 0.35  | 0.13  | 0.28  | 0.33  | 0.37  | 0.3596 | 0.6107 | 0.3817 | 0.1831 | 0.1890 | adenomatosis polyposis coli                        |
| 11789  | Aprt    | -0.64 | 0.19  | -0.02 | 0.00  | -0.28 | 0.4025 | 0.3222 | 0.4107 | 0.5623 | 0.0245 | adenomatosis polyposis coli                        |
| 11789  | Aprt    | -0.32 | 0.09  | 0.34  | 0.28  | 0.26  | 0.4659 | 0.5311 | 0.5298 | 0.1202 | 0.1197 | adenomatosis polyposis coli                        |
| 11789  | Aprt    | -0.10 | -0.12 | 0.09  | -0.18 | -0.21 | 0.5707 | 0.3862 | 0.2330 | 0.2548 | 0.1044 | adenomatosis polyposis coli                        |
| 11789  | Aprt    | -0.32 | 0.10  | 0.22  | 0.10  | -0.16 | 0.5713 | 0.3970 | 0.4116 | 0.1181 | 0.1591 | adenomatosis polyposis coli                        |
| 11789  | Aprt    | -0.28 | 0.07  | 0.18  | 0.28  | 0.25  | 0.5730 | 0.3749 | 0.2771 | 0.2806 | 0.1307 | adenomatosis polyposis coli                        |
| 11789  | Aprt    | -0.28 | 0.07  | 0.18  | 0.36  | 0.33  | 0.6003 | 0.3875 | 0.3012 | 0.2233 | 0.1104 | adenomatosis polyposis coli                        |
| 11789  | Aprt    | -0.28 | 0.07  | 0.18  | 0.36  | 0.33  | 0.6003 | 0.3875 | 0.3012 | 0.2233 | 0.1307 | adenomatosis polyposis coli                        |
| 23805  | Apod2   | 0.06  | 0.42  | 0.23  | -0.33 | -0.24 | 0.6672 | 0.4971 | 0.6359 | 0.0959 | 0.2880 | adenomatosis polyposis coli down-regulated 1       |
| 494504 | Apod2   | -0.16 | 0.12  | 0.22  | 0.13  | -0.06 | 0.5641 | 0.5580 | 0.6386 | 0.2339 | 0.4141 | adenomatosis polyposis coli down-regulated 1       |
| 494504 | Apod1   | -0.11 | -0.03 | 0.11  | 0.04  | 0.04  | 0.4659 | 0.6445 | 0.1947 | 0.4386 | 0.2698 | adenomatosis polyposis coli down-regulated 1       |
| 494504 | Apod1   | 0.11  | 0.08  | 0.28  | -0.07 | 0.25  | 0.6320 | 0.5244 | 0.3172 | 0.5188 | 0.0001 | adenomatosis polyposis coli down-regulated 1       |
| 11539  | Adora1  | 0.30  | 0.41  | 0.52  | 0.86  | 1.22  | 0.3760 | 0.0689 | 0.1042 | 0.0195 | 0.0072 | adenosine A1 receptor                              |
| 11539  | Adora1  | -0.60 | 1.06  | 0.87  | 0.72  | 1.80  | 0.3878 | 0.0269 | 0.0578 | 0.0659 | 0.0022 | adenosine A1 receptor                              |
| 11539  | Adora1  | 0.27  | -0.07 | 0.12  | 0.15  | 0.13  | 0.4985 | 0.3536 | 0.5093 | 0.1741 | 0.0902 | adenosine A1 receptor                              |
| 11540  | Adora2a | -0.47 | 0.47  | 0.13  | -0.29 | -0.49 | 0.3942 | 0.1686 | 0.3263 | 0.2063 | 0.0246 | adenosine A2a receptor                             |
| 11540  | Adora2a | 0.29  | 0.15  | 0.73  | 0.16  | -0.03 | 0.5887 | 0.5023 | 0.5522 | 0.3634 | 0.4640 | adenosine A2a receptor                             |
| 11542  | Adora2b | 0.64  | 0.31  | 1.20  | 1.00  | 1.63  | 0.1853 | 0.5522 | 0.0241 | 0.0005 | 0.0000 | adenosine A2b receptor                             |
| 11542  | Adora3  | 0.24  | -0.05 | -0.16 | -0.11 | -0.09 | 0.1657 | 0.3866 | 0.0919 | 0.1901 | 0.1786 |                                                    |

|        |          |       |       |       |       |       |        |        |        |        |        |                                                       |
|--------|----------|-------|-------|-------|-------|-------|--------|--------|--------|--------|--------|-------------------------------------------------------|
| 432530 | Adcy1    | 0.08  | 0.73  | 0.02  | 0.05  | -0.04 | 0.5663 | 0.4589 | 0.4878 | 0.4250 | 0.3510 | adenylate cyclase 1                                   |
| 271639 | Adcy10   | -0.03 | -0.02 | 0.07  | -0.04 | -0.12 | 0.6267 | 0.6437 | 0.5273 | 0.4888 | 0.1537 | adenylate cyclase 10                                  |
| 210044 | Adcy2    | 0.41  | -0.08 | 0.55  | 0.66  | 0.68  | 0.3345 | 0.3994 | 0.1921 | 0.0108 | 0.0030 | adenylate cyclase 2                                   |
| 210044 | Adcy2    | 0.00  | -0.28 | 0.34  | 0.71  | 0.81  | 0.7037 | 0.6233 | 0.2087 | 0.0040 | 0.0014 | adenylate cyclase 2                                   |
| 104111 | Adcy3    | 0.53  | -0.30 | 0.14  | 0.50  | 0.74  | 0.0853 | 0.2590 | 0.5476 | 0.0059 | 0.0001 | adenylate cyclase 3                                   |
| 104111 | Adcy3    | 0.49  | -0.11 | 0.13  | 0.54  | 0.93  | 0.2141 | 0.5122 | 0.6148 | 0.0040 | 0.0001 | adenylate cyclase 3                                   |
| 104110 | Adcy4    | -1.58 | 0.48  | 0.24  | -0.10 | -0.19 | 0.0069 | 0.3080 | 0.5939 | 0.4243 | 0.1866 | adenylate cyclase 4                                   |
| 224129 | Adcy5    | 0.63  | -0.20 | 0.19  | 0.56  | 0.85  | 0.0968 | 0.4281 | 0.5207 | 0.0301 | 0.0000 | adenylate cyclase 5                                   |
| 224129 | Adcy5    | 0.51  | 0.05  | 0.36  | 0.46  | 0.87  | 0.1513 | 0.6393 | 0.2635 | 0.0322 | 0.0001 | adenylate cyclase 5                                   |
| 11512  | Adcy6    | 0.33  | 0.70  | 0.16  | -0.11 | -0.43 | 0.4387 | 0.0276 | 0.3514 | 0.4553 | 0.0798 | adenylate cyclase 6                                   |
| 11513  | Adcy7    | 0.23  | -1.13 | -0.93 | -0.08 | -0.44 | 0.5091 | 0.0170 | 0.0014 | 0.4937 | 0.0847 | adenylate cyclase 7                                   |
| 11513  | Adcy7    | 0.03  | -1.00 | -0.54 | 0.41  | 0.15  | 0.6916 | 0.2834 | 0.5579 | 0.1686 | 0.3624 | adenylate cyclase 7                                   |
| 11514  | Adcy8    | 0.25  | 0.40  | 0.42  | 0.25  | 0.45  | 0.4352 | 0.3630 | 0.3528 | 0.1956 | 0.0062 | adenylate cyclase 8                                   |
| 11515  | Adcy9    | -0.14 | -0.10 | -0.78 | -0.60 | -0.96 | 0.4754 | 0.3722 | 0.0203 | 0.0011 | 0.0001 | adenylate cyclase 9                                   |
| 11516  | Adcyap1  | 0.09  | -0.04 | -0.07 | 0.00  | -0.05 | 0.4194 | 0.4433 | 0.3578 | 0.5526 | 0.2907 | adenylate cyclase activating polypeptide 1            |
| 11517  | Adcyap11 | 0.24  | 0.01  | -0.07 | -0.03 | -0.07 | 0.4781 | 0.4310 | 0.3145 | 0.4809 | 0.2990 | adenylate cyclase activating polypeptide 1 receptor 1 |
| 11517  | Adcyap11 | -0.11 | 0.05  | -0.04 | -0.05 | -0.05 | 0.5200 | 0.3723 | 0.5620 | 0.4953 | 0.3743 | adenylate cyclase activating polypeptide 1 receptor 1 |
| 11517  | Adcyap11 | -0.11 | 0.05  | -0.04 | -0.05 | -0.05 | 0.5200 | 0.3723 | 0.5620 | 0.4953 | 0.3743 | adenylate cyclase activating polypeptide 1 receptor 1 |
| 11636  | Ak1      | 0.02  | 0.40  | 0.14  | 0.31  | -0.37 | 0.6921 | 0.4340 | 0.6122 | 0.2320 | 0.0987 | adenylate kinase 1                                    |
| 11637  | Ak2      | 0.33  | 0.00  | 0.18  | 0.44  | 0.46  | 0.3127 | 0.6164 | 0.4989 | 0.0061 | 0.0048 | adenylate kinase 2                                    |
| 11637  | Ak2      | 0.33  | 0.00  | 0.18  | 0.44  | 0.46  | 0.3127 | 0.6164 | 0.4989 | 0.0061 | 0.0048 | adenylate kinase 2                                    |
| 56248  | Ak3      | 0.33  | -1.03 | -0.76 | -0.31 | -0.31 | 0.1834 | 0.0003 | 0.0007 | 0.0781 | 0.1292 | adenylate kinase 3 alpha-like 1                       |
| 11639  | Ak3      | 0.01  | -0.14 | -0.05 | -0.03 | -0.01 | 0.6955 | 0.5167 | 0.4946 | 0.4955 | 0.4772 | adenylate kinase 3 alpha-like 1                       |
| 229949 | Ak5      | 0.20  | -0.19 | -0.02 | -0.02 | -0.09 | 0.3420 | 0.2439 | 0.1858 | 0.5038 | 0.1945 | adenylate kinase 5                                    |
| 229949 | Ak5      | 0.10  | -0.03 | 0.02  | 0.07  | 0.07  | 0.4357 | 0.6324 | 0.4991 | 0.2795 | 0.2705 | adenylate kinase 5                                    |
| 229949 | Ak5      | -0.06 | 0.01  | -0.06 | -0.02 | 0.07  | 0.5619 | 0.6049 | 0.5845 | 0.5263 | 0.3381 | adenylate kinase 5                                    |
| 78901  | Ak7      | 0.82  | -0.53 | -1.37 | -0.35 | -0.39 | 0.1287 | 0.2352 | 0.0043 | 0.1135 | 0.0968 | adenylate kinase 7                                    |
| 78901  | Ak7      | 0.02  | 0.10  | -0.16 | 0.04  | 0.18  | 0.2837 | 0.4445 | 0.4206 | 0.4862 | 0.1373 | adenylate kinase 7                                    |
| 78901  | Ak7      | 0.02  | -0.03 | -0.13 | -0.17 | -0.10 | 0.6625 | 0.4183 | 0.1678 | 0.0229 | 0.181  | adenylate kinase 7                                    |
| Adsl   | Adsl     | 0.17  | -0.61 | -0.49 | 0.16  | 0.31  | 0.5842 | 0.1080 | 0.1222 | 0.4573 | 0.2281 | adenylosuccinate lyase                                |
| 11565  | Adss     | 0.42  | 0.05  | 0.10  | 0.50  | 0.27  | 0.1667 | 0.5978 | 0.6436 | 0.1116 | 0.2016 | adenylosuccinate synthetase like 1                    |
| 11566  | Adss     | 0.39  | 0.16  | 0.77  | 0.70  | 1.23  | 0.1057 | 0.3921 | 0.0006 | 0.0009 | 0.0000 | adenylosuccinate synthetase, non muscle               |
| 11566  | Adss     | 0.36  | 0.16  | 0.77  | 0.70  | 1.23  | 0.1057 | 0.3921 | 0.0006 | 0.0009 | 0.0000 | adenylosuccinate synthetase, non muscle               |
| 229715 | Angpt1   | 0.23  | -0.12 | -0.01 | 0.40  | 0.30  | 0.2173 | 0.6206 | 0.4495 | 0.0687 | 0.0000 | adenylosuccinate synthetase, non muscle               |
| 229715 | Angpt1   | 0.23  | -0.12 | -0.01 | 0.40  | 0.30  | 0.2173 | 0.6206 | 0.4495 | 0.0687 | 0.0000 | adenylosuccinate synthetase, non muscle               |
| 229715 | Angpt1   | 0.23  | -0.12 | -0.01 | 0.40  | 0.30  | 0.2173 | 0.6206 | 0.4495 | 0.0687 | 0.0000 | adenylosuccinate synthetase, non muscle               |
| 105927 | Angpt2   | 0.10  | 0.28  | 0.08  | 0.32  | 0.26  | 0.4436 | 0.0624 | 0.2990 | 0.0434 | 0.0046 | adhesion molecule with lg like domain 1               |
| 320844 | Angpt3   | 0.02  | 0.08  | 0.10  | 0.28  | 0.30  | 0.6279 | 0.1878 | 0.1470 | 0.0101 | 0.0002 | adhesion molecule with lg like domain 2               |
| 270152 | Amca1    | -0.52 | 0.99  | 1.16  | 0.72  | 0.83  | 0.0525 | 0.0029 | 0.0001 | 0.0003 | 0.0000 | adhesion molecule with lg like domain 3               |
| 56436  | Amc1     | -0.25 | 0.93  | 0.33  | -0.14 | -0.57 | 0.3527 | 0.2256 | 0.5876 | 0.3899 | 0.0410 | adhesion molecule, interacts with CXADR antigen 1     |
| 56436  | Amc1     | 0.14  | 0.10  | 0.51  | 0.60  | 0.87  | 0.3392 | 0.2010 | 0.0882 | 0.5324 | 0.1729 | adhesion regulating molecule 1                        |
| 72874  | Adipr1   | 0.71  | -0.09 | 0.01  | 0.37  | 0.48  | 0.0722 | 0.3896 | 0.5074 | 0.0300 | 0.0002 | adiponectin receptor 1                                |
| 72874  | Adipr1   | 0.68  | 0.01  | 0.38  | 0.49  | 0.91  | 0.2232 | 0.5094 | 0.5094 | 0.0816 | 0.0007 | adiponectin receptor 1                                |
| 72874  | Adipr1   | -0.34 | 1.73  | 2.43  | 1.79  | 2.50  | 0.2676 | 0.0005 | 0.0000 | 0.0000 | 0.0000 | adiponectin receptor 1                                |
| 68465  | Adipr2   | -0.12 | -0.08 | 0.12  | 0.03  | 0.14  | 0.3812 | 0.3149 | 0.2868 | 0.4833 | 0.1067 | adiponectin receptor 2                                |
| 68465  | Adipr2   | 0.27  | -0.46 | -0.29 | 0.18  | 0.55  | 0.4938 | 0.2214 | 0.3247 | 0.4021 | 0.0332 | adiponectin receptor 2                                |
| 68465  | Adipr2   | 0.23  | -0.01 | -0.09 | -0.30 | -0.14 | 0.5255 | 0.4581 | 0.3564 | 0.1206 | 0.2807 | adiponectin receptor 2                                |
| 11450  | Adipoq   | 1.60  | -1.75 | -1.59 | 1.04  | -0.08 | 0.4303 | 0.5267 | 0.5550 | 0.2633 | 0.4732 | adiponectin, C1Q and collagen domain containing       |
| 11520  | Adip     | -0.40 | 0.10  | 0.15  | -0.20 | 0.11  | 0.3791 | 0.5910 | 0.6188 | 0.2263 | 0.3212 | adipose differentiation related protein               |
| 240442 | Adnp2    | 0.21  | -0.27 | -0.33 | -0.16 | -0.19 | 0.3324 | 0.0760 | 0.0266 | 0.2263 | 0.0822 | ADNP homeobox 2                                       |
| 72141  | Adpgk    | -0.43 | 0.17  | -0.29 | -0.18 | -0.57 | 0.4364 | 0.3115 | 0.6254 | 0.2712 | 0.0208 | ADNP homeobox 2                                       |
| 11544  | Adph     | -0.27 | 0.25  | -0.02 | -0.25 | -0.43 | 0.3774 | 0.4944 | 0.4842 | 0.0411 | 0.0051 | ADP-dependent glucokinase                             |
| 11544  | Adph     | -0.64 | -0.22 | -0.03 | 0.13  | 0.65  | 0.4763 | 0.5023 | 0.5987 | 0.0237 | 0.0031 | ADP-ribosylarginine hydrolase                         |
| 11544  | Adph     | 0.02  | 0.00  | 0.01  | 0.20  | 0.23  | 0.6600 | 0.5329 | 0.4753 | 0.0483 | 0.4233 | ADP-ribosylarginine hydrolase                         |
| 11544  | Adph     | 0.90  | -0.43 | -0.02 | 0.67  | 0.78  | 0.0731 | 0.2033 | 0.5056 | 0.0156 | 0.0174 | ADP-ribosylarginine hydrolase                         |
| 11840  | Ar1      | 0.88  | -0.39 | 0.29  | 0.78  | 0.99  | 0.2601 | 0.5324 | 0.0449 | 0.0002 | 0.0012 | ADP-ribosylation factor 1                             |
| 11841  | Ar2      | 0.32  | 0.51  | 0.85  | 0.77  | 1.16  | 0.1126 | 0.0474 | 0.3841 | 0.0030 | 0.0019 | ADP-ribosylation factor 1                             |
| 11842  | Ar3      | 0.25  | 0.21  | 0.48  | 0.85  | 0.72  | 0.4975 | 0.6003 | 0.3641 | 0.0003 | 0.0000 | ADP-ribosylation factor 2                             |
| 11842  | Ar3      | -0.10 | -0.04 | -0.01 | -0.02 | -0.08 | 0.5446 | 0.6409 | 0.6077 | 0.5052 | 0.0003 | ADP-ribosylation factor 3                             |
| 11843  | Ar4      | 0.80  | -0.77 | -0.22 | 0.53  | 0.62  | 0.1932 | 0.0521 | 0.3921 | 0.1016 | 0.3443 | ADP-ribosylation factor 3                             |
| 11844  | Ar5      | 0.00  | 0.27  | 0.51  | 0.48  | 0.45  | 0.7022 | 0.1856 | 0.0592 | 0.0247 | 0.0168 | ADP-ribosylation factor 4                             |
| 11845  | Ar6      | 0.62  | 0.84  | 1.46  | 1.77  | 2.10  | 0.1206 | 0.0857 | 0.0082 | 0.0001 | 0.0000 | ADP-ribosylation factor 5                             |
| 11845  | Ar6      | 0.68  | 0.86  | 0.88  | 1.05  | 1.05  | 0.2371 | 0.0882 | 0.0524 | 0.0076 | 0.0028 | ADP-ribosylation factor 6                             |
| 228998 | Arfgap1  | 0.19  | -0.37 | -0.05 | 0.04  | 0.06  | 0.5183 | 0.1480 | 0.4642 | 0.5136 | 0.3945 | ADP-ribosylation factor GTPase activating protein 1   |
| 228998 | Arfgap1  | -0.08 | 0.45  | 0.61  | 0.41  | 0.50  | 0.5275 | 0.0891 | 0.0309 | 0.0028 | 0.0033 | ADP-ribosylation factor GTPase activating protein 1   |
| 228998 | Arfgap1  | -0.03 | 0.16  | 0.10  | 0.14  | 0.22  | 0.6557 | 0.2272 | 0.4218 | 0.2871 | 0.0812 | ADP-ribosylation factor GTPase activating protein 1   |
| 77038  | Arfgap2  | -0.77 | 0.33  | 0.32  | 0.23  | 0.11  | 0.4103 | 0.2672 | 0.2509 | 0.0315 | 0.1877 | ADP-ribosylation factor GTPase activating protein 2   |
| 77038  | Arfgap2  | -0.30 | 0.28  | 0.50  | 0.48  | 0.53  | 0.5122 | 0.2488 | 0.1159 | 0.0238 | 0.0039 | ADP-ribosylation factor GTPase activating protein 2   |

|        |         |       |       |       |       |       |        |        |        |        |                                                             |
|--------|---------|-------|-------|-------|-------|-------|--------|--------|--------|--------|-------------------------------------------------------------|
| 70317  | At16    | 0.08  | -0.19 | -0.13 | -0.08 | -0.04 | 0.5660 | 0.3145 | 0.5058 | 0.3192 | 0.3758 ADP-ribosylation factor-like 16                      |
| 56327  | At2     | -0.15 | -0.18 | -0.27 | 0.30  | 0.21  | 0.6585 | 0.4940 | 0.5105 | 0.0408 | 0.1082 ADP-ribosylation factor-like 2                       |
| 56327  | At2     | -0.09 | -0.07 | -0.11 | 0.28  | 0.25  | 0.6676 | 0.4567 | 0.4622 | 0.1341 | 0.1124 ADP-ribosylation factor-like 2                       |
| 107566 | At2bp   | 0.49  | 0.46  | 0.73  | 0.91  | 1.00  | 0.1179 | 0.0951 | 0.1077 | 0.0011 | 0.0001 ADP-ribosylation factor-like 2 binding protein       |
| 107566 | At2bp   | 0.53  | 0.31  | 0.30  | 0.48  | 0.88  | 0.1825 | 0.4841 | 0.4570 | 0.0033 | 0.0000 ADP-ribosylation factor-like 3                       |
| 56350  | At3     | -0.04 | 0.23  | -0.23 | -0.18 | -0.10 | 0.6708 | 0.6093 | 0.3212 | 0.2844 | 0.3442 ADP-ribosylation factor-like 3                       |
| 11861  | At4a    | 0.53  | 0.62  | 0.78  | 0.88  | 1.55  | 0.2086 | 0.2887 | 0.1179 | 0.0018 | 0.0001 ADP-ribosylation factor-like 4A                      |
| 11861  | At4a    | 0.21  | -0.06 | 0.20  | 0.53  | 0.77  | 0.3741 | 0.4320 | 0.5190 | 0.0009 | 0.0000 ADP-ribosylation factor-like 4A                      |
| 320882 | At4a    | 0.06  | 0.97  | 0.89  | 0.63  | 0.97  | 0.6434 | 0.0083 | 0.0257 | 0.0018 | 0.0004 ADP-ribosylation factor-like 4A                      |
| 320882 | At4a    | 0.31  | 0.18  | 0.92  | 0.78  | 0.60  | 0.4081 | 0.6381 | 0.0394 | 0.0040 | 0.0003 ADP-ribosylation factor-like 4C                      |
| 320882 | At4a    | -0.64 | 0.32  | 0.21  | 0.03  | -0.27 | 0.5334 | 0.3021 | 0.3145 | 0.5265 | 0.3381 ADP-ribosylation factor-like 4C                      |
| 80981  | At4d    | -1.05 | 1.95  | 0.89  | 0.69  | 0.24  | 0.3292 | 0.0219 | 0.1086 | 0.1312 | 0.3135 ADP-ribosylation factor-like 4D                      |
| 75423  | At5a    | 0.67  | -0.47 | -0.13 | 0.54  | 0.89  | 0.0853 | 0.2321 | 0.5407 | 0.0061 | 0.0006 ADP-ribosylation factor-like 5A                      |
| 75423  | At5a    | 0.18  | -0.04 | 0.14  | 0.10  | 0.21  | 0.3561 | 0.5711 | 0.3813 | 0.2540 | 0.0352 ADP-ribosylation factor-like 5A                      |
| 75989  | At5b    | -0.19 | 0.75  | 1.08  | -0.10 | 0.38  | 0.4198 | 0.0178 | 0.2908 | 0.1307 | 0.0115 ADP-ribosylation factor-like 5B                      |
| 75989  | At5b    | -1.24 | -0.44 | -0.20 | -0.30 | -0.16 | 0.4774 | 0.0062 | 0.2064 | 0.1307 | 0.2395 ADP-ribosylation factor-like 5B                      |
| 75989  | At5b    | 0.15  | -0.04 | -0.07 | -0.08 | -0.08 | 0.6432 | 0.3932 | 0.3130 | 0.0691 | 0.2487 ADP-ribosylation factor-like 5B                      |
| 75989  | At5b    | -0.02 | 0.05  | -0.07 | -0.08 | -0.08 | 0.6466 | 0.0867 | 0.2633 | 0.2386 | 0.2049 ADP-ribosylation factor-like 5B                      |
| 75989  | At5b    | 0.03  | 0.29  | 0.54  | 0.24  | 0.32  | 0.5356 | 0.6584 | 0.5472 | 0.5509 | 0.0034 ADP-ribosylation factor-like 5B                      |
| 217151 | At5c    | -0.15 | 0.00  | -0.48 | -0.01 | -0.36 | 0.5356 | 0.5472 | 0.0275 | 0.5509 | 0.0111 ADP-ribosylation factor-like 5C                      |
| 217151 | At5c    | 0.07  | 0.08  | 0.11  | -0.02 | -0.32 | 0.6031 | 0.5646 | 0.6011 | 0.5072 | 0.4339 ADP-ribosylation factor-like 5C                      |
| 56297  | At6     | 0.86  | -0.68 | -0.90 | 0.06  | 0.02  | 0.0361 | 0.0688 | 0.0108 | 0.4855 | 0.0577 ADP-ribosylation factor-like 6                       |
| 56297  | At6     | -0.54 | -0.79 | -0.49 | 0.04  | 0.19  | 0.0958 | 0.0715 | 0.5216 | 0.5072 | 0.2394 ADP-ribosylation factor-like 6                       |
| 54208  | At6p1   | -1.75 | -3.35 | -0.43 | -0.58 | -0.56 | 0.1506 | 0.5637 | 0.5807 | 0.0125 | 0.0017 ADP-ribosylation factor-like 6 interacting protein 1 |
| 56298  | At6p2   | 0.50  | 0.11  | 0.37  | 0.49  | 0.70  | 0.0260 | 0.5075 | 0.1691 | 0.0003 | 0.0001 ADP-ribosylation factor-like 6 interacting protein 2 |
| 56298  | At6p2   | -0.16 | 0.37  | 0.10  | -0.11 | 0.04  | 0.4702 | 0.0580 | 0.2518 | 0.2773 | 0.4058 ADP-ribosylation factor-like 6 interacting protein 2 |
| 56298  | At6p2   | -0.04 | -0.11 | 0.25  | 0.47  | 0.46  | 0.6921 | 0.4663 | 0.2592 | 0.0775 | 0.0227 ADP-ribosylation factor-like 6 interacting protein 2 |
| 65105  | At6p4   | -1.11 | 0.15  | 0.06  | -0.23 | -0.32 | 0.3368 | 0.3475 | 0.3549 | 0.1363 | 0.0080 ADP-ribosylation factor-like 6 interacting protein 4 |
| 65105  | At6p5   | -0.16 | 0.01  | -0.10 | -0.34 | -0.45 | 0.4524 | 0.4952 | 0.3021 | 0.0034 | 0.0072 ADP-ribosylation factor-like 6 interacting protein 4 |
| 65106  | At6p5   | 0.18  | 0.28  | 0.61  | 0.56  | 0.66  | 0.4966 | 0.5040 | 0.0923 | 0.0075 | 0.0002 ADP-ribosylation factor-like 6 interacting protein 5 |
| 65103  | At6p6   | -0.18 | -0.08 | -0.47 | -0.08 | -0.19 | 0.4278 | 0.3639 | 0.3169 | 0.0759 | 0.3460 ADP-ribosylation factor-like 6 interacting protein 6 |
| 65103  | At6p6   | -0.38 | -0.54 | -0.47 | -0.52 | -0.32 | 0.4762 | 0.5432 | 0.5808 | 0.0011 | 0.0197 ADP-ribosylation factor-like 6 interacting protein 6 |
| 65103  | At6p6   | -0.09 | 0.19  | 0.07  | -0.24 | -0.27 | 0.5871 | 0.5467 | 0.6024 | 0.1146 | 0.0726 ADP-ribosylation factor-like 6 interacting protein 6 |
| 68724  | At8a    | 0.05  | 0.05  | 0.08  | 0.06  | 0.37  | 0.5396 | 0.3889 | 0.3530 | 0.4654 | 0.0416 ADP-ribosylation factor-like 8A                      |
| 67166  | At8b    | 0.39  | 0.23  | 0.32  | 0.37  | 0.55  | 0.6625 | 0.2463 | 0.3077 | 0.0186 | 0.0076 ADP-ribosylation factor-like 8B                      |
| 67166  | At8b    | -0.11 | 0.40  | 0.63  | 0.66  | 0.85  | 0.2328 | 0.4673 | 0.1312 | 0.0049 | 0.0006 ADP-ribosylation factor-like 8B                      |
| At8bp1 |         | 0.03  | -0.47 | -0.28 | -0.08 | -0.01 | 0.6895 | 0.5326 | 0.6333 | 0.3085 | 0.4669 ADP-ribosylation factor-like 8B                      |
| 234072 | Adphn1  | 0.08  | 0.20  | 0.17  | 0.39  | 0.01  | 0.6336 | 0.6529 | 0.6171 | 0.1751 | 0.4772 ADP-ribosylhydrolase like 1                          |
| 100206 | Adphn2  | 0.29  | 0.08  | 0.06  | 0.46  | 0.50  | 0.4428 | 0.5464 | 0.6122 | 0.0275 | 0.0153 ADP-ribosylhydrolase like 2                          |
| 11870  | At1     | -0.23 | 0.03  | 0.15  | 0.46  | -0.01 | 0.4249 | 0.5487 | 0.6122 | 0.2256 | 0.4877 ADP-ribosyltransferase 1                             |
| 11871  | At2a    | 0.07  | 0.04  | -0.08 | 0.08  | 0.09  | 0.4484 | 0.5344 | 0.3482 | 0.2570 | 0.1732 ADP-ribosyltransferase 2a                            |
| 11872  | At2b    | -0.04 | 0.05  | -0.07 | -0.11 | -0.14 | 0.5558 | 0.5820 | 0.3318 | 0.1257 | 0.0670 ADP-ribosyltransferase 2b                            |
| 109979 | At3     | -0.16 | -0.18 | 0.29  | 0.52  | 0.61  | 0.6033 | 0.5780 | 0.2279 | 0.0319 | 0.0032 ADP-ribosyltransferase 3                             |
| 11875  | At4     | -0.47 | -0.11 | -0.12 | -0.33 | -0.33 | 0.5090 | 0.0435 | 0.3578 | 0.3770 | 0.0583 ADP-ribosyltransferase 4                             |
| 11875  | At5     | -0.37 | -0.12 | -0.45 | -0.96 | -1.42 | 0.6245 | 0.5822 | 0.5953 | 0.2167 | 0.4798 ADP-ribosyltransferase 5                             |
| 110355 | Atbk1   | -0.03 | 0.02  | 0.45  | 0.53  | 1.00  | 0.6831 | 0.5274 | 0.2467 | 0.0672 | 0.0005 adrenergic receptor kinase, beta 1                   |
| 110355 | Atbk1   | -0.03 | 0.02  | 0.45  | 0.53  | 1.00  | 0.6831 | 0.5274 | 0.2467 | 0.0672 | 0.0005 adrenergic receptor kinase, beta 1                   |
| 320129 | Atbk2   | -0.22 | 0.12  | 0.13  | -0.19 | -0.11 | 0.1624 | 0.4375 | 0.2675 | 0.0168 | 0.0010 adrenergic receptor kinase, beta 1                   |
| 320129 | Atbk2   | 0.21  | -0.11 | -0.10 | 0.01  | -0.09 | 0.4377 | 0.3845 | 0.2895 | 0.5532 | 0.1028 adrenergic receptor kinase, beta 1                   |
| 320129 | Atbk2   | 0.10  | 0.60  | 0.08  | -0.32 | -0.39 | 0.6284 | 0.3214 | 0.5192 | 0.0568 | 0.3655 adrenergic receptor kinase, beta 2                   |
| 11549  | Adria1a | -0.10 | -0.08 | 0.02  | -0.01 | -0.01 | 0.3082 | 0.3036 | 0.6053 | 0.5183 | 0.0048 adrenergic receptor kinase, beta 2                   |
| 11549  | Adria1b | -0.54 | 1.11  | 1.33  | 0.53  | 0.21  | 0.4295 | 0.0365 | 0.0915 | 0.4544 | 0.4720 adrenergic receptor, alpha 1a                        |
| 11549  | Adria1b | -0.09 | 0.00  | 0.18  | 0.09  | 0.15  | 0.5256 | 0.4611 | 0.4903 | 0.2428 | 0.3817 adrenergic receptor, alpha 1b                        |
| 11549  | Adria1d | 0.40  | -0.31 | 0.13  | -0.04 | -0.11 | 0.4315 | 0.2000 | 0.5245 | 0.4836 | 0.1903 adrenergic receptor, alpha 1d                        |
| 11550  | Adria1d | 0.11  | -0.02 | 0.08  | 0.06  | 0.06  | 0.4304 | 0.5157 | 0.5676 | 0.2965 | 0.2628 adrenergic receptor, alpha 1d                        |
| 11551  | Adria2a | -0.16 | -0.38 | -0.74 | -0.65 | -0.91 | 0.6108 | 0.5702 | 0.2628 | 0.0122 | 0.0003 adrenergic receptor, alpha 2a                        |
| 11551  | Adria2a | -0.07 | -0.49 | -0.72 | -0.65 | -0.81 | 0.6650 | 0.4637 | 0.2703 | 0.0050 | 0.0004 adrenergic receptor, alpha 2a                        |
| 11552  | Adria2b | -0.05 | 0.06  | -0.01 | 0.05  | 0.05  | 0.3941 | 0.5488 | 0.4097 | 0.5087 | 0.3086 adrenergic receptor, alpha 2b                        |
| 11553  | Adria2c | 0.00  | 0.04  | 0.00  | 0.05  | -0.01 | 0.6984 | 0.4506 | 0.5484 | 0.4589 | 0.4700 adrenergic receptor, alpha 2c                        |
| 11554  | Adri1   | -0.29 | 0.01  | 0.02  | 0.20  | 0.45  | 0.4013 | 0.4455 | 0.5087 | 0.3355 | 0.0549 adrenergic receptor, beta 1                          |
| 11555  | Adri2   | -0.49 | 0.68  | 0.52  | -0.04 | 0.09  | 0.3204 | 0.2208 | 0.2577 | 0.5114 | 0.3723 adrenergic receptor, beta 1                          |
| 497652 | Accl    | 0.16  | 0.00  | -0.08 | -0.12 | -0.04 | 0.4776 | 0.3478 | 0.2691 | 0.1228 | 0.2967 adrenergic receptor, beta 2                          |
| 11556  | Adri3   | 0.11  | -0.06 | -0.08 | -0.12 | -0.04 | 0.4556 | 0.4571 | 0.4447 | 0.2571 | 0.1950 adrenocortical dysplasia                             |
| 11535  | Adm     | 0.57  | 3.03  | 3.04  | 2.53  | 3.10  | 0.3968 | 0.0029 | 0.0012 | 0.0000 | 0.0000 adrenomedullin 2                                     |
| 223780 | Adm2    | 0.00  | -0.01 | -0.01 | -0.09 | -0.09 | 0.5581 | 0.5581 | 0.5072 | 0.1880 | 0.1201 adrenomedullin 2                                     |
| 11596  | Agar    | -1.08 | 0.44  | 0.62  | 0.35  | 0.36  | 0.3767 | 0.2475 | 0.1680 | 0.0652 | 0.0041 AE binding protein 1                                 |
| 11567  | Avil    | -0.11 | -0.09 | 0.00  | -0.03 | 0.19  | 0.4561 | 0.5378 | 0.5726 | 0.4839 | 0.0001 AE binding protein 1                                 |
| 11568  | Aebp1   | 0.39  | -0.15 | 0.36  | 0.77  | 0.97  | 0.1657 | 0.3067 | 0.4769 | 0.1837 | 0.0024 AF-4FMR2 family, member 1                            |
| 11569  | Aebp2   | 0.30  | -0.11 | -0.05 | 0.10  | 0.27  | 0.3462 | 0.4977 | 0.3847 | 0.0122 | 0.0041 AE binding protein 2                                 |
| 11569  | Aebp2   | -0.02 | 0.30  | 0.23  | -0.19 | -0.09 | 0.6219 | 0.0296 | 0.0202 | 0.1067 | 0.0824 AF-4FMR2 family, member 1                            |
| 17355  | Atf1    | -0.08 | 0.55  | 0.70  | 0.40  | 0.39  | 0.6763 | 0.3864 | 0.5035 | 0.0681 | 0.0168 AF-4FMR2 family, member 1                            |
| 17355  | Atf1    | 0.01  | 0.08  | 0.23  | 0.06  | 0.17  | 0.6925 | 0.6401 | 0.3287 | 0.2791 | 0.3861 AF-4FMR2 family, member 2                            |
| 17355  | Atf1    | -0.01 | -0.11 | -0.01 | -0.09 | -0.03 | 0.6927 | 0.2930 | 0.5072 | 0.2624 | 0.3923 AF-4FMR2 family, member 2                            |
| 14266  | Atf2    | 0.05  | -0.08 | 0.15  | -0.09 | 0.03  | 0.6175 | 0.2748 | 0.5072 | 0.2624 | 0.4733 AF-4FMR2 family, member 2                            |
| 14266  | Atf2    | -0.02 | -0.04 | -0.04 | 0.01  | -0.02 | 0.6400 | 0.5293 | 0.3126 | 0.0704 | 0.4314 AF-4FMR2 family, member 2                            |
| 93736  | Atf4    | 0.75  | -0.61 | -0.12 | 0.16  | 0.60  | 0.6664 | 0.4699 | 0.4994 | 0.4224 | 0.0045 AF-4FMR2 family, member 4                            |
| 93736  | Atf4    | -0.25 | 0.34  | 1.05  | 0.13  | 0.26  | 0.3943 | 0.0367 | 0.3301 | 0.4138 | 0.1853 AF-4FMR2 family, member 4                            |
| 93736  | Atf4    | 0.27  | 0.62  | 0.62  | 0.09  | -0.02 | 0.4104 | 0.0120 | 0.4138 | 0.3694 | 0.0047 AF-4FMR2 family, member 4                            |
| 93736  | Atf4    | -0.04 | 0.27  | 0.62  | 0.09  | -0.02 | 0.4104 | 0.0120 | 0.4138 | 0.3694 | 0.0047 AF-4FMR2 family, member 4                            |
| 280662 | Atm     | -0.11 | 0.05  | -0.04 | -0.10 | -0.04 | 0.6675 | 0.3376 | 0.6337 | 0.2436 | 0.3668 aflatinin                                            |
| 280662 | Atm     | -0.10 | 0.05  | -0.04 | -0.10 | -0.04 | 0.3923 | 0.4821 | 0.5029 | 0.2352 | 0.2918 aflatinin                                            |
| 14896  | Atg31   | 0.04  | 0.09  | 0.06  | 0.05  | 0.20  | 0.5825 | 0.5401 | 0.3313 | 0.3306 | 0.2945 AFG3(ATPase family gene 3)-like 1 (yeast)            |
| 14896  | Atg31   | 0.04  | 0.09  | 0.06  | 0.05  | 0.20  | 0.5825 | 0.5401 | 0.3313 | 0.3306 | 0.2945 AFG3(ATPase family gene 3)-like 1 (yeast)            |
| 14896  | Atg31   | 0.02  | -0.16 | -0.35 | -0.42 | 0.28  | 0.6765 | 0.3790 | 0.5178 | 0.2901 | 0.1659 AFG3(ATPase family gene 3)-like 1 (yeast)            |
| 69597  | Atg32   | 0.37  | 0.30  | 0.43  | 0.60  | 0.84  | 0.6792 | 0.3115 | 0.0589 | 0.0103 | 0.0002 AFG3(ATPase family gene 3)-like 2 (yeast)            |
| 69597  | Atg32   | 0.08  | 0.00  | 0.13  | 0.04  | 0.19  | 0.3967 | 0.5690 | 0.4333 | 0.0076 | 0.0599 AFG3(ATPase family gene 3)-like 2 (yeast)            |
| 216549 | Atph    | -0.07 | -0.15 | 0.04  | 0.17  | 0.25  | 0.5963 | 0.6065 | 0.4242 | 0.0598 | 0.0253 atpaphlin                                            |
| 216549 | Atph    | -0.08 | 0.17  | -0.09 | -0.36 | -0.06 | 0.6158 | 0.6467 | 0.3125 | 0.0149 | 0.2515 atpaphlin                                            |
|        |         | 0.05  | 0.47  | 0.50  | -0.08 | 0.16  | 0.6627 | 0.2212 | 0.2056 | 0.4527 | 0.2596 atpaphlin                                            |

|          |         |       |       |       |       |       |        |        |        |        |                                                                       |
|----------|---------|-------|-------|-------|-------|-------|--------|--------|--------|--------|-----------------------------------------------------------------------|
| 11595    | Acan    | -0.10 | 0.08  | 0.56  | 0.11  | -0.04 | 0.6368 | 0.5940 | 0.3024 | 0.4808 | 0.4653 aggregran                                                      |
| 75986    | Agnat   | 0.43  | 0.00  | -0.10 | 0.23  | 0.19  | 0.3318 | 0.4125 | 0.2927 | 0.1717 | 0.2211 agmatine ureohydrolase (agmatinase)                            |
| 11604    | Agp     | 0.12  | 0.37  | -0.35 | -0.20 | -0.21 | 0.5479 | 0.3164 | 0.0407 | 0.0625 | 0.0502 agouti related protein                                         |
| 11603    | Agm     | -0.11 | 0.06  | -0.09 | -0.24 | -0.13 | 0.4996 | 0.6335 | 0.2965 | 0.1126 | 0.1711 agm                                                            |
| 11603    | Agm     | -0.12 | -0.42 | -0.20 | 0.04  | 0.20  | 0.5692 | 0.1390 | 0.3882 | 0.5087 | 0.1754 agm                                                            |
| 217737   | Aha1    | -0.04 | -0.04 | 0.09  | 0.00  | -0.02 | 0.6062 | 0.5306 | 0.2910 | 0.5613 | 0.4477 agm                                                            |
| 268390   | Ahsa2   | 0.02  | -0.31 | -0.50 | -0.38 | -0.38 | 0.6857 | 0.4662 | 0.1846 | 0.0086 | 0.0073 AHA1, activator of heat shock protein ATPase homolog 1 (yeast) |
| 66395    | Ahnak   | 0.21  | -0.10 | -0.52 | -0.38 | -0.43 | 0.4086 | 0.2966 | 0.0165 | 0.0060 | 0.0020 AHA1, activator of heat shock protein ATPase homolog 2 (yeast) |
| 66395    | Ahnak   | -0.73 | 0.19  | 0.12  | -0.93 | -0.64 | 0.1037 | 0.2912 | 0.3537 | 0.0002 | 0.0017 AHNAK nucleoprotein (desmoyokin)                               |
| 66395    | Ahnak   | -2.17 | 1.60  | 0.83  | -1.48 | -1.52 | 0.1184 | 0.0593 | 0.1514 | 0.0084 | 0.0028 AHNAK nucleoprotein (desmoyokin)                               |
| 66395    | Ahnak   | 0.43  | 0.45  | 0.44  | 0.44  | 1.05  | 0.2231 | 0.2431 | 0.3194 | 0.0427 | 0.0001 AHNAK nucleoprotein (desmoyokin)                               |
| 66395    | Ahnak   | -1.04 | 0.25  | 0.30  | -0.03 | -0.18 | 0.3623 | 0.3099 | 0.2613 | 0.5322 | 0.0003 AHNAK nucleoprotein (desmoyokin)                               |
| 66395    | Ahnak   | -0.36 | 0.97  | 0.78  | -0.76 | -0.34 | 0.5749 | 0.3945 | 0.4582 | 0.0057 | 0.0007 AHNAK nucleoprotein (desmoyokin)                               |
| 66395    | Ahnak   | -0.09 | 0.42  | 1.16  | 1.16  | 1.07  | 0.6675 | 0.5023 | 0.0872 | 0.0051 | 0.0076 AHNAK nucleoprotein (desmoyokin)                               |
| 16475    | Jub     | 0.63  | -0.35 | 0.20  | 0.62  | 0.67  | 0.1088 | 0.1029 | 0.5759 | 0.0036 | 0.0002 jub                                                            |
| 67605    | AK1s1   | -0.06 | 0.39  | 0.80  | 0.63  | 0.89  | 0.6594 | 0.4651 | 0.1151 | 0.0491 | 0.0012 AKT1 substrate 1 (proline-rich)                                |
| 239435   | Aard    | 0.06  | 0.64  | 0.27  | -0.14 | -0.04 | 0.6650 | 0.2741 | 0.5715 | 0.3951 | 0.4266 alanine and arginine rich domain containing protein            |
| 11611    | Agd     | 0.33  | -0.32 | 1.85  | 1.64  | 1.64  | 0.3923 | 0.5502 | 0.2536 | 0.3037 | 0.1879 alanine-glyoxylate aminotransferase                            |
| 268782   | Agx21   | 0.01  | -0.02 | -0.01 | 0.07  | -0.08 | 0.6861 | 0.6393 | 0.6360 | 0.3374 | 0.2431 alanine-glyoxylate aminotransferase 2                          |
| 71760    | Agx211  | 0.08  | -0.00 | -0.10 | 0.07  | 0.08  | 0.4674 | 0.4805 | 0.2340 | 0.3699 | 0.2019 alanine-glyoxylate aminotransferase 2-like 1                   |
| 71760    | Agx212  | -0.08 | -0.02 | -0.03 | -0.14 | -0.11 | 0.5109 | 0.6251 | 0.6391 | 0.1646 | 0.2019 alanine-glyoxylate aminotransferase 2-like 1                   |
| 72947    | Agx22   | 0.15  | 0.00  | -0.27 | 0.09  | -0.07 | 0.5569 | 0.4546 | 0.1362 | 0.3524 | 0.3450 alanine-glyoxylate aminotransferase 2-like 2                   |
| 72947    | Agx222  | -0.08 | -0.27 | -0.32 | -0.27 | -0.15 | 0.5714 | 0.2088 | 0.1123 | 0.0180 | 0.1102 alanine-glyoxylate aminotransferase 2-like 2                   |
| 16790    | Anpep   | 0.00  | -0.18 | -0.56 | -0.18 | -0.15 | 0.7015 | 0.3890 | 0.0612 | 0.2540 | 0.1097 alanyl (membrane) aminopeptidase                               |
| 234734   | Aars    | -0.27 | 0.27  | 0.64  | 1.06  | 1.18  | 0.5677 | 0.3294 | 0.1343 | 0.0015 | 0.0001 alanyl-HRNA synthetase                                         |
| 234734   | Aars    | 0.03  | -0.03 | 0.02  | 0.05  | 0.10  | 0.6153 | 0.5313 | 0.6356 | 0.3779 | 0.1290 alanyl-HRNA synthetase                                         |
| 234734   | Aars    | 0.02  | 0.00  | 0.03  | 0.08  | -0.03 | 0.6681 | 0.5698 | 0.4420 | 0.2428 | 0.3991 alanyl-HRNA synthetase                                         |
| 234734   | Aars    | 0.02  | 0.26  | 0.05  | 0.02  | 0.03  | 0.6681 | 0.0840 | 0.4649 | 0.5144 | 0.4357 alanyl-HRNA synthetase                                         |
| 234734   | Aars    | -0.02 | 0.48  | 0.23  | 0.44  | 0.06  | 0.6793 | 0.1163 | 0.4495 | 0.0167 | 0.3913 alanyl-HRNA synthetase                                         |
| 224805   | Aars2   | -0.70 | 0.40  | 0.13  | 0.02  | -0.18 | 0.3000 | 0.1634 | 0.2922 | 0.5210 | 0.0227 alanyl-HRNA synthetase 2, mitochondrial (putative)             |
| 69884    | Aarsd1  | -0.15 | 0.33  | -0.01 | -0.34 | -0.35 | 0.5724 | 0.5073 | 0.4656 | 0.0826 | 0.0333 alanyl-HRNA synthetase domain containing 1                     |
| 11657    | Alb     | 0.90  | -0.52 | -1.26 | 1.54  | 1.67  | 0.4839 | 0.5888 | 0.3391 | 0.2465 | 0.1228 albumin                                                        |
| 11522    | Adh1    | -0.39 | -0.54 | -0.73 | -0.88 | -1.26 | 0.3410 | 0.0461 | 0.1713 | 0.0081 | 0.0003 alcohol dehydrogenase 1 (class I)                              |
| 11522    | Adh1    | -1.12 | -0.93 | -0.23 | -0.76 | -1.26 | 0.3488 | 0.5865 | 0.6383 | 0.0020 | 0.0004 alcohol dehydrogenase 1 (class I)                              |
| 26876    | Adh4    | 0.02  | -0.07 | -0.03 | 0.02  | -0.01 | 0.6267 | 0.3947 | 0.4845 | 0.5080 | 0.4539 alcohol dehydrogenase 1 (class I)                              |
| Adh6-ps1 | Adh5    | 0.32  | -0.80 | -0.56 | 0.20  | 0.18  | 0.6291 | 0.5662 | 0.6069 | 0.1569 | 0.3874 alcohol dehydrogenase 4 (class II), pi polypeptide             |
| 69117    | Adh6a   | 0.01  | -0.04 | -0.04 | -0.02 | -0.05 | 0.3869 | 0.0246 | 0.0823 | 0.2111 | 0.2477 alcohol dehydrogenase 5 (class III), chi polypeptide           |
| 69117    | Adh6a   | 0.00  | -0.04 | 0.08  | -0.05 | -0.03 | 0.6226 | 0.3563 | 0.4895 | 0.5362 | 0.2721 alcohol dehydrogenase 6 (class V), pseudogene 1                |
| 69117    | Adh6a   | 0.00  | -0.04 | 0.08  | -0.05 | -0.03 | 0.6726 | 0.5983 | 0.5847 | 0.3753 | 0.3693 alcohol dehydrogenase 6A (class V)                             |
| 76187    | Adh7    | -0.46 | -0.12 | -0.10 | 0.09  | 0.19  | 0.6955 | 0.4715 | 0.3006 | 0.2847 | 0.4807 alcohol dehydrogenase 6A (class V)                             |
| 76187    | Adh7    | 0.06  | -0.12 | -0.25 | -0.34 | -0.34 | 0.0129 | 0.5903 | 0.3206 | 0.3152 | 0.0005 alcohol dehydrogenase 7 (class IV), mu or sigma polypeptide    |
| 72535    | Adh1b1  | 0.02  | 0.03  | 0.07  | -0.01 | -0.15 | 0.6503 | 0.5476 | 0.3366 | 0.5350 | 0.0025 alcohol dehydrogenase, iron containing, 1                      |
| 107747   | Adh11   | 0.12  | 0.21  | 0.49  | 0.15  | 0.00  | 0.5721 | 0.4501 | 0.2521 | 0.4006 | 0.3205 alcohol dehydrogenase, iron containing, 1                      |
| 216188   | Adh12   | 0.26  | 0.02  | 0.11  | 0.07  | 0.14  | 0.3655 | 0.4846 | 0.5843 | 0.3776 | 0.1287 aldehyde dehydrogenase 1 family, member B1                     |
| 69748    | Adh16a1 | -0.06 | 0.00  | 0.07  | -0.07 | -0.10 | 0.5044 | 0.6179 | 0.4382 | 0.2917 | 0.4940 aldehyde dehydrogenase 1 family, member L1                     |
| 69748    | Adh16a1 | -0.02 | 0.12  | -0.37 | -0.06 | -0.37 | 0.6850 | 0.6397 | 0.1516 | 0.4468 | 0.1166 aldehyde dehydrogenase 1 family, member L2                     |
| 56454    | Adh18a1 | -0.02 | 0.54  | 0.38  | 0.22  | 0.39  | 0.6929 | 0.3407 | 0.5082 | 0.2487 | 0.1447 aldehyde dehydrogenase 1 family, member L2                     |
| 11669    | Adh2    | -1.78 | 0.92  | 1.15  | 0.87  | 1.59  | 0.2037 | 0.1181 | 0.1449 | 0.2059 | 0.0568 aldehyde dehydrogenase 16 family, member A1                    |
| 76889    | Adh2b1  | 0.31  | 0.13  | 0.91  | 0.78  | 1.05  | 0.4517 | 0.5468 | 0.0004 | 0.0006 | 0.4721 aldehyde dehydrogenase 18 family, member A1                    |
| 621003   | Adh3b2  | 0.21  | 0.18  | -0.50 | -0.27 | -0.54 | 0.5468 | 0.0311 | 0.0162 | 0.0008 | 0.0000 aldehyde dehydrogenase 2, mitochondrial                        |
| 621003   | Adh3b2  | 0.17  | -0.40 | 0.12  | 0.62  | 0.18  | 0.5429 | 0.5780 | 0.0154 | 0.0654 | 0.0008 aldehyde dehydrogenase 2, mitochondrial                        |
| 212647   | Adh3a1  | 0.13  | 0.61  | 0.06  | -0.18 | -0.02 | 0.6219 | 0.3677 | 0.4828 | 0.2276 | 0.0059 aldehyde dehydrogenase 3 family, member B1                     |
| 212647   | Adh3a1  | 0.79  | -0.06 | -0.21 | -0.07 | -0.51 | 0.3201 | 0.5340 | 0.3598 | 0.4773 | 0.2398 aldehyde dehydrogenase 3 family, member B2                     |
| 237320   | Adh4a1  | -0.05 | 0.05  | 0.06  | 0.00  | 0.05  | 0.2313 | 0.4572 | 0.5769 | 0.4698 | 0.4773 aldehyde dehydrogenase 3 family, member B2                     |
| 56752    | Adh9a1  | 0.22  | 0.09  | 0.13  | -0.01 | -0.14 | 0.5887 | 0.4803 | 0.3975 | 0.5607 | 0.0080 aldehyde dehydrogenase 4 family, member A1                     |
| 56752    | Adh9a1  | 0.40  | -0.20 | -0.24 | 0.14  | -0.24 | 0.2071 | 0.0993 | 0.1565 | 0.2799 | 0.3525 aldehyde dehydrogenase 4 family, member A1                     |
| 11668    | Adh1a1  | 0.23  | -0.53 | -0.44 | -0.31 | -0.13 | 0.4551 | 0.0337 | 0.0851 | 0.0676 | 0.2402 aldehyde dehydrogenase 8 family, member A1                     |
| 19378    | Adh1a2  | -0.39 | -0.25 | -0.20 | 0.28  | -0.10 | 0.5667 | 0.5282 | 0.4929 | 0.1792 | 0.1112 aldehyde dehydrogenase 9, subfamily A1                         |
| 56847    | Adh1a3  | -0.18 | 0.17  | 0.75  | 0.25  | 0.81  | 0.5429 | 0.2779 | 0.0131 | 0.2347 | 0.0144 aldehyde dehydrogenase 9, subfamily A1                         |
| 26358    | Adh1a7  | 0.48  | -1.13 | 0.19  | -0.03 | 0.07  | 0.6199 | 0.6362 | 0.2299 | 0.4393 | 0.2562 aldehyde dehydrogenase family 1, subfamily A1                  |
| 11670    | Adh3a1  | 0.16  | -0.09 | 0.16  | -0.38 | -0.64 | 0.1962 | 0.3119 | 0.2005 | 0.0522 | 0.3778 aldehyde dehydrogenase family 1, subfamily A2                  |
| 11671    | Adh3a2  | -0.28 | -0.45 | -0.14 | 0.00  | 0.26  | 0.5797 | 0.6444 | 0.4806 | 0.5627 | 0.0031 aldehyde dehydrogenase family 1, subfamily A3                  |
| 104776   | Adh6a1  | 0.75  | -0.78 | -0.45 | 0.22  | 0.59  | 0.0395 | 0.0086 | 0.0093 | 0.2876 | 0.1871 aldehyde dehydrogenase family 1, subfamily A3                  |
| 110895   | Adh7a1  | 0.13  | -0.04 | -0.03 | 0.20  | 0.12  | 0.4776 | 0.4703 | 0.5094 | 0.1567 | 0.0031 aldehyde dehydrogenase family 3, subfamily A1                  |
| 110895   | Adh7a1  | 0.04  | -0.05 | -0.06 | -0.05 | -0.05 | 0.5953 | 0.4368 | 0.5990 | 0.3504 | 0.1488 aldehyde dehydrogenase family 3, subfamily A2                  |
| 11761    | Aox1    | 0.34  | -0.18 | 0.10  | 0.26  | 0.62  | 0.4274 | 0.4625 | 0.5765 | 0.3241 | 0.0038 aldehyde dehydrogenase family 6, subfamily A1                  |
| 71724    | Aox3    | -0.88 | -0.75 | -0.41 | 0.10  | 0.15  | 0.1657 | 0.0398 | 0.1484 | 0.4998 | 0.3108 aldehyde dehydrogenase family 7, member A1                     |
| 71872    | Aox4    | -0.03 | 0.09  | 0.06  | 0.13  | 0.15  | 0.6320 | 0.2992 | 0.4071 | 0.1477 | 0.0325 aldehyde oxidase 1                                             |
| 214579   | Adh5a1  | -0.60 | 0.32  | 0.16  | 0.08  | 0.15  | 0.4682 | 0.2682 | 0.3267 | 0.4697 | 0.3744 aldehyde oxidase 3                                             |
| 214579   | Adh5a1  | -0.02 | 0.17  | 0.15  | 0.08  | 0.08  | 0.6608 | 0.3074 | 0.1462 | 0.2923 | 0.0819 aldehyde dehydrogenase family 5, subfamily A1                  |
| 58810    | Adh1a4  | -0.61 | -0.06 | 0.08  | 0.10  | 0.06  | 0.4797 | 0.4320 | 0.3475 | 0.3514 | 0.2534 aldehyde dehydrogenase family 5, subfamily A1                  |
| 11677    | Adh1b3  | 0.22  | -0.48 | -0.65 | -0.17 | -0.75 | 0.4289 | 0.0274 | 0.0070 | 0.0163 | 0.3472 aldo-keto reductase family 1, member A4 (aldehyde reductase)   |
| 11677    | Adh1b3  | -0.21 | -0.76 | -0.48 | -0.13 | -0.50 | 0.5825 | 0.2670 | 0.4841 | 0.4373 | 0.0005 aldo-keto reductase family 1, member A4 (aldehyde reductase)   |
| 11677    | Adh1b3  | -0.02 | -0.12 | -0.10 | -0.12 | -0.11 | 0.6700 | 0.3888 | 0.4324 | 0.3712 | 0.0661 aldo-keto reductase family 1, member B3 (aldose reductase)     |
| 11997    | Adh1b7  | 0.46  | -0.22 | -0.51 | -0.09 | -0.26 | 0.1008 | 0.2237 | 0.0133 | 0.3712 | 0.1640 aldo-keto reductase family 1, member B3 (aldose reductase)     |
| 14187    | Adh1b8  | 0.44  | 0.15  | 0.26  | 0.12  | 0.53  | 0.1416 | 0.5680 | 0.3756 | 0.3333 | 0.0237 aldo-keto reductase family 1, member B7                        |
| 622402   | Adh1c12 | -0.12 | -0.23 | -0.40 | -0.37 | -0.50 | 0.1586 | 0.1397 | 0.0246 | 0.0046 | 0.0017 aldo-keto reductase family 1, member B8                        |
| 27384    | Adh1c13 | -0.19 | -0.26 | -0.21 | -0.65 | -0.87 | 0.5232 | 0.2725 | 0.0299 | 0.0016 | 0.0003 aldo-keto reductase family 1, member B8                        |
| 105387   | Adh1c14 | -0.01 | -0.65 | -0.77 | 0.30  | 0.83  | 0.6984 | 0.5990 | 0.2002 | 0.0034 | 0.0004 aldo-keto reductase family 1, member C13                       |
| 105349   | Adh1c18 | -0.13 | -0.06 | -0.06 | 0.04  | 0.07  | 0.4787 | 0.6091 | 0.5897 | 0.4890 | 0.3574 aldo-keto reductase family 1, member C14                       |
| 432720   | Adh1c19 | -0.18 | -0.27 | -0.69 | -0.30 | -0.51 | 0.4617 | 0.1257 | 0.0069 | 0.0438 | 0.0019 aldo-keto reductase family 1, member C18                       |
| 432720   | Adh1c19 | -0.10 | -0.39 | -0.71 | -0.48 | -0.63 | 0.5456 | 0.0850 | 0.0079 | 0.0062 | 0.0019 aldo-keto reductase family 1, member C19                       |
| 116852   | Adh1c20 | 0.10  | 0.10  | 0.04  | 0.25  | 0.21  | 0.5574 | 0.6204 | 0.5024 | 0.3153 | 0.2613 aldo-keto reductase family 1, member C19                       |
| 77337    | Adh1c21 | 0.05  | -0.04 | -0.11 | 0.01  | 0.03  | 0.6066 | 0.3360 | 0.5137 | 0.3696 | 0.0003 aldo-keto reductase family 1, member C20                       |
| 83702    | Adh1c6  | 0.24  | -0.27 | -0.39 | 0.63  | 0.51  | 0.4625 | 0.3510 | 0.4625 | 0.5021 | 0.3421 aldo-keto reductase family 1, member C21                       |
| 208665   | Adh1d1  | -0.05 | -0.01 | 0.03  | -0.03 | -0.04 | 0.5397 | 0.6207 | 0.1644 | 0.3038 | 0.2290 aldo-keto reductase family 1, member C6                        |
|          |         |       |       |       |       |       |        |        | 0.5587 | 0.4548 | 0.3212 aldo-keto reductase family 1, member D1                        |

|         |         |       |       |       |       |       |        |        |        |        |                                                                               |
|---------|---------|-------|-------|-------|-------|-------|--------|--------|--------|--------|-------------------------------------------------------------------------------|
| 56043   | Akrt1e1 | -0.33 | -0.20 | -0.27 | -0.31 | -0.56 | 0.4272 | 0.6147 | 0.6303 | 0.0383 | 0.0004 aldo-keto reductase family 1, member E1                                |
| 56043   | Akrt1e1 | 0.06  | -0.06 | -0.06 | 0.05  | -0.03 | 0.5498 | 0.4581 | 0.5188 | 0.3587 | 0.3939 aldo-keto reductase family 1, member E1                                |
| 110198  | Akrt7a5 | -0.89 | 0.38  | 0.35  | -0.01 | -0.45 | 0.3368 | 0.2351 | 0.2207 | 0.5464 | 0.0452 aldo-keto reductase family 7, member A5 (alatoxin aldehyde reductase)  |
| 11674   | Adoa    | 0.34  | -0.11 | -0.39 | -0.01 | -0.44 | 0.2399 | 0.1406 | 0.1817 | 0.5603 | 0.3062 adolase 1, A. isofom                                                   |
| 11674   | Adoa    | -0.11 | -0.04 | -0.08 | 0.01  | 0.08  | 0.5908 | 0.5816 | 0.6021 | 0.5191 | 0.3802 adolase 1, A. isofom                                                   |
| 353204  | Adoat1  | -0.10 | 0.04  | -0.01 | -0.12 | -0.41 | 0.3336 | 0.4850 | 0.5668 | 0.0980 | 0.1634 adolase 1, A. isofom, retrogene 1                                      |
| 79459   | Adoat2  | -0.19 | 0.03  | 0.33  | -0.11 | -0.19 | 0.3424 | 0.6035 | 0.3199 | 0.3283 | 0.1313 adolase 1, A. isofom, retrogene 2                                      |
| Adoat12 | Adoat12 | -0.05 | 0.07  | 0.09  | 0.13  | -0.10 | 0.5317 | 0.4425 | 0.4032 | 0.0672 | 0.1223 adolase 1, A. isofom, retrogene 2                                      |
| 230163  | Adob    | 0.15  | -0.04 | -0.06 | 0.30  | 0.34  | 0.2784 | 0.5576 | 0.5233 | 0.1532 | 0.1209 adolase 2, B isofom                                                    |
| 230163  | Adob    | 0.16  | -0.01 | -0.09 | 0.78  | 0.77  | 0.5696 | 0.5995 | 0.6360 | 0.2668 | 0.1752 adolase 2, B isofom                                                    |
| 230163  | Adob    | 0.05  | 0.02  | -0.04 | 0.35  | 0.42  | 0.6033 | 0.6204 | 0.5737 | 0.2721 | 0.1421 adolase 2, B isofom                                                    |
| 11676   | Adoc    | -0.38 | -0.25 | -0.43 | -0.11 | -0.58 | 0.4732 | 0.5899 | 0.5998 | 0.3554 | 0.1563 adolase 3, C isofom                                                    |
| 11676   | Adoc    | -0.03 | 0.00  | -0.03 | -0.01 | -0.16 | 0.6396 | 0.6172 | 0.6253 | 0.5457 | 0.1367 alkaline phosphatase 3, intestine, not Mn requiring                    |
| 11648   | Akp3    | 0.06  | -0.07 | 0.00  | -0.03 | 0.03  | 0.5016 | 0.3290 | 0.5937 | 0.4528 | 0.0292 alkaline phosphatase 5                                                 |
| 11650   | Akp5    | 0.11  | -0.14 | -0.05 | -0.05 | -0.17 | 0.5404 | 0.2477 | 0.3549 | 0.4480 | 0.2798 alkaline phosphatase, intestinal                                       |
| 76768   | Alpl    | 0.14  | 0.02  | 0.11  | 0.03  | -0.09 | 0.4989 | 0.5403 | 0.6366 | 0.4892 | 0.2543 alkaline phosphatase, intestinal                                       |
| 76768   | Alpl    | -0.05 | 0.19  | 0.03  | 0.04  | -0.07 | 0.5337 | 0.1917 | 0.4765 | 0.4412 | 0.0000 alkaline phosphatase, liver/bone/kidney                                |
| 11647   | Alpl    | 0.24  | 0.61  | 1.61  | 1.27  | 1.85  | 0.3854 | 0.0344 | 0.0002 | 0.0006 | 0.0000 alkaline phosphatase, liver/bone/kidney                                |
| 211064  | Alkh1   | -0.24 | 0.61  | 0.80  | 0.62  | 0.69  | 0.4899 | 0.0383 | 0.0109 | 0.0004 | 0.0001 akkB, alkylaton repair homolog 1 (E. coli)                             |
| 211064  | Alkh1   | -0.05 | 0.01  | 0.01  | -0.05 | 0.01  | 0.5697 | 0.5866 | 0.5809 | 0.4222 | 0.4676 akkB, alkylaton repair homolog 1 (E. coli)                             |
| 231642  | Alkh2   | -0.19 | -0.04 | -0.51 | -0.34 | -0.76 | 0.5860 | 0.4487 | 0.5188 | 0.0077 | 0.0000 akkB, alkylaton repair homolog 2 (E. coli)                             |
| 69113   | Alkh3   | 0.27  | 0.06  | 0.49  | 0.65  | 0.70  | 0.3780 | 0.6230 | 0.0981 | 0.0176 | 0.0014 akkB, alkylaton repair homolog 3 (E. coli)                             |
| 69113   | Alkh3   | 0.24  | 0.09  | 0.31  | 0.24  | 0.45  | 0.2431 | 0.5921 | 0.4389 | 0.0266 | 0.0004 akkB, alkylaton repair homolog 3 (E. coli)                             |
| 72041   | Alkh4   | -0.23 | 0.01  | 0.25  | -0.03 | 0.16  | 0.5983 | 0.3016 | 0.4990 | 0.0490 | 0.1208 akkB, alkylaton repair homolog 4 (E. coli)                             |
| 72041   | Alkh4   | -0.25 | 0.09  | 0.35  | -0.23 | 0.21  | 0.2854 | 0.6113 | 0.1803 | 0.5057 | 0.0940 akkB, alkylaton repair homolog 4 (E. coli)                             |
| 72041   | Alkh4   | -0.23 | 0.09  | 0.26  | -0.02 | 0.21  | 0.2889 | 0.5978 | 0.3239 | 0.5217 | 0.0923 akkB, alkylaton repair homolog 4 (E. coli)                             |
| 72041   | Alkh4   | -0.20 | 0.18  | 0.37  | 0.02  | 0.20  | 0.3024 | 0.2948 | 0.1580 | 0.5009 | 0.1863 akkB, alkylaton repair homolog 4 (E. coli)                             |
| 72041   | Alkh4   | -0.70 | 0.09  | 0.23  | -0.06 | 0.06  | 0.3907 | 0.4323 | 0.4833 | 0.4633 | 0.3365 akkB, alkylaton repair homolog 4 (E. coli)                             |
| 72041   | Alkh4   | -0.15 | 0.08  | 0.37  | 0.02  | 0.20  | 0.4587 | 0.6131 | 0.2016 | 0.5309 | 0.1455 akkB, alkylaton repair homolog 4 (E. coli)                             |
| 72041   | Alkh4   | -0.15 | 0.16  | 0.30  | 0.01  | 0.30  | 0.4965 | 0.5806 | 0.3668 | 0.5488 | 0.0532 akkB, alkylaton repair homolog 4 (E. coli)                             |
| 72041   | Alkh4   | -0.11 | -0.05 | 0.22  | -0.12 | 0.04  | 0.5342 | 0.5286 | 0.3734 | 0.3267 | 0.3922 akkB, alkylaton repair homolog 4 (E. coli)                             |
| 72041   | Alkh4   | -0.15 | 0.33  | 0.44  | -0.04 | 0.40  | 0.5646 | 0.5072 | 0.3545 | 0.5108 | 0.0415 akkB, alkylaton repair homolog 4 (E. coli)                             |
| 72041   | Alkh4   | -0.05 | -0.04 | -0.05 | -0.04 | -0.05 | 0.6526 | 0.4480 | 0.6176 | 0.4588 | 0.0705 akkB, alkylaton repair homolog 5 (E. coli)                             |
| 268420  | Alkh5   | -0.15 | 0.25  | -0.02 | -0.15 | -0.42 | 0.6526 | 0.4480 | 0.6176 | 0.4588 | 0.3361 akkB, alkylaton repair homolog 5 (E. coli)                             |
| 233065  | Alkh6   | -0.10 | -0.16 | -0.46 | -0.26 | -0.32 | 0.6158 | 0.2700 | 0.0508 | 0.2120 | 0.0715 akkB, alkylaton repair homolog 6 (E. coli)                             |
| 66400   | Alkh7   | -0.74 | -0.26 | -1.18 | -0.71 | -1.39 | 0.4249 | 0.5300 | 0.3851 | 0.0057 | 0.0000 akkB, alkylaton repair homolog 7 (E. coli)                             |
| 66400   | Alkh7   | -0.06 | -0.25 | -0.65 | -0.57 | -0.64 | 0.6335 | 0.1541 | 0.0085 | 0.0034 | 0.0001 akkB, alkylaton repair homolog 7 (E. coli)                             |
| 67667   | Alkh8   | -0.09 | -0.01 | -0.04 | -0.09 | -0.09 | 0.5028 | 0.6286 | 0.5680 | 0.3284 | 0.2695 akkB, alkylaton repair homolog 8 (E. coli)                             |
| 67667   | Alkh8   | -0.04 | -0.17 | -0.04 | -0.03 | 0.24  | 0.6544 | 0.6289 | 0.5142 | 0.4901 | 0.0175 akkB, alkylaton repair homolog 8 (E. coli)                             |
| 228061  | Agps    | -0.28 | -0.11 | -0.10 | -0.39 | -0.71 | 0.2965 | 0.5022 | 0.3884 | 0.0117 | 0.0018 akkB, alkylaton repair homolog 8 (E. coli)                             |
| 228061  | Agps    | 0.02  | -0.51 | -0.23 | -0.07 | -0.15 | 0.6831 | 0.2682 | 0.5875 | 0.3875 | 0.0008 alkylglycerone phosphate synthase                                      |
| 94041   | Alic    | -0.11 | 0.08  | 0.09  | -0.01 | -0.13 | 0.4249 | 0.4062 | 0.2832 | 0.5431 | 0.1362 alkylglycerone phosphate synthase                                      |
| 11629   | Afl1    | 0.09  | 0.54  | -0.10 | -0.17 | -0.50 | 0.6128 | 0.5699 | 0.1983 | 0.0730 | 0.0936 allantoinase                                                           |
| 11629   | Afl1    | 0.09  | 0.54  | -0.10 | -0.17 | -0.50 | 0.6128 | 0.5699 | 0.1983 | 0.0730 | 0.0204 allograft inflammatory factor 1                                        |
| 11629   | Afl1    | 0.09  | 0.54  | -0.10 | -0.17 | -0.50 | 0.6128 | 0.5699 | 0.1983 | 0.0730 | 0.1802 alpha 1, microglobulin/bikunin                                         |
| 11576   | Afp     | -0.36 | 0.40  | -0.58 | 0.92  | 0.99  | 0.4888 | 0.5617 | 0.3596 | 0.3097 | 0.3427 alpha fetoprotein                                                      |
| 11576   | Afp     | -0.45 | 0.33  | 0.10  | 0.12  | 0.08  | 0.3282 | 0.0866 | 0.2717 | 0.3564 | 0.4047 alpha fetoprotein                                                      |
| 11576   | Afp     | -0.39 | 0.33  | 0.02  | 0.12  | 0.15  | 0.3969 | 0.1629 | 0.3924 | 0.3405 | 0.2159 alpha fetoprotein                                                      |
| 11576   | Afp     | -0.24 | 0.39  | 0.16  | 0.18  | 0.21  | 0.4078 | 0.0805 | 0.2549 | 0.2372 | 0.1295 alpha fetoprotein                                                      |
| 11576   | Afp     | -0.18 | 0.40  | -0.05 | 0.04  | 0.03  | 0.4211 | 0.1584 | 0.6386 | 0.4900 | 0.4442 alpha fetoprotein                                                      |
| 11576   | Afp     | -0.36 | 0.27  | -0.05 | 0.11  | 0.06  | 0.4247 | 0.2237 | 0.4583 | 0.3096 | 0.3694 alpha fetoprotein                                                      |
| 11576   | Afp     | 0.09  | 0.42  | 0.10  | 0.09  | 0.28  | 0.6295 | 0.3819 | 0.5664 | 0.4446 | 0.1229 alpha fetoprotein                                                      |
| 11576   | Afp     | 0.06  | 0.39  | 0.05  | 0.12  | 0.18  | 0.6554 | 0.4382 | 0.4819 | 0.3572 | 0.1873 alpha fetoprotein                                                      |
| 11576   | Afp     | 0.03  | 0.28  | 0.06  | 0.05  | 0.06  | 0.6723 | 0.4928 | 0.5567 | 0.4887 | 0.4111 alpha fetoprotein                                                      |
| 11576   | Afp     | 0.01  | 0.31  | 0.00  | 0.14  | 0.13  | 0.6956 | 0.2768 | 0.5227 | 0.2665 | 0.2351 alpha fetoprotein                                                      |
| 17168   | Mare    | -0.31 | 0.19  | 0.41  | 0.29  | 0.23  | 0.3462 | 0.2021 | 0.0413 | 0.0213 | 0.0332 alpha globin regulatory element containing gene                        |
| 17168   | Mare    | -0.06 | 0.08  | 0.00  | 0.09  | 0.00  | 0.6122 | 0.6221 | 0.5527 | 0.2675 | 0.4878 alpha globin regulatory element containing gene                        |
| 14376   | Ganab   | -0.21 | -0.01 | -0.07 | -0.13 | -0.15 | 0.4012 | 0.5820 | 0.0936 | 0.0936 | 0.0316 alpha glucosidase 2 alpha neutral subunit                              |
| 14376   | Ganab   | 0.12  | -0.17 | -0.09 | -0.14 | 0.18  | 0.4429 | 0.3715 | 0.4412 | 0.2945 | 0.0877 alpha glucosidase 2 alpha neutral subunit                              |
| 22589   | Atrx    | 0.48  | -0.25 | -0.22 | 0.54  | 0.84  | 0.1411 | 0.4593 | 0.5056 | 0.0053 | 0.0002 alpha thalassemia mental retardation syndrome X-linked homolog (human) |
| 22589   | Atrx    | 0.08  | -0.15 | -0.07 | 0.11  | 0.16  | 0.5541 | 0.5089 | 0.6428 | 0.2956 | 0.1284 alpha thalassemia mental retardation syndrome X-linked homolog (human) |
| 333424  | Agnt1   | -0.09 | -0.03 | 0.01  | -0.05 | -0.03 | 0.4428 | 0.6400 | 0.5695 | 0.3607 | 0.4056 alpha-1,4-N-acetylglucosaminyltransferase                              |
| 117586  | Albg    | 0.00  | 0.02  | 0.06  | 0.04  | 0.00  | 0.7034 | 0.6028 | 0.4892 | 0.3873 | 0.4936 alpha-1-B glycoprotein                                                 |
| 12007   | Azgp1   | -0.26 | -0.61 | -0.77 | -0.03 | -0.24 | 0.5434 | 0.4170 | 0.2765 | 0.5378 | 0.2419 alpha-2-glycoprotein 1, zinc                                           |

|        |         |       |       |       |       |       |        |        |        |        |        |                                                            |
|--------|---------|-------|-------|-------|-------|-------|--------|--------|--------|--------|--------|------------------------------------------------------------|
| 11418  | Acn1    | 0.14  | -0.10 | 0.06  | -0.02 | 0.07  | 0.3153 | 0.3674 | 0.4835 | 0.4797 | 0.2509 | amiloride-sensitive cation channel 1, neuronal (degenerin) |
| 11419  | Acn1    | 0.08  | -0.03 | -0.06 | 0.04  | 0.03  | 0.5011 | 0.5467 | 0.4429 | 0.4424 | 0.4163 | amiloride-sensitive cation channel 1, neuronal (degenerin) |
| 11419  | Acn2    | 0.07  | 0.02  | 0.06  | 0.08  | 0.02  | 0.5892 | 0.5075 | 0.5879 | 0.3321 | 0.4163 | amiloride-sensitive cation channel 2, neuronal             |
| 11419  | Acn2    | 0.08  | 0.04  | 0.13  | 0.02  | -0.02 | 0.6034 | 0.5016 | 0.6189 | 0.5059 | 0.4476 | amiloride-sensitive cation channel 2, neuronal             |
| 171209 | Acn3    | 0.02  | 0.06  | -0.03 | 0.18  | 0.30  | 0.6696 | 0.3474 | 0.6158 | 0.9604 | 0.0029 | amiloride-sensitive cation channel 3                       |
| 241118 | Acn4    | 0.07  | -0.02 | -0.01 | 0.05  | 0.07  | 0.5342 | 0.4794 | 0.5065 | 0.4377 | 0.2663 | amiloride-sensitive cation channel 4, pituitary            |
| 58170  | Acn5    | -0.01 | 0.06  | 0.02  | -0.03 | -0.05 | 0.6797 | 0.4783 | 0.6238 | 0.4499 | 0.3044 | amiloride-sensitive cation channel 5, intestinal           |
| 99882  | Ac2     | 0.16  | -0.06 | 0.11  | 0.04  | 0.18  | 0.5413 | 0.3875 | 0.5746 | 0.4765 | 0.1581 | amine oxidase (flavin containing) domain 2                 |
| 237940 | Ac2     | 0.15  | 0.32  | 0.61  | 0.44  | 0.79  | 0.4618 | 0.2325 | 0.0144 | 0.0100 | 0.0001 | amine oxidase, copper containing 2 (retina-specific)       |
| 11754  | Ac3     | 0.61  | -0.70 | -0.18 | 0.09  | -0.17 | 0.3176 | 0.1189 | 0.5843 | 0.5065 | 0.3492 | amine oxidase, copper containing 3                         |
| 218214 | Ac3     | -0.10 | -0.87 | -0.73 | -0.67 | -0.68 | 0.4884 | 0.0025 | 0.0028 | 0.0001 | 0.0003 | amine oxidase, copper containing 3                         |
| 266645 | Ac3     | -0.03 | 0.11  | -0.02 | -0.02 | 0.03  | 0.4884 | 0.0025 | 0.0028 | 0.0001 | 0.0003 | amine oxidase, copper containing 3                         |
| 109652 | Ac1     | 0.00  | -0.08 | -0.05 | -0.04 | -0.14 | 0.6951 | 0.2984 | 0.5813 | 0.4534 | 0.3786 | amino carboxymuconate semialdehyde decarboxylase           |
| 23923  | Aad1    | 0.02  | -0.09 | -0.06 | 0.02  | -0.12 | 0.6542 | 0.4299 | 0.4995 | 0.5319 | 0.0594 | aminoacylase 1                                             |
| 231326 | Aasdh   | -0.34 | -0.31 | -0.94 | -0.97 | -1.32 | 0.2321 | 0.1571 | 0.0010 | 0.0008 | 0.1775 | aminoacylase 1                                             |
| 231326 | Aasdh   | -0.15 | 0.15  | 0.04  | -0.06 | -0.08 | 0.2776 | 0.1816 | 0.4869 | 0.3100 | 0.0000 | aminoacylase 1                                             |
| 231326 | Aasdh   | -0.01 | 0.06  | -0.02 | -0.10 | -0.10 | 0.6689 | 0.4066 | 0.5586 | 0.5576 | 0.0000 | aminoacylase 1                                             |
| 67618  | Aasdhpt | 0.47  | -0.70 | -0.93 | -0.53 | -0.72 | 0.1253 | 0.0065 | 0.0012 | 0.0030 | 0.0003 | aminoacylase 1                                             |
| 67618  | Aasdhpt | 0.37  | 0.25  | 0.07  | -0.08 | -0.11 | 0.4603 | 0.2569 | 0.3643 | 0.4543 | 0.0003 | aminoacylase 1                                             |
| 76718  | Aasdhpt | -0.16 | -0.21 | -0.66 | -0.53 | -0.61 | 0.5044 | 0.2550 | 0.0125 | 0.0015 | 0.0003 | aminoacylase 1                                             |
| 30956  | Aas     | -0.86 | 0.33  | -0.41 | -0.36 | -0.59 | 0.0310 | 0.3276 | 0.0431 | 0.1106 | 0.0028 | aminoacylase 1                                             |
| 17025  | Alad    | -1.94 | -0.23 | -0.17 | -0.25 | -0.51 | 0.1585 | 0.4963 | 0.4521 | 0.0563 | 0.0008 | aminoacylase 1                                             |
| 11655  | Alas1   | 0.27  | -0.68 | -1.31 | -0.44 | -1.18 | 0.4392 | 0.0441 | 0.0034 | 0.0234 | 0.0136 | aminoacylase 1                                             |
| 11655  | Alas1   | -0.07 | -0.60 | -0.71 | -0.71 | -1.61 | 0.6489 | 0.0619 | 0.0021 | 0.0026 | 0.0001 | aminoacylase 1                                             |
| 11656  | Alas2   | -0.20 | 0.15  | 0.60  | -0.18 | -0.04 | 0.6513 | 0.3986 | 0.2309 | 0.0021 | 0.0001 | aminoacylase 1                                             |
| 19155  | Niepps  | -0.11 | 0.25  | 0.33  | -0.32 | -0.21 | 0.6043 | 0.4988 | 0.4133 | 0.0837 | 0.4728 | aminoacylase 1                                             |
| 19155  | Niepps  | 0.06  | 0.15  | 0.02  | -0.29 | -0.24 | 0.6542 | 0.5947 | 0.5231 | 0.0817 | 0.1606 | aminoacylase 1                                             |
| 228961 | Niept1  | 0.03  | 0.15  | 0.02  | 0.14  | 0.04  | 0.6766 | 0.6262 | 0.5252 | 0.3147 | 0.1354 | aminoacylase 1                                             |
| 14797  | Aes     | 0.54  | -0.35 | 0.05  | 0.51  | 0.61  | 0.2488 | 0.1824 | 0.5770 | 0.1181 | 0.4314 | aminoacylase 1                                             |
| 225339 | Amncr11 | 0.52  | -0.72 | -0.10 | 0.30  | 0.45  | 0.2328 | 0.0298 | 0.4183 | 0.1699 | 0.0200 | aminoacylase 1                                             |
| 225339 | Amncr11 | -0.13 | -0.23 | -0.23 | -0.09 | -0.17 | 0.4029 | 0.3850 | 0.1404 | 0.1470 | 0.0104 | aminoacylase 1                                             |
| 225339 | Amncr11 | -0.08 | 0.03  | -0.01 | -0.02 | -0.04 | 0.4860 | 0.6285 | 0.5540 | 0.4996 | 0.2114 | aminoacylase 1                                             |
| 225339 | Amncr11 | -0.03 | 0.15  | 0.24  | -0.05 | 0.13  | 0.3982 | 0.6536 | 0.3982 | 0.1729 | 0.3530 | aminoacylase 1                                             |
| 93835  | Ann     | 0.07  | 0.39  | 0.11  | 0.20  | 0.17  | 0.4927 | 0.0719 | 0.3470 | 0.0247 | 0.1485 | aminoacylase 1                                             |
| 11717  | Ampd3   | 0.08  | 0.04  | 0.54  | 0.94  | 1.24  | 0.6337 | 0.4719 | 0.1629 | 0.0028 | 0.0180 | aminoacylase 1                                             |
| 218038 | Amph    | 0.03  | -0.06 | 0.02  | -0.03 | 0.05  | 0.6337 | 0.4719 | 0.6095 | 0.4628 | 0.0001 | aminoacylase 1                                             |
| 218038 | Amph    | 0.65  | 0.01  | -0.23 | 0.51  | 0.22  | 0.0565 | 0.6411 | 0.3109 | 0.0108 | 0.3161 | aminoacylase 1                                             |
| 11839  | Areg    | 0.13  | 0.99  | 0.93  | -0.09 | -0.09 | 0.5480 | 0.1783 | 0.0767 | 0.1917 | 0.1169 | aminoacylase 1                                             |
| 216440 | Os9     | 0.10  | 0.54  | 0.65  | 0.49  | 0.41  | 0.6521 | 0.1914 | 0.1453 | 0.5190 | 0.3192 | aminoacylase 1                                             |
| 216440 | Os9     | -0.01 | 0.16  | 0.14  | 0.13  | 0.18  | 0.6040 | 0.1545 | 0.0590 | 0.0073 | 0.2302 | aminoacylase 1                                             |
| 216440 | Os9     | 0.02  | 0.69  | 0.47  | -0.06 | 0.25  | 0.6806 | 0.2809 | 0.2731 | 0.0678 | 0.0038 | aminoacylase 1                                             |
| 11722  | Amv1    | 0.12  | -0.41 | -0.18 | 0.42  | 0.19  | 0.6853 | 0.2245 | 0.3847 | 0.4482 | 0.0325 | aminoacylase 1                                             |
| 11722  | Amv1    | -0.01 | -0.20 | -0.19 | 0.50  | 0.10  | 0.5197 | 0.5042 | 0.1940 | 0.5042 | 0.0331 | aminoacylase 1                                             |
| 11723  | Amv2    | 0.29  | -0.05 | -0.18 | 0.25  | 0.17  | 0.1989 | 0.6446 | 0.4521 | 0.0473 | 0.2722 | aminoacylase 1                                             |
| 77559  | Ag1     | -0.15 | -0.37 | -0.50 | -0.12 | -0.36 | 0.5238 | 0.0601 | 0.0705 | 0.4029 | 0.4050 | aminoacylase 1                                             |
| 11820  | App     | 0.55  | -0.22 | 0.07  | 0.37  | 0.77  | 0.1264 | 0.4729 | 0.6158 | 0.0982 | 0.0720 | aminoacylase 1                                             |
| 11820  | App     | 0.75  | -0.21 | 0.16  | 0.36  | 1.11  | 0.1302 | 0.4338 | 0.6138 | 0.0982 | 0.0021 | aminoacylase 1                                             |
| 11820  | App     | 0.47  | -0.16 | 0.23  | 0.28  | 0.81  | 0.1795 | 0.4850 | 0.4969 | 0.2291 | 0.0000 | aminoacylase 1                                             |
| 11820  | App     | 0.54  | -0.26 | 0.09  | 0.24  | 0.82  | 0.2102 | 0.5542 | 0.4672 | 0.1678 | 0.0018 | aminoacylase 1                                             |
| 11820  | App     | 0.92  | -0.07 | 0.29  | 0.34  | 0.92  | 0.2190 | 0.5247 | 0.5698 | 0.1376 | 0.0015 | aminoacylase 1                                             |
| 11820  | App     | -0.53 | -0.19 | -0.25 | 0.35  | 0.42  | 0.2881 | 0.5553 | 0.4622 | 0.1616 | 0.0029 | aminoacylase 1                                             |
| 11820  | App     | 0.49  | -0.49 | -0.36 | 0.42  | 0.90  | 0.5082 | 0.5182 | 0.4432 | 0.1280 | 0.0002 | aminoacylase 1                                             |
| 11820  | App     | 0.08  | 0.21  | 0.39  | 0.11  | 0.42  | 0.4820 | 0.5082 | 0.0904 | 0.2985 | 0.0006 | aminoacylase 1                                             |
| 11820  | App     | -0.41 | -0.11 | 0.30  | 0.39  | 0.77  | 0.5987 | 0.4573 | 0.2980 | 0.1107 | 0.0033 | aminoacylase 1                                             |
| 11820  | App     | -0.32 | -0.13 | 0.31  | 0.37  | 0.73  | 0.6025 | 0.4678 | 0.2847 | 0.1226 | 0.0050 | aminoacylase 1                                             |
| 11820  | App     | -0.22 | -0.16 | 0.30  | 0.37  | 0.80  | 0.6367 | 0.4907 | 0.2860 | 0.1414 | 0.0062 | aminoacylase 1                                             |
| 11820  | App     | -0.02 | 0.33  | 0.21  | -0.07 | 0.22  | 0.6831 | 0.4495 | 0.5875 | 0.4522 | 0.0029 | aminoacylase 1                                             |
| 319924 | Abp1    | 0.14  | -0.06 | -0.07 | -0.01 | 0.04  | 0.3444 | 0.3186 | 0.2586 | 0.5333 | 0.3502 | aminoacylase 1                                             |
| 319924 | Abp1    | -0.09 | 0.11  | 0.07  | -0.08 | 0.05  | 0.5486 | 0.5727 | 0.6404 | 0.3332 | 0.3502 | aminoacylase 1                                             |
| 11784  | Abp2    | 0.03  | 0.21  | -0.03 | 0.02  | 0.02  | 0.6515 | 0.1763 | 0.4133 | 0.5248 | 0.4428 | aminoacylase 1                                             |
| 57267  | Abp3    | -0.77 | -0.02 | 0.03  | -0.13 | -0.38 | 0.3569 | 0.4217 | 0.3775 | 0.1905 | 0.0035 | aminoacylase 1                                             |
| 11785  | Abp1    | 0.38  | -0.08 | 0.32  | 0.55  | 0.92  | 0.2784 | 0.3689 | 0.4972 | 0.0312 | 0.0001 | aminoacylase 1                                             |
| 54519  | Abp1p   | -0.78 | 0.61  | -0.19 | -1.28 | -1.51 | 0.5491 | 0.5062 | 0.4757 | 0.3175 | 0.3043 | aminoacylase 1                                             |
| 54519  | Abp1p   | -0.07 | 0.03  | 0.03  | -0.07 | -0.05 | 0.5825 | 0.0051 | 0.0034 | 0.0254 | 0.0005 | aminoacylase                                               |

|        |         |       |       |       |       |       |        |        |        |        |                                                                   |
|--------|---------|-------|-------|-------|-------|-------|--------|--------|--------|--------|-------------------------------------------------------------------|
| 74018  | Als2    | 0.14  | -0.02 | 0.03  | 0.19  | 0.18  | 0.3062 | 0.6230 | 0.5491 | 0.0247 | 0.0292 amyotrophic lateral sclerosis 2 (juvenile) homolog (human) |
| 74018  | Als2    | 0.06  | -0.09 | 0.00  | 0.10  | 0.24  | 0.5475 | 0.5363 | 0.5566 | 0.1757 | 0.0093 amyotrophic lateral sclerosis 2 (juvenile) homolog (human) |
| 67492  | AnuB1   | 0.07  | 0.03  | -0.06 | -0.01 | 0.08  | 0.4389 | 0.6286 | 0.3534 | 0.5190 | 0.1889 AN1, ubiquitin-like, homolog (Xenopus laevis)              |
| 67492  | AnuB1   | -0.09 | 0.03  | -0.26 | 0.03  | 0.08  | 0.6093 | 0.4938 | 0.3937 | 0.5296 | 0.3948 AN1, ubiquitin-like, homolog (Xenopus laevis)              |
| 17222  | Anapc1  | 0.37  | -0.57 | -0.49 | -0.29 | -0.40 | 0.3153 | 0.0460 | 0.0414 | 0.0599 | 0.0105 anaphase promoting complex subunit 1                       |
| 17222  | Anapc1  | 0.37  | 1.21  | 1.42  | 0.87  | 1.69  | 0.4374 | 0.0695 | 0.0179 | 0.0001 | 0.0000 anaphase promoting complex subunit 1                       |
| 17222  | Anapc1  | 0.06  | 0.02  | 0.01  | 0.02  | 0.11  | 0.4969 | 0.5833 | 0.5132 | 0.3719 | 0.1218 anaphase promoting complex subunit 1                       |
| 17222  | Anapc1  | -0.15 | -0.21 | 0.11  | 0.20  | 0.45  | 0.5639 | 0.5961 | 0.2914 | 0.2527 | 0.0168 anaphase promoting complex subunit 1                       |
| 17222  | Anapc1  | 0.09  | -0.62 | -0.51 | 0.11  | -0.21 | 0.6592 | 0.4693 | 0.5232 | 0.4415 | 0.2472 anaphase promoting complex subunit 1                       |
| 17222  | Anapc1  | 0.28  | -0.49 | -0.45 | -0.13 | 0.14  | 0.3411 | 0.1096 | 0.2135 | 0.2853 | 0.1903 anaphase promoting complex subunit 10                      |
| 68999  | Anapc10 | 0.04  | -0.08 | -0.09 | -0.05 | -0.05 | 0.6080 | 0.4960 | 0.4108 | 0.4008 | 0.3427 anaphase promoting complex subunit 11 homolog (yeast)      |
| 66156  | Anapc11 | 0.16  | -0.59 | -0.83 | -0.57 | -0.88 | 0.3843 | 0.0096 | 0.0004 | 0.0054 | 0.0000 anaphase promoting complex subunit 11 homolog (yeast)      |
| 66156  | Anapc11 | 0.26  | -0.46 | -0.42 | -0.25 | -0.41 | 0.5116 | 0.1219 | 0.0824 | 0.3193 | 0.0984 anaphase promoting complex subunit 11 homolog (yeast)      |
| 66156  | Anapc11 | 0.01  | 0.10  | 0.06  | 0.21  | 0.33  | 0.6863 | 0.2089 | 0.4188 | 0.1759 | 0.0518 anaphase promoting complex subunit 11 homolog (yeast)      |
| 69010  | Anapc13 | -0.46 | -0.43 | -0.54 | -0.50 | -0.89 | 0.3795 | 0.5388 | 0.4158 | 0.0114 | 0.0004 anaphase promoting complex subunit 13                      |
| 99152  | Anapc2  | -0.37 | -0.22 | 0.26  | 0.60  | 0.72  | 0.5245 | 0.5798 | 0.3262 | 0.0326 | 0.0058 anaphase promoting complex subunit 2                       |
| 99152  | Anapc2  | -0.04 | -0.15 | -0.37 | -0.36 | -0.57 | 0.6396 | 0.3697 | 0.0153 | 0.0129 | 0.0001 anaphase promoting complex subunit 2                       |
| 99152  | Anapc2  | -0.02 | -0.48 | -0.18 | 0.15  | 0.21  | 0.6857 | 0.3446 | 0.6046 | 0.2672 | 0.1530 anaphase promoting complex subunit 2                       |
| 52206  | Anap4   | 0.18  | -0.39 | -0.35 | -0.11 | -0.13 | 0.3465 | 0.0490 | 0.0324 | 0.2872 | 0.1677 anaphase promoting complex subunit 4                       |
| 52206  | Anap4   | 0.36  | -0.66 | -0.89 | -0.53 | -0.45 | 0.3830 | 0.0462 | 0.0104 | 0.0015 | 0.0014 anaphase promoting complex subunit 4                       |
| 56317  | Anapc7  | -0.41 | 0.12  | 0.22  | -0.17 | -0.20 | 0.3323 | 0.6166 | 0.5939 | 0.3119 | 0.2164 anaphase promoting complex subunit 7                       |
| 56317  | Anapc7  | 0.01  | 0.12  | 0.22  | 0.11  | 0.14  | 0.6801 | 0.2136 | 0.1840 | 0.5474 | 0.0399 anaphase promoting complex subunit 7                       |
| 59008  | Anapc5  | -0.43 | -0.34 | 0.09  | 0.11  | -0.11 | 0.3094 | 0.4613 | 0.4082 | 0.3599 | 0.3317 anaphase-promoting complex subunit 5                       |
| 59008  | Anapc5  | 0.01  | -0.57 | -0.60 | -0.12 | -0.30 | 0.6914 | 0.0968 | 0.0406 | 0.3782 | 0.0507 anaphase-promoting complex subunit 5                       |
| 11682  | Alk     | -0.13 | 0.03  | 0.08  | -0.09 | -0.06 | 0.2676 | 0.5313 | 0.5033 | 0.1885 | 0.2177 anaplastic lymphoma kinase                                 |
| 11682  | Alk     | -0.08 | 0.07  | 0.08  | -0.06 | -0.06 | 0.5002 | 0.5081 | 0.4137 | 0.3673 | 0.3363 anaplastic lymphoma kinase                                 |
| 11993  | Ap1     | -0.29 | -0.41 | 0.05  | 0.31  | 0.30  | 0.5541 | 0.6388 | 0.3835 | 0.2273 | 0.1729 ancient ubiquitous protein                                 |
| 11354  | Ap3a    | 0.07  | -0.06 | 0.02  | 0.06  | -0.01 | 0.4826 | 0.4678 | 0.5628 | 0.3562 | 0.4622 androgen binding protein alpha                             |
| 233099 | Ap3b    | 0.06  | -0.02 | -0.02 | 0.00  | 0.08  | 0.5432 | 0.5990 | 0.5836 | 0.5628 | 0.2452 androgen binding protein beta                              |
| 233099 | Ap3b    | 0.02  | -0.05 | -0.03 | 0.02  | 0.02  | 0.6681 | 0.6147 | 0.6313 | 0.5218 | 0.4424 androgen binding protein beta                              |
| 494519 | Ap3d    | -0.01 | -0.02 | 0.02  | -0.02 | -0.13 | 0.6834 | 0.4528 | 0.5273 | 0.4973 | 0.0358 androgen binding protein delta                             |
| 381970 | Ap3e    | 0.05  | -0.62 | 0.01  | 0.02  | 0.02  | 0.5870 | 0.3959 | 0.5196 | 0.5195 | 0.4408 androgen binding protein epsilon                           |
| 110187 | Ap3g    | 0.02  | 0.09  | 0.05  | 0.03  | 0.06  | 0.6431 | 0.4226 | 0.5118 | 0.4518 | 0.2961 androgen binding protein epsilon                           |
| 233090 | Ap3z    | 0.10  | 0.02  | 0.09  | -0.06 | 0.00  | 0.5375 | 0.4785 | 0.5865 | 0.2905 | 0.4902 androgen binding protein gamma                             |
| 11835  | Ar      | 0.16  | -0.22 | -0.14 | -0.02 | -0.04 | 0.3072 | 0.1038 | 0.4301 | 0.5122 | 0.3847 androgen receptor                                          |
| 11835  | Ar      | 0.14  | -0.30 | -0.18 | -0.02 | -0.02 | 0.4377 | 0.1905 | 0.3943 | 0.4970 | 0.4598 androgen receptor                                          |
| 11835  | Ar      | -0.12 | -0.11 | -0.16 | -0.01 | -0.05 | 0.5196 | 0.6426 | 0.5885 | 0.5344 | 0.3314 androgen receptor                                          |
| 11835  | Ar      | 0.06  | -0.17 | -0.20 | -0.05 | 0.00  | 0.5908 | 0.3024 | 0.2097 | 0.4754 | 0.4855 androgen receptor                                          |
| 11835  | Ar      | 0.04  | -0.13 | -0.15 | -0.09 | -0.10 | 0.6132 | 0.4009 | 0.3726 | 0.2440 | 0.1580 androgen receptor                                          |
| 11835  | Ar      | -0.04 | -0.06 | -0.07 | -0.07 | -0.07 | 0.6488 | 0.5599 | 0.5099 | 0.4343 | 0.3473 androgen receptor                                          |
| 11835  | Ar      | -0.03 | -0.03 | -0.14 | 0.01  | -0.01 | 0.6736 | 0.5073 | 0.5963 | 0.5376 | 0.4840 androgen receptor                                          |
| 11835  | Ar      | -0.01 | -0.05 | -0.16 | -0.08 | -0.13 | 0.6764 | 0.5519 | 0.3061 | 0.2540 | 0.1035 androgen receptor                                          |
| 11835  | Ar      | 0.03  | -0.07 | -0.03 | -0.02 | -0.05 | 0.6859 | 0.6398 | 0.3716 | 0.5320 | 0.3677 androgen receptor                                          |
| 11835  | Ar      | -0.01 | -0.13 | -0.19 | -0.12 | -0.20 | 0.6888 | 0.2199 | 0.1153 | 0.2897 | 0.0904 androgen receptor                                          |
| 57426  | Ap3h    | 0.12  | -0.03 | 0.04  | 0.09  | 0.08  | 0.5116 | 0.6232 | 0.5788 | 0.3784 | 0.3370 androgen-binding protein eta                               |
| 66253  | Ag1     | 0.22  | 0.04  | 0.22  | 0.04  | 0.40  | 0.0948 | 0.5887 | 0.5493 | 0.4894 | 0.0025 androgen-induced 1                                         |
| 66253  | Ag1     | -0.51 | 0.01  | -0.29 | -0.02 | -0.03 | 0.2788 | 0.4321 | 0.5879 | 0.5293 | 0.4403 androgen-induced 1                                         |
| 68737  | Angel1  | -0.12 | 0.25  | -0.16 | -0.35 | -0.63 | 0.6001 | 0.6335 | 0.2728 | 0.0183 | 0.0012 angel homolog 1 (Drosophila)                               |
| 52477  | Angel2  | -0.71 | -0.14 | -0.21 | -0.32 | -0.48 | 0.3360 | 0.6052 | 0.5313 | 0.0700 | 0.0065 angel homolog 2 (Drosophila)                               |
| 52477  | Angel2  | 0.11  | -0.32 | -0.21 | -0.10 | -0.06 | 0.3793 | 0.0812 | 0.1262 | 0.1917 | 0.2872 angel homolog 2 (Drosophila)                               |
| 52477  | Angel2  | -0.22 | -0.42 | -0.48 | -0.73 | -0.82 | 0.3801 | 0.1423 | 0.0214 | 0.0011 | 0.0001 angel homolog 2 (Drosophila)                               |
| 52477  | Angel2  | 0.22  | -0.62 | -0.72 | -0.56 | -0.69 | 0.4860 | 0.0336 | 0.0104 | 0.0064 | 0.0007 angel homolog 2 (Drosophila)                               |
| 227290 | Aamp    | -0.66 | 0.44  | 0.44  | 0.25  | -0.05 | 0.3958 | 0.1922 | 0.1754 | 0.0658 | 0.3829 angio-associated migratory protein                         |
| 227290 | Aamp    | 0.12  | 0.32  | -0.07 | -0.10 | -0.47 | 0.6219 | 0.5287 | 0.3926 | 0.4575 | 0.0349 angio-associated migratory protein                         |
| 66549  | Agf1    | 0.00  | -0.21 | 0.02  | 0.23  | 0.55  | 0.7028 | 0.6126 | 0.4172 | 0.0455 | 0.0017 angiotensin converting enzyme (peptidyl-dipeptidase A) 1   |
| 11731  | Ang2    | 0.10  | -0.21 | 0.13  | -0.19 | -0.31 | 0.5843 | 0.2924 | 0.3701 | 0.2428 | 0.0522 angiotensin, ribonuclease A family, member 2               |
| 219033 | Ang4    | 0.34  | -0.53 | -0.46 | -0.31 | -0.38 | 0.0151 | 0.0151 | 0.1592 | 0.1592 | 0.0142 angiotensin, ribonuclease A family, member 4               |
| 219033 | Ang4    | 0.03  | -0.45 | -0.33 | -0.30 | -0.52 | 0.6766 | 0.0498 | 0.1687 | 0.0374 | 0.0025 angiotensin, ribonuclease A family, member 4               |
| 11727  | Ang     | -0.37 | -0.37 | -0.25 | -0.25 | -0.47 | 0.5330 | 0.6120 | 0.5392 | 0.0409 | 0.0092 angiotensin, ribonuclease A family, member 5               |
| 27494  | Anot    | 0.05  | -0.64 | -0.33 | 0.02  | 0.11  | 0.6467 | 0.0110 | 0.0647 | 0.5396 | 0.3380 angiotensin                                                |
| 27494  | Anot    | 0.00  | -0.01 | -0.11 | -0.03 | -0.01 | 0.7006 | 0.6466 | 0.1884 | 0.5056 | 0.4721 angiotensin                                                |
| 27494  | Anot    | 0.00  | 0.00  | 0.03  | 0.01  | 0.00  | 0.7020 | 0.5968 | 0.6011 | 0.5552 | 0.4552 angiotensin                                                |
| 56332  | Amot12  | 0.54  | -0.31 | 0.62  | 0.73  | 0.94  | 0.1484 | 0.3087 | 0.1137 | 0.0030 | 0.0002 angiotensin like 2                                         |
| 75723  | Amot11  | -0.14 | 0.02  | 0.00  | 0.06  | 0.28  | 0.5764 | 0.4737 | 0.5184 | 0.4773 | 0.1110 angiotensin-like 1                                         |
| 75723  | Amot11  | -0.01 | 0.20  | -0.02 | -0.24 | -0.16 | 0.6866 | 0.5251 | 0.4383 | 0.0859 | 0.1001 angiotensin-like 1                                         |
| 11600  | Angp11  | 0.19  | 0.03  | 0.01  | -0.17 | 0.01  | 0.3505 | 0.5410 | 0.5132 | 0.0912 | 0.4753 angiotensin-like 1                                         |
| 11600  | Angp11  | 0.21  | -0.06 | -0.10 | -0.13 | 0.08  | 0.4410 | 0.3588 | 0.2609 | 0.1685 | 0.2650 angiotensin-like 1                                         |
| 11601  | Angp12  | 0.75  | -0.26 | -0.41 | -0.12 | -0.06 | 0.0812 | 0.1949 | 0.0577 | 0.3699 | 0.4079 angiotensin-like 1                                         |
| 11602  | Angp14  | -0.06 | -0.06 | -0.06 | -0.02 | -0.08 | 0.5521 | 0.3654 | 0.3161 | 0.5210 | 0.2654 angiotensin-like 1                                         |
| 72713  | Angp11  | -0.05 | -0.13 | -0.05 | -0.07 | -0.09 | 0.5423 | 0.2877 | 0.3662 | 0.3968 | 0.3797 angiotensin-like 1                                         |
| 72713  | Angp11  | -0.07 | -0.07 | -0.03 | -0.05 | -0.03 | 0.5423 | 0.2877 | 0.3662 | 0.3968 | 0.3797 angiotensin-like 1                                         |
| 26360  | Angp12  | 0.36  | -0.18 | 0.42  | 0.65  | 0.80  | 0.2427 | 0.4939 | 0.1994 | 0.0219 | 0.0004 angiotensin-like 2                                         |
| 26360  | Angp12  | 0.39  | -0.38 | 0.19  | 0.29  | 0.29  | 0.1864 | 0.5212 | 0.2021 | 0.0438 | 0.0438 angiotensin-like 2                                         |
| 26360  | Angp12  | -0.15 | -0.04 | 0.07  | -0.16 | -0.16 | 0.3485 | 0.6108 | 0.3829 | 0.0935 | 0.1579 angiotensin-like 2                                         |
| 30924  | Angp13  | 0.31  | -0.08 | 0.00  | 0.11  | 0.19  | 0.3338 | 0.2976 | 0.4274 | 0.3418 | 0.0966 angiotensin-like 3                                         |
| 30924  | Angp13  | 0.09  | -0.03 | -0.06 | 0.17  | 0.30  | 0.5063 | 0.6451 | 0.5537 | 0.3148 | 0.0001 angiotensin-like 3                                         |
| 757875 | Angp14  | 0.56  | 1.38  | 1.65  | 2.00  | 2.02  | 0.4249 | 0.0448 | 0.0165 | 0.0010 | 0.0064 angiotensin-like 6                                         |
| 70726  | Angp16  | 0.22  | -0.01 | -0.38 | -0.26 | -0.46 | 0.4467 | 0.4289 | 0.0378 | 0.1053 | 0.0001 angiotensin-like 6                                         |
| 70726  | Angp16  | 0.12  | -0.12 | -0.64 | -0.62 | -0.95 | 0.5813 | 0.3893 | 0.0248 | 0.0046 | 0.0001 angiotensin-like 6                                         |
| 654812 | Angp17  | -0.29 | -0.30 | -0.23 | -0.52 | -0.48 | 0.3444 | 0.1109 | 0.2412 | 0.0200 | 0.0168 angiotensin-like 7                                         |
| 11421  | Ace     | 0.34  | -0.15 | 0.23  | 0.25  | 0.36  | 0.2982 | 0.3243 | 0.4488 | 0.2364 | 0.0405 angiotensin I converting enzyme (peptidyl-dipeptidase A) 1 |
| 11421  | Ace     | 0.53  | -0.61 | 0.24  | 0.71  | 1.16  | 0.3308 | 0.1540 | 0.5498 | 0.1029 | 0.0028 angiotensin I converting enzyme (peptidyl-dipeptidase A) 1 |
| 70008  | Ace2    | 0.18  | -0.10 | -0.09 | -0.12 | -0.17 | 0.5848 | 0.3901 | 0.4745 | 0.3964 | 0.2474 angiotensin I converting enzyme (peptidyl-dipeptidase A) 2 |
| 217246 | Ace3    | 0.18  | -0.51 | -0.78 | -0.14 | -0.41 | 0.4822 | 0.0322 | 0.0049 | 0.2392 | 0.0122 angiotensin I converting enzyme (peptidyl-dipeptidase A) 2 |
| 11607  | Agf1a   | -0.18 | 0.12  | 0.05  | 0.12  | 0.10  | 0.2613 | 0.5069 | 0.2139 | 0.3950 | 0.2371 angiotensin I converting enzyme (peptidyl-dipeptidase A) 3 |
| 11607  | Agf1a   | 0.52  | -0.54 | 0.13  | 0.43  | 0.90  | 0.1358 | 0.0625 | 0.6258 | 0.0262 | 0.0000 angiotensin II receptor, type 1a                           |
| 11607  | Agf1a   | 0.42  | -0.27 | 0.37  | 0.68  | 0.86  | 0.2214 | 0.2274 | 0.2540 | 0.0157 | 0.0005 angiotensin II receptor, type 1a                           |
| 11609  | Agf1b   | 0.12  | -0.06 | -0.06 | 0.02  | 0.04  | 0.5446 | 0.3332 | 0.3997 | 0.5403 | 0.4276 angiotensin II receptor, type 1b                           |
| 11609  | Agf1b   | 0.06  | -0.04 | 0.05  | -0.04 | -0.04 | 0.5563 | 0.3680 | 0.6239 | 0.3953 | 0.2915 angiotensin II receptor, type 2                            |
| 11610  | Agf1a   | 0.18  | -0.11 | -0.13 | 0.00  | -0.10 | 0.4178 | 0.2431 | 0.2148 | 0.5603 | 0.2054 angiotensin II, type I receptor-associated protein         |
| 11610  | Agf1a   | -0.10 | 0.08  | -0.06 | -0.22 | -0.53 | 0.5196 | 0.5614 | 0.5132 | 0.0692 | 0.0021 angiotensin II, type I receptor-associated protein         |
| 11610  | Agf1a   | 0.03  | -0.19 | -0.10 | -0.57 | -0.67 | 0.6801 | 0.2459 | 0.4378 | 0.0184 | 0.0137 angiotensin II, type I receptor-associated protein         |

|        |         |       |       |       |       |       |        |        |        |        |                                                                        |
|--------|---------|-------|-------|-------|-------|-------|--------|--------|--------|--------|------------------------------------------------------------------------|
| 11610  | Agtrp   | -0.03 | 0.25  | -0.02 | -0.07 | -0.22 | 0.6812 | 0.4945 | 0.4878 | 0.4639 | 0.1403 angiotensin II, type I receptor-associated protein              |
| 23796  | Agtr1   | -0.36 | -0.71 | -1.13 | -0.77 | -1.08 | 0.3778 | 0.0214 | 0.0014 | 0.0124 | 0.0010 angiotensin receptor-like 1                                     |
| 23796  | Agtr1   | -0.09 | 0.00  | 0.03  | -0.06 | 0.00  | 0.5580 | 0.0214 | 0.0014 | 0.0124 | 0.1881 angiotensin receptor-like 1                                     |
| 11606  | Agtr    | 0.27  | 0.44  | 1.38  | 1.61  | 0.98  | 0.6028 | 0.3528 | 0.5204 | 0.3118 | 0.0304 angiotensinogen (serpin peptidase inhibitor, clade A, member 8) |
| 68743  | Anln    | 0.20  | 0.02  | 0.06  | 0.05  | 0.21  | 0.3961 | 0.4876 | 0.5576 | 0.5111 | 0.0450 anillin, actin binding protein (scraps homolog, Drosophila)     |
| 68743  | Anln    | 0.07  | -0.06 | 0.09  | -0.05 | -0.05 | 0.6179 | 0.1186 | 0.6096 | 0.4806 | 0.3883 anillin, actin binding protein (scraps homolog, Drosophila)     |
| 99896  | Ankrd50 | 0.31  | -0.23 | -0.31 | -0.12 | -0.06 | 0.2328 | 0.1166 | 0.0354 | 0.2451 | 0.3445 ankrin repeat domain 50                                         |
| 11733  | Ank1    | -0.66 | 0.99  | 0.59  | 0.26  | -0.07 | 0.1824 | 0.0066 | 0.0066 | 0.0771 | 0.4352 ankrin 1, erythroid                                             |
| 11733  | Ank1    | -0.17 | 0.05  | 0.16  | -0.08 | -0.07 | 0.2510 | 0.5274 | 0.1568 | 0.3173 | 0.2771 ankrin 1, erythroid                                             |
| 11733  | Ank1    | 0.11  | 1.43  | 0.08  | 0.17  | 0.04  | 0.5641 | 0.4063 | 0.5501 | 0.2786 | 0.3868 ankrin 1, erythroid                                             |
| 11733  | Ank1    | 0.04  | 0.07  | 0.15  | 0.08  | 0.04  | 0.6068 | 0.5192 | 0.3385 | 0.3730 | 0.3730 ankrin 1, erythroid                                             |
| 11733  | Ank1    | 0.05  | 0.35  | 0.25  | 0.46  | 0.18  | 0.6396 | 0.1725 | 0.2677 | 0.2339 | 0.1646 ankrin 1, erythroid                                             |
| 109676 | Ank2    | -0.14 | 0.03  | 0.06  | -0.05 | -0.06 | 0.4287 | 0.4392 | 0.3058 | 0.4386 | 0.3646 ankrin 2, brain                                                 |
| 109676 | Ank2    | -0.06 | 0.03  | 0.08  | 0.02  | -0.10 | 0.5365 | 0.5407 | 0.4387 | 0.4891 | 0.0984 ankrin 2, brain                                                 |
| 109676 | Ank2    | -0.03 | 0.14  | 0.01  | -0.01 | 0.01  | 0.6068 | 0.1478 | 0.5047 | 0.5238 | 0.4603 ankrin 2, brain                                                 |
| 109676 | Ank2    | -0.03 | 0.08  | 0.04  | 0.01  | 0.02  | 0.6246 | 0.2733 | 0.3769 | 0.5171 | 0.4342 ankrin 2, brain                                                 |
| 11735  | Ank3    | 0.69  | 0.26  | 0.56  | 0.90  | 1.10  | 0.0990 | 0.5227 | 0.1584 | 0.0016 | 0.0001 ankrin 3, epithelial                                            |
| 11735  | Ank3    | 0.36  | -0.10 | 0.16  | 0.55  | 0.27  | 0.2945 | 0.4309 | 0.5574 | 0.016  | 0.0507 ankrin 3, epithelial                                            |
| 319895 | Ankar   | 0.03  | 0.05  | 0.02  | -0.05 | -0.04 | 0.6340 | 0.4426 | 0.6138 | 0.4316 | 0.3139 ankrin and armadillo repeat containing                          |
| 80283  | Anb1    | -0.36 | 0.24  | -0.16 | -0.18 | -0.04 | 0.2772 | 0.5213 | 0.3220 | 0.2279 | 0.2850 ankrin repeat and BTB (POZ) domain containing 1                 |
| 99382  | Anb2    | 0.08  | 1.01  | 1.48  | 0.82  | 1.28  | 0.6378 | 0.0282 | 0.0060 | 0.0081 | 0.0077 ankrin repeat and BTB (POZ) domain containing 2                 |
| 11736  | AnkY1   | 0.02  | 0.02  | 0.07  | 0.12  | 0.07  | 0.6478 | 0.5714 | 0.3614 | 0.2905 | 0.1476 ankrin repeat and BTB (POZ) domain containing 2                 |
| 11736  | AnkY1   | 0.08  | 0.05  | -0.17 | -0.36 | -0.29 | 0.6280 | 0.5601 | 0.2812 | 0.0198 | 0.0143 ankrin repeat and FYVE domain containing 1                      |
| 70797  | Ank1    | -0.03 | 0.04  | -0.20 | -0.10 | -0.34 | 0.6284 | 0.6425 | 0.1359 | 0.2732 | 0.0720 ankrin repeat and IBR domain containing 1                       |
| 70797  | Ank1    | 0.27  | 0.09  | 0.00  | 0.05  | 0.22  | 0.1609 | 0.5646 | 0.4481 | 0.4337 | 0.0055 ankrin repeat and IBR domain containing 1                       |
| 70797  | Ank1    | 0.07  | 0.47  | 0.46  | 0.22  | 0.38  | 0.2428 | 0.5964 | 0.5219 | 0.4665 | 0.1142 ankrin repeat and IBR domain containing 1                       |
| 108957 | Ankhd1  | -0.05 | 0.03  | -0.02 | -0.03 | -0.01 | 0.6053 | 0.1115 | 0.1101 | 0.1318 | 0.0066 ankrin repeat and KH domain containing 1                        |
| 108957 | Ankhd1  | 0.03  | -0.34 | -0.82 | -0.63 | -0.78 | 0.5375 | 0.5661 | 0.5778 | 0.4552 | 0.4547 ankrin repeat and KH domain containing 1                        |
| 244859 | AnkY1   | 0.22  | 0.14  | 0.28  | 0.06  | 0.14  | 0.3796 | 0.6425 | 0.4299 | 0.3551 | 0.0665 ankrin repeat and kinase domain containing 1                    |
| 241158 | AnkY1   | -0.03 | -0.01 | -0.02 | 0.02  | 0.06  | 0.6324 | 0.6514 | 0.6180 | 0.5178 | 0.3362 ankrin repeat and MYND domain containing 1                      |
| 217473 | AnkY2   | 0.40  | -0.57 | -0.69 | -0.24 | -0.09 | 0.2369 | 0.0384 | 0.0091 | 0.1913 | 0.3446 ankrin repeat and MYND domain containing 2                      |
| 217473 | AnkY2   | 0.00  | -0.34 | -0.36 | -0.22 | -0.28 | 0.7032 | 0.0589 | 0.0227 | 0.0820 | 0.0167 ankrin repeat and MYND domain containing 2                      |
| 224650 | Ank1    | -0.05 | 0.72  | 0.74  | 0.81  | 0.15  | 0.6507 | 0.0226 | 0.0046 | 0.0078 | 0.2544 ankrin repeat and SAM domain containing 1                       |
| 217217 | Anb16   | 0.19  | -0.08 | 0.03  | 0.05  | 0.05  | 0.4927 | 0.3208 | 0.4374 | 0.4385 | 0.4541 ankrin repeat and SOCS box-containing 16                        |
| 217217 | Anb16   | -0.01 | 0.04  | 0.09  | 0.02  | 0.04  | 0.6714 | 0.6483 | 0.4919 | 0.4940 | 0.3049 ankrin repeat and SOCS box-containing 16                        |
| 208372 | Anb18   | 0.13  | -0.07 | -0.02 | -0.01 | -0.05 | 0.5025 | 0.2963 | 0.3748 | 0.5401 | 0.3908 ankrin repeat and SOCS box-containing 18                        |
| 65247  | Anb1    | -0.11 | -0.46 | -0.91 | -0.85 | -1.32 | 0.4944 | 0.0392 | 0.0003 | 0.0001 | 0.0000 ankrin repeat and SOCS box-containing protein 1                 |
| 65247  | Anb1    | 0.09  | 0.23  | 0.15  | 0.21  | 0.33  | 0.5038 | 0.2726 | 0.4265 | 0.0432 | 0.0009 ankrin repeat and SOCS box-containing protein 1                 |
| 117590 | Anb10   | -0.14 | -0.05 | 0.00  | -0.03 | -0.11 | 0.3444 | 0.5580 | 0.6148 | 0.5209 | 0.2621 ankrin repeat and SOCS box-containing protein 10                |
| 68854  | Anb11   | 0.19  | -0.10 | 0.04  | 0.28  | 0.21  | 0.3650 | 0.4337 | 0.6395 | 0.1942 | 0.1099 ankrin repeat and SOCS box-containing protein 11                |
| 70392  | Anb12   | 0.03  | -0.07 | -0.03 | 0.10  | 0.03  | 0.5924 | 0.4238 | 0.5620 | 0.1833 | 0.3949 ankrin repeat and SOCS box-containing protein 12                |
| 142888 | Anb13   | 0.33  | -0.98 | -0.67 | -0.48 | -0.62 | 0.2153 | 0.0037 | 0.0046 | 0.0062 | 0.0002 ankrin repeat and SOCS box-containing protein 13                |
| 142888 | Anb13   | 0.08  | -0.13 | -0.11 | -0.16 | -0.40 | 0.5736 | 0.2516 | 0.2310 | 0.2569 | 0.0028 ankrin repeat and SOCS box-containing protein 13                |
| 142887 | Anb14   | 0.42  | -0.77 | -0.90 | -0.23 | -0.57 | 0.6941 | 0.0609 | 0.5232 | 0.1214 | 0.0540 ankrin repeat and SOCS box-containing protein 13                |
| 78910  | Anb15   | 0.05  | 0.07  | 0.03  | -0.04 | -0.03 | 0.6107 | 0.0010 | 0.0001 | 0.2184 | 0.0006 ankrin repeat and SOCS box-containing protein 14                |
| 78910  | Anb15   | 0.03  | -0.07 | 0.01  | 0.03  | -0.03 | 0.6139 | 0.6199 | 0.5107 | 0.4009 | 0.3898 ankrin repeat and SOCS box-containing protein 15                |
| 78910  | Anb15   | -0.01 | -0.04 | -0.01 | -0.03 | -0.03 | 0.6483 | 0.4703 | 0.6403 | 0.4709 | 0.4043 ankrin repeat and SOCS box-containing protein 15                |
| 66772  | Anb17   | 0.12  | -0.04 | -0.09 | 0.00  | 0.12  | 0.6859 | 0.4054 | 0.6237 | 0.4511 | 0.3258 ankrin repeat and SOCS box-containing protein 15                |
| 65266  | Anb2    | -0.30 | -0.20 | -0.25 | 0.34  | -0.10 | 0.3332 | 0.5589 | 0.3485 | 0.5504 | 0.1213 ankrin repeat and SOCS box-containing protein 17                |
| 65257  | Anb3    | -0.11 | 0.01  | 0.03  | -0.14 | -0.08 | 0.4043 | 0.6519 | 0.5806 | 0.2565 | 0.3858 ankrin repeat and SOCS box-containing protein 2                 |
| 65257  | Anb3    | 0.28  | -0.70 | -0.78 | -0.40 | -0.48 | 0.3318 | 0.6115 | 0.5013 | 0.1475 | 0.2018 ankrin repeat and SOCS box-containing protein 3                 |
| 65257  | Anb3    | 0.19  | 0.17  | 0.56  | 0.46  | 0.90  | 0.3349 | 0.1014 | 0.0112 | 0.0164 | 0.0036 ankrin repeat and SOCS box-containing protein 3                 |
| 65257  | Anb3    | 0.04  | -0.64 | -0.69 | -0.23 | -0.33 | 0.6816 | 0.3986 | 0.3133 | 0.0508 | 0.0082 ankrin repeat and SOCS box-containing protein 3                 |
| 65255  | Anb4    | -0.25 | 0.00  | 0.24  | 0.11  | 0.19  | 0.1980 | 0.5259 | 0.0689 | 0.2375 | 0.0132 ankrin repeat and SOCS box-containing protein 4                 |
| 65255  | Anb4    | 0.00  | 0.05  | 0.11  | 0.03  | 0.03  | 0.6958 | 0.5003 | 0.2097 | 0.4860 | 0.4124 ankrin repeat and SOCS box-containing protein 4                 |
| 76294  | Anb5    | 0.05  | -0.06 | 0.07  | 0.36  | 0.36  | 0.5742 | 0.4304 | 0.5066 | 0.2840 | 0.0120 ankrin repeat and SOCS box-containing protein 5                 |
| 72323  | Anb6    | -0.11 | 0.57  | 0.64  | 0.08  | 0.46  | 0.6359 | 0.3638 | 0.2333 | 0.4860 | 0.0547 ankrin repeat and SOCS box-containing protein 6                 |
| 117589 | Anb7    | -0.13 | 0.12  | 0.03  | 0.01  | -0.08 | 0.4011 | 0.3474 | 0.5487 | 0.5270 | 0.2399 ankrin repeat and SOCS box-containing protein 7                 |
| 117589 | Anb7    | -0.10 | -0.01 | 0.03  | -0.07 | -0.11 | 0.4820 | 0.6489 | 0.5076 | 0.3840 | 0.2461 ankrin repeat and SOCS box-containing protein 7                 |
| 117589 | Anb7    | 0.02  | 0.16  | -0.07 | -0.24 | -0.13 | 0.6850 | 0.6244 | 0.4529 | 0.1974 | 0.2721 ankrin repeat and SOCS box-containing protein 7                 |
| 78541  | Anb8    | 0.43  | -0.20 | 0.57  | 0.75  | 1.14  | 0.1610 | 0.2891 | 0.1220 | 0.0020 | 0.0002 ankrin repeat and SOCS box-containing protein 8                 |
| 78541  | Anb8    | 0.31  | 0.18  | 0.70  | 0.85  | 1.19  | 0.3664 | 0.5626 | 0.0655 | 0.0080 | 0.0000 ankrin repeat and SOCS box-containing protein 8                 |
| 69299  | Anb9    | 0.15  | 0.38  | 0.55  | 0.33  | 0.68  | 0.5307 | 0.4073 | 0.1672 | 0.0400 | 0.0017 ankrin repeat and SOCS box-containing protein 8                 |
| 69299  | Anb9    | 0.00  | 0.05  | 0.07  | 0.02  | 0.06  | 0.7009 | 0.4639 | 0.2809 | 0.5179 | 0.2908 ankrin repeat and SOCS box-containing protein 9                 |
| 77531  | Ank1b   | -0.01 | -0.07 | -0.09 | -0.02 | -0.01 | 0.6664 | 0.5211 | 0.3855 | 0.4848 | 0.4451 ankrin repeat and sterile alpha motif domain containing 1B      |
| 72615  | Ank3    | -0.18 | -0.09 | -0.50 | -0.45 | -0.63 | 0.4775 | 0.3987 | 0.0683 | 0.0188 | 0.0055 ankrin repeat and sterile alpha motif domain containing 3       |
| 72615  | Ank3    | 0.10  | 0.21  | 0.19  | 0.24  | 0.50  | 0.5633 | 0.5459 | 0.5789 | 0.0174 | 0.0006 ankrin repeat and sterile alpha motif domain containing 3       |
| 72074  | Ank4b   | 0.06  | -0.04 | -0.06 | 0.05  | 0.00  | 0.5392 | 0.4435 | 0.3513 | 0.3864 | 0.4924 ankrin repeat and sterile alpha motif domain containing 4B      |
| 75991  | Ank5b   | 0.03  | 0.27  | 0.19  | 0.25  | 0.29  | 0.6765 | 0.4070 | 0.5604 | 0.1464 | 0.0918 ankrin repeat and sterile alpha motif domain containing 6       |
| 52231  | Ankd1   | -0.40 | -0.21 | -0.64 | -0.42 | -0.67 | 0.1619 | 0.4168 | 0.0656 | 0.0056 | 0.4039 ankrin repeat and zinc finger domain containing 1               |
| 52231  | Ankd1   | -0.03 | -0.01 | -0.09 | -0.04 | -0.03 | 0.6595 | 0.4988 | 0.6398 | 0.4787 | 0.0209 ankrin repeat and zinc finger domain containing 1               |
| 52231  | Ankd1   | 0.04  | -0.13 | -0.61 | -0.24 | -0.36 | 0.6600 | 0.2858 | 0.0144 | 0.0712 | 0.0000 ankrin repeat domain 1 (cardiac muscle)                         |
| 102334 | Ankd10  | 0.12  | 0.72  | 1.25  | 1.87  | 2.06  | 0.6062 | 0.2337 | 0.1422 | 0.0020 | 0.1590 ankrin repeat domain 10                                         |
| 102334 | Ankd10  | -0.51 | -0.12 | -0.37 | -0.04 | -0.25 | 0.5178 | 0.4643 | 0.5601 | 0.5207 | 0.1962 ankrin repeat domain 10                                         |
| 77087  | Ankd11  | -0.86 | 1.81  | 1.00  | -0.37 | -0.47 | 0.2699 | 0.1080 | 0.1189 | 0.3606 | 0.0010 ankrin repeat domain 11                                         |
| 77087  | Ankd11  | 0.24  | -0.03 | 0.42  | 0.77  | 1.19  | 0.5054 | 0.5847 | 0.0874 | 0.0101 | 0.0097 ankrin repeat domain 11                                         |
| 106586 | Ankd12  | 0.41  | -0.82 | -1.08 | -0.82 | -0.70 | 0.3422 | 0.0355 | 0.0027 | 0.0084 | 0.0009 ankrin repeat domain 12                                         |
| 106586 | Ankd12  | -0.63 | -0.71 | -0.85 | -0.86 | -0.87 | 0.4458 | 0.5862 | 0.5027 | 0.0021 | 0.0009 ankrin repeat domain 12                                         |
| 106586 | Ankd12  | 0.12  | 0.16  | 0.11  | 0.00  | 0.17  | 0.4677 | 0.4596 | 0.5623 | 0.5531 | 0.0472 ankrin repeat domain 12                                         |
| 106586 | Ankd12  | -0.10 | -0.07 | -0.23 | -0.13 | -0.12 | 0.5116 | 0.4202 | 0.0266 | 0.2719 | 0.2190 ankrin repeat domain 12                                         |
| 106586 | Ankd12  | -0.11 | -0.01 | -0.78 | -1.66 | -1.39 | 0.6639 | 0.5288 | 0.1256 | 0.0035 | 0.0004 ankrin repeat domain 12                                         |
| 68423  | Ankd13d | 0.02  | 0.40  | 0.54  | 0.24  | 0.61  | 0.6763 | 0.2235 | 0.0382 | 0.0943 | 0.0001 ankrin repeat domain 12                                         |
| 68423  | Ankd13d | 0.05  | 0.06  | 0.06  | 0.10  | 0.04  | 0.5745 | 0.5252 | 0.5076 | 0.1959 | 0.3450 ankrin repeat domain 13 family, member D                        |
| 68420  | Ankd13a | 0.24  | 0.04  | 0.71  | 0.96  | 1.66  | 0.6173 | 0.3969 | 0.2948 | 0.0089 | 0.0001 ankrin repeat domain 13a                                        |
| 268445 | Ankd13a | -0.06 | -0.09 | 0.58  | 0.41  | 1.77  | 0.6173 | 0.3969 | 0.2948 | 0.0089 | 0.0002 ankrin repeat domain 13a                                        |
| 433667 | Ankd13b | 0.12  | -0.21 | -0.10 | 0.17  | 0.06  | 0.5860 | 0.3157 | 0.4756 | 0.0463 | 0.4086 ankrin repeat domain 13b                                        |
| 433667 | Ankd13b | 0.56  | -0.14 | 0.06  | 0.18  | 0.54  | 0.2400 | 0.2793 | 0.5248 | 0.3214 | 0.0157 ankrin repeat domain 13c                                        |
| 320816 | Ankd16  | -0.10 | -0.04 | -0.05 | -0.09 | -0.16 | 0.4856 | 0.5465 | 0.5681 | 0.3346 | 0.1053 ankrin repeat domain 16                                         |
| 320816 | Ankd16  | -0.49 | -0.49 | -0.19 | 0.27  | 0.52  | 0.5235 | 0.6120 | 0.5362 | 0.2350 | 0.0403 ankrin repeat domain 16                                         |

|        |         |       |       |       |       |       |        |        |        |        |        |                                                                  |
|--------|---------|-------|-------|-------|-------|-------|--------|--------|--------|--------|--------|------------------------------------------------------------------|
| 81702  | Anhd17  | 0.38  | -0.36 | 0.30  | 0.34  | 0.62  | 0.4249 | 0.1547 | 0.5808 | 0.2167 | 0.0097 | ankyrin repeat domain 17                                         |
| 81702  | Anhd17  | 0.24  | -0.06 | 0.34  | 0.07  | 0.66  | 0.4551 | 0.4290 | 0.3991 | 0.4482 | 0.0014 | ankyrin repeat domain 17                                         |
| 81702  | Anhd17  | -0.06 | 0.06  | -0.08 | -0.22 | -0.24 | 0.6098 | 0.6098 | 0.2616 | 0.0583 | 0.0157 | ankyrin repeat domain 17                                         |
| 81702  | Anhd17  | 0.01  | -0.09 | 0.07  | 0.08  | 0.09  | 0.6905 | 0.6491 | 0.3427 | 0.3646 | 0.2617 | ankyrin repeat domain 17                                         |
| 56642  | Ankd2   | 0.00  | 0.06  | 0.02  | 0.00  | 0.04  | 0.6984 | 0.5390 | 0.6360 | 0.5570 | 0.3409 | ankyrin repeat domain 17                                         |
| 56642  | Ankd2   | 0.18  | -0.01 | 0.55  | 0.71  | 0.84  | 0.4062 | 0.4572 | 0.1564 | 0.1176 | 0.1443 | ankyrin repeat domain 2 (stretch responsive muscle)              |
| 52024  | Anhd22  | -0.04 | -0.02 | -0.06 | 0.03  | -0.02 | 0.5985 | 0.6361 | 0.5759 | 0.4489 | 0.4266 | ankyrin repeat domain 22                                         |
| 52024  | Anhd22  | 0.00  | -0.06 | -0.13 | 0.01  | -0.05 | 0.6969 | 0.3356 | 0.1229 | 0.5541 | 0.3777 | ankyrin repeat domain 22                                         |
| 78321  | Anhd23  | 0.43  | 0.31  | 0.63  | 1.12  | 1.15  | 0.2344 | 0.4572 | 0.0516 | 0.0138 | 0.0035 | ankyrin repeat domain 23                                         |
| 78321  | Anhd23  | 0.27  | 0.41  | 0.84  | 1.21  | 1.27  | 0.4410 | 0.4132 | 0.0258 | 0.0069 | 0.0046 | ankyrin repeat domain 23                                         |
| 70815  | Anhd24  | 0.14  | 0.07  | 0.01  | 0.04  | 0.03  | 0.3089 | 0.5090 | 0.6340 | 0.4222 | 0.3861 | ankyrin repeat domain 24                                         |
| 70815  | Anhd24  | -0.65 | -0.41 | -1.00 | -0.73 | -1.15 | 0.4547 | 0.6070 | 0.4491 | 0.0344 | 0.0007 | ankyrin repeat domain 24                                         |
| 70815  | Anhd24  | 0.06  | 0.11  | -0.06 | 0.10  | 0.05  | 0.5030 | 0.3660 | 0.3268 | 0.1830 | 0.2819 | ankyrin repeat domain 24                                         |
| 232339 | Anhd26  | -0.45 | -0.09 | -0.36 | -0.58 | -0.61 | 0.1782 | 0.5789 | 0.3705 | 0.0003 | 0.0001 | ankyrin repeat domain 24                                         |
| 232339 | Anhd26  | -0.89 | -0.18 | -0.83 | -1.29 | -1.65 | 0.2315 | 0.5812 | 0.2628 | 0.0052 | 0.0002 | ankyrin repeat domain 26                                         |
| 232339 | Anhd26  | -0.22 | 0.00  | -0.10 | -0.30 | -0.33 | 0.2683 | 0.6062 | 0.4297 | 0.0162 | 0.0097 | ankyrin repeat domain 26                                         |
| 232339 | Anhd26  | -0.38 | -0.13 | -0.75 | -1.08 | -1.40 | 0.3769 | 0.3981 | 0.0272 | 0.0007 | 0.0000 | ankyrin repeat domain 26                                         |
| 245886 | Anhd27  | -0.02 | -0.15 | -0.23 | -0.13 | -0.14 | 0.6497 | 0.3585 | 0.0671 | 0.1091 | 0.0823 | ankyrin repeat domain 26                                         |
| 245886 | Anhd27  | -0.08 | -0.18 | -0.14 | -0.20 | -0.31 | 0.5983 | 0.5271 | 0.5860 | 0.0587 | 0.0160 | ankyrin repeat domain 27 (VPS domain)                            |
| 245886 | Anhd27  | -0.09 | -0.23 | -0.12 | -1.01 | -1.41 | 0.6212 | 0.3695 | 0.0027 | 0.0012 | 0.0000 | ankyrin repeat domain 27 (VPS domain)                            |
| 245886 | Anhd27  | 0.03  | -0.12 | -0.11 | 0.06  | -0.12 | 0.6595 | 0.6263 | 0.6360 | 0.3566 | 0.1347 | ankyrin repeat domain 27 (VPS domain)                            |
| 225187 | Anhd28  | -0.09 | -0.09 | 0.03  | 0.26  | 0.26  | 0.3257 | 0.3470 | 0.4933 | 0.0229 | 0.0268 | ankyrin repeat domain 28                                         |
| 105377 | Anhd32  | -0.12 | -0.03 | 0.04  | 0.09  | 0.07  | 0.5232 | 0.6498 | 0.6424 | 0.3411 | 0.3200 | ankyrin repeat domain 29                                         |
| 105377 | Anhd32  | -0.28 | -0.13 | -0.40 | 0.01  | 0.21  | 0.2342 | 0.2810 | 0.0317 | 0.5508 | 0.1106 | ankyrin repeat domain 32                                         |
| 105377 | Anhd32  | 0.09  | -0.31 | -0.67 | -0.55 | -0.43 | 0.5645 | 0.0685 | 0.0020 | 0.0008 | 0.0031 | ankyrin repeat domain 32                                         |
| 208258 | Anhd33  | 0.00  | 0.04  | -0.03 | -0.10 | -0.06 | 0.7022 | 0.4878 | 0.3480 | 0.3649 | 0.1864 | ankyrin repeat domain 32                                         |
| 545554 | Ankd34a | 0.08  | -0.14 | -0.02 | 0.03  | -0.08 | 0.6983 | 0.2428 | 0.5954 | 0.4932 | 0.2683 | ankyrin repeat domain 33                                         |
| 218440 | Ankd34b | 0.08  | -0.01 | -0.02 | 0.04  | -0.01 | 0.5737 | 0.4473 | 0.3780 | 0.2076 | 0.2025 | ankyrin repeat domain 34A                                        |
| 218440 | Ankd34b | 0.04  | -0.03 | 0.00  | -0.02 | 0.03  | 0.4595 | 0.6506 | 0.6017 | 0.4401 | 0.4711 | ankyrin repeat domain 34B                                        |
| 330998 | Ankd34c | -0.03 | -0.01 | -0.04 | -0.04 | 0.01  | 0.5937 | 0.4522 | 0.5636 | 0.5121 | 0.3846 | ankyrin repeat domain 34B                                        |
| 213121 | Anhd35  | -0.26 | 0.23  | 0.12  | -0.09 | -0.06 | 0.1386 | 0.1540 | 0.4269 | 0.3902 | 0.4485 | ankyrin repeat domain 34C                                        |
| 76389  | Anhd36  | -0.09 | 0.00  | 0.04  | -0.12 | -0.09 | 0.3793 | 0.6083 | 0.5694 | 0.1688 | 0.1819 | ankyrin repeat domain 36                                         |
| 76389  | Anhd36  | 0.04  | 0.03  | -0.05 | 0.01  | 0.03  | 0.5959 | 0.6103 | 0.4073 | 0.5428 | 0.4593 | ankyrin repeat domain 36                                         |
| 654824 | Anhd37  | 0.13  | 0.26  | 0.25  | 0.14  | 0.21  | 0.6040 | 0.6447 | 0.6428 | 0.3789 | 0.1758 | ankyrin repeat domain 37                                         |
| 109346 | Anhd39  | 0.13  | 0.43  | -0.01 | -0.15 | -0.05 | 0.6139 | 0.4965 | 0.4034 | 0.3845 | 0.4356 | ankyrin repeat domain 39                                         |
| 109346 | Anhd39  | -0.04 | 0.10  | -0.09 | 0.04  | -0.07 | 0.6207 | 0.4850 | 0.3209 | 0.4678 | 0.2596 | ankyrin repeat domain 39                                         |
| 71452  | Anhd40  | 0.27  | -0.14 | 0.07  | 0.00  | 0.19  | 0.4933 | 0.3966 | 0.5744 | 0.5642 | 0.1985 | ankyrin repeat domain 40                                         |
| 71452  | Anhd40  | -0.47 | -0.21 | 0.03  | -0.08 | -0.23 | 0.5031 | 0.5140 | 0.3688 | 0.4215 | 0.0369 | ankyrin repeat domain 40                                         |
| 234396 | Anhd41  | 0.14  | 0.09  | 0.14  | -0.03 | 0.03  | 0.5705 | 0.5613 | 0.6120 | 0.5114 | 0.4545 | ankyrin repeat domain 40                                         |
| 73945  | Anhd42  | 0.08  | 0.02  | 0.04  | 0.01  | 0.00  | 0.5478 | 0.5286 | 0.5965 | 0.5393 | 0.4874 | ankyrin repeat domain 41                                         |
| 73945  | Anhd42  | 0.17  | -0.17 | -0.60 | -0.43 | -0.66 | 0.3741 | 0.4308 | 0.3965 | 0.4916 | 0.4121 | ankyrin repeat domain 41                                         |
| 73945  | Anhd42  | 0.05  | 0.11  | -0.11 | -0.15 | -0.17 | 0.5253 | 0.2776 | 0.0202 | 0.0132 | 0.0006 | ankyrin repeat domain 42                                         |
| 237761 | Anhd43  | -0.02 | 0.06  | 0.01  | -0.14 | -0.06 | 0.5795 | 0.4876 | 0.1583 | 0.1229 | 0.0691 | ankyrin repeat domain 42                                         |
| 329154 | Anhd44  | 0.01  | 0.04  | -0.08 | -0.05 | -0.04 | 0.3941 | 0.3941 | 0.5750 | 0.1681 | 0.3081 | ankyrin repeat domain 43                                         |
| 329154 | Anhd44  | -0.33 | 0.32  | -0.01 | -0.43 | -0.34 | 0.6677 | 0.6030 | 0.3490 | 0.3448 | 0.2251 | ankyrin repeat domain 43                                         |
| 329154 | Anhd44  | 0.27  | -0.17 | -0.17 | -0.06 | -0.02 | 0.2567 | 0.2464 | 0.5328 | 0.0412 | 0.0296 | ankyrin repeat domain 44                                         |
| 73944  | Anhd45  | 0.11  | -0.04 | 0.49  | -0.23 | -0.26 | 0.4539 | 0.0423 | 0.3142 | 0.1940 | 0.4354 | ankyrin repeat domain 44                                         |
| 73944  | Anhd45  | 0.07  | -0.07 | -0.12 | 0.02  | 0.06  | 0.4374 | 0.4383 | 0.3172 | 0.4324 | 0.0899 | ankyrin repeat domain 44                                         |
| 68839  | Anhd49  | -0.03 | -0.45 | -0.12 | -0.09 | -0.08 | 0.5170 | 0.3987 | 0.2218 | 0.5037 | 0.2849 | ankyrin repeat domain 45                                         |
| 319196 | Ankd5   | 0.56  | -0.74 | -0.58 | 0.16  | 0.27  | 0.6746 | 0.0459 | 0.4715 | 0.5037 | 0.1721 | ankyrin repeat domain 45                                         |
| 319196 | Ankd5   | 0.37  | -0.27 | -0.37 | -0.05 | -0.14 | 0.2045 | 0.0324 | 0.0650 | 0.3694 | 0.4299 | ankyrin repeat domain 46                                         |
| 319196 | Ankd5   | -0.26 | -0.25 | -0.39 | -0.23 | -0.37 | 0.3948 | 0.1278 | 0.0445 | 0.0209 | 0.1403 | ankyrin repeat domain 49                                         |
| 237615 | Anhd52  | 0.03  | 0.00  | 0.01  | 0.03  | 0.03  | 0.5248 | 0.6125 | 0.5807 | 0.4579 | 0.1395 | ankyrin repeat domain 5                                          |
| 237615 | Anhd52  | 0.28  | 0.03  | 0.15  | 0.14  | 0.31  | 0.4175 | 0.5111 | 0.6292 | 0.2351 | 0.3789 | ankyrin repeat domain 5                                          |
| 75305  | Anhd53  | -0.06 | 0.40  | 0.22  | -0.64 | -0.59 | 0.6542 | 0.4093 | 0.5756 | 0.0018 | 0.0012 | ankyrin repeat domain 52                                         |
| 223690 | Anhd54  | 0.03  | -0.03 | -0.42 | -0.42 | -0.41 | 0.6193 | 0.6117 | 0.5160 | 0.4998 | 0.4277 | ankyrin repeat domain 53                                         |
| 77318  | Anhd55  | -0.02 | 0.08  | 0.02  | -0.09 | -0.06 | 0.2844 | 0.5589 | 0.5451 | 0.0046 | 0.0205 | ankyrin repeat domain 54                                         |
| 77318  | Anhd55  | -0.06 | 0.66  | 1.07  | 0.66  | 1.01  | 0.4804 | 0.4005 | 0.5512 | 0.2264 | 0.2048 | ankyrin repeat domain 55                                         |
| 268301 | Anhd57  | 0.13  | -0.03 | 0.08  | 0.20  | 0.23  | 0.4272 | 0.6325 | 0.2942 | 0.0672 | 0.0000 | ankyrin repeat domain 57                                         |
| 268301 | Anhd57  | 0.11  | -0.80 | -0.80 | -0.52 | -0.72 | 0.4858 | 0.0054 | 0.0011 | 0.0013 | 0.0000 | ankyrin repeat domain 57                                         |
| 245381 | Anhd58  | 0.07  | -0.02 | -0.07 | 0.05  | 0.03  | 0.5416 | 0.4122 | 0.2667 | 0.3531 | 0.3697 | ankyrin repeat domain 58                                         |
| 140377 | Ankd6   | 0.19  | 0.09  | -0.06 | 0.04  | 0.07  | 0.4783 | 0.5912 | 0.3612 | 0.4511 | 0.2583 | ankyrin repeat domain 6                                          |
| 75196  | Ankd7   | -0.31 | -0.27 | -0.64 | -0.60 | -0.86 | 0.5309 | 0.5968 | 0.4747 | 0.0077 | 0.0004 | ankyrin repeat domain 6                                          |
| 75196  | Ankd7   | 0.04  | 0.02  | -0.02 | -0.09 | 0.04  | 0.5721 | 0.5680 | 0.6371 | 0.2073 | 0.3366 | ankyrin repeat domain 7                                          |
| 75196  | Ankd7   | 0.04  | -0.01 | -0.04 | -0.04 | -0.20 | 0.6163 | 0.6400 | 0.4806 | 0.4322 | 0.4764 | ankyrin repeat domain 7                                          |
| 74251  | Ankd9   | -0.23 | 0.31  | 0.19  | -0.02 | -0.20 | 0.5290 | 0.6036 | 0.6158 | 0.5443 | 0.2312 | ankyrin repeat domain 9                                          |
| 74251  | Ankd9   | 0.09  | 0.02  | 0.11  | 0.19  | 0.10  | 0.6626 | 0.4472 | 0.5503 | 0.2392 | 0.3236 | ankyrin repeat domain 9                                          |
| 68558  | Ankd2   | 0.43  | -0.56 | -0.85 | -0.02 | -0.06 | 0.0614 | 0.0261 | 0.3596 | 0.2773 | 0.3696 | ankyrin repeat, family A (RF-XANK-like), 2                       |
| 68558  | Ankd2   | -0.75 | 0.66  | -0.30 | -0.90 | -1.34 | 0.2730 | 0.4012 | 0.3775 | 0.0557 | 0.0020 | ankyrin repeat, family A (RF-XANK-like), 2                       |
| 74068  | Asz1    | 0.05  | 0.05  | -0.04 | 0.07  | 0.07  | 0.5392 | 0.6192 | 0.3596 | 0.2773 | 0.3696 | ankyrin repeat, family A (RF-XANK-like), 2                       |
| 16952  | Anx1    | 0.07  | -0.09 | -0.04 | -0.02 | -0.04 | 0.5664 | 0.3680 | 0.4690 | 0.4740 | 0.3467 | ankyrin repeat, SAM and basic leucine zipper domain containing 1 |
| 26359  | Anx10   | 0.21  | -0.50 | -0.02 | 0.04  | 0.05  | 0.6177 | 0.6236 | 0.4452 | 0.1182 | 0.0036 | annexin A1                                                       |
| 26359  | Anx10   | 0.03  | -0.01 | 0.07  | 0.04  | 0.09  | 0.5891 | 0.6236 | 0.3705 | 0.4261 | 0.2528 | annexin A10                                                      |
| 69787  | Anx11   | -0.63 | 0.37  | 0.41  | 0.12  | 0.09  | 0.1112 | 0.0652 | 0.0661 | 0.2849 | 0.2733 | annexin A11                                                      |
| 69787  | Anx13   | 0.11  | -0.03 | -0.20 | 0.04  | -0.06 | 0.4052 | 0.1745 | 0.1340 | 0.4149 | 0.2969 | annexin A13                                                      |
| 12306  | Anx2    | 0.31  | -0.18 | 0.17  | 0.37  | 0.41  | 0.3333 | 0.2135 | 0.5097 | 0.0809 | 0.0450 | annexin A2                                                       |
| 12306  | Anx2    | 0.36  | -0.08 | 0.38  | 0.71  | 0.94  | 0.4445 | 0.5149 | 0.4455 | 0.0473 | 0.0089 | annexin A2                                                       |
| 11745  | Anx3    | -0.45 | -0.24 | 0.41  | 0.42  | 0.76  | 0.5550 | 0.5077 | 0.2248 | 0.0170 | 0.0013 | annexin A3                                                       |
| 11745  | Anx3    | -0.48 | -0.61 | -0.33 | -0.06 | -0.10 | 0.0899 | 0.0300 | 0.0473 | 0.4240 | 0.0013 | annexin A4                                                       |
| 11746  | Anx4    | 0.83  | -0.06 | -0.23 | 0.37  | 0.71  | 0.1110 | 0.1632 | 0.2777 | 0.0654 | 0.0027 | annexin A4                                                       |
| 11746  | Anx4    | -0.11 | -0.06 | -0.03 | -0.17 | -0.09 | 0.4782 | 0.5848 | 0.6323 | 0.1283 | 0.2660 | annexin A4                                                       |
| 11747  | Anx5    | 0.25  | -0.16 | -0.17 | 0.15  | -0.01 | 0.4277 | 0.2910 | 0.5485 | 0.2648 | 0.4851 | annexin A5                                                       |
| 11749  | Anx6    | 0.39  | -0.41 | -0.02 | 0.31  | 0.08  | 0.3378 | 0.2209 | 0.5485 | 0.2262 | 0.3846 | annexin A6                                                       |
| 11750  | Anx7    | 0.09  | -0.35 | -0.50 | -0.60 | -0.65 | 0.6413 | 0.1782 | 0.1008 | 0.0059 | 0.0001 | annexin A6                                                       |
| 11750  | Anx7    | 0.34  | -0.27 | 0.37  | 0.37  | 0.23  | 0.3444 | 0.1209 | 0.3064 | 0.0501 | 0.1194 | annexin A7                                                       |
| 11750  | Anx7    | -0.89 | 4.20  | 2.94  | -0.49 | -0.85 | 0.4890 | 0.0145 | 0.0390 | 0.4216 | 0.2864 | annexin A7                                                       |
|        |         | -0.07 | 1.12  | 1.33  | -0.83 | 0.65  | 0.6440 | 0.0336 | 0.0093 | 0.0005 | 0.0001 | annexin A7                                                       |

|        |         |       |       |       |       |       |        |        |        |        |                                                                                             |
|--------|---------|-------|-------|-------|-------|-------|--------|--------|--------|--------|---------------------------------------------------------------------------------------------|
| 11752  | Anxa8   | 0.69  | -0.88 | -1.39 | -0.43 | -0.70 | 0.1184 | 0.0196 | 0.0002 | 0.0755 | 0.0093 annexin A8                                                                           |
| 11752  | Anxa8   | 0.52  | -0.75 | -1.24 | -0.49 | -0.76 | 0.1291 | 0.0346 | 0.0000 | 0.0440 | 0.0035 annexin A8                                                                           |
| 11752  | Anxa8   | 0.59  | -0.76 | -1.20 | -0.52 | -0.76 | 0.1467 | 0.0180 | 0.0002 | 0.0478 | 0.0240 annexin A8                                                                           |
| 11752  | Anxa8   | 0.60  | -0.68 | -1.24 | -0.40 | -0.54 | 0.1941 | 0.0308 | 0.0003 | 0.1572 | 0.0473 annexin A8                                                                           |
| 11752  | Anxa8   | 0.67  | -0.72 | -1.24 | -0.48 | -0.49 | 0.1993 | 0.0241 | 0.0003 | 0.1389 | 0.0879 annexin A8                                                                           |
| 11752  | Anxa8   | 0.63  | -0.68 | -1.12 | -0.50 | -0.43 | 0.2154 | 0.0223 | 0.0004 | 0.0967 | 0.1130 annexin A8                                                                           |
| 11752  | Anxa8   | 0.56  | -0.68 | -1.12 | -0.53 | -0.52 | 0.2309 | 0.0226 | 0.0003 | 0.0914 | 0.0639 annexin A8                                                                           |
| 11752  | Anxa8   | -0.15 | -0.79 | -1.20 | -0.35 | -0.72 | 0.6650 | 0.6349 | 0.4759 | 0.1293 | 0.0074 annexin A8                                                                           |
| 11752  | Anxa8   | -0.08 | -0.76 | -1.12 | -0.40 | -0.66 | 0.6794 | 0.6052 | 0.4380 | 0.1002 | 0.0046 annexin A8                                                                           |
| 11752  | Anxa8   | 0.02  | -0.72 | -1.08 | -0.42 | -0.66 | 0.6979 | 0.5486 | 0.4380 | 0.0864 | 0.0112 annexin A8                                                                           |
| 11790  | Anxa9   | -0.05 | -0.16 | -0.43 | 0.10  | -0.25 | 0.5710 | 0.1248 | 0.0064 | 0.2480 | 0.0371 annexin A9                                                                           |
| 232666 | Ann1    | -0.05 | 0.06  | -0.03 | -0.17 | -0.12 | 0.5860 | 0.4270 | 0.6220 | 0.1090 | 0.1482 antagonist of mitotic exit network 1 homolog (S. cerevisiae)                         |
| 23795  | Agri2   | 1.38  | -0.97 | -0.81 | -0.52 | -0.44 | 0.0558 | 0.0250 | 0.1068 | 0.0655 | 0.1476 anterior gradient 2 (Xenopus laevis)                                                 |
| 403205 | Agri3   | -0.58 | -0.27 | -0.86 | -0.55 | -0.66 | 0.2797 | 0.0536 | 0.1471 | 0.0010 | 0.0003 anterior gradient homolog 3 (Xenopus laevis)                                         |
| 403205 | Agri3   | -0.01 | -0.33 | -0.78 | -0.44 | -0.37 | 0.6960 | 0.1122 | 0.0049 | 0.0067 | 0.0116 anterior gradient homolog 3 (Xenopus laevis)                                         |
| 226548 | Aph1a   | 0.15  | -0.17 | 0.04  | 0.16  | 0.28  | 0.5456 | 0.2325 | 0.5756 | 0.3821 | 0.1065 anterior pharynx defective 1a homolog (C. elegans)                                   |
| 226548 | Aph1a   | -0.01 | -0.30 | -0.17 | -0.18 | -0.27 | 0.6961 | 0.1508 | 0.2500 | 0.1780 | 0.0739 anterior pharynx defective 1a homolog (C. elegans)                                   |
| 208117 | Aph1b   | 0.55  | -0.13 | -0.28 | -0.02 | 0.26  | 0.0565 | 0.3239 | 0.0618 | 0.5137 | 0.0270 anterior pharynx defective 1b homolog (C. elegans)                                   |
| 208117 | Aph1b   | -0.61 | -0.14 | -0.35 | -0.60 | -0.77 | 0.2459 | 0.5614 | 0.5855 | 0.0004 | 0.0009 anterior pharynx defective 1b homolog (C. elegans)                                   |
| 208117 | Aph1b   | 0.00  | 0.32  | 0.01  | -0.05 | 0.19  | 0.7019 | 0.3570 | 0.5310 | 0.4835 | 0.1577 anterior pharynx defective 1b homolog (C. elegans)                                   |
| 69338  | Aph1c   | -0.02 | -0.04 | -0.11 | 0.05  | 0.22  | 0.6738 | 0.4531 | 0.3508 | 0.4808 | 0.0481 anterior pharynx defective 1c homolog (C. elegans)                                   |
| 69338  | Aph1c   | 0.24  | -0.01 | 0.15  | 0.13  | 0.03  | 0.3684 | 0.5023 | 0.5990 | 0.1920 | 0.4400 anthrax toxin receptor 1                                                             |
| 171914 | Anhr2   | 0.58  | -0.32 | -0.30 | 0.05  | -0.22 | 0.3684 | 0.5023 | 0.5990 | 0.1920 | 0.1461 anthrax toxin receptor 2                                                             |
| 239029 | Anhr1   | 0.22  | -0.11 | -0.12 | 0.06  | -0.06 | 0.4282 | 0.3210 | 0.2749 | 0.3941 | 0.2947 anthrax toxin receptor-like                                                          |
| 239029 | Anhr1   | 0.07  | -0.16 | -0.33 | -0.08 | -0.07 | 0.4861 | 0.1620 | 0.2133 | 0.3109 | 0.2217 anthrax toxin receptor-like                                                          |
| 17345  | Mkl67   | 0.11  | 0.11  | 0.69  | -0.20 | 0.17  | 0.5873 | 0.6475 | 0.1076 | 0.1737 | 0.1548 antigen identified by monoclonal antibody Ki 67                                      |
| 17345  | Mkl67   | -0.08 | 0.40  | 0.89  | -0.25 | 0.23  | 0.6425 | 0.6545 | 0.0660 | 0.1625 | 0.1753 antigen identified by monoclonal antibody Ki 67                                      |
| 30060  | Mlf2    | -0.12 | 0.14  | 0.33  | 0.14  | -0.03 | 0.5862 | 0.6545 | 0.4800 | 0.4020 | 0.4586 antigen p97 (melanoma associated) identified by monoclonal antibodies 133.2 and 96.5 |
| 16588  | Kin     | -0.32 | -0.31 | -0.59 | -0.75 | -0.71 | 0.2321 | 0.5163 | 0.2765 | 0.0049 | 0.0029 antigenic determinant of rec-A protein                                               |
| 378700 | Anh     | 0.11  | 0.09  | -0.09 | -0.08 | -0.04 | 0.3295 | 0.2446 | 0.3125 | 0.3116 | 0.0344 antigenic determinant of rec-A protein                                               |
| 11705  | Anh     | -0.19 | 0.04  | 0.12  | -0.19 | -0.15 | 0.4565 | 0.5968 | 0.5275 | 0.2577 | 0.3742 antimicrobial peptide RYA3                                                           |
| 110542 | Air     | -1.22 | 0.32  | 0.03  | -0.34 | -0.63 | 0.0332 | 0.5196 | 0.5142 | 0.0682 | 0.2563 anti-Mullerian hormone                                                               |
| 104103 | Air     | -0.17 | 0.35  | 0.41  | -0.03 | -0.05 | 0.4883 | 0.0509 | 0.0228 | 0.4954 | 0.0028 anti-Mullerian hormone type 2 receptor                                               |
| 104103 | Air     | -0.07 | -0.03 | 0.11  | 0.05  | 0.21  | 0.5393 | 0.6547 | 0.3675 | 0.3506 | 0.3839 antisense lgr2r RNA                                                                  |
| 104103 | Air     | 0.03  | 0.03  | 0.05  | 0.00  | 0.00  | 0.6152 | 0.6082 | 0.5487 | 0.5609 | 0.0339 antisense lgr2r RNA                                                                  |
| 54375  | Azn1    | 0.80  | -0.54 | -0.84 | -0.27 | 0.14  | 0.1406 | 0.1015 | 0.0365 | 0.4888 | 0.4919 antisense inhibitor 1                                                                |
| 54375  | Azn1    | 0.23  | -0.07 | -0.49 | -0.05 | -0.28 | 0.2938 | 0.4066 | 0.0094 | 0.0467 | 0.0106 antizyme inhibitor 1                                                                 |
| 54375  | Azn1    | 0.36  | 0.46  | 0.22  | -0.33 | -0.31 | 0.3618 | 0.1596 | 0.2494 | 0.2076 | 0.1548 antizyme inhibitor 1                                                                 |
| 217030 | Ap1gbb1 | -0.56 | -0.20 | -0.14 | -0.23 | -0.46 | 0.3589 | 0.2868 | 0.3363 | 0.1629 | 0.0027 AP1 gamma subunit binding protein 1                                                  |
| 269774 | Aak1    | -0.36 | 0.49  | 0.04  | -0.23 | -0.45 | 0.3203 | 0.2323 | 0.5056 | 0.1730 | 0.0549 AP2 associated kinase 1                                                              |
| 269774 | Aak1    | 0.31  | -0.09 | 0.05  | 0.16  | 0.04  | 0.4179 | 0.3159 | 0.4603 | 0.1160 | 0.3581 AP2 associated kinase 1                                                              |
| 269774 | Aak1    | -0.06 | -0.35 | 0.35  | 0.50  | 0.34  | 0.6163 | 0.0449 | 0.0505 | 0.0106 | 0.0406 AP2 associated kinase 1                                                              |
| 56369  | Apip    | 0.20  | -0.26 | -0.59 | -0.46 | -0.74 | 0.4324 | 0.1372 | 0.0137 | 0.0064 | 0.0002 APAF1 interacting protein                                                            |
| 30378  | Apin    | 0.51  | 0.14  | -0.77 | -0.28 | -1.24 | 0.1758 | 0.4719 | 0.0087 | 0.2024 | 0.0003 apelin                                                                               |
| 30378  | Apin    | 0.24  | 0.09  | -0.41 | -0.23 | -0.85 | 0.3602 | 0.5337 | 0.0195 | 0.1273 | 0.0002 apelin                                                                               |
| 30378  | Apin    | -0.08 | -0.01 | -0.43 | -0.45 | -0.55 | 0.6219 | 0.6313 | 0.1620 | 0.0668 | 0.0004 apelin                                                                               |
| 69665  | Atcf    | 0.06  | -0.04 | -0.13 | 0.07  | -0.46 | 0.5447 | 0.4772 | 0.3965 | 0.3853 | 0.3053 APOBEC1 complementation factor                                                       |
| 11806  | Apoa1   | 0.20  | -0.02 | -0.20 | 0.61  | 0.48  | 0.3136 | 0.5919 | 0.1582 | 0.2797 | 0.1671 apolipoprotein A-I                                                                   |
| 11806  | Apoa1   | 0.30  | -0.13 | -0.21 | 0.63  | 0.45  | 0.3280 | 0.4501 | 0.3239 | 0.2450 | 0.2060 apolipoprotein A-I                                                                   |
| 11806  | Apoa1   | 0.15  | 0.02  | -0.20 | 0.43  | 0.42  | 0.4470 | 0.5815 | 0.1581 | 0.3555 | 0.2185 apolipoprotein A-I                                                                   |
| 11806  | Apoa1   | 0.18  | -0.11 | -0.21 | 0.53  | 0.42  | 0.4514 | 0.5391 | 0.3304 | 0.3120 | 0.2164 apolipoprotein A-I                                                                   |
| 11806  | Apoa1   | 0.16  | 0.05  | -0.11 | 0.65  | 0.44  | 0.5001 | 0.5650 | 0.5503 | 0.2741 | 0.1999 apolipoprotein A-I                                                                   |
| 11806  | Apoa1   | 0.10  | 0.01  | -0.19 | 0.51  | 0.36  | 0.5290 | 0.6270 | 0.2459 | 0.2779 | 0.2567 apolipoprotein A-I                                                                   |
| 11806  | Apoa1   | 0.11  | 0.03  | 0.02  | 0.48  | 0.43  | 0.5467 | 0.5813 | 0.5497 | 0.3185 | 0.2268 apolipoprotein A-I                                                                   |
| 11806  | Apoa1   | 0.12  | 0.05  | -0.14 | 0.62  | 0.46  | 0.5470 | 0.5429 | 0.5300 | 0.2804 | 0.1856 apolipoprotein A-I                                                                   |
| 11806  | Apoa1   | 0.03  | 0.08  | -0.13 | 0.58  | 0.42  | 0.6420 | 0.5185 | 0.5239 | 0.2796 | 0.2139 apolipoprotein A-I                                                                   |
| 11806  | Apoa1   | -0.05 | 0.05  | -0.17 | 0.51  | 0.36  | 0.6792 | 0.5298 | 0.4561 | 0.3246 | 0.2558 apolipoprotein A-I                                                                   |
| 246703 | Apoa1bp | -0.03 | 0.06  | -0.17 | 0.51  | 0.36  | 0.6792 | 0.5298 | 0.4561 | 0.3246 | 0.2558 apolipoprotein A-I                                                                   |
| 246703 | Apoa1bp | 0.20  | -0.74 | -0.87 | -0.28 | -0.60 | 0.5290 | 0.0363 | 0.0042 | 0.2565 | 0.0229 apolipoprotein A-I binding protein                                                   |
| 11807  | Apoa2   | 0.14  | -0.17 | -0.28 | 0.65  | 0.63  | 0.5507 | 0.4868 | 0.3203 | 0.3168 | 0.2254 apolipoprotein A-II                                                                  |
| 11808  | Apoa4   | -0.07 | 0.19  | -0.01 | -0.02 | -0.02 | 0.5721 | 0.2468 | 0.1944 | 0.4921 | 0.0417 apolipoprotein B                                                                     |
| 66113  | Apoa5   | 0.14  | 0.06  | -0.11 | 0.29  | 0.24  | 0.4298 | 0.6263 | 0.1944 | 0.2263 | 0.3712 apolipoprotein B                                                                     |
| 66113  | Apoa5   | 0.12  | -0.04 | -0.23 | 0.48  | 0.38  | 0.5448 | 0.6263 | 0.2617 | 0.3224 | 0.0417 apolipoprotein B editing complex 1                                                   |
| 238055 | Apoa5   | 0.25  | -0.27 | -0.16 | 0.29  | 0.28  | 0.2543 | 0.0557 | 0.1263 | 0.2129 | 0.2462 apolipoprotein B editing complex 1                                                   |
| 238055 | Apoa5   | -0.11 | -0.02 | 0.07  | 0.20  | 0.21  | 0.3268 | 0.6236 | 0.3119 | 0.3390 | 0.4104 apolipoprotein B editing complex 2                                                   |
| 238055 | Apoa5   | 0.12  | -0.12 | 0.02  | 0.05  | 0.11  | 0.3825 | 0.2698 | 0.6323 | 0.3358 | 0.0000 apolipoprotein B editing complex 3                                                   |
| 238055 | Apoa5   | 0.05  | -0.07 | -0.07 | -0.02 | 0.03  | 0.5975 | 0.5415 | 0.5438 | 0.4921 | 0.4727 apolipoprotein B editing complex 3                                                   |
| 11810  | Apoa6c1 | 0.05  | -0.10 | 0.02  | 0.68  | 0.00  | 0.5218 | 0.5218 | 0.5316 | 0.4696 | 0.4928 apolipoprotein B mRNA editing enzyme, catalytic polypeptide-like 4 (putative)        |
| 11810  | Apoa6c1 | 0.08  | 0.12  | 0.02  | 0.00  | 0.08  | 0.6607 | 0.2584 | 0.1260 | 0.0381 | 0.0597 apolipoprotein B mRNA editing enzyme, catalytic polypeptide-like 4 (putative)        |
| 11811  | Apoa6c2 | -0.88 | -0.19 | 0.35  | 0.39  | -0.15 | 0.6017 | 0.6338 | 0.2690 | 0.4223 | 0.0035 apolipoprotein B48 receptor                                                          |
| 80287  | Apoa6c3 | -1.25 | 0.98  | 0.88  | 1.43  | 1.75  | 0.1739 | 0.6465 | 0.4588 | 0.5594 | 0.0016 apolipoprotein C-I                                                                   |
| 80287  | Apoa6c3 | -0.25 | -0.02 | -0.13 | -0.20 | -0.01 | 0.1542 | 0.3205 | 0.3444 | 0.0004 | 0.0016 apolipoprotein C-II                                                                  |
| 71281  | Apoa6c4 | 0.08  | -0.04 | 0.06  | 0.03  | 0.00  | 0.1766 | 0.6368 | 0.2335 | 0.0876 | 0.2142 apolipoprotein C-III                                                                 |
| 171504 | Apoa6c4 | 0.02  | -0.22 | -0.26 | -0.16 | -0.15 | 0.5290 | 0.5218 | 0.5316 | 0.4696 | 0.1676 apolipoprotein C-IV                                                                  |
| 171504 | Apoa6c4 | -0.22 | 0.24  | -0.30 | -0.24 | -0.64 | 0.3892 | 0.4717 | 0.1068 | 0.0977 | 0.2143 apolipoprotein D                                                                     |
| 11812  | Apoa1   | 0.41  | -0.29 | -0.61 | 0.05  | -0.34 | 0.3451 | 0.2921 | 0.0408 | 0.5163 | 0.0156 apolipoprotein E                                                                     |
| 11813  | Apoa2   | -1.32 | 0.76  | 0.52  | -0.03 | -0.69 | 0.0859 | 0.1301 | 0.1429 | 0.5292 | 0.0528 apolipoprotein E                                                                     |
| 11814  | Apoa3   | -0.15 | -0.01 | -0.03 | 0.48  | 0.40  | 0.3392 | 0.6462 | 0.5906 | 0.2063 | 0.0844 apolipoprotein E                                                                     |
| 11814  | Apoa3   | 0.24  | -0.21 | -0.21 | 0.59  | 0.36  | 0.4005 | 0.3991 | 0.3654 | 0.2453 | 0.2058 apolipoprotein E                                                                     |
| 11425  | Apoa4   | 0.11  | 0.03  | -0.12 | 0.44  | 0.30  | 0.5429 | 0.6409 | 0.3792 | 0.2791 | 0.1175 apolipoprotein E                                                                     |
| 11815  | Apoa4   | 0.17  | 0.03  | 0.01  | 0.00  | 0.13  | 0.5097 | 0.5282 | 0.4661 | 0.5631 | 0.1424 apolipoprotein E                                                                     |
| 11816  | Apoa4   | 0.37  | 0.09  | 0.04  | 0.36  | 0.42  | 0.3586 | 0.5977 | 0.5336 | 0.0269 | 0.3559 apolipoprotein E                                                                     |
| 11816  | Apoa4   | 0.24  | 0.02  | 0.00  | 0.40  | 0.25  | 0.3714 | 0.6502 | 0.6295 | 0.0457 | 0.0836 apolipoprotein E                                                                     |
| 11816  | Apoa4   | 0.21  | 0.11  | 0.08  | 0.31  | 0.31  | 0.4176 | 0.6229 | 0.6405 | 0.0511 | 0.2193 apolipoprotein F                                                                     |
| 11816  | Apoa4   | 0.23  | 0.01  | 0.01  | 0.25  | 0.07  | 0.4314 | 0.5572 | 0.5638 | 0.1553 |                                                                                             |
| 11816  | Apoa4   | 0.17  | 0.20  | 0.17  | 0.35  | 0.24  | 0.4884 | 0.5577 | 0.5997 | 0.0362 |                                                                                             |
| 11816  | Apoa4   | 0.23  | 0.01  | 0.01  | 0.25  | 0.07  | 0.4884 | 0.5577 | 0.5997 | 0.0362 |                                                                                             |
| 11816  | Apoa4   | -0.61 | 0.05  | 0.08  | 0.40  | 0.14  | 0.5205 | 0.3875 | 0.3591 | 0.0522 |                                                                                             |
| 11816  | Apoa4   | -0.29 | 0.15  | 0.15  | 0.33  | 0.18  | 0.5248 | 0.3098 | 0.3170 | 0.0576 |                                                                                             |
| 11816  | Apoa4   | -0.30 | 0.05  | 0.10  | 0.32  | 0.16  | 0.3793 | 0.3493 | 0.3493 | 0.0670 |                                                                                             |
| 11816  | Apoa4   | -0.12 | -0.02 | -0.12 | 0.25  | 0.08  | 0.5586 | 0.5622 | 0.6095 | 0.1163 |                                                                                             |
| 11816  | Apoa4   | 0.10  | 0.15  | 0.08  | 0.10  | 0.25  | 0.5177 | 0.5177 | 0.6090 | 0.0558 |                                                                                             |
| 103161 | Apoa4   | 0.15  | -0.12 | -0.15 | 0.41  | 0.25  | 0.3815 | 0.4307 | 0.2958 | 0.3112 |                                                                                             |

|        |         |       |       |       |       |       |        |        |        |        |                                                              |
|--------|---------|-------|-------|-------|-------|-------|--------|--------|--------|--------|--------------------------------------------------------------|
| 11818  | Apoh    | 0.29  | -0.23 | -0.30 | 0.67  | 0.64  | 0.4677 | 0.5027 | 0.4069 | 0.3144 | 0.1832 apolipoprotein H                                      |
| 245282 | Apol10a | 0.26  | -0.02 | -0.12 | -0.07 | -0.11 | 0.2775 | 0.4435 | 0.2025 | 0.2680 | 0.1409 apolipoprotein L 10a                                  |
| 328561 | Apol10b | 0.82  | -0.24 | -0.85 | -0.57 | -0.61 | 0.2114 | 0.5498 | 0.2670 | 0.0052 | 0.0009 apolipoprotein L 10b                                  |
| 328563 | Apol11b | 1.34  | -0.41 | -0.69 | -0.51 | -0.60 | 0.1473 | 0.5190 | 0.2679 | 0.0090 | 0.0063 apolipoprotein L 11b                                  |
| 71939  | Apol6   | 0.39  | 0.08  | 0.14  | 0.08  | -0.32 | 0.5604 | 0.4743 | 0.5653 | 0.5037 | 0.3542 apolipoprotein L 6                                    |
| 75761  | Apol7a  | 0.06  | 0.12  | -0.02 | 0.18  | -0.02 | 0.5986 | 0.5986 | 0.3945 | 0.3861 | 0.4340 apolipoprotein L 7a                                   |
| 108956 | Apol7a  | 0.03  | -0.52 | -0.55 | -0.56 | -0.68 | 0.5867 | 0.0048 | 0.0020 | 0.0092 | 0.0006 apolipoprotein L 7a                                   |
| 108956 | Apol7c  | 0.12  | -0.46 | -0.45 | -0.26 | -0.32 | 0.4277 | 0.0062 | 0.0025 | 0.0298 | 0.0047 apolipoprotein L 7c                                   |
| 108956 | Apol7c  | -0.12 | -1.19 | -1.17 | -1.24 | -1.34 | 0.5810 | 0.0023 | 0.0015 | 0.0001 | 0.0000 apolipoprotein L 7c                                   |
| 239552 | Apol8   | -0.09 | 0.21  | 0.40  | 0.16  | 0.31  | 0.5028 | 0.1191 | 0.0301 | 0.1217 | 0.0082 apolipoprotein L 8                                    |
| 239552 | Apol8   | -0.03 | 1.90  | 2.83  | 2.06  | 2.46  | 0.6163 | 0.0000 | 0.0000 | 0.0000 | 0.0000 apolipoprotein L 8                                    |
| 71898  | Apol9b  | -0.62 | 0.00  | -0.59 | -0.67 | -1.25 | 0.3156 | 0.5081 | 0.0601 | 0.0133 | 0.0003 apolipoprotein L 9b                                   |
| 55938  | Apom    | -0.02 | 0.15  | 0.13  | 0.50  | 0.32  | 0.6833 | 0.2322 | 0.3032 | 0.2671 | 0.1158 apolipoprotein M                                      |
| 28194  | Apom    | -0.08 | 0.03  | -0.15 | 0.09  | -0.01 | 0.5038 | 0.4639 | 0.3151 | 0.4685 | 0.4662 apolipoprotein N                                      |
| 68316  | Apo0    | 0.53  | -0.89 | -0.81 | -0.12 | -0.07 | 0.1853 | 0.0059 | 0.0033 | 0.4475 | 0.4065 apolipoprotein O                                      |
| 68117  | Apo0    | 0.36  | -0.28 | -0.27 | -0.09 | -0.08 | 0.2209 | 0.1439 | 0.1084 | 0.3850 | 0.2861 apolipoprotein Olike                                  |
| 68117  | Apo0    | 0.12  | -0.08 | -0.29 | -0.24 | -0.26 | 0.3433 | 0.0480 | 0.1057 | 0.0643 | 0.0216 apolipoprotein Olike                                  |
| 68117  | Apo0    | 0.27  | -0.40 | -0.23 | 0.05  | 0.18  | 0.3598 | 0.2661 | 0.4420 | 0.3946 | 0.0390 apolipoprotein Olike                                  |
| 68117  | Apo0    | -0.07 | -0.41 | -0.34 | 0.02  | 0.02  | 0.6132 | 0.2019 | 0.2947 | 0.3182 | 0.4490 apolipoprotein Olike                                  |
| 56321  | Ataf    | -0.28 | 0.65  | 0.27  | -0.31 | -0.06 | 0.3633 | 0.0221 | 0.1921 | 0.0508 | 0.3828 apolipais antagonizing transcription factor           |
| 56321  | Ataf    | -0.25 | 1.15  | 0.46  | -0.28 | -0.17 | 0.4523 | 0.0147 | 0.2024 | 0.1723 | 0.2374 apolipais antagonizing transcription factor           |
| 11800  | Ataf5   | -0.51 | 0.36  | 0.43  | -0.03 | -0.02 | 0.1673 | 0.0980 | 0.0499 | 0.5196 | 0.4670 apolipais inhibitor 5                                 |
| 11800  | Ataf5   | 0.32  | -0.03 | 0.26  | 0.18  | 0.54  | 0.3173 | 0.4199 | 0.5182 | 0.2025 | 0.0011 apolipais inhibitor 5                                 |
| 74268  | Aven    | 0.39  | 0.00  | -0.05 | 0.24  | 0.20  | 0.1866 | 0.4570 | 0.3306 | 0.0331 | 0.0610 apolipais, caspase activation inhibitor               |
| 74268  | Aven    | -0.07 | 0.00  | 0.10  | -0.08 | -0.06 | 0.5781 | 0.6474 | 0.3927 | 0.3699 | 0.3364 apolipais, caspase activation inhibitor               |
| 74268  | Aven    | 0.02  | -0.05 | 0.00  | -0.05 | -0.02 | 0.6277 | 0.5695 | 0.5721 | 0.3094 | 0.4254 apolipais, caspase activation inhibitor               |
| 11302  | Atalk   | -0.74 | 1.03  | 0.39  | -0.17 | -0.47 | 0.4352 | 0.0751 | 0.2379 | 0.4401 | 0.1430 apolipais-associated tyrosine kinase                  |
| 26926  | Alfm1   | 0.43  | -0.25 | -0.23 | 0.32  | 0.30  | 0.2086 | 0.4201 | 0.3528 | 0.0936 | 0.0939 apolipais-inducing factor, mitochondrion-associated 1 |
| 71361  | Alfm1   | 0.11  | -0.69 | -0.56 | 0.12  | 0.21  | 0.6674 | 0.6073 | 0.6382 | 0.4133 | 0.2458 apolipais-inducing factor, mitochondrion-associated 1 |
| 71361  | Alfm2   | 0.23  | -0.19 | 0.17  | 0.20  | 0.42  | 0.2763 | 0.3257 | 0.5090 | 0.2385 | 0.0036 apolipais-inducing factor, mitochondrion-associated 2 |
| 71361  | Alfm2   | -1.24 | 0.28  | -0.01 | -0.43 | -0.75 | 0.3553 | 0.3196 | 0.4138 | 0.1070 | 0.0080 apolipais-inducing factor, mitochondrion-associated 2 |
| 72168  | Alfm3   | -0.05 | 0.06  | 0.10  | -0.05 | 0.01  | 0.5996 | 0.5780 | 0.4672 | 0.4337 | 0.4565 apolipais-inducing factor, mitochondrion-associated 3 |
| 69928  | Apd1    | -0.09 | -0.01 | -0.11 | -0.22 | -0.16 | 0.4901 | 0.5659 | 0.4647 | 0.0445 | 0.0691 apolipais-inducing, TAF9-like domain 1                |
| 56215  | Acin1   | -0.44 | 1.19  | -0.20 | -1.01 | -0.94 | 0.5730 | 0.6426 | 0.4383 | 0.5135 | 0.4013 apolipais-inducing, TAF9-like domain 1                |
| 56215  | Acin1   | -0.13 | 0.19  | -0.30 | -0.07 | -0.05 | 0.6000 | 0.3873 | 0.5191 | 0.4684 | 0.0219 apolipotic chromatin condensation inducer 1           |
| 56215  | Acin1   | -0.05 | 0.62  | 0.24  | -0.11 | 0.12  | 0.6530 | 0.1267 | 0.5781 | 0.4014 | 0.4162 apolipotic chromatin condensation inducer 1           |
| 11783  | Apaf1   | 0.19  | 0.06  | 0.05  | 0.00  | 0.18  | 0.6587 | 0.2065 | 0.0176 | 0.0003 | 0.2798 apolipotic chromatin condensation inducer 1           |
| 11783  | Apaf1   | -0.14 | -0.86 | -1.31 | -0.65 | -1.11 | 0.4057 | 0.5728 | 0.5268 | 0.5596 | 0.0000 apolipotic chromatin condensation inducer 1           |
| 66408  | Apaf1   | -0.01 | -0.07 | -0.03 | -0.08 | -0.09 | 0.6783 | 0.3715 | 0.5664 | 0.2502 | 0.0611 apolipotic peptidase activating factor 1              |
| 11783  | Apaf1   | 0.14  | 0.10  | -0.52 | -0.16 | -0.54 | 0.5852 | 0.5648 | 0.0446 | 0.2935 | 0.0000 apolipotic peptidase activating factor 1              |
| 11783  | Apaf1   | 0.27  | 0.01  | -0.03 | 0.21  | 0.38  | 0.4728 | 0.4792 | 0.4233 | 0.3746 | 0.1672 apolipotic peptidase activating factor 1              |
| 77622  | ApeX1   | 0.33  | -0.73 | -0.35 | -0.34 | -0.31 | 0.2732 | 0.0117 | 0.0859 | 0.0219 | 0.0953 apurinic/apyrimidinic endonuclease 1                  |
| 77622  | ApeX2   | 0.08  | -0.10 | -0.06 | 0.00  | -0.07 | 0.4379 | 0.3574 | 0.4982 | 0.5637 | 0.1739 apurinic/apyrimidinic endonuclease 2                  |
| 77622  | ApeX2   | 0.07  | -0.02 | 0.00  | 0.00  | -0.01 | 0.5252 | 0.4667 | 0.5001 | 0.5555 | 0.2589 apurinic/apyrimidinic endonuclease 2                  |
| 11826  | Ap1     | -0.10 | 0.41  | 0.44  | 0.32  | 0.58  | 0.5429 | 0.0661 | 0.0364 | 0.0251 | 0.4573 apurinic/apyrimidinic endonuclease 2                  |
| 66333  | Ap11    | 0.09  | -0.10 | -0.07 | 0.19  | 0.12  | 0.5612 | 0.3828 | 0.4736 | 0.2108 | 0.0012 aquaporin 1                                           |
| 208760 | Ap12    | 0.00  | 0.04  | 0.06  | 0.07  | 0.03  | 0.6991 | 0.5864 | 0.5050 | 0.3210 | 0.1391 aquaporin 11                                          |
| 11827  | Ap2     | -0.29 | -0.06 | 0.26  | 0.09  | -0.22 | 0.4209 | 0.5223 | 0.2624 | 0.4301 | 0.4270 aquaporin 12                                          |
| 11828  | Ap3     | 0.46  | -0.34 | -0.61 | 0.48  | 0.34  | 0.4444 | 0.3674 | 0.2091 | 0.3224 | 0.1075 aquaporin 2                                           |
| 11829  | Ap4     | 0.23  | -0.27 | -0.35 | -0.10 | -0.12 | 0.1820 | 0.0408 | 0.0075 | 0.3044 | 0.2172 aquaporin 3                                           |
| 11829  | Ap4     | 0.12  | -0.04 | -0.20 | -0.03 | -0.04 | 0.3890 | 0.5391 | 0.0542 | 0.4853 | 0.1729 aquaporin 4                                           |
| 11829  | Ap4     | 0.01  | -0.12 | -0.08 | -0.05 | -0.09 | 0.6805 | 0.2093 | 0.3226 | 0.3876 | 0.4055 aquaporin 4                                           |
| 11830  | Ap5     | 0.02  | 0.18  | -0.27 | -0.36 | -0.18 | 0.6901 | 0.5904 | 0.1880 | 0.0639 | 0.2533 aquaporin 4                                           |
| 11831  | Ap6     | -0.07 | 0.05  | 0.00  | -0.06 | -0.01 | 0.5330 | 0.3787 | 0.5427 | 0.3586 | 0.1267 aquaporin 5                                           |
| 11832  | Ap7     | 0.08  | -0.21 | -0.11 | -0.01 | -0.16 | 0.6011 | 0.4077 | 0.6074 | 0.5543 | 0.4760 aquaporin 6                                           |
| 11832  | Ap7     | 0.03  | -0.24 | -0.05 | -0.15 | -0.22 | 0.6761 | 0.1385 | 0.5269 | 0.3633 | 0.1504 aquaporin 7                                           |
| 11833  | Ap8     | 0.31  | -0.09 | -0.10 | 0.42  | 0.24  | 0.3412 | 0.3443 | 0.3095 | 0.1193 | 0.2019 aquaporin 7                                           |
| 64008  | Ap8     | 0.16  | -0.12 | 0.00  | 0.09  | 0.07  | 0.4674 | 0.1764 | 0.4674 | 0.2490 | 0.1815 aquaporin 8                                           |
| 64008  | Ap9     | -0.04 | 0.07  | 0.08  | 0.07  | 0.06  | 0.4490 | 0.5732 | 0.5156 | 0.2844 | 0.2623 aquaporin 8                                           |
| 64008  | Ap9     | 0.08  | 0.02  | 0.09  | 0.07  | 0.06  | 0.5958 | 0.5546 | 0.3013 | 0.3633 | 0.2396 aquaporin 9                                           |
| 11834  | Aqr     | 0.65  | -0.91 | -0.47 | 0.27  | 0.26  | 0.1650 | 0.0261 | 0.1276 | 0.2004 | 0.1571 aquaporin 9                                           |
| 11834  | Aqr     | 0.51  | -0.63 | -0.63 | -0.10 | -0.12 | 0.1659 | 0.0119 | 0.0066 | 0.3372 | 0.3124 aquaporin 9                                           |
| 11834  | Aqr     | -0.24 | 0.00  | 0.10  | 0.41  | 0.62  | 0.6853 | 0.6204 | 0.3855 | 0.0405 | 0.1571 aquaporin 9                                           |
| 11834  | Aqr     | -0.59 | 1.00  | 0.66  | 0.16  | 0.37  | 0.2132 | 0.0145 | 0.0032 | 0.3900 | 0.0028 aquaporin 9                                           |
| 11864  | Alox12  | -0.46 | 1.55  | 0.74  | 0.07  | 0.32  | 0.4277 | 0.0065 | 0.0711 | 0.5172 | 0.1657 arachidonate 12-lipoxygenase                          |
| 11864  | Alox12  | -0.10 | 0.10  | 0.12  | 0.18  | -0.01 | 0.4343 | 0.3899 | 0.2620 | 0.3871 | 0.2557 arachidonate 12-lipoxygenase                          |
| 11866  | Alox12b | 0.06  | 0.29  | 0.36  | -0.08 | -0.09 | 0.6711 | 0.6280 | 0.6360 | 0.4195 | 0.4639 arachidonate 12-lipoxygenase, 12R type                |
| 11687  | Alox15  | 0.15  | -0.32 | -0.02 | 0.41  | 0.61  | 0.5568 | 0.3062 | 0.6030 | 0.1391 | 0.2669 arachidonate 12-lipoxygenase, 12R type                |
| 11689  | Alox5   | -0.49 | -0.02 | -0.12 | -0.04 | -0.19 | 0.1763 | 0.5540 | 0.6349 | 0.4105 | 0.0424 arachidonate 15-lipoxygenase                          |
| 11689  | Alox5   | -0.69 | -0.11 | -0.26 | -0.03 | -0.06 | 0.3785 | 0.4824 | 0.5391 | 0.4777 | 0.1523 arachidonate 5-lipoxygenase                           |
| 11689  | Alox5   | 0.11  | -0.21 | -0.13 |       |       |        |        |        |        |                                                              |



|        |        |       |       |       |       |       |        |        |        |                |                                                                                          |
|--------|--------|-------|-------|-------|-------|-------|--------|--------|--------|----------------|------------------------------------------------------------------------------------------|
| 57344  | As3mt  | 0.21  | 0.27  | -0.22 | -0.15 | -0.30 | 0.4777 | 0.5025 | 0.1899 | 0.2618         | 0.0205 arsenic (+3 oxidation state) methyltransferase                                    |
| 57344  | As3mt  | -0.22 | 0.17  | 0.09  | 0.15  | -0.04 | 0.5164 | 0.2995 | 0.3142 | 0.2223         | 0.4072 arsenic (+3 oxidation state) methyltransferase                                    |
| 11876  | Arn    | 0.19  | 0.42  | 0.66  | 0.62  | 0.77  | 0.3132 | 0.0647 | 0.0008 | 0.0000 artemin |                                                                                          |
| 68865  | Arv1   | 0.17  | -0.30 | -0.47 | -0.36 | -0.50 | 0.4724 | 0.0704 | 0.0101 | 0.0197         | 0.0038 ARV1 homolog (yeast)                                                              |
| 11863  | Arnt   | 0.10  | -0.09 | 0.04  | 0.23  | 0.14  | 0.5387 | 0.3684 | 0.6098 | 0.0760         | 0.1542 aryl hydrocarbon receptor nuclear translocator                                    |
| 11863  | Arnt   | -0.08 | -0.10 | 0.00  | -0.23 | -0.02 | 0.5864 | 0.2738 | 0.4697 | 0.0903         | 0.4399 aryl hydrocarbon receptor nuclear translocator                                    |
| 11863  | Arnt   | 0.06  | 0.58  | 0.29  | 0.05  | 0.21  | 0.6570 | 0.1552 | 0.4332 | 0.5015         | 0.2403 aryl hydrocarbon receptor nuclear translocator                                    |
| 11863  | Arnt   | 0.01  | 0.39  | 0.53  | 0.28  | 0.52  | 0.6778 | 0.0091 | 0.0039 | 0.0119         | 0.0003 aryl hydrocarbon receptor nuclear translocator                                    |
| 11864  | Arnt2  | 0.01  | 0.10  | 0.14  | 0.27  | 0.80  | 0.6775 | 0.5012 | 0.3136 | 0.4664         | 0.3081 aryl hydrocarbon receptor nuclear translocator 2                                  |
| 11865  | Arnt2  | 0.05  | 1.42  | 2.27  | 1.80  | 2.90  | 0.6546 | 0.0043 | 0.0001 | 0.0000         | 0.0000 aryl hydrocarbon receptor nuclear translocator-like                               |
| 272322 | Arnt22 | -0.13 | 0.19  | -0.02 | -0.17 | -0.12 | 0.3462 | 0.1798 | 0.4481 | 0.0580         | 0.1088 aryl hydrocarbon receptor nuclear translocator-like 2                             |
| 11298  | Aanat  | 0.00  | 0.05  | 0.03  | -0.03 | 0.00  | 0.7016 | 0.5995 | 0.6383 | 0.4758         | 0.4850 aryl hydrocarbon receptor nuclear translocator-like 2                             |
| 114230 | Ap1    | 0.06  | 0.33  | 0.54  | 0.47  | 0.86  | 0.5463 | 0.0368 | 0.0082 | 0.0008         | 0.0000 aryl hydrocarbon receptor-interacting protein-like 1                              |
| 114230 | Ap1    | -0.06 | 0.04  | 0.22  | 0.01  | 0.15  | 0.5724 | 0.5335 | 0.1080 | 0.5393         | 0.0630 aryl hydrocarbon receptor-interacting protein-like 1                              |
| 114230 | Ap1    | 0.02  | 0.06  | 0.11  | 0.07  | 0.22  | 0.6569 | 0.5043 | 0.2624 | 0.2496         | 0.0082 aryl hydrocarbon receptor-interacting protein-like 1                              |
| 114230 | Ap1    | 0.01  | 0.06  | 0.11  | 0.07  | 0.22  | 0.6961 | 0.5313 | 0.5999 | 0.3163         | 0.4851 aryl hydrocarbon receptor-interacting protein-like 1                              |
| 67758  | Aadac1 | 0.13  | 0.00  | 0.01  | 0.41  | 0.46  | 0.4981 | 0.5671 | 0.5693 | 0.2881         | 0.0483 arylacetamide deacetylase (esterase)                                              |
| 320024 | Aadac1 | 0.15  | -0.22 | -0.32 | -0.05 | -0.08 | 0.5151 | 0.1475 | 0.0715 | 0.4790         | 0.3475 arylacetamide deacetylase-like 1                                                  |
| 11298  | Aanat  | 0.29  | -0.04 | 0.05  | 0.17  | 0.02  | 0.4338 | 0.3779 | 0.4618 | 0.3153         | 0.4486 arylalkylamine N-acetyltransferase                                                |
| 11298  | Aanat  | 0.01  | -0.02 | -0.02 | -0.03 | -0.07 | 0.6734 | 0.5691 | 0.5472 | 0.4779         | 0.2727 arylalkylamine N-acetyltransferase                                                |
| 71562  | Almid  | 0.23  | 0.07  | 0.55  | 0.62  | 0.94  | 0.3203 | 0.6475 | 0.0519 | 0.0024         | 0.0000 arylformamidase                                                                   |
| 71562  | Almid  | -0.04 | 0.12  | -0.06 | -0.05 | 0.05  | 0.6335 | 0.5883 | 0.2943 | 0.3806         | 0.3435 arylformamidase                                                                   |
| 11622  | Ahr    | 0.41  | -1.21 | -0.73 | -0.68 | -0.24 | 0.3277 | 0.0024 | 0.0189 | 0.0473         | 0.2135 aryl hydrocarbon receptor                                                         |
| 11622  | Ahr    | 0.26  | -1.17 | -0.67 | -0.66 | -0.22 | 0.4277 | 0.0023 | 0.0212 | 0.0392         | 0.2117 aryl hydrocarbon receptor                                                         |
| 11622  | Ahr    | 0.32  | -1.13 | -0.64 | -0.71 | -0.07 | 0.4315 | 0.0032 | 0.0232 | 0.0692         | 0.4347 aryl hydrocarbon receptor                                                         |
| 11622  | Ahr    | 0.22  | -1.19 | -0.76 | -0.72 | -0.24 | 0.5158 | 0.0012 | 0.0103 | 0.0542         | 0.2692 aryl hydrocarbon receptor                                                         |
| 11622  | Ahr    | -0.48 | -1.09 | -0.54 | -0.66 | -0.16 | 0.5347 | 0.4674 | 0.6202 | 0.0442         | 0.3646 aryl hydrocarbon receptor                                                         |
| 11622  | Ahr    | -0.48 | -1.15 | -0.59 | -0.67 | -0.20 | 0.5416 | 0.4528 | 0.6339 | 0.0394         | 0.3134 aryl hydrocarbon receptor                                                         |
| 11622  | Ahr    | -0.37 | -1.19 | -0.58 | -0.74 | -0.20 | 0.5531 | 0.3184 | 0.6169 | 0.0322         | 0.3099 aryl hydrocarbon receptor                                                         |
| 11622  | Ahr    | -0.29 | -1.11 | -0.61 | -0.74 | -0.21 | 0.5623 | 0.1969 | 0.5146 | 0.0298         | 0.3110 aryl hydrocarbon receptor                                                         |
| 11622  | Ahr    | 0.16  | -1.06 | -0.53 | -0.78 | -0.16 | 0.5642 | 0.0019 | 0.0498 | 0.0339         | 0.3649 aryl hydrocarbon receptor                                                         |
| 11622  | Ahr    | 0.14  | -1.10 | -0.65 | -0.75 | -0.29 | 0.5682 | 0.0007 | 0.0131 | 0.0297         | 0.2078 aryl hydrocarbon receptor                                                         |
| 11622  | Ahr    | -0.04 | -0.03 | -0.01 | -0.01 | -0.11 | 0.5921 | 0.4426 | 0.5111 | 0.5307         | 0.1628 aryl hydrocarbon receptor repressor                                               |
| 11632  | Aip    | -0.03 | -0.14 | -0.26 | -0.11 | -0.30 | 0.6820 | 0.3296 | 0.1399 | 0.4087         | 0.0981 aryl hydrocarbon receptor-interacting protein                                     |
| 11883  | Arca   | 0.18  | 0.06  | -0.22 | 0.08  | -0.15 | 0.4792 | 0.6285 | 0.2398 | 0.3582         | 0.4162 arylsulfatase A                                                                   |
| 11883  | Arca   | 0.28  | -0.17 | -0.24 | -0.15 | -0.14 | 0.3792 | 0.3115 | 0.2085 | 0.2289         | 0.1579 arylsulfatase B                                                                   |
| 11881  | Arab   | 0.24  | -0.23 | -0.09 | 0.06  | 0.03  | 0.3845 | 0.1454 | 0.3080 | 0.4469         | 0.4257 arylsulfatase B                                                                   |
| 11881  | Arab   | 0.00  | 0.03  | 0.00  | 0.00  | -0.03 | 0.6951 | 0.6412 | 0.5963 | 0.5548         | 0.4268 arylsulfatase B                                                                   |
| 74008  | Arsg   | 0.16  | 0.09  | 0.16  | 0.23  | 0.21  | 0.4746 | 0.6201 | 0.5774 | 0.1425         | 0.0736 arylsulfatase G                                                                   |
| 545260 | Arsl   | 0.03  | 0.11  | 0.55  | 0.03  | 0.40  | 0.6715 | 0.6490 | 0.0744 | 0.4933         | 0.0051 arylsulfatase I                                                                   |
| 271970 | Arsl   | 0.23  | 0.11  | 0.14  | 0.16  | 0.28  | 0.3186 | 0.5708 | 0.5378 | 0.0771         | 0.0087 arylsulfatase J                                                                   |
| 77041  | Arsk   | 0.44  | -0.47 | -0.34 | -0.06 | 0.04  | 0.1255 | 0.0238 | 0.0219 | 0.4296         | 0.4076 arylsulfatase K                                                                   |
| 77041  | Arsk   | 0.31  | -0.16 | -0.13 | 0.21  | 0.04  | 0.2673 | 0.2093 | 0.2598 | 0.0480         | 0.4080 arylsulfatase K                                                                   |
| 66403  | Asf1a  | 0.34  | -0.25 | 0.14  | 0.37  | 0.94  | 0.2538 | 0.2871 | 0.3545 | 0.0657         | 0.0060 ASF1 anti-silencing function 1 homolog A (S. cerevisiae)                          |
| 66403  | Asf1a  | 0.25  | -0.26 | -0.11 | 0.09  | -0.02 | 0.3462 | 0.1419 | 0.3411 | 0.3368         | 0.0389 ASF1 anti-silencing function 1 homolog A (S. cerevisiae)                          |
| 66929  | Asf1b  | 0.26  | -0.21 | 0.06  | -0.06 | -0.02 | 0.4203 | 0.2453 | 0.6138 | 0.4888         | 0.0789 ASF1 anti-silencing function 1 homolog B (S. cerevisiae)                          |
| 192195 | Asf11  | 0.33  | -0.17 | -0.31 | -0.04 | -0.06 | 0.3230 | 0.3253 | 0.0607 | 0.4927         | 0.4024 asf1 (absent, small, or homeotic-like (Drosophila))                               |
| 192195 | Asf11  | 0.31  | 0.20  | -0.02 | -0.04 | -0.13 | 0.4066 | 0.6095 | 0.4406 | 0.0956         | 0.2175 asf1 (absent, small, or homeotic-like (Drosophila))                               |
| 192195 | Asf11  | -0.15 | -0.20 | -0.01 | -0.54 | -0.42 | 0.5319 | 0.2543 | 0.4606 | 0.0051         | 0.0055 asf1 (absent, small, or homeotic-like (Drosophila))                               |
| 23908  | Asf21  | 0.38  | -0.12 | -0.28 | 0.01  | 0.01  | 0.3507 | 0.3378 | 0.2346 | 0.5582         | 0.4780 asf2 (absent, small, or homeotic-like (Drosophila))                               |
| 11889  | Asgr1  | 0.16  | -0.53 | -1.01 | -0.66 | -1.00 | 0.3972 | 0.0137 | 0.0007 | 0.0012         | 0.0000 asialogyoprotein receptor 1                                                       |
| 11889  | Asgr1  | -0.06 | 0.38  | -0.61 | -0.46 | -1.37 | 0.6638 | 0.5687 | 0.0745 | 0.1311         | 0.1016 asialogyoprotein receptor 2                                                       |
| 11890  | Asgr2  | 0.23  | 0.29  | -0.21 | -0.05 | -0.42 | 0.5066 | 0.4528 | 0.2821 | 0.5303         | 0.4470 asp (abnormal spindle)-like, microcephaly associated (Drosophila)                 |
| 12316  | Aspm   | 0.18  | -0.17 | -0.09 | 0.01  | 0.04  | 0.1743 | 0.1268 | 0.3132 | 0.5126         | 0.2451 asp (abnormal spindle)-like, microcephaly associated (Drosophila)                 |
| 12316  | Aspm   | 0.19  | -0.15 | -0.08 | 0.04  | 0.09  | 0.2540 | 0.1239 | 0.3370 | 0.4761         | 0.2846 asp (abnormal spindle)-like, microcephaly associated (Drosophila)                 |
| 12316  | Aspm   | -0.09 | -0.08 | 0.00  | -0.07 | -0.06 | 0.5097 | 0.5229 | 0.5818 | 0.2902         | 0.3615 asp (abnormal spindle)-like, microcephaly associated (Drosophila)                 |
| 66514  | Asrg1  | -0.01 | -0.01 | 0.07  | 0.00  | 0.04  | 0.6759 | 0.6326 | 0.4295 | 0.5599         | 0.1048 asparaginase like 1                                                               |
| 70553  | Asns   | 0.02  | 0.31  | -0.28 | 0.00  | -0.21 | 0.6847 | 0.2511 | 0.0891 | 0.5632         | 0.0315 asparaginase like 1                                                               |
| 70396  | Asnsd1 | 0.54  | -0.17 | -0.04 | 0.43  | 0.43  | 0.2232 | 0.3610 | 0.4453 | 0.1264         | 0.0315 asparaginase like 1                                                               |
| 208211 | Ag1    | -0.82 | 0.24  | -0.06 | -0.33 | -0.68 | 0.1796 | 0.0290 | 0.0028 | 0.3290         | 0.3181 asparagine synthetase domain containing 1                                         |
| 207958 | Ag11   | 0.39  | -0.73 | -0.49 | -0.11 | 0.10  | 0.1993 | 0.2493 | 0.4605 | 0.0583         | 0.0005 asparagine-linked glycosylation 1 homolog (yeast, alpha-1,4-mannosyltransferase)  |
| 207958 | Ag11   | 0.30  | -0.21 | -0.38 | -0.21 | -0.18 | 0.2198 | 0.1057 | 0.0301 | 0.3673         | 0.2629 asparagine-linked glycosylation 11 homolog (yeast, alpha-1,2-mannosyltransferase) |
| 223774 | Ag12   | 0.10  | -0.14 | -0.04 | 0.05  | 0.23  | 0.5016 | 0.2285 | 0.0258 | 0.0561         | 0.0363 asparagine-linked glycosylation 11 homolog (yeast, alpha-1,2-mannosyltransferase) |
| 223774 | Ag12   | -0.04 | -0.17 | -0.19 | -0.17 | -0.13 | 0.6528 | 0.2485 | 0.1764 | 0.4386         | 0.0533 asparagine-linked glycosylation 12 homolog (yeast, alpha-1,2-mannosyltransferase) |
| 67574  | Ag13   | 0.32  | -0.34 | -0.14 | 0.07  | 0.30  |        |        |        |                |                                                                                          |

|        |         |       |       |       |       |       |        |        |        |        |                                                           |
|--------|---------|-------|-------|-------|-------|-------|--------|--------|--------|--------|-----------------------------------------------------------|
| 13437  | Dnpep   | 0.18  | -0.27 | -0.26 | -0.11 | 0.15  | 0.5558 | 0.1812 | 0.1808 | 0.4492 | 0.3005 aspartyl aminopeptidase                            |
| 13437  | Dnpep   | -0.11 | 0.06  | 0.38  | 0.39  | 0.31  | 0.6116 | 0.6310 | 0.2712 | 0.1525 | 0.1736 aspartyl aminopeptidase                            |
| 11593  | Agg     | 0.35  | -0.35 | -0.29 | 0.18  | 0.27  | 0.3111 | 0.0867 | 0.2581 | 0.3219 | 0.1290 aspartylglucosaminidase                            |
| 226414 | Dars    | 1.19  | -0.63 | -0.80 | 0.36  | 0.31  | 0.0099 | 0.1122 | 0.0050 | 0.0899 | 0.0665 aspartyl-rRNA synthetase                           |
| 226414 | Dars    | 0.18  | -0.40 | -0.34 | -0.24 | -0.16 | 0.2141 | 0.0062 | 0.0050 | 0.0219 | 0.0553 aspartyl-rRNA synthetase                           |
| 226414 | Dars    | 0.02  | -0.01 | -0.07 | -0.10 | 0.01  | 0.6556 | 0.6057 | 0.5541 | 0.1974 | 0.4712 aspartyl-rRNA synthetase                           |
| 226414 | Dars    | 0.01  | 0.28  | -0.32 | -0.45 | -0.45 | 0.6909 | 0.1284 | 0.0293 | 0.0546 | 0.0575 aspartyl-rRNA synthetase                           |
| 226539 | Dars2   | 0.25  | -0.32 | -0.65 | -0.30 | -0.40 | 0.3651 | 0.0719 | 0.0089 | 0.0296 | 0.0053 aspartyl-rRNA synthetase 2 (mitochondrial)         |
| 66695  | Aspn    | 0.42  | -0.44 | -0.04 | 0.14  | 0.13  | 0.2273 | 0.0187 | 0.4404 | 0.3505 | 0.3071 aspinin                                            |
| 215095 | Asfl    | 0.02  | 0.04  | -0.05 | 0.09  | 0.10  | 0.6448 | 0.6076 | 0.4063 | 0.2507 | 0.1748 astacin-like metalloendopeptidase (M12 family)     |
| 66595  | Aste1   | -0.07 | 0.00  | 0.01  | -0.03 | -0.09 | 0.5898 | 0.5460 | 0.5427 | 0.4938 | 0.2899 asteroid homolog 1 (Drosophila)                    |
| 11899  | Astn1   | 0.07  | -0.02 | -0.05 | -0.06 | -0.06 | 0.5830 | 0.4231 | 0.3346 | 0.3355 | 0.2502 astrotactin 1                                      |
| 11899  | Astn1   | 0.01  | -0.01 | 0.05  | 0.04  | -0.05 | 0.6900 | 0.6293 | 0.4969 | 0.3601 | 0.2902 astrotactin 1                                      |
| 56079  | Astn2   | 0.06  | 0.05  | -0.01 | 0.07  | 0.06  | 0.4721 | 0.3823 | 0.6424 | 0.3091 | 0.2334 astrotactin 2                                      |
| 56079  | Astn2   | -0.02 | 0.01  | 0.03  | 0.09  | 0.08  | 0.6594 | 0.5631 | 0.5371 | 0.3049 | 0.2850 astrotactin 2                                      |
| 226747 | Ahcfl1  | -0.75 | 0.70  | 0.94  | 0.53  | 0.66  | 0.4095 | 0.1247 | 0.0615 | 0.0462 | 0.0067 AT hook containing transcription factor 1          |
| 226747 | Ahcfl1  | 0.20  | -0.29 | -0.29 | -0.25 | -0.30 | 0.4314 | 0.0893 | 0.0727 | 0.0213 | 0.0093 AT hook containing transcription factor 1          |
| 226747 | Ahcfl1  | 0.11  | -0.07 | 0.05  | 0.16  | 0.37  | 0.4933 | 0.5589 | 0.5013 | 0.1710 | 0.0070 AT hook containing transcription factor 1          |
| 230793 | Ahdc1   | -0.75 | -0.01 | 0.27  | -0.27 | -0.20 | 0.1679 | 0.4460 | 0.1448 | 0.1661 | 0.2099 AT hook, DNA binding motif, containing 1           |
| 230793 | Ahdc1   | -0.04 | 0.10  | 0.04  | 0.00  | 0.02  | 0.6163 | 0.3423 | 0.4406 | 0.5627 | 0.4552 AT hook, DNA binding motif, containing 1           |
| 93760  | Arid1a  | -0.50 | 0.10  | -0.25 | 0.40  | 0.05  | 0.6351 | 0.6060 | 0.4817 | 0.1969 | 0.0954 AT rich interactive domain 1A (Swi1 like)          |
| 239885 | Arid1b  | -0.27 | 1.06  | -0.25 | 0.55  | 0.70  | 0.6351 | 0.6060 | 0.4817 | 0.1969 | 0.0245 AT rich interactive domain 1B (Swi1 like)          |
| 239885 | Arid1b  | 0.01  | 0.35  | 0.22  | 0.40  | 0.05  | 0.6961 | 0.6198 | 0.4255 | 0.0906 | 0.4926 AT rich interactive domain 1A (Swi1 like)          |
| 77044  | Arid2   | 0.13  | 0.22  | 0.05  | 0.38  | 0.55  | 0.5677 | 0.5142 | 0.0346 | 0.0462 | 0.0032 AT rich interactive domain 2 (Ard-rk like)         |
| 77044  | Arid2   | -0.32 | -0.51 | -0.29 | -0.14 | 0.16  | 0.5712 | 0.6522 | 0.3249 | 0.0346 | 0.2533 AT rich interactive domain 2 (Ard-rk like)         |
| 13496  | Arid3a  | -1.23 | 1.15  | 1.06  | -0.15 | -0.52 | 0.1400 | 0.0551 | 0.0442 | 0.2560 | 0.0619 AT rich interactive domain 3A (Bright like)        |
| 56380  | Arid3b  | -0.30 | 0.14  | 0.76  | -0.14 | 0.37  | 0.4667 | 0.5901 | 0.2203 | 0.2958 | 0.0400 AT rich interactive domain 3B (Bright like)        |
| 56380  | Arid3b  | -0.08 | -0.01 | 0.43  | -0.07 | 0.30  | 0.6421 | 0.4921 | 0.4163 | 0.4535 | 0.0208 AT rich interactive domain 3B (Bright like)        |
| 56380  | Arid3b  | -0.03 | 0.05  | 0.49  | -0.09 | 0.15  | 0.6811 | 0.5275 | 0.4454 | 0.4620 | 0.1960 AT rich interactive domain 4A (Rbp1 like)          |
| 238247 | Arid4a  | 0.46  | 0.17  | 0.28  | 0.15  | 0.28  | 0.0558 | 0.4109 | 0.1969 | 0.1022 | 0.0067 AT rich interactive domain 4A (Rbp1 like)          |
| 238247 | Arid4a  | -0.05 | -0.08 | -0.26 | -0.30 | 0.04  | 0.6171 | 0.4329 | 0.0573 | 0.0328 | 0.4438 AT rich interactive domain 4A (Rbp1 like)          |
| 238247 | Arid4a  | 0.28  | -0.16 | 0.06  | 0.07  | 0.16  | 0.2341 | 0.1878 | 0.6194 | 0.4175 | 0.0147 AT rich interactive domain 4B (Rbp1 like)          |
| 94246  | Arid4b  | 0.28  | -0.16 | 0.06  | 0.07  | 0.16  | 0.2341 | 0.1878 | 0.6194 | 0.4175 | 0.1819 AT rich interactive domain 4B (Rbp1 like)          |
| 94246  | Arid4b  | 0.01  | -0.07 | 0.01  | 0.08  | 0.02  | 0.6789 | 0.3914 | 0.6040 | 0.2553 | 0.1124 AT rich interactive domain 4B (Rbp1 like)          |
| 94246  | Arid4b  | -0.61 | 0.81  | 0.65  | -0.03 | -0.10 | 0.1869 | 0.2277 | 0.2079 | 0.5143 | 0.4515 AT rich interactive domain 4B (Rbp1 like)          |
| 214855 | Arid5a  | -0.28 | 0.35  | 2.50  | 2.17  | 2.44  | 0.6105 | 0.0185 | 0.0006 | 0.0032 | 0.2621 AT rich interactive domain 5A (Mrf1 like)          |
| 71371  | Arid5b  | -1.33 | 0.60  | 0.60  | 0.78  | -1.51 | 0.2877 | 0.6287 | 0.1684 | 0.1310 | 0.0000 AT rich interactive domain 5A (Mrf1 like)          |
| 71371  | Arid5b  | -0.06 | 0.08  | 0.23  | 0.15  | 0.22  | 0.5381 | 0.1474 | 0.5585 | 0.0132 | 0.0477 AT rich interactive domain 5B (Mrf1 like)          |
| 71371  | Arid5b  | -0.05 | 0.05  | 0.12  | -0.14 | 0.14  | 0.5908 | 0.1903 | 0.3526 | 0.3347 | 0.0170 AT rich interactive domain 5B (Mrf1 like)          |
| 11920  | Atm     | 0.22  | -0.25 | -0.56 | 0.01  | 0.14  | 0.3392 | 0.1693 | 0.0046 | 0.0148 | 0.0378 ataxia telangiectasia mutated homolog (human)      |
| 11920  | Atm     | 0.35  | -0.14 | -0.36 | -0.13 | -0.26 | 0.3435 | 0.2859 | 0.0461 | 0.2422 | 0.3860 ataxia telangiectasia mutated homolog (human)      |
| 11920  | Atm     | 0.28  | -0.06 | -0.35 | -0.20 | -0.16 | 0.3527 | 0.3802 | 0.0726 | 0.1942 | 0.2462 ataxia telangiectasia mutated homolog (human)      |
| 11920  | Atm     | 0.26  | -0.33 | -0.46 | -0.09 | -0.21 | 0.3943 | 0.1025 | 0.0217 | 0.3539 | 0.0623 ataxia telangiectasia mutated homolog (human)      |
| 11920  | Atm     | -0.21 | -0.05 | -0.37 | -0.29 | -0.21 | 0.4314 | 0.6050 | 0.2426 | 0.0161 | 0.0604 ataxia telangiectasia mutated homolog (human)      |
| 11920  | Atm     | -0.21 | -0.20 | -0.45 | -0.36 | -0.34 | 0.4699 | 0.6379 | 0.3100 | 0.0080 | 0.0017 ataxia telangiectasia mutated homolog (human)      |
| 11920  | Atm     | -0.14 | -0.05 | -0.36 | -0.28 | -0.29 | 0.5303 | 0.5609 | 0.3126 | 0.0765 | 0.0264 ataxia telangiectasia mutated homolog (human)      |
| 11920  | Atm     | 0.11  | -0.03 | -0.40 | -0.27 | -0.17 | 0.5484 | 0.4571 | 0.0240 | 0.0847 | 0.1761 ataxia telangiectasia mutated homolog (human)      |
| 11920  | Atm     | 0.10  | -0.15 | -0.42 | -0.22 | -0.24 | 0.5523 | 0.3874 | 0.0385 | 0.1081 | 0.1020 ataxia telangiectasia mutated homolog (human)      |
| 11920  | Atm     | -0.09 | -0.09 | -0.45 | -0.31 | -0.30 | 0.5723 | 0.6041 | 0.1121 | 0.0109 | 0.0108 ataxia telangiectasia mutated homolog (human)      |
| 11920  | Atm     | 0.09  | 0.04  | -0.38 | -0.17 | -0.14 | 0.6163 | 0.5968 | 0.0617 | 0.2782 | 0.2874 ataxia telangiectasia mutated homolog (human)      |
| 16467  | Atcay   | -0.29 | 0.03  | 0.03  | -0.17 | -0.15 | 0.1089 | 0.4987 | 0.4926 | 0.0953 | 0.1187 ataxia, cerebellar, Cayman type homolog (human)    |
| 20238  | Atnx1   | 0.37  | -0.16 | 0.04  | 0.33  | 0.78  | 0.2214 | 0.3726 | 0.6100 | 0.0201 | 0.3667 ataxia, cerebellar, Cayman type homolog (human)    |
| 20238  | Atnx1   | 0.04  | 0.54  | 0.61  | 0.12  | 0.45  | 0.6610 | 0.2348 | 0.1312 | 0.2437 | 0.0002 ataxin 1                                           |
| 54138  | Atnx10  | -0.80 | 0.28  | 0.37  | 0.03  | -0.27 | 0.3516 | 0.2735 | 0.2097 | 0.5341 | 0.0005 ataxin 10                                          |
| 54138  | Atnx10  | 0.02  | -0.10 | -0.47 | -0.26 | -0.52 | 0.6685 | 0.2925 | 0.0123 | 0.0659 | 0.0010 ataxin 10                                          |
| 52335  | Atnx11  | 0.24  | 0.11  | 0.37  | 0.41  | 0.73  | 0.4277 | 0.6224 | 0.4383 | 0.0364 | 0.0005 ataxin 1-like                                      |
| 52335  | Atnx11  | -0.02 | 0.05  | 0.12  | -0.02 | 0.03  | 0.5984 | 0.6224 | 0.4585 | 0.5060 | 0.4733 ataxin 1-like                                      |
| 20239  | Atnx2   | -0.54 | -0.59 | -0.57 | -0.92 | -0.95 | 0.2434 | 0.2580 | 0.2791 | 0.1023 | 0.0001 ataxin 2                                           |
| 20239  | Atnx2   | 0.70  | -0.60 | -0.31 | 0.52  | 0.31  | 0.2646 | 0.0988 | 0.2791 | 0.1023 | 0.0001 ataxin 2                                           |
| 20239  | Atnx2   | -0.58 | -0.29 | -0.66 | -0.61 | -0.95 | 0.3127 | 0.6404 | 0.2893 | 0.0149 | 0.0022 ataxin 2                                           |
| 20239  | Atnx2   | -0.03 | -0.26 | -0.33 | -0.29 | -0.31 | 0.6677 | 0.1031 | 0.0673 | 0.0448 | 0.0159 ataxin 2                                           |
| 268959 | A2bp1   | 0.22  | -0.05 | 0.03  | 0.33  | 0.06  | 0.3919 | 0.3642 | 0.4920 | 0.2266 | 0.3644 ataxin 2 binding protein 1                         |
| 233871 | Atnx2l  | -0.38 | -0.22 | -0.08 | 0.21  | 0.35  | 0.5861 | 0.5037 | 0.4281 | 0.3038 | 0.1069 ataxin 2-like                                      |
| 110616 | Atnx3   | 0.39  | -0.26 | -0.29 | 0.07  | -0.04 | 0.1263 | 0.1544 | 0.0364 | 0.4025 | 0.4096 ataxin 3                                           |
| 110616 | Atnx3   | -0.64 | 0.31  | 0.20  | -0.27 | 0.06  | 0.2377 | 0.1374 | 0.2227 | 0.2713 | 0.4283 ataxin 3                                           |
| 246103 | Atnx7   | -1.04 | 0.65  | 0.07  | -0.73 | -0.43 | 0.2707 | 0.1214 | 0.3696 | 0.0963 | 0.1895 ataxin 7                                           |
| 380753 | Atnx7l1 | -0.21 | 0.17  | -0.02 | -0.20 | -0.19 | 0.2242 | 0.2062 | 0.6360 | 0.0361 | 0.0444 ataxin 7-like 1                                    |
| 380753 | Atnx7l1 | 0.05  | 0.21  | 0.38  | 0.26  | 0.31  | 0.5946 | 0.1314 | 0.0634 | 0.0956 | 0.0409 ATG2 autophagy related 2 homolog A (S. cerevisiae) |
| 380753 | Atnx7l1 | 0.03  | -0.21 | -0.24 | -0.16 | -0.07 | 0.6494 | 0.1044 | 0.0693 | 0.2058 | 0.0089 ATG2 autophagy related 2 homolog A (S. cerevisiae) |
| 72522  | Atnx7l2 | -0.35 | 0.50  | 0.52  | -0.05 | -0.24 | 0.2927 | 0.1781 | 0.1699 | 0.4866 | 0.0484 ATG2 autophagy related 2 homolog B (S. cerevisiae) |
| 217218 | Atnx7l3 | -0.06 | 0.42  | 0.25  | -0.37 | -0.28 | 0.6500 | 0.3730 | 0.5732 | 0.0850 | 0.2924 ATG2 autophagy related 2 homolog B (S. cerevisiae) |
| 69332  | Le1p1   | -0.07 | 0.02  | 0.02  | -0.04 | -0.05 | 0.4978 | 0.6144 | 0.5952 | 0.4365 | 0.0794 ATG3 autophagy related 2 homolog B (S. cerevisiae) |
| 329015 | Alg2a   | 0.10  | -0.27 | 0.01  | 0.29  | 0.60  | 0.5501 | 0.3064 | 0.6405 | 0.1268 | 0.0003 ATG3 autophagy related 2 homolog A (S. cerevisiae) |
| 329015 | Alg2a   | 0.12  | 0.07  | 0.41  | 0.48  | 0.82  | 0.6144 | 0.6097 | 0.3685 | 0.0394 | 0.0009 ATG3 autophagy related 2 homolog A (S. cerevisiae) |
| 76559  | Alg2b   | 0.00  | -0.04 | -0.09 | -0.10 | -0.02 | 0.6959 | 0.5839 | 0.3536 | 0.3695 | 0.0084 ATG3 autophagy related 2 homolog B (S. cerevisiae) |
| 76559  | Alg2b   | -0.05 | -0.05 | 0.08  | 0.01  | 0.07  | 0.5736 | 0.6081 | 0.2647 | 0.3186 | 0.0996 ATG3 autophagy related 2 homolog B (S. cerevisiae) |
| 76559  | Alg2b   | -0.04 | -0.10 | -0.11 | -0.06 | -0.11 | 0.6068 | 0.4775 | 0.4407 | 0.3186 | 0.0996 ATG3 autophagy related 2 homolog B (S. cerevisiae) |
| 213948 | Alg9b   | -0.07 | 0.33  | 0.35  | 0.22  | 0.29  | 0.6392 | 0.4005 | 0.3248 | 0.1954 | 0.2999 ATG9 autophagy related 9 homolog B (S. cerevisiae) |
| 123974 | Atn1    | 0.02  | -0.03 | 0.03  | -0.01 | 0.04  | 0.6578 | 0.4963 | 0.5687 | 0.5297 | 0.0794 ATG9 autophagy related 9 homolog B (S. cerevisiae) |
| 100182 | Atn1    | -0.28 | -0.33 | -0.69 | -0.56 | -1.02 | 0.3666 | 0.1242 | 0.0267 | 0.0028 | 0.0000 Atn1, acid trehalase-like 1 (Yeast)                |
| 234776 | Atnin   | -0.80 | 0.20  | -0.13 | -0.38 | -0.82 | 0.2002 | 0.2785 | 0.5344 | 0.0901 | 0.0017 AT-hook transcription factor                       |
| 234776 | Atnin   | -0.57 | -0.19 | -1.38 | -0.31 | -0.51 | 0.3629 | 0.5595 | 0.6249 | 0.0610 | 0.0082 ATM interactor                                     |
| 11921  | Atnh1   | -0.11 | 0.91  | 1.29  | 0.86  | 1.31  | 0.6093 | 0.0566 | 0.0150 | 0.0013 | 0.0000 ATM interactor                                     |
| 53404  | Atnh7   | 0.00  | 0.00  | 0.03  | -0.10 | -0.08 | 0.7008 | 0.5707 | 0.6399 | 0.2753 | 0.2806 atonal homolog 1 (Drosophila)                      |
| 71093  | Atnh8   | 0.05  | 0.16  | 0.05  | -0.04 | -0.04 | 0.5404 | 0.4520 | 0.5462 | 0.3863 | 0.3019 atonal homolog 7 (Drosophila)                      |
| 100210 | Atpb1b  | 0.72  | 0.21  | 1.05  | 0.98  | 0.98  | 0.1197 | 0.6231 | 0.5875 | 0.0006 | 0.0006 atonal homolog 8 (Drosophila)                      |
| 68080  | Atpd1c  | 0.02  | 0.46  | 0.38  | 0.11  | 0.39  | 0.6910 | 0.3811 | 0.4479 | 0.3591 | 0.0185 ATP binding domain 1 family, member B              |
| 233189 | Atpd1c  | -0.29 | -0.47 | -0.49 | -0.14 | -0.08 | 0.3523 | 0.0971 | 0.0273 | 0.1913 | 0.2948 ATP binding domain 1 family, member C              |
| 233189 | Atpd1c  | 0.30  | -0.58 | -0.47 | -0.50 | -0.37 | 0.5756 | 0.0072 | 0.0304 | 0.0030 | 0.0035 ATP binding domain 3                               |

|        |        |       |       |       |       |       |        |        |        |        |                                                                                                 |
|--------|--------|-------|-------|-------|-------|-------|--------|--------|--------|--------|-------------------------------------------------------------------------------------------------|
| 66632  | Atpb4  | 0.24  | -0.13 | -0.30 | -0.03 | -0.10 | 0.2125 | 0.2699 | 0.0191 | 0.4777 | 0.2308 ATP binding domain 4                                                                     |
| 66632  | Atpb4  | 0.03  | -0.08 | -0.06 | -0.05 | -0.07 | 0.6367 | 0.2437 | 0.2732 | 0.3716 | 0.2487 ATP binding domain 4                                                                     |
| 66632  | Atpb4  | -0.01 | -0.25 | -0.25 | -0.05 | -0.11 | 0.6961 | 0.4628 | 0.4853 | 0.4981 | 0.3007 ATP binding domain 4                                                                     |
| 104112 | Acyl   | -0.62 | 0.19  | 0.25  | -0.05 | -0.38 | 0.4792 | 0.3403 | 0.3052 | 0.4151 | 0.0857 ATP citrate lyase                                                                        |
| 104112 | Acyl   | 0.05  | 0.01  | 0.12  | -0.04 | -0.04 | 0.5641 | 0.6533 | 0.3963 | 0.4241 | 0.3277 ATP citrate lyase                                                                        |
| 230649 | Atpa1  | 0.33  | 0.27  | 0.55  | 0.51  | 0.82  | 0.3796 | 0.5046 | 0.1065 | 0.0361 | 0.0019 ATP synthase mitochondrial F1 complex assembly factor 1                                  |
| 230649 | Atpa1  | -0.33 | -1.07 | -1.26 | -0.46 | -0.56 | 0.3929 | 0.0062 | 0.0007 | 0.1068 | 0.0191 ATP synthase mitochondrial F1 complex assembly factor 1                                  |
| 230649 | Atpa1  | -0.13 | 0.13  | 0.16  | -0.07 | -0.13 | 0.3990 | 0.2008 | 0.1723 | 0.3602 | 0.1489 ATP synthase mitochondrial F1 complex assembly factor 1                                  |
| 246782 | Atpa2  | 0.37  | 0.29  | 0.55  | 0.67  | 0.76  | 0.1756 | 0.3987 | 0.0471 | 0.0003 | 0.0080 ATP synthase mitochondrial F1 complex assembly factor 2                                  |
| 246782 | Atpa2  | -0.16 | 0.27  | -0.15 | -0.27 | -0.53 | 0.5115 | 0.4097 | 0.3424 | 0.1464 | 0.0080 ATP synthase mitochondrial F1 complex assembly factor 2                                  |
| 11947  | Atpb5  | 0.13  | -0.63 | -0.40 | -0.09 | -0.01 | 0.3618 | 0.0406 | 0.0286 | 0.3430 | 0.4604 ATP synthase, H+ transporting mitochondrial F1 complex, beta subunit                     |
| 11947  | Atpb5  | 0.44  | -0.42 | 0.19  | 0.49  | 0.87  | 0.3840 | 0.1969 | 0.5837 | 0.2081 | 0.0091 ATP synthase, H+ transporting mitochondrial F1 complex, beta subunit                     |
| 11947  | Atpb5  | 0.06  | -0.17 | 0.24  | 0.40  | 0.57  | 0.6681 | 0.4308 | 0.4910 | 0.2982 | 0.0974 ATP synthase, H+ transporting mitochondrial F1 complex, beta subunit                     |
| 11950  | Atpa1  | 0.22  | -0.16 | -0.09 | 0.01  | 0.02  | 0.3937 | 0.2995 | 0.4136 | 0.5526 | 0.4770 ATP synthase, H+ transporting mitochondrial F0 complex, subunit b, isoform 1             |
| 11950  | Atpa1  | -0.04 | 0.37  | 0.27  | 0.11  | 0.14  | 0.6020 | 0.0200 | 0.0102 | 0.2123 | 0.1297 ATP synthase, H+ transporting mitochondrial F0 complex, subunit b, isoform 1             |
| 11951  | Atpa1  | -0.01 | 0.00  | 0.18  | -0.22 | -0.36 | 0.6961 | 0.5704 | 0.4909 | 0.1709 | 0.0075 ATP synthase, H+ transporting mitochondrial F0 complex, subunit b, isoform 1             |
| 67942  | Atpa1  | -0.21 | -0.28 | 0.08  | 0.36  | 0.37  | 0.5912 | 0.1297 | 0.4909 | 0.1522 | 0.0661 ATP synthase, H+ transporting mitochondrial F0 complex, subunit c (subunit 9), isoform 1 |
| 67942  | Atpa2  | -0.03 | -0.43 | 0.04  | -0.45 | -0.46 | 0.5290 | 0.5552 | 0.5550 | 0.2912 | 0.0139 ATP synthase, H+ transporting mitochondrial F0 complex, subunit c (subunit 9), isoform 1 |
| 67942  | Atpa2  | -0.10 | -0.24 | -0.19 | -0.24 | -0.24 | 0.6607 | 0.0300 | 0.1719 | 0.2912 | 0.0282 ATP synthase, H+ transporting mitochondrial F0 complex, subunit c (subunit 9), isoform 2 |
| 228033 | Atpa3  | 0.03  | -0.43 | -0.18 | -0.23 | -0.06 | 0.5692 | 0.1845 | 0.2509 | 0.0983 | 0.3766 ATP synthase, H+ transporting mitochondrial F0 complex, subunit c (subunit 9), isoform 2 |
| 71679  | Atpa1  | 0.45  | -0.42 | -0.76 | -0.32 | -0.35 | 0.2071 | 0.1630 | 0.0253 | 0.0825 | 0.0266 ATP synthase, H+ transporting mitochondrial F0 complex, subunit d                        |
| 71679  | Atpa1  | -0.08 | -0.26 | -0.58 | -0.38 | -0.50 | 0.6455 | 0.6330 | 0.2966 | 0.0738 | 0.0089 ATP synthase, H+ transporting mitochondrial F0 complex, subunit d                        |
| 11957  | Atpa2  | 0.28  | -0.80 | -0.57 | -0.33 | -0.18 | 0.4519 | 0.1022 | 0.0255 | 0.1645 | 0.2793 ATP synthase, H+ transporting mitochondrial F0 complex, subunit F                        |
| 57423  | Atpa2  | -0.75 | -0.06 | -0.28 | -0.46 | -0.82 | 0.3776 | 0.4750 | 0.5541 | 0.0293 | 0.0015 ATP synthase, H+ transporting mitochondrial F0 complex, subunit F                        |
| 72425  | Atpa1  | 0.24  | -0.38 | -0.67 | -0.41 | -0.61 | 0.4240 | 0.2527 | 0.0126 | 0.0162 | 0.0092 ATP synthase, H+ transporting mitochondrial F0 complex, subunit g                        |
| 68055  | Atpa1  | 0.36  | -0.60 | -0.83 | -0.04 | -0.61 | 0.2295 | 0.0116 | 0.0026 | 0.0569 | 0.0002 ATP synthase, H+ transporting mitochondrial F0 complex, subunit s                        |
| 68055  | Atpa1  | 0.03  | 0.05  | -0.04 | -0.04 | 0.00  | 0.6715 | 0.6048 | 0.4909 | 0.4480 | 0.4842 ATP synthase, H+ transporting mitochondrial F0 complex, alpha subunit, isoform 1         |
| 11946  | Atpa1  | -0.13 | 0.09  | -0.01 | -0.10 | -0.23 | 0.6049 | 0.5668 | 0.4576 | 0.3949 | 0.0984 ATP synthase, H+ transporting mitochondrial F1 complex, alpha subunit, isoform 1         |
| 11946  | Atpa1  | -0.03 | -0.24 | 0.19  | 0.27  | 0.42  | 0.6826 | 0.6138 | 0.0929 | 0.2881 | 0.0030 ATP synthase, H+ transporting mitochondrial F1 complex, alpha subunit, isoform 1         |
| 66043  | Atpa5  | -0.45 | 0.21  | 0.22  | -0.15 | -0.60 | 0.2867 | 0.6020 | 0.5810 | 0.2881 | 0.0082 ATP synthase, H+ transporting mitochondrial F1 complex, delta subunit                    |
| 67126  | Atpa1  | 0.14  | -0.24 | -0.61 | -0.55 | -0.99 | 0.5870 | 0.3716 | 0.0519 | 0.2880 | 0.0003 ATP synthase, H+ transporting mitochondrial F1 complex, epsilon subunit                  |
| 11949  | Atpa1  | 0.42  | -0.89 | -0.66 | -0.15 | -0.18 | 0.2515 | 0.0236 | 0.0107 | 0.3548 | 0.2208 ATP synthase, H+ transporting mitochondrial F1 complex, gamma polypeptide 1              |
| 28080  | Atpa5  | -0.90 | -0.35 | -0.28 | -0.33 | -0.54 | 0.3793 | 0.5640 | 0.5224 | 0.1070 | 0.0147 ATP synthase, H+ transporting mitochondrial F1 complex, gamma polypeptide 1              |
| 11958  | Atpa5  | -0.83 | -0.08 | -0.53 | -1.03 | -1.54 | 0.1750 | 0.6205 | 0.3201 | 0.0060 | 0.0002 ATP synthase, H+ transporting mitochondrial F1 complex, O subunit                        |
| 67269  | Atpa1  | 0.12  | 0.11  | 0.17  | 0.02  | 0.12  | 0.5434 | 0.6188 | 0.6041 | 0.5000 | 0.1245 ATP/GTP binding protein 1                                                                |
| 67269  | Atpa1  | -0.14 | 0.10  | -0.14 | -0.56 | -0.72 | 0.5860 | 0.5786 | 0.3064 | 0.0033 | 0.0002 ATP/GTP binding protein 1                                                                |
| 67269  | Atpa1  | 0.04  | 0.00  | -0.11 | -0.03 | -0.03 | 0.5941 | 0.5714 | 0.2005 | 0.5546 | 0.3829 ATP/GTP binding protein 1                                                                |
| 67269  | Atpa1  | 0.00  | 0.08  | -0.03 | -0.01 | 0.00  | 0.6941 | 0.4622 | 0.4869 | 0.5334 | 0.4839 ATP/GTP binding protein 1                                                                |
| 244071 | Atpa1  | -0.04 | 0.01  | 0.01  | -0.04 | -0.07 | 0.6201 | 0.6126 | 0.6358 | 0.4369 | 0.2596 ATP/GTP binding protein-like 1                                                           |
| 271813 | Atpa2  | 0.03  | -0.04 | -0.01 | -0.06 | 0.02  | 0.6759 | 0.6082 | 0.6372 | 0.3904 | 0.4438 ATP/GTP binding protein-like 1                                                           |
| 271813 | Atpa2  | 0.01  | -0.15 | -0.53 | -0.60 | -0.56 | 0.6764 | 0.2935 | 0.6522 | 0.5515 | 0.4938 ATP/GTP binding protein-like 2                                                           |
| 76223  | Atpa3  | -0.43 | 0.05  | 0.02  | -0.21 | -0.18 | 0.2983 | 0.3708 | 0.4003 | 0.1531 | 0.0008 ATP/GTP binding protein-like 2                                                           |
| 76223  | Atpa3  | -0.12 | -0.13 | -0.17 | -0.16 | -0.16 | 0.4147 | 0.5386 | 0.5789 | 0.2244 | 0.0637 ATP/GTP binding protein-like 3                                                           |
| 76223  | Atpa3  | 0.03  | -0.08 | -0.01 | -0.05 | -0.06 | 0.6205 | 0.3713 | 0.6032 | 0.4190 | 0.3123 ATP/GTP binding protein-like 3                                                           |
| 231093 | Atpa5  | 0.33  | -0.27 | -0.22 | 0.10  | -0.09 | 0.3884 | 0.1698 | 0.1882 | 0.3380 | 0.2178 ATP/GTP binding protein-like 5                                                           |
| 66349  | Atpa5  | 0.09  | 0.09  | 0.21  | 0.16  | 0.30  | 0.5645 | 0.6445 | 0.4076 | 0.2438 | 0.0295 ATP/GTP binding protein-like 5                                                           |
| 66349  | Atpa5  | -0.31 | -0.02 | -0.06 | -0.41 | -0.32 | 0.2575 | 0.5831 | 0.4207 | 0.0294 | 0.0454 ATP/S5-like                                                                              |
| 66349  | Atpa5  | 0.04  | -0.50 | -0.40 | 0.07  | 0.00  | 0.6586 | 0.0711 | 0.0776 | 0.4677 | 0.4927 ATP/S5-like                                                                              |
| 67979  | Atpa1  | 0.59  | -0.09 | -0.15 | 0.29  | 0.47  | 0.1350 | 0.3604 | 0.3381 | 0.0638 | 0.0115 ATPase family, AAA domain containing 1                                                   |
| 67979  | Atpa1  | 0.30  | -0.73 | -0.46 | -0.20 | -0.17 | 0.2772 | 0.0051 | 0.0504 | 0.2155 | 0.1590 ATPase family, AAA domain containing 1                                                   |
| 70472  | Atpa2  | 0.24  | -0.59 | -0.80 | -0.63 | -0.69 | 0.3577 | 0.0225 | 0.0067 | 0.0004 | 0.0000 ATPase family, AAA domain containing 2                                                   |
| 70472  | Atpa2  | 0.13  | -0.25 | -0.22 | -0.15 | -0.03 | 0.3697 | 0.1465 | 0.2112 | 0.0595 | 0.3972 ATPase family, AAA domain containing 2                                                   |
| 70472  | Atpa2  | 0.04  | 0.10  | -0.21 | -0.28 | -0.20 | 0.6470 | 0.6554 | 0.1147 | 0.0122 | 0.0408 ATPase family, AAA domain containing 2                                                   |
| 70472  | Atpa2  | -0.02 | 0.12  | -0.02 | -0.10 | -0.07 | 0.6768 | 0.6013 | 0.4995 | 0.1446 | 0.2485 ATPase family, AAA domain containing 2                                                   |
| 320817 | Atpa2b | -0.50 | 0.42  | -0.11 | -0.46 | -0.44 | 0.4033 | 0.1602 | 0.5430 | 0.0940 | 0.0893 ATPase family, AAA domain containing 2B                                                  |
| 320817 | Atpa2b | -0.47 | 1.02  | 0.47  | -0.91 | -0.64 | 0.4699 | 0.1830 | 0.5067 | 0.3399 | 0.0714 ATPase family, AAA domain containing 2B                                                  |
| 108988 | Atpa3a | -0.04 | 0.04  | 0.00  | 0.08  | 0.14  | 0.5976 | 0.5028 | 0.5172 | 0.3564 | 0.1698 ATPase family, AAA domain containing 3A                                                  |
| 217138 | Atpa4  | -0.38 | 0.66  | 0.85  | 0.75  | 1.06  | 0.4735 | 0.0736 | 0.0390 | 0.1171 | 0.4175 ATPase family, AAA domain containing 4                                                   |
| 217138 | Atpa4  | 0.21  | 0.19  | 0.44  | 0.34  | 0.61  | 0.5052 | 0.6160 | 0.4561 | 0.0067 | 0.0001 ATPase family, AAA domain containing 4                                                   |
| 217138 | Atpa4  | -0.50 | 0.16  | 0.17  | -0.08 | -0.08 | 0.2955 | 0.3191 | 0.2458 | 0.4135 | 0.0003 ATPase family, AAA domain containing 4                                                   |
| 237877 | Atpa5  | -0.16 | 0.10  | 0.24  | -0.06 | -0.15 | 0.5330 | 0.5786 | 0.5775 | 0.4241 | 0.3778 ATPase family, AAA domain containing 5                                                   |
| 237877 | Atpa5  | -0.03 | -0.01 | 0.08  | -0.01 | 0.04  | 0.6383 | 0.6142 | 0.5086 | 0.5245 | 0.3896 ATPase family, AAA domain containing 5                                                   |
| 11983  | Atpa1  | -0.78 | 0.49  | 0.13  | -0.43 | -0.55 | 0.1640 | 0.1045 | 0.3283 | 0.0211 | 0.0072 ATPase inhibitory factor 1                                                               |
| 11983  | Atpa1  | -0.57 | 0.02  | -0.34 | -0.71 | -1.14 | 0.1650 | 0.5292 | 0.3813 | 0.0009 | 0.0000 ATPase inhibitory factor 1                                                               |

|        |        |       |       |       |       |       |        |        |        |        |                                                                 |
|--------|--------|-------|-------|-------|-------|-------|--------|--------|--------|--------|-----------------------------------------------------------------|
| 235574 | Abp2c1 | 0.04  | 0.03  | 0.01  | 0.04  | -0.01 | 0.5904 | 0.4933 | 0.5783 | 0.4108 | 0.4510 ATPase, Ca++-sequestering                                |
| 235574 | Abp2c1 | -0.01 | 0.05  | 0.03  | 0.10  | 0.15  | 0.6854 | 0.4577 | 0.5182 | 0.2650 | 0.0981 ATPase, Ca++-sequestering                                |
| 54670  | Abp1b1 | 0.67  | -0.23 | -0.31 | 0.24  | 0.34  | 0.1243 | 0.3787 | 0.2538 | 0.1595 | 0.0385 ATPase, class I, type 8B, member 1                       |
| 54670  | Abp1b1 | 0.09  | -0.03 | 0.01  | 0.04  | 0.06  | 0.4772 | 0.5461 | 0.6271 | 0.4240 | 0.2937 ATPase, class I, type 8B, member 1                       |
| 54670  | Abp1b1 | -0.09 | -0.04 | 0.06  | -0.14 | -0.04 | 0.6333 | 0.6333 | 0.3149 | 0.3396 | 0.4288 ATPase, class I, type 8B, member 1                       |
| 54670  | Abp1b1 | 0.04  | -0.14 | -0.15 | -0.11 | -0.03 | 0.5724 | 0.1630 | 0.1680 | 0.1532 | 0.4032 ATPase, class I, type 8B, member 1                       |
| 54667  | Abp1b2 | 0.39  | 0.42  | 0.19  | 0.38  | 0.26  | 0.3648 | 0.2617 | 0.5919 | 0.2216 | 0.2348 ATPase, class I, type 8B, member 2                       |
| 54667  | Abp1b2 | 0.00  | 0.09  | 0.37  | 0.13  | 0.16  | 0.7006 | 0.6080 | 0.0870 | 0.1642 | 0.0521 ATPase, class I, type 8B, member 2                       |
| 67331  | Abp1b3 | -0.15 | 0.07  | -0.02 | -0.10 | -0.08 | 0.2409 | 0.4623 | 0.5631 | 0.2146 | 0.1943 ATPase, class I, type 8B, member 3                       |
| 67331  | Abp1b3 | -0.03 | -0.04 | -0.02 | -0.09 | -0.09 | 0.6335 | 0.4673 | 0.5085 | 0.2864 | 0.2083 ATPase, class I, type 8B, member 3                       |
| 241633 | Abp1b4 | -0.08 | 0.06  | -0.07 | -0.08 | -0.06 | 0.5011 | 0.4824 | 0.4427 | 0.2927 | 0.3052 ATPase, class I, type 8B, member 4                       |
| 241633 | Abp1b4 | -0.04 | 0.12  | 0.02  | -0.15 | -0.13 | 0.6339 | 0.6245 | 0.4873 | 0.1064 | 0.0006 ATPase, class II, type 9A                                |
| 11981  | Abp1a  | 0.21  | -0.09 | 0.37  | 0.70  | 0.87  | 0.4798 | 0.5190 | 0.3999 | 0.0061 | 0.3483 ATPase, class II, type 9B                                |
| 50771  | Abp1b  | -1.00 | 0.44  | 0.66  | 0.04  | -0.12 | 0.1820 | 0.1698 | 0.0668 | 0.4604 | 0.2484 ATPase, class V, type 10A                                |
| 50771  | Abp1b  | 0.03  | -0.01 | -0.10 | -0.09 | -0.07 | 0.5996 | 0.5693 | 0.1896 | 0.1975 | 0.0664 ATPase, class V, type 10B                                |
| 11982  | Abp1a  | 0.34  | -0.22 | -0.31 | -0.19 | -0.34 | 0.2714 | 0.1907 | 0.0983 | 0.0885 | 0.3032 ATPase, class V, type 10B                                |
| 319767 | Abp1b  | 0.06  | -0.03 | 0.03  | -0.01 | -0.05 | 0.5613 | 0.4805 | 0.4579 | 0.5016 | 0.2968 ATPase, class V, type 10D                                |
| 231287 | Abp1d  | -0.13 | 0.03  | 0.04  | -0.14 | -0.06 | 0.3361 | 0.5116 | 0.3973 | 0.1047 | 0.0000 ATPase, class V, type 10D                                |
| 231287 | Abp1d  | 0.18  | 0.51  | 1.01  | 0.91  | 1.23  | 0.4541 | 0.0357 | 0.0113 | 0.0010 | 0.3525 ATPase, class V, type 10D                                |
| 50770  | Abp11a | -0.21 | 0.01  | 0.62  | -0.03 | 0.18  | 0.5904 | 0.1454 | 0.2764 | 0.5464 | 0.0126 ATPase, class VI, type 11A                               |
| 50770  | Abp11a | 0.12  | 0.67  | 1.46  | 0.31  | 1.90  | 0.2416 | 0.3258 | 0.5474 | 0.0900 | 0.0106 ATPase, class VI, type 11A                               |
| 76295  | Abp11b | 0.38  | -0.42 | -0.04 | 0.34  | 0.42  | 0.2694 | 0.0738 | 0.5020 | 0.1142 | 0.0339 ATPase, class VI, type 11B                               |
| 76295  | Abp11b | 0.03  | 0.08  | 0.22  | 0.05  | 0.17  | 0.6304 | 0.4477 | 0.0571 | 0.3827 | 0.4909 ATPase, class VI, type 11B                               |
| 320940 | Abp11c | -0.02 | -0.01 | -0.02 | 0.03  | 0.00  | 0.6681 | 0.5929 | 0.5949 | 0.4696 | 0.0058 ATPase, class VI, type 11C                               |
| 11977  | Abp7a  | -0.24 | 0.51  | 0.37  | -0.05 | 0.16  | 0.5759 | 0.3777 | 0.2297 | 0.3185 | 0.1301 ATPase, Cu++ transporting, alpha polypeptide             |
| 11977  | Abp7a  | 0.39  | -0.34 | -0.06 | -0.23 | -0.07 | 0.2088 | 0.0368 | 0.0959 | 0.4216 | 0.2850 ATPase, Cu++ transporting, beta polypeptide              |
| 11979  | Abp7b  | 0.08  | -0.27 | 0.05  | 0.23  | 0.02  | 0.6395 | 0.1757 | 0.5048 | 0.1603 | 0.4380 ATPase, Cu++ transporting, lysosomal accessory protein 2 |
| 54411  | Abp1a1 | 0.92  | -0.61 | 0.02  | 0.05  | 0.27  | 0.2626 | 0.3182 | 0.5740 | 0.0823 | 0.0181 ATPase, H+ transporting, lysosomal accessory protein 1   |
| 70495  | Abp1a2 | 0.26  | -0.01 | 0.25  | 0.03  | 0.02  | 0.4080 | 0.5286 | 0.5038 | 0.4980 | 0.4443 ATPase, H+ transporting, lysosomal V0 subunit A1         |
| 11975  | Abp1a1 | -0.72 | 0.05  | 0.50  | 0.18  | -0.19 | 0.2237 | 0.3975 | 0.0879 | 0.3515 | 0.2484 ATPase, H+ transporting, lysosomal V0 subunit A1         |
| 11975  | Abp1a1 | -0.16 | 0.46  | 0.37  | -0.28 | -0.26 | 0.6697 | 0.3185 | 0.4195 | 0.1719 | 0.1130 ATPase, H+ transporting, lysosomal V0 subunit A1         |
| 11975  | Abp1a1 | -0.03 | -0.33 | 0.21  | 0.02  | 0.22  | 0.6831 | 0.6107 | 0.2052 | 0.5316 | 0.1643 ATPase, H+ transporting, lysosomal V0 subunit A1         |
| 21871  | Abp1a2 | 0.24  | -0.06 | 0.02  | 0.20  | 0.38  | 0.1372 | 0.4570 | 0.5883 | 0.0118 | 0.1117 ATPase, H+ transporting, lysosomal V0 subunit A2         |
| 21871  | Abp1a2 | -0.08 | 0.15  | 0.30  | 0.00  | 0.22  | 0.6192 | 0.5883 | 0.3086 | 0.5840 | 0.0022 ATPase, H+ transporting, lysosomal V0 subunit A2         |
| 14094  | Abp1a4 | -0.06 | 0.23  | -0.15 | -0.35 | -0.50 | 0.6470 | 0.5002 | 0.3226 | 0.0179 | 0.0001 ATPase, H+ transporting, lysosomal V0 subunit A4         |
| 14094  | Abp1a4 | 0.18  | 0.19  | 0.85  | 0.35  | 0.99  | 0.2364 | 0.2914 | 0.1195 | 0.5200 | 0.0083 ATPase, H+ transporting, lysosomal V0 subunit A4         |
| 114143 | Abp1a  | -0.04 | 0.93  | 0.78  | 0.04  | 0.53  | 0.6752 | 0.6473 | 0.4833 | 0.0014 | 0.0001 ATPase, H+ transporting, lysosomal V0 subunit B          |
| 114143 | Abp1a  | -0.81 | -0.14 | -0.27 | -0.78 | -1.06 | 0.1287 | 0.2443 | 0.0146 | 0.0007 | 0.0026 ATPase, H+ transporting, lysosomal V0 subunit C          |
| 11984  | Abp1a  | 0.20  | 0.97  | 0.87  | 0.87  | 0.96  | 0.1270 | 0.2443 | 0.0146 | 0.0007 | 0.0721 ATPase, H+ transporting, lysosomal V0 subunit D1         |
| 11972  | Abp1a1 | -0.45 | -0.26 | 0.15  | 0.34  | 0.49  | 0.5518 | 0.5246 | 0.3231 | 0.1168 | 0.0331 ATPase, H+ transporting, lysosomal V0 subunit D2         |
| 242341 | Abp1a2 | 0.37  | -0.37 | -0.26 | 0.06  | 0.20  | 0.0519 | 0.0425 | 0.1746 | 0.4987 | 0.0026 ATPase, H+ transporting, lysosomal V0 subunit E          |
| 11974  | Abp1a  | -0.28 | 0.56  | 0.10  | -0.35 | -0.46 | 0.4490 | 0.3347 | 0.6306 | 0.1410 | 0.3297 ATPase, H+ transporting, lysosomal V0 subunit E          |
| 11974  | Abp1a  | 0.03  | -0.46 | -0.24 | -0.10 | -0.13 | 0.6850 | 0.4945 | 0.6316 | 0.3798 | 0.0051 ATPase, H+ transporting, lysosomal V0 subunit E2         |
| 76252  | Abp1a2 | -0.30 | 0.36  | -0.05 | -0.32 | -0.75 | 0.4288 | 0.4649 | 0.4717 | 0.1032 | 0.2793 ATPase, H+ transporting, lysosomal V0 subunit E2         |
| 76252  | Abp1a2 | -0.08 | -0.14 | -0.12 | -0.03 | -0.15 | 0.6198 | 0.3255 | 0.3752 | 0.5179 | 0.0071 ATPase, H+ transporting, lysosomal V0 subunit E2         |
| 11964  | Abp1a  | 0.68  | -0.30 | -0.07 | 0.47  | 0.76  | 0.1653 | 0.3099 | 0.5161 | 0.0469 | 0.3505 ATPase, H+ transporting, lysosomal V1 subunit A          |
| 11964  | Abp1a  | 0.22  | -0.24 | -0.20 | -0.03 | 0.10  | 0.3969 | 0.4236 | 0.4839 | 0.5230 | 0.0801 ATPase, H+ transporting, lysosomal V1 subunit A          |
| 110835 | Abp1b1 | 0.04  | 0.28  | -0.02 | -0.13 | -0.17 | 0.6515 | 0.2142 | 0.5121 | 0.1562 | 0.0045 ATPase, H+ transporting, lysosomal V1 subunit B1         |
| 11966  | Abp1b2 | 0.09  | -0.03 | 0.10  | -0.23 | -0.51 | 0.5590 | 0.4861 | 0.6262 | 0.1104 | 0.2351 ATPase, H+ transporting, lysosomal V1 subunit B2         |
| 66335  | Abp1c1 | 0.51  | -0.45 | -0.38 | 0.06  | 0.15  | 0.1654 | 0.0773 | 0.1488 | 0.4654 | 0.0048 ATPase, H+ transporting, lysosomal V1 subunit C1         |
| 88775  | Abp1c2 | 0.17  | -0.16 | -0.63 | 0.03  | -0.50 | 0.5181 | 0.2315 | 0.0139 | 0.5009 | 0.0039 ATPase, H+ transporting, lysosomal V1 subunit C2         |
| 73834  | Abp1d  | 0.49  | -0.47 | -0.61 | -0.23 | -0.36 | 0.1206 | 0.0304 | 0.0052 | 0.0876 | 0.4228 ATPase, H+ transporting, lysosomal V1 subunit D          |
| 74915  | Abp1e2 | 0.18  | 0.12  | 0.12  | 0.14  | -0.03 | 0.5374 | 0.5410 | 0.5289 | 0.1461 | 0.2803 ATPase, H+ transporting, lysosomal V1 subunit E          |
| 66144  | Abp1f1 | 0.65  | -0.43 | -0.56 | -0.12 | 0.21  | 0.2237 | 0.0684 | 0.0211 | 0.4653 | 0.0600 ATPase, H+ transporting, lysosomal V1 subunit F          |
| 66144  | Abp1f1 | 0.32  | -0.37 | -0.58 | -0.30 | -0.56 | 0.3778 | 0.1374 | 0.0632 | 0.0538 | 0.0973 ATPase, H+ transporting, lysosomal V1 subunit F          |
| 66290  | Abp1g1 | 0.74  | -0.56 | -0.67 | -0.04 | 0.16  | 0.0702 | 0.0503 | 0.0107 | 0.4855 | 0.0008 ATPase, H+ transporting, lysosomal V1 subunit G1         |
| 66290  | Abp1g1 | 0.10  | 0.68  | 0.69  | 0.58  | 0.89  | 0.5827 | 0.0079 | 0.0131 | 0.1143 | 0.0008 ATPase, H+ transporting, lysosomal V1 subunit G1         |
| 66237  | Abp1g2 | -0.09 | 0.09  | 0.24  | 0.10  | 0.11  | 0.4694 | 0.3778 | 0.3950 | 0.2116 | 0.1306 ATPase, H+ transporting, lysosomal V1 subunit G2         |
| 338375 | Abp1g2 | 0.27  | 0.00  | 0.17  | 0.11  | -0.10 | 0.4953 | 0.4155 | 0.5566 | 0.2810 | 0.2185 ATPase, H+ transporting, lysosomal V1 subunit G2         |
| 338375 | Abp1g3 | 0.03  | 0.09  | -0.16 | -0.08 | -0.18 | 0.6391 | 0.4385 | 0.1041 | 0.2842 | 0.0560 ATPase, H+ transporting, lysosomal V1 subunit G3         |
| 108664 | Abp1h  | 0.31  | 0.06  | 0.33  | 0.17  | 0.58  | 0.3444 | 0.2972 | 0.4396 | 0.2242 | 0.0031 ATPase, H+ transporting, lysosomal V1 subunit H          |
| 108664 | Abp1h  | -0.11 | 0.17  | 0.11  | -0.16 | -0.11 | 0.6754 | 0.2972 | 0.4396 | 0.1574 | 0.0908 ATPase, H+ transporting, lysosomal V1 subunit H          |
| 108664 | Abp1h  | -0.24 | 0.18  | 0.27  | -0.06 | 0.25  | 0.3954 | 0.1779 | 0.2955 | 0.4992 | 0.2307 ATPase, H+ transporting, lysosomal V1 subunit H          |
| 11945  | Alpha  | 0.06  | 0.15  | 0.09  | -0.07 | -0.06 | 0.5075 | 0.6545 | 0.5689 | 0.4569 | 0.3067 ATPase, H+/K+ exchanging, beta polypeptide               |
| 11944  | Alpha  | 0.07  | -0.04 | -0.05 | -0.01 | 0.08  | 0.6282 | 0.6431 | 0.5503 | 0.3668 | 0.2053 ATPase, H+/K+ exchanging, gastric, alpha polypeptide     |
| 11944  | Alpha  | 0.08  | 0.07  | 0.14  | 0.11  | 0.02  | 0.4815 | 0.4372 | 0.3592 | 0.5341 | 0.4361 ATPase, H+/K+ exchanging, nongastric, alpha polypeptide  |
| 192113 | Abp1a  | 0.05  | 0.05  | 0.00  | 0.06  | 0.04  | 0.5530 | 0.6065 | 0.5    |        |                                                                 |

|         |       |       |        |       |       |        |        |        |        |                                                                 |
|---------|-------|-------|--------|-------|-------|--------|--------|--------|--------|-----------------------------------------------------------------|
| Abca17  | 1.30  | 0.04  | -0.48  | 0.04  | -0.04 | 0.0003 | 0.6330 | 0.0071 | 0.5016 | 0.3676 ATP-binding cassette, sub-family A (ABC1), member 17     |
| Abca2   | 0.48  | -0.63 | -0.06  | 0.51  | 0.62  | 0.0444 | 0.1001 | 0.4953 | 0.1051 | 0.0116 ATP-binding cassette, sub-family A (ABC1), member 2      |
| Abca2   | 0.28  | -0.45 | 0.13   | 0.55  | -0.77 | 0.4629 | 0.1801 | 0.6052 | 0.0873 | 0.0079 ATP-binding cassette, sub-family A (ABC1), member 3      |
| Abca3   | 0.61  | -0.48 | 0.06   | 0.23  | 0.15  | 0.1084 | 0.5982 | 0.3847 | 0.3689 | 0.2998 ATP-binding cassette, sub-family A (ABC1), member 3      |
| Abca3   | 0.71  | -0.35 | -0.03  | 0.85  | 0.82  | 0.1266 | 0.3725 | 0.0016 | 0.0008 | 0.0008 ATP-binding cassette, sub-family A (ABC1), member 3      |
| Abca3   | 0.17  | -0.12 | -0.26  | -0.14 | -0.16 | 0.4946 | 0.3233 | 0.1920 | 0.0550 | 0.0550 ATP-binding cassette, sub-family A (ABC1), member 3      |
| Abca4   | -0.01 | 0.00  | 0.03   | 0.04  | 0.04  | 0.6664 | 0.6361 | 0.3558 | 0.0068 | 0.0068 ATP-binding cassette, sub-family A (ABC1), member 3      |
| Abca4   | -0.08 | 0.04  | 0.21   | 0.23  | 0.46  | 0.4822 | 0.5263 | 0.2328 | 0.0006 | 0.0006 ATP-binding cassette, sub-family A (ABC1), member 4      |
| Abca5   | 0.12  | -0.10 | 0.00   | 0.05  | 0.10  | 0.4095 | 0.2308 | 0.3744 | 0.1818 | 0.1818 ATP-binding cassette, sub-family A (ABC1), member 5      |
| Abca5   | 0.19  | -0.09 | -0.02  | -0.13 | 0.08  | 0.4444 | 0.3232 | 0.3935 | 0.2352 | 0.2352 ATP-binding cassette, sub-family A (ABC1), member 5      |
| Abca5   | 0.07  | 0.03  | -0.05  | 0.03  | 0.03  | 0.4868 | 0.5631 | 0.4831 | 0.2355 | 0.2355 ATP-binding cassette, sub-family A (ABC1), member 5      |
| Abca5   | 0.13  | -0.36 | -0.09  | 0.14  | -0.01 | 0.5306 | 0.1493 | 0.4275 | 0.4723 | 0.4723 ATP-binding cassette, sub-family A (ABC1), member 5      |
| Abca5   | 0.05  | 0.20  | 0.14   | -0.14 | -0.04 | 0.6585 | 0.5199 | 0.3689 | 0.4453 | 0.4453 ATP-binding cassette, sub-family A (ABC1), member 5      |
| Abca6   | 0.37  | 0.18  | 0.38   | 0.90  | 1.06  | 0.3790 | 0.5968 | 0.3847 | 0.0000 | 0.0000 ATP-binding cassette, sub-family A (ABC1), member 6      |
| Abca6   | 0.12  | -0.13 | -0.07  | 0.09  | 0.12  | 0.4363 | 0.3816 | 0.5160 | 0.4305 | 0.4305 ATP-binding cassette, sub-family A (ABC1), member 6      |
| Abca7   | -0.12 | 0.00  | 0.01   | -0.19 | -0.14 | 0.4190 | 0.6095 | 0.5472 | 0.1092 | 0.1092 ATP-binding cassette, sub-family A (ABC1), member 7      |
| Abca7   | -0.24 | 0.73  | 0.23   | -0.14 | -0.26 | 0.4919 | 0.1174 | 0.5836 | 0.1315 | 0.1315 ATP-binding cassette, sub-family A (ABC1), member 7      |
| Abca8a  | 0.39  | -0.75 | -0.01  | 0.46  | 0.77  | 0.3775 | 0.1174 | 0.5634 | 0.1002 | 0.1002 ATP-binding cassette, sub-family A (ABC1), member 8      |
| Abca8b  | 0.36  | -0.11 | -0.14  | 0.10  | 0.21  | 0.3404 | 0.3330 | 0.2633 | 0.3962 | 0.3962 ATP-binding cassette, sub-family A (ABC1), member 8      |
| Abca8b  | -0.09 | 0.00  | -0.05  | -0.02 | -0.06 | 0.4640 | 0.6445 | 0.4649 | 0.3366 | 0.3366 ATP-binding cassette, sub-family A (ABC1), member 8      |
| Abca9   | -0.10 | -0.01 | 0.06   | -0.07 | -0.14 | 0.4941 | 0.6191 | 0.5140 | 0.1721 | 0.1721 ATP-binding cassette, sub-family A (ABC1), member 9      |
| Abca9   | -0.06 | 0.03  | 0.01   | -0.04 | -0.05 | 0.5604 | 0.6412 | 0.6205 | 0.2892 | 0.2892 ATP-binding cassette, sub-family A (ABC1), member 9      |
| Abca9   | -0.13 | -0.25 | -0.23  | -0.24 | -0.37 | 0.5873 | 0.6259 | 0.6338 | 0.0882 | 0.0882 ATP-binding cassette, sub-family A (ABC1), member 9      |
| Abca9   | -0.04 | 0.00  | 0.13   | -0.01 | -0.04 | 0.6178 | 0.5492 | 0.5433 | 0.3569 | 0.3569 ATP-binding cassette, sub-family A (ABC1), member 9      |
| Abcd10  | -0.50 | 1.07  | 0.24   | -0.33 | -0.50 | 0.3560 | 0.0843 | 0.6055 | 0.0580 | 0.0580 ATP-binding cassette, sub-family B (MDR/TAP), member 10  |
| Abcd10  | -0.07 | 0.01  | 0.05   | 0.26  | 0.09  | 0.6532 | 0.4066 | 0.3529 | 0.2050 | 0.2050 ATP-binding cassette, sub-family B (MDR/TAP), member 10  |
| Abcd11  | 0.20  | -0.14 | -0.24  | 0.39  | 0.32  | 0.4136 | 0.3909 | 0.1974 | 0.0774 | 0.0774 ATP-binding cassette, sub-family B (MDR/TAP), member 11  |
| Abcd11a | 0.35  | -0.44 | -0.15  | 0.31  | 0.40  | 0.1399 | 0.0133 | 0.1730 | 0.0004 | 0.0004 ATP-binding cassette, sub-family B (MDR/TAP), member 11a |
| Abcd1b  | 0.33  | -0.16 | 0.20   | 0.55  | 0.84  | 0.6272 | 0.3855 | 0.4671 | 0.1031 | 0.1031 ATP-binding cassette, sub-family B (MDR/TAP), member 11b |
| Abcd1b  | -0.02 | 0.04  | 0.13   | 0.25  | 0.04  | 0.6450 | 0.5501 | 0.5010 | 0.1032 | 0.1032 ATP-binding cassette, sub-family B (MDR/TAP), member 11b |
| Abcd1b  | 0.06  | 0.27  | 0.30   | 0.51  | 0.80  | 0.5038 | 0.5816 | 0.5558 | 0.5429 | 0.5429 ATP-binding cassette, sub-family B (MDR/TAP), member 11b |
| Abcd4   | 0.07  | 0.01  | 0.12   | 0.58  | 0.01  | 0.6803 | 0.3912 | 0.5881 | 0.0085 | 0.0085 ATP-binding cassette, sub-family B (MDR/TAP), member 12  |
| Abcd5   | -0.02 | -0.13 | 0.02   | 0.12  | 0.60  | 0.6490 | 0.4952 | 0.6333 | 0.4850 | 0.4850 ATP-binding cassette, sub-family B (MDR/TAP), member 12  |
| Abcd6   | -0.02 | 0.07  | 0.03   | 0.02  | 0.02  | 0.2572 | 0.3037 | 0.5372 | 0.0494 | 0.0494 ATP-binding cassette, sub-family B (MDR/TAP), member 13  |
| Abcd7   | -0.35 | 0.37  | -0.09  | -0.15 | -0.07 | 0.4766 | 0.3536 | 0.3256 | 0.0927 | 0.0927 ATP-binding cassette, sub-family B (MDR/TAP), member 14  |
| Abcd7   | -0.19 | 0.09  | 0.09   | -0.15 | -0.07 | 0.5616 | 0.5127 | 0.6121 | 0.2884 | 0.2884 ATP-binding cassette, sub-family B (MDR/TAP), member 14  |
| Abcd7   | -0.06 | -0.32 | -0.24  | -0.10 | -0.03 | 0.6551 | 0.5474 | 0.6136 | 0.4618 | 0.4618 ATP-binding cassette, sub-family B (MDR/TAP), member 14  |
| Abcd8   | 0.62  | -0.10 | 0.08   | 0.27  | 0.16  | 0.1207 | 0.0473 | 0.6018 | 0.2010 | 0.2010 ATP-binding cassette, sub-family B (MDR/TAP), member 15  |
| Abcd8   | 0.08  | -0.04 | -0.10  | 0.08  | 0.27  | 0.4524 | 0.5905 | 0.3767 | 0.5222 | 0.5222 ATP-binding cassette, sub-family B (MDR/TAP), member 15  |
| Abcd9   | -0.25 | 0.32  | -0.38  | -0.47 | -0.65 | 0.4677 | 0.3948 | 0.1075 | 0.0896 | 0.0896 ATP-binding cassette, sub-family B (MDR/TAP), member 16  |
| Abcd9   | -0.38 | 0.20  | 0.50   | 0.42  | 0.80  | 0.2762 | 0.5889 | 0.2355 | 0.0159 | 0.0159 ATP-binding cassette, sub-family B (MDR/TAP), member 16  |
| Abcd1   | 0.38  | 0.20  | 0.50   | 0.42  | 0.80  | 0.2762 | 0.5889 | 0.2355 | 0.0159 | 0.0159 ATP-binding cassette, sub-family B (MDR/TAP), member 16  |
| Abcd1   | -0.83 | 1.06  | 0.92   | 1.12  | -0.20 | 0.2811 | 0.4970 | 0.0297 | 0.2779 | 0.2779 ATP-binding cassette, sub-family B (MDR/TAP), member 17  |
| Abcd1   | -0.30 | 0.97  | 0.92   | -0.32 | -0.06 | 0.4752 | 0.4962 | 0.4302 | 0.0929 | 0.0929 ATP-binding cassette, sub-family B (MDR/TAP), member 17  |
| Abcd10  | 0.09  | -0.06 | -0.03  | 0.09  | -0.05 | 0.4534 | 0.4952 | 0.4304 | 0.4011 | 0.4011 ATP-binding cassette, sub-family B (MDR/TAP), member 18  |
| Abcd12  | -0.06 | -0.03 | 0.09   | -0.05 | 0.03  | 0.5109 | 0.4534 | 0.4304 | 0.4011 | 0.4011 ATP-binding cassette, sub-family B (MDR/TAP), member 18  |
| Abcd2   | -0.05 | 0.19  | -0.03  | 0.04  | 0.05  | 0.5901 | 0.2136 | 0.5740 | 0.4424 | 0.4424 ATP-binding cassette, sub-family B (MDR/TAP), member 19  |
| Abcd2   | 0.05  | 0.00  | -0.05  | 0.04  | 0.01  | 0.5766 | 0.6515 | 0.5455 | 0.4569 | 0.4569 ATP-binding cassette, sub-family B (MDR/TAP), member 19  |
| Abcd3   | 0.42  | -0.08 | 0.07   | 0.16  | 0.14  | 0.1997 | 0.3984 | 0.5718 | 0.2619 | 0.2619 ATP-binding cassette, sub-family B (MDR/TAP), member 20  |
| Abcd3   | 0.44  | -0.08 | 0.07   | 0.16  | 0.14  | 0.1997 | 0.3984 | 0.5718 | 0.2619 | 0.2619 ATP-binding cassette, sub-family B (MDR/TAP), member 20  |
| Abcd4   | -0.01 | 0.02  | -0.01  | -0.19 | -0.20 | 0.6928 | 0.4845 | 0.4189 | 0.0854 | 0.0854 ATP-binding cassette, sub-family B (MDR/TAP), member 21  |
| Abcd4   | 0.13  | 0.45  | 0.46   | 0.21  | 0.30  | 0.3128 | 0.1541 | 0.1263 | 0.1314 | 0.1314 ATP-binding cassette, sub-family B (MDR/TAP), member 21  |
| Abcd5   | -0.34 | 0.24  | 0.13   | -0.11 | -0.31 | 0.5070 | 0.5259 | 0.6342 | 0.2766 | 0.2766 ATP-binding cassette, sub-family B (MDR/TAP), member 22  |
| Abcd5   | 0.17  | -0.15 | 0.00   | 0.04  | 0.11  | 0.4223 | 0.2351 | 0.3213 | 0.4215 | 0.4215 ATP-binding cassette, sub-family B (MDR/TAP), member 22  |
| Abcd5   | 0.02  | -0.09 | -0.18  | -0.30 | -0.07 | 0.7034 | 0.4548 | 0.2593 | 0.0622 | 0.0622 ATP-binding cassette, sub-family B (MDR/TAP), member 22  |
| Abcd6   | 0.02  | 0.00  | 0.00   | 0.02  | 0.05  | 0.6500 | 0.5895 | 0.5766 | 0.4944 | 0.4944 ATP-binding cassette, sub-family B (MDR/TAP), member 22  |
| Abcd8   | -0.36 | 0.27  | -0.18  | 0.39  | 0.06  | 0.4506 | 0.2033 | 0.5692 | 0.1802 | 0.1802 ATP-binding cassette, sub-family B (MDR/TAP), member 23  |
| Abcd8   | 0.05  | 0.02  | -0.02  | -0.08 | -0.05 | 0.6053 | 0.5348 | 0.4295 | 0.2839 | 0.2839 ATP-binding cassette, sub-family B (MDR/TAP), member 23  |
| Abcd9   | 0.40  | -0.29 | 0.04   | 0.30  | 0.26  | 0.1095 | 0.0449 | 0.4263 | 0.0825 | 0.0825 ATP-binding cassette, sub-family B (MDR/TAP), member 23  |
| Abcd9   | 0.06  | -0.06 | 0.04   | 0.03  | 0.12  | 0.5507 | 0.4530 | 0.5659 | 0.4478 | 0.4478 ATP-binding cassette, sub-family B (MDR/TAP), member 23  |
| Abcd9   | 0.05  | -0.14 | -0.05  | 0.04  | 0.03  | 0.5771 | 0.3663 | 0.6413 | 0.3389 | 0.3389 ATP-binding cassette, sub-family B (MDR/TAP), member 23  |
| Abcd1   | -0.10 | 0.01  | -0.02  | -0.01 | -0.10 | 0.4494 | 0.5796 | 0.3659 | 0.0673 | 0.0673 ATP-binding cassette, sub-family B (MDR/TAP), member 24  |
| Abcd2   | 0.12  | -0.45 | -0.17  | 0.06  | -0.28 | 0.5185 | 0.0214 | 0.2732 | 0.4637 | 0.4637 ATP-binding cassette, sub-family B (MDR/TAP), member 24  |
| Abcd2   | -0.40 | -0.26 | -0.21  | -0.66 | -0.74 | 0.0405 | 0.0785 | 0.2605 | 0.0000 | 0.0000 ATP-binding cassette, sub-family B (MDR/TAP), member 24  |
| Abcd3   | 0.11  | -0.50 | -0.45  | -0.20 | -0.33 | 0.4892 | 0.1615 | 0.0305 | 0.1362 | 0.1362 ATP-binding cassette, sub-family B (MDR/TAP), member 25  |
| Abcd3   | 0.81  | -0.81 | -0.80  | 0.22  | 0.38  | 0.0361 | 0.0161 | 0.0033 | 0.1974 | 0.1974 ATP-binding cassette, sub-family B (MDR/TAP), member 25  |
| Abcd3   | 0.15  | 0.10  | 0.01   | 0.09  | 0.10  | 0.3156 | 0.2539 | 0.5453 | 0.2307 | 0.2307 ATP-binding cassette, sub-family B (MDR/TAP), member 25  |
| Abcd3   | 0.07  | 0.05  | 0.09   | 0.10  | 0.24  | 0.5926 | 0.3445 | 0.3039 | 0.0883 | 0.0883 ATP-binding cassette, sub-family B (MDR/TAP), member 25  |
| Abcd4   | -0.18 | 0.57  | 0.27   | -0.24 | 0.20  | 0.5094 | 0.1947 | 0.5583 | 0.0078 | 0.0078 ATP-binding cassette, sub-family B (MDR/TAP), member 26  |
| Abcd4   | 0.73  | -0.76 | 0.26   | -0.20 | 0.58  | 0.1270 | 0.0113 | 0.2154 | 0.3438 | 0.3438 ATP-binding cassette, sub-family B (MDR/TAP), member 26  |
| Abcd1   | -0.49 | 0.35  | 0.16   | -0.52 | -0.48 | 0.2851 | 0.2850 | 0.3547 | 0.0180 | 0.0180 ATP-binding cassette, sub-family B (MDR/TAP), member 27  |
| Abcd1   | -0.33 | 0.31  | 0.04   | -0.21 | -0.41 | 0.1871 | 0.6326 | 0.4021 | 0.0883 | 0.0883 ATP-binding cassette, sub-family B (MDR/TAP), member 27  |
| Abcd2   | 0.20  | 0.48  | 0.80   | 0.74  | 0.95  | 0.4742 | 0.2657 | 0.0402 | 0.0021 | 0.0021 ATP-binding cassette, sub-family B (MDR/TAP), member 28  |
| Abcd2   | -0.25 | -0.07 | 0.01   | 0.11  | 0.10  | 0.2966 | 0.6294 | 0.5138 | 0.1480 | 0.1480 ATP-binding cassette, sub-family B (MDR/TAP), member 28  |
| Abcd2   | 0.01  | -0.05 | 0.05   | 0.18  | 0.09  | 0.6985 | 0.4938 | 0.5984 | 0.0002 | 0.0002 ATP-binding cassette, sub-family B (MDR/TAP), member 28  |
| Abcd3   | -0.38 | 0.64  | -0.24  | -0.53 | -0.57 | 0.4580 | 0.3872 | 0.2197 | 0.0682 | 0.0682 ATP-binding cassette, sub-family B (MDR/TAP), member 28  |
| Abcd3   | -0.07 | 0.02  | -0.35  | -0.27 | -0.73 | 0.5610 | 0.6087 | 0.0228 | 0.0038 | 0.0038 ATP-binding cassette, sub-family B (MDR/TAP), member 28  |
| Abcd3   | -0.56 | -0.66 | -1.50  | -0.97 | -1.68 | 0.5134 | 0.6466 | 0.2958 | 0.0002 | 0.0002 ATP-binding cassette, sub-family B (MDR/TAP), member 28  |
| Abcd1   | 0.61  | -0.55 | -0.42  | 0.27  | 0.86  | 0.1172 | 0.1151 | 0.1006 | 0.5624 | 0.5624 ATP-binding cassette, sub-family B (MDR/TAP), member 29  |
| Abcd2   | -0.01 | -0.36 | -0.28  | 0.04  | 0.25  | 0.6903 | 0.1874 | 0.1874 | 0.2308 | 0.2308 ATP-binding cassette, sub-family B (MDR/TAP), member 29  |
| Abcd3   | -0.09 | -0.22 | -0.10  | -0.22 | -0.10 | 0.5099 | 0.3790 | 0.5876 | 0.5032 | 0.5032 ATP-binding cassette, sub-family B (MDR/TAP), member 29  |
| Abcd3   | 0.03  | 0.01  | -0.02  | 0.02  | 0.09  | 0.6242 | 0.5412 | 0.5876 | 0.4156 | 0.4156 ATP-binding cassette, sub-family B (MDR/TAP), member 29  |
| Abcd4   | 0.01  | 0.08  | 0.00   | -0.04 | 0.13  | 0.6886 | 0.4760 | 0.6408 | 0.4362 | 0.4362 ATP-binding cassette, sub-family B (MDR/TAP), member 29  |
| Abcd5   | -0.07 | 0.10  | -0.02  | -0.04 | 0.03  | 0.4954 | 0.2434 | 0.6099 | 0.3829 | 0.3829 ATP-binding cassette, sub-family B (MDR/TAP), member 29  |
| Abcd8   | 0.07  | -0.06 | -0.10  | -0.05 | -0.04 | 0.5434 | 0.3214 | 0.2113 | 0.4181 | 0.4181 ATP-binding cassette, sub-family B (MDR/TAP), member 29  |
| Abcd1   | 0.29  | 0.00  | -0.03  | 0.35  | 0.22  | 0.5151 | 0.6186 | 0.5376 | 0.1828 | 0.1828 ATP-binding cassette, sub-family B (MDR/TAP), member 29  |
| Abcd1   | 0.07  | -0.23 | -0.07  | -0.05 | 0.05  | 0.5094 | 0.4223 | 0.3827 | 0.3922 | 0.3922 ATP-binding cassette, sub-family B (MDR/TAP), member 29  |
| Abcd1   | -0.05 | 0.04  | -0.11  | -0.23 | -0.03 | 0.6515 | 0.5646 | 0.3204 | 0.0797 | 0.0797 ATP-binding cassette, sub-family B (MDR/TAP), member 29  |
| Abcd1   | -0.02 | -0.13 | 0.05</ |       |       |        |        |        |        |                                                                 |

|        |          |       |       |       |       |       |        |        |        |        |                                                                                              |
|--------|----------|-------|-------|-------|-------|-------|--------|--------|--------|--------|----------------------------------------------------------------------------------------------|
| 11927  | Atox1    | 0.05  | -0.22 | -0.34 | -0.53 | -0.57 | 0.6763 | 0.2765 | 0.1409 | 0.0750 | 0.0320 ATX1 (antioxidant protein 1) homolog 1 (yeast)                                        |
| 11992  | Auh      | 0.26  | -0.02 | -0.22 | 0.04  | -0.20 | 0.2149 | 0.4020 | 0.0635 | 0.4614 | 0.0509 AU RNA binding protein/enoyl-coenzyme A hydratase                                     |
| 11992  | Auh      | 0.27  | 0.13  | -0.07 | -0.11 | -0.38 | 0.4274 | 0.6228 | 0.4865 | 0.3337 | 0.0242 AU RNA binding protein/enoyl-coenzyme A hydratase                                     |
| 20978  | Aurka    | 0.02  | -0.42 | -0.39 | -0.43 | -0.27 | 0.6925 | 0.2481 | 0.2411 | 0.0283 | 0.1068 aurora kinase A                                                                       |
| 60077  | Aurkaip1 | -0.51 | 0.19  | -0.20 | -0.34 | -0.68 | 0.4211 | 0.5521 | 0.3214 | 0.0521 | 0.0005 aurora kinase A interacting protein 1                                                 |
| 20877  | Aurkb    | 0.16  | -0.25 | -0.05 | 0.09  | 0.10  | 0.3762 | 0.2083 | 0.6324 | 0.2601 | 0.1419 aurora kinase B                                                                       |
| 20871  | Aurkc    | -0.06 | 0.04  | 0.09  | 0.04  | 0.01  | 0.5351 | 0.5822 | 0.3926 | 0.4579 | 0.4657 aurora kinase C                                                                       |
| 319974 | Auts2    | -0.13 | 0.10  | 0.12  | -0.11 | -0.06 | 0.4474 | 0.3954 | 0.3035 | 0.2333 | 0.3190 autism susceptibility candidate 2                                                     |
| 319974 | Auts2    | 0.25  | 0.64  | 0.68  | 0.48  | 0.64  | 0.4478 | 0.1831 | 0.1711 | 0.0440 | 0.0069 autism susceptibility candidate 2                                                     |
| 319974 | Auts2    | -0.05 | 0.15  | 0.28  | 0.03  | -0.35 | 0.5550 | 0.2321 | 0.1006 | 0.0102 | 0.0125 autism susceptibility candidate 2                                                     |
| 319974 | Auts2    | 0.04  | -0.07 | -0.07 | -0.06 | -0.06 | 0.6215 | 0.4155 | 0.3760 | 0.3602 | 0.3001 autism susceptibility candidate 2                                                     |
| 23802  | Anfr     | 0.05  | 0.16  | 0.33  | 0.05  | 0.20  | 0.5005 | 0.3671 | 0.2675 | 0.5210 | 0.2538 autocrine motility factor receptor                                                    |
| 73983  | Aire     | 0.04  | -0.04 | -0.03 | -0.15 | 0.16  | 0.5911 | 0.5660 | 0.1780 | 0.0948 | 0.2597 autoimmune regulator (autoimmune polyendocrinopathy candidiasis ectodermal dystrophy) |
| 228361 | Ambr1    | -0.48 | -0.52 | -0.90 | -0.56 | -1.06 | 0.4725 | 0.6342 | 0.4090 | 0.0013 | 0.0000 autophagy-related 16-like 2 (S. cerevisiae)                                           |
| 228361 | Ambr1    | 0.33  | 0.30  | 0.38  | 0.24  | 0.18  | 0.3579 | 0.5731 | 0.0912 | 0.1321 | 0.1432 autophagy/beam 1 regulator 1                                                          |
| 66795  | Ambr1    | 0.12  | 0.15  | 0.03  | 0.06  | 0.25  | 0.5109 | 0.6342 | 0.0425 | 0.3116 | 0.0739 autophagy/beam 1 regulator 1                                                          |
| 66795  | Ambr1    | 0.50  | -0.47 | -0.50 | 0.17  | 0.25  | 0.2579 | 0.0779 | 0.0944 | 0.3193 | 0.0816 autophagy-related 10 (yeast)                                                          |
| 66795  | Ambr1    | -0.23 | -0.59 | -0.87 | -0.46 | -0.49 | 0.3111 | 0.2628 | 0.0944 | 0.3193 | 0.0481 autophagy-related 10 (yeast)                                                          |
| 67526  | Ag10     | 0.23  | -0.59 | -0.87 | -0.46 | -0.49 | 0.3111 | 0.2628 | 0.0944 | 0.3193 | 0.0027 autophagy-related 12 (yeast)                                                          |
| 67526  | Ag12     | -0.27 | -0.06 | -0.27 | -0.19 | -0.72 | 0.5176 | 0.6216 | 0.2781 | 0.0110 | 0.0192 autophagy-related 12 (yeast)                                                          |
| 77040  | Ag16i1   | -0.28 | -0.11 | -0.03 | -0.53 | -0.43 | 0.6832 | 0.4367 | 0.1235 | 0.0432 | 0.0635 autophagy-related 12 (yeast)                                                          |
| 77040  | Ag16i1   | -0.01 | 0.03  | 0.03  | -0.05 | -0.00 | 0.3884 | 0.4210 | 0.4005 | 0.0063 | 0.0046 autophagy-related 16-like 1 (yeast)                                                   |
| 67941  | Ag3      | 0.16  | -0.02 | -0.03 | 0.00  | -0.10 | 0.6903 | 0.5014 | 0.5095 | 0.3430 | 0.1380 autophagy-related 3 (yeast)                                                           |
| 67941  | Ag3      | 0.13  | -0.04 | 0.02  | -0.07 | -0.08 | 0.2113 | 0.5690 | 0.4969 | 0.5525 | 0.2425 autophagy-related 3 (yeast)                                                           |
| 67941  | Ag3      | 0.10  | -0.03 | -0.13 | 0.03  | -0.02 | 0.3726 | 0.2048 | 0.6218 | 0.3146 | 0.2004 autophagy-related 3 (yeast)                                                           |
| 67941  | Ag3      | 0.29  | -0.44 | -0.35 | 0.09  | 0.50  | 0.4623 | 0.4528 | 0.4717 | 0.4631 | 0.4411 autophagy-related 3 (yeast)                                                           |
| 67941  | Ag3      | 0.15  | -0.10 | -0.23 | 0.03  | -0.02 | 0.4725 | 0.6144 | 0.3136 | 0.3884 | 0.2451 autophagy-related 3 (yeast)                                                           |
| 67941  | Ag3      | -0.08 | -0.09 | -0.11 | -0.20 | -0.05 | 0.5410 | 0.5540 | 0.4265 | 0.0913 | 0.3814 autophagy-related 3 (yeast)                                                           |
| 67941  | Ag3      | 0.08  | -0.10 | -0.12 | -0.03 | -0.00 | 0.4694 | 0.4694 | 0.4984 | 0.3950 | 0.4825 autophagy-related 3 (yeast)                                                           |
| 67941  | Ag3      | 0.06  | -0.05 | -0.06 | -0.06 | -0.16 | 0.5759 | 0.6340 | 0.3658 | 0.3950 | 0.0767 autophagy-related 3 (yeast)                                                           |
| 67941  | Ag3      | 0.04  | -0.13 | -0.22 | -0.14 | -0.10 | 0.6358 | 0.4625 | 0.2207 | 0.1651 | 0.1728 autophagy-related 3 (yeast)                                                           |
| 67941  | Ag3      | -0.02 | -0.01 | -0.16 | -0.01 | -0.16 | 0.6787 | 0.5140 | 0.4886 | 0.2092 | 0.0988 autophagy-related 3 (yeast)                                                           |
| 67941  | Ag3      | 0.00  | 0.10  | -0.01 | -0.05 | -0.05 | 0.7032 | 0.3347 | 0.5336 | 0.4501 | 0.3907 autophagy-related 3 (yeast)                                                           |
| 666468 | Alga4    | 0.60  | -0.40 | -0.54 | -0.08 | -0.06 | 0.0807 | 0.0512 | 0.0116 | 0.3480 | 0.3298 autophagy-related 4A (yeast)                                                          |
| 66615  | Alga4    | 0.27  | 0.47  | 0.54  | 0.21  | 0.58  | 0.4389 | 0.3640 | 0.2083 | 0.1454 | 0.0007 autophagy-related 4B (yeast)                                                          |
| 66615  | Alga4    | 0.07  | -0.29 | -0.07 | 0.18  | 0.38  | 0.6180 | 0.4006 | 0.6147 | 0.2735 | 0.0141 autophagy-related 4B (yeast)                                                          |
| 242557 | Alga4    | 0.29  | -0.16 | -0.20 | 0.22  | 0.15  | 0.2237 | 0.1967 | 0.1120 | 0.0712 | 0.1083 autophagy-related 4C (yeast)                                                          |
| 242557 | Alga4    | 0.32  | -0.33 | -0.58 | -0.72 | -0.87 | 0.3655 | 0.5070 | 0.1655 | 0.0002 | 0.0000 autophagy-related 4C (yeast)                                                          |
| 242557 | Alga4    | 0.11  | 0.02  | 0.02  | 0.04  | 0.07  | 0.4713 | 0.4297 | 0.3780 | 0.4280 | 0.2121 autophagy-related 4C (yeast)                                                          |
| 235040 | Alga4    | 0.95  | -0.05 | -0.11 | -0.07 | -0.12 | 0.2699 | 0.3834 | 0.2881 | 0.4539 | 0.2359 autophagy-related 4D (yeast)                                                          |
| 235040 | Alga4    | -0.14 | 0.14  | 0.09  | 0.16  | -0.01 | 0.3518 | 0.1806 | 0.2975 | 0.2010 | 0.4658 autophagy-related 4D (yeast)                                                          |
| 235040 | Alga4    | -0.35 | -0.31 | -0.30 | 0.00  | 0.03  | 0.4240 | 0.6147 | 0.6037 | 0.5589 | 0.4387 autophagy-related 4D (yeast)                                                          |
| 11793  | Ag5      | -0.16 | 0.16  | 0.15  | 0.12  | 0.21  | 0.6219 | 0.3270 | 0.3034 | 0.2980 | 0.4387 autophagy-related 4D (yeast)                                                          |
| 74244  | Ag7      | -0.34 | 0.46  | 0.16  | 0.11  | 0.21  | 0.2108 | 0.1454 | 0.6059 | 0.2579 | 0.1695 autophagy-related 5 (yeast)                                                           |
| 74244  | Ag7      | 0.10  | 0.10  | 0.12  | 0.10  | 0.01  | 0.5569 | 0.6192 | 0.5970 | 0.3320 | 0.4624 autophagy-related 7 (yeast)                                                           |
| 13876  | Erg      | -0.29 | 0.88  | -0.08 | -0.90 | -0.98 | 0.5365 | 0.1968 | 0.4464 | 0.0275 | 0.0093 avian erythroblastosis virus E-26 (v-ets) oncogene related                            |
| 17132  | Mar      | -0.69 | -0.01 | 0.44  | -0.66 | -1.22 | 0.2633 | 0.5316 | 0.5699 | 0.0239 | 0.0028 avian musculoaponeurotic fibrosarcoma (v-maf) AS42 oncogene homolog                   |
| 17132  | Mar      | -0.23 | -0.04 | -0.13 | 0.04  | -0.09 | 0.4350 | 0.5508 | 0.6305 | 0.5037 | 0.3146 avian musculoaponeurotic fibrosarcoma (v-maf) AS42 oncogene homolog                   |
| 17132  | Mar      | -0.08 | 0.14  | 0.09  | -0.31 | -0.20 | 0.5266 | 0.4780 | 0.5649 | 0.0434 | 0.0542 avian musculoaponeurotic fibrosarcoma (v-maf) AS42 oncogene homolog                   |
| 17132  | Mar      | -0.02 | -0.02 | -0.82 | -0.65 | -0.76 | 0.5825 | 0.4811 | 0.0658 | 0.1137 | 0.0125 avian musculoaponeurotic fibrosarcoma (v-maf) AS42 oncogene homolog                   |
| 19998  | Relb     | 0.30  | 0.34  | 0.74  | 0.67  | 0.83  | 0.3819 | 0.4815 | 0.0839 | 0.0087 | 0.0000 avian reticuloendotheliosis viral (v-rel) oncogene related B                          |
| 12005  | Axin1    | 0.26  | 0.63  | 1.07  | 1.01  | 1.28  | 0.3124 | 0.1197 | 0.0049 | 0.0000 | 0.0000 axin1                                                                                 |
| 215418 | Axud1    | -1.37 | 3.31  | 3.46  | 2.10  | 2.23  | 0.0341 | 0.0002 | 0.0001 | 0.0000 | 0.0000 AXIN1 up-regulated 1                                                                  |
| 215418 | Axud1    | 0.18  | 0.17  | 0.32  | 0.38  | 0.38  | 0.4629 | 0.6425 | 0.4471 | 0.0215 | 0.0042 AXIN1 up-regulated 1                                                                  |
| 215418 | Axud1    | 0.02  | 2.32  | 2.95  | 1.94  | 2.16  | 0.6959 | 0.0082 | 0.0010 | 0.0000 | 0.0000 AXIN1 up-regulated 1                                                                  |
| 12006  | Axin2    | -0.12 | 0.12  | 0.25  | -0.13 | -0.04 | 0.5757 | 0.6379 | 0.4434 | 0.0822 | 0.1293 AXL receptor tyrosine kinase                                                          |
| 26362  | Axl      | -0.24 | -0.39 | 0.22  | 0.27  | 0.26  | 0.5940 | 0.6246 | 0.2704 | 0.0822 | 0.1355 B and T lymphocyte associated                                                         |
| 208154 | Bla      | -0.59 | -0.06 | -0.06 | 0.27  | 0.19  | 0.5940 | 0.6246 | 0.2704 | 0.0822 | 0.2860 B double prime 1, subunit of RNA polymerase III transcription initiation factor IIB   |
| 544871 | Bdp1     | -0.28 | 0.55  | 0.47  | -0.46 | -0.14 | 0.2681 | 0.3745 | 0.4554 | 0.0889 | 0.0021 B double prime 1, subunit of RNA polymerase III transcription initiation factor IIB   |
| 544971 | Bdp1     | 0.07  | -0.61 | -0.36 | -0.45 | -0.58 | 0.6211 | 0.0134 | 0.1210 | 0.0239 | 0.0021 B double prime 1, subunit of RNA polymerase III transcription initiation factor IIB   |
| 544971 | Bdp1     | -0.02 | 0.08  | -0.06 | -0.81 | -0.63 | 0.6918 | 0.5557 | 0.4203 | 0.0151 | 0.0010 B double prime 1, subunit of RNA polymerase III transcription initiation factor IIB   |
| 12143  | Blk      | -0.07 | -0.05 | -0.21 | -0.08 | -0.17 | 0.5215 | 0.5474 | 0.0397 | 0.3140 | 0.0532 B lymphoid kinase                                                                     |
| 27078  | Bnol1    | -0.31 | -0.70 | -1.07 | -0.76 | -1.34 | 0.5579 | 0.5211 | 0.2862 | 0.0017 | 0.0001 B9 protein domain 1                                                                   |
| 232987 | Bnol2    | -0.21 | 0.46  | -0.14 | -0.61 | -0.52 | 0.5883 | 0.4340 | 0.3857 | 0.1170 | 0.1241 B9 protein domain 2                                                                   |
| 329547 | Bpl      | -0.21 | 0.16  | 0.05  | -0.03 | 0.03  | 0.6103 | 0.2608 | 0.0521 | 0.4595 | 0.3848 bactericidal permeability-increasing protein                                          |
| 66557  | Bpl1     | -0.02 | -0.08 | 0.08  | 0.01  | 0.03  | 0.6595 | 0.3888 | 0.4725 | 0.5396 | 0.3952 bactericidal/permeability-increasing protein-like 1                                   |
| 270757 | Bpl2     | 0.02  | -0.10 | -0.03 | -0.04 | -0.04 | 0.6549 | 0.4292 | 0.6090 | 0.4096 | 0.3709 bactericidal/permeability-increasing protein-like 2                                   |
| 228796 | Bpl3     | 0.06  | -0.05 | 0.09  | 0.22  | 0.18  | 0.5349 | 0.4434 | 0.3747 | 0.0725 | 0.0231 bactericidal/permeability-increasing protein-like 3                                   |
| 17952  | Birc1f   | 0.06  | -0.09 | -0.16 | 0.01  | 0.01  | 0.5645 | 0.6077 | 0.4268 | 0.5474 | 0.4570 baculoviral IAP repeat-containing 1f                                                  |
| 17952  | Birc1f   | 0.07  | 0.07  | 0.06  | 0.06  | 0.05  | 0.7024 | 0.7024 | 0.3987 | 0.3423 | 0.3106 baculoviral IAP repeat-containing 1f                                                  |
| 11797  | Birc2    | 0.13  | 0.51  | 0.41  | 0.19  | 0.07  | 0.5506 | 0.2249 | 0.1682 | 0.1862 | 0.3874 baculoviral IAP repeat-containing 2                                                   |
| 11796  | Birc3    | -0.55 | 0.89  | 1.15  | 0.27  | 0.32  | 0.1770 | 0.0024 | 0.0041 | 0.0598 | 0.0179 baculoviral IAP repeat-containing 3                                                   |
| 11796  | Birc3    | -0.41 | 1.06  | 1.51  | 1.09  | 1.12  | 0.4477 | 0.0211 | 0.0041 | 0.0004 | 0.0000 baculoviral IAP repeat-containing 3                                                   |
| 11799  | Birc5    | -0.73 | 0.69  | 1.01  | 0.07  | 0.14  | 0.3887 | 0.1878 | 0.0637 | 0.5004 | 0.3482 baculoviral IAP repeat-containing 5                                                   |
| 12211  | Birc6    | 0.21  | 0.43  | 0.00  | -0.05 | -0.14 | 0.5112 | 0.3861 | 0.4986 | 0.4841 | 0.3112 baculoviral IAP repeat-containing 6                                                   |
| 269515 | Bahcc1   | 0.16  | 0.03  | 0.06  | 0.15  | 0.05  | 0.4374 | 0.4832 | 0.5384 | 0.0543 | 0.2765 baculoviral IAP repeat-containing 7 (vlin)                                            |
| 66988  | Balp21   | -0.13 | 0.12  | -0.33 | -0.18 | -0.23 | 0.5433 | 0.4378 | 0.0647 | 0.2529 | 0.1382 BAH domain and coiled-coil containing 1                                               |
| 66988  | Balp21   | 0.36  | 0.27  | 0.38  | 0.26  | 0.41  | 0.2226 | 0.4920 | 0.3515 | 0.0648 | 0.0010 BAI1-associated protein 2-like 1                                                      |
| 207495 | Balp22   | 0.03  | -0.42 | 0.12  | 0.43  | 0.46  | 0.6895 | 0.5378 | 0.3595 | 0.1710 | 0.0078 BAI1-associated protein 2-like 1                                                      |
| 545192 | Balp3    | 0.01  | 0.02  |       |       |       |        |        |        |        |                                                                                              |

|         |         |       |       |       |       |       |        |        |        |        |                                                                        |
|---------|---------|-------|-------|-------|-------|-------|--------|--------|--------|--------|------------------------------------------------------------------------|
| 72669   | Bbs5    | -0.02 | -0.40 | -0.87 | -0.75 | -0.87 | 0.6888 | 0.1841 | 0.0139 | 0.0076 | 0.0009 Bardet-Bied syndrome 5 (human)                                  |
| 71492   | Bbs7    | -0.15 | 0.08  | 0.06  | -0.15 | -0.18 | 0.2212 | 0.3586 | 0.4174 | 0.0217 | 0.0215 Bardet-Bied syndrome 7                                          |
| 319845  | Bbs7    | 0.08  | -0.23 | -0.05 | -0.02 | 0.34  | 0.5104 | 0.1159 | 0.4596 | 0.3258 | 0.3258 Bardet-Bied syndrome 7                                          |
| 319845  | Bbs9    | 0.39  | -0.06 | -0.16 | 0.10  | 0.35  | 0.2967 | 0.3831 | 0.5249 | 0.0076 | 0.0076 Bardet-Bied syndrome 9                                          |
| 54422   | Bbs9    | -0.05 | 0.09  | 0.03  | -0.02 | 0.02  | 0.6047 | 0.5566 | 0.3978 | 0.5241 | 0.4168 Bardet-Bied syndrome 9                                          |
| 54422   | Barh1   | 0.07  | -0.07 | -0.03 | 0.00  | 0.02  | 0.5269 | 0.4871 | 0.5972 | 0.5643 | 0.4425 Barh-like 1 (Drosophila)                                        |
| 54422   | Barh1   | -0.02 | -0.06 | 0.37  | 0.00  | -0.44 | 0.6958 | 0.3851 | 0.6091 | 0.5566 | 0.0085 Barh-like 1 (Drosophila)                                        |
| 104382  | Barh2   | 0.10  | -0.09 | -0.05 | 0.07  | 0.02  | 0.5723 | 0.2996 | 0.3581 | 0.4096 | 0.4655 Barh-like 2 (Drosophila)                                        |
| 104382  | Barh2   | -0.02 | 0.01  | 0.03  | 0.01  | 0.01  | 0.6674 | 0.5773 | 0.5476 | 0.5059 | 0.4653 Barh-like 2 (Drosophila)                                        |
| 12022   | Barx1   | 0.11  | -0.08 | -0.14 | 0.02  | 0.01  | 0.3765 | 0.3691 | 0.2027 | 0.4795 | 0.4669 Barh-like homeobox 1                                            |
| 12023   | Barx2   | -0.84 | -0.55 | -0.48 | -1.17 | -1.17 | 0.3173 | 0.4379 | 0.5602 | 0.2707 | 0.0012 Barh-like homeobox 2                                            |
| 12023   | Barx2   | 0.21  | -0.38 | -0.23 | -0.23 | -0.33 | 0.4278 | 0.0306 | 0.2158 | 0.2001 | 0.0317 Barh-like homeobox 2                                            |
| 12023   | Barx2   | 0.00  | -0.16 | -0.14 | -0.15 | -0.20 | 0.7019 | 0.5172 | 0.5476 | 0.2421 | 0.0736 Barh-like homeobox 2                                            |
| 23925   | Barf1   | 0.35  | 0.19  | -0.28 | 0.16  | -0.10 | 0.2466 | 0.4636 | 0.1685 | 0.2646 | 0.1782 barrier to autonegation factor 2                                |
| 403171  | Barf2   | 0.19  | -0.03 | 0.04  | 0.00  | -0.13 | 0.5213 | 0.3954 | 0.5479 | 0.5605 | 0.0930 Barf syndrome, infantile, with sensorineural deafness (Barthin) |
| 140475  | Barf2   | 0.22  | 0.12  | 0.16  | 0.10  | 0.12  | 0.5255 | 0.5326 | 0.5512 | 0.2825 | 0.0072 basal cell adhesion molecule                                    |
| 57278   | Bcam    | -0.65 | -0.08 | 0.43  | 0.55  | -0.52 | 0.4774 | 0.4412 | 0.2122 | 0.0049 | 0.3506 basic helix-loop-helix domain containing, class B, 8            |
| 17341   | Bhlhb6  | -0.17 | 0.12  | 0.14  | 0.08  | -0.05 | 0.2882 | 0.2033 | 0.1533 | 0.2914 | 0.0077 basic helix-loop-helix domain containing, class B, 8            |
| 20893   | Bhlhb2  | 0.16  | 0.17  | 0.44  | 0.33  | 0.54  | 0.5768 | 0.2731 | 0.0812 | 0.0363 | 0.0034 basic helix-loop-helix domain containing, class B2              |
| 79362   | Bhlhb3  | 0.19  | 0.23  | 0.10  | 0.06  | 0.02  | 0.4478 | 0.4821 | 0.0235 | 0.0016 | 0.0034 basic helix-loop-helix domain containing, class B2              |
| 79362   | Bhlhb3  | 0.00  | 0.05  | 0.02  | -0.09 | -0.02 | 0.6940 | 0.6300 | 0.6024 | 0.1707 | 0.4516 basic helix-loop-helix domain containing, class B3              |
| 140489  | Bhlhb4  | 0.04  | -0.80 | 0.04  | 0.03  | 0.01  | 0.5848 | 0.4102 | 0.4965 | 0.4149 | 0.4053 basic helix-loop-helix domain containing, class B3              |
| 59058   | Bhlhb5  | 0.09  | 0.01  | -0.10 | 0.04  | 0.07  | 0.6241 | 0.1889 | 0.1889 | 0.4016 | 0.4766 basic helix-loop-helix domain containing, class B4              |
| 59058   | Bhlhb5  | -0.03 | 0.12  | 0.06  | 0.02  | 0.10  | 0.6249 | 0.2938 | 0.5312 | 0.5089 | 0.2160 basic helix-loop-helix domain containing, class B5              |
| 70237   | Bhlhb9  | -0.31 | -0.40 | -0.35 | 0.14  | 0.32  | 0.2732 | 0.0763 | 0.0753 | 0.2841 | 0.1965 basic helix-loop-helix domain containing, class B5              |
| 66882   | Bzw1    | 0.61  | 0.08  | 0.32  | 0.22  | 0.52  | 0.1350 | 0.5968 | 0.4320 | 0.1300 | 0.0444 basic helix-loop-helix domain containing, class B9              |
| 66882   | Bzw1    | 0.25  | 0.00  | 0.62  | 0.47  | 0.84  | 0.2237 | 0.5968 | 0.0108 | 0.0019 | 0.0003 basic leucine zipper and W2 domains 1                           |
| 66882   | Bzw1    | 0.39  | 0.06  | 0.34  | 0.46  | 0.55  | 0.3295 | 0.5014 | 0.5237 | 0.0061 | 0.0004 basic leucine zipper and W2 domains 1                           |
| 66882   | Bzw1    | 0.12  | 0.14  | 0.32  | -0.04 | 0.37  | 0.5614 | 0.6467 | 0.4465 | 0.4774 | 0.0039 basic leucine zipper and W2 domains 1                           |
| 66912   | Bzw2    | 0.03  | 0.07  | 0.12  | 0.06  | 0.14  | 0.6182 | 0.3809 | 0.2435 | 0.2703 | 0.0476 basic leucine zipper and W2 domains 2                           |
| 66912   | Bzw2    | -0.10 | 0.04  | 0.42  | -0.07 | 0.26  | 0.6325 | 0.5089 | 0.4422 | 0.4552 | 0.1917 basic leucine zipper and W2 domains 2                           |
| 66352   | Bzf1    | 0.32  | -0.23 | -0.07 | 0.16  | 0.42  | 0.7028 | 0.6221 | 0.3188 | 0.0737 | 0.0006 basic leucine zipper and W2 domains 2                           |
| 66352   | Bzf1    | 0.04  | -0.39 | -0.03 | -0.07 | 0.24  | 0.1006 | 0.0959 | 0.4806 | 0.3552 | 0.0484 basic leucine zipper nuclear factor 1                           |
| 66352   | Bzf1    | 0.44  | -0.18 | 0.18  | 0.09  | 0.70  | 0.1962 | 0.0646 | 0.4861 | 0.1965 | 0.0007 basic leucine zipper nuclear factor 1                           |
| 53314   | Batf    | 0.07  | 0.53  | 0.51  | 0.27  | 0.50  | 0.5678 | 0.5208 | 0.4584 | 0.2386 | 0.0295 basic leucine zipper transcription factor, ATF-like 2           |
| 74481   | Batf2   | -1.42 | -0.22 | -0.38 | -1.14 | -1.45 | 0.4856 | 0.3111 | 0.3032 | 0.1880 | 0.0297 basic leucine zipper transcription factor, ATF-like 2           |
| 381319  | Batf3   | -0.28 | 0.16  | -0.33 | -0.46 | -0.67 | 0.0853 | 0.5791 | 0.6325 | 0.0003 | 0.0000 basic leucine zipper transcription factor, ATF-like 2           |
| 218490  | Bf1     | 0.26  | 0.18  | 0.09  | 0.12  | 0.09  | 0.4813 | 0.6273 | 0.2283 | 0.0179 | 0.0042 basic leucine zipper transcription factor, ATF-like 3           |
| 218490  | Bf3     | 0.19  | 0.42  | 0.12  | 0.04  | 0.08  | 0.4884 | 0.3160 | 0.3172 | 0.3549 | 0.1971 basic transcription factor 3                                    |
| 70533   | Bf3b4   | 0.39  | -0.06 | 0.24  | 0.56  | 0.32  | 0.2699 | 0.3688 | 0.5689 | 0.5009 | 0.3282 basic transcription factor 3                                    |
| 70533   | Bf3b4   | 0.02  | -0.20 | -0.25 | -0.35 | -0.46 | 0.6853 | 0.3068 | 0.5788 | 0.0037 | 0.1531 basic transcription factor 3-like 4                             |
| 246229  | Bf3b4   | 0.61  | -0.55 | -0.82 | -0.25 | -0.44 | 0.0597 | 0.0310 | 0.0028 | 0.0471 | 0.0015 basic transcription factor 3-like 4                             |
| 246229  | Bf3b4   | 0.02  | 0.00  | 0.04  | -0.07 | -0.06 | 0.6578 | 0.4990 | 0.5920 | 0.3075 | 0.0020 basic, immunoglobulin-like variable motif containing            |
| 12215   | Bsg     | 0.26  | 0.06  | 0.24  | 0.28  | 0.40  | 0.4267 | 0.4382 | 0.4224 | 0.2558 | 0.2675 basic, immunoglobulin-like variable motif containing            |
| 12173   | Bnc1    | -0.12 | -0.39 | -0.34 | -0.21 | -0.21 | 0.4103 | 0.0170 | 0.0193 | 0.0914 | 0.0716 basigin                                                         |
| 242509  | Bnc2    | -0.09 | 0.15  | 0.08  | 0.20  | 0.06  | 0.1286 | 0.2962 | 0.1841 | 0.3362 | 0.0316 basoonucln 1                                                    |
| 12217   | Bsn     | 0.22  | -0.07 | -0.04 | 0.07  | 0.00  | 0.4520 | 0.3228 | 0.3516 | 0.3719 | 0.4857 bassoon                                                         |
| 12217   | Bsn     | 0.06  | -0.01 | 0.04  | 0.06  | 0.06  | 0.5187 | 0.5246 | 0.6412 | 0.3280 | 0.2749 bassoon                                                         |
| 226562  | Bat2d   | 0.47  | 0.15  | 0.44  | 0.39  | 0.70  | 0.1677 | 0.6069 | 0.1436 | 0.0170 | 0.0007 BAT2 domain containing 1                                        |
| 226562  | Bat2d   | -0.61 | 0.27  | 0.39  | 0.24  | 0.32  | 0.3054 | 0.2834 | 0.1493 | 0.2806 | 0.0839 BAT2 domain containing 1                                        |
| 226562  | Bat2d   | -0.25 | 0.52  | 0.32  | -0.37 | -0.40 | 0.4200 | 0.2033 | 0.4100 | 0.0328 | 0.0286 BAT2 domain containing 1                                        |
| 226562  | Bat2d   | 0.04  | -0.16 | 0.03  | -0.09 | 0.02  | 0.6478 | 0.1801 | 0.5730 | 0.3928 | 0.4661 BAT2 domain containing 1                                        |
| 192120  | Bspry   | 0.27  | 0.19  | 0.20  | 0.04  | 0.23  | 0.3230 | 0.5983 | 0.4872 | 0.4879 | 0.0799 B-box and SPRY domain containing                                |
| Bcdm3d  | Bcdm3d  | -0.21 | -0.09 | -0.73 | -0.75 | -1.26 | 0.4401 | 0.4726 | 0.0204 | 0.0004 | 0.0000 BCDm3 domain containing                                         |
| Bcdm3d  | Bcdm3d  | -0.61 | -0.74 | -0.95 | -1.27 | -1.30 | 0.1506 | 0.0094 | 0.0035 | 0.0019 | 0.0001 B-cell CLL/lymphoma 11A (zinc finger protein)                   |
| 14025   | Bcd11a  | -0.18 | -0.13 | -0.53 | -0.93 | -1.17 | 0.5340 | 0.3616 | 0.0362 | 0.0019 | 0.0001 B-cell CLL/lymphoma 11A (zinc finger protein)                   |
| 14025   | Bcd11a  | -0.09 | -0.34 | -0.46 | -0.59 | -0.62 | 0.5830 | 0.1535 | 0.0531 | 0.0008 | 0.0011 B-cell CLL/lymphoma 11A (zinc finger protein)                   |
| 12029   | Bcd1b   | -0.35 | -0.87 | -1.11 | -1.01 | -1.62 | 0.3820 | 0.0169 | 0.0021 | 0.0014 | 0.0000 B-cell CLL/lymphoma 6, member B                                 |
| 77045   | Bcd1b   | 0.06  | 0.02  | -0.47 | -0.37 | -0.24 | 0.6417 | 0.5310 | 0.0602 | 0.0020 | 0.1531 B-cell CLL/lymphoma 7A                                          |
| 12054   | Bcd1b   | 0.63  | 0.32  | 0.47  | 0.85  | 0.82  | 0.1519 | 0.4335 | 0.2323 | 0.0005 | 0.0000 B-cell CLL/lymphoma 7B                                          |
| 12055   | Bcd1b   | -0.68 | 0.62  | 0.32  | -0.34 | -0.45 | 0.0569 | 0.0547 | 0.1454 | 0.0971 | 0.0000 B-cell CLL/lymphoma 7B                                          |
| 12055   | Bcd1b   | -0.51 | 0.60  | 0.21  | -0.20 | -0.43 | 0.2796 | 0.1126 | 0.3474 | 0.3419 | 0.0212 B-cell CLL/lymphoma 7C                                          |
| 12055   | Bcd1b   | -0.49 | 0.75  | 0.49  | 0.02  | -0.28 | 0.3038 | 0.1531 | 0.2554 | 0.5370 | 0.0638 B-cell CLL/lymphoma 7C                                          |
| 12055   | Bcd1b   | 0.02  | 0.46  | 0.10  | 0.02  | 0.07  | 0.6927 | 0.3947 | 0.5649 | 0.5464 | 0.1416 B-cell CLL/lymphoma 7C                                          |
| 77578   | Bcd9    | 0.12  | -0.40 | -0.29 | -0.22 | -0.33 | 0.5396 | 0.0591 | 0.1167 | 0.1466 | 0.3783 B-cell CLL/lymphoma 7C                                          |
| 77578   | Bcd9    | -0.15 | 0.06  | -0.42 | -0.59 | -0.57 | 0.5708 | 0.5331 | 0.0476 | 0.0152 | 0.0181 B-cell CLL/lymphoma 9                                           |
| 77578   | Bcd9    | 0.01  | -0.01 | -0.01 | 0.01  | 0.00  | 0.6663 | 0.4063 | 0.5887 | 0.5485 | 0.0109 B-cell CLL/lymphoma 9                                           |
| 80288   | Bcd9    | -0.56 | 0.50  | 0.22  | -0.66 | -1.00 | 0.2919 | 0.6031 | 0.6318 | 0.0307 | 0.4831 B-cell CLL/lymphoma 9                                           |
| 12042   | Bcd10   | 0.52  | 0.04  | 0.45  | 0.47  | 0.67  | 0.1516 | 0.6175 | 0.1529 | 0.0283 | 0.0025 B-cell CLL/lymphoma 9-like                                      |
| 12042   | Bcd10   | 0.10  | 0.93  | 0.60  | 0.31  | 0.43  | 0.6382 | 0.1525 | 0.3702 | 0.2868 | 0.0084 B-cell CLL/lymphoma 10                                          |
| 58208   | Bcd11b  | -0.60 | 0.41  | 0.30  | -0.03 | -0.16 | 0.1632 | 0.0771 | 0.1151 | 0.4998 | 0.0584 B-cell CLL/lymphoma 10                                          |
| 58208   | Bcd11b  | -0.25 | 0.25  | 0.25  | -0.21 | -0.30 | 0.4820 | 0.2507 | 0.6290 | 0.5015 | 0.1285 B-cell CLL/lymphoma 11B                                         |
| 12043   | Bcd2    | -0.38 | 0.90  | 0.62  | 0.26  | 0.06  | 0.0946 | 0.0270 | 0.0181 | 0.0582 | 0.0662 B-cell CLL/lymphoma 11B                                         |
| 12043   | Bcd2    | 0.24  | -0.50 | -0.28 | -0.10 | -0.18 | 0.2402 | 0.0225 | 0.0626 | 0.4017 | 0.4723 B-cell CLL/lymphoma 2                                           |
| 12043   | Bcd2    | 0.27  | 0.06  | -0.17 | -0.32 | -0.33 | 0.3222 | 0.3642 | 0.5577 | 0.0643 | 0.1592 B-cell CLL/lymphoma 2                                           |
| 12043   | Bcd2    | -0.47 | 0.06  | -0.15 | 0.03  | 0.02  | 0.3831 | 0.2220 | 0.3846 | 0.5155 | 0.0279 B-cell CLL/lymphoma 2                                           |
| 12043   | Bcd2    | 0.16  | -0.39 | -0.13 | -0.04 | -0.19 | 0.4306 | 0.0567 | 0.2956 | 0.5062 | 0.4538 B-cell CLL/lymphoma 2                                           |
| 12043   | Bcd2    | -0.55 | -0.36 | 0.06  | -0.52 | -0.16 | 0.4601 | 0.5932 | 0.3534 | 0.5340 | 0.1999 B-cell CLL/lymphoma 2                                           |
| 12043   | Bcd2    | 0.11  | -0.34 | -0.12 | -0.06 | -0.12 | 0.5128 | 0.0992 | 0.2724 | 0.4435 | 0.2831 B-cell CLL/lymphoma 2                                           |
| 12043   | Bcd2    | -0.37 | -0.38 | -0.08 | -0.03 | -0.16 | 0.5257 | 0.6266 | 0.4450 | 0.5184 | 0.3351 B-cell CLL/lymphoma 2                                           |
| 12043   | Bcd2    | -0.14 | -0.42 | -0.18 | 0.06  | -0.14 | 0.5481 | 0.6298 | 0.4717 | 0.4758 | 0.3509 B-cell CLL/lymphoma 2                                           |
| 12043   | Bcd2    | -0.34 | -0.42 | -0.18 | 0.06  | -0.14 | 0.5961 | 0.5713 | 0.5618 | 0.5522 | 0.3187 B-cell CLL/lymphoma 2                                           |
| 12043   | Bcd2    | -0.27 | -0.07 | -0.07 | -0.02 | -0.14 | 0.6501 | 0.1842 | 0.4473 | 0.5302 | 0.2746 B-cell CLL/lymphoma 2                                           |
| 12043   | Bcd2    | 0.05  | -0.27 | -0.13 | -0.06 | -0.32 | 0.6968 | 0.1781 | 0.4473 | 0.5302 | 0.0913 B-cell CLL/lymphoma 2                                           |
| 12045   | Bcd2a1b | 0.01  | -0.39 | -0.10 | -0.06 | -0.14 | 0.7311 | 0.1256 | 0.4558 | 0.4806 | 0.0746 B-cell CLL/lymphoma 2 related protein A1b                       |
| 12046   | Bcd2a1b | 0.26  | -0.20 | -0.38 | -0.23 | -0.55 | 0.4174 | 0.0299 | 0.0537 | 0.3946 | 0.0076 B-cell CLL/lymphoma 2 related protein A1b                       |
| 12051   | Bcd3    | 0.10  | 1.21  | 2.15  | 1.39  | 1.83  | 0.1184 | 0.0299 | 0.0017 | 0.0000 | 0.3571 B-cell CLL/lymphoma 2 related protein A1c                       |
| 12053   | Bcd6    | 0.49  | -0.86 | -0.56 | -0.13 | -0.17 | 0.5947 | 0.0098 | 0.0563 | 0.4008 | 0.0000 B-cell CLL/lymphoma 3                                           |
| 17060   | Blnk    | -0.19 | -0.30 | -0.76 | -0.40 | -0.30 | 0.2267 | 0.0098 | 0.0563 | 0.4008 | 0.2590 B-cell CLL/lymphoma 6                                           |
| Bcapp29 | Bcapp29 | 0.62  | -0.54 | -0.50 | 0.08  | 0.35  | 0.2890 | 0.1008 | 0.0362 | 0.0248 | 0.0142 B-cell linker                                                   |
| Bcapp29 | Bcapp29 |       |       |       |       |       |        |        |        |        | 0.1376 B-cell receptor-associated protein 29                           |

|          |         |       |       |       |       |       |        |        |        |        |                                                                   |
|----------|---------|-------|-------|-------|-------|-------|--------|--------|--------|--------|-------------------------------------------------------------------|
| 27061    | Bcap31  | 0.32  | -0.29 | -0.35 | -0.06 | -0.09 | 0.3113 | 0.1493 | 0.0749 | 0.3883 | 0.2458 B-cell receptor-associated protein 31                      |
| 242248   | Bank1   | 0.14  | -0.42 | -1.40 | -0.27 | -0.82 | 0.4640 | 0.0881 | 0.0000 | 0.0970 | 0.0003 B-cell scaffold protein with ankyrin repeats 1             |
| 242248   | Bank1   | 0.05  | -0.02 | -0.24 | -0.04 | -0.02 | 0.5825 | 0.5113 | 0.5184 | 0.4363 | 0.4300 B-cell scaffold protein with ankyrin repeats 1             |
| 242248   | Bank1   | 0.02  | -0.10 | -0.02 | -0.08 | -0.13 | 0.6644 | 0.5944 | 0.2210 | 0.3183 | 0.1254 B-cell scaffold protein with ankyrin repeats 1             |
| 122226   | Btg1    | 0.82  | 0.03  | 0.44  | 0.87  | 1.37  | 0.0515 | 0.6003 | 0.3724 | 0.0034 | 0.0000 B-cell translocation gene 1, anti-proliferative            |
| 122226   | Btg1    | 0.95  | 0.04  | -0.32 | -0.23 | -0.20 | 0.3764 | 0.5641 | 0.1501 | 0.3419 | 0.2457 B-cell translocation gene 1, anti-proliferative            |
| 122227   | Btg2    | -0.32 | 0.92  | 0.19  | -0.51 | -0.51 | 0.4889 | 0.2236 | 0.5809 | 0.4213 | 0.0530 B-cell translocation gene 2, anti-proliferative            |
| 122227   | Btg2    | 0.62  | 0.15  | 0.50  | 0.44  | 0.44  | 0.5206 | 0.4086 | 0.5631 | 0.0900 | 0.0881 B-cell translocation gene 2, anti-proliferative            |
| 122227   | Btg2    | -0.08 | 0.80  | 0.36  | 0.46  | -0.05 | 0.6294 | 0.1776 | 0.4990 | 0.1037 | 0.4268 B-cell translocation gene 2, anti-proliferative            |
| 122228   | Btg3    | 0.33  | 0.03  | 0.68  | 0.91  | 1.31  | 0.4178 | 0.6103 | 0.1255 | 0.0066 | 0.0005 B-cell translocation gene 3                                |
| 56057    | Btg4    | -0.02 | -0.02 | 0.09  | 0.03  | 0.09  | 0.6664 | 0.5685 | 0.3596 | 0.4648 | 0.1937 B-cell translocation gene 4                                |
| 170770   | Bbc3    | -0.26 | 1.22  | 0.49  | 0.21  | 0.05  | 0.5387 | 0.0136 | 0.2509 | 0.3964 | 0.4611 Bcl-2 binding component 3                                  |
| 171543   | Bnrf    | 0.20  | -0.02 | 0.23  | 0.35  | 0.80  | 0.4557 | 0.5816 | 0.4204 | 0.0674 | 0.0000 Bcl2 modifying factor                                      |
| 171543   | Bnrf    | -0.05 | -0.06 | -0.03 | -0.05 | -0.12 | 0.5204 | 0.3798 | 0.4942 | 0.4010 | 0.0675 Bcl2 modifying factor                                      |
| 171543   | Bnrf    | 0.18  | -0.04 | 0.13  | -0.13 | -0.25 | 0.5674 | 0.3738 | 0.5191 | 0.1895 | 0.0100 Bcl2 modifying factor                                      |
| 171388   | Bnrl    | -0.12 | -0.07 | -0.19 | -0.13 | -0.07 | 0.4872 | 0.6426 | 0.2641 | 0.2800 | 0.3169 BCL2adenovirus E1B 19kD interacting protein like           |
| 171388   | Bnrl    | 0.08  | 0.15  | -0.03 | 0.30  | 0.13  | 0.6221 | 0.2143 | 0.2143 | 0.3193 | 0.0249 BCL2adenovirus E1B 19kD interacting protein 1, NIP-1       |
| 224630   | Bnip1   | -0.53 | 0.33  | 0.30  | 0.13  | 0.08  | 0.3714 | 0.2716 | 0.2943 | 0.0996 | 0.3260 BCL2adenovirus E1B interacting protein 1, NIP-1            |
| 224630   | Bnip1   | -0.51 | 0.26  | 0.18  | 0.24  | 0.10  | 0.4618 | 0.2716 | 0.2943 | 0.0996 | 0.3497 BCL2adenovirus E1B interacting protein 1, NIP-1            |
| 224630   | Bnip1   | -0.02 | 0.30  | 0.50  | 0.51  | 0.64  | 0.6754 | 0.0466 | 0.0019 | 0.0066 | 0.0005 BCL2adenovirus E1B interacting protein 1, NIP-1            |
| 121775   | Bnip2   | -0.39 | -0.12 | 0.18  | 0.24  | 0.10  | 0.6728 | 0.6450 | 0.6403 | 0.4864 | 0.2838 BCL2adenovirus E1B interacting protein 1, NIP2             |
| 121775   | Bnip2   | 0.02  | 0.09  | 0.09  | 0.02  | -0.01 | 0.6765 | 0.4633 | 0.2421 | 0.0015 | 0.4520 BCL2adenovirus E1B interacting protein 1, NIP2             |
| 121775   | Bnip3   | -0.06 | -0.08 | -0.76 | 0.23  | 0.68  | 0.2776 | 0.0886 | 0.0470 | 0.3982 | 0.0018 BCL2adenovirus E1B interacting protein 1, NIP3             |
| 121775   | Bnip3   | 0.55  | -0.60 | -0.76 | 0.04  | 0.08  | 0.3824 | 0.4233 | 0.0305 | 0.3837 | 0.4080 BCL2adenovirus E1B interacting protein 3-like              |
| 121777   | Bnip3l  | 0.42  | -0.58 | 0.44  | 0.14  | -0.27 | 0.1003 | 0.1907 | 0.0357 | 0.3837 | 0.4232 BCL2adenovirus E1B interacting protein 3-like              |
| 120118   | Bak1    | -0.46 | 0.23  | 0.44  | 0.14  | -0.05 | 0.3958 | 0.1670 | 0.5715 | 0.2233 | 0.0465 BCL2-antagonist/killer 1                                   |
| 120118   | Bak1    | -0.38 | 0.71  | 0.20  | -0.35 | -0.59 | 0.4410 | 0.3206 | 0.3469 | 0.3695 | 0.0349 BCL2-antagonist/killer 1                                   |
| 120117   | Bax     | 0.43  | -0.18 | -0.14 | 0.23  | 0.30  | 0.3837 | 0.4757 | 0.4056 | 0.0069 | 0.1699 Bcl2-associated athanogene 1                               |
| 213539   | Bag1    | 0.23  | 0.14  | 0.30  | 0.70  | 0.91  | 0.5333 | 0.1033 | 0.0071 | 0.0000 | 0.0003 Bcl2-associated athanogene 2                               |
| 29810    | Bag3    | -0.19 | 0.40  | 1.19  | 0.94  | 1.06  | 0.6182 | 0.0088 | 0.0004 | 0.0394 | 0.0000 Bcl2-associated athanogene 3                               |
| 29810    | Bag3    | -0.09 | 0.63  | 0.98  | 0.58  | 0.73  | 0.2261 | 0.3292 | 0.3664 | 0.0266 | 0.0064 Bcl2-associated athanogene 3                               |
| 67384    | Bag4    | 0.29  | -0.17 | 0.31  | 0.31  | 0.45  | 0.4523 | 0.1470 | 0.1552 | 0.3185 | 0.0040 Bcl2-associated athanogene 4                               |
| 67384    | Bag4    | -0.16 | -0.19 | -0.23 | -0.08 | 0.74  | 0.4624 | 0.1949 | 0.1620 | 0.0005 | 0.3686 BCL2-associated athanogene 4                               |
| 70369    | Bag5    | -0.77 | 0.62  | 0.64  | 0.75  | 0.69  | 0.2304 | 0.5311 | 0.1269 | 0.0369 | 0.0001 BCL2-associated athanogene 5                               |
| 72567    | Bclaf1  | 0.33  | 0.22  | 0.47  | 0.29  | 0.73  | 0.3515 | 0.5408 | 0.3855 | 0.0149 | 0.0002 BCL2-associated transcription factor 1                     |
| 72567    | Bclaf1  | 0.39  | 0.00  | 0.43  | 0.65  | 0.93  | 0.4460 | 0.4075 | 0.3850 | 0.4981 | 0.0010 BCL2-associated transcription factor 1                     |
| 72567    | Bclaf1  | -0.81 | -0.01 | 0.01  | -0.03 | 0.35  | 0.5942 | 0.1294 | 0.1605 | 0.0548 | 0.0616 BCL2-associated transcription factor 1                     |
| 72567    | Bclaf1  | -0.22 | 1.15  | 0.95  | -0.55 | -0.17 | 0.3892 | 0.3102 | 0.4320 | 0.4538 | 0.3028 BCL2-associated transcription factor 1                     |
| 72567    | Bclaf1  | 0.05  | 0.04  | 0.04  | 0.05  | 0.02  | 0.6159 | 0.6394 | 0.6138 | 0.4242 | 0.4334 BCL2-associated transcription factor 1                     |
| 120208   | Bax     | 0.70  | 0.20  | 0.12  | 0.10  | 0.27  | 0.3972 | 0.3210 | 0.3348 | 0.4323 | 0.1938 Bcl2-associated X protein                                  |
| 120208   | Bax     | -0.75 | 0.19  | 0.12  | 0.12  | 0.30  | 0.4782 | 0.3545 | 0.4262 | 0.4159 | 0.1564 Bcl2-associated X protein                                  |
| 120208   | Bax     | -0.22 | 0.24  | 0.20  | 0.14  | 0.30  | 0.5272 | 0.2935 | 0.5817 | 0.5630 | 0.1721 Bcl2-associated X protein                                  |
| 120208   | Bax     | -0.17 | 0.16  | -0.06 | 0.07  | 0.28  | 0.5922 | 0.2935 | 0.5817 | 0.5630 | 0.1689 Bcl2-associated X protein                                  |
| 120208   | Bax     | 0.23  | 0.26  | 0.12  | 0.00  | 0.39  | 0.5486 | 0.2564 | 0.4566 | 0.5437 | 0.1572 Bcl2-associated X protein                                  |
| 120208   | Bax     | -0.21 | 0.21  | 0.15  | 0.03  | 0.45  | 0.5768 | 0.6344 | 0.4542 | 0.5343 | 0.1316 Bcl2-associated X protein                                  |
| 120208   | Bax     | -0.14 | -0.04 | -0.16 | -0.04 | 0.19  | 0.6186 | 0.6213 | 0.5835 | 0.5464 | 0.3004 Bcl2-associated X protein                                  |
| 120208   | Bax     | -0.10 | 0.01  | -0.03 | 0.02  | 0.10  | 0.6434 | 0.5066 | 0.5795 | 0.3998 | 0.2997 Bcl2-associated X protein                                  |
| 120208   | Bax     | -0.09 | 0.25  | -0.19 | 0.18  | 0.39  | 0.6510 | 0.4984 | 0.3557 | 0.5006 | 0.1489 Bcl2-associated X protein                                  |
| 120208   | Bax     | -0.06 | -0.05 | -0.16 | 0.07  | 0.19  | 0.6510 | 0.4984 | 0.2726 | 0.2009 | 0.3065 Bcl2-associated X protein                                  |
| 12124    | Blk     | -0.56 | 0.74  | 0.79  | 0.49  | 0.52  | 0.2846 | 0.2726 | 0.2009 | 0.0061 | 0.0197 Bcl2-interacting killer                                    |
| 12048    | Bcl2l1  | -0.39 | 2.16  | 1.84  | 1.92  | 1.84  | 0.4708 | 0.0018 | 0.0010 | 0.0002 | 0.0001 Bcl2-like 1                                                |
| 12048    | Bcl2l1  | 0.34  | 2.11  | 2.04  | 1.69  | 2.14  | 0.5128 | 0.0120 | 0.0078 | 0.0004 | 0.0000 Bcl2-like 1                                                |
| 12048    | Bcl2l1  | 0.29  | 2.01  | 1.98  | 1.78  | 1.97  | 0.5306 | 0.0088 | 0.0052 | 0.0004 | 0.0000 Bcl2-like 1                                                |
| 12048    | Bcl2l1  | 0.25  | 2.04  | 2.06  | 1.83  | 1.98  | 0.5387 | 0.0089 | 0.0022 | 0.0002 | 0.0000 Bcl2-like 1                                                |
| 12048    | Bcl2l1  | 0.27  | 1.91  | 1.97  | 1.87  | 1.91  | 0.5429 | 0.0119 | 0.0055 | 0.0001 | 0.0000 Bcl2-like 1                                                |
| 12048    | Bcl2l1  | 0.25  | 2.22  | 2.18  | 1.79  | 2.16  | 0.5760 | 0.0119 | 0.0055 | 0.0005 | 0.0000 Bcl2-like 1                                                |
| 12048    | Bcl2l1  | 0.13  | 2.23  | 2.19  | 1.79  | 1.96  | 0.5838 | 0.0065 | 0.0021 | 0.0001 | 0.0000 Bcl2-like 1                                                |
| 12048    | Bcl2l1  | 0.19  | 2.11  | 2.19  | 1.79  | 1.96  | 0.6361 | 0.0064 | 0.0028 | 0.0002 | 0.0000 Bcl2-like 1                                                |
| 12048    | Bcl2l1  | 0.12  | 2.31  | 2.26  | 1.88  | 2.12  | 0.6425 | 0.0066 | 0.0021 | 0.0001 | 0.0000 Bcl2-like 1                                                |
| 12048    | Bcl2l1  | 0.189 | 2.31  | 1.89  | 1.93  | 1.93  | 0.6506 | 0.0480 | 0.0130 | 0.0011 | 0.0001 Bcl2-like 1                                                |
| 12048    | Bcl2l1  | 0.08  | 1.24  | 1.59  | 1.46  | 1.76  | 0.6506 | 0.0480 | 0.0130 | 0.0011 | 0.0000 Bcl2-like 1                                                |
| 12048    | Bcl2l1  | 0.03  | 2.12  | 2.07  | 1.68  | 1.93  | 0.6886 | 0.0033 | 0.0019 | 0.0004 | 0.0000 Bcl2-like 1                                                |
| 12048    | Bcl2l1  | 0.00  | 0.80  | 0.70  | 0.61  | 0.74  | 0.7031 | 0.0292 | 0.0119 | 0.0018 | 0.0010 Bcl2-like 1                                                |
| 12049    | Bcl2l10 | -0.01 | -0.01 | 0.01  | 0.10  | 0.13  | 0.6797 | 0.5015 | 0.5309 | 0.2912 | 0.0995 Bcl2-like 10                                               |
| 12049    | Bcl2l11 | 0.10  | 0.03  | 0.00  | 0.08  | 0.15  | 0.3812 | 0.6499 | 0.5446 | 0.2492 | 0.0600 BCL2-like 11 (apoptosis facilitator)                       |
| 12125    | Bcl2l11 | 0.27  | -0.32 | -0.06 | 0.34  | 0.20  | 0.4391 | 0.1239 | 0.4474 | 0.1962 | 0.1996 BCL2-like 11 (apoptosis facilitator)                       |
| 12125    | Bcl2l11 | 0.01  | -0.02 | 0.03  | -0.05 | -0.06 | 0.6895 | 0.5540 | 0.5794 | 0.4240 | 0.3547 BCL2-like 11 (apoptosis facilitator)                       |
| 75736    | Bcl2l12 | -0.38 | 0.17  | -0.46 | -0.80 | -1.31 | 0.3980 | 0.6466 | 0.1426 | 0.0241 | 0.0004 BCL2-like 12 (proline rich)                                |
| 94044    | Bcl2l13 | -0.40 | -0.30 | 0.13  | 0.23  | 0.21  | 0.5268 | 0.5678 | 0.3179 | 0.1892 | 0.1590 BCL2-like 13 (apoptosis facilitator)                       |
| 66813    | Bcl2l14 | 0.34  | 0.08  | 0.01  | 0.23  | 0.62  | 0.3463 | 0.5374 | 0.4674 | 0.0288 | 0.0002 Bcl2-like 14 (apoptosis facilitator)                       |
| 12050    | Bcl2l2  | -0.29 | 0.32  | 0.22  | -0.08 | -0.27 | 0.5960 | 0.0139 | 0.0099 | 0.1202 | 0.0695 Bcl2-like 14 (apoptosis facilitator)                       |
| 12050    | Bcl2l2  | 0.09  | 0.06  | -0.24 | -0.03 | -0.08 | 0.6437 | 0.0567 | 0.0863 | 0.3191 | 0.4219 Bcl2-like 2                                                |
| 51800    | Bcl1    | -0.08 | 0.07  | -0.50 | -0.69 | -0.58 | 0.6380 | 0.6073 | 0.0519 | 0.0105 | 0.0102 Bcl-2-related ovarian killer protein                       |
| 320376   | Bcor1   | -0.09 | -0.19 | -0.68 | -0.55 | -1.03 | 0.5446 | 0.5213 | 0.0448 | 0.0348 | 0.0000 BCL6 co-repressor-like 1                                   |
| 71458    | Bcor    | 0.44  | -0.51 | -0.74 | -0.50 | -0.68 | 0.6722 | 0.0090 | 0.0038 | 0.0220 | 0.0011 BCL6 co-repressor-like 1                                   |
| 71458    | Bcor    | 0.09  | 0.58  | 0.49  | 0.68  | 0.16  | 0.2983 | 0.0695 | 0.4410 | 0.4425 | 0.1275 Bcl6 interacting corepressor                               |
| 12015    | Bad     | 0.24  | 0.24  | -0.25 | -0.32 | -0.08 | 0.5905 | 0.1304 | 0.0231 | 0.0996 | 0.0028 Bcl6 interacting corepressor                               |
| 12015    | Bad     | 0.04  | -0.01 | -0.01 | -0.04 | 0.05  | 0.2600 | 0.1525 | 0.0277 | 0.4184 | 0.0002 Bcl6 interacting corepressor                               |
| 12015    | Bad     | 0.13  | 0.01  | -0.01 | 0.04  | 0.05  | 0.5002 | 0.4699 | 0.4198 | 0.4607 | 0.2274 Bcl-associated death promoter                              |
| 10037278 | Bcap1   | -0.17 | 0.11  | -0.47 | -0.06 | -0.22 | 0.5456 | 0.5190 | 0.0722 | 0.5009 | 0.3596 Bcl-associated death promoter                              |
| 66821    | Bcs1l   | -0.23 | 0.11  | -0.47 | -0.06 | -0.22 | 0.4172 | 0.0123 | 0.0014 | 0.0011 | 0.1983 BCNP1 homolog                                              |
| 107993   | Bisp2   | 0.19  | -0.15 | -0.09 | 0.00  | -0.08 | 0.4585 | 0.2119 | 0.2616 | 0.5567 | 0.0001 BCS1-like (yeast)                                          |
| 107993   | Bisp2   | -0.08 | 0.19  | -0.50 | -0.35 | -0.72 | 0.6177 | 0.5787 | 0.0337 | 0.0759 | 0.2744 beaded filament structural protein 2, phakinin             |
| 107993   | Bisp2   | 0.06  | 0.08  | -0.26 | -0.04 | -0.24 | 0.6201 | 0.4782 | 0.0432 | 0.5050 | 0.0012 beaded filament structural protein 2, phakinin             |
| 12075    | Bisp1   | 0.03  | 0.05  | -0.17 | -0.11 | -0.31 | 0.5797 | 0.0618 | 0.3030 | 0.3030 | 0.0074 beaded filament structural protein in lens-CP94            |
| 56208    | Bcap1   | -0.41 | -0.03 | 0.05  | 0.42  | 0.64  | 0.6431 | 0.5797 | 0.3047 | 0.0696 | 0.0045 beclin 1, autophagy related                                |
| 207777   | Bzrp1   | -0.41 | 0.52  | -0.03 | 0.01  | -0.09 | 0.2430 | 0.6018 | 0.4942 | 0.0696 | 0.3208 benzodiazepine receptor associated protein 1               |
| 14705    | Bsc2    | 0.29  | 0.36  | 0.25  | -0.24 | -0.53 | 0.6983 | 0.6545 | 0.5830 | 0.2931 | 0.0339 benzodiazepine receptor, peripheral-like 1                 |
| 14705    | Bsc2    | 0.00  | 0.12  | 0.15  | 0.24  | 0.24  | 0.4550 | 0.1563 | 0.6304 | 0.4363 | 0.1953 Bernardini-Seip congenital lipodystrophy 2 homolog (human) |
| 24115    | Bes1l   | 0.19  | -0.23 | -0.69 | -0.25 | -0.48 | 0.6486 | 0.5075 | 0.5161 | 0.2722 | 0.4747 Bernardini-Seip congenital lipodystrophy 2 homolog (human) |
|          |         |       |       |       |       |       | 0.3368 | 0.4002 | 0.0133 | 0.0332 | 0.0003 bestrophin 1                                               |

|        |        |       |       |       |       |       |        |        |        |        |                                                                       |
|--------|--------|-------|-------|-------|-------|-------|--------|--------|--------|--------|-----------------------------------------------------------------------|
| 24115  | Best1  | 0.02  | 0.10  | 0.03  | -0.02 | 0.06  | 0.6396 | 0.3597 | 0.5739 | 0.4960 | 0.2450 bestrophin 1                                                   |
| 212989 | Best2  | -0.17 | -0.01 | -0.01 | 0.07  | -0.09 | 0.3533 | 0.5501 | 0.4929 | 0.4405 | 0.2182 bestrophin 2                                                   |
| 20440  | Sfga1f | -0.30 | -0.02 | -0.33 | -0.46 | -0.89 | 0.3426 | 0.4563 | 0.1906 | 0.0776 | 0.0008 beta galactoside alpha 2,6 sialyltransferase 1                 |
| 20440  | Sfga1f | 0.10  | 0.02  | 0.04  | 0.03  | -0.01 | 0.5307 | 0.5144 | 0.5462 | 0.5029 | 0.4635 beta galactoside alpha 2,6 sialyltransferase 1                 |
| 240119 | Sfga2  | 0.14  | -0.04 | -0.04 | 0.06  | 0.00  | 0.4735 | 0.3816 | 0.3363 | 0.3803 | 0.4853 beta galactoside alpha 2,6 sialyltransferase 2                 |
| 76988  | Sfga2  | 0.06  | -0.08 | -0.05 | 0.03  | 0.00  | 0.5698 | 0.6028 | 0.6145 | 0.2950 | 0.3774 beta galactoside alpha 2,6 sialyltransferase 2                 |
| B3ga1f | B3ga1f | 0.02  | 0.03  | 0.01  | 0.00  | -0.12 | 0.6696 | 0.3905 | 0.4886 | 0.5620 | 0.1337 beta-1,3-glucuronyltransferase 1 (glucuronosyltransferase P)   |
| 76988  | B3ga1f | 0.01  | 0.06  | 0.07  | 0.04  | 0.04  | 0.6778 | 0.5389 | 0.5185 | 0.4101 | 0.3434 beta-1,3-glucuronyltransferase 1 (glucuronosyltransferase P)   |
| 280645 | B3ga2  | 0.05  | 0.08  | -0.06 | 0.00  | 0.01  | 0.5569 | 0.6536 | 0.5124 | 0.5493 | 0.4374 beta-1,3-glucuronyltransferase 2 (glucuronosyltransferase S)   |
| 72727  | B3ga2  | -0.76 | 0.82  | 0.53  | 0.06  | -0.04 | 0.1761 | 0.0208 | 0.0390 | 0.0968 | 0.4374 beta-1,3-glucuronyltransferase 3 (glucuronosyltransferase I)   |
| 72727  | B3ga3  | -0.89 | 0.98  | 0.73  | 0.32  | 0.09  | 0.2328 | 0.0327 | 0.0493 | 0.0776 | 0.4374 beta-1,3-glucuronyltransferase 3 (glucuronosyltransferase I)   |
| 72727  | B3ga3  | -0.35 | 0.24  | 0.36  | -0.22 | -0.17 | 0.4035 | 0.6232 | 0.4776 | 0.1717 | 0.1359 beta-1,3-glucuronyltransferase 3 (glucuronosyltransferase I)   |
| 72727  | B3ga3  | 0.06  | 0.10  | 0.05  | 0.01  | 0.05  | 0.5602 | 0.6403 | 0.5543 | 0.5433 | 0.0968 beta-1,3-glucuronyltransferase 3 (glucuronosyltransferase I)   |
| 14421  | B4ga1f | 0.18  | 0.15  | 0.15  | 0.36  | 0.29  | 0.4429 | 0.5800 | 0.5800 | 0.0414 | 0.0165 beta-1,4-N-acetyl-galactosaminyl transferase 1                 |
| 14421  | B4ga1f | -0.12 | -0.14 | -0.31 | -0.01 | -0.13 | 0.4859 | 0.3684 | 0.1024 | 0.5217 | 0.1140 beta-1,4-N-acetyl-galactosaminyl transferase 1                 |
| 14422  | B4ga1f | -0.08 | -0.08 | -0.01 | -0.05 | -0.11 | 0.4649 | 0.6291 | 0.5960 | 0.4232 | 0.1604 beta-1,4-N-acetyl-galactosaminyl transferase 2                 |
| 330406 | B4ga1f | 0.02  | 0.03  | -0.06 | -0.01 | -0.01 | 0.6673 | 0.6286 | 0.3763 | 0.5341 | 0.4751 beta-1,4-N-acetyl-galactosaminyl transferase 3                 |
| B4ga1f | B4ga1f | -0.03 | 0.06  | 0.01  | 0.01  | -0.01 | 0.6168 | 0.3474 | 0.4510 | 0.5171 | 0.4465 beta-1,4-N-acetyl-galactosaminyl transferase 4                 |
| 12010  | B2m    | -0.42 | 0.24  | 0.24  | -0.45 | -0.20 | 0.3553 | 0.5120 | 0.3419 | 0.0908 | 0.2493 beta-2 microglobulin                                           |
| 12010  | B2m    | -0.36 | -0.43 | 0.21  | -0.47 | -0.32 | 0.3845 | 0.2833 | 0.4819 | 0.0629 | 0.0968 beta-2 microglobulin                                           |
| 12010  | B2m    | -0.69 | -0.47 | 0.20  | -0.40 | -0.16 | 0.4122 | 0.6488 | 0.3298 | 0.1157 | 0.2961 beta-2 microglobulin                                           |
| 12010  | B2m    | -0.83 | -0.23 | -0.23 | 0.11  | 0.22  | 0.4737 | 0.0763 | 0.2250 | 0.4951 | 0.3470 beta-2 microglobulin                                           |
| 12010  | B2m    | -0.11 | -0.54 | 0.08  | -0.39 | -0.17 | 0.6015 | 0.0771 | 0.6256 | 0.1259 | 0.2933 beta-2 microglobulin                                           |
| 12010  | B2m    | 0.12  | -0.60 | 0.00  | -0.35 | -0.25 | 0.6034 | 0.0870 | 0.5865 | 0.1571 | 0.1624 beta-2 microglobulin                                           |
| 12010  | B2m    | 0.12  | -0.60 | 0.00  | -0.35 | -0.22 | 0.6034 | 0.0807 | 0.4806 | 0.1869 | 0.2415 beta-2 microglobulin                                           |
| 12010  | B2m    | 0.07  | -0.62 | -0.11 | -0.35 | -0.33 | 0.6422 | 0.0685 | 0.5287 | 0.1842 | 0.1324 beta-2 microglobulin                                           |
| 12010  | B2m    | 0.08  | -0.51 | -0.08 | -0.51 | -0.13 | 0.6515 | 0.0842 | 0.5341 | 0.1440 | 0.3678 beta-2 microglobulin                                           |
| 12010  | B2m    | 0.05  | -0.74 | 0.01  | -0.55 | -0.36 | 0.6657 | 0.0468 | 0.5803 | 0.1004 | 0.0950 beta-2 microglobulin                                           |
| 12010  | B2m    | 0.02  | -0.44 | 0.10  | -0.50 | 0.00  | 0.6876 | 0.0867 | 0.6429 | 0.0891 | 0.4266 beta-2 microglobulin                                           |
| 12010  | B2m    | 0.11  | 0.03  | 0.00  | 0.00  | 0.07  | 0.4616 | 0.5438 | 0.4550 | 0.5504 | 0.2455 beta-carotene 15,15'-monooxygenase                             |
| 170752 | Bcd02  | -0.04 | 0.06  | -0.08 | -0.02 | -0.10 | 0.6360 | 0.4371 | 0.5887 | 0.5111 | 0.1819 beta-carotene 9',10'-dioxygenase 2                             |
| 12223  | B1c    | 0.23  | -0.19 | -0.32 | -0.07 | -0.14 | 0.1103 | 0.1018 | 0.0217 | 0.2888 | 0.0364 beta-cellulin, epidermal growth factor family member           |
| 12223  | B1c    | -0.07 | 0.05  | 0.01  | -0.08 | -0.01 | 0.5221 | 0.5149 | 0.6432 | 0.2856 | 0.4768 beta-cellulin, epidermal growth factor family member           |
| 12116  | Bhmt   | -0.10 | 0.04  | -0.05 | 0.26  | 0.30  | 0.5240 | 0.5711 | 0.3909 | 0.5057 | 0.3254 betaine-homocysteine methyltransferase                         |
| 17695  | Bhmt   | -0.01 | 0.03  | -0.01 | 0.14  | 0.18  | 0.6717 | 0.5628 | 0.6050 | 0.3766 | 0.2450 betaine-homocysteine methyltransferase 2                       |
| Bhmt   | Bhmt   | -0.04 | 0.03  | 0.05  | -0.11 | -0.02 | 0.6109 | 0.4792 | 0.3795 | 0.1604 | 0.4367 beta-microsomal protein                                        |
| 19895  | Bhmt   | 0.14  | -0.49 | -0.26 | -0.11 | -0.10 | 0.5599 | 0.0340 | 0.1256 | 0.4078 | 0.3505 beta-site APP cleaving enzyme 1                                |
| 23921  | Bace1  | -0.11 | -0.25 | 0.01  | 0.06  | -0.11 | 0.5396 | 0.1506 | 0.3536 | 0.4679 | 0.3505 beta-site APP-cleaving enzyme 2                                |
| 56175  | Bace2  | -0.03 | -0.10 | -0.17 | -0.13 | -0.33 | 0.6509 | 0.3507 | 0.1718 | 0.1279 | 0.0007 beta-site APP-cleaving enzyme 2                                |
| 56175  | Bace2  | -0.03 | -0.10 | -0.17 | -0.13 | -0.33 | 0.6509 | 0.3507 | 0.1718 | 0.1279 | 0.0007 beta-site APP-cleaving enzyme 2                                |
| 12234  | B1c    | 0.04  | -0.25 | -0.33 | -0.20 | -0.09 | 0.5785 | 0.5646 | 0.1715 | 0.3037 | 0.0196 beta-transducin repeat containing protein                      |
| 12122  | Bld    | -0.07 | -0.01 | -0.20 | -0.09 | -0.09 | 0.4781 | 0.2775 | 0.1534 | 0.5436 | 0.2208 BHS interacting domain death agonist                           |
| 83675  | B1c1   | 0.28  | -0.27 | -0.39 | 0.02  | 0.34  | 0.5017 | 0.5342 | 0.4269 | 0.2508 | 0.0708 bicucullin Homolog 1 (Drosophila)                              |
| 83675  | B1c1   | -0.19 | -0.06 | -0.13 | -0.24 | -0.20 | 0.5017 | 0.5342 | 0.4269 | 0.2508 | 0.1845 bicucullin Homolog 1 (Drosophila)                              |
| 83675  | B1c1   | -0.05 | -0.13 | 0.10  | 0.10  | 0.10  | 0.6587 | 0.3750 | 0.6406 | 0.5411 | 0.1964 bicucullin Homolog 1 (Drosophila)                              |
| 12121  | B1c1   | -0.08 | 0.03  | 0.06  | -0.08 | -0.14 | 0.4495 | 0.5682 | 0.4994 | 0.2708 | 0.0420 bicucullin Homolog 1 (Drosophila)                              |
| 12121  | B1c1   | -0.05 | 0.04  | 0.05  | -0.01 | -0.07 | 0.5860 | 0.4839 | 0.5213 | 0.5482 | 0.3265 bicucullin Homolog 1 (Drosophila)                              |
| 76985  | B1c2   | -0.49 | -0.15 | -0.07 | 0.15  | -0.09 | 0.1839 | 0.2911 | 0.3649 | 0.1701 | 0.2814 bicucullin Homolog 2 (Drosophila)                              |
| 76985  | B1c2   | 0.00  | 0.00  | 0.01  | 0.13  | 0.22  | 0.7022 | 0.5341 | 0.5341 | 0.2927 | 0.1206 bicucullin Homolog 2 (Drosophila)                              |
| 67118  | B1ar   | -1.01 | -0.43 | -0.72 | -1.01 | -1.23 | 0.3345 | 0.5938 | 0.6028 | 0.0011 | 0.0000 bifunctional apoptosis regulator                               |
| 12111  | Bgn    | 0.04  | -0.02 | 0.03  | 0.03  | 0.11  | 0.4596 | 0.4670 | 0.5124 | 0.1083 | 0.0071 bifunctional apoptosis regulator                               |
| 12111  | Bgn    | 0.06  | -0.90 | 0.97  | 0.90  | 1.19  | 0.6040 | 0.5144 | 0.6139 | 0.4881 | 0.0286 biglycan                                                       |
| 12012  | Baat   | 0.08  | -0.01 | 0.19  | 0.15  | 0.12  | 0.6150 | 0.6272 | 0.3133 | 0.3116 | 0.1822 bile acid-Coenzyme A: amino acid N-acyltransferase             |
| 12012  | Baat   | -0.02 | 0.04  | -0.01 | 0.00  | -0.04 | 0.6416 | 0.5709 | 0.5796 | 0.5560 | 0.3458 bile acid-Coenzyme A: amino acid N-acyltransferase             |
| 109778 | B1vra  | 0.39  | -0.24 | -0.48 | -0.27 | -0.12 | 0.3577 | 0.1923 | 0.0815 | 0.1039 | 0.2793 biliverdin reductase A                                         |
| 109778 | B1vra  | 0.04  | 0.14  | 0.09  | 0.02  | 0.00  | 0.6497 | 0.5405 | 0.6405 | 0.5232 | 0.4907 biliverdin reductase A                                         |
| 233016 | B1vrb  | 0.19  | -0.09 | 0.01  | -0.22 | -0.59 | 0.5104 | 0.5286 | 0.6158 | 0.3020 | 0.0024 biliverdin reductase B (flavin reductase (NADPH))              |
| 14533  | B1c1s1 | -0.50 | -0.01 | -0.49 | -0.22 | -0.32 | 0.2902 | 0.4327 | 0.0480 | 0.2201 | 0.0995 biogenesis of lysosome-related organelles complex-1, subunit 1 |
| 14533  | B1c1s1 | -0.26 | 0.15  | -0.25 | -0.16 | -0.92 | 0.4977 | 0.5288 | 0.4273 | 0.0219 | 0.0046 biogenesis of lysosome-related organelles complex-1, subunit 2 |
| 73689  | B1c1s2 | 0.33  | -0.05 | -0.54 | -0.19 | -0.04 | 0.4274 | 0.3802 | 0.0780 | 0.2210 | 0.4836 biogenesis of lysosome-related organelles complex-1, subunit 2 |
| 232946 | B1c1s3 | 0.39  | 0.24  | 0.01  | 0.08  | 0.17  | 0.4584 | 0.5961 | 0.4142 | 0.4182 | 0.1635 biogenesis of lysosome-related organelles complex-1, subunit 3 |
| 26363  | Bld    | -0.32 | -0.17 | 0.11  | 0.05  | -0.11 | 0.4853 | 0.5659 | 0.3238 | 0.4499 | 0.2503 biotinidase                                                    |
| 68021  | Bp1l   | -0.29 | -0.91 | -1.02 | -0.21 | -0.45 | 0.6172 | 0.5889 | 0.5358 |        |                                                                       |

|        |        |       |       |       |       |       |        |        |        |        |                                                                           |
|--------|--------|-------|-------|-------|-------|-------|--------|--------|--------|--------|---------------------------------------------------------------------------|
| 68010  | Bambi  | -0.01 | -0.28 | -0.48 | -0.36 | -0.39 | 0.6967 | 0.1270 | 0.0653 | 0.0488 | 0.0207 BMP and activin membrane-bound inhibitor, homolog (Xenopus laevis) |
| 68010  | Bambi  | 0.00  | -0.08 | -0.29 | -0.35 | -0.13 | 0.7032 | 0.4249 | 0.2147 | 0.0867 | 0.2760 BMP and activin membrane-bound inhibitor, homolog (Xenopus laevis) |
| 140780 | Bmp2k  | -0.84 | -0.09 | -0.26 | -0.72 | -0.52 | 0.4774 | 0.4774 | 0.5567 | 0.0111 | 0.0214 BMP2 inducible kinase                                              |
| 140780 | Bmp2k  | -0.03 | 0.05  | 0.29  | 0.16  | 0.40  | 0.6325 | 0.4672 | 0.1429 | 0.1525 | 0.0017 BMP2 inducible kinase                                              |
| 732300 | Bmp2k  | 0.01  | 0.17  | 0.26  | 0.04  | 0.22  | 0.6917 | 0.4381 | 0.2835 | 0.4371 | 0.0128 BMP2 inducible kinase                                              |
| 732300 | Bmp2k  | 0.32  | -0.19 | -0.02 | 0.09  | 0.16  | 0.4543 | 0.3551 | 0.5177 | 0.4882 | 0.3368 BMP-binding endothelial regulator                                  |
| 213895 | Bmp2k  | 0.10  | -0.07 | 0.06  | -0.13 | -0.27 | 0.6367 | 0.4389 | 0.5557 | 0.4439 | 0.2247 BMP-binding endothelial regulator                                  |
| 213895 | Bms1   | -0.38 | -0.20 | 0.13  | 0.13  | 0.27  | 0.4996 | 0.5634 | 0.3235 | 0.3644 | 0.1357 BMS1 homolog, ribosome assembly protein (yeast)                    |
| 213895 | Bms1   | 0.03  | 0.06  | 0.06  | 0.04  | 0.06  | 0.6319 | 0.5190 | 0.4894 | 0.4243 | 0.2921 BMS1 homolog, ribosome assembly protein (yeast)                    |
| 121699 | Bmx    | 0.12  | -0.03 | -0.03 | -0.01 | 0.05  | 0.4273 | 0.5331 | 0.4262 | 0.5476 | 0.3913 BMX non-receptor tyrosine kinase                                   |
| 70508  | Bbx    | 0.18  | 0.49  | 0.56  | 0.22  | 0.74  | 0.5044 | 0.3749 | 0.1979 | 0.0903 | 0.0008 bobby sox homolog (Drosophila)                                     |
| 70508  | Bbx    | -0.06 | 0.74  | 0.50  | -0.04 | 0.20  | 0.6435 | 0.0883 | 0.1974 | 0.4696 | 0.1041 bobby sox homolog (Drosophila)                                     |
| 75388  | Boll   | 0.06  | 0.02  | -0.03 | -0.05 | 0.14  | 0.5154 | 0.5630 | 0.5884 | 0.3640 | 0.0548 bol, boule-like (Drosophila)                                       |
| 69168  | Bola1  | -0.03 | -0.02 | -0.01 | -0.03 | -0.06 | 0.6033 | 0.6084 | 0.6355 | 0.4381 | 0.2613 bol, boule-like (Drosophila)                                       |
| 66162  | Bola2  | -0.73 | -0.73 | -0.73 | -0.73 | -1.16 | 0.6765 | 0.5701 | 0.0529 | 0.0276 | 0.0010 boA-like 1 (E. coli)                                               |
| 78653  | Bola3  | -0.11 | 0.14  | -0.51 | -0.72 | -0.84 | 0.6335 | 0.6331 | 0.0860 | 0.0260 | 0.0068 boA-like 2 (E. coli)                                               |
| 12209  | Brs3   | 0.38  | -0.18 | -0.31 | 0.06  | -0.09 | 0.2792 | 0.3669 | 0.1740 | 0.3677 | 0.3616 boA-like 3 (E. coli)                                               |
| 12096  | Bglap1 | -0.02 | -0.09 | 0.06  | -0.03 | -0.04 | 0.6473 | 0.2513 | 0.5504 | 0.4544 | 0.3519 bombesin-like receptor 3                                           |
| 12096  | Bglap1 | 0.01  | 0.05  | 0.22  | 0.33  | 0.14  | 0.6800 | 0.6183 | 0.2745 | 0.1719 | 0.0799 bone gamma-carboxyglutamate protein 1                              |
| 12095  | Bst1   | 0.00  | 0.10  | 0.11  | 0.52  | 0.03  | 0.7031 | 0.6113 | 0.5807 | 0.1706 | 0.4092 bone gamma-carboxyglutamate protein, related sequence 1            |
| 12182  | Bst1   | 0.81  | -0.44 | -0.56 | 0.08  | 0.28  | 0.0263 | 0.0386 | 0.0067 | 0.4092 | 0.0451 bone marrow stromal cell antigen 1                                 |
| 69550  | Bst2   | -1.55 | 0.94  | 0.69  | -0.54 | -0.85 | 0.0170 | 0.0393 | 0.2872 | 0.4371 | 0.0084 bone marrow stromal cell antigen 2                                 |
| 12153  | Bmp1   | -0.25 | 0.19  | 0.57  | -0.10 | -0.23 | 0.4971 | 0.0261 | 0.1343 | 0.0448 | 0.1676 bone morphogenetic protein 1                                       |
| 12153  | Bmp1   | -0.10 | 0.97  | 0.51  | 1.17  | 0.52  | 0.6207 | 0.0727 | 0.3303 | 0.0008 | 0.0183 bone morphogenetic protein 1                                       |
| 12154  | Bmp10  | 0.12  | 0.07  | 0.06  | 0.18  | 0.14  | 0.5971 | 0.3949 | 0.4277 | 0.3560 | 0.3341 bone morphogenetic protein 10                                      |
| 12155  | Bmp15  | 0.03  | -0.06 | -0.07 | 0.05  | -0.02 | 0.6290 | 0.5444 | 0.5182 | 0.3609 | 0.4120 bone morphogenetic protein 15                                      |
| 12156  | Bmp2   | 0.33  | -0.01 | 0.26  | 0.24  | 0.50  | 0.2192 | 0.5968 | 0.3196 | 0.0543 | 0.0003 bone morphogenetic protein 2                                       |
| 12156  | Bmp2   | 0.21  | -0.05 | 0.22  | 0.24  | 0.50  | 0.3268 | 0.6526 | 0.3249 | 0.0492 | 0.0005 bone morphogenetic protein 2                                       |
| 12156  | Bmp2   | 0.16  | 0.03  | 0.13  | 0.14  | 0.37  | 0.4005 | 0.6388 | 0.5181 | 0.2117 | 0.0023 bone morphogenetic protein 2                                       |
| 12156  | Bmp2   | 0.14  | -0.02 | 0.10  | 0.20  | 0.48  | 0.4172 | 0.6415 | 0.4879 | 0.0851 | 0.0012 bone morphogenetic protein 2                                       |
| 12156  | Bmp2   | 0.10  | 0.02  | 0.17  | 0.24  | 0.49  | 0.4888 | 0.5080 | 0.3396 | 0.0540 | 0.0003 bone morphogenetic protein 2                                       |
| 12156  | Bmp2   | 0.09  | -0.10 | 0.01  | 0.10  | 0.38  | 0.5434 | 0.6306 | 0.5240 | 0.2313 | 0.0003 bone morphogenetic protein 2                                       |
| 12156  | Bmp2   | -0.05 | -0.03 | 0.26  | 0.08  | 0.38  | 0.6350 | 0.5643 | 0.1440 | 0.3305 | 0.0027 bone morphogenetic protein 2                                       |
| 12156  | Bmp2   | 0.05  | -0.01 | 0.28  | 0.23  | 0.30  | 0.6356 | 0.5568 | 0.1509 | 0.0760 | 0.0028 bone morphogenetic protein 2                                       |
| 12156  | Bmp2   | -0.03 | 0.01  | 0.29  | 0.08  | 0.30  | 0.6513 | 0.5130 | 0.0985 | 0.3722 | 0.0064 bone morphogenetic protein 2                                       |
| 12156  | Bmp2   | 0.01  | -0.02 | 0.10  | 0.19  | 0.43  | 0.6902 | 0.5588 | 0.3957 | 0.1280 | 0.0032 bone morphogenetic protein 2                                       |
| 110075 | Bmp3   | -0.72 | 0.10  | 0.01  | -0.58 | -1.02 | 0.4298 | 0.3778 | 0.3900 | 0.0493 | 0.0008 bone morphogenetic protein 3                                       |
| 12159  | Bmp4   | 0.74  | -1.64 | -0.95 | -0.30 | -0.02 | 0.0568 | 0.0003 | 0.0015 | 0.1702 | 0.4709 bone morphogenetic protein 4                                       |
| 12159  | Bmp4   | 0.76  | -1.75 | -0.86 | -0.36 | -0.10 | 0.0632 | 0.0002 | 0.0024 | 0.1483 | 0.3489 bone morphogenetic protein 4                                       |
| 12159  | Bmp4   | 0.78  | -1.67 | -0.96 | -0.29 | -0.02 | 0.0760 | 0.0005 | 0.0050 | 0.2291 | 0.4722 bone morphogenetic protein 4                                       |
| 12159  | Bmp4   | 0.80  | -1.59 | -0.88 | -0.29 | 0.06  | 0.0926 | 0.0003 | 0.0055 | 0.2481 | 0.4421 bone morphogenetic protein 4                                       |
| 12159  | Bmp4   | 0.75  | -1.74 | -0.96 | -0.31 | -0.05 | 0.1207 | 0.0007 | 0.0040 | 0.2508 | 0.4274 bone morphogenetic protein 4                                       |
| 12159  | Bmp4   | 0.77  | -1.50 | -0.73 | -0.26 | 0.14  | 0.1484 | 0.0016 | 0.0269 | 0.2931 | 0.3190 bone morphogenetic protein 4                                       |
| 12159  | Bmp4   | 0.59  | -1.63 | -0.83 | -0.34 | -0.03 | 0.1519 | 0.0005 | 0.0109 | 0.1997 | 0.4666 bone morphogenetic protein 4                                       |
| 12159  | Bmp4   | 0.16  | -1.65 | -0.95 | -0.39 | -0.11 | 0.6395 | 0.1207 | 0.4157 | 0.1137 | 0.3811 bone morphogenetic protein 4                                       |
| 12159  | Bmp4   | 0.14  | -1.64 | -0.84 | -0.37 | -0.13 | 0.6434 | 0.0871 | 0.4281 | 0.1401 | 0.3477 bone morphogenetic protein 4                                       |
| 12159  | Bmp4   | 0.14  | -1.62 | -0.85 | -0.35 | -0.12 | 0.6513 | 0.1545 | 0.4920 | 0.1519 | 0.3697 bone morphogenetic protein 4                                       |
| 12160  | Bmp5   | 0.44  | 0.09  | 0.11  | 0.00  | -0.13 | 0.1167 | 0.4815 | 0.4173 | 0.5602 | 0.2510 bone morphogenetic protein 5                                       |
| 12160  | Bmp5   | 0.07  | 0.04  | 0.18  | -0.02 | 0.05  | 0.5017 | 0.4528 | 0.0544 | 0.5031 | 0.3001 bone morphogenetic protein 5                                       |
| 12160  | Bmp5   | -0.02 | 0.05  | 0.01  | -0.04 | 0.01  | 0.6515 | 0.5951 | 0.5828 | 0.3951 | 0.4750 bone morphogenetic protein 5                                       |
| 12161  | Bmp6   | 0.42  | -0.17 | 0.12  | 0.78  | 1.09  | 0.3937 | 0.5079 | 0.6132 | 0.0550 | 0.0035 bone morphogenetic protein 6                                       |
| 12161  | Bmp6   | 0.44  | -0.32 | 0.18  | 0.50  | 0.89  | 0.4773 | 0.4107 | 0.4544 | 0.2378 | 0.0340 bone morphogenetic protein 6                                       |
| 12162  | Bmp7   | -0.73 | 0.21  | -0.13 | 0.11  | -0.40 | 0.2047 | 0.2644 | 0.5341 | 0.1933 | 0.0024 bone morphogenetic protein 7                                       |
| 12162  | Bmp7   | -0.68 | 0.09  | -0.25 | 0.09  | -0.51 | 0.2441 | 0.3574 | 0.6134 | 0.2553 | 0.0004 bone morphogenetic protein 7                                       |
| 12162  | Bmp7   | -0.26 | 0.18  | -0.22 | 0.13  | -0.37 | 0.3101 | 0.5562 | 0.0942 | 0.2186 | 0.0178 bone morphogenetic protein 7                                       |
| 12162  | Bmp7   | -0.25 | 0.17  | -0.04 | 0.15  | -0.38 | 0.3650 | 0.6291 | 0.3909 | 0.1963 | 0.0027 bone morphogenetic protein 7                                       |
| 12162  | Bmp7   | -0.21 | -0.04 | -0.29 | 0.06  | -0.46 | 0.3843 | 0.5492 | 0.1646 | 0.3721 | 0.0020 bone morphogenetic protein 7                                       |
| 12162  | Bmp7   | -0.20 | 0.11  | -0.22 | 0.10  | -0.43 | 0.3967 | 0.6333 | 0.2020 | 0.2823 | 0.0038 bone morphogenetic protein 7                                       |
| 12162  | Bmp7   | -0.18 | -0.02 | -0.29 | 0.05  | -0.47 | 0.4699 | 0.4852 | 0.1369 | 0.4488 | 0.0087 bone morphogenetic protein 7                                       |
| 12162  | Bmp7   | -0.16 | 0.23  | -0.24 | 0.11  | -0.23 | 0.5176 | 0.5711 | 0.1151 | 0.3233 | 0.0129 bone morphogenetic protein 7                                       |
| 12162  | Bmp7   | -0.11 | -0.04 | -0.23 | 0.11  | -0.34 | 0.5708 | 0.4881 | 0.1906 | 0.3135 | 0.2497 bone morphogenetic protein 7                                       |
| 12162  | Bmp7   | -0.09 | 0.23  | -0.07 | 0.12  | -0.31 | 0.6027 | 0.5899 | 0.3330 | 0.2549 | 0.0342 bone morphogenetic protein 7                                       |
| 12162  | Bmp7   | -0.05 | 0.02  | -0.23 | 0.17  | -0.34 | 0.6647 | 0.5301 | 0.2117 | 0.1482 | 0.0115 bone morphogenetic protein 7                                       |
| 12163  | Bmp8a  | -0.14 | 0.38  | 0.32  | 0.09  | 0.25  | 0.4242 | 0.0983 | 0.0901 | 0.3156 | 0.0342 bone morphogenetic protein 8a                                      |
| 12164  | Bmp8b  | -0.08 | 0.02  | 0.09  | -0.09 | -0.13 | 0.6270 | 0.5437 | 0.2554 | 0.2554 | 0.1247 bone morphogenetic protein 8b                                      |
| 12166  | Bmpr1a | 0.48  | -0.46 | -0.16 | 0.05  | 0.28  | 0.1330 | 0.0327 | 0.2009 | 0.4623 | 0.0852 bone morphogenetic protein receptor, type 1A                       |
| 12166  | Bmpr1a | 0.13  | 0.04  | 0.14  | 0.14  | 0.21  | 0.3464 | 0.4940 | 0.2574 | 0.1012 | 0.0109 bone morphogenetic protein receptor, type 1A                       |
| 1216   |        |       |       |       |       |       |        |        |        |        |                                                                           |

|        |        |       |       |       |        |        |        |        |                                                                                                        |
|--------|--------|-------|-------|-------|--------|--------|--------|--------|--------------------------------------------------------------------------------------------------------|
| 118452 | Baalc  | 0.06  | 0.16  | 0.45  | 0.5187 | 0.4290 | 0.0291 | 0.0363 | 0.0005 brain and acute leukemia, cytoplasmic                                                           |
| 118452 | Baalc  | 0.03  | -0.08 | 0.00  | 0.6315 | 0.4788 | 0.3243 | 0.2940 | 0.4781 brain and acute leukemia, cytoplasmic                                                           |
| 118452 | Baalc  | 0.01  | 0.00  | 0.06  | 0.6315 | 0.5929 | 0.5929 | 0.5506 | 0.3041 brain and acute leukemia, cytoplasmic                                                           |
| 107976 | Bre    | -0.15 | 0.00  | 0.07  | 0.4709 | 0.5653 | 0.4806 | 0.2483 | 0.3947 brain and reproductive organ-expressed protein                                                  |
| 12064  | Bdnf   | 0.35  | -0.02 | 0.60  | 0.1259 | 0.0234 | 0.0234 | 0.5260 | 0.0098 brain derived neurotrophic factor                                                               |
| 12064  | Bdnf   | 0.30  | -0.21 | 0.67  | 0.3288 | 0.2207 | 0.2484 | 0.2415 | 0.0058 brain derived neurotrophic factor                                                               |
| 12064  | Bdnf   | 0.17  | -0.35 | 0.45  | 0.3591 | 0.0859 | 0.0606 | 0.0847 | 0.0321 brain derived neurotrophic factor                                                               |
| 12064  | Bdnf   | 0.17  | -0.17 | 0.59  | 0.4310 | 0.2482 | 0.3001 | 0.0362 | 0.0106 brain derived neurotrophic factor                                                               |
| 12064  | Bdnf   | -0.18 | -0.25 | 0.56  | 0.4444 | 0.2930 | 0.2497 | 0.0558 | 0.0186 brain derived neurotrophic factor                                                               |
| 12064  | Bdnf   | -0.20 | -0.07 | 0.40  | 0.5031 | 0.2162 | 0.4934 | 0.0083 | 0.1893 brain derived neurotrophic factor                                                               |
| 12064  | Bdnf   | -0.23 | -0.18 | 0.35  | 0.5154 | 0.5637 | 0.5418 | 0.1165 | 0.1893 brain derived neurotrophic factor                                                               |
| 12064  | Bdnf   | -0.31 | -0.23 | 0.38  | 0.5270 | 0.5418 | 0.5348 | 0.1165 | 0.1147 brain derived neurotrophic factor                                                               |
| 12064  | Bdnf   | -0.35 | -0.21 | 0.38  | 0.5270 | 0.5418 | 0.5348 | 0.1165 | 0.1147 brain derived neurotrophic factor                                                               |
| 12064  | Bdnf   | 0.09  | -0.11 | 0.48  | 0.5444 | 0.1692 | 0.3769 | 0.1163 | 0.0321 brain derived neurotrophic factor                                                               |
| 12064  | Bdnf   | -0.06 | -0.19 | 0.36  | 0.6159 | 0.2992 | 0.3590 | 0.0118 | 0.1097 brain derived neurotrophic factor                                                               |
| 12064  | Bdnf   | -0.01 | -0.31 | 0.43  | 0.6975 | 0.3741 | 0.2808 | 0.0466 | 0.0401 brain derived neurotrophic factor                                                               |
| 19716  | Bex1   | 0.33  | -0.55 | -0.60 | 0.1640 | 0.5759 | 0.5383 | 0.0764 | 0.0192 brain expressed gene 1                                                                          |
| 406217 | Bex4   | -0.85 | -0.16 | 0.56  | 0.3268 | 0.5196 | 0.2515 | 0.0897 | 0.0016 brain expressed gene 1                                                                          |
| 107771 | Bmyc   | 0.29  | 0.20  | 0.27  | 0.6163 | 0.4954 | 0.5933 | 0.2206 | 0.0816 brain expressed myelocytomatosis oncogene                                                       |
| 12069  | Bxan   | -1.40 | 0.54  | 0.29  | 0.0543 | 0.4473 | 0.6290 | 0.0508 | 0.0105 brain expressed X-linked 2                                                                      |
| 65115  | Bea    | 0.19  | 0.18  | 0.30  | 0.4081 | 0.5169 | 0.2708 | 0.0073 | 0.0221 brain expressed, associated with Nedd4                                                          |
| 65115  | Bea    | 1.00  | 0.91  | 0.76  | 0.4860 | 0.0033 | 0.0072 | 0.0006 | 0.0004 brain expressed, associated with Nedd4                                                          |
| 110078 | Pygb   | 0.25  | 0.20  | 0.53  | 0.4352 | 0.6189 | 0.5591 | 0.0076 | 0.0007 brain glycogen phosphorylase                                                                    |
| 59053  | Pygb   | 0.00  | 0.33  | 0.36  | 0.7034 | 0.3946 | 0.5863 | 0.0103 | 0.2460 brain glycogen phosphorylase                                                                    |
| 70456  | Bp44   | -0.81 | -0.06 | -0.88 | 0.2240 | 0.4866 | 0.5689 | 0.0018 | 0.0001 brain protein 16                                                                                |
| 55951  | Bp44   | 0.50  | -0.62 | -0.56 | 0.1935 | 0.0130 | 0.0114 | 0.5194 | 0.4627 brain protein 44                                                                                |
| 55951  | Bp44   | 0.50  | -0.69 | -0.35 | 0.2699 | 0.0384 | 0.1400 | 0.3829 | 0.1089 brain protein 44-like                                                                           |
| 55950  | Bp44   | 0.59  | -0.93 | -0.71 | 0.3441 | 0.0578 | 0.0780 | 0.3135 | 0.0792 brain protein 44-like                                                                           |
| 55950  | Bp44   | -0.09 | -0.11 | 0.34  | 0.6207 | 0.4251 | 0.3795 | 0.0242 | 0.0341 brain protein 13                                                                                |
| 55950  | Bp44   | -0.09 | -0.11 | 0.34  | 0.6207 | 0.4251 | 0.3795 | 0.0242 | 0.0341 brain protein 13                                                                                |
| 244813 | Bsx    | 0.05  | -0.40 | -0.22 | 0.6473 | 0.0274 | 0.0792 | 0.5500 | 0.2701 brain protein 13                                                                                |
| 107831 | Bai1   | 0.04  | 0.05  | 0.00  | 0.5509 | 0.4492 | 0.5358 | 0.4125 | 0.4865 brain specific homeobox                                                                         |
| 107831 | Bai1   | 0.10  | 0.03  | 0.03  | 0.2642 | 0.2668 | 0.4585 | 0.5182 | 0.1009 brain-specific angiogenesis inhibitor 1                                                         |
| 107831 | Bai1   | 0.14  | 0.03  | 0.02  | 0.3475 | 0.2021 | 0.2404 | 0.4533 | 0.4373 brain-specific angiogenesis inhibitor 1                                                         |
| 108100 | Bai2   | 0.31  | 0.56  | 0.62  | 0.5227 | 0.1044 | 0.0683 | 0.0200 | 0.0035 brain-specific angiogenesis inhibitor 1-associated protein 2                                    |
| 108100 | Bai2   | 0.02  | 0.59  | 1.47  | 0.6929 | 0.3700 | 0.0231 | 0.0080 | 0.0001 brain-specific angiogenesis inhibitor 1-associated protein 2                                    |
| 230775 | Bai2   | -0.03 | 0.02  | 0.11  | 0.6221 | 0.6138 | 0.2457 | 0.1790 | 0.1005 brain-specific angiogenesis inhibitor 2                                                         |
| 210833 | Bai3   | 0.07  | -0.16 | -0.09 | 0.6262 | 0.2231 | 0.4242 | 0.2120 | 0.2898 brain-specific angiogenesis inhibitor 2                                                         |
| 210833 | Bai3   | -0.01 | -0.06 | -0.08 | 0.5223 | 0.1259 | 0.2678 | 0.0709 | 0.1717 brain-specific angiogenesis inhibitor 3                                                         |
| 12035  | Bcat1  | 0.21  | -0.05 | -0.02 | 0.4188 | 0.3528 | 0.3640 | 0.5507 | 0.2203 brain-specific angiogenesis inhibitor 3                                                         |
| 12036  | Bcat2  | -0.32 | 0.08  | 0.06  | 0.6368 | 0.5513 | 0.4806 | 0.5578 | 0.1953 branched chain aminotransferase 1, cytosolic                                                    |
| 12036  | Bcat2  | 0.21  | -0.10 | -0.19 | 0.1732 | 0.4214 | 0.4543 | 0.2986 | 0.0197 branched chain aminotransferase 2, mitochondrial                                                |
| 12036  | Bcat2  | 0.13  | 0.02  | 0.15  | 0.4041 | 0.3448 | 0.2327 | 0.5437 | 0.0189 branched chain aminotransferase 2, mitochondrial                                                |
| 12039  | Bckha  | 0.03  | 0.18  | 0.03  | 0.5890 | 0.4441 | 0.5832 | 0.5084 | 0.1175 branched chain aminotransferase 2, mitochondrial                                                |
| 12039  | Bckha  | -0.39 | 0.12  | 0.03  | 0.1693 | 0.3971 | 0.2705 | 0.5111 | 0.4436 branched chain ketoad dehydrogenase E1, alpha polypeptide                                       |
| 12039  | Bckha  | 0.16  | -0.12 | 0.24  | 0.5509 | 0.3717 | 0.5346 | 0.0871 | 0.0013 branched chain ketoad dehydrogenase E1, alpha polypeptide                                       |
| 12040  | Bckhb  | -0.24 | -0.36 | -0.41 | 0.5904 | 0.6272 | 0.4861 | 0.2912 | 0.4714 branched chain ketoad dehydrogenase E1, beta polypeptide                                        |
| 12040  | Bckhb  | -0.42 | -0.16 | -0.04 | 0.6022 | 0.0411 | 0.3213 | 0.5005 | 0.0788 branched chain ketoad dehydrogenase E1, beta polypeptide                                        |
| 12041  | Bckdk  | -0.35 | -0.07 | -0.08 | 0.4170 | 0.5917 | 0.4022 | 0.0190 | 0.0018 branched chain ketoad dehydrogenase E1, beta polypeptide                                        |
| 72399  | Brap   | 0.36  | -0.24 | 0.15  | 0.1358 | 0.0991 | 0.1714 | 0.1143 | 0.0972 BRCA1 associated protein                                                                        |
| 72399  | Brap   | 0.59  | -0.01 | 0.30  | 0.5037 | 0.5524 | 0.0051 | 0.0001 | 0.0001 BRCA1 associated protein                                                                        |
| 104416 | Bap1   | -0.60 | 0.95  | 0.93  | 0.1650 | 0.0704 | 0.0207 | 0.3719 | 0.0709 Brcal associated protein 1                                                                      |
| 104416 | Bap1   | -0.01 | -0.03 | 0.13  | 0.6801 | 0.6362 | 0.1708 | 0.0913 | 0.2845 Brcal associated protein 1                                                                      |
| 12021  | Bard1  | -0.01 | -0.04 | -0.03 | 0.6896 | 0.6545 | 0.6306 | 0.2308 | 0.3125 BRCA1 associated RING domain 1                                                                  |
| 237911 | Brip1  | -0.09 | 0.18  | 0.05  | 0.5463 | 0.2225 | 0.4366 | 0.5361 | 0.4937 BRCA1 interacting protein C-terminal helcase 1                                                  |
| 237911 | Brip1  | -0.02 | -0.29 | -0.23 | 0.6702 | 0.0812 | 0.1715 | 0.0394 | 0.0627 BRCA1 interacting protein C-terminal helcase 1                                                  |
| 210766 | Brc3   | -0.80 | -0.81 | -0.71 | 0.4478 | 0.6402 | 0.4987 | 0.0042 | 0.0003 BRCA1/BRCA2-containing complex, subunit 1                                                       |
| 210766 | Brc3   | 0.12  | 0.45  | 0.61  | 0.4719 | 0.0284 | 0.0065 | 0.0008 | 0.0000 BRCA1/BRCA2-containing complex, subunit 3                                                       |
| 210766 | Brc3   | 0.03  | -0.01 | -0.05 | 0.6304 | 0.5649 | 0.6351 | 0.2523 | 0.4940 BRCA1/BRCA2-containing complex, subunit 3                                                       |
| 66165  | Bcop   | -0.40 | -0.14 | -0.43 | 0.5789 | 0.4624 | 0.5570 | 0.4047 | 0.0305 BRCA2 and CDKN1A interacting protein                                                            |
| 72573  | Brcd1  | 0.27  | -0.21 | -0.28 | 0.1285 | 0.1066 | 0.0834 | 0.3168 | 0.4258 BRCT domain containing 1                                                                        |
| 110279 | Bcr    | -0.28 | 0.04  | 0.14  | 0.1638 | 0.4473 | 0.0070 | 0.5209 | 0.3667 breakpoint cluster region homolog                                                               |
| 110279 | Bcr    | -0.20 | 0.68  | 0.92  | 0.4900 | 0.0663 | 0.0070 | 0.3109 | 0.0840 breakpoint cluster region homolog                                                               |
| 110279 | Bcr    | 0.05  | 0.08  | -0.04 | 0.5910 | 0.3821 | 0.6366 | 0.4456 | 0.4239 breakpoint cluster region homolog                                                               |
| 110279 | Bcr    | -0.01 | 0.03  | 0.57  | 0.7008 | 0.5726 | 0.3029 | 0.3410 | 0.1721 breakpoint cluster region homolog                                                               |
| 12189  | Brcal  | -0.08 | -0.07 | 0.00  | 0.5653 | 0.4323 | 0.5430 | 0.2504 | 0.2469 breast cancer 1                                                                                 |
| 12189  | Brcal  | -0.02 | -0.09 | -0.09 | 0.6546 | 0.5545 | 0.2814 | 0.2929 | 0.3174 breast cancer 1                                                                                 |
| 12190  | Brc2   | -0.02 | -0.13 | -0.09 | 0.6765 | 0.2313 | 0.2560 | 0.0715 | 0.2233 breast cancer 2                                                                                 |
| 12190  | Brc2   | -0.01 | -0.06 | 0.06  | 0.6970 | 0.6267 | 0.3918 | 0.3518 | 0.2919 breast cancer 2                                                                                 |
| 12927  | Bear1  | 0.28  | 0.93  | 1.87  | 0.4732 | 0.1271 | 0.0066 | 0.0002 | 0.0000 breast cancer anti-estrogen resistance 1                                                        |
| 29815  | Bear3  | 0.31  | 1.02  | 1.51  | 0.2864 | 0.0043 | 0.0002 | 0.0000 | 0.0000 breast cancer anti-estrogen resistance 3                                                        |
| 107392 | Bms1   | -0.17 | 0.43  | 0.26  | 0.4398 | 0.0263 | 0.1008 | 0.1590 | 0.0198 breast cancer metastasis-suppressor 1                                                           |
| 107392 | Bms1   | -0.27 | 0.08  | 0.33  | 0.4820 | 0.5774 | 0.4814 | 0.1841 | 0.0110 breast cancer metastasis-suppressor 1                                                           |
| 52592  | Bms1l  | 0.18  | 0.02  | 0.00  | 0.3817 | 0.5064 | 0.4834 | 0.5302 | 0.4890 breast cancer metastasis-suppressor 1-like                                                      |
| 52592  | Bms1l  | -0.16 | -0.53 | -0.58 | 0.5203 | 0.0301 | 0.0134 | 0.2741 | 0.0257 breast cancer metastasis-suppressor 1-like                                                      |
| 76960  | Bcas1  | -0.22 | -0.29 | -0.30 | 0.1995 | 0.4033 | 0.5087 | 0.0014 | 0.0000 breast carcinoma amplified sequence 1                                                           |
| 68183  | Bcas2  | 0.09  | -0.21 | 0.38  | 0.4194 | 0.0859 | 0.0617 | 0.4385 | 0.0325 breast carcinoma amplified sequence 1                                                           |
| 68183  | Bcas2  | 0.31  | 0.15  | -0.04 | 0.2132 | 0.5408 | 0.4471 | 0.0684 | 0.0257 breast carcinoma amplified sequence 2                                                           |
| 68183  | Bcas2  | 0.23  | -0.08 | -0.47 | 0.4122 | 0.4445 | 0.0207 | 0.0383 | 0.3721 breast carcinoma amplified sequence 2                                                           |
| 192197 | Bcas3  | -0.26 | 0.24  | 0.10  | 0.4190 | 0.5713 | 0.5799 | 0.5503 | 0.0022 breast carcinoma amplified sequence 3                                                           |
| 192197 | Bcas3  | 0.00  | 0.00  | 0.03  | 0.4247 | 0.5660 | 0.4481 | 0.2145 | 0.0142 breast carcinoma amplified sequence 3                                                           |
| 192197 | Bcas3  | -0.03 | -0.05 | -0.07 | 0.6291 | 0.4915 | 0.4555 | 0.2819 | 0.4713 breast carcinoma amplified sequence 3                                                           |
| 12032  | Bcan   | -0.62 | 0.75  | 1.03  | 0.3799 | 0.0716 | 0.0230 | 0.1605 | 0.0308 brevican                                                                                        |
| 72308  | Brl1   | -0.25 | 0.33  | 0.13  | 0.3553 | 0.3905 | 0.6261 | 0.4457 | 0.1256 BRP1 homolog, subunit of RNA polymerase III transcription initiation factor IIB (S. cerevisiae) |
| 66653  | Brl2   | 0.09  | -0.08 | -0.01 | 0.5202 | 0.3329 | 0.5943 | 0.5426 | 0.1715 BRP2, subunit of RNA polymerase III transcription initiation factor, BRP 1-like                 |
| 66653  | Brl2   | -0.11 | -0.03 | -0.05 | 0.5643 | 0.4889 | 0.4275 | 0.0229 | 0.0257 BRP2, subunit of RNA polymerase III transcription initiation factor, BRP 1-like                 |
| 76909  | Brl3bp | -0.34 | -0.43 | -0.87 | 0.3192 | 0.0775 | 0.0028 | 0.0022 | 0.0001 Brl3 binding protein                                                                            |
| 76909  | Brl3bp | 0.24  | -0.08 | 0.13  | 0.4054 | 0.5227 | 0.3133 | 0.3164 | 0.2566 Brl3 binding protein                                                                            |
| 76909  | Brl3bp | 0.14  | 0.19  | -0.08 | 0.5193 | 0.6204 | 0.3594 | 0.4751 | 0.3891 Brl3 binding protein                                                                            |
| 76909  | Brl3bp | 0.12  | 0.13  | 0.09  | 0.5723 | 0.6536 | 0.6021 | 0.3125 | 0.1284 Brl3 binding protein                                                                            |
| 76909  | Brl3bp | -0.07 | 0.05  | 0.02  | 0.5816 | 0.4848 | 0.5170 | 0.5052 | 0.2133 Brl3 binding protein                                                                            |
| 30848  | Brl1   | -0.72 | 0.10  | -0.38 | 0.2470 | 0.2591 | 0.3963 | 0.1685 | 0.0014 bridging integrator 1                                                                           |

|        |        |       |       |       |       |       |        |        |        |        |                                                       |
|--------|--------|-------|-------|-------|-------|-------|--------|--------|--------|--------|-------------------------------------------------------|
| 30948  | Bn1    | 0.06  | 0.09  | 0.15  | 0.14  | 0.05  | 0.5159 | 0.5030 | 0.2403 | 0.0654 | 0.2694 bridging integrator 1                          |
| 30948  | Bn1    | 0.01  | 0.17  | 0.11  | -0.02 | -0.10 | 0.6882 | 0.5965 | 0.6120 | 0.5177 | 0.2502 bridging integrator 1                          |
| 57784  | Bn3    | 0.07  | 0.43  | -0.09 | -0.05 | -0.32 | 0.6380 | 0.5018 | 0.2929 | 0.4488 | 0.2650 bridging integrator 3                          |
| 67239  | Bxc1   | 0.05  | 0.04  | -0.17 | -0.27 | -0.32 | 0.6586 | 0.4211 | 0.3257 | 0.0971 | 0.0987 bix domain containing 1                        |
| 67832  | Bxc2   | 0.59  | -1.25 | -1.70 | -1.01 | -1.13 | 0.0493 | 0.0005 | 0.0000 | 0.0001 | 0.0000 bix domain containing 2                        |
| 67832  | Bxc2   | 0.11  | 0.21  | 0.78  | 1.08  | 1.72  | 0.6605 | 0.3811 | 0.0949 | 0.0009 | 0.0000 bix domain containing 2                        |
| 70285  | Bxc5   | 0.65  | -0.83 | -0.69 | -0.06 | 0.25  | 0.0756 | 0.0065 | 0.0015 | 0.4843 | 0.0928 bix domain containing 5                        |
| 70285  | Bxc5   | 0.41  | -0.63 | -0.56 | -0.19 | -0.05 | 0.1614 | 0.0064 | 0.0087 | 0.2291 | 0.3917 bix domain containing 5                        |
| 70285  | Bxc5   | 0.31  | -0.78 | -0.51 | 0.12  | 0.52  | 0.5195 | 0.3579 | 0.5143 | 0.4392 | 0.0390 bix domain containing 5                        |
| 70285  | Bxc5   | 0.44  | -0.01 | 0.39  | 0.55  | 0.72  | 0.1214 | 0.5786 | 0.3095 | 0.0028 | 0.0002 bromo adjacent homology domain containing 1    |
| 226536 | Bahd1  | 0.10  | 0.52  | 0.56  | 0.20  | 0.39  | 0.5573 | 0.1030 | 0.0892 | 0.2019 | 0.0455 bromo adjacent homology domain containing 1    |
| 217578 | Baz1a  | 0.82  | -0.68 | -0.31 | 0.33  | 0.49  | 0.0684 | 0.0465 | 0.2530 | 0.0598 | 0.0143 bromodomain adjacent to zinc finger domain 1A  |
| 217578 | Baz1a  | 0.46  | -0.19 | 0.00  | 0.05  | -0.51 | 0.0850 | 0.3487 | 0.5101 | 0.4440 | 0.0165 bromodomain adjacent to zinc finger domain 1A  |
| 217578 | Baz1a  | -0.11 | 0.31  | 0.11  | -0.76 | 0.51  | 0.6237 | 0.5650 | 0.5689 | 0.0178 | 0.0762 bromodomain adjacent to zinc finger domain 1A  |
| 22385  | Baz1b  | -0.25 | 0.27  | -0.31 | -1.19 | -1.05 | 0.5464 | 0.6279 | 0.2374 | 0.0040 | 0.0010 bromodomain adjacent to zinc finger domain, 1B |
| 22385  | Baz1b  | 0.06  | -0.14 | -0.12 | 0.09  | 0.13  | 0.6207 | 0.6023 | 0.6178 | 0.3290 | 0.0939 bromodomain adjacent to zinc finger domain, 1B |
| 116948 | Baz2a  | -0.92 | 1.17  | 0.47  | -0.78 | -0.62 | 0.1350 | 0.0165 | 0.1218 | 0.0207 | 0.0237 bromodomain adjacent to zinc finger domain, 2A |
| 116948 | Baz2a  | -0.84 | 0.69  | 0.58  | -0.59 | -0.19 | 0.1638 | 0.0374 | 0.0683 | 0.0428 | 0.0238 bromodomain adjacent to zinc finger domain, 2A |
| 116948 | Baz2a  | -1.01 | -0.04 | 0.40  | -0.02 | 0.15  | 0.3159 | 0.4497 | 0.1916 | 0.5446 | 0.3582 bromodomain adjacent to zinc finger domain, 2A |
| 116948 | Baz2a  | 0.22  | 0.32  | 0.47  | 0.38  | 0.64  | 0.4506 | 0.4299 | 0.2700 | 0.0456 | 0.0015 bromodomain adjacent to zinc finger domain, 2A |
| 116948 | Baz2a  | -0.21 | 0.12  | 0.41  | -0.11 | 0.35  | 0.4942 | 0.6317 | 0.2581 | 0.3568 | 0.0526 bromodomain adjacent to zinc finger domain, 2A |
| 116948 | Baz2a  | 0.05  | 0.11  | 0.06  | 0.06  | 0.16  | 0.5406 | 0.4107 | 0.4320 | 0.3166 | 0.0458 bromodomain adjacent to zinc finger domain, 2A |
| 407923 | Baz2b  | -1.06 | 0.80  | 0.40  | -0.42 | -0.38 | 0.2405 | 0.0790 | 0.2035 | 0.2173 | 0.1440 bromodomain adjacent to zinc finger domain, 2B |
| 407923 | Baz2b  | 0.12  | -0.07 | 0.03  | 0.14  | 0.35  | 0.5116 | 0.4437 | 0.0699 | 0.5318 | 0.0254 bromodomain adjacent to zinc finger domain, 2B |
| 78783  | Bp1p1  | -0.55 | 1.05  | 1.11  | 0.03  | 0.31  | 0.3518 | 0.1596 | 0.0639 | 0.4234 | 0.0749 bromodomain and PHD finger containing, 1       |
| 269936 | Bp1p3  | -0.09 | 0.04  | -0.06 | -0.05 | -0.07 | 0.4989 | 0.5440 | 0.4323 | 0.1335 | 0.2746 bromodomain and PHD finger containing, 3       |
| 269936 | Bp1p3  | -0.05 | -0.14 | 0.05  | 0.19  | 0.24  | 0.6397 | 0.5647 | 0.4284 | 0.1632 | 0.0669 bromodomain and PHD finger containing, 3       |
| 93971  | Bwd1   | -0.64 | 0.39  | 0.41  | -0.33 | -0.16 | 0.2011 | 0.0826 | 0.0489 | 0.1305 | 0.2829 bromodomain and WD repeat domain containing 1  |
| 93971  | Bwd1   | -1.14 | 0.76  | 0.81  | -0.64 | -0.39 | 0.0964 | 0.1192 | 0.0775 | 0.0775 | 0.0114 bromodomain and WD repeat domain containing 1  |
| 93971  | Bwd1   | 0.09  | 0.12  | 0.43  | 0.44  | 0.56  | 0.5299 | 0.4162 | 0.0370 | 0.0019 | 0.0000 bromodomain and WD repeat domain containing 1  |
| 93971  | Bwd1   | -0.44 | -0.54 | -0.44 | -0.09 | -0.12 | 0.5771 | 0.3737 | 0.6194 | 0.0062 | 0.0000 bromodomain and WD repeat domain containing 1  |
| 93971  | Bwd1   | -0.29 | -0.96 | -0.44 | -0.33 | -0.47 | 0.5912 | 0.2832 | 0.0232 | 0.3077 | 0.0000 bromodomain and WD repeat domain containing 1  |
| 93971  | Bwd1   | -0.58 | 0.59  | -0.03 | -0.71 | -0.17 | 0.6387 | 0.3866 | 0.2832 | 0.3077 | 0.0000 bromodomain and WD repeat domain containing 1  |
| 207425 | Bwd2   | -0.58 | 0.24  | 0.33  | -0.17 | -0.17 | 0.2053 | 0.1800 | 0.4363 | 0.0130 | 0.0042 bromodomain and WD repeat domain containing 2  |
| 207425 | Bwd2   | -0.29 | -0.02 | -0.15 | 0.12  | 0.12  | 0.3467 | 0.2563 | 0.3896 | 0.2521 | 0.1610 bromodomain and WD repeat domain containing 2  |
| 362236 | Bwd3   | 0.05  | 0.07  | 0.05  | -0.03 | 0.05  | 0.5256 | 0.5646 | 0.6371 | 0.2496 | 0.2874 bromodomain and WD repeat domain containing 3  |
| 362236 | Bwd3   | 0.03  | 0.04  | 0.06  | 0.16  | -0.01 | 0.5848 | 0.5311 | 0.5767 | 0.4705 | 0.2860 bromodomain and WD repeat domain containing 3  |
| 362236 | Bwd3   | 0.12  | 0.03  | -0.15 | -0.13 | -0.15 | 0.6304 | 0.5945 | 0.5462 | 0.2548 | 0.4693 bromodomain and WD repeat domain containing 3  |
| 14312  | Bd2    | -0.75 | -0.16 | -0.15 | -1.17 | -1.82 | 0.1820 | 0.4431 | 0.0103 | 0.0002 | 0.0000 bromodomain containing 2                       |
| 67382  | Bd3    | -1.00 | -0.18 | -0.64 | -0.88 | -1.04 | 0.2709 | 0.5106 | 0.5775 | 0.0021 | 0.0002 bromodomain containing 3                       |
| 67382  | Bd3    | -0.69 | -0.10 | -0.34 | -0.60 | -0.64 | 0.4128 | 0.4561 | 0.5626 | 0.0075 | 0.0005 bromodomain containing 3                       |
| 57261  | Bd4    | 0.21  | 0.44  | 0.64  | 0.40  | 0.86  | 0.5725 | 0.4006 | 0.1708 | 0.2376 | 0.0090 bromodomain containing 4                       |
| 57261  | Bd4    | 0.04  | 0.63  | 0.75  | 0.01  | 0.21  | 0.6524 | 0.0090 | 0.0034 | 0.5581 | 0.2807 bromodomain containing 4                       |
| 26992  | Bd7    | -0.53 | -0.42 | -0.71 | -1.05 | -1.32 | 0.1357 | 0.0499 | 0.0037 | 0.0001 | 0.0000 bromodomain containing 7                       |
| 26992  | Bd7    | 0.09  | -0.27 | -0.33 | -0.35 | -0.36 | 0.5912 | 0.1987 | 0.0832 | 0.0225 | 0.0632 bromodomain containing 7                       |
| 78656  | Bd8    | 0.22  | 0.09  | 0.05  | 0.10  | 0.40  | 0.4264 | 0.5830 | 0.5248 | 0.3442 | 0.0048 bromodomain containing 8                       |
| 78656  | Bd8    | -0.36 | -0.17 | 0.00  | 0.01  | 0.11  | 0.4556 | 0.5589 | 0.4122 | 0.5534 | 0.2980 bromodomain containing 8                       |
| 78656  | Bd8    | 0.17  | 0.83  | 0.45  | -0.57 | 0.56  | 0.5092 | 0.0411 | 0.2801 | 0.0323 | 0.0707 bromodomain containing 8                       |
| 105246 | Bd9    | 0.49  | -0.41 | -0.27 | 0.38  | 0.35  | 0.2522 | 0.2536 | 0.3386 | 0.1254 | 0.2519 bromodomain PHD finger transcription factor    |
| 207165 | Bpf    | 0.66  | -0.37 | -0.50 | -0.27 | -0.34 | 0.3222 | 0.3466 | 0.1746 | 0.3670 | 0.4232 bromodomain PHD finger transcription factor    |
| 207165 | Bpf    | 0.25  | -0.77 | -0.68 | -0.31 | -0.07 | 0.5065 | 0.0248 | 0.0271 | 0.2412 | 0.1304 bromodomain PHD finger transcription factor    |
| 207165 | Bpf    | -0.10 | 0.18  | 0.31  | 0.11  | 0.18  | 0.5658 | 0.4425 | 0.3059 | 0.3906 | 0.4514 bromodomain PHD finger transcription factor    |
| 207165 | Bpf    | 0.02  | 0.09  | -0.06 | 0.05  | 0.02  | 0.6585 | 0.5149 | 0.3889 | 0.4440 | 0.3833 bromodomain, tests-specific                    |
| 114642 | Brd    | 0.00  | 0.00  | -0.10 | -0.11 | -0.04 | 0.7015 | 0.6270 | 0.3884 | 0.2086 | 0.4628 bromodomain, tests-specific                    |
| 114642 | Brd    | 0.00  | 0.08  | 0.07  | -0.05 | 0.01  | 0.7037 | 0.6172 | 0.5981 | 0.3582 | 0.0037 bruno-like 4, RNA binding protein (Drosophila) |
| 108013 | Bruno4 | -0.47 | 0.16  | -0.24 | -0.39 | -0.61 | 0.2947 | 0.2863 | 0.5884 | 0.0532 | 0.4124 bruno-like 5, RNA binding protein (Drosophila) |
| 319586 | Bruno5 | 0.07  | 0.01  | -0.04 | 0.07  | 0.03  | 0.5176 | 0.6199 | 0.5618 | 0.2857 | 0.2623 bruno-like 5, RNA binding protein (Drosophila) |
| 319586 | Bruno5 | -0.04 | -0.02 | -0.03 | -0.06 | -0.05 | 0.5991 | 0.5800 | 0.6002 | 0.3332 | 0.4326 bruno-like 5, RNA binding protein (Drosophila) |
| 319586 | Bruno5 | 0.00  | 0.00  | -0.09 | 0.00  | -0.02 | 0.7036 | 0.5661 | 0.4628 | 0.5568 | 0.1247 bruno-like 6, RNA binding protein (Drosophila) |
| 76183  | Bruno6 | 0.08  | -0.04 | 0.07  | 0.08  | 0.09  | 0.4853 | 0.5174 | 0.5369 | 0.2798 | 0.0013 Brton agammaglobulinemia tyrosine kinase       |
| 12229  | Btk    | -0.30 | 0.17  | -0.65 | -0.41 | -0.78 | 0.3459 | 0.2561 | 0.0939 | 0.0332 | 0.0007 Brton agammaglobulinemia tyrosine kinase       |
| 12229  | Btk    | -0.21 | 0.24  | -0.54 | -0.36 | -0.76 | 0.3651 | 0.2701 | 0.0182 | 0.0348 | 0.0012 Brton agammaglobulinemia tyrosine kinase       |
| 12229  | Btk    | 0.15  | 0.15  | -0.60 | -0.44 | -0.85 | 0.3680 | 0.3335 | 0.5572 | 0.0275 | 0.0013 Brton agammaglobulinemia tyrosine kinase       |
| 12229  | Btk    | -0.73 | 0.22  | -0.56 | -0.33 | -0.72 | 0.3840 | 0.3024 | 0.6178 | 0.0682 | 0.0007 Brton agammaglobulinemia tyrosine kinase       |
| 12229  | Btk    | -0.58 | 0.20  | -0.63 | -0.35 | -0.76 | 0.3941 | 0.2938 | 0.5167 | 0.0620 | 0.0007 Brton agammaglobulinemia tyrosine kinase       |
| 12229  | Btk    | -0.68 | 0.12  | -0.69 | -0.36 | -0.80 | 0.4058 | 0.3524 | 0.5687 | 0.0365 | 0.0006 Brton agammaglobulinemia tyrosine kinase       |
| 12229  | Btk    | -0.12 | 0.28  | -0.52 | -0.30 | -0.71 | 0.5330 | 0.3337 | 0.0241 | 0.0642 | 0.0012 Brton agammaglobulinemia tyrosine kinase       |
| 12229  | Btk    | -0.13 | 0.15  | -0.82 | -0.44 | -0.73 | 0.5362 | 0.4432 | 0.0167 | 0.0384 | 0.0018 Brton agammaglobulinemia tyrosine kinase       |
| 12229  | Btk    | -0.75 | -0.02 | -0.75 | -0.36 | -0.68 | 0.5764 | 0.4674 | 0.0159 | 0.0374 | 0.0028 Brton agammaglobulinemia tyrosine kinase       |
| 12229  | Btk    | 0.11  | -0.02 | -0.71 | -0.42 | -0.73 | 0.6163 | 0.6371 | 0.0113 | 0.0328 | 0.0022 Brton agammaglobulinemia tyrosine kinase       |
| 12229  | Btk    | 0.06  | 0.01  | -0.71 | -0.4  |       |        |        |        |        |                                                       |

|           |          |       |       |       |       |       |        |        |        |        |                                                                                              |
|-----------|----------|-------|-------|-------|-------|-------|--------|--------|--------|--------|----------------------------------------------------------------------------------------------|
| 39966     | Btb66    | 0.20  | -0.69 | -0.59 | -0.18 | -0.08 | 0.4584 | 0.0125 | 0.0394 | 0.2857 | 0.3389 BTB (POZ) domain containing 6                                                         |
| 238386    | Btb37    | 0.60  | -0.80 | -0.61 | 0.07  | 0.02  | 0.1788 | 0.0172 | 0.0317 | 0.4735 | 0.4659 BTB (POZ) domain containing 7                                                         |
| 238386    | Btb37    | 0.24  | -0.01 | 0.27  | 0.41  | 0.63  | 0.2963 | 0.5064 | 0.3309 | 0.1024 | 0.0001 BTB (POZ) domain containing 7                                                         |
| 238386    | Btb37    | 0.40  | -0.28 | 0.18  | 0.42  | 0.84  | 0.3112 | 0.1337 | 0.5119 | 0.1080 | 0.0028 BTB (POZ) domain containing 7                                                         |
| 238386    | Btb37    | 0.02  | -0.08 | -0.05 | -0.09 | -0.03 | 0.6509 | 0.3039 | 0.4172 | 0.2314 | 0.3839 BTB (POZ) domain containing 7                                                         |
| 224671    | Btb49    | 1.94  | 0.17  | 0.09  | -0.10 | -0.09 | 0.6388 | 0.0032 | 0.5963 | 0.4269 | 0.2351 BTB (POZ) domain containing 9                                                         |
| 224671    | Btb49    | 0.00  | 0.50  | 0.61  | 0.55  | 0.29  | 0.5963 | 0.2585 | 0.1353 | 0.0013 | 0.0175 BTB (POZ) domain containing 9                                                         |
| 224671    | Btb49    | 0.00  | 0.36  | 0.64  | 0.70  | 0.83  | 0.6987 | 0.1681 | 0.0065 | 0.0035 | 0.0001 BTB (POZ) domain containing 9                                                         |
| 12013     | Bach2    | -0.27 | 0.95  | 1.36  | -0.16 | 0.07  | 0.5400 | 0.2063 | 0.0485 | 0.3198 | 0.4108 BTB and CNC homology 1                                                                |
| 12014     | Bach2    | 0.13  | 0.25  | -0.08 | 0.34  | -0.12 | 0.5596 | 0.4960 | 0.3772 | 0.1047 | 0.2398 BTB and CNC homology 2                                                                |
| 53325     | Banp     | 0.31  | -0.74 | -1.60 | -1.20 | -1.56 | 0.3444 | 0.0056 | 0.0001 | 0.0014 | 0.0000 Bg3 associated nuclear protein                                                        |
| 215051    | Bud13    | 0.25  | -0.23 | -0.24 | -0.23 | -0.09 | 0.3823 | 0.1605 | 0.2313 | 0.1527 | 0.3298 BUD13 homolog (yeast)                                                                 |
| 215051    | Bud13    | 0.11  | -0.11 | -0.08 | -0.02 | 0.05  | 0.3986 | 0.2993 | 0.3448 | 0.4793 | 0.2529 BUD13 homolog (yeast)                                                                 |
| 231889    | Bud31    | 0.47  | -0.16 | -0.01 | 0.05  | 0.31  | 0.3767 | 0.3475 | 0.4557 | 0.5216 | 0.1286 BUD31 homolog (yeast)                                                                 |
| 231889    | Bud31    | 0.42  | -0.10 | -0.03 | -0.04 | 0.03  | 0.3969 | 0.3707 | 0.3997 | 0.5248 | 0.4612 BUD31 homolog (yeast)                                                                 |
| 12235     | Bub1     | 0.11  | -0.07 | -0.08 | -0.08 | -0.09 | 0.3915 | 0.4761 | 0.4028 | 0.2272 | 0.1539 budding uninhibited by benzimidazoles 1 homolog (S. cerevisiae)                       |
| 12236     | Bub1b    | 0.18  | -0.24 | 0.20  | 0.20  | 0.32  | 0.3770 | 0.0649 | 0.4468 | 0.1677 | 0.0327 budding uninhibited by benzimidazoles 1 homolog, beta (S. cerevisiae)                 |
| 12237     | Bub3     | 0.16  | -0.51 | -0.72 | -0.48 | -0.47 | 0.3748 | 0.0075 | 0.0006 | 0.0081 | 0.0173 budding uninhibited by benzimidazoles 3 homolog (S. cerevisiae)                       |
| 12237     | Bub3     | 0.13  | -0.10 | 0.13  | 0.21  | 0.38  | 0.4354 | 0.4939 | 0.6252 | 0.0969 | 0.0036 budding uninhibited by benzimidazoles 3 homolog (S. cerevisiae)                       |
| 12237     | Bub3     | 0.08  | 0.08  | 0.06  | -0.02 | -0.02 | 0.6009 | 0.4382 | 0.5239 | 0.5081 | 0.4162 budding uninhibited by benzimidazoles 3 homolog (S. cerevisiae)                       |
| 12237     | Bub3     | 0.00  | -0.48 | -0.91 | -0.77 | -1.00 | 0.7037 | 0.1291 | 0.0073 | 0.0007 | 0.0001 budding uninhibited by benzimidazoles 3 homolog (S. cerevisiae)                       |
| 170422    | Bbox1    | 0.25  | -0.23 | -0.48 | -0.19 | -0.27 | 0.4441 | 0.1544 | 0.0267 | 0.1635 | 0.00312 butyrobetaine (gamme), 2-oxoglutarate doxygenase 1 (gamma-butyrobetaine hydroxylase) |
| 192194    | Bttr1    | -0.09 | 0.14  | 0.13  | -0.03 | -0.02 | 0.4677 | 0.4644 | 0.4659 | 0.3761 | 0.4098 butyrophilin related 1                                                                |
| 12231     | Bttr1a1  | 0.44  | -0.34 | -0.34 | 0.05  | 0.00  | 0.4419 | 0.3672 | 0.4454 | 0.3761 | 0.4799 butyrophilin, subfamily 1, member A1                                                  |
| 12231     | Bttr1a1  | 0.01  | 0.03  | -0.02 | -0.02 | 0.02  | 0.6763 | 0.6007 | 0.6041 | 0.5003 | 0.4251 butyrophilin, subfamily 1, member A1                                                  |
| 238555    | Bm2a2    | 0.07  | 0.00  | 0.12  | -0.05 | 0.00  | 0.5505 | 0.6310 | 0.1921 | 0.4219 | 0.4856 butyrophilin, subfamily 2, member A2                                                  |
| 100038662 | Bttr1    | 0.08  | -0.10 | -0.09 | 0.00  | 0.02  | 0.5054 | 0.3422 | 0.2516 | 0.5627 | 0.4291 butyrophilin-like 1                                                                   |
| 100038662 | Bttr1    | 0.02  | -0.03 | -0.01 | 0.05  | 0.01  | 0.6634 | 0.4775 | 0.5438 | 0.2851 | 0.4709 butyrophilin-like 1                                                                   |
| 195349    | Bttr1g   | -0.04 | 0.01  | 0.03  | 0.07  | 0.07  | 0.5943 | 0.6396 | 0.5654 | 0.3186 | 0.2561 butyrophilin-like 7                                                                   |
| 237754    | Bttr1g   | 0.12  | -0.07 | -0.07 | 0.06  | 0.03  | 0.3945 | 0.3809 | 0.4043 | 0.3621 | 0.3831 butyrophilin-like 7                                                                   |
| 237754    | Bttr1g   | 0.01  | 0.11  | 0.09  | 0.06  | 0.06  | 0.6759 | 0.3345 | 0.4209 | 0.3277 | 0.2641 butyrophilin-like 9                                                                   |
| 12038     | Bche     | 0.05  | -0.01 | -0.01 | 0.08  | -0.02 | 0.5870 | 0.5656 | 0.5875 | 0.3236 | 0.4466 butyrylcholinesterase                                                                 |
| 12038     | Bche     | 0.02  | -0.11 | -0.08 | 0.40  | 0.53  | 0.6504 | 0.2983 | 0.3721 | 0.3575 | 0.3003 butyrylcholinesterase                                                                 |
| 53414     | Bysl     | 0.38  | 0.29  | 0.40  | 0.53  | 0.26  | 0.4767 | 0.6393 | 0.5921 | 0.0310 | 0.0801 bystin-like                                                                           |
| 53414     | Bysl     | 0.10  | -0.13 | -0.25 | -0.22 | -0.79 | 0.5623 | 0.2450 | 0.0985 | 0.1223 | 0.0001 bystin-like                                                                           |
| 59048     | C1galic1 | -0.41 | 0.39  | 0.06  | -0.36 | -0.45 | 0.6163 | 0.3802 | 0.1697 | 0.0041 | 0.00240 C1GAL11-specific chaperone 1                                                         |
| 59048     | C1galic1 | 0.35  | -0.40 | -0.54 | -0.23 | -0.49 | 0.2499 | 0.2501 | 0.4795 | 0.0993 | 0.0015 C1GAL11-specific chaperone 1                                                          |
| 56745     | C1qtm1   | 0.27  | 0.28  | 0.16  | 0.19  | 0.19  | 0.4057 | 0.1724 | 0.0831 | 0.1566 | 0.0902 C1q and tumor necrosis factor related protein 1                                       |
| 69183     | C1qtm2   | 0.50  | -0.37 | -0.52 | 0.12  | -0.39 | 0.3495 | 0.0916 | 0.0651 | 0.2405 | 0.0514 C1q and tumor necrosis factor related protein 2                                       |
| 81799     | C1qtm3   | 0.21  | -0.17 | -0.08 | 0.06  | 0.12  | 0.2173 | 0.3079 | 0.5125 | 0.3542 | 0.1360 C1q and tumor necrosis factor related protein 3                                       |
| 81799     | C1qtm3   | 0.02  | -0.03 | -0.02 | -0.08 | 0.08  | 0.6644 | 0.6444 | 0.6211 | 0.3092 | 0.2835 C1q and tumor necrosis factor related protein 3                                       |
| 67445     | C1qtm4   | 0.07  | 0.19  | -0.19 | -0.15 | -0.20 | 0.6486 | 0.6462 | 0.2139 | 0.2283 | 0.1343 C1q and tumor necrosis factor related protein 4                                       |
| 255312    | C1qtm5   | -0.33 | 0.20  | 0.39  | -0.30 | -0.40 | 0.4324 | 0.6518 | 0.4747 | 0.1463 | 0.0530 C1q and tumor necrosis factor related protein 5                                       |
| 255312    | C1qtm5   | -0.35 | 0.31  | 0.45  | -0.53 | -0.23 | 0.4499 | 0.5912 | 0.4171 | 0.0641 | 0.2172 C1q and tumor necrosis factor related protein 5                                       |
| 72709     | C1qtm6   | -0.33 | 0.28  | 0.76  | 0.40  | 0.33  | 0.3703 | 0.6061 | 0.0918 | 0.0949 | 0.0226 C1q and tumor necrosis factor related protein 6                                       |
| 109323    | C1qtm7   | -0.37 | -0.43 | -0.52 | -0.04 | -0.09 | 0.3449 | 0.1061 | 0.0750 | 0.5263 | 0.3853 C1q and tumor necrosis factor related protein 7                                       |
| 239126    | C1qtm9   | 0.14  | 0.02  | 0.03  | 0.18  | 0.09  | 0.2699 | 0.6007 | 0.5605 | 0.0466 | 0.1831 C1q and tumor necrosis factor related protein 9                                       |
| 67389     | C1qtm9   | 0.09  | -0.11 | 0.08  | 0.15  | 0.02  | 0.5309 | 0.5748 | 0.4708 | 0.2841 | 0.4547 C1q and tumor necrosis factor related protein 9                                       |
| 227580    | C1qtc2   | -0.71 | -0.26 | -0.10 | -0.28 | -0.42 | 0.3467 | 0.5662 | 0.4560 | 0.0622 | 0.0107 C1q domain containing 2                                                               |
| 227580    | C1q3     | -0.03 | -0.01 | 0.06  | 0.00  | -0.03 | 0.6155 | 0.6395 | 0.4928 | 0.5527 | 0.4043 C1q-like 3                                                                            |
| 227580    | C1q3     | 0.01  | 0.12  | 0.19  | 0.10  | 0.02  | 0.6735 | 0.2281 | 0.3216 | 0.1920 | 0.1189 C2 calcium-dependent domain containing 3                                              |
| 277939    | C2cd3    | -0.26 | 0.12  | 0.22  | 0.10  | 0.02  | 0.4089 | 0.3241 | 0.2378 | 0.4439 | 0.0484 C2 calcium-dependent domain containing 3                                              |
| 277939    | C2cd3    | -0.36 | 0.23  | 0.05  | -0.11 | -0.38 | 0.4278 | 0.2017 | 0.3483 | 0.4361 | 0.3950 Ca2+-dependent activator protein for secretion 2                                      |
| 320405    | Cadps2   | 0.38  | -0.11 | -0.21 | 0.11  | 0.05  | 0.2170 | 0.2785 | 0.1054 | 0.3202 | 0.0073 Ca2+-dependent activator protein for secretion 2                                      |
| 320405    | Cadps2   | -0.03 | -0.15 | -0.24 | -0.24 | -0.26 | 0.6237 | 0.1477 | 0.0267 | 0.0143 | 0.0468 Ca2+-dependent activator protein for secretion 2                                      |
| 320405    | Cadps2   | 0.02  | 0.07  | 0.16  | 0.03  | 0.18  | 0.6358 | 0.3873 | 0.1754 | 0.4506 | 0.3231 Ca2+-dependent secretion activator                                                    |
| 27062     | Cadps    | -0.06 | -0.04 | 0.01  | -0.05 | -0.05 | 0.5316 | 0.4480 | 0.6221 | 0.4271 | 0.2127 Ca2+-dependent secretion activator                                                    |
| 53127     | Cax1b    | 0.03  | 0.03  | -0.02 | 0.08  | 0.16  | 0.6113 | 0.5842 | 0.5618 | 0.1808 | 0.2063 CAAX box 1 homolog B (human)                                                          |
| 72865     | Cox1c    | 0.20  | -0.12 | -0.14 | 0.42  | 0.19  | 0.4970 | 0.5007 | 0.4916 | 0.0490 | 0.3043 CAAX box 1 homolog C (human)                                                          |
| 11350     | Abi1     | 0.04  | -0.02 | 0.11  | 0.22  | 0.08  | 0.6251 | 0.4889 | 0.5297 | 0.0657 | 0.0007 c-abl oncogene 1, receptor tyrosine kinase                                            |
| 11350     | Abi1     | 0.45  | -0.26 | 0.12  | 0.52  | 0.80  | 0.1853 | 0.2474 | 0.6150 | 0.0274 | 0.0003 c-abl oncogene 1, receptor tyrosine kinase                                            |
| 11350     | Abi1     | 0.28  | -0.08 | 0.49  | 0.81  | 1.03  | 0.3552 | 0.6212 | 0.2594 | 0.0051 | 0.3965 c-abl oncogene 1, receptor tyrosine kinase                                            |
| 320508    | Cachd1   | 0.07  | -0.06 | 0.09  | -0.01 | 0.03  | 0.5009 | 0.5241 | 0.3396 | 0.5464 | 0.0001 cache domain containing 1                                                             |
| 12550     | Cdh1     | -0.29 | 0.98  | 1.01  | 1.05  | 1.17  | 0.4445 | 0.0088 | 0.0033 | 0.0006 | 0.2984 cadherin 1                                                                            |
| 12550     | Cdh1     | 0.38  | 0.01  | 0.04  | -0.13 | -0.17 | 0.2440 | 0.5567 | 0.5731 | 0.4267 | 0.3427 cadherin 1                                                                            |
| 12550     | Cdh1     | 0.31  | 0.37  | 0.25  | -0.04 | 0.10  | 0.3914 | 0.4128 | 0.5346 | 0.5031 | 0.3427 cadherin 1                                                                            |
| 12550     | Cdh1     | 0.25  | 0.25  | 0.26  | -0.22 | -0.21 | 0.4078 | 0.4895 | 0.4111 | 0.2544 | 0.2478 cadherin 1                                                                            |
| 12550     | Cdh1     | -0.65 | 0.43  | 0.51  | -0.17 | -0.17 | 0.4450 | 0.2170 | 0.1573 | 0.4056 | 0                                                                                            |

|        |        |       |       |       |       |       |        |        |        |        |                                                                                      |
|--------|--------|-------|-------|-------|-------|-------|--------|--------|--------|--------|--------------------------------------------------------------------------------------|
| 320865 | Cdh18  | -0.01 | -0.03 | -0.06 | -0.02 | -0.05 | 0.6854 | 0.6036 | 0.5038 | 0.5060 | 0.3530 cadherin 18                                                                   |
| 227485 | Cdh19  | 0.03  | -0.08 | -0.02 | 0.00  | -0.06 | 0.6277 | 0.4571 | 0.6289 | 0.5547 | 0.2721 cadherin 19, type 2                                                           |
| 12558  | Cdh2   | -0.10 | 0.05  | -0.06 | 0.02  | -0.08 | 0.5825 | 0.5540 | 0.4893 | 0.5355 | 0.3947 cadherin 2                                                                    |
| 12558  | Cdh2   | 0.01  | 0.02  | 0.04  | 0.00  | 0.12  | 0.6812 | 0.6352 | 0.5408 | 0.5605 | 0.1250 cadherin 2                                                                    |
| 12558  | Cdh2   | 0.00  | 0.10  | 0.09  | 0.02  | 0.00  | 0.6937 | 0.3118 | 0.3111 | 0.4898 | 0.4874 cadherin 2                                                                    |
| 23836  | Cdh20  | 0.11  | 0.12  | 0.07  | 0.00  | -0.08 | 0.5846 | 0.5895 | 0.5274 | 0.5613 | 0.2325 cadherin 20                                                                   |
| 23836  | Cdh20  | 0.04  | 0.03  | -0.29 | 0.00  | 0.02  | 0.6492 | 0.5287 | 0.2536 | 0.4323 | 0.4424 cadherin 20                                                                   |
| 104010 | Cdh22  | -0.40 | 0.30  | -0.02 | -0.31 | -0.42 | 0.2352 | 0.0762 | 0.4892 | 0.0577 | 0.0095 cadherin 22                                                                   |
| 22295  | Cdh23  | 0.07  | 0.04  | -0.01 | 0.04  | 0.06  | 0.4404 | 0.5556 | 0.6130 | 0.3980 | 0.2165 cadherin 23 (otocadherin)                                                     |
| 22295  | Cdh23  | 0.08  | -0.09 | 0.01  | 0.03  | 0.03  | 0.4711 | 0.3507 | 0.6158 | 0.4628 | 0.3833 cadherin 23 (otocadherin)                                                     |
| 12560  | Cdh3   | -0.02 | 0.12  | 0.18  | 0.11  | 0.17  | 0.6683 | 0.2145 | 0.1115 | 0.2452 | 0.0895 cadherin 3                                                                    |
| 12561  | Cdh4   | 0.09  | -0.04 | 0.01  | 0.14  | 0.16  | 0.4374 | 0.6160 | 0.5789 | 0.2355 | 0.0409 cadherin 4                                                                    |
| 12561  | Cdh4   | -0.23 | 0.35  | 0.27  | 0.00  | 0.05  | 0.4894 | 0.3538 | 0.4275 | 0.5630 | 0.2724 cadherin 4                                                                    |
| 12561  | Cdh4   | -0.02 | 0.28  | 0.33  | 0.20  | 0.42  | 0.6938 | 0.1810 | 0.1211 | 0.1640 | 0.0217 cadherin 4                                                                    |
| 12562  | Cdh5   | 0.96  | 0.17  | 0.70  | 1.51  | 2.05  | 0.2000 | 0.6444 | 0.3801 | 0.0008 | 0.0000 cadherin 5                                                                    |
| 12562  | Cdh5   | 0.06  | 0.16  | 0.18  | -0.14 | -0.09 | 0.6621 | 0.6221 | 0.5870 | 0.4112 | 0.3992 cadherin 5                                                                    |
| 12563  | Cdh6   | -0.11 | 0.17  | 0.08  | 0.02  | -0.06 | 0.4186 | 0.2856 | 0.6037 | 0.3489 | 0.3649 cadherin 6                                                                    |
| 241201 | Cdh7   | -0.04 | 0.07  | 0.01  | -0.06 | 0.04  | 0.6003 | 0.4892 | 0.6199 | 0.4343 | 0.3649 cadherin 7, type 2                                                            |
| 241201 | Cdh7   | -0.03 | 0.03  | -0.01 | -0.02 | -0.02 | 0.6113 | 0.5367 | 0.6199 | 0.4343 | 0.4210 cadherin 8                                                                    |
| 12564  | Cdh8   | 0.07  | -0.04 | -0.03 | -0.01 | 0.02  | 0.4495 | 0.4776 | 0.4972 | 0.5345 | 0.4149 cadherin 8                                                                    |
| 12564  | Cdh8   | 0.04  | -0.04 | 0.09  | -0.01 | 0.02  | 0.5708 | 0.6068 | 0.2404 | 0.5428 | 0.4417 cadherin 8                                                                    |
| 12564  | Cdh8   | -0.03 | 0.04  | 0.04  | 0.02  | 0.04  | 0.6513 | 0.6278 | 0.6122 | 0.5280 | 0.4874 cadherin 8                                                                    |
| 12565  | Cdh9   | -0.09 | -0.01 | 0.02  | -0.04 | -0.03 | 0.5134 | 0.5810 | 0.6365 | 0.4552 | 0.4056 cadherin 9                                                                    |
| 12614  | Celsr1 | -0.45 | 0.13  | 0.31  | 0.32  | 0.62  | 0.2835 | 0.6109 | 0.3485 | 0.1140 | 0.0181 cadherin, EGF LAG seven-pass G-type receptor 1 (flamingo homolog, Drosophila) |
| 53983  | Celsr2 | -0.35 | 1.12  | 1.19  | 0.70  | 0.50  | 0.2516 | 0.0016 | 0.0014 | 0.0017 | 0.0148 cadherin, EGF LAG seven-pass G-type receptor 2 (flamingo homolog, Drosophila) |
| 53983  | Celsr2 | -0.32 | 0.86  | 0.82  | 0.51  | 0.35  | 0.4731 | 0.0225 | 0.0193 | 0.0581 | 0.0838 cadherin, EGF LAG seven-pass G-type receptor 2 (flamingo homolog, Drosophila) |
| 53983  | Celsr2 | 0.02  | 0.10  | 0.18  | 0.03  | -0.15 | 0.6860 | 0.5519 | 0.6139 | 0.5207 | 0.1817 cadherin, EGF LAG seven-pass G-type receptor 2 (flamingo homolog, Drosophila) |
| 107934 | Celsr3 | 0.04  | 0.06  | -0.03 | 0.01  | 0.01  | 0.5788 | 0.4805 | 0.6069 | 0.5218 | 0.4431 cadherin, EGF LAG seven-pass G-type receptor 3 (flamingo homolog, Drosophila) |
| 107934 | Celsr3 | 0.04  | 0.07  | 0.17  | 0.13  | 0.17  | 0.6306 | 0.6389 | 0.4590 | 0.2082 | 0.0693 cadherin, EGF LAG seven-pass G-type receptor 3 (flamingo homolog, Drosophila) |
| 239096 | Cdh24  | 0.09  | -0.03 | -0.05 | -0.02 | -0.05 | 0.5069 | 0.4017 | 0.3425 | 0.5151 | 0.3248 cadherin-like 24                                                              |
| 381409 | Cdh26  | -0.17 | -0.07 | -0.24 | -0.11 | -0.16 | 0.4445 | 0.4166 | 0.0999 | 0.2874 | 0.0931 cadherin-like 26                                                              |
| 12308  | Cab2   | 0.13  | 0.11  | 0.08  | -0.08 | -0.16 | 0.2535 | 0.2361 | 0.3287 | 0.1891 | 0.3852 calbindin 2                                                                   |
| 12308  | Cab2   | -0.09 | 0.06  | 0.03  | -0.12 | -0.02 | 0.3835 | 0.4379 | 0.5548 | 0.0937 | 0.4107 calbindin 2                                                                   |
| 12308  | Cab2   | -0.08 | 0.20  | 0.00  | 0.03  | 0.03  | 0.4964 | 0.3738 | 0.1559 | 0.5642 | 0.4045 calbindin 2                                                                   |
| 12308  | Cab2   | -0.05 | -0.25 | 0.12  | -0.05 | -0.04 | 0.5289 | 0.4112 | 0.2115 | 0.3447 | 0.3646 calbindin 2                                                                   |
| 12308  | Cab2   | 0.04  | -0.05 | -0.04 | -0.04 | 0.05  | 0.5938 | 0.4766 | 0.4116 | 0.4397 | 0.3113 calbindin 2                                                                   |
| 12308  | Cab2   | -0.02 | -0.04 | -0.03 | -0.07 | -0.10 | 0.6306 | 0.4827 | 0.5227 | 0.2489 | 0.1070 calbindin 2                                                                   |
| 12308  | Cab2   | 0.03  | 0.08  | 0.03  | 0.07  | -0.02 | 0.6415 | 0.3809 | 0.4783 | 0.3178 | 0.4181 calbindin 2                                                                   |
| 12308  | Cab2   | 0.03  | 0.05  | -0.09 | -0.08 | -0.01 | 0.6439 | 0.6213 | 0.2629 | 0.3331 | 0.4764 calbindin 2                                                                   |
| 12308  | Cab2   | 0.03  | -0.08 | -0.05 | -0.03 | -0.10 | 0.6454 | 0.2725 | 0.3216 | 0.4922 | 0.2060 calbindin 2                                                                   |
| 12308  | Cab2   | -0.02 | -0.06 | -0.10 | -0.10 | -0.04 | 0.6495 | 0.5398 | 0.3871 | 0.1740 | 0.3643 calbindin 2                                                                   |
| 12308  | Cab2   | -0.02 | -0.03 | 0.12  | -0.07 | -0.05 | 0.6611 | 0.5643 | 0.5236 | 0.3496 | 0.3147 calbindin 2                                                                   |
| 12308  | Cab2   | 0.00  | 0.08  | 0.00  | 0.00  | -0.02 | 0.6979 | 0.5080 | 0.5615 | 0.5595 | 0.4162 calbindin 2                                                                   |
| 12307  | Cab1   | -0.13 | -0.01 | 0.03  | -0.15 | -0.20 | 0.3199 | 0.6368 | 0.4633 | 0.0721 | 0.0202 calbindin-28K                                                                 |
| 12307  | Cab1   | 0.11  | -0.11 | 0.01  | 0.09  | 0.13  | 0.3412 | 0.1733 | 0.6261 | 0.2676 | 0.2103 calbindin-28K                                                                 |
| 12307  | Cab1   | 0.00  | 0.12  | 0.01  | 0.13  | 0.13  | 0.4395 | 0.5711 | 0.4778 | 0.1011 | 0.0748 calbindin-28K                                                                 |
| 12307  | Cab1   | 0.09  | -0.05 | -0.08 | 0.02  | 0.00  | 0.4698 | 0.4631 | 0.3296 | 0.5038 | 0.4779 calbindin-28K                                                                 |
| 12307  | Cab1   | 0.07  | -0.01 | 0.03  | -0.02 | 0.03  | 0.4725 | 0.6321 | 0.5451 | 0.4910 | 0.3669 calbindin-28K                                                                 |
| 12307  | Cab1   | -0.06 | 0.06  | -0.01 | -0.08 | -0.12 | 0.5265 | 0.5117 | 0.5589 | 0.3004 | 0.1441 calbindin-28K                                                                 |
| 12307  | Cab1   | 0.07  | -0.02 | 0.09  | -0.01 | -0.05 | 0.5496 | 0.4307 | 0.5929 | 0.5213 | 0.3454 calbindin-28K                                                                 |
| 12307  | Cab1   | -0.03 | 0.19  | 0.11  | 0.05  | 0.06  | 0.6454 | 0.4219 | 0.5603 | 0.3559 | 0.2768 calbindin-28K                                                                 |
| 12307  | Cab1   | -0.01 | -0.01 | 0.07  | 0.01  | 0.04  | 0.6688 | 0.5917 | 0.4462 | 0.5403 | 0.3462 calbindin-28K                                                                 |
| 12307  | Cab1   | -0.01 | -0.10 | 0.02  | 0.01  | -0.03 | 0.6853 | 0.4301 | 0.5573 | 0.5428 | 0.4121 calbindin-28K                                                                 |
| 104248 | Cabin1 | -1.23 | 0.72  | 0.25  | -0.82 | -0.93 | 0.1674 | 0.1018 | 0.2813 | 0.0322 | 0.0031 calcineurin binding protein 1                                                 |
| 104248 | Cabin1 | -1.23 | 0.72  | 0.25  | -0.82 | -0.93 | 0.1674 | 0.1018 | 0.2813 | 0.0322 | 0.0031 calcineurin binding protein 1                                                 |
| 104248 | Cabin1 | -0.73 | 0.29  | 0.03  | 0.06  | -0.08 | 0.2141 | 0.1975 | 0.3989 | 0.4908 | 0.4049 calcineurin binding protein 1                                                 |
| 104248 | Cabin1 | -0.11 | 0.20  | 0.36  | 0.20  | 0.47  | 0.3262 | 0.1316 | 0.0234 | 0.0379 | 0.0001 calcineurin binding protein 1                                                 |
| 12909  | Crip   | 0.19  | -0.36 | -0.51 | -0.01 | 0.04  | 0.5339 | 0.2089 | 0.0823 | 0.5575 | 0.4456 calcitonin gene-related peptide-receptor component protein                    |
| 12311  | Calcr  | -0.09 | -0.09 | 0.25  | -0.06 | 0.04  | 0.5476 | 0.6435 | 0.0675 | 0.3430 | 0.0031 calcitonin receptor                                                           |
| 12311  | Calcr  | -0.03 | 0.09  | 0.10  | 0.06  | 0.15  | 0.6132 | 0.3833 | 0.3038 | 0.3532 | 0.0628 calcitonin receptor                                                           |
| 54598  | Calci  | -0.37 | -1.34 | -1.84 | -0.78 | -1.17 | 0.3059 | 0.0141 | 0.0003 | 0.0055 | 0.0002 calcitonin receptor-like                                                      |
| 54598  | Calci  | -1.02 | -1.02 | -1.23 | -0.88 | -1.06 | 0.4425 | 0.0003 | 0.0000 | 0.0008 | 0.0000 calcitonin receptor-like                                                      |
| 12310  | Calca  | 0.27  | 0.98  | 1.24  | 1.13  | 1.23  | 0.2073 | 0.0015 | 0.0004 | 0.0000 | 0.0000 calcitonin/calcitonin-related polypeptide, alpha                              |
| 12310  | Calca  | 0.43  | 1.68  | 1.28  | 1.20  | 1.48  | 0.3947 | 0.0168 | 0.0553 | 0.0006 | 0.0000 calcitonin/calcitonin-related polypeptide, alpha                              |
| 116903 | Calcb  | 0.11  | 0.03  | 0.03  | 0.20  | 0.23  | 0.4376 | 0.5111 | 0.4898 | 0.0438 | 0.0062 calcitonin-related polypeptide, beta                                          |
| 76025  | Canf1  | 0.42  | -0.48 | -0.31 | 0.23  | 0.27  | 0.2283 | 0.1413 | 0.1495 | 0.2153 | 0.0828 calcium activated nucleoidase 1                                               |
| 76025  | Canf1  | 0.05  | 0.34  | 0.46  | 0.53  | 0.96  | 0.6103 | 0.1505 | 0.1294 | 0.0057 | 0.0000 calcium activated nucleoidase 1                                               |
| 23991  | Cib1   | -0.2  |       |       |       |       |        |        |        |        |                                                                                      |

|        |          |       |       |       |       |       |        |        |        |        |        |                                                                |
|--------|----------|-------|-------|-------|-------|-------|--------|--------|--------|--------|--------|----------------------------------------------------------------|
| 56808  | Cacna2d2 | 0.04  | -0.05 | 0.37  | -0.14 | -0.32 | 0.6849 | 0.4085 | 0.6416 | 0.4261 | 0.2385 | calcium channel, voltage-dependent, alpha 2/delta subunit 2    |
| 56808  | Cacna2d2 | 0.00  | 0.08  | 0.09  | -0.02 | 0.03  | 0.6957 | 0.5786 | 0.5451 | 0.4956 | 0.3901 | calcium channel, voltage-dependent, alpha 2/delta subunit 2    |
| 319734 | Cacna2d4 | 0.01  | -0.06 | -0.01 | -0.06 | -0.01 | 0.6877 | 0.4362 | 0.6044 | 0.3111 | 0.4421 | calcium channel, voltage-dependent, alpha 2/delta subunit 4    |
| 122933 | Cacna2d1 | -0.09 | 0.30  | 0.38  | -0.07 | 0.08  | 0.5258 | 0.0951 | 0.0206 | 0.4760 | 0.3767 | calcium channel, voltage-dependent, alpha 2/delta subunit 1    |
| 122933 | Cacna2d1 | 0.00  | -0.06 | 0.00  | 0.05  | -0.04 | 0.6976 | 0.4616 | 0.6345 | 0.3712 | 0.3334 | calcium channel, voltage-dependent, alpha 2/delta subunit 1    |
| 122934 | Cacna2d3 | 0.00  | -0.28 | 0.02  | 0.05  | 0.38  | 0.7008 | 0.5291 | 0.4526 | 0.4439 | 0.0077 | calcium channel, voltage-dependent, alpha 2/delta subunit 1    |
| 122994 | Cacnb1   | 0.06  | 0.01  | 0.07  | 0.10  | 0.15  | 0.5271 | 0.6012 | 0.3975 | 0.3034 | 0.0829 | calcium channel, voltage-dependent, alpha 2/delta subunit 3    |
| 122996 | Cacnb2   | -0.44 | 0.01  | 0.05  | -0.25 | -0.56 | 0.1338 | 0.6177 | 0.5658 | 0.1797 | 0.0071 | calcium channel, voltage-dependent, beta 1 subunit             |
| 122996 | Cacnb2   | 0.12  | 0.08  | 0.05  | 0.03  | 0.40  | 0.4740 | 0.6206 | 0.6304 | 0.4764 | 0.4044 | calcium channel, voltage-dependent, beta 2 subunit             |
| 122996 | Cacnb2   | 0.09  | -0.06 | 0.20  | 0.20  | 0.29  | 0.5100 | 0.5699 | 0.2291 | 0.1624 | 0.0122 | calcium channel, voltage-dependent, beta 2 subunit             |
| 122996 | Cacnb3   | 0.05  | 0.42  | 0.18  | 0.34  | 0.02  | 0.6490 | 0.2160 | 0.5623 | 0.0234 | 0.4373 | calcium channel, voltage-dependent, beta 3 subunit             |
| 122997 | Cacnb3   | -0.66 | -0.26 | 0.07  | 0.01  | 0.01  | 0.3115 | 0.5984 | 0.3502 | 0.5496 | 0.4839 | calcium channel, voltage-dependent, beta 3 subunit             |
| 122998 | Cacnb4   | -0.14 | -0.01 | 0.00  | -0.02 | -0.09 | 0.2762 | 0.6222 | 0.5675 | 0.5179 | 0.1546 | calcium channel, voltage-dependent, beta 4 subunit             |
| 122998 | Cacnb4   | 0.08  | -0.07 | -0.08 | -0.21 | -0.03 | 0.3699 | 0.4317 | 0.3699 | 0.3993 | 0.3752 | calcium channel, voltage-dependent, beta 4 subunit             |
| 122998 | Cacnb4   | -0.15 | 0.05  | -0.02 | -0.15 | -0.11 | 0.4489 | 0.4803 | 0.5481 | 0.2753 | 0.3113 | calcium channel, voltage-dependent, beta 4 subunit             |
| 122998 | Cacnb4   | -0.03 | -0.02 | -0.08 | 0.11  | 0.01  | 0.6177 | 0.5944 | 0.5152 | 0.2032 | 0.4615 | calcium channel, voltage-dependent, beta 4 subunit             |
| 122999 | Cacng1   | -0.30 | 0.10  | 0.20  | 0.29  | 0.20  | 0.2276 | 0.3066 | 0.0832 | 0.3364 | 0.1698 | calcium channel, voltage-dependent, gamma subunit 1            |
| 123000 | Cacng2   | 0.10  | -0.12 | -0.12 | 0.01  | 0.00  | 0.4478 | 0.3167 | 0.3006 | 0.5382 | 0.4830 | calcium channel, voltage-dependent, gamma subunit 2            |
| 123000 | Cacng2   | 0.06  | 0.04  | 0.03  | -0.02 | 0.01  | 0.5243 | 0.6035 | 0.6058 | 0.5034 | 0.4881 | calcium channel, voltage-dependent, gamma subunit 2            |
| 123000 | Cacng2   | 0.09  | 0.04  | -0.09 | 0.15  | -0.03 | 0.5423 | 0.5440 | 0.2217 | 0.2653 | 0.3819 | calcium channel, voltage-dependent, gamma subunit 2            |
| 123000 | Cacng2   | -0.03 | -0.01 | 0.04  | 0.08  | -0.05 | 0.6743 | 0.5827 | 0.6059 | 0.4215 | 0.4037 | calcium channel, voltage-dependent, gamma subunit 2            |
| 54376  | Cacng3   | -0.05 | 0.03  | 0.01  | -0.04 | 0.01  | 0.5870 | 0.4962 | 0.4049 | 0.4215 | 0.4668 | calcium channel, voltage-dependent, gamma subunit 3            |
| 54377  | Cacng4   | 0.05  | 0.03  | 0.07  | 0.08  | 0.12  | 0.5629 | 0.6536 | 0.5182 | 0.2658 | 0.0721 | calcium channel, voltage-dependent, gamma subunit 3            |
| 140723 | Cacng5   | -0.05 | 0.06  | 0.03  | 0.00  | 0.06  | 0.5873 | 0.4391 | 0.5836 | 0.5554 | 0.3236 | calcium channel, voltage-dependent, gamma subunit 5            |
| 54378  | Cacng6   | -0.05 | -0.09 | -0.17 | -0.04 | -0.08 | 0.6049 | 0.3324 | 0.4839 | 0.1184 | 0.2859 | calcium channel, voltage-dependent, gamma subunit 6            |
| 81904  | Cacng7   | 0.12  | 0.06  | -0.03 | 0.15  | 0.09  | 0.4340 | 0.4320 | 0.4839 | 0.1184 | 0.2231 | calcium channel, voltage-dependent, gamma subunit 7            |
| 81905  | Cacng8   | 0.09  | -0.06 | 0.40  | 0.65  | 0.72  | 0.2901 | 0.6197 | 0.2163 | 0.0251 | 0.3262 | calcium channel, voltage-dependent, gamma subunit 8            |
| 122889 | Cacna1d  | 0.43  | -0.30 | -0.67 | -0.24 | -0.19 | 0.5258 | 0.6124 | 0.4186 | 0.0485 | 0.0000 | calcium channel, voltage-dependent, L type, alpha 1D subunit   |
| 122889 | Cacna1d  | -0.18 | 0.18  | 0.33  | 0.19  | 0.15  | 0.5471 | 0.2411 | 0.1153 | 0.1462 | 0.2563 | calcium channel, voltage-dependent, L type, alpha 1D subunit   |
| 122889 | Cacna1d  | -0.04 | 0.08  | 0.03  | -0.04 | -0.09 | 0.5878 | 0.5169 | 0.6160 | 0.4130 | 0.0652 | calcium channel, voltage-dependent, L type, alpha 1D subunit   |
| 122892 | Cacna1s  | -0.04 | 0.66  | 0.24  | 0.76  | 0.32  | 0.4711 | 0.2380 | 0.6154 | 0.2025 | 0.1758 | calcium channel, voltage-dependent, L type, alpha 1S subunit   |
| 122992 | Cacna1s  | -0.05 | -0.07 | -0.03 | -0.15 | -0.10 | 0.6103 | 0.5628 | 0.6413 | 0.1225 | 0.3080 | calcium channel, voltage-dependent, L type, alpha 1S subunit   |
| 12287  | Cacna1b  | -0.10 | -0.07 | 0.02  | -0.16 | -0.22 | 0.5646 | 0.3087 | 0.5626 | 0.2658 | 0.1716 | calcium channel, voltage-dependent, L type, alpha 1S subunit   |
| 12286  | Cacna1a  | 0.77  | -0.84 | -0.89 | -0.03 | 0.03  | 0.4443 | 0.3817 | 0.3853 | 0.4792 | 0.1189 | calcium channel, voltage-dependent, N type, alpha 1B subunit   |
| 12286  | Cacna1a  | 0.05  | -0.03 | -0.03 | 0.13  | 0.06  | 0.5937 | 0.5401 | 0.5853 | 0.2261 | 0.4061 | calcium channel, voltage-dependent, N type, alpha 1B subunit   |
| 12290  | Cacna1e  | -0.02 | -0.04 | -0.02 | 0.04  | -0.03 | 0.6471 | 0.6095 | 0.6343 | 0.4478 | 0.3248 | calcium channel, voltage-dependent, P/Q type, alpha 1A subunit |
| 12290  | Cacna1e  | 0.03  | -0.74 | 0.02  | 0.00  | 0.00  | 0.6521 | 0.3821 | 0.6389 | 0.5613 | 0.4037 | calcium channel, voltage-dependent, R type, alpha 1E subunit   |
| 12290  | Cacna1e  | -0.01 | 0.13  | 0.01  | 0.00  | 0.05  | 0.6748 | 0.3032 | 0.5664 | 0.5628 | 0.4873 | calcium channel, voltage-dependent, R type, alpha 1E subunit   |
| 12291  | Cacna1g  | -0.08 | 0.22  | 0.08  | 0.03  | 0.09  | 0.5653 | 0.1194 | 0.4042 | 0.4998 | 0.3200 | calcium channel, voltage-dependent, R type, alpha 1E subunit   |
| 12291  | Cacna1g  | 0.16  | 0.16  | 0.09  | 0.13  | 0.12  | 0.5838 | 0.2245 | 0.4661 | 0.0771 | 0.2181 | calcium channel, voltage-dependent, T type, alpha 1G subunit   |
| 58226  | Cacna1h  | -0.04 | 0.13  | 0.05  | 0.26  | 0.11  | 0.4404 | 0.3250 | 0.4840 | 0.1851 | 0.0600 | calcium channel, voltage-dependent, T type, alpha 1G subunit   |
| 58226  | Cacna1h  | 0.04  | 0.01  | 0.09  | 0.12  | -0.01 | 0.6650 | 0.5861 | 0.4734 | 0.0628 | 0.1592 | calcium channel, voltage-dependent, T type, alpha 1G subunit   |
| 58226  | Cacna1h  | -0.02 | 0.17  | 0.04  | -0.02 | 0.00  | 0.6653 | 0.3434 | 0.6028 | 0.5225 | 0.4827 | calcium channel, voltage-dependent, T type, alpha 1H subunit   |
| 58226  | Cacna1h  | 0.00  | -0.04 | -0.03 | 0.06  | -0.01 | 0.6966 | 0.6251 | 0.6360 | 0.2480 | 0.4891 | calcium channel, voltage-dependent, T type, alpha 1H subunit   |
| 27967  | Cherp    | -0.07 | -0.64 | -0.35 | 0.01  | 0.23  | 0.6595 | 0.3233 | 0.5312 | 0.5468 | 0.2017 | calcium homeostasis endoplasmic reticulum protein              |
| 12328  | Cam1     | -0.32 | -0.68 | -0.56 | -0.39 | -0.17 | 0.4981 | 0.4162 | 0.4805 | 0.0111 | 0.2256 | calcium modulating ligand                                      |
| 52502  | Cam1sp1  | 0.53  | 0.37  | 0.98  | 1.13  | 1.53  | 0.2351 | 0.4407 | 0.0471 | 0.0029 | 0.0000 | calcium regulated heat stable protein 1                        |
| 52502  | Cam1sp1  | 0.41  | 0.44  | 1.24  | 1.08  | 1.45  | 0.2730 | 0.2721 | 0.0067 | 0.0021 | 0.0000 | calcium regulated heat stable protein 1                        |
| 52502  | Cam1sp1  | 0.27  | 0.49  | 1.12  | 1.11  | 1.51  | 0.3041 | 0.1087 | 0.0035 | 0.0003 | 0.0000 | calcium regulated heat stable protein 1                        |
| 52502  | Cam1sp1  | 0.37  | 0.52  | 1.28  | 1.09  | 1.62  | 0.3462 | 0.3034 | 0.0142 | 0.0008 | 0.0000 | calcium regulated heat stable protein 1                        |
| 52502  | Cam1sp1  | 0.32  | 0.51  | 1.10  | 1.06  | 1.53  | 0.3793 | 0.2466 | 0.0141 | 0.0035 | 0.0000 | calcium regulated heat stable protein 1                        |
| 52502  | Cam1sp1  | 0.45  | 0.67  | 1.26  | 1.02  | 1.76  | 0.3847 | 0.2385 | 0.0449 | 0.0050 | 0.0001 | calcium regulated heat stable protein 1                        |
| 52502  | Cam1sp1  | 0.27  | 0.57  | 1.28  | 1.10  | 1.66  | 0.4415 | 0.1455 | 0.0110 | 0.0015 | 0.0000 | calcium regulated heat stable protein 1                        |
| 52502  | Cam1sp1  | 0.21  | 0.59  | 0.93  | 0.71  | 0.68  | 0.4517 | 0.0931 | 0.0081 | 0.0073 | 0.0010 | calcium regulated heat stable protein 1                        |
| 52502  | Cam1sp1  | -0.31 | 0.60  | 1.49  | 1.03  | 1.40  | 0.4616 | 0.0831 | 0.0041 | 0.0005 | 0.0000 | calcium regulated heat stable protein 1                        |
| 52502  | Cam1sp1  | 0.34  | 0.76  | 1.33  | 1.05  | 1.74  | 0.4717 | 0.1798 | 0.0299 | 0.0071 | 0.0001 | calcium regulated heat stable protein 1                        |
| 52502  | Cam1sp1  | -0.63 | 0.56  | 1.31  | 1.14  | 1.51  | 0.5167 | 0.2247 | 0.0622 | 0.0000 | 0.0000 | calcium regulated heat stable protein 1                        |
| 241066 | Car1     | 0.19  | -0.02 | -0.05 | 0.10  | 0.18  | 0.2515 | 0.4254 | 0.3549 | 0.1936 | 0.0283 | calcium response factor                                        |
| 241066 | Car1     | 0.22  | -0.17 | -0.01 | -0.02 | -0.08 | 0.4098 | 0.1787 | 0.4159 | 0.5005 | 0.1946 | calcium response factor                                        |
| 241066 | Car1     | -0.07 | 0.06  | 0.00  | 0.01  | 0.04  | 0.5162 | 0.3311 | 0.5113 | 0.5272 | 0.3673 | calcium response factor                                        |
| 52163  | Camk1    | 0.19  | -0.30 | -0.04 | -0.02 | -0.14 | 0.4799 | 0.0984 | 0.4034 | 0.5415 | 0.3148 | calcium/calmodulin-dependent protein kinase I                  |
| 52163  | Camk1g   | -0.08 | -0.40 | -0.19 | 0.01  | -0.03 | 0.6477 | 0.5506 | 0.5845 | 0.5553 | 0.4554 | calcium/calmodulin-dependent protein kinase I                  |
| 215303 | Camk1g   | -0.31 | 0.39  | 0.38  | 0.16  | -0.25 | 0.4133 | 0.1214 | 0.1011 | 0.3925 | 0.1419 | calcium/calmodulin-dependent protein kinase I                  |
| 227541 | Camk1d   | 0.04  | -0.13 | 0.19  | -0.09 | 0.04  | 0.5529 | 0.1592 | 0.2240 | 0.2288 | 0.3358 | calcium/calmodulin-dependent protein kinase ID                 |
| 227541 | Camk1d   | -0.10 | 0.19  | 0.13  | 0.09  | -0.08 | 0.5974 | 0.2163 | 0.2878 | 0.3953 | 0.3366 | calcium/calmodulin-dependent protein kinase ID                 |
| 227541 | Camk1d   | -0.03 | 0.02  | -0.06 | 0.02  | -0.01 | 0.6163 | 0.5333 | 0.5174 | 0.4758 | 0.4644 | calcium/calmodulin-dependent protein kinase ID                 |

|        |          |       |       |       |       |        |        |        |        |        |                                                                  |
|--------|----------|-------|-------|-------|-------|--------|--------|--------|--------|--------|------------------------------------------------------------------|
| 68566  | Caly     | 0.47  | 0.14  | 0.24  | 0.11  | -0.14  | 0.5177 | 0.4724 | 0.5116 | 0.4148 | 0.1696 calypon neuron-specific vesicular protein                 |
| 75568  | Capsl    | 0.40  | -0.69 | -1.19 | -0.55 | -0.67  | 0.2061 | 0.0314 | 0.0006 | 0.0084 | 0.0011 calyphosine-like                                          |
| 353025 | Caps2    | 0.40  | 0.01  | 0.01  | 0.00  | -0.01  | 0.6232 | 0.5046 | 0.5894 | 0.5576 | 0.4559 calyphosphine 2                                           |
| 109924 | Cald1    | 0.47  | -0.22 | -0.36 | -0.41 | 0.04   | 0.3553 | 0.2525 | 0.1153 | 0.0754 | 0.4611 caldesmon 1                                               |
| 109924 | Cald1    | 0.40  | -0.22 | -0.36 | -0.41 | 0.04   | 0.5330 | 0.0248 | 0.0968 | 0.5490 | 0.4808 caldesmon 1                                               |
| 12745  | Cign     | 0.40  | -0.15 | 0.42  | 0.13  | -0.23  | 0.5912 | 0.4993 | 0.2628 | 0.2512 | 0.1536 calcin                                                    |
| 94040  | Cinn     | 0.02  | 0.01  | 0.12  | -0.05 | -0.03  | 0.6708 | 0.4802 | 0.5855 | 0.4363 | 0.4102 calmeglin                                                 |
| 94040  | Cinn     | 0.26  | 0.16  | 0.04  | 0.17  | 0.04   | 0.4632 | 0.6536 | 0.5379 | 0.1869 | 0.4203 calmin                                                    |
| 12313  | Calm1    | 1.05  | -0.26 | -0.08 | 0.05  | -0.06  | 0.5860 | 0.6257 | 0.4840 | 0.4806 | 0.3939 calmin                                                    |
| 12313  | Calm1    | 0.70  | -0.20 | -0.05 | 0.05  | 0.77   | 0.1333 | 0.4569 | 0.5468 | 0.0072 | 0.0001 calmodulin 1                                              |
| 12313  | Calm1    | 0.70  | -0.74 | -0.44 | 0.08  | 0.17   | 0.2248 | 0.0882 | 0.2194 | 0.5032 | 0.3540 calmodulin 1                                              |
| 12314  | Calm2    | 0.25  | -0.22 | 0.08  | 0.19  | 0.19   | 0.3192 | 0.4290 | 0.3846 | 0.1400 | 0.1152 calmodulin 1                                              |
| 12314  | Calm2    | 0.44  | -0.13 | 0.12  | 0.23  | 0.64   | 0.2784 | 0.4167 | 0.6252 | 0.1734 | 0.0020 calmodulin 2                                              |
| 12315  | Calm3    | 0.48  | 0.07  | 0.28  | 0.61  | 1.01   | 0.3188 | 0.6151 | 0.4375 | 0.0408 | 0.0038 calmodulin 2                                              |
| 12315  | Calm3    | 0.38  | 0.09  | 0.18  | 0.88  | 0.76   | 0.3553 | 0.5782 | 0.4972 | 0.0037 | 0.0014 calmodulin 3                                              |
| 12315  | Calm3    | 0.20  | 0.24  | -0.17 | -0.35 | -0.52  | 0.5257 | 0.5962 | 0.3047 | 0.0872 | 0.0073 calmodulin 3                                              |
| 12315  | Calm3    | 0.40  | -0.09 | -0.65 | 0.06  | -0.26  | 0.5543 | 0.5018 | 0.3018 | 0.5114 | 0.1975 calmodulin 3                                              |
| 80796  | Calm4    | 0.19  | -0.09 | -0.17 | 0.88  | 0.06   | 0.5747 | 0.5523 | 0.5124 | 0.2717 | 0.2997 calmodulin 4                                              |
| 80796  | Calm4    | 0.04  | 0.02  | 0.04  | 0.46  | 0.06   | 0.6681 | 0.1252 | 0.3914 | 0.2437 | 0.0264 calmodulin 4                                              |
| 80796  | Calm4    | -0.02 | 0.33  | 0.06  | 0.96  | 0.00   | 0.6222 | 0.6457 | 0.5231 | 0.5594 | 0.4496 calmodulin 5                                              |
| 494124 | Calm5    | 0.03  | -0.02 | -0.05 | 0.00  | -0.02  | 0.6681 | 0.1252 | 0.3914 | 0.2437 | 0.0264 calmodulin 5                                              |
| 100072 | Cama1    | 0.27  | 0.07  | -0.16 | 0.05  | 0.00   | 0.1993 | 0.5905 | 0.1012 | 0.4549 | 0.3609 calmodulin binding transcription activator 1              |
| 100072 | Cama1    | 0.38  | 0.22  | 0.94  | 0.58  | 1.38   | 0.3136 | 0.5786 | 0.1012 | 0.4549 | 0.0000 calmodulin binding transcription activator 1              |
| 100072 | Cama1    | -0.03 | -0.11 | -0.06 | -0.02 | -0.08  | 0.6380 | 0.5744 | 0.6303 | 0.5062 | 0.2245 calmodulin binding transcription activator 1              |
| 216874 | Cama2    | 0.15  | -0.01 | 0.05  | 0.03  | 0.12   | 0.4261 | 0.4230 | 0.5538 | 0.4496 | 0.0114 calmodulin binding transcription activator 2              |
| 216874 | Cama2    | 0.09  | -0.04 | 0.10  | 0.17  | 0.31   | 0.5903 | 0.6428 | 0.4691 | 0.2658 | 0.0083 calmodulin regulated spectrin-associated protein 1        |
| 227634 | Camsap1  | -0.33 | -0.31 | -0.27 | -0.59 | -0.57  | 0.2800 | 0.3091 | 0.2517 | 0.0109 | 0.3641 calmodulin regulated spectrin-associated protein 1-like 1 |
| 227634 | Camsap1  | 0.10  | -0.15 | -0.09 | -0.06 | -0.18  | 0.5422 | 0.2255 | 0.2745 | 0.4619 | 0.0279 calmodulin regulated spectrin-associated protein 1-like 1 |
| 60594  | Camsap11 | 0.56  | -0.57 | -0.20 | 0.12  | 0.7886 | 0.1674 | 0.0352 | 0.1984 | 0.3628 | 0.2295 calmodulin regulated spectrin-associated protein 1-like 1 |
| 67886  | Camsap11 | -0.23 | 0.31  | 0.16  | -0.63 | -0.50  | 0.4882 | 0.4775 | 0.6155 | 0.0164 | 0.0000 calmodulin-like 3                                         |
| 67886  | Camsap11 | 0.07  | -0.03 | 0.02  | -0.05 | -0.07  | 0.5801 | 0.3809 | 0.4680 | 0.3964 | 0.0010 calmodulin-like 3                                         |
| 70405  | Calm3    | -0.51 | -0.37 | -1.06 | -0.46 | -1.52  | 0.3411 | 0.5183 | 0.1030 | 0.4275 | 0.0010 calmodulin-like 4                                         |
| 140904 | Calm4    | 0.35  | -0.28 | -1.04 | -0.47 | -0.59  | 0.1823 | 0.1330 | 0.0007 | 0.0040 | 0.0010 calmodulin-like 4                                         |
| 140904 | Calm4    | -0.23 | 0.07  | -0.06 | -0.16 | -0.16  | 0.1420 | 0.4467 | 0.5629 | 0.1207 | 0.0838 calneuron 1                                               |
| 140904 | Calm4    | 0.07  | -0.06 | -0.01 | 0.05  | 0.06   | 0.4981 | 0.1420 | 0.4048 | 0.3968 | 0.2887 calneuron 1                                               |
| 123300 | Canax    | 0.47  | -0.31 | -0.30 | -0.06 | 0.31   | 0.1754 | 0.1548 | 0.1550 | 0.4526 | 0.0075 calnexin                                                  |
| 123300 | Canax    | 0.22  | -0.30 | 0.01  | 0.18  | 0.25   | 0.4226 | 0.4191 | 0.4688 | 0.0405 | 0.0124 calnexin                                                  |
| 123330 | Capn1    | -0.15 | 0.62  | 0.31  | -0.08 | -0.01  | 0.5958 | 0.0659 | 0.2032 | 0.4805 | 0.4827 calnexin                                                  |
| 123330 | Capn1    | -0.08 | -0.07 | 0.33  | 0.40  | 0.23   | 0.6074 | 0.6075 | 0.1655 | 0.0811 | 0.0666 calpain 1                                                 |
| 238300 | Capn10   | -0.32 | -0.43 | -0.81 | -0.78 | -0.90  | 0.2620 | 0.0326 | 0.0042 | 0.0001 | 0.0000 calpain 10                                                |
| 286958 | Capn11   | -0.11 | 0.11  | 0.04  | -0.09 | -0.07  | 0.4131 | 0.4213 | 0.5899 | 0.2927 | 0.2616 calpain 11                                                |
| 60594  | Capn12   | 0.05  | 0.04  | 0.12  | -0.11 | -0.13  | 0.6246 | 0.6222 | 0.4946 | 0.1830 | 0.0628 calpain 12                                                |
| 60594  | Capn12   | -0.08 | 0.04  | 0.01  | -0.02 | 0.01   | 0.5908 | 0.6246 | 0.4617 | 0.0123 | 0.0012 calpain 12                                                |
| 123334 | Capn2    | 0.38  | -0.60 | -0.02 | 0.01  | 1.55   | 0.6428 | 0.5861 | 0.5492 | 0.5202 | 0.4785 calpain 3                                                 |
| 123335 | Capn3    | -0.12 | 0.02  | -0.03 | -0.01 | -0.01  | 0.3428 | 0.5861 | 0.2146 | 0.3688 | 0.3665 calpain 3                                                 |
| 123335 | Capn3    | 0.00  | 0.06  | 0.10  | 0.06  | 0.05   | 0.6941 | 0.4577 | 0.1540 | 0.5376 | 0.0002 calpain 5                                                 |
| 123337 | Capn5    | -0.68 | 0.00  | 0.47  | -0.02 | -0.61  | 0.0042 | 0.0052 | 0.4971 | 0.4579 | 0.3802 calpain 6                                                 |
| 123338 | Capn6    | 0.06  | -0.01 | -0.03 | 0.03  | 0.03   | 0.4940 | 0.5835 | 0.6371 | 0.3073 | 0.0472 calpain 6                                                 |
| 123338 | Capn6    | 0.10  | -0.32 | 0.04  | 0.17  | 0.31   | 0.5543 | 0.0230 | 0.6371 | 0.3073 | 0.0801 calpain 7                                                 |
| 123339 | Capn7    | 0.18  | -0.10 | 0.07  | 0.01  | 0.23   | 0.5255 | 0.4036 | 0.5780 | 0.5492 | 0.0612 calpain 7                                                 |
| 123339 | Capn7    | -0.20 | -0.35 | -0.11 | 0.22  | 0.30   | 0.5985 | 0.6326 | 0.4783 | 0.0975 | 0.1644 calpain 8                                                 |
| 170725 | Capn8    | 0.04  | -0.18 | -0.11 | -0.08 | -0.10  | 0.6076 | 0.2051 | 0.4203 | 0.2433 | 0.1724 calpain 8                                                 |
| 170725 | Capn8    | 0.00  | 0.00  | 0.15  | 0.04  | 0.01   | 0.6974 | 0.5467 | 0.4203 | 0.4138 | 0.4325 calpain 9 (nCL-4)                                         |
| 73947  | Capn9    | 0.09  | 0.01  | 0.01  | 0.04  | 0.02   | 0.4940 | 0.5144 | 0.4873 | 0.3960 | 0.0144 calpain, small subunit 1                                  |
| 12336  | Capn9    | 0.44  | -0.53 | 0.29  | 0.72  | 0.89   | 0.4225 | 0.2491 | 0.5264 | 0.1072 | 0.0144 calpain, small subunit 2                                  |
| 69543  | Capn9    | 0.03  | -0.09 | -0.05 | 0.23  | -0.05  | 0.6294 | 0.3059 | 0.5104 | 0.3749 | 0.3416 calpain, small subunit 2                                  |
| 12380  | Capn2    | 0.30  | 0.46  | 0.46  | 0.21  | 0.23   | 0.1920 | 0.0744 | 0.0705 | 0.1296 | 0.1297 calpastatin                                               |
| 12380  | Capn2    | 0.48  | -0.30 | 0.30  | 0.62  | 0.97   | 0.2164 | 0.3011 | 0.0195 | 0.3034 | 0.0029 calpastatin                                               |
| 12380  | Capn2    | 0.10  | 0.27  | 0.30  | 0.13  | 0.06   | 0.6040 | 0.1630 | 0.1641 | 0.3887 | 0.4247 calpastatin                                               |
| 12380  | Capn2    | -0.13 | 0.64  | 0.47  | -0.43 | -0.16  | 0.6040 | 0.1630 | 0.1641 | 0.3887 | 0.1206 calpastatin                                               |
| 12797  | Cnn1     | 0.57  | 0.57  | 0.36  | 0.77  | 0.77   | 0.4748 | 0.3908 | 0.4887 | 0.0146 | 0.0045 calponin 1                                                |
| 12798  | Cnn2     | 0.11  | 0.10  | -0.08 | 0.01  | -0.22  | 0.5554 | 0.6509 | 0.3470 | 0.5492 | 0.0145 calponin 1                                                |
| 71994  | Cnn3     | -0.07 | -0.02 | 0.18  | 0.34  | 0.23   | 0.6700 | 0.4155 | 0.2694 | 0.0453 | 0.1321 calponin 2                                                |
| 12317  | Calr     | 0.13  | 0.04  | 0.25  | 0.16  | 0.30   | 0.5122 | 0.5377 | 0.2714 | 0.3722 | 0.1323 calponin 3                                                |
| 12317  | Calr     | 0.06  | 0.60  | 0.60  | 0.39  | -0.24  | 0.6433 | 0.1368 | 0.2409 | 0.1275 | 0.0628 calreticulin                                              |
| 73316  | Calr     | 0.56  | -0.11 | -0.30 | 0.03  | -0.08  | 0.0854 | 0.6278 | 0.2593 | 0.5006 | 0.2369 calreticulin                                              |
| 108902 | Calr4    | 0.04  | 0.02  | -0.07 | 0.00  | -0.02  | 0.6122 | 0.5555 | 0.2716 | 0.5504 | 0.4275 calreticulin 4                                            |
| 12372  | Casq1    | -0.08 | 0.06  | 0.40  | 0.43  | 0.31   | 0.5209 | 0.5534 | 0.0632 | 0.2702 | 0.1947 calsequestrin 1                                           |
| 12373  | Casq2    | -0.13 | 0.02  | 0.06  | 0.73  | 0.35   | 0.4659 | 0.0987 | 0.0987 | 0.0987 | 0.0871 calsequestrin 2                                           |
| 65945  | Clsn1    | 0.49  | 0.19  | 0.58  | 1.14  | 1.41   | 0.3465 | 0.4794 | 0.2979 | 0.0247 | 0.0000 calsyntenin 1                                             |
| 65945  | Clsn1    | -0.70 | 0.12  | 0.27  | 0.36  | 0.53   | 0.4834 | 0.3784 | 0.3056 | 0.3056 | 0.0132 calsyntenin 1                                             |
| 64085  | Clsn2    | 0.52  | -0.38 | -0.01 | 0.07  | 0.35   | 0.1206 | 0.0795 | 0.5538 | 0.0176 | 0.0037 calsyntenin 2                                             |
| 64085  | Clsn2    | 0.23  | -0.40 | 0.15  | 0.57  | 0.75   | 0.5777 | 0.6233 | 0.3607 | 0.0176 | 0.0246 calsyntenin 2                                             |
| 64085  | Clsn2    | 0.04  | -0.03 | 0.06  | 0.20  | 0.20   | 0.6021 | 0.6324 | 0.5000 | 0.0498 | 0.0538 calsyntenin 3                                             |
| 232370 | Clsn3    | -0.21 | -0.17 | -0.13 | 0.03  | -0.53  | 0.5538 | 0.2719 | 0.6158 | 0.5442 | 0.0078 calumenin                                                 |
| 12321  | Calu     | -0.11 | 0.43  | 0.29  | -0.07 | 0.14   | 0.4238 | 0.0253 | 0.1650 | 0.3260 | 0.0078 calumenin                                                 |
| 12321  | Calu     | -0.02 | -0.60 | 0.18  | 0.70  | 0.92   | 0.6972 | 0.6554 | 0.3302 | 0.0238 | 0.3921 CalM kinase-like vesicle-associated                       |
| 235604 | Camkv    | 0.29  | 0.03  | 0.14  | 0.13  | 0.03   | 0.4924 | 0.4346 | 0.5222 | 0.2154 | 0.3072 CalM kinase-like vesicle-associated                       |
| 66116  | Cml1     | 0.06  | 0.07  | -0.01 | 0.00  | -0.05  | 0.6677 | 0.6471 | 0.4374 | 0.3266 | 0.3122 camello-like 1                                            |
| 66116  | Cml1     | 0.00  | -0.76 | -1.31 | 0.01  | 0.06   | 0.5422 | 0.4968 | 0.5385 | 0.3585 | 0.0000 camello-like 1                                            |
| 93673  | Cml2     | -0.14 | 0.12  | 0.11  | -0.04 | -0.03  | 0.4313 | 0.1525 | 0.2633 | 0.3846 | 0.3483 camello-like 2                                            |
| 93673  | Cml2     | -0.09 | 0.22  | 0.21  | -0.04 | -0.09  | 0.2229 | 0.1787 | 0.1830 | 0.3931 | 0.1975 camello-like 2                                            |
| 93674  | Cml3     | 0.34  | -0.55 | -0.73 | -0.55 | -0.58  | 0.4313 | 0.1525 | 0.2633 | 0.3846 | 0.0000 camello-like 3                                            |
| 68396  | Cml4     | -0.15 | -0.18 | -0.28 | -0.54 | -0.73  | 0.5501 | 0.1974 | 0.1061 | 0.0024 | 0.0001 camello-like 4                                            |
| 69049  | Cml5     | -0.03 | -0.23 | -0.24 | -0.18 | -0.24  | 0.6420 | 0.2567 | 0.2155 | 0.0378 | 0.0065 camello-like 5                                            |
| 12912  | Creb1    | 0.26  | -0.34 | -0.43 | -0.14 | -0.21  | 0.2379 | 0.0274 | 0.0353 | 0.1365 | 0.0529 cAMP responsive element binding protein 1                 |
| 12912  | Creb1    | -0.65 | -0.29 | -0.86 | -0.99 | -1.22  | 0.2738 | 0.6553 | 0.1821 | 0.0040 | 0.0001 cAMP responsive element binding protein 1                 |
| 12912  | Creb1    | -0.55 | -0.27 | -0.88 | -0.93 | -1.22  | 0.6216 | 0.0626 | 0.0726 | 0.0062 | 0.0002 cAMP responsive element binding protein 1                 |
| 12912  | Creb1    | -0.35 | -0.29 | -0.88 | -0.99 | -1.16  | 0.3023 | 0.2519 | 0.0028 | 0.0104 | 0.0001 cAMP responsive element binding protein 1                 |
| 12912  | Creb1    | -0.91 | -0.34 | -0.85 | -0.90 | -1.20  | 0.3645 | 0.5580 | 0.5412 | 0.0043 | 0.0001 cAMP responsive element binding protein 1                 |
| 12912  | Creb1    | -0.18 | -0.33 | -0.86 | -0.92 | -1.23  | 0.4599 | 0.0955 | 0.0010 | 0.0021 | 0.0000 cAMP responsive element binding protein 1                 |
| 12912  | Creb1    | -0.16 | -0.44 | -1.01 | -1.01 | -1.25  | 0.4884 | 0.0582 | 0.0008 | 0.0016 | 0.0001 cAMP responsive element binding protein 1                 |

|        |        |       |       |       |       |       |        |        |        |        |                                                                  |
|--------|--------|-------|-------|-------|-------|-------|--------|--------|--------|--------|------------------------------------------------------------------|
| 12912  | Creb1  | -0.19 | -0.35 | -0.88 | -0.96 | -1.18 | 0.4893 | 0.0755 | 0.0010 | 0.0036 | 0.0003 cAMP responsive element binding protein 1                 |
| 12912  | Creb1  | -0.09 | -0.30 | -0.31 | -0.21 | -0.18 | 0.5481 | 0.3547 | 0.3221 | 0.0370 | 0.0457 cAMP responsive element binding protein 1                 |
| 12912  | Creb1  | -0.12 | -0.34 | -0.92 | -0.97 | -1.01 | 0.5738 | 0.1950 | 0.0014 | 0.0013 | 0.0004 cAMP responsive element binding protein 1                 |
| 12912  | Creb1  | -0.12 | -0.38 | -0.96 | -0.90 | -1.22 | 0.5771 | 0.0788 | 0.0018 | 0.0029 | 0.0002 cAMP responsive element binding protein 1                 |
| 12913  | Creb1  | -0.07 | -0.38 | -0.86 | -0.98 | -1.13 | 0.6314 | 0.1084 | 0.0032 | 0.0016 | 0.0001 cAMP responsive element binding protein 1                 |
| 12913  | Creb3  | -0.78 | -0.01 | 0.26  | 0.19  | 0.40  | 0.4668 | 0.4063 | 0.2916 | 0.2291 | 0.0263 cAMP responsive element binding protein 3                 |
| 12913  | Creb3  | 0.15  | -0.21 | -0.51 | -0.59 | -0.51 | 0.5195 | 0.2406 | 0.0176 | 0.0064 | 0.0068 cAMP responsive element binding protein 3                 |
| 12913  | Creb3  | 0.02  | -0.11 | 0.38  | 0.36  | 0.43  | 0.6816 | 0.3912 | 0.0355 | 0.0426 | 0.0240 cAMP responsive element binding protein 3-like 1          |
| 260647 | Creb3  | 0.28  | -0.18 | -0.12 | 0.11  | -0.28 | 0.3985 | 0.5159 | 0.5501 | 0.3895 | 0.1223 cAMP responsive element binding protein 3-like 2          |
| 206647 | Creb3  | 0.11  | 0.00  | -0.07 | 0.10  | 0.23  | 0.5629 | 0.5552 | 0.6299 | 0.3173 | 0.0282 cAMP responsive element binding protein 3-like 2          |
| 206677 | Creb3  | 0.54  | 0.05  | 0.45  | 0.34  | -0.02 | 0.2983 | 0.6160 | 0.4424 | 0.1723 | 0.0240 cAMP responsive element binding protein 3-like 3          |
| 206774 | Creb3  | 0.04  | -0.31 | -0.54 | -0.18 | -0.23 | 0.6597 | 0.3132 | 0.0465 | 0.1749 | 0.0282 cAMP responsive element binding protein 3-like 3          |
| 231991 | Creb5  | 0.11  | -0.04 | -0.04 | 0.00  | 0.05  | 0.3622 | 0.4688 | 0.4546 | 0.5615 | 0.0547 cAMP responsive element binding protein 5                 |
| 231991 | Creb5  | 0.35  | 1.33  | 1.16  | 0.96  | 0.91  | 0.3967 | 0.0063 | 0.0118 | 0.0114 | 0.0221 cAMP responsive element binding protein 5                 |
| 231991 | Creb5  | 0.05  | 0.04  | -0.14 | 0.03  | 0.11  | 0.5391 | 0.5223 | 0.1467 | 0.4580 | 0.0015 cAMP responsive element binding protein 5                 |
| 12915  | Creb1  | 0.42  | 0.00  | -0.04 | 0.38  | 0.45  | 0.2808 | 0.5860 | 0.5457 | 0.0133 | 0.0003 cAMP responsive element binding protein 3-like 1          |
| 232430 | Creb2  | -0.32 | 0.06  | -0.86 | -1.33 | -1.41 | 0.4721 | 0.5987 | 0.0095 | 0.0028 | 0.0003 cAMP responsive element binding protein 3-like 2          |
| 12916  | Creb   | 0.34  | 0.15  | -0.20 | 0.31  | -0.19 | 0.1969 | 0.6076 | 0.2373 | 0.0197 | 0.0970 cAMP responsive element binding protein 3-like 4          |
| 12916  | Creb   | 0.36  | 0.26  | 0.10  | 0.41  | 0.11  | 0.3505 | 0.5960 | 0.5525 | 0.0162 | 0.0005 cAMP responsive element modulator                         |
| 12916  | Creb   | 0.25  | 0.04  | -0.46 | -0.10 | -0.55 | 0.3533 | 0.5834 | 0.0525 | 0.3564 | 0.0005 cAMP responsive element modulator                         |
| 12916  | Creb   | 0.13  | 0.29  | -0.01 | 0.36  | -0.08 | 0.5109 | 0.1824 | 0.6417 | 0.0077 | 0.2588 cAMP responsive element modulator                         |
| 12916  | Creb   | 0.05  | 0.00  | 0.05  | 0.07  | 0.05  | 0.5453 | 0.6426 | 0.4892 | 0.3183 | 0.0062 cAMP responsive element modulator                         |
| 12916  | Creb   | 0.03  | 0.00  | 0.05  | 0.07  | 0.05  | 0.5510 | 0.2904 | 0.4481 | 0.0775 | 0.0534 cAMP-regulated phosphoprotein 19                          |
| 59046  | Aprr19 | -1.24 | 2.04  | 0.81  | 0.20  | -0.36 | 0.1758 | 0.1755 | 0.0072 | 0.2385 | 0.0952 cAMP-regulated phosphoprotein 19                          |
| 59046  | Aprr19 | 0.38  | -0.22 | 0.13  | 0.14  | 0.22  | 0.3207 | 0.2721 | 0.5025 | 0.3336 | 0.1515 cancer antigen 1                                          |
| 71213  | Page1  | -0.03 | 0.15  | 0.14  | 0.02  | 0.08  | 0.6037 | 0.2541 | 0.2874 | 0.4920 | 0.1502 cancer susceptibility candidate 1                         |
| 320662 | Casc1  | 0.15  | 0.07  | -0.05 | 0.04  | 0.15  | 0.2175 | 0.5427 | 0.3699 | 0.3554 | 0.4320 cancer susceptibility candidate 1                         |
| 320662 | Casc1  | 0.03  | 0.16  | -0.06 | -0.06 | -0.02 | 0.6047 | 0.1578 | 0.1739 | 0.4792 | 0.4184 cancer susceptibility candidate 1                         |
| 320662 | Casc1  | 0.03  | -0.18 | -0.06 | -0.06 | -0.02 | 0.6298 | 0.1613 | 0.5534 | 0.3479 | 0.0765 cancer susceptibility candidate 1                         |
| 192160 | Casc3  | 0.02  | 0.20  | 0.20  | 0.06  | 0.13  | 0.6675 | 0.1718 | 0.0951 | 0.3445 | 0.4285 cancer susceptibility candidate 3                         |
| 319996 | Casc4  | -0.31 | 0.21  | 0.29  | 0.11  | 0.05  | 0.4450 | 0.1908 | 0.1105 | 0.4017 | 0.0063 cancer susceptibility candidate 4                         |
| 319996 | Casc4  | -0.34 | 0.09  | 0.00  | -0.37 | -0.45 | 0.2141 | 0.4445 | 0.6405 | 0.0323 | 0.0004 cancer susceptibility candidate 4                         |
| 76464  | Casc4  | 0.32  | -1.11 | -0.84 | -0.86 | -1.11 | 0.3707 | 0.0040 | 0.0031 | 0.0046 | 0.4524 cancer susceptibility candidate 5                         |
| 76464  | Casc5  | 0.10  | -0.04 | -0.04 | 0.07  | -0.07 | 0.4202 | 0.5639 | 0.5072 | 0.2779 | 0.2539 cancer susceptibility candidate 5                         |
| 70662  | Cla2   | -0.13 | 0.16  | 0.31  | 0.01  | 0.12  | 0.5257 | 0.2146 | 0.0391 | 0.5530 | 0.3411 cancer/testis antigen 2                                   |
| 246257 | Cla2   | -0.02 | 0.04  | 0.04  | -0.01 | -0.05 | 0.6549 | 0.6330 | 0.6270 | 0.5473 | 0.0002 candidate tumor suppressor OVCA2                          |
| 12801  | Cnr1   | 0.19  | -0.05 | -0.85 | -0.68 | -0.80 | 0.5585 | 0.0724 | 0.0026 | 0.0173 | 0.2513 cannabinoid receptor 1 (brain)                            |
| 12802  | Cnr2   | 0.06  | -0.57 | -0.70 | -0.42 | -0.58 | 0.7525 | 0.0037 | 0.0004 | 0.0054 | 0.0005 cannabinoid receptor 2 (macrophage)                       |
| 12802  | Cnr2   | 0.00  | -1.04 | -0.70 | -0.42 | -0.49 | 0.7020 | 0.0033 | 0.0000 | 0.0054 | 0.0059 cannabinoid receptor 2 (macrophage)                       |
| 380986 | Cnrp1  | 0.15  | -0.68 | -0.86 | -0.41 | -0.32 | 0.4444 | 0.0063 | 0.0008 | 0.0129 | 0.0600 cannabinoid receptor interacting protein 1                |
| 380986 | Cnrp1  | 0.15  | -0.05 | -0.25 | -0.08 | -0.13 | 0.5046 | 0.3575 | 0.1440 | 0.2913 | 0.4071 cannabinoid receptor interacting protein 1                |
| 380986 | Cnrp1  | -0.06 | 0.15  | 0.08  | 0.08  | 0.02  | 0.6105 | 0.5311 | 0.6358 | 0.2667 | 0.4584 cannabinoid receptor interacting protein 1                |
| 380986 | Cnrp1  | -0.01 | 0.07  | 0.02  | -0.08 | 0.05  | 0.6831 | 0.3964 | 0.5521 | 0.2852 | 0.3351 cannabinoid receptor interacting protein 1                |
| 269637 | Cnrp1  | 0.10  | -0.12 | 0.00  | 0.11  | -0.01 | 0.4648 | 0.1525 | 0.4951 | 0.2206 | 0.4371 canopy 1 homolog (zebrafish)                              |
| 56530  | Cnrp2  | 0.07  | -0.03 | -0.03 | 0.09  | -0.02 | 0.5375 | 0.4789 | 0.3904 | 0.2523 | 0.4620 canopy 1 homolog (zebrafish)                              |
| 72029  | Cnrp2  | 0.05  | -0.55 | -0.90 | -0.57 | -0.87 | 0.6587 | 0.0683 | 0.0046 | 0.0129 | 0.0002 canopy 2 homolog (zebrafish)                              |
| 72029  | Cnrp2  | -0.44 | 0.73  | 0.78  | 0.45  | 0.52  | 0.2871 | 0.0348 | 0.0114 | 0.0115 | 0.0126 canopy 3 homolog (zebrafish)                              |
| 66455  | Cnrp4  | -0.38 | 0.09  | 0.12  | 0.03  | -0.07 | 0.5206 | 0.3697 | 0.3245 | 0.5155 | 0.3739 canopy 4 homolog (zebrafish)                              |
| 66455  | Cnrp4  | 0.03  | 0.14  | -0.04 | -0.23 | -0.12 | 0.6805 | 0.5614 | 0.1566 | 0.1564 | 0.2810 canopy 4 homolog (zebrafish)                              |
| 12331  | Cap1   | 0.83  | -0.95 | -0.14 | 0.76  | 0.98  | 0.2310 | 0.0947 | 0.5482 | 0.1137 | 0.0157 CAP, adenylate cyclase-associated protein, 1 (yeast)      |
| 67252  | Cap2   | 0.18  | 0.02  | -0.07 | 0.25  | 0.35  | 0.4121 | 0.5180 | 0.3249 | 0.0720 | 0.0116 CAP, adenylate cyclase-associated protein, 2 (yeast)      |
| 67252  | Cap2   | -0.04 | 0.12  | 0.13  | -0.02 | -0.13 | 0.6484 | 0.6358 | 0.5043 | 0.5043 | 0.3814 CAP, adenylate cyclase-associated protein, 2 (yeast)      |
| 56430  | Clp1   | 0.48  | 0.59  | 1.20  | 0.65  | 1.30  | 0.1657 | 0.1288 | 0.0026 | 0.0008 | 0.0000 CAP-GLY domain containing linker protein 1                |
| 56430  | Clp1   | -0.48 | -0.78 | 1.58  | 0.05  | 1.00  | 0.2086 | 0.0077 | 0.0023 | 0.5128 | 0.0675 CAP-GLY domain containing linker protein 1                |
| 56430  | Clp1   | 0.38  | -0.02 | 0.27  | 0.82  | 1.16  | 0.3318 | 0.5614 | 0.4269 | 0.0057 | 0.0001 CAP-GLY domain containing linker protein 1                |
| 269713 | Clp2   | 0.38  | -0.19 | 0.47  | 0.46  | 0.14  | 0.3165 | 0.0219 | 0.0061 | 0.1251 | 0.2646 CAP-GLY domain containing linker protein 2                |
| 269713 | Clp2   | -0.16 | 0.62  | 0.77  | 0.56  | 0.54  | 0.3967 | 0.0071 | 0.0078 | 0.0002 | 0.0001 CAP-GLY domain containing linker protein 2                |
| 76686  | Clp3   | 0.32  | -0.34 | -0.47 | -0.10 | -0.25 | 0.1968 | 0.0327 | 0.0037 | 0.3065 | 0.0245 CAP-GLY domain containing linker protein 2                |
| 76686  | Clp3   | 0.15  | -0.32 | -0.45 | -0.20 | 0.13  | 0.5020 | 0.2193 | 0.5906 | 0.2560 | 0.2368 CAP-GLY domain containing linker protein 3                |
| 78785  | Clp4   | 0.37  | 0.02  | 0.33  | 0.52  | 0.80  | 0.2845 | 0.4849 | 0.4716 | 0.0026 | 0.0011 CAP-GLY domain containing linker protein family, member 4 |
| 78785  | Clp4   | 0.04  | 0.15  | 0.18  | -0.03 | 0.18  | 0.6528 | 0.4990 | 0.4287 | 0.5062 | 0.0668 CAP-GLY domain containing linker protein family, member 4 |
| 71722  | Cic    | -0.57 | 0.20  | 0.47  | 0.29  | 0.35  | 0.3189 | 0.2475 | 0.0805 | 0.1432 | 0.0847 capicua homolog (Drosophila)                              |
| 71722  | Cic    | -0.13 | 0.20  | 0.11  | 0.05  | -0.02 | 0.3892 | 0.3311 | 0.2388 | 0.4532 | 0.4590 capicua homolog (Drosophila)                              |
| 71722  | Cic    | -0.12 | 0.07  | 0.49  | 0.50  | 0.49  | 0.5590 | 0.3663 | 0.0127 | 0.0094 | 0.0033 capping protein (Drosophila)                              |
| 12340  | Capza1 | 0.57  | -0.46 | 0.20  | 0.56  | 0.91  | 0.2344 | 0.1264 | 0.6274 | 0.0909 |                                                                  |

|        |        |       |       |       |       |       |        |        |        |        |        |                                               |
|--------|--------|-------|-------|-------|-------|-------|--------|--------|--------|--------|--------|-----------------------------------------------|
| 58250  | Chst11 | 0.17  | 0.00  | 0.36  | 0.21  | 0.13  | 0.5653 | 0.4307 | 0.5405 | 0.1137 | 0.1659 | carbohydrate sulfotransferase 11              |
| 58250  | Chst11 | -0.04 | 0.35  | 0.33  | -0.02 | 0.12  | 0.6335 | 0.2367 | 0.1889 | 0.5060 | 0.1606 | carbohydrate sulfotransferase 11              |
| 59031  | Chst12 | -0.35 | 0.06  | 0.12  | -0.27 | -0.35 | 0.3829 | 0.6447 | 0.5946 | 0.2601 | 0.0709 | carbohydrate sulfotransferase 12              |
| 59031  | Chst12 | -0.10 | -0.05 | 0.12  | -0.39 | -0.62 | 0.6494 | 0.4971 | 0.4086 | 0.0358 | 0.0024 | carbohydrate sulfotransferase 12              |
| 54371  | Chst2  | 0.52  | -0.83 | -0.14 | 0.11  | 0.09  | 0.0690 | 0.0015 | 0.2403 | 0.3290 | 0.3286 | carbohydrate sulfotransferase 2               |
| 54371  | Chst2  | 0.14  | -0.10 | -0.02 | 0.11  | -0.03 | 0.4213 | 0.4123 | 0.5390 | 0.3971 | 0.4144 | carbohydrate sulfotransferase 2               |
| 12346  | Car1   | -0.23 | -0.20 | -0.10 | -0.21 | -0.33 | 0.4261 | 0.3164 | 0.4530 | 0.2176 | 0.0400 | carbotonic anhydrase 1                        |
| 72605  | Car1   | 0.13  | -0.09 | -0.08 | 0.02  | -0.02 | 0.3881 | 0.2992 | 0.3085 | 0.5095 | 0.4396 | carbotonic anhydrase 10                       |
| 72605  | Car1   | -0.02 | -0.04 | 0.00  | -0.08 | -0.10 | 0.6486 | 0.3961 | 0.5312 | 0.2600 | 0.1558 | carbotonic anhydrase 10                       |
| 12348  | Car1   | 0.21  | -0.06 | 0.12  | -0.03 | -0.01 | 0.4884 | 0.3704 | 0.5916 | 0.5062 | 0.4705 | carbotonic anhydrase 11                       |
| 71934  | Car1   | 0.58  | -0.32 | -0.17 | 0.19  | 0.16  | 0.0833 | 0.0967 | 0.2931 | 0.2648 | 0.1362 | carbotonic anhydrase 13                       |
| 23831  | Car4   | -1.34 | 0.84  | 0.71  | 0.02  | -0.33 | 0.0539 | 0.2851 | 0.2651 | 0.5358 | 0.0783 | carbotonic anhydrase 14                       |
| 80733  | Car5   | -0.11 | 0.20  | 0.45  | 0.20  | 0.44  | 0.4477 | 0.1663 | 0.0072 | 0.0541 | 0.0004 | carbotonic anhydrase 15                       |
| 12349  | Car2   | 0.46  | -0.15 | -0.15 | 0.22  | 0.15  | 0.2173 | 0.4949 | 0.4192 | 0.2424 | 0.0050 | carbotonic anhydrase 2                        |
| 12350  | Car3   | 1.92  | -1.50 | -1.94 | 0.70  | -0.33 | 0.2649 | 0.3007 | 0.4631 | 0.3801 | 0.4199 | carbotonic anhydrase 2                        |
| 12350  | Car3   | 1.32  | -1.50 | -1.94 | 0.34  | -0.82 | 0.3110 | 0.1419 | 0.1147 | 0.4749 | 0.2208 | carbotonic anhydrase 3                        |
| 12351  | Car4   | 0.57  | -0.35 | -0.10 | 0.25  | 0.32  | 0.2729 | 0.1830 | 0.3918 | 0.1214 | 0.0270 | carbotonic anhydrase 4                        |
| 12352  | Car5a  | 0.08  | 0.05  | 0.07  | 0.12  | 0.04  | 0.4298 | 0.5631 | 0.5048 | 0.1483 | 0.3088 | carbotonic anhydrase 5a, mitochondrial        |
| Car5b  | 0.67   | -0.47 | -0.01 | -0.04 | 0.00  | 0.12  | 0.1032 | 0.1174 | 0.6074 | 0.1501 | 0.0882 | carbotonic anhydrase 5b, mitochondrial        |
| 56078  | Car5b  | 0.09  | 0.01  | -0.04 | 0.00  | 0.02  | 0.4677 | 0.6051 | 0.5631 | 0.5626 | 0.1180 | carbotonic anhydrase 5b, mitochondrial        |
| 12353  | Car6   | -0.06 | -0.03 | -0.05 | -0.02 | -0.10 | 0.5848 | 0.4841 | 0.4741 | 0.0538 | 0.2013 | carbotonic anhydrase 6                        |
| 12354  | Car7   | -0.15 | 0.15  | 0.58  | 0.02  | -0.15 | 0.6020 | 0.5984 | 0.4267 | 0.5358 | 0.3181 | carbotonic anhydrase 7                        |
| 12319  | Car8   | -1.45 | -0.26 | -0.01 | -0.37 | -0.36 | 0.0084 | 0.4196 | 0.4494 | 0.1879 | 0.0817 | carbotonic anhydrase 8                        |
| 12319  | Car8   | 0.59  | -0.06 | -0.37 | -0.36 | -0.39 | 0.0760 | 0.2320 | 0.0298 | 0.0194 | 0.0171 | carbotonic anhydrase 8                        |
| 230099 | Car9   | 0.26  | 0.14  | 0.15  | 0.04  | 0.05  | 0.5084 | 0.5379 | 0.5369 | 0.3808 | 0.3135 | carbotonic anhydrase 9                        |
| 76459  | Car2   | 0.13  | 0.00  | -0.02 | 0.14  | 0.06  | 0.4637 | 0.5188 | 0.4256 | 0.2073 | 0.3326 | carbotonic anhydrase 12                       |
| 12408  | Car12  | 0.07  | -0.15 | -0.03 | -0.03 | -0.03 | 0.5168 | 0.3210 | 0.6389 | 0.4728 | 0.4331 | carbotonic anhydrase 12                       |
| 12408  | Car1   | 2.29  | -0.39 | -0.85 | -0.23 | -1.03 | 0.0066 | 0.2022 | 0.0119 | 0.3562 | 0.0001 | carbotonyl reductase 1                        |
| 12409  | Car2   | 0.12  | -0.19 | -0.48 | -0.06 | -0.07 | 0.5204 | 0.4251 | 0.0829 | 0.4261 | 0.3808 | carbotonyl reductase 2                        |
| 109857 | Car3   | 0.77  | 0.47  | -0.05 | 0.50  | 0.82  | 0.1113 | 0.2443 | 0.3857 | 0.0703 | 0.0016 | carbotonyl reductase 3                        |
| 234309 | Car4   | 0.17  | -0.53 | -0.74 | -0.42 | -0.52 | 0.4624 | 0.0394 | 0.0091 | 0.0573 | 0.0019 | carbotonyl reductase 4                        |
| 12613  | Cel    | -0.35 | 0.44  | 0.32  | -0.13 | -0.34 | 0.3038 | 0.0966 | 0.1317 | 0.3879 | 0.0607 | carboxyl ester lipase                         |
| 12623  | Ces1   | 0.30  | -0.12 | 0.01  | -0.06 | 0.04  | 0.2405 | 0.2529 | 0.5119 | 0.3177 | 0.3605 | carboxyl esterase 1                           |
| 12623  | Ces1   | 0.14  | 0.04  | 0.25  | -0.07 | 0.05  | 0.5921 | 0.3873 | 0.1867 | 0.4194 | 0.3824 | carboxyl esterase 1                           |
| 234671 | Ces2   | 0.05  | -0.02 | 0.07  | 0.09  | 0.08  | 0.5753 | 0.5957 | 0.4803 | 0.2567 | 0.1883 | carboxyl esterase 2                           |
| 234671 | Ces2   | -0.03 | 0.00  | -0.05 | -0.08 | -0.04 | 0.6269 | 0.6013 | 0.4374 | 0.2571 | 0.3457 | carboxyl esterase 2                           |
| 104158 | Ces3   | 0.51  | -0.62 | -0.16 | -0.05 | 0.12  | 0.1892 | 0.0866 | 0.4195 | 0.4757 | 0.2834 | carboxyl esterase 3                           |
| 234673 | Ces5   | 0.15  | 0.04  | 0.16  | 0.09  | 0.08  | 0.3516 | 0.6416 | 0.4692 | 0.2661 | 0.2369 | carboxyl esterase 5                           |
| 234673 | Ces5   | 0.16  | 0.17  | -0.01 | -0.06 | -0.14 | 0.4918 | 0.5721 | 0.4428 | 0.4712 | 0.2078 | carboxyl esterase 5                           |
| 102022 | Ces6   | 0.27  | -0.06 | -0.02 | 0.13  | -0.05 | 0.4324 | 0.3519 | 0.3639 | 0.1965 | 0.3838 | carboxyl esterase 6                           |
| 67935  | Ces7   | -0.10 | -0.02 | 0.04  | -0.02 | 0.01  | 0.4078 | 0.6378 | 0.4072 | 0.4949 | 0.4595 | carboxyl esterase 7                           |
| 67935  | Ces7   | 0.04  | 0.02  | 0.07  | -0.03 | -0.07 | 0.6097 | 0.5199 | 0.6416 | 0.4391 | 0.2806 | carboxyl esterase 7                           |
| 69574  | Cmb1   | -0.21 | -0.63 | -1.22 | -0.68 | -1.36 | 0.5606 | 0.3947 | 0.0820 | 0.0041 | 0.4893 | carboxymethylglutaminylase-like (Pseudomonas) |
| 109897 | Cpa1   | 0.03  | 0.26  | -0.03 | -0.02 | 0.00  | 0.6358 | 0.4768 | 0.4378 | 0.4945 | 0.0000 | carboxypeptidase A1                           |
| 232680 | Cpa2   | 0.02  | 0.27  | 0.12  | 0.08  | 0.06  | 0.6587 | 0.0797 | 0.3605 | 0.3353 | 0.3042 | carboxypeptidase A2, pancreatic               |
| 12873  | Cpa3   | 0.69  | -0.17 | -0.13 | 0.30  | 0.15  | 0.0107 | 0.4508 | 0.4383 | 0.0955 | 0.1519 | carboxypeptidase A3, mast cell                |
| 71791  | Cpa4   | -0.07 | -0.03 | -0.09 | 0.00  | -0.02 | 0.5491 | 0.3796 | 0.2250 | 0.5501 | 0.4232 | carboxypeptidase A4                           |
| 74649  | Cpa5   | -0.06 | 0.06  | -0.05 | -0.10 | -0.06 | 0.5438 | 0.3967 | 0.4791 | 0.2912 | 0.3181 | carboxypeptidase A5                           |
| 329093 | Cpa6   | 0.09  | -0.09 | -0.05 | -0.06 | 0.02  | 0.4188 | 0.2775 | 0.4947 | 0.3352 | 0.4404 | carboxypeptidase A6                           |
| 76703  | Cpb1   | 0.12  | -0.10 | -0.22 | -0.08 | 0.03  | 0.5514 | 0.4611 | 0.0895 | 0.4276 | 0.4422 | carboxypeptidase B1 (tissue)                  |
| 56373  | Cpb2   | 0.13  | -0.10 | -0.12 | -0.01 | 0.03  | 0.3345 | 0.3148 | 0.1540 | 0.5270 | 0.4747 | carboxypeptidase B2 (plasma)                  |
| 56373  | Cpb2   | 0.10  | 0.23  | 0.13  | 0.09  | 0.01  | 0.6225 | 0.6469 | 0.5609 | 0.4973 | 0.4860 | carboxypeptidase B2 (plasma)                  |
| 12874  | Cpd    | -0.51 | -0.23 | 0.01  | -0.31 | -0.56 | 0.4540 | 0.5508 | 0.3770 | 0.1188 | 0.0168 | carboxypeptidase D                            |
| 12874  | Cpd    | -0.37 | -0.21 | 0.21  | -0.26 | -0.23 | 0.5020 | 0.5073 | 0.2927 | 0.1408 | 0.1503 | carboxypeptidase D                            |
| 12876  | Cpe    | -0.13 | 0.31  | 0.50  | 0.40  | 0.33  | 0.5484 | 0.4776 | 0.2295 | 0.1329 | 0.0572 | carboxypeptidase E                            |
| 12876  | Cpe    | 0.03  | 0.09  | -0.03 | 0.16  | -0.09 | 0.6699 | 0.6415 | 0.4544 | 0.3056 | 0.3411 | carboxypeptidase E                            |
| 70574  | Cpm    | 0.46  | -0.01 | -0.28 | 0.27  | 0.43  | 0.3186 | 0.4584 | 0.1740 | 0.0648 | 0.0012 | carboxypeptidase M                            |
| 93721  | Cpn1   | 0.41  | -0.13 | -0.24 | 0.22  | 0.40  | 0.1866 | 0.2772 | 0.3699 | 0.1061 | 0.0423 | carboxypeptidase N, polypeptide 1             |
| 93721  | Cpn1   | -0.06 | -0.14 | -0.14 | -0.13 | -0.15 | 0.5519 | 0.4271 | 0.3699 | 0.1061 | 0.0340 | carboxypeptidase N, polypeptide 1             |
| 71756  | Cpn2   | -0.02 | 0.03  | 0.05  | 0.19  | 0.12  | 0.6416 | 0.4335 | 0.2989 | 0.3302 | 0.2391 | carboxypeptidase N, polypeptide 2             |
| 56264  | Cpxm1  | 0.87  | 0.87  | 0.56  | -0.45 | -0.31 | 0.1291 | 0.5163 | 0.1276 | 0.1370 | 0.2285 | carboxypeptidase X 1 (M14 family)             |
| 55887  | Cpxm2  | -0.60 | 0.15  | -0.22 | 0.34  | 0.03  | 0.2920 | 0.1170 | 0.2091 | 0.2101 | 0.4164 | carboxypeptidase X 2 (M14 family)             |
| 55887  | Cpxm2  | -0.07 | 0.05  | -0.03 | -0.07 | -0.04 | 0.4677 | 0.4769 | 0.5072 | 0.2758 | 0.3049 | carboxypeptidase X 2 (M14 family)             |
| 55887  | Cpxm2  | 0.05  | 0.27  | 0.12  | 0.24  | 0.00  | 0.5924 | 0.0571 | 0.3918 | 0.2102 | 0.4906 | carboxypeptidase X 2 (M14 family)             |
| 242939 | Cpz    | -0.06 | -0.11 | 0.13  | 0.07  | 0.26  | 0.5710 | 0.3489 | 0.4004 | 0.3960 | 0.0183 | carboxypeptidase Z                            |
| 242939 | Cpz    | -0.02 | -0.05 | 0.04  | 0.18  | 0.20  | 0.6489 | 0.5857 | 0.4446 | 0.0928 | 0.0271 | carboxypeptidase Z                            |
| 71287  | Cplv   | 0.05  | -0.03 | 0.07  | -0.03 | 0.05  | 0.5677 | 0.6266 | 0.3753 | 0.4618 | 0.2860 | carboxypeptidase Z, vitellogenic-like         |
| 66586  | Crls1  | 0.18  | -0.60 | -0.25 | 0.16  | 0.24  | 0.6126 | 0.5328 | 0.5836 | 0.2566 | 0.0947 | cardiolipin synthase 1                        |
| 76469  | Crya5  | -0.8  |       |       |       |       |        |        |        |        |        |                                               |

|        |         |       |       |       |       |       |        |        |        |                                     |                                                                                |
|--------|---------|-------|-------|-------|-------|-------|--------|--------|--------|-------------------------------------|--------------------------------------------------------------------------------|
| 12895  | Opi1b   | -1.05 | 0.64  | 0.45  | 0.10  | -0.39 | 0.2029 | 0.1166 | 0.2265 | 0.5143                              | 0.1510 camiline palmitoyltransferase 1b, muscle                                |
| 12895  | Opi1b   | 0.06  | -0.04 | 0.10  | 0.26  | -0.01 | 0.6313 | 0.3970 | 0.6078 | 0.2278                              | 0.4860 camiline palmitoyltransferase 1b, muscle                                |
| 78070  | Opi1c   | -0.28 | -0.12 | -0.26 | 0.01  | -0.08 | 0.4473 | 0.5486 | 0.6226 | 0.5368                              | 0.3096 camiline palmitoyltransferase 1c                                        |
| 12896  | Opi2    | 0.02  | -0.04 | -0.03 | 0.01  | -0.07 | 0.6727 | 0.5075 | 0.5341 | 0.5434                              | 0.2575 camiline palmitoyltransferase 1c                                        |
| 338403 | Cndp1   | -0.01 | -0.86 | -1.04 | -0.55 | -0.94 | 0.4397 | 0.0068 | 0.0067 | 0.0389                              | 0.0001 camiline palmitoyltransferase 2                                         |
| 27220  | Carpi1  | 0.35  | -0.22 | 0.06  | 0.03  | -0.06 | 0.6909 | 0.5878 | 0.6436 | 0.4260                              | 0.3703 carnosine dipeptidase 1 (metallopeptidase M20 family)                   |
| 27220  | Carpi1  | 0.14  | 0.06  | 0.08  | 0.12  | 0.15  | 0.2373 | 0.1222 | 0.1506 | 0.3249                              | 0.0779 CART prepropeptide                                                      |
| 72832  | Ctrac1  | -0.07 | -0.05 | -0.02 | -0.07 | -0.08 | 0.4671 | 0.5581 | 0.5990 | 0.2630                              | 0.0687 CART prepropeptide                                                      |
| 72832  | Ctrac1  | -0.04 | 0.01  | -0.03 | 0.04  | -0.06 | 0.6453 | 0.6057 | 0.6290 | 0.3783                              | 0.2802 cartilage acidic protein 1                                              |
| 56693  | Cripap  | 0.59  | -0.64 | -0.18 | 0.16  | 0.18  | 0.1372 | 0.0189 | 0.2288 | 0.3610                              | 0.3874 cartilage acidic protein 1                                              |
| 68709  | Crip2   | -0.06 | 0.19  | 0.21  | 0.24  | 0.00  | 0.6627 | 0.6309 | 0.6415 | 0.3569                              | 0.2858 cartilage associated protein                                            |
| 214425 | Crip    | 0.03  | 0.03  | 0.12  | 0.54  | 0.50  | 0.1353 | 0.5812 | 0.5528 | 0.0485                              | 0.4907 cartilage intermediate layer protein 2                                  |
| 12895  | Casd1   | 0.05  | 0.27  | 0.69  | 0.25  | 0.07  | 0.6542 | 0.2460 | 0.3140 | 0.3144                              | 0.0433 cartilage intermediate layer protein, nucleotide pyrophosphatohydrolase |
| 213819 | Casd1   | 0.11  | -0.45 | -0.58 | -0.25 | -0.59 | 0.5215 | 0.0743 | 0.0122 | 0.1233                              | 0.4201 cartilage oligomeric matrix protein                                     |
| 12990  | Cas1s1  | 0.05  | -0.02 | 0.05  | -0.04 | 0.05  | 0.5558 | 0.4990 | 0.6150 | 0.4328                              | 0.0004 CAS1 domain containing 1                                                |
| 12992  | Cas1s2a | 0.07  | -0.04 | 0.02  | 0.05  | 0.03  | 0.4713 | 0.5654 | 0.5233 | 0.3579                              | 0.4794 casein alpha s1                                                         |
| 12992  | Cas1s2b | 0.13  | 0.02  | -0.06 | 0.08  | 0.09  | 0.3444 | 0.6545 | 0.4049 | 0.2151                              | 0.4121 casein alpha s2-like A                                                  |
| 12992  | Cas1s2b | 0.06  | -0.01 | 0.06  | 0.00  | -0.07 | 0.5912 | 0.4321 | 0.5507 | 0.5620                              | 0.1841 casein alpha s2-like B                                                  |
| 12991  | Csn2    | 0.02  | 0.08  | -0.52 | 0.01  | 0.00  | 0.6529 | 0.5310 | 0.3865 | 0.5417                              | 0.2135 casein alpha s2-like B                                                  |
| 12994  | Csn3    | -0.03 | 0.04  | -0.02 | 0.07  | -0.02 | 0.6521 | 0.5461 | 0.5534 | 0.4072                              | 0.4920 casein beta                                                             |
| 93887  | Csnk1a1 | -0.40 | 0.27  | 0.21  | -0.08 | -0.27 | 0.1673 | 0.4586 | 0.4507 | 0.3552                              | 0.4484 casein kappa                                                            |
| 93887  | Csnk1a1 | -0.75 | 0.56  | 0.56  | -0.94 | -1.22 | 0.3877 | 0.4826 | 0.5524 | 0.0132                              | 0.0581 casein kinase 1, alpha 1                                                |
| 93887  | Csnk1a1 | 0.05  | 0.79  | 0.48  | -0.34 | -0.07 | 0.4211 | 0.1227 | 0.1481 | 0.1159                              | 0.0021 casein kinase 1, alpha 1                                                |
| 93887  | Csnk1a1 | 0.15  | 0.37  | 0.16  | 0.16  | 0.28  | 0.5120 | 0.4006 | 0.3101 | 0.2007                              | 0.4056 casein kinase 1, alpha 1                                                |
| 93887  | Csnk1a1 | 0.80  | 0.88  | 0.88  | -0.32 | 0.11  | 0.6274 | 0.2870 | 0.1997 | 0.0658                              | 0.0808 casein kinase 1, alpha 1                                                |
| 104318 | Csnk1d  | 0.42  | 0.97  | 2.04  | 1.20  | 1.62  | 0.2274 | 0.0066 | 0.0005 | 0.0000                              | 0.3253 casein kinase 1, alpha 1                                                |
| 104318 | Csnk1d  | -0.62 | 1.24  | 2.26  | 1.61  | 1.97  | 0.3992 | 0.0286 | 0.0022 | 0.0000                              | 0.0000 casein kinase 1, delta                                                  |
| 104318 | Csnk1d  | 0.29  | 0.71  | 0.59  | 0.10  | -0.09 | 0.4016 | 0.0205 | 0.0262 | 0.4393                              | 0.3891 casein kinase 1, delta                                                  |
| 27373  | Csnk1e  | 0.11  | 0.04  | 0.15  | 0.27  | 0.30  | 0.4012 | 0.5560 | 0.2949 | 0.0128                              | 0.1752 casein kinase 1, delta                                                  |
| 27373  | Csnk1e  | 0.43  | 0.61  | 0.36  | -0.04 | -0.21 | 0.5860 | 0.2113 | 0.2627 | 0.5348                              | 0.0072 casein kinase 1, epsilon                                                |
| 214897 | Csnk1g1 | -0.10 | 0.14  | -0.03 | 0.02  | 0.07  | 0.5596 | 0.6036 | 0.4496 | 0.5020                              | 0.2821 casein kinase 1, epsilon                                                |
| 214897 | Csnk1g1 | -0.07 | -0.18 | -0.26 | -0.17 | -0.47 | 0.6105 | 0.2033 | 0.1738 | 0.2461                              | 0.3324 casein kinase 1, gamma 1                                                |
| 214897 | Csnk1g1 | 0.00  | 0.09  | -0.01 | -0.02 | 0.00  | 0.6971 | 0.4756 | 0.5016 | 0.4677                              | 0.0160 casein kinase 1, gamma 1                                                |
| 103236 | Csnk1g2 | -0.84 | 0.62  | 0.08  | -0.49 | -0.82 | 0.1206 | 0.1157 | 0.4280 | 0.0765                              | 0.4919 casein kinase 1, gamma 1                                                |
| 103236 | Csnk1g2 | 0.00  | 0.08  | -0.03 | 0.22  | 0.20  | 0.7008 | 0.5848 | 0.5575 | 0.2959                              | 0.0041 casein kinase 1, gamma 2                                                |
| 70425  | Csnk1g3 | 0.03  | -0.12 | 0.03  | -0.04 | 0.16  | 0.6790 | 0.5888 | 0.3940 | 0.4437                              | 0.0883 casein kinase 1, gamma 2                                                |
| 70425  | Csnk1g3 | 0.34  | -0.45 | -0.23 | -0.24 | 0.00  | 0.4251 | 0.4666 | 0.4495 | 0.1753                              | 0.0081 casein kinase 1, gamma 3                                                |
| 12995  | Csnk2a1 | 0.14  | 0.12  | -0.02 | 0.01  | 0.15  | 0.4483 | 0.6359 | 0.4758 | 0.5211                              | 0.1762 casein kinase 1, gamma 3                                                |
| 12995  | Csnk2a1 | 0.02  | -0.08 | -0.62 | -0.63 | -1.07 | 0.6855 | 0.5590 | 0.7071 | 0.0079                              | 0.4874 casein kinase 2, alpha 1 polypeptide                                    |
| 13000  | Csnk2a2 | 0.13  | -0.06 | 0.43  | 0.19  | 0.47  | 0.4978 | 0.3224 | 0.0876 | 0.1420                              | 0.2187 casein kinase 2, alpha 1 polypeptide                                    |
| 13001  | Csnk2b  | -0.11 | -0.20 | -0.18 | -0.38 | -0.56 | 0.5672 | 0.2838 | 0.2289 | 0.0204                              | 0.0199 casein kinase 2, alpha prime polypeptide                                |
| 270166 | Cpx     | 0.38  | 0.17  | 0.50  | 0.46  | 0.89  | 0.2619 | 0.6536 | 0.2289 | 0.0204                              | 0.0023 casein kinase 2, beta polypeptide                                       |
| 270166 | Cpx     | 0.05  | -0.15 | -0.21 | -0.08 | -0.01 | 0.6433 | 0.5108 | 0.3847 | 0.4011                              | 0.0000 caseinolytic peptidase X (E. coli)                                      |
| 53895  | Cip     | -0.19 | 0.41  | -0.35 | -0.68 | -0.71 | 0.5444 | 0.3930 | 0.0755 | 0.0314                              | 0.0135 caseinolytic peptidase X (E. coli)                                      |
| 12402  | Cbl     | 0.22  | -0.14 | 0.10  | 0.02  | 0.15  | 0.2415 | 0.2515 | 0.5556 | 0.4782                              | 0.0535 casitas B-lineage lymphoma                                              |
| 12402  | Cbl     | 0.12  | 0.29  | 0.34  | 0.16  | 0.42  | 0.5477 | 0.4347 | 0.3167 | 0.1729                              | 0.0011 casitas B-lineage lymphoma                                              |
| 208650 | Cblb    | -0.10 | 0.50  | 0.47  | -0.17 | 0.05  | 0.6189 | 0.3945 | 0.3997 | 0.1844                              | 0.3946 casitas B-lineage lymphoma b                                            |
| 208650 | Cblb    | -0.01 | -0.04 | 0.03  | -0.03 | 0.01  | 0.6846 | 0.5541 | 0.5432 | 0.4346                              | 0.4748 casitas B-lineage lymphoma b                                            |
| 80794  | Cblc    | 0.48  | -0.04 | 0.21  | 0.45  | 0.63  | 0.3969 | 0.6370 | 0.0194 | 0.0022 casitas B-lineage lymphoma c |                                                                                |
| 80794  | Cblc    | 0.09  | 0.13  | 0.31  | 0.06  | 0.01  | 0.6009 | 0.6382 | 0.4842 | 0.4692                              | 0.4818 casitas B-lineage lymphoma c                                            |
| 104336 | Cbl1    | 1.00  | 1.02  | 1.01  | -0.11 | 0.12  | 0.1992 | 0.0683 | 0.0321 | 0.4367                              | 0.3740 casitas B-lineage lymphoma-like 1                                       |
| 104336 | Cbl1    | -0.29 | -0.34 | -0.29 | -0.40 | -0.27 | 0.3436 | 0.3115 | 0.3663 | 0.0121                              | 0.0579 casitas B-lineage lymphoma-like 1                                       |
| 286932 | Caskin1 | -0.05 | -0.03 | 0.05  | 0.03  | 0.02  | 0.5873 | 0.6273 | 0.4696 | 0.4923                              | 0.4228 CASK interacting protein 1                                              |
| 286932 | Caskin2 | -0.03 | -0.02 | -0.08 | -0.03 | -0.08 | 0.6196 | 0.6270 | 0.3854 | 0.4860                              | 0.2207 CASK interacting protein 1                                              |
| 140721 | Crad    | -0.04 | 0.12  | 0.30  | 0.44  | 0.49  | 0.6605 | 0.5604 | 0.2657 | 0.0067                              | 0.0063 cask-interacting protein 2                                              |
| 12905  | Crad    | 0.07  | 0.13  | 0.19  | 0.38  | 0.16  | 0.5873 | 0.6030 | 0.4622 | 0.0073                              | 0.2744 CASP2 and RIPK1 domain containing adaptor with death domain             |
| 12633  | Cflar   | -0.55 | -0.63 | -0.66 | -0.66 | -0.78 | 0.4198 | 0.5542 | 0.5186 | 0.0008                              | 0.0006 CASP8 and FADD-like apoptosis regulator                                 |
| 12633  | Cflar   | -0.13 | -0.12 | 0.05  | -0.02 | 0.01  | 0.4223 | 0.4946 | 0.6219 | 0.4819                              | 0.4647 CASP8 and FADD-like apoptosis regulator                                 |
| 12633  | Cflar   | 0.13  | 0.21  | -0.37 | 0.24  | 0.64  | 0.4556 | 0.3574 | 0.1540 | 0.0402                              | 0.0009 CASP8 and FADD-like apoptosis regulator                                 |
| 12633  | Cflar   | -0.21 | -0.32 | -0.24 | -0.15 | 0.17  | 0.4889 | 0.5059 | 0.6061 | 0.2701                              | 0.1805 CASP8 and FADD-like apoptosis regulator                                 |
| 12633  | Cflar   | 0.91  | 0.54  | 1.93  | 0.70  | 0.95  | 0.5413 | 0.0969 | 0.0082 | 0.0004                              | 0.0000 CASP8 and FADD-like apoptosis regulator                                 |
| 12633  | Casp1   | 1.59  | 1.93  | 1.93  | 1.74  | 1.66  | 0.6372 | 0.0064 | 0.0015 | 0.0000                              | 0.0000 CASP8 and FADD-like apoptosis regulator                                 |
| 12632  | Casp12  | -0.19 | -0.86 | -0.71 | -0.33 | -0.27 | 0.6385 | 0.5229 | 0.5732 | 0.2359                              | 0.2243 caspase 1                                                               |
| 12632  | Casp12  | 0.37  | -0.52 | -0.60 | -0.35 | -0.52 | 0.0121 | 0.0195 | 0.0121 | 0.0195                              | 0.0001 caspase 12                                                              |
| 12636  | Casp14  | 0.04  | -0.06 | -0.03 | 0.01  | 0.05  | 0.5688 | 0.4416 | 0.5289 | 0.5326                              | 0.3011 caspase 14                                                              |
| 12666  | Casp2   | -0.61 | -0.83 | -0.50 | -0.53 | -0.33 | 0.4439 | 0.5211 | 0.6353 | 0.0042                              | 0.0167 caspase 2                                                               |
| 12667  | Casp3   | 0.18  | -0.11 | -0.09 | -0.02 | 0.11  | 0.1862 | 0.3186 | 0.4135 | 0.5047                              | 0.1360 caspase 2                                                               |
| 12667  | Casp3   | -0.21 | -0.13 | 0.09  | 0.03  | 0.16  | 0.3041 | 0.1794 | 0.6145 | 0.4682                              | 0.0764 caspase 3                                                               |
| 12667  | Casp3   | 0.20  | 0.04  | 0.17  | -0.18 | -0.04 | 0.3134 | 0.4275 | 0.1298 | 0.0916                              | 0.3940 caspase 3                                                               |

|        |          |       |       |       |       |       |        |        |        |                                                                        |                                                       |
|--------|----------|-------|-------|-------|-------|-------|--------|--------|--------|------------------------------------------------------------------------|-------------------------------------------------------|
| 239319 | Card6    | 0.02  | -0.75 | -1.00 | -0.75 | -0.55 | 0.0050 | 0.0004 | 0.0118 | 0.0176 caspase recruitment domain family, member 6                     |                                                       |
| 69743  | Cas2.1   | -0.55 | 0.35  | 0.38  | -0.33 | -0.24 | 0.0612 | 0.0498 | 0.1713 | 0.1673 castor homolog 1, zinc finger (Drosophila)                      |                                                       |
| 69743  | Cas2.1   | 0.06  | 0.91  | 0.95  | 0.81  | 1.08  | 0.0219 | 0.0009 | 0.0017 | 0.0017 castor homolog 1, zinc finger (Drosophila)                      |                                                       |
| 330409 | Ceoz2    | 0.23  | -0.16 | 0.01  | 0.31  | 0.38  | 0.3342 | 0.5927 | 0.0158 | 0.0041 cat eye syndrome chromosome region, candidate 2 homolog (human) |                                                       |
| 330409 | Ceoz2    | 0.13  | -0.18 | 0.19  | 0.32  | 0.36  | 0.1941 | 0.1030 | 0.0225 | 0.0043 cat eye syndrome chromosome region, candidate 2 homolog (human) |                                                       |
| 214832 | Ceoz5    | 0.23  | 0.05  | 0.05  | 0.37  | 0.30  | 0.6263 | 0.5897 | 0.0091 | 0.0081 cat eye syndrome chromosome region, candidate 5 homolog (human) |                                                       |
| 214832 | Ceoz5    | 0.00  | 0.07  | 0.05  | 0.02  | 0.03  | 0.6982 | 0.5544 | 0.2374 | 0.4569 cat eye syndrome chromosome region, candidate 5 homolog (human) |                                                       |
| 94047  | Ceoz6    | 0.15  | -0.17 | -0.16 | 0.06  | 0.02  | 0.3368 | 0.2605 | 0.3808 | 0.4513 cat eye syndrome chromosome region, candidate 6 homolog (human) |                                                       |
| 12359  | Cat      | 0.01  | -0.40 | -0.40 | 0.40  | -0.09 | 0.7031 | 0.5375 | 0.0877 | 0.3895 catalse                                                         |                                                       |
| 12846  | Cont     | 0.25  | -0.27 | -0.03 | 0.01  | -0.23 | 0.6484 | 0.5886 | 0.5578 | 0.2613 catechol-O-methyltransferase                                    |                                                       |
| 69156  | Ctmd1    | -0.47 | 0.41  | -0.13 | -0.74 | -1.28 | 0.3618 | 0.3048 | 0.0095 | 0.0003 catechol-O-methyltransferase domain containing 1                |                                                       |
| 12385  | Ctmd1    | -0.25 | 0.19  | 0.19  | 0.26  | 0.09  | 0.4983 | 0.1920 | 0.2825 | 0.3994 calennin (cadherin associated protein), alpha 1                 |                                                       |
| 12385  | Ctmd1    | 0.22  | -0.48 | 0.11  | 0.33  | 0.43  | 0.5096 | 0.6256 | 0.2118 | 0.0675 calennin (cadherin associated protein), alpha 1                 |                                                       |
| 12386  | Ctmd2    | 0.09  | -0.08 | -0.05 | 0.03  | 0.02  | 0.4886 | 0.3191 | 0.3879 | 0.4311 calennin (cadherin associated protein), alpha 2                 |                                                       |
| 12386  | Ctmd2    | 0.04  | -0.03 | -0.05 | 0.15  | 0.13  | 0.6196 | 0.6456 | 0.0787 | 0.0778 calennin (cadherin associated protein), alpha 2                 |                                                       |
| 12386  | Ctmd2    | 0.03  | -0.01 | -0.04 | 0.09  | 0.07  | 0.6219 | 0.5799 | 0.3882 | 0.2888 calennin (cadherin associated protein), alpha 2                 |                                                       |
| 216033 | Ctmd3    | 0.04  | 0.06  | -0.01 | 0.11  | 0.01  | 0.5880 | 0.4607 | 0.1238 | 0.4515 calennin (cadherin associated protein), alpha 3                 |                                                       |
| 54366  | Ctmd1    | 0.02  | -0.05 | -0.04 | -0.04 | -0.04 | 0.6253 | 0.3566 | 0.4100 | 0.3277 calennin (cadherin associated protein), alpha 3                 |                                                       |
| 54366  | Ctmd1    | 0.17  | 0.61  | 0.12  | 0.23  | 0.47  | 0.2613 | 0.3470 | 0.4198 | 0.0013 calennin (cadherin associated protein), alpha-like 1            |                                                       |
| 54366  | Ctmd1    | 0.15  | -0.61 | -0.71 | -0.29 | -0.41 | 0.4882 | 0.0052 | 0.0157 | 0.2403 calennin (cadherin associated protein), alpha-like 1            |                                                       |
| 54366  | Ctmd1    | -0.13 | 0.20  | 0.30  | -0.07 | 0.12  | 0.4943 | 0.1288 | 0.0705 | 0.0766 calennin (cadherin associated protein), alpha-like 1            |                                                       |
| 12387  | Ctmd1    | 0.01  | 0.12  | 0.12  | 0.09  | 0.13  | 0.6735 | 0.4483 | 0.2841 | 0.0120 calennin (cadherin associated protein), beta 1                  |                                                       |
| 12387  | Ctmd1    | 0.78  | -0.78 | -0.33 | 0.73  | 0.82  | 0.1926 | 0.1567 | 0.3587 | 0.0074 calennin (cadherin associated protein), beta 1                  |                                                       |
| 12387  | Ctmd1    | 0.65  | -0.74 | -0.25 | 0.66  | 0.76  | 0.2153 | 0.2228 | 0.4395 | 0.0161 calennin (cadherin associated protein), beta 1                  |                                                       |
| 12387  | Ctmd1    | 0.66  | -0.74 | -0.23 | 0.60  | 0.71  | 0.2415 | 0.1750 | 0.4833 | 0.0056 calennin (cadherin associated protein), beta 1                  |                                                       |
| 12387  | Ctmd1    | 0.63  | -0.66 | -0.23 | 0.67  | 0.71  | 0.2516 | 0.2077 | 0.4922 | 0.0114 calennin (cadherin associated protein), beta 1                  |                                                       |
| 12387  | Ctmd1    | 0.59  | -0.58 | -0.08 | 0.70  | 0.88  | 0.2649 | 0.2162 | 0.5923 | 0.0092 calennin (cadherin associated protein), beta 1                  |                                                       |
| 12387  | Ctmd1    | 0.62  | -0.59 | -0.15 | 0.70  | 0.90  | 0.2896 | 0.2127 | 0.5417 | 0.0124 calennin (cadherin associated protein), beta 1                  |                                                       |
| 12387  | Ctmd1    | 0.54  | -0.60 | -0.14 | 0.70  | 0.84  | 0.2954 | 0.2237 | 0.5544 | 0.0084 calennin (cadherin associated protein), beta 1                  |                                                       |
| 12387  | Ctmd1    | 0.59  | -0.54 | -0.05 | 0.62  | 0.91  | 0.2983 | 0.2536 | 0.5897 | 0.0084 calennin (cadherin associated protein), beta 1                  |                                                       |
| 12387  | Ctmd1    | 0.54  | -0.70 | -0.13 | 0.59  | 0.78  | 0.3059 | 0.2008 | 0.5659 | 0.0182 calennin (cadherin associated protein), beta 1                  |                                                       |
| 12387  | Ctmd1    | 0.49  | -0.63 | -0.10 | 0.61  | 0.83  | 0.3150 | 0.2627 | 0.6086 | 0.0121 calennin (cadherin associated protein), beta 1                  |                                                       |
| 12387  | Ctmd1    | 0.33  | -0.45 | -0.08 | 0.17  | 0.13  | 0.3203 | 0.1088 | 0.4612 | 0.1897                                                                 | 0.1937 calennin (cadherin associated protein), beta 1 |
| 12387  | Ctmd1    | -0.10 | 0.24  | 0.60  | 0.15  | 0.24  | 0.6108 | 0.4868 | 0.1546 | 0.3010 calennin (cadherin associated protein), beta 1                  |                                                       |
| 12388  | Ctmd1    | 0.72  | -0.39 | 0.15  | 1.00  | 1.13  | 0.2248 | 0.3999 | 0.5280 | 0.0008 calennin (cadherin associated protein), delta 1                 |                                                       |
| 12388  | Ctmd1    | 0.15  | -0.02 | 0.03  | -0.03 | 0.10  | 0.4442 | 0.4442 | 0.5305 | 0.2118 calennin (cadherin associated protein), delta 1                 |                                                       |
| 12388  | Ctmd1    | -0.08 | 0.00  | -0.03 | -0.12 | -0.13 | 0.4661 | 0.1980 | 0.5973 | 0.0015 calennin (cadherin associated protein), delta 1                 |                                                       |
| 18163  | Ctmd2    | 0.36  | -0.03 | 0.33  | 0.29  | 0.38  | 0.3485 | 0.6190 | 0.5404 | 0.0015 calennin (cadherin associated protein), delta 1                 |                                                       |
| 18163  | Ctmd2    | 0.61  | 0.53  | 0.06  | 0.61  | 0.88  | 0.6282 | 0.1946 | 0.4839 | 0.0015 calennin (cadherin associated protein), delta 1                 |                                                       |
| 67087  | Ctmd1p1  | -0.28 | -0.09 | 0.52  | 0.31  | -0.16 | 0.4268 | 0.1733 | 0.4104 | 0.4922 calennin (cadherin associated protein), delta 2                 |                                                       |
| 66642  | Ctmd1    | 0.18  | 0.01  | 0.15  | 0.42  | 0.64  | 0.5585 | 0.5577 | 0.6069 | 0.2511 calennin beta interacting protein 1                             |                                                       |
| 66642  | Ctmd1    | 0.01  | 0.20  | 0.26  | 0.20  | 0.26  | 0.7009 | 0.6284 | 0.5775 | 0.0203 calennin, beta like 1                                           |                                                       |
| 12796  | Camp     | 0.11  | 2.50  | 1.65  | -0.70 | -0.46 | 0.1853 | 0.0119 | 0.0021 | 0.1360 calennin, beta like 1                                           |                                                       |
| 17066  | Cts3     | -1.18 | -0.11 | -0.07 | 0.02  | 0.02  | 0.3856 | 0.2110 | 0.3136 | 0.2316 cathelicidin antimicrobial peptide                              |                                                       |
| 56518  | Cts6     | 0.03  | -0.05 | -0.01 | 0.07  | 0.03  | 0.5908 | 0.4245 | 0.5711 | 0.4411 cathepsin 3                                                     |                                                       |
| 56092  | Cts7     | -0.11 | 0.07  | 0.04  | -0.13 | -0.12 | 0.4022 | 0.5291 | 0.5883 | 0.3783 cathepsin 6                                                     |                                                       |
| 56094  | Cts8     | 0.01  | -0.02 | 0.04  | -0.01 | -0.01 | 0.6731 | 0.5737 | 0.4892 | 0.1099 cathepsin 7                                                     |                                                       |
| 19025  | Ctsa     | -0.24 | 0.07  | -0.09 | -0.13 | -0.12 | 0.4375 | 0.3875 | 0.5443 | 0.4376 cathepsin 8                                                     |                                                       |
| 19025  | Ctsa     | -0.61 | -0.21 | 0.11  | 0.13  | 0.01  | 0.4633 | 0.5096 | 0.3273 | 0.2537 cathepsin 8                                                     |                                                       |
| 13030  | Ctsb     | -0.05 | 0.04  | 0.10  | -0.15 | 0.04  | 0.6598 | 0.6062 | 0.6275 | 0.4815 cathepsin A                                                     |                                                       |
| 13030  | Ctsb     | 0.40  | -0.38 | -0.16 | 0.06  | 0.29  | 0.2879 | 0.1919 | 0.0561 | 0.3946 cathepsin A                                                     |                                                       |
| 13032  | Ctsd     | 0.67  | -0.76 | -0.29 | 0.10  | 0.24  | 0.0653 | 0.0157 | 0.0517 | 0.0092 cathepsin B                                                     |                                                       |
| 13033  | Ctsd     | 0.77  | -0.53 | -0.10 | 0.61  | 1.17  | 0.2884 | 0.2515 | 0.6228 | 0.0014 cathepsin B                                                     |                                                       |
| 13033  | Ctsd     | -0.03 | 0.21  | 0.08  | -0.39 | -0.11 | 0.6861 | 0.5779 | 0.6058 | 0.1256 cathepsin C                                                     |                                                       |
| 13034  | Ctsd     | 0.26  | 0.29  | 0.37  | 0.20  | 0.17  | 0.4365 | 0.5490 | 0.4561 | 0.0033 cathepsin D                                                     |                                                       |
| 56464  | Ctsf     | -0.12 | 0.15  | 0.36  | -0.03 | 0.10  | 0.5600 | 0.6541 | 0.3545 | 0.3946 cathepsin D                                                     |                                                       |
| 13035  | Ctsf     | 0.18  | 0.42  | 0.11  | -0.10 | -0.16 | 0.4009 | 0.1629 | 0.5037 | 0.0683 cathepsin E                                                     |                                                       |
| 13036  | Ctsf     | -0.20 | -0.28 | 0.28  | 0.43  | 0.81  | 0.6268 | 0.5696 | 0.2404 | 0.1890 cathepsin F                                                     |                                                       |
| 26898  | Ctsj     | 0.12  | -0.16 | -0.13 | -0.01 | 0.02  | 0.4221 | 0.2379 | 0.3165 | 0.2767 cathepsin F                                                     |                                                       |
| 13038  | Ctsk     | 1.01  | -0.63 | -0.55 | 0.03  | 0.21  | 0.0361 | 0.0681 | 0.0761 | 0.4286 cathepsin H                                                     |                                                       |
| 13039  | Ctsl     | 0.42  | -0.34 | -0.31 | 0.00  | 0.25  | 0.1394 | 0.0923 | 0.0891 | 0.1582 cathepsin K                                                     |                                                       |
| 64139  | Ctsm     | 0.00  | -0.11 | -0.04 | 0.06  | -0.08 | 0.6938 | 0.2920 | 0.5056 | 0.1017 cathepsin L                                                     |                                                       |
| 229445 | Ctsn     | 0.40  | -0.51 | -0.27 | 0.03  | 0.15  | 0.3734 | 0.0678 | 0.2024 | 0.0107 cathepsin L                                                     |                                                       |
| 104002 | Ctsq     | 0.03  | 0.06  | 0.08  | -0.02 | -0.02 | 0.6309 | 0.4849 | 0.4672 | 0.2087 cathepsin M                                                     |                                                       |
| 56835  | Ctsr     | 0.17  | -0.19 | -0.10 | 0.05  | -0.02 | 0.2238 | 0.0681 | 0.2056 | 0.2638 cathepsin M                                                     |                                                       |
| 13040  | Ctsr     | 0.47  | -0.89 | -0.65 | -0.14 | 0.20  | 0.2045 | 0.0100 | 0.0095 | 0.4398 cathepsin O                                                     |                                                       |
| 13041  | Ctsw     | -0.59 | 0.45  | 0.01  | 0.11  | -0.44 | 0.3851 | 0.1860 | 0.3904 | 0.4425 cathepsin Q                                                     |                                                       |
| 64138  | Ctsz     | -0.22 | -0.10 | -0.14 | 0.02  | -0.16 | 0.3680 | 0.5722 | 0.4004 | 0.3587 cathepsin R                                                     |                                                       |
| 225865 | Catsper1 | 0.11  | -0.32 | -0.40 | -0.18 | -0.35 | 0.5387 | 0.0525 | 0.0257 | 0.4398 cathepsin R                                                     |                                                       |
| 225865 | Catsper1 | 0.06  | 0.00  | -0.02 | -0.37 | -0.01 | 0.4987 | 0.6216 | 0.5124 | 0.1618 cathepsin S                                                     |                                                       |
| 225865 | Catsper2 | 0.01  | 0.04  | 0.00  | 0.10  | 0.02  | 0.6748 | 0.5650 | 0.5843 | 0.0048 cathepsin S                                                     |                                                       |
| 225865 | Catsper2 | 0.01  | 0.04  | 0.00  | 0.10  | 0.02  | 0.6748 | 0.5650 | 0.5843 | 0.2955 cathepsin W                                                     |                                                       |
| 76856  | Catsper3 | -0.65 | 0.54  | 0.24  | -0.02 | -0.42 | 0.1777 | 0.0771 | 0.2013 | 0.0214 cathepsin Z                                                     |                                                       |
| 271036 | Catsperb | 0.06  | 0.02  | -0.01 | -0.03 | 0.02  | 0.4721 | 0.4073 | 0.5172 | 0.4658 calion channel of sperm 1                                       |                                                       |
| 271036 | Catsperb | -0.06 | 0.04  | 0.06  | -0.03 | -0.01 | 0.4875 | 0.6266 | 0.5725 |                                                                        |                                                       |

|        |         |       |        |       |       |       |        |        |        |        |                                                                                        |
|--------|---------|-------|--------|-------|-------|-------|--------|--------|--------|--------|----------------------------------------------------------------------------------------|
| 12389  | Cav1    | 0.34  | -0.89  | -0.45 | 0.06  | 0.29  | 0.2240 | 0.0161 | 0.0876 | 0.4866 | 0.0523 caveolin, caveolae protein 1                                                    |
| 12389  | Cav1    | 0.20  | 0.22   | 0.49  | 0.65  | 1.49  | 0.6212 | 0.3437 | 0.2345 | 0.0167 | 0.0002 caveolin, caveolae protein 1                                                    |
| 12705  | Ctcd1   | -0.03 | 0.46   | 0.48  | 0.15  | 0.00  | 0.6831 | 0.5074 | 0.4704 | 0.2078 | 0.4907 Cbpb300-interacting transactivator, with Glu/Asp-rich carboxy-terminal domain 1 |
| 17684  | Ctcd1   | -0.26 | 0.34   | 0.29  | -0.02 | 0.11  | 0.2173 | 0.1405 | 0.2305 | 0.5110 | 0.2126 Cbpb300-interacting transactivator, with Glu/Asp-rich carboxy-terminal domain 2 |
| 17684  | Ctcd2   | -0.45 | 0.42   | 0.27  | -0.30 | -0.39 | 0.3360 | 0.5040 | 0.5919 | 0.0912 | 0.0152 Cbpb300-interacting transactivator, with Glu/Asp-rich carboxy-terminal domain 2 |
| 17684  | Ctcd2   | -0.05 | 0.05   | 0.02  | 0.11  | 0.21  | 0.6175 | 0.5562 | 0.5621 | 0.3448 | 0.0990 Cbpb300-interacting transactivator, with Glu/Asp-rich carboxy-terminal domain 2 |
| 17684  | Ctcd2   | -0.10 | -1.14  | -0.91 | -0.37 | -0.42 | 0.6213 | 0.0021 | 0.0059 | 0.2370 | 0.1146 Cbpb300-interacting transactivator, with Glu/Asp-rich carboxy-terminal domain 2 |
| 56222  | Ctcd4   | -0.19 | 1.74   | 2.31  | 1.38  | 1.34  | 0.3189 | 0.0003 | 0.0000 | 0.0000 | 0.0000 Cbpb300-interacting transactivator, with Glu/Asp-rich carboxy-terminal domain 4 |
| 56222  | Ctcd4   | -0.17 | 1.50   | 1.96  | 1.30  | 1.37  | 0.4435 | 0.0000 | 0.0001 | 0.0000 | 0.0000 Cbpb300-interacting transactivator, with Glu/Asp-rich carboxy-terminal domain 4 |
| 12606  | Cebpa   | 0.52  | 0.06   | 0.23  | 0.47  | 0.23  | 0.0545 | 0.6330 | 0.4503 | 0.0060 | 0.1039 CCAAT/enhancer binding protein (C/EBP), alpha                                   |
| 12606  | Cebpa   | 0.31  | -0.09  | 0.17  | 0.26  | 0.17  | 0.3618 | 0.5865 | 0.5865 | 0.2221 | 0.1483 CCAAT/enhancer binding protein (C/EBP), alpha                                   |
| 12608  | Cebpb   | 0.25  | 1.55   | 1.34  | 1.12  | 0.92  | 0.4450 | 0.0036 | 0.0048 | 0.0036 | 0.0003 CCAAT/enhancer binding protein (C/EBP), beta                                    |
| 12608  | Cebpb   | 0.02  | 0.54   | 0.08  | -0.16 | -0.26 | 0.6903 | 0.0695 | 0.5226 | 0.4135 | 0.2181 CCAAT/enhancer binding protein (C/EBP), beta                                    |
| 12609  | Cebpd   | -0.10 | 0.53   | 0.71  | 0.29  | 0.56  | 0.6005 | 0.1484 | 0.0481 | 0.1206 | 0.0145 CCAAT/enhancer binding protein (C/EBP), delta                                   |
| 12611  | Cebpg   | -1.16 | 1.2611 | 0.47  | -0.52 | -0.53 | 0.1970 | 0.0323 | 0.1542 | 0.2356 | 0.1281 CCAAT/enhancer binding protein (C/EBP), delta                                   |
| 12611  | Cebpg   | -0.18 | -1.05  | -1.35 | -1.05 | -1.63 | 0.4473 | 0.0022 | 0.0008 | 0.0002 | 0.0000 CCAAT/enhancer binding protein (C/EBP), gamma                                   |
| 12611  | Cebpg   | -0.02 | -0.37  | 0.02  | -0.17 | -0.36 | 0.5074 | 0.3907 | 0.3756 | 0.1897 | 0.0053 CCAAT/enhancer binding protein (C/EBP), gamma                                   |
| 12607  | Cebpz   | -0.64 | 0.67   | 0.46  | -0.65 | -0.68 | 0.1947 | 0.2093 | 0.3475 | 0.0604 | 0.0375 CCAAT/enhancer binding protein (C/EBP), gamma                                   |
| 12607  | Cebpz   | 0.18  | 0.45   | 0.28  | -0.09 | 0.09  | 0.5176 | 0.3623 | 0.5576 | 0.3186 | 0.0251 CCAAT/enhancer binding protein zeta                                             |
| 12607  | Cebpz   | 0.35  | 0.38   | 0.55  | 0.38  | 0.69  | 0.6177 | 0.0314 | 0.0032 | 0.0473 | 0.0014 CCAAT/enhancer binding protein zeta                                             |
| 12607  | Cebpz   | 0.06  | 0.23   | 0.01  | -0.53 | -0.43 | 0.6515 | 0.5619 | 0.5196 | 0.0349 | 0.0014 CCAAT/enhancer binding protein zeta                                             |
| 12607  | Cebpz   | 0.50  | -0.48  | -0.42 | -0.10 | 0.10  | 0.1659 | 0.0399 | 0.0525 | 0.3588 | 0.0193 CCAAT/enhancer binding protein zeta                                             |
| 12457  | Ctcf    | 0.90  | 1.37   | 1.91  | 1.49  | 1.49  | 0.5838 | 0.0057 | 0.0007 | 0.0000 | 0.3010 CCTC-binding factor                                                             |
| 12457  | Ctcf    | 0.72  | 1.61   | 1.91  | 0.61  | 0.95  | 0.2200 | 0.1107 | 0.5874 | 0.0936 | 0.0000 CCR4 carbon catabolite repression 4-like (S. cerevisiae)                        |
| 234594 | Cnrl1   | 0.76  | -0.72  | -0.86 | 0.16  | 0.90  | 0.4461 | 0.0068 | 0.0008 | 0.0001 | 0.0046 CCR4-NOT transcription complex, subunit 1                                       |
| 234594 | Cnrl1   | 0.16  | -0.70  | -0.86 | -0.73 | -0.96 | 0.4461 | 0.0068 | 0.0008 | 0.0001 | 0.0000 CCR4-NOT transcription complex, subunit 1                                       |
| 234594 | Cnrl1   | -0.07 | -0.04  | 0.03  | -0.09 | -0.09 | 0.4892 | 0.6107 | 0.5861 | 0.4748 | 0.1550 CCR4-NOT transcription complex, subunit 1                                       |
| 78993  | Cnrl10  | -0.49 | -0.25  | -0.75 | -1.55 | -1.59 | 0.3805 | 0.3423 | 0.0369 | 0.0006 | 0.0001 CCR4-NOT transcription complex, subunit 10                                      |
| 78993  | Cnrl10  | 0.23  | -0.13  | 0.18  | 0.14  | 0.41  | 0.3857 | 0.3071 | 0.5592 | 0.2868 | 0.0091 CCR4-NOT transcription complex, subunit 10                                      |
| 78993  | Cnrl10  | -0.15 | 0.48   | 0.15  | 0.08  | 0.09  | 0.5801 | 0.4808 | 0.4894 | 0.4439 | 0.3172 CCR4-NOT transcription complex, subunit 10                                      |
| 72068  | Cnrl2   | -0.43 | -0.03  | 0.15  | 0.39  | 0.69  | 0.2265 | 0.6463 | 0.4288 | 0.0664 | 0.0018 CCR4-NOT transcription complex, subunit 2                                       |
| 72068  | Cnrl2   | 0.21  | -0.46  | 0.04  | -0.18 | 0.00  | 0.3336 | 0.0314 | 0.5688 | 0.2313 | 0.4847 CCR4-NOT transcription complex, subunit 2                                       |
| 232791 | Cnrl3   | -0.36 | 0.34   | 0.18  | -0.27 | -0.26 | 0.4961 | 0.6417 | 0.2264 | 0.0228 | 0.0499 CCR4-NOT transcription complex, subunit 2                                       |
| 232791 | Cnrl3   | -0.30 | 0.14   | -0.20 | -0.43 | -0.55 | 0.2633 | 0.3715 | 0.3688 | 0.0216 | 0.0090 CCR4-NOT transcription complex, subunit 3                                       |
| 232791 | Cnrl3   | -0.49 | 0.30   | -0.38 | -1.02 | -1.33 | 0.3495 | 0.5613 | 0.2649 | 0.0175 | 0.0078 CCR4-NOT transcription complex, subunit 3                                       |
| 53921  | Cnrl4   | 0.33  | -0.36  | -0.22 | -0.10 | 0.28  | 0.2002 | 0.1651 | 0.2558 | 0.3870 | 0.0526 CCR4-NOT transcription complex, subunit 3                                       |
| 53921  | Cnrl4   | -0.72 | -0.03  | 0.05  | 0.01  | -0.14 | 0.4334 | 0.4162 | 0.3547 | 0.5488 | 0.0812 CCR4-NOT transcription complex, subunit 3                                       |
| 53921  | Cnrl4   | -0.19 | -0.42  | -0.44 | -0.92 | -0.49 | 0.5214 | 0.1056 | 0.0734 | 0.0066 | 0.0528 CCR4-NOT transcription complex, subunit 4                                       |
| 53921  | Cnrl4   | 0.01  | 0.04   | -0.06 | -0.85 | -0.60 | 0.6644 | 0.4649 | 0.4575 | 0.1109 | 0.0857 CCR4-NOT transcription complex, subunit 4                                       |
| 104925 | Cnrl6   | 0.35  | -0.92  | -0.55 | 0.07  | -0.07 | 0.3957 | 0.1144 | 0.0651 | 0.5029 | 0.3552 CCR4-NOT transcription complex, subunit 4                                       |
| 231464 | Cnrl6l  | -0.39 | -0.26  | 0.32  | 0.47  | 0.71  | 0.5399 | 0.5492 | 0.2353 | 0.0269 | 0.0088 CCR4-NOT transcription complex, subunit 4                                       |
| 231464 | Cnrl6l  | -0.43 | -0.48  | -0.12 | -0.10 | 0.28  | 0.0840 | 0.0478 | 0.1344 | 0.1837 | 0.4018 CCR4-NOT transcription complex, subunit 4                                       |
| 231464 | Cnrl6l  | -0.27 | -0.72  | -0.19 | 0.10  | 0.29  | 0.1299 | 0.2962 | 0.4484 | 0.0414 | 0.0033 CCR4-NOT transcription complex, subunit 6                                       |
| 18983  | Cnrl7   | 0.34  | -0.24  | 0.10  | 0.21  | 0.27  | 0.3744 | 0.0029 | 0.0142 | 0.1094 | 0.1624 CCR4-NOT transcription complex, subunit 6                                       |
| 18983  | Cnrl7   | 0.18  | 0.11   | 0.14  | 0.09  | 0.27  | 0.1299 | 0.2962 | 0.4484 | 0.0414 | 0.1420 CCR4-NOT transcription complex, subunit 6                                       |
| 69125  | Cnrl8   | 0.19  | -0.55  | -0.51 | -0.25 | -0.12 | 0.6169 | 0.2975 | 0.5419 | 0.5037 | 0.0009 CCR4-NOT transcription complex, subunit 7                                       |
| 246278 | Cd207   | 0.87  | -0.42  | -0.44 | 0.21  | 0.07  | 0.0946 | 0.0602 | 0.0313 | 0.2041 | 0.2834 CCR4-NOT transcription complex, subunit 8                                       |
| 12520  | Cd81    | 0.24  | -0.60  | -0.31 | 0.12  | 0.14  | 0.4687 | 0.1133 | 0.3435 | 0.3559 | 0.3012 CD 207 antigen                                                                  |
| 235505 | Cd109   | 0.10  | -0.06  | -0.03 | 0.01  | 0.08  | 0.3459 | 0.4865 | 0.5772 | 0.5455 | 0.2813 CD 81 antigen                                                                   |
| 235505 | Cd109   | 0.18  | -0.11  | -0.19 | 0.40  | 0.25  | 0.5090 | 0.5680 | 0.6420 | 0.0970 | 0.1748 CD109 antigen                                                                   |
| 235505 | Cd109   | -0.02 | -0.01  | -0.02 | -0.02 | 0.00  | 0.6229 | 0.6263 | 0.5782 | 0.5008 | 0.0353 CD109 antigen                                                                   |
| 12475  | Cd14    | 0.66  | 0.64   | 1.07  | 0.99  | 1.38  | 0.2682 | 0.3182 | 0.0597 | 0.0034 | 0.4915 CD109 antigen                                                                   |
| 12475  | Cd151   | 0.13  | -0.27  | -0.18 | -0.15 | -0.07 | 0.6613 | 0.1177 | 0.2476 | 0.2841 | 0.0001 CD14 antigen                                                                    |
| 54215  | Cd160   | 0.02  | -0.04  | -0.05 | -0.09 | -0.11 | 0.5278 | 0.3701 | 0.3200 | 0.2238 | 0.3957 CD151 antigen                                                                   |
| 93671  | Cd163   | 0.68  | 0.68   | 0.76  | 0.42  | 0.33  | 0.5765 | 0.0910 | 0.0829 | 0.2705 | 0.1378 CD160 antigen                                                                   |
| 244233 | Cd163l1 | -0.64 | 0.79   | -0.39 | 0.05  | -0.65 | 0.2274 | 0.0401 | 0.5034 | 0.4974 | 0.2033 CD163 antigen                                                                   |
| 53599  | Cd164   | 0.89  | -0.90  | -0.28 | 0.49  | 0.76  | 0.1284 | 0.1163 | 0.2884 | 0.1140 | 0.0300 CD163 molecule-like 1                                                           |
| 53599  | Cd164   | 0.46  | -0.56  | -0.02 | 0.15  | 0.25  | 0.3492 | 0.1163 | 0.5126 | 0.4096 | 0.0276 CD164 antigen                                                                   |
| 53599  | Cd164   | 0.27  | 0.06   | 0.27  | 0.06  | 0.31  | 0.4058 | 0.5096 | 0.5588 | 0.3420 | 0.0432 CD164 antigen                                                                   |
| 53599  | Cd164   | -0.04 | -0.04  | 0.00  | -0.11 | -0.06 | 0.5885 | 0.5892 | 0.6086 | 0.1552 | 0.0030 CD164 antigen                                                                   |
| 69855  | Cd164l2 | -0.10 | 0.21   | 1.24  | 0.41  | 0.68  | 0.6219 | 0.6389 | 0.0140 | 0.0036 | 0.2719 CD164 antigen                                                                   |
| 69855  | Cd164l2 | -0.10 | 0.21   | 1.24  | 0.41  | 0.68  | 0.6219 | 0.6389 | 0.0140 | 0.0036 | 0.0004 CD164 sialomucin-like 2                                                         |
| 17079  | Cd180   | 0.30  | 0.12   | -0.16 | 0.04  | -0.20 | 0.1439 | 0.1545 | 0.0309 | 0.3200 | 0.1837 CD177 antigen                                                                   |
| 17079  | Cd180   | 0.08  | 0.12   | -0.16 | 0     |       |        |        |        |        |                                                                                        |

|        |        |       |       |       |       |       |        |        |        |        |        |                                                                          |
|--------|--------|-------|-------|-------|-------|-------|--------|--------|--------|--------|--------|--------------------------------------------------------------------------|
| 12503  | Cd247  | 0.39  | -0.38 | -0.42 | 0.14  | -0.10 | 0.2516 | 0.0424 | 0.0356 | 0.3689 | 0.3060 | CD247 antigen                                                            |
| 12503  | Cd247  | 0.14  | -0.03 | 0.02  | 0.11  | 0.11  | 0.3314 | 0.5559 | 0.6046 | 0.2571 | 0.1544 | CD247 antigen                                                            |
| 12503  | Cd247  | 0.05  | 0.05  | 0.07  | 0.03  | 0.04  | 0.5543 | 0.5693 | 0.4912 | 0.4789 | 0.3134 | CD247 antigen                                                            |
| 12503  | Cd247  | 0.00  | 0.32  | 0.23  | 0.45  | 0.21  | 0.6963 | 0.0206 | 0.1216 | 0.0181 | 0.0249 | CD247 antigen                                                            |
| 70445  | Cd248  | -0.35 | 0.07  | -0.35 | -0.12 | -0.27 | 0.2002 | 0.5343 | 0.1701 | 0.3668 | 0.0691 | CD248 antigen, endosialin                                                |
| 70445  | Cd248  | 0.03  | -0.40 | 0.37  | -0.08 | -0.28 | 0.6713 | 0.0599 | 0.6145 | 0.4572 | 0.0900 | CD248 antigen, endosialin                                                |
| 12484  | Cd24a  | -0.84 | -0.56 | -0.83 | 0.07  | 0.12  | 0.0263 | 0.1490 | 0.0339 | 0.4636 | 0.2944 | CD24a antigen                                                            |
| Cd27   | Cd27   | 0.62  | -0.39 | -0.45 | -0.06 | -0.39 | 0.0542 | 0.0923 | 0.0710 | 0.4597 | 0.0089 | CD27 antigen                                                             |
| Cd27a  | Cd27a  | 0.14  | -0.64 | -0.21 | -0.52 | -0.54 | 0.5070 | 0.0049 | 0.0693 | 0.0208 | 0.0051 | CD27a antigen                                                            |
| 102657 | Cd276  | 0.09  | -0.14 | 0.12  | 0.08  | 0.22  | 0.6062 | 0.2726 | 0.6125 | 0.2841 | 0.0228 | CD276 antigen                                                            |
| Cd28   | Cd28   | 0.25  | -0.16 | -0.10 | 0.13  | 0.15  | 0.1490 | 0.1439 | 0.2901 | 0.1524 | 0.0936 | CD28 antigen                                                             |
| Cd28   | Cd28   | 0.23  | -0.07 | -0.10 | 0.14  | 0.15  | 0.2086 | 0.4623 | 0.3811 | 0.1546 | 0.0978 | CD28 antigen                                                             |
| 12487  | Cd28   | 0.16  | -0.09 | -0.04 | 0.16  | 0.17  | 0.3698 | 0.5465 | 0.6405 | 0.0833 | 0.0517 | CD28 antigen                                                             |
| 12487  | Cd28   | 0.10  | -0.11 | -0.02 | 0.10  | 0.07  | 0.3734 | 0.4167 | 0.6226 | 0.2377 | 0.2358 | CD28 antigen                                                             |
| 12487  | Cd28   | 0.13  | -0.01 | 0.02  | 0.13  | 0.08  | 0.4272 | 0.5048 | 0.5858 | 0.1907 | 0.2102 | CD28 antigen                                                             |
| 12487  | Cd28   | 0.07  | -0.01 | 0.02  | -0.05 | -0.06 | 0.4937 | 0.5386 | 0.5973 | 0.4021 | 0.2399 | CD28 antigen                                                             |
| 12487  | Cd28   | 0.07  | -0.02 | 0.00  | 0.09  | 0.18  | 0.5338 | 0.6286 | 0.5360 | 0.2824 | 0.0357 | CD28 antigen                                                             |
| 12487  | Cd28   | 0.06  | 0.02  | -0.02 | 0.09  | 0.16  | 0.5392 | 0.5820 | 0.6182 | 0.2735 | 0.0797 | CD28 antigen                                                             |
| 12487  | Cd28   | 0.06  | -0.14 | -0.07 | 0.00  | 0.09  | 0.5959 | 0.4388 | 0.6267 | 0.5596 | 0.2689 | CD28 antigen                                                             |
| 12487  | Cd28   | 0.04  | 0.02  | 0.07  | 0.08  | 0.04  | 0.6099 | 0.6252 | 0.5582 | 0.2861 | 0.3460 | CD28 antigen                                                             |
| 12487  | Cd28   | 0.03  | -0.04 | 0.02  | 0.09  | 0.04  | 0.6237 | 0.6545 | 0.5096 | 0.2390 | 0.3779 | CD28 antigen                                                             |
| 12488  | Cd28   | 0.03  | -0.04 | 0.02  | 0.09  | 0.04  | 0.4131 | 0.4952 | 0.4304 | 0.0265 | 0.0471 | CD2-associated protein                                                   |
| 12488  | Cd28p  | -0.37 | -0.15 | -0.18 | -0.78 | -0.62 | 0.4871 | 0.5715 | 0.5279 | 0.3078 | 0.0828 | CD2-associated protein                                                   |
| 12500  | Cd3d   | -0.73 | -1.03 | -0.38 | 0.13  | -0.41 | 0.3222 | 0.1189 | 0.2245 | 0.3623 | 0.0032 | CD3 antigen, delta polypeptide                                           |
| Cd3e   | Cd3e   | 0.84  | 0.84  | 0.37  | 0.13  | -0.56 | 0.4480 | 0.4914 | 0.4532 | 0.0465 | 0.2443 | CD3 antigen, epsilon polypeptide                                         |
| 12501  | Cd3e   | -0.08 | -0.08 | 0.04  | -0.15 | -0.07 | 0.5084 | 0.2145 | 0.0538 | 0.0396 | 0.2641 | CD3 antigen, epsilon polypeptide                                         |
| 12501  | Cd3e   | 0.29  | 0.27  | -0.31 | 0.34  | -0.12 | 0.2642 | 0.2927 | 0.0888 | 0.0618 | 0.2496 | CD3 antigen, gamma polypeptide                                           |
| 217304 | Cd300b | 0.11  | -0.03 | 0.06  | 0.21  | 0.33  | 0.6351 | 0.4316 | 0.3945 | 0.5527 | 0.2389 | CD300 antigen like family member B                                       |
| Cd300f | Cd300f | -0.14 | 0.40  | 0.21  | 0.32  | 0.21  | 0.4826 | 0.2114 | 0.5076 | 0.0181 | 0.0736 | CD300 antigen like family member F                                       |
| 246746 | Cd300g | 0.04  | 0.65  | 0.29  | 0.08  | 0.07  | 0.6673 | 0.1337 | 0.4522 | 0.4579 | 0.4333 | CD300 antigen like family member F                                       |
| 52685  | Cd300g | -0.35 | 0.33  | 0.15  | 0.27  | 0.30  | 0.4478 | 0.1627 | 0.2626 | 0.0604 | 0.4676 | CD300 antigen like family member G                                       |
| 217303 | Cd300a | 0.01  | 0.45  | 0.22  | 0.49  | 0.02  | 0.6928 | 0.0235 | 0.2914 | 0.0054 | 0.0142 | CD300 antigen like family member G                                       |
| Cd300a | Cd300a | -0.37 | 0.24  | -0.03 | 0.02  | -0.35 | 0.3871 | 0.1670 | 0.4771 | 0.5471 | 0.0823 | CD300A antigen                                                           |
| 387565 | Cd300c | 0.17  | 0.05  | -0.02 | 0.06  | -0.02 | 0.5446 | 0.4963 | 0.4379 | 0.4449 | 0.4592 | CD300A antigen                                                           |
| 217306 | Cd300c | 0.00  | -0.07 | -0.08 | 0.02  | -0.03 | 0.6925 | 0.5386 | 0.4773 | 0.4806 | 0.4592 | CD300C antigen                                                           |
| Cd300e | Cd300e | 0.18  | -1.23 | -1.46 | -0.89 | -1.28 | 0.6058 | 0.0038 | 0.0004 | 0.0710 | 0.0611 | CD300C antigen                                                           |
| 66205  | Cd302  | 0.48  | -0.82 | -0.43 | -0.04 | 0.41  | 0.2737 | 0.0551 | 0.2032 | 0.5359 | 0.0848 | CD302 antigen                                                            |
| 54219  | Cd320  | 0.27  | -0.04 | -0.09 | 0.08  | -0.06 | 0.3189 | 0.3872 | 0.2795 | 0.3945 | 0.3945 | CD320 antigen                                                            |
| Cd320  | Cd320  | 0.22  | 0.46  | 0.17  | -0.31 | -0.53 | 0.4660 | 0.3064 | 0.5716 | 0.1689 | 0.0115 | CD320 antigen                                                            |
| 12489  | Cd34   | 0.11  | -0.03 | 0.06  | 0.21  | 0.33  | 0.5396 | 0.5078 | 0.3919 | 0.1321 | 0.0227 | CD33 antigen                                                             |
| Cd34   | Cd34   | -0.21 | -0.45 | -0.31 | -0.50 | -0.53 | 0.3320 | 0.0145 | 0.0521 | 0.0136 | 0.0041 | CD34 antigen                                                             |
| 12490  | Cd36   | 0.50  | -0.64 | -0.26 | 0.25  | 0.15  | 0.1008 | 0.0388 | 0.1284 | 0.1039 | 0.2297 | CD36 antigen                                                             |
| 12491  | Cd36   | -0.01 | -0.12 | -0.60 | -0.01 | 0.66  | 0.6705 | 0.6457 | 0.4063 | 0.0103 | 0.0082 | CD36 antigen                                                             |
| 12493  | Cd37   | -0.45 | 0.69  | -0.24 | -0.80 | -1.20 | 0.3743 | 0.2490 | 0.2902 | 0.0170 | 0.0010 | CD37 antigen                                                             |
| 12493  | Cd37   | -0.34 | -0.58 | -0.39 | -0.75 | -1.09 | 0.4708 | 0.3191 | 0.2044 | 0.0317 | 0.0015 | CD37 antigen                                                             |
| 12494  | Cd38   | 0.73  | -0.59 | -0.59 | 0.26  | 0.18  | 0.0107 | 0.0734 | 0.0032 | 0.0682 | 0.2523 | CD38 antigen                                                             |
| Cd38   | Cd38   | 0.01  | 0.05  | 0.01  | 0.13  | 0.06  | 0.2697 | 0.5964 | 0.6351 | 0.2006 | 0.3672 | CD38 antigen                                                             |
| Cd38ap | Cd38ap | -0.22 | 0.09  | 0.07  | -0.72 | -0.80 | 0.2029 | 0.1812 | 0.3759 | 0.0191 | 0.0031 | CD3E antigen, epsilon polypeptide associated protein                     |
| 12504  | Cd4    | -0.20 | 0.05  | 0.08  | -0.05 | -0.22 | 0.2399 | 0.5199 | 0.2432 | 0.4366 | 0.0402 | CD4 antigen                                                              |
| Cd4    | Cd4    | 0.05  | 0.08  | 0.09  | -0.01 | -0.04 | 0.3171 | 0.3913 | 0.2754 | 0.5536 | 0.3427 | CD4 antigen                                                              |
| 12504  | Cd4    | -0.08 | 0.04  | 0.09  | 0.08  | -0.03 | 0.4515 | 0.3851 | 0.1870 | 0.1937 | 0.4083 | CD4 antigen                                                              |
| 12504  | Cd4    | -0.08 | 0.00  | 0.06  | -0.06 | -0.02 | 0.4738 | 0.6093 | 0.3690 | 0.3851 | 0.4468 | CD4 antigen                                                              |
| 12504  | Cd4    | 0.16  | 0.13  | 0.01  | -0.13 | 0.01  | 0.5046 | 0.6184 | 0.4271 | 0.4859 | 0.4668 | CD4 antigen                                                              |
| 12504  | Cd4    | -0.10 | 0.03  | 0.01  | -0.25 | -0.12 | 0.5656 | 0.5903 | 0.4967 | 0.1006 | 0.2483 | CD4 antigen                                                              |
| 12504  | Cd4    | -0.05 | 0.08  | 0.17  | 0.01  | -0.08 | 0.5724 | 0.4540 | 0.1945 | 0.5337 | 0.1896 | CD4 antigen                                                              |
| 12504  | Cd4    | -0.03 | -0.01 | 0.05  | 0.03  | 0.00  | 0.5926 | 0.6468 | 0.5039 | 0.4463 | 0.4813 | CD4 antigen                                                              |
| 12504  | Cd4    | -0.04 | 0.07  | 0.11  | 0.05  | 0.00  | 0.6021 | 0.3678 | 0.2479 | 0.3886 | 0.4860 | CD4 antigen                                                              |
| 12504  | Cd4    | 0.07  | 0.18  | 0.22  | 0.05  | -0.02 | 0.6356 | 0.6478 | 0.6120 | 0.3873 | 0.4274 | CD4 antigen                                                              |
| 12504  | Cd4    | 0.04  | 0.10  | 0.23  | 0.06  | -0.33 | 0.6591 | 0.6004 | 0.5223 | 0.3600 | 0.3328 | CD4 antigen                                                              |
| 21939  | Cd40   | -0.56 | 0.14  | 0.13  | -0.26 | -0.04 | 0.6591 | 0.4707 | 0.5140 | 0.1173 | 0.0308 | CD40 antigen                                                             |
| 21939  | Cd40   | -0.36 | -0.03 | -0.05 | -0.21 | -0.28 | 0.1615 | 0.5687 | 0.5093 | 0.1748 | 0.0709 | CD40 antigen                                                             |
| 21939  | Cd40   | -0.61 | 0.01  | -0.06 | -0.13 | -0.32 | 0.2214 | 0.4115 | 0.4692 | 0.2745 | 0.0347 | CD40 antigen                                                             |
| 21939  | Cd40   | -0.79 | -0.02 | 0.12  | -0.15 | -0.21 | 0.2267 | 0.4256 | 0.2980 | 0.1933 | 0.1008 | CD40 antigen                                                             |
| 21939  | Cd40   | -0.78 | 0.03  | -0.03 | -0.16 | -0.29 | 0.3906 | 0.3897 | 0.4259 | 0.2138 | 0.0568 | CD40 antigen                                                             |
| 21939  | Cd40   | -0.73 | 0.03  | 0.02  | -0.14 | -0.38 | 0.2287 | 0.3906 | 0.3952 | 0.2437 | 0.0199 | CD40 antigen                                                             |
| 21939  | Cd40   | -0.29 | 0.00  | -0.06 | -0.19 | -0.23 | 0.2756 | 0.5540 | 0.4308 | 0.2094 | 0.0831 | CD40 antigen                                                             |
| 21939  | Cd40   | -0.22 | 0.12  | 0.01  | -0.17 | -0.13 | 0.4727 | 0.5912 | 0.4436 | 0.2578 | 0.2243 | CD40 antigen                                                             |
| 21939  | Cd40   | -0.15 | -0.11 | -0.16 | -0.14 | -0.25 | 0.3460 | 0.3076 | 0.3238 | 0.1183 | 0.1183 | CD40 antigen                                                             |
| 21939  | Cd40   | -0.15 | -0.19 | -0.12 | -0.26 | -0.32 | 0.5249 | 0.2072 | 0.3120 | 0.1590 | 0.0400 | CD40 antigen                                                             |
| 21947  | Cd40lg | 0.07  | -0.03 | 0.01  | 0.15  | 0.10  | 0.4875 | 0.5984 | 0.6017 | 0.2242 | 0.1510 | CD40 ligand                                                              |
| 12505  | Cd44   | 0.33  | -0.14 | 0.11  | -0.11 | 0.11  | 0.1270 | 0.3470 | 0.5818 | 0.3741 | 0.2158 | CD44 antigen                                                             |
| 12505  | Cd44   | 0.25  | 0.04  | 0.39  | -0.06 | 0.27  | 0.3230 | 0.5553 | 0.2420 | 0.4565 | 0.0378 | CD44 antigen                                                             |
| 12505  | Cd44   | 0.28  | -0.02 | 0.20  | -0.07 | 0.09  | 0.3304 | 0.5048 | 0.5532 | 0.4525 | 0.2881 | CD44 antigen                                                             |
| 12505  | Cd44   | 0.42  | 0.19  | 0.23  | 0.16  | 0.65  | 0.3308 | 0.6508 | 0.6181 | 0.3389 | 0.0075 | CD44 antigen                                                             |
| 12505  | Cd44   | 0.30  | 0.04  | 0.28  | -0.05 | 0.35  | 0.3351 | 0.6030 | 0.4209 | 0.4940 | 0.0052 | CD44 antigen                                                             |
| 12505  | Cd44   | 0.31  | 0.07  | 0.30  | -0.03 | 0.24  | 0.3515 | 0.6095 | 0.4205 | 0.5193 | 0.0436 | CD44 antigen                                                             |
| 12505  | Cd44   | 0.16  | 0.06  | 0.31  | -0.09 | 0.02  | 0.4122 | 0.6493 | 0.2470 | 0.3565 | 0.4595 | CD44 antigen                                                             |
| 12505  | Cd44   | 0.14  | -0.05 | 0.14  | 0.02  | 0.02  | 0.4692 | 0.3400 | 0.6262 | 0.4911 | 0.4168 | CD44 antigen                                                             |
| 12505  | Cd44   | 0.18  | 0.12  | 0.38  | -0.04 | 0.18  | 0.5002 | 0.6185 | 0.2732 | 0.4952 | 0.0482 | CD44 antigen                                                             |
| 12505  | Cd44   | 0.14  | 0.03  | 0.30  | -0.08 | 0.19  | 0.5137 | 0.6348 | 0.3622 | 0.3491 | 0.0976 | CD44 antigen                                                             |
| 12505  | Cd44   | 0.10  | 0.12  | 0.38  | -0.09 | 0.20  | 0.5546 | 0.5696 | 0.2116 | 0.3703 | 0.0761 | CD44 antigen                                                             |
| 12505  | Cd44   | -0.04 | 0.01  | 0.30  | -0.13 | 0.14  | 0.6568 | 0.4564 | 0.0987 | 0.2335 | 0.1661 | CD44 antigen                                                             |
| 12505  | Cd44   | -0.04 | 0.01  | 0.08  | -0.01 | -0.02 | 0.4526 | 0.2788 | 0.6099 | 0.4718 | 0.4150 | CD46 antigen, complement regulatory protein                              |
| 17221  | Cd46   | -0.07 | 0.08  | -0.01 | -0.02 | 0.02  | 0.1485 | 0.1668 | 0.1274 | 0.0698 | 0.0186 | CD46 antigen, integrin-associated signal transducer                      |
| 16423  | Cd47   | -1.45 | 0.88  | 0.69  | -0.74 | -0.93 | 0.4526 | 0.2788 | 0.6099 | 0.4718 | 0.0105 | CD47 antigen (Rh-related antigen, integrin-associated signal transducer) |
| 16423  | Cd47   | 0.42  | -0.32 | 0.02  | 0.53  | 0.65  | 0.2948 | 0.2948 | 0.6337 | 0.0477 | 0.0832 | CD47 antigen (Rh-related antigen, integrin-associated signal transducer) |
| 16423  | Cd47   | -0.38 | 0.07  | 0.07  | -0.05 | 0.38  | 0.5242 | 0.5718 | 0.3606 | 0.5084 | 0.0015 | CD47 antigen (Rh-related antigen, integrin-associated signal transducer) |
| 16423  | Cd47   | -0.10 | -0.14 | 0.31  | 0.93  | 1.05  | 0.6815 | 0.4760 | 0.2881 | 0.0127 | 0.0231 | CD48 antigen                                                             |
| 12506  | Cd48   | 0.68  | -1.32 | -1.34 | -0.36 | -0.63 | 0.2047 | 0.0017 | 0.0003 | 0.2680 | 0.0713 | CD48 antigen                                                             |
| 12507  | Cd5    | 0.10  | -0.71 | -0.52 | 0.04  | -0.47 | 0.6277 | 0.1292 | 0.1968 | 0.1701 | 0.0030 | CD5 antigen                                                              |
| 11801  | Cd5i   | -0.52 | 0.01  | -0.52 | 0.04  | -0.47 | 0.5025 | 0.3151 | 0.0373 | 0.4951 | 0.0237 | CD5 antigen-like                                                         |
| 23833  | Cd52   | -0.82 | 0.56  | 0.47  | -0.63 | -0.94 | 0.2463 | 0.2163 | 0.3448 | 0.2217 | 0.0000 | CD52 antigen                                                             |
|        |        | -0.71 | -0.31 | -1.11 | -1.09 | -2.01 | 0.2598 | 0.6317 | 0.1036 | 0      |        |                                                                          |

|        |        |       |       |       |       |       |        |        |        |        |        |                                                                                                       |
|--------|--------|-------|-------|-------|-------|-------|--------|--------|--------|--------|--------|-------------------------------------------------------------------------------------------------------|
| 12808  | Cd53   | 0.23  | -0.54 | -0.24 | 0.20  | 0.64  | 0.5406 | 0.0471 | 0.3249 | 0.4157 | 0.0508 | CD53 antigen                                                                                          |
| 13136  | Cd55   | 0.41  | -0.44 | -0.35 | -0.17 | -0.23 | 0.3766 | 0.0939 | 0.1241 | 0.3425 | 0.1767 | CD55 antigen                                                                                          |
| 13136  | Cd55   | 0.06  | -0.09 | -0.09 | -0.01 | -0.02 | 0.5569 | 0.5049 | 0.2446 | 0.5350 | 0.4373 | CD55 antigen                                                                                          |
| 13136  | Cd55   | -0.09 | -0.62 | -0.44 | -0.22 | -0.19 | 0.6222 | 0.1937 | 0.3444 | 0.1737 | 0.1310 | CD55 antigen                                                                                          |
| 12509  | Cd59a  | -0.67 | -0.06 | -0.04 | 0.13  | -0.08 | 0.4499 | 0.3832 | 0.4058 | 0.2601 | 0.3266 | CD59a antigen                                                                                         |
| 12509  | Cd59a  | 0.15  | -0.05 | -0.11 | -0.11 | -0.01 | 0.5573 | 0.4095 | 0.2801 | 0.3904 | 0.4737 | CD59a antigen                                                                                         |
| 333883 | Cd59b  | 0.06  | -0.02 | -0.03 | 0.03  | -0.01 | 0.4919 | 0.5784 | 0.4975 | 0.4472 | 0.4694 | CD59b antigen                                                                                         |
| 333883 | Cd59b  | 0.14  | 0.04  | -0.34 | -0.24 | -0.26 | 0.4919 | 0.5912 | 0.0286 | 0.0731 | 0.0262 | CD59b antigen                                                                                         |
| 12511  | Cd6    | 0.06  | 0.09  | 0.16  | 0.18  | 0.06  | 0.4514 | 0.2868 | 0.1008 | 0.0598 | 0.2251 | CD6 antigen                                                                                           |
| 12511  | Cd6    | -0.06 | 0.98  | 0.87  | 0.63  | 0.39  | 0.6539 | 0.0604 | 0.0874 | 0.0031 | 0.0060 | CD6 antigen                                                                                           |
| 12512  | Cd63   | 0.37  | -0.21 | 0.06  | 0.45  | 0.66  | 0.3549 | 0.3882 | 0.6329 | 0.1035 | 0.0279 | CD63 antigen                                                                                          |
| 12512  | Cd63   | -0.02 | -0.56 | 0.11  | 0.11  | 0.10  | 0.6903 | 0.0794 | 0.6403 | 0.4705 | 0.3532 | CD63 antigen                                                                                          |
| 12515  | Cd68   | 0.25  | 0.53  | 0.67  | 0.36  | 0.25  | 0.4308 | 0.1059 | 0.0407 | 0.0194 | 0.0442 | CD68 antigen                                                                                          |
| 12516  | Cd7    | -0.35 | 0.71  | 0.32  | -0.04 | -0.66 | 0.4073 | 0.2479 | 0.4851 | 0.5232 | 0.0057 | CD7 antigen                                                                                           |
| 21948  | Cd70   | -0.06 | 0.07  | 0.10  | -0.01 | -0.05 | 0.5434 | 0.5842 | 0.5154 | 0.5354 | 0.3085 | CD70 antigen                                                                                          |
| 12517  | Cd72   | -0.42 | 0.32  | -0.40 | -0.06 | -0.60 | 0.3782 | 0.1928 | 0.5418 | 0.4307 | 0.0004 | CD72 antigen                                                                                          |
| 12517  | Cd72   | -0.02 | 0.21  | -0.38 | -0.03 | -0.41 | 0.6759 | 0.3660 | 0.0229 | 0.5041 | 0.0011 | CD72 antigen                                                                                          |
| 16149  | Cd74   | -0.10 | 0.32  | 0.47  | 0.21  | 0.18  | 0.6000 | 0.4115 | 0.2383 | 0.3011 | 0.2444 | CD74 antigen (invariant polypeptide of major histocompatibility complex, class II antigen-associated) |
| 12518  | Cd79a  | -0.18 | 0.10  | -0.09 | 0.06  | -0.09 | 0.3444 | 0.2482 | 0.6055 | 0.4188 | 0.2384 | CD79A antigen (immunoglobulin-associated alpha)                                                       |
| 15985  | Cd79b  | -0.44 | 0.09  | -0.51 | -0.35 | -0.46 | 0.1711 | 0.3547 | 0.1539 | 0.0779 | 0.0147 | CD79B antigen                                                                                         |
| 12525  | Cd8a   | 0.31  | 0.20  | 0.02  | 0.21  | -0.11 | 0.3892 | 0.5973 | 0.4773 | 0.3333 | 0.2724 | CD8 antigen, alpha chain                                                                              |
| 12525  | Cd8a   | 0.24  | 0.15  | -0.03 | 0.23  | -0.18 | 0.3944 | 0.6343 | 0.3850 | 0.2734 | 0.0990 | CD8 antigen, alpha chain                                                                              |
| 12525  | Cd8a   | 0.16  | 0.04  | -0.20 | 0.11  | -0.41 | 0.4908 | 0.5247 | 0.1387 | 0.4453 | 0.0071 | CD8 antigen, alpha chain                                                                              |
| 12525  | Cd8a   | 0.18  | 0.15  | -0.20 | 0.23  | -0.26 | 0.4944 | 0.4805 | 0.1131 | 0.2921 | 0.1039 | CD8 antigen, alpha chain                                                                              |
| 12525  | Cd8a   | 0.23  | -0.03 | -0.07 | 0.19  | -1.27 | 0.5038 | 0.6284 | 0.3262 | 0.3728 | 0.2195 | CD8 antigen, alpha chain                                                                              |
| 12525  | Cd8a   | 0.17  | -0.03 | -0.79 | -0.26 | -0.10 | 0.5387 | 0.4952 | 0.0071 | 0.3099 | 0.0000 | CD8 antigen, alpha chain                                                                              |
| 12525  | Cd8a   | 0.08  | -0.05 | -0.08 | 0.00  | -0.16 | 0.5599 | 0.3469 | 0.2640 | 0.5653 | 0.0620 | CD8 antigen, alpha chain                                                                              |
| 12525  | Cd8a   | 0.10  | 0.22  | 0.04  | 0.12  | -0.29 | 0.5887 | 0.5661 | 0.4939 | 0.4125 | 0.0250 | CD8 antigen, alpha chain                                                                              |
| 12525  | Cd8a   | -0.10 | 0.12  | 0.00  | 0.24  | -0.30 | 0.6358 | 0.3067 | 0.4255 | 0.3019 | 0.1165 | CD8 antigen, alpha chain                                                                              |
| 12525  | Cd8a   | -0.03 | 0.09  | -0.18 | 0.17  | -0.33 | 0.6800 | 0.3401 | 0.5650 | 0.3591 | 0.0519 | CD8 antigen, alpha chain                                                                              |
| 12525  | Cd8a   | 0.01  | 0.21  | 0.01  | 0.21  | -0.24 | 0.6942 | 0.1601 | 0.5672 | 0.3150 | 0.1351 | CD8 antigen, alpha chain                                                                              |
| 12525  | Cd8a   | 0.00  | 0.23  | -0.03 | 0.26  | -0.26 | 0.7034 | 0.0590 | 0.6300 | 0.2680 | 0.1397 | CD8 antigen, alpha chain                                                                              |
| 12526  | Cd8b1  | -0.51 | -0.14 | -0.70 | 0.01  | -1.29 | 0.5271 | 0.4695 | 0.6154 | 0.5594 | 0.0001 | CD8 antigen, alpha chain                                                                              |
| 12519  | Cd80   | -0.11 | 0.34  | 0.10  | 0.04  | 0.01  | 0.4029 | 0.0530 | 0.3133 | 0.4242 | 0.4676 | CD80 antigen                                                                                          |
| 12519  | Cd80   | 0.13  | -0.05 | -0.01 | 0.20  | 0.18  | 0.4428 | 0.6049 | 0.5105 | 0.0202 | 0.0224 | CD80 antigen                                                                                          |
| 12521  | Cd82   | -0.89 | 0.05  | -0.01 | 0.09  | -0.22 | 0.3935 | 0.3976 | 0.3148 | 0.0202 | 0.1039 | CD82 antigen                                                                                          |
| 12522  | Cd83   | -0.16 | -0.14 | -0.16 | -0.22 | -0.42 | 0.5228 | 0.3637 | 0.3223 | 0.1194 | 0.0064 | CD83 antigen                                                                                          |
| 12523  | Cd84   | -0.16 | 0.12  | -0.22 | 0.02  | -0.06 | 0.5906 | 0.3599 | 0.6035 | 0.5336 | 0.3800 | CD84 antigen                                                                                          |
| 12524  | Cd86   | 0.30  | -0.38 | -0.36 | 0.37  | -1.04 | 0.0897 | 0.0603 | 0.0539 | 0.0162 | 0.0256 | CD86 antigen                                                                                          |
| 12527  | Cd9    | 0.87  | -0.31 | -0.07 | 0.17  | 0.17  | 0.1921 | 0.0689 | 0.4138 | 0.2521 | 0.1260 | CD9 antigen                                                                                           |
| 12527  | Cd9    | -0.81 | 0.06  | -0.03 | -0.08 | -0.13 | 0.3841 | 0.6219 | 0.3841 | 0.4557 | 0.2803 | CD9 antigen                                                                                           |
| 17064  | Cd93   | 0.03  | 0.01  | 0.03  | 0.01  | 0.04  | 0.6219 | 0.6294 | 0.6226 | 0.5594 | 0.3625 | CD9 antigen                                                                                           |
| 17064  | Cd93   | -0.33 | 0.20  | 0.61  | 0.22  | 0.35  | 0.4716 | 0.6426 | 0.2404 | 0.3129 | 0.0715 | CD93 antigen                                                                                          |
| 17064  | Cd93   | -0.13 | 0.46  | 0.55  | 0.07  | -0.13 | 0.6012 | 0.4690 | 0.3056 | 0.4748 | 0.3269 | CD93 antigen                                                                                          |
| 84544  | Cd96   | 0.01  | 0.14  | -0.05 | 0.21  | 0.09  | 0.5890 | 0.5890 | 0.4262 | 0.2452 | 0.3274 | CD96 antigen                                                                                          |
| 26364  | Cd97   | 0.38  | -0.85 | -0.76 | -0.32 | -0.40 | 0.4545 | 0.0685 | 0.0466 | 0.3130 | 0.1295 | CD97 antigen                                                                                          |
| 673094 | Cd99   | -0.55 | 0.64  | 1.21  | 0.52  | 0.30  | 0.2535 | 0.0353 | 0.0058 | 0.0362 | 0.0864 | CD99 antigen                                                                                          |
| 673094 | Cd99   | 0.14  | -0.09 | 0.11  | 0.24  | 0.23  | 0.5177 | 0.2933 | 0.5959 | 0.1534 | 0.1500 | CD99 antigen                                                                                          |
| 171486 | Cd99l2 | -0.47 | -0.15 | -0.55 | -0.71 | -0.75 | 0.4283 | 0.3951 | 0.1500 | 0.0038 | 0.0006 | CD99 antigen-like 2                                                                                   |
| 171486 | Cd99l2 | 0.17  | 0.04  | 0.15  | 0.10  | 0.15  | 0.4520 | 0.5274 | 0.6156 | 0.2130 | 0.0625 | CD99 antigen-like 2                                                                                   |
| 171486 | Cd99l2 | 0.21  | 0.12  | 0.27  | 0.50  | 0.66  | 0.4721 | 0.6545 | 0.4663 | 0.0026 | 0.0007 | CD99 antigen-like 2                                                                                   |
| 12750  | Clk4   | 0.49  | -0.28 | 0.09  | 0.42  | 0.94  | 0.0656 | 0.3916 | 0.5321 | 0.0145 | 0.0006 | CDK like kinase 4                                                                                     |
| 12750  | Clk4   | -0.11 | -0.01 | 0.00  | -0.12 | 0.03  | 0.4604 | 0.5847 | 0.5620 | 0.1498 | 0.4275 | CDK like kinase 4                                                                                     |
| 12750  | Clk4   | 0.09  | -0.23 | 0.20  | 0.67  | 1.16  | 0.6660 | 0.5833 | 0.3435 | 0.0072 | 0.0006 | CDK like kinase 4                                                                                     |
| 12750  | Clk4   | -0.03 | 0.26  | 0.15  | -0.20 | 0.23  | 0.6747 | 0.5082 | 0.6064 | 0.3096 | 0.0601 | CDK like kinase 4                                                                                     |
| 229776 | Cdc14a | -0.20 | -0.02 | -0.09 | -0.32 | -0.25 | 0.3875 | 0.6054 | 0.3566 | 0.0543 | 0.0721 | CDK14 cell division cycle 14 homolog A (S. cerevisiae)                                                |
| 229776 | Cdc14a | -0.44 | -0.25 | -0.59 | -0.55 | -0.83 | 0.4633 | 0.5817 | 0.5233 | 0.0188 | 0.0027 | CDK14 cell division cycle 14 homolog A (S. cerevisiae)                                                |
| 229776 | Cdc14a | -0.06 | -0.22 | -0.31 | -0.28 | -0.39 | 0.6343 | 0.1314 | 0.0880 | 0.1295 | 0.0315 | CDK14 cell division cycle 14 homolog A (S. cerevisiae)                                                |
| 218294 | Cdc14b | -0.13 | -0.40 | -0.52 | -0.30 | -0.32 | 0.4901 | 0.0743 | 0.0334 | 0.0375 | 0.0498 | CDK14 cell division cycle 14 homolog B (S. cerevisiae)                                                |
| 218294 | Cdc14b | -0.03 | -0.03 | -0.10 | 0.00  | -0.02 | 0.6139 | 0.4371 | 0.2700 | 0.5653 | 0.4343 | CDK14 cell division cycle 14 homolog B (S. cerevisiae)                                                |
| 69957  | Cdc16  | 0.16  | -0.03 | -0.07 | 0.12  | 0.00  | 0.5319 | 0.4350 | 0.3494 | 0.1154 | 0.4181 | CDK16 cell division cycle 16 homolog (S. cerevisiae)                                                  |
| 69957  | Cdc16  | 0.04  | -0.12 | -0.02 | 0.01  | 0.04  | 0.6141 | 0.4851 | 0.5676 | 0.5318 | 0.2176 | CDK16 cell division cycle 16 homolog (S. cerevisiae)                                                  |
| 69957  | Cdc16  | 0.02  | 0.05  | 0.14  | 0.07  | 0.03  | 0.6616 | 0.6035 | 0.5370 | 0.3625 | 0.3361 | CDK16 cell division cycle 16 homolog (S. cerevisiae)                                                  |
| 52663  | Cdc23  | -0.23 | -0.89 | -1.20 | -0.52 | -0.98 | 0.5953 | 0.4090 | 0.2050 | 0.0003 | 0.0000 | CDK23 (cell division cycle 23, yeast, homolog)                                                        |
| 54124  | Clk1b  | -0.52 | 0.21  | -0.19 | -0.39 | 0.29  | 0.6514 | 0.3875 | 0.2843 | 0.2111 | 0.0411 | CDK23 (cell division cycle 23, yeast, homolog)                                                        |
| 66197  | Cks2   | 0.58  | -0.44 | 0.06  | 0.09  | 0.27  | 0.4933 | 0.5348 | 0.5094 | 0.0625 | 0.0229 | CDK28 protein kinase 1b                                                                               |
| 69131  | Clk1s  | -0.02 | -0.24 | 0.20  | 0.10  | 0.29  | 0.2198 | 0.1324 | 0.5979 | 0.3970 | 0.0139 | CDK28 protein kinase regulatory subunit 2                                                             |
| 69131  | Clk1s  | 0.56  | 0.14  | 0.16  | 0.33  | 0.73  | 0.6922 | 0.6388 | 0.2593 | 0.4324 | 0.0591 | CDK28 protein kinase regulatory subunit 2                                                             |
| 69131  | Clk1s  | 0.18  | 0.01  | 0.01  | -0.01 | 0.19  | 0.1650 | 0.6532 | 0.0340 | 0.0340 | 0.0012 | CDK2-related kinase, arginine-serine-rich                                                             |
| 69131  | Clk1s  | 0.07  | -0.06 | -     |       |       |        |        |        |        |        |                                                                                                       |

|        |               |       |       |       |       |       |        |        |        |        |        |                                                       |
|--------|---------------|-------|-------|-------|-------|-------|--------|--------|--------|--------|--------|-------------------------------------------------------|
| 57912  | Cdc42ae1      | 0.11  | 1.01  | 0.85  | 0.36  | 0.36  | 0.5866 | 0.0370 | 0.0197 | 0.0838 | 0.0770 | CDC42 small effector 1                                |
| 72729  | Cdc42ae2      | 0.16  | -0.08 | 0.32  | 0.10  | 0.19  | 0.5486 | 0.4289 | 0.4355 | 0.3116 | 0.1167 | CDC42 small effector 2                                |
| 72729  | Cdc42ae2      | -0.16 | 0.61  | 0.37  | -0.26 | -0.29 | 0.5606 | 0.2125 | 0.3975 | 0.2024 | 0.1360 | CDC42 small effector 2                                |
| 12747  | Clk1          | -0.73 | -1.33 | -0.73 | -0.58 | -0.50 | 0.4965 | 0.4686 | 0.6379 | 0.0503 | 0.0637 | CDC-like kinase 1                                     |
| 12747  | Clk1          | -0.32 | -1.54 | -0.85 | -0.46 | -0.16 | 0.6146 | 0.3865 | 0.6063 | 0.1233 | 0.3329 | CDC-like kinase 1                                     |
| 12748  | Clk2          | 0.51  | -0.15 | -0.21 | 0.21  | 0.47  | 0.2624 | 0.3950 | 0.3383 | 0.2286 | 0.0056 | CDC-like kinase 2                                     |
| 12748  | Clk2          | 0.19  | -0.37 | -0.14 | 0.25  | 0.48  | 0.5290 | 0.4971 | 0.6366 | 0.1760 | 0.0158 | CDC-like kinase 2                                     |
| 102414 | Clk3          | 0.44  | -0.41 | -0.13 | 0.25  | 0.58  | 0.3451 | 0.2036 | 0.4489 | 0.1716 | 0.0112 | CDC-like kinase 3                                     |
| 102414 | Clk3          | -0.31 | -0.31 | -0.31 | -0.32 | -0.32 | 0.6280 | 0.2982 | 0.6693 | 0.0383 | 0.0028 | CDC-like kinase 3                                     |
| 52637  | Cls1d         | 0.10  | -0.36 | -0.59 | -0.47 | -0.72 | 0.5346 | 0.1637 | 0.0277 | 0.0304 | 0.0007 | CDGSH iron sulfur domain 1                            |
| 67006  | Cls2d         | -0.08 | -0.05 | -0.18 | -0.05 | -0.03 | 0.3906 | 0.6407 | 0.4455 | 0.4353 | 0.4267 | CDGSH iron sulfur domain 2                            |
| 67006  | Cls2d         | -0.16 | -0.20 | -0.11 | -0.04 | 0.03  | 0.5422 | 0.6529 | 0.5476 | 0.4363 | 0.4092 | CDGSH iron sulfur domain 2                            |
| 67006  | Cls2d         | 0.11  | 0.28  | 0.16  | 0.04  | 0.23  | 0.5848 | 0.4815 | 0.6290 | 0.4903 | 0.0675 | CDGSH iron sulfur domain 2                            |
| 13445  | Cdk2ap1       | 0.34  | -0.17 | 0.28  | 0.75  | 1.13  | 0.4537 | 0.3964 | 0.5702 | 0.0445 | 0.0068 | CDK2 (cyclin-dependent kinase 2)-associated protein 1 |
| 52004  | Cdk2ap2       | -0.03 | -0.12 | -0.55 | -0.45 | -0.65 | 0.6708 | 0.4784 | 0.0541 | 0.0122 | 0.0008 | CDK2-associated protein 2                             |
| 63955  | Cables1       | 0.28  | -0.49 | -0.76 | 0.06  | -0.11 | 0.1968 | 0.0165 | 0.0007 | 0.4465 | 0.0703 | Cdk5 and Abl enzyme substrate 1                       |
| 252966 | Cables2       | -0.71 | -0.02 | 0.42  | -0.22 | -0.37 | 0.2132 | 0.4567 | 0.1011 | 0.2254 | 0.0703 | Cdk5 and Abl enzyme substrate 2                       |
| 66971  | Cdk5rap1      | 0.11  | -0.10 | 0.07  | 0.01  | 0.07  | 0.3699 | 0.2465 | 0.5013 | 0.5485 | 0.3123 | Cdk5 and Abl enzyme substrate 1                       |
| 68916  | Cdk5rap2      | -0.29 | -0.41 | -0.20 | -0.09 | -0.23 | 0.0590 | 0.5929 | 0.5858 | 0.5006 | 0.3249 | CDK5 regulatory subunit associated protein 1          |
| 214444 | Cdk5rap2      | -0.88 | -0.98 | 0.79  | -0.31 | -0.37 | 0.2800 | 0.4417 | 0.0946 | 0.0029 | 0.0119 | CDK5 regulatory subunit associated protein 1-like 1   |
| 214444 | Cdk5rap2      | -0.01 | -0.07 | -0.06 | -0.16 | -0.16 | 0.6891 | 0.3129 | 0.0063 | 0.0122 | 0.0002 | CDK5 regulatory subunit associated protein 2          |
| 80280  | Cdk5rap3      | -0.21 | -0.10 | -0.50 | -0.47 | -0.64 | 0.3930 | 0.4794 | 0.4788 | 0.4475 | 0.0840 | CDK5 regulatory subunit associated protein 2          |
| 80280  | Cdk5rap3      | -0.13 | -0.11 | -0.09 | 0.17  | 0.15  | 0.2575 | 0.4794 | 0.4788 | 0.4475 | 0.1073 | CDK5 regulatory subunit associated protein 3          |
| 68379  | Ciz1          | 0.03  | 0.01  | -0.06 | 0.01  | -0.06 | 0.3111 | 0.3653 | 0.1658 | 0.3820 | 0.1866 | CDKN1A interacting zinc finger protein 1              |
| 68379  | Ciz1          | -0.24 | 0.13  | 0.24  | 0.11  | -0.14 | 0.3640 | 0.4580 | 0.4558 | 0.5543 | 0.1762 | CDKN1A interacting zinc finger protein 1              |
| 70925  | Cknk2aap      | 0.48  | 1.06  | 0.48  | 0.01  | -0.10 | 0.4902 | 0.4889 | 0.0170 | 0.0359 | 0.3640 | CDKN2A interacting protein                            |
| 70925  | Cknk2aap      | -0.25 | -0.07 | -0.67 | -0.58 | -0.63 | 0.6372 | 0.5866 | 0.2773 | 0.2212 | 0.0168 | CDKN2A interacting protein                            |
| 70925  | Cknk2aap      | 0.06  | 0.13  | -0.10 | -0.13 | -0.20 | 0.3056 | 0.3629 | 0.3500 | 0.3042 | 0.0113 | CDKN2A interacting protein                            |
| 52626  | Cdnk2apnl     | 0.43  | -0.10 | 0.01  | 0.20  | 0.49  | 0.5697 | 0.5032 | 0.3198 | 0.4754 | 0.0357 | cDNA RIKEN 9330162012 gene                            |
| 493900 | 9330162012Rik | 0.17  | -0.10 | 0.10  | 0.10  | 0.17  | 0.2313 | 0.3056 | 0.6208 | 0.2497 | 0.0357 | cDNA sequence AB041803                                |
| 232685 | AB041803      | 0.08  | 0.01  | 0.01  | 0.04  | 0.05  | 0.5473 | 0.3619 | 0.3426 | 0.0756 | 0.0007 | cDNA sequence AB182283                                |
| 192950 | AB182283      | 0.14  | 0.33  | 0.33  | 0.33  | 0.32  | 0.5310 | 0.3619 | 0.3426 | 0.0756 | 0.0036 | cDNA sequence AF067063                                |
| 380978 | AF067063      | 0.16  | 0.08  | 0.16  | 0.08  | 0.12  | 0.5473 | 0.3619 | 0.3426 | 0.0756 | 0.0036 | cDNA sequence AF067063                                |
| 380978 | AF067063      | 0.10  | 0.02  | 0.23  | 0.23  | -0.11 | 0.3933 | 0.3951 | 0.3745 | 0.1992 | 0.0086 | cDNA sequence AF251705                                |
| 140497 | AF251705      | -0.82 | 0.03  | 0.03  | 0.03  | -0.48 | 0.5332 | 0.3951 | 0.3745 | 0.1992 | 0.0086 | cDNA sequence AF251705                                |
| 140497 | AF251705      | 0.26  | 0.16  | 0.17  | 0.25  | 0.34  | 0.3548 | 0.4400 | 0.5573 | 0.4234 | 0.1421 | cDNA sequence AF366264                                |
| 231201 | AF366264      | -0.11 | 0.05  | 0.02  | 0.04  | -0.03 | 0.3815 | 0.4400 | 0.5573 | 0.4234 | 0.1325 | cDNA sequence AF366264                                |
| 231201 | AF366264      | 0.09  | -0.18 | 0.06  | -0.02 | 0.10  | 0.5830 | 0.4406 | 0.5990 | 0.4567 | 0.1959 | cDNA sequence AF366264                                |
| 231201 | AF366264      | 0.10  | 0.12  | 0.02  | -0.03 | -0.08 | 0.6186 | 0.6497 | 0.4655 | 0.3622 | 0.4823 | cDNA sequence AF366264                                |
| 231201 | AF529169      | -0.01 | 0.06  | -0.01 | -0.04 | -0.01 | 0.6678 | 0.6497 | 0.4655 | 0.3622 | 0.4823 | cDNA sequence AF529169                                |
| 209743 | AK122209      | -0.04 | 0.01  | -0.04 | -0.04 | -0.04 | 0.0057 | 0.0057 | 0.0036 | 0.0411 | 0.0155 | cDNA sequence AK122209                                |
| 331623 | AK122525      | -0.28 | -0.58 | -0.67 | 0.00  | -0.35 | 0.4705 | 0.4210 | 0.2614 | 0.5602 | 0.4275 | cDNA sequence AK122525                                |
| 331623 | AK122525      | 0.03  | 0.03  | 0.15  | 0.08  | 0.10  | 0.6433 | 0.5827 | 0.4061 | 0.2809 | 0.1647 | cDNA sequence AK122525                                |
| 218343 | AK129128      | -0.24 | 0.10  | 0.13  | -0.05 | 0.05  | 0.3444 | 0.2284 | 0.2503 | 0.4806 | 0.4064 | cDNA sequence AK129128                                |
| 245522 | AK129302      | 0.18  | -0.04 | -0.03 | 0.07  | 0.07  | 0.4249 | 0.3905 | 0.3825 | 0.3886 | 0.2961 | cDNA sequence AK129302                                |
| 245522 | AK129302      | 0.06  | -0.03 | -0.08 | -0.03 | -0.03 | 0.5490 | 0.6036 | 0.4372 | 0.4787 | 0.4094 | cDNA sequence AK129302                                |
| 334915 | AK129341      | 0.47  | -0.51 | -0.66 | -0.03 | 0.06  | 0.1657 | 0.1864 | 0.0620 | 0.5214 | 0.3917 | cDNA sequence AK129341                                |
| 181157 | AK220484      | 0.26  | -0.22 | -0.13 | 0.00  | 0.12  | 0.2878 | 0.1798 | 0.1627 | 0.5566 | 0.2139 | cDNA sequence AK220484                                |
| 170939 | AY026312      | 0.03  | -0.02 | 0.06  | 0.04  | 0.03  | 0.6207 | 0.5443 | 0.4591 | 0.3946 | 0.3860 | cDNA sequence AY026312                                |
| 170798 | AY036118      | -1.16 | 0.66  | 0.44  | -0.51 | -1.21 | 0.4541 | 0.4935 | 0.0963 | 0.0015 | 0.0015 | cDNA sequence AY036118                                |
| 246735 | AY074887      | -1.49 | -0.14 | 0.50  | -0.52 | -1.10 | 0.1445 | 0.5378 | 0.2315 | 0.0279 | 0.0055 | cDNA sequence AY036118                                |
| 243910 | AY079069      | -0.27 | -0.10 | -0.18 | -0.04 | -0.07 | 0.4798 | 0.3659 | 0.3659 | 0.4480 | 0.3187 | cDNA sequence AY074887                                |
| 448986 | AY223547      | -0.26 | 0.51  | 0.33  | -0.21 | -0.40 | 0.5195 | 0.3551 | 0.0363 | 0.0034 | 0.0034 | cDNA sequence AY079069                                |
| 276676 | AY358078      | -0.06 | 0.05  | 0.20  | 0.03  | 0.02  | 0.4680 | 0.0584 | 0.1043 | 0.2898 | 0.4214 | cDNA sequence AY223547                                |
| 503556 | AY761185      | 0.02  | 0.07  | 0.10  | 0.06  | -0.06 | 0.5653 | 0.5827 | 0.2081 | 0.4852 | 0.4341 | cDNA sequence AY358078                                |
| 213811 | BC002059      | -0.04 | -0.04 | -0.16 | -0.62 | -0.58 | 0.6797 | 0.6533 | 0.5874 | 0.4692 | 0.3079 | cDNA sequence AY761185                                |
| 211556 | BC002199      | 0.73  | -0.62 | -0.41 | 0.39  | 0.66  | 0.0721 | 0.0875 | 0.3023 | 0.0778 | 0.0010 | cDNA sequence BC002059                                |
| 211556 | BC002199      | 0.10  | -0.10 | 0.01  | 0.07  | 0.08  | 0.4909 | 0.3206 | 0.5759 | 0.3559 | 0.0036 | cDNA sequence BC002199                                |
| 217827 | BC002230      | -0.36 | 0.63  | 0.61  | 0.39  | 0.40  | 0.1544 | 0.0190 | 0.0157 | 0.0052 | 0.3284 | cDNA sequence BC002230                                |
| 80284  | BC003266      | -0.75 | 0.34  | -0.40 | -0.44 | -0.97 | 0.3734 | 0.2554 | 0.6122 | 0.0322 | 0.0005 | cDNA sequence BC003266                                |
| 233987 | BC003267      | -0.05 | -0.26 | -0.17 | -0.10 | -0.09 | 0.6374 | 0.4649 | 0.5896 | 0.3353 | 0.3129 | cDNA sequence BC003267                                |
| 226499 | BC003331      | 0.20  | 0.20  | -0.06 | -0.29 | -0.17 | 0.5513 | 0.6477 | 0.4313 | 0.0248 | 0.0786 | cDNA sequence BC003331                                |
| 226499 | BC003331      | 0.07  | 0.42  | 0.03  | -0.28 | -0.11 | 0.6364 | 0.3186 | 0.6321 | 0.0387 | 0.3411 | cDNA sequence BC003331                                |
| 225215 | BC003885      | -0.53 | 0.08  | 0.18  | 0.24  | 0.11  | 0.4924 | 0.3821 | 0.3148 | 0.0796 | 0.0214 | cDNA sequence BC003885                                |
| 192173 | BC003940      | -0.86 | 0.16  | -0.08 | -0.26 | -0.50 | 0.2234 |        |        |        |        |                                                       |

|        |          |       |       |       |       |       |        |        |        |        |                        |
|--------|----------|-------|-------|-------|-------|-------|--------|--------|--------|--------|------------------------|
| 218236 | BC010304 | -0.35 | -0.43 | -0.89 | -1.03 | -0.96 | 0.4896 | 0.5386 | 0.2313 | 0.0123 | 0.0090                 |
| 407930 | BC010981 | 0.03  | 0.44  | 0.89  | 0.45  | 0.61  | 0.6767 | 0.4177 | 0.0433 | 0.0084 | cDNA sequence BC010304 |
| 224823 | BC011248 | -0.21 | 0.32  | 0.03  | 0.10  | 0.07  | 0.4701 | 0.0857 | 0.3529 | 0.3503 | cDNA sequence BC010981 |
| 224893 | BC011426 | -0.16 | -0.21 | -0.34 | -0.26 | -0.26 | 0.3963 | 0.3341 | 0.0587 | 0.0291 | cDNA sequence BC011248 |
| 224893 | BC011426 | 0.07  | -0.70 | -0.88 | -0.93 | -0.93 | 0.6433 | 0.0210 | 0.0037 | 0.0013 | cDNA sequence BC011426 |
| 232448 | BC011487 | -0.02 | -0.10 | 0.11  | -0.02 | 0.07  | 0.6459 | 0.4969 | 0.2142 | 0.4769 | cDNA sequence BC011487 |
| 215751 | BC013529 | 0.75  | -0.30 | -0.01 | 0.54  | 0.96  | 0.0706 | 0.3816 | 0.6019 | 0.0071 | cDNA sequence BC013529 |
| 230787 | BC013712 | -0.65 | -0.44 | -0.08 | -0.16 | 0.04  | 0.4311 | 0.6324 | 0.4403 | 0.3590 | cDNA sequence BC013712 |
| 236149 | BC014805 | 0.03  | -0.06 | 0.01  | 0.09  | -0.01 | 0.6131 | 0.5526 | 0.5435 | 0.3315 | cDNA sequence BC014805 |
| 236149 | BC014805 | -0.02 | 0.00  | -0.02 | 0.00  | -0.09 | 0.6557 | 0.5133 | 0.4412 | 0.5555 | cDNA sequence BC014805 |
| 234669 | BC015286 | 0.20  | -0.13 | -0.10 | 0.18  | 0.08  | 0.4666 | 0.2813 | 0.2749 | 0.1624 | cDNA sequence BC015286 |
| 234669 | BC015286 | 0.12  | -0.29 | -0.38 | 0.12  | -0.09 | 0.5724 | 0.1211 | 0.0410 | 0.4292 | cDNA sequence BC015286 |
| 234586 | BC016201 | 1.70  | -2.26 | -2.44 | -0.32 | -0.35 | 0.4754 | 0.3563 | 0.3029 | 0.0082 | cDNA sequence BC016201 |
| 105203 | BC016423 | 0.39  | -0.23 | -0.18 | 0.15  | 0.23  | 0.1147 | 0.2129 | 0.1592 | 0.1925 | cDNA sequence BC016423 |
| 105203 | BC016423 | -0.05 | -0.02 | 0.11  | -0.01 | 0.07  | 0.5958 | 0.5619 | 0.1889 | 0.5487 | cDNA sequence BC016423 |
| 105203 | BC016423 | 0.11  | -0.60 | -0.77 | -0.75 | -0.94 | 0.6003 | 0.0666 | 0.0106 | 0.0054 | cDNA sequence BC016423 |
| 225994 | BC016495 | -0.10 | -0.13 | -0.17 | 0.07  | 0.04  | 0.5954 | 0.6437 | 0.6134 | 0.4534 | cDNA sequence BC016495 |
| 211039 | BC016548 | 0.01  | 0.06  | -0.01 | -0.07 | 0.00  | 0.6753 | 0.5840 | 0.5683 | 0.2786 | cDNA sequence BC016548 |
| 233913 | BC017158 | 0.31  | -0.24 | -1.05 | -0.59 | -0.17 | 0.5987 | 0.4570 | 0.5785 | 0.5187 | cDNA sequence BC017158 |
| 170748 | BC017612 | 0.31  | -0.42 | -0.79 | -0.05 | -0.97 | 0.3260 | 0.1745 | 0.0015 | 0.0014 | cDNA sequence BC017612 |
| 217370 | BC017643 | -0.50 | -0.93 | -0.93 | -0.72 | -1.01 | 0.4048 | 0.6007 | 0.5612 | 0.0024 | cDNA sequence BC017643 |
| 216971 | BC017647 | 0.20  | -0.15 | 0.09  | 0.24  | 0.30  | 0.2707 | 0.1841 | 0.5491 | 0.0556 | cDNA sequence BC017647 |
| 449000 | BC018101 | -0.14 | -0.29 | -0.42 | -0.69 | -0.62 | 0.5906 | 0.5346 | 0.1580 | 0.0523 | cDNA sequence BC018101 |
| 235044 | BC018242 | -0.14 | -0.29 | -0.42 | -0.78 | -0.62 | 0.5597 | 0.2630 | 0.2452 | 0.0017 | cDNA sequence BC018242 |
| 218333 | BC018507 | -0.23 | 0.02  | -0.04 | -0.15 | -0.06 | 0.2087 | 0.3848 | 0.5640 | 0.0663 | cDNA sequence BC018507 |
| 218333 | BC018507 | -1.48 | 0.42  | 0.31  | -0.76 | -0.86 | 0.1192 | 0.2268 | 0.2471 | 0.0012 | cDNA sequence BC018507 |
| 234138 | BC018943 | 0.27  | -0.26 | 0.14  | 0.34  | 0.23  | 0.4478 | 0.1698 | 0.5809 | 0.4015 | cDNA sequence BC018943 |
| 234138 | BC018943 | 0.07  | 0.14  | 0.34  | 0.23  | 0.47  | 0.5913 | 0.5793 | 0.1571 | 0.0557 | cDNA sequence BC018943 |
| 234138 | BC018943 | -0.03 | -0.05 | -0.03 | 0.02  | 0.13  | 0.6596 | 0.6502 | 0.5966 | 0.4910 | cDNA sequence BC018943 |
| 252975 | BC020002 | -0.23 | -0.07 | 0.05  | 0.11  | 0.18  | 0.3394 | 0.3420 | 0.5427 | 0.2965 | cDNA sequence BC020002 |
| 252975 | BC020002 | 0.24  | -0.11 | 0.06  | 0.21  | 0.12  | 0.3629 | 0.2974 | 0.5835 | 0.0466 | cDNA sequence BC020002 |
| 228786 | BC020535 | -0.93 | -0.08 | 0.11  | -0.05 | -0.20 | 0.3280 | 0.4518 | 0.3385 | 0.4787 | cDNA sequence BC020535 |
| 212483 | BC021381 | -0.40 | -0.58 | -0.46 | -0.88 | -0.88 | 0.2541 | 0.4092 | 0.0177 | 0.0435 | cDNA sequence BC021381 |
| 225283 | BC021395 | -0.57 | -0.63 | -1.22 | -0.54 | -0.90 | 0.5170 | 0.6387 | 0.4502 | 0.0128 | cDNA sequence BC021395 |
| 225283 | BC021395 | 0.14  | -0.08 | -0.99 | -0.30 | -0.27 | 0.5583 | 0.3601 | 0.4077 | 0.0308 | cDNA sequence BC021395 |
| 225283 | BC021395 | -0.05 | -0.11 | -0.99 | -0.73 | -1.16 | 0.6677 | 0.4323 | 0.0229 | 0.0061 | cDNA sequence BC021395 |
| 192653 | BC021608 | 0.02  | -0.02 | -0.06 | -0.32 | -0.16 | 0.6847 | 0.4162 | 0.3239 | 0.4036 | cDNA sequence BC021608 |
| 225984 | BC021614 | -0.21 | 0.39  | 0.31  | 0.17  | -0.01 | 0.2799 | 0.0788 | 0.3247 | 0.1704 | cDNA sequence BC021614 |
| 215928 | BC021785 | 0.14  | -0.08 | 0.05  | 0.10  | 0.06  | 0.3089 | 0.3039 | 0.4642 | 0.2416 | cDNA sequence BC021785 |
| 234978 | BC021891 | 0.08  | 0.04  | -0.08 | -0.06 | -0.23 | 0.6167 | 0.5488 | 0.3816 | 0.2587 | cDNA sequence BC021891 |
| 234978 | BC021891 | -0.01 | -0.20 | -0.13 | -0.03 | 0.06  | 0.6365 | 0.4613 | 0.3025 | 0.4422 | cDNA sequence BC021891 |
| 192970 | BC022224 | 0.23  | 0.20  | 0.35  | 0.18  | 0.03  | 0.6976 | 0.2163 | 0.3475 | 0.5146 | cDNA sequence BC022224 |
| 224093 | BC022623 | 0.04  | 0.16  | -0.11 | -0.05 | -0.27 | 0.3583 | 0.5075 | 0.2117 | 0.0736 | cDNA sequence BC022623 |
| 330460 | BC022651 | 0.05  | 0.09  | -0.03 | 0.00  | -0.07 | 0.6448 | 0.1949 | 0.5798 | 0.4946 | cDNA sequence BC022651 |
| 217887 | BC022651 | 0.05  | -0.09 | -0.12 | -0.01 | 0.01  | 0.5915 | 0.5796 | 0.3997 | 0.5518 | cDNA sequence BC022651 |
| 269739 | BC022713 | -0.59 | 0.40  | 0.15  | -0.04 | 0.00  | 0.5243 | 0.0524 | 0.0420 | 0.5330 | cDNA sequence BC022713 |
| 237246 | BC022960 | -0.02 | -0.07 | 0.00  | 0.12  | -0.10 | 0.6552 | 0.6263 | 0.2994 | 0.1403 | cDNA sequence BC022960 |
| 226123 | BC023055 | 0.24  | -0.05 | -0.36 | -0.30 | 0.15  | 0.6581 | 0.5140 | 0.6171 | 0.4736 | cDNA sequence BC023055 |
| 207269 | BC023105 | -0.02 | -0.01 | 0.01  | 0.00  | -0.09 | 0.4009 | 0.3918 | 0.0487 | 0.0354 | cDNA sequence BC023105 |
| 232855 | BC023179 | 0.49  | -0.37 | -0.13 | 0.22  | 0.46  | 0.6656 | 0.5429 | 0.5837 | 0.5539 | cDNA sequence BC023179 |
| 232855 | BC023179 | 0.18  | -0.26 | -0.44 | -0.45 | -0.53 | 0.2274 | 0.1239 | 0.3400 | 0.2672 | cDNA sequence BC023179 |
| 407916 | BC023202 | 0.41  | -0.30 | -0.06 | -0.06 | 0.01  | 0.4233 | 0.1111 | 0.0136 | 0.0138 | cDNA sequence BC023202 |
| 548632 | BC023719 | -0.09 | 0.00  | 0.04  | -0.07 | -0.06 | 0.3082 | 0.1767 | 0.4277 | 0.4945 | cDNA sequence BC023719 |
| 231668 | BC023744 | 0.12  | 0.05  | 0.19  | 0.29  | 0.52  | 0.5113 | 0.6344 | 0.5078 | 0.3825 | cDNA sequence BC023719 |
| 229503 | BC023814 | -0.68 | -0.22 | -0.27 | -0.41 | -0.61 | 0.5325 | 0.5995 | 0.5024 | 0.0613 | cDNA sequence BC023814 |
| 231123 | BC023882 | -0.32 | 0.11  | 0.07  | -0.15 | -0.27 | 0.2027 | 0.6190 | 0.6403 | 0.0015 | cDNA sequence BC023814 |
| 212943 | BC023882 | 0.05  | 0.94  | 1.07  | 0.66  | 1.09  | 0.3268 | 0.6068 | 0.6360 | 0.2585 | cDNA sequence BC023814 |
| 234757 | BC024137 | -0.31 | -0.02 | -0.50 | -0.59 | -0.62 | 0.6490 | 0.0338 | 0.0063 | 0.0016 | cDNA sequence BC023882 |
| 217278 | BC024139 | 0.17  | -0.54 | -0.66 | -0.48 | -0.48 | 0.3288 | 0.4881 | 0.0796 | 0.0004 | cDNA sequence BC023882 |
| 235184 | BC024479 | 0.33  | -0.31 | -0.32 | 0.09  | 0.14  | 0.2757 | 0.0033 | 0.0003 | 0.0007 | cDNA sequence BC024139 |
| 108934 | BC024659 | 0.13  | -0.04 | -0.23 | -0.36 | -0.33 | 0.3958 | 0.3766 | 0.5961 | 0.1783 | cDNA sequence BC024479 |
| 108934 | BC024659 | 0.05  | -0.12 | -0.26 | -0.24 | -0.08 | 0.5514 | 0.4368 | 0.0970 | 0.3697 | cDNA sequence BC024479 |
| 239706 | BC024814 | -0.31 | 0.17  | 0.14  | 0.06  | 0.01  | 0.5800 | 0.3547 | 0.0513 | 0.0418 | cDNA sequence BC024659 |
| 239706 | BC024814 | 0.19  | -0.06 | 0.07  | 0.19  | 0.03  | 0.3284 | 0.2000 | 0.2129 | 0.4787 | cDNA sequence BC024814 |
| 232947 | BC024868 | -0.40 | 0.48  | 0.64  | 0.25  | 0.21  | 0.3612 | 0.3612 | 0.4887 | 0.2001 | cDNA sequence BC024814 |
| 232947 | BC024868 | -0.50 | 0.74  | 0.64  | -0.10 | -0.10 | 0.1913 | 0.0836 | 0.1084 | 0.0539 | cDNA sequence BC024868 |
| 232947 | BC024868 | -0.33 | 0.99  | 0.22  | -0.37 | -0.79 | 0.4188 | 0.0386 | 0.5333 | 0.1899 | cDNA sequence BC024868 |
| 215723 | BC025076 | -0.53 | -0.45 | -0.60 | -0.78 | -0.96 | 0.4122 | 0.6324 | 0.5312 | 0.0005 | cDNA sequence BC024997 |
| 216929 | BC025076 | 0.02  | -0.07 | -0.08 | 0.09  | -0.06 | 0.6687 | 0.3704 | 0.3186 | 0.4066 | cDNA sequence BC025076 |
| 223631 | BC025446 | 0.20  | -0.35 | -0.30 | -0.02 | 0.19  | 0.4029 | 0.0863 | 0.0947 | 0.5295 | cDNA sequence BC025446 |
| 234728 | BC025546 | 0.11  | -1.01 | -1.07 | -1.11 | -1.06 | 0.5801 | 0.0062 | 0.0027 | 0.0002 | cDNA sequence BC025446 |
| 217219 | BC025575 | -0.18 | 0.31  | 0.10  | 0.55  | -1.00 | 0.5553 | 0.2513 | 0.0547 | 0.0758 | cDNA sequence BC025575 |
| 234796 | BC025816 | -0.27 | 0.32  | 0.27  | 0.39  | 0.76  | 0.5513 | 0.2175 | 0.2096 | 0.0005 | cDNA sequence BC025816 |
| 234677 | BC026374 | 0.03  | -0.05 | -0.04 | -0.14 | 0.00  | 0.6122 | 0.5199 | 0.5528 | 0.5361 | cDNA sequence BC026374 |
| 210463 | BC026439 | 0.00  | -0.08 | -0.15 | -0.01 | -0.10 | 0.6964 | 0.4479 | 0.1467 | 0.0941 | cDNA sequence BC026439 |
| 26627  | BC026585 | -0.14 | -0.24 | -0.26 | -0.19 | -0.49 | 0.5742 | 0.2466 | 0.1611 | 0.2264 | cDNA sequence BC026585 |
| 230234 | BC026590 | -0.05 | 0.09  | 0.01  | -0.12 | -0.06 | 0.6284 | 0.6284 | 0.6344 | 0.0934 | cDNA sequence BC026590 |
| 230234 | BC026590 | 0.02  | -0.07 | 0.01  | -0.02 | -0.16 | 0.5183 | 0.5958 | 0.5598 | 0.5058 | cDNA sequence BC026590 |
| 236428 | BC026762 | -0.15 | -0.02 | -0.16 | -0.10 | -0.16 | 0.3338 | 0.6284 | 0.2145 | 0.2392 | cDNA sequence BC026762 |
| 545366 | BC026762 | -0.61 | 0.50  | 0.22  | -0.12 | -0.12 | 0.0465 | 0.2517 | 0.1459 | 0.3305 | cDNA sequence BC026762 |
| 545366 | BC026762 | 0.83  | -0.96 | -0.43 | 0.48  | 0.76  | 0.1138 | 0.0465 | 0.0678 | 0.0678 | cDNA sequence BC026762 |
| 225004 | BC027072 | 0.13  | -0.08 | 0.02  | 0.38  | 0.04  | 0.3191 | 0.2467 | 0.5820 | 0.2830 | cDNA sequence BC027072 |
| 212547 | BC027231 | 0.01  | -0.03 | 0.12  | 0.13  | 0.13  | 0.6850 | 0.6113 | 0.2404 | 0.2330 | cDNA sequence BC027231 |
| 233057 | BC027344 | 0.09  | 0.02  | 0.19  | 0.04  | 0.16  | 0.4978 | 0.5474 | 0.3629 | 0.4252 | cDNA sequence BC027344 |
| 407796 | BC027382 | 0.08  | -0.23 | -0.35 | -0.17 | -0.22 | 0.5161 | 0.0443 | 0.0109 | 0.0459 | cDNA sequence BC027382 |
| 269472 | BC027582 | -0.53 | 0.17  | 0.07  | -0.09 | -0.10 | 0.3186 | 0.2721 | 0.3298 | 0.3374 | cDNA sequence BC027582 |
| 229600 | BC028528 | 0.22  | 0.77  | 0.89  | 0.55  | 0.54  | 0.5501 | 0.2951 | 0.1596 | 0.0159 | cDNA sequence BC028528 |
| 234365 | BC028663 | 0.07  | 0.64  | 0.57  | 0.23  | 0.20  | 0.4489 | 0.0288 | 0.0144 | 0.1187 | cDNA sequence BC028663 |
|        |          |       |       |       |       |       | 0.6474 | 0.2616 | 0.2751 | 0.2043 |                        |

|           |          |       |       |       |       |       |        |        |        |        |                               |
|-----------|----------|-------|-------|-------|-------|-------|--------|--------|--------|--------|-------------------------------|
| 214368    | BC029127 | -0.09 | -0.17 | -0.06 | -0.22 | -0.23 | 0.5027 | 0.1718 | 0.4213 | 0.0659 | 0.0218 cDNA sequence BC029127 |
| 214368    | BC029127 | -0.08 | -0.12 | -0.12 | -0.37 | -0.30 | 0.5867 | 0.3221 | 0.2613 | 0.0127 | 0.0189 cDNA sequence BC029127 |
| 214368    | BC029127 | 0.04  | 0.02  | 0.04  | -0.01 | 0.03  | 0.5912 | 0.6188 | 0.5274 | 0.1179 | 0.3758 cDNA sequence BC029127 |
| 208659    | BC029169 | -0.07 | 0.54  | 0.33  | 0.18  | 0.22  | 0.6195 | 0.0618 | 0.3595 | 0.2199 | 0.1270 cDNA sequence BC029169 |
| 208659    | BC029169 | 0.04  | 0.59  | 0.27  | 0.17  | 0.27  | 0.6682 | 0.1633 | 0.2855 | 0.2756 | 0.0774 cDNA sequence BC029169 |
| 227622    | BC029214 | -0.05 | 0.24  | 0.06  | 0.11  | -0.03 | 0.6326 | 0.4542 | 0.5612 | 0.2655 | 0.4006 cDNA sequence BC029214 |
| 230766    | BC030183 | -0.43 | -0.31 | -0.38 | -0.52 | -0.68 | 0.2516 | 0.3907 | 0.2789 | 0.0028 | 0.0003 cDNA sequence BC030183 |
| 103220    | BC030307 | 0.23  | -0.11 | -0.30 | -0.22 | -0.28 | 0.3502 | 0.2788 | 0.0545 | 0.0330 | 0.0028 cDNA sequence BC030307 |
| 103220    | BC030307 | -0.13 | -0.12 | -0.23 | -0.16 | -0.17 | 0.4665 | 0.1821 | 0.0540 | 0.1745 | 0.1331 cDNA sequence BC030307 |
| 103220    | BC030307 | -0.03 | 0.02  | 0.08  | -0.01 | 0.02  | 0.6515 | 0.6039 | 0.4103 | 0.5366 | 0.4269 cDNA sequence BC030307 |
| 233812    | BC030336 | 0.59  | 0.03  | -0.30 | 0.19  | 0.52  | 0.1641 | 0.6230 | 0.2745 | 0.2940 | 0.0193 cDNA sequence BC030336 |
| 233812    | BC030336 | -0.17 | 0.26  | -0.30 | -0.45 | 0.01  | 0.4899 | 0.4571 | 0.0869 | 0.0310 | 0.4854 cDNA sequence BC030336 |
| 239463    | BC030396 | 0.01  | -0.14 | -0.07 | 0.02  | -0.01 | 0.6816 | 0.1186 | 0.3574 | 0.5908 | 0.4672 cDNA sequence BC030396 |
| 239368    | BC030476 | 0.09  | -0.15 | -0.27 | -0.09 | -0.06 | 0.4827 | 0.3533 | 0.0860 | 0.1919 | 0.3049 cDNA sequence BC030476 |
| 234290    | BC030500 | 0.02  | -0.03 | -0.02 | -0.13 | -0.08 | 0.6764 | 0.4144 | 0.4198 | 0.1485 | 0.2256 cDNA sequence BC030500 |
| 217216    | BC030867 | -0.17 | 0.04  | 0.04  | -0.11 | -0.24 | 0.3826 | 0.6438 | 0.6418 | 0.2821 | 0.0386 cDNA sequence BC030867 |
| 478191    | BC031181 | 0.18  | 0.14  | -0.07 | -0.38 | -0.29 | 0.5856 | 0.6030 | 0.3892 | 0.1113 | 0.1588 cDNA sequence BC031181 |
| 235493    | BC031353 | -0.22 | -0.40 | -0.58 | -0.40 | -0.55 | 0.5801 | 0.5094 | 0.0474 | 0.0081 | 0.3656 cDNA sequence BC031353 |
| 240120    | BC031441 | 0.12  | -0.40 | -0.18 | 0.37  | 0.12  | 0.5801 | 0.6240 | 0.5447 | 0.1296 | 0.0009 cDNA sequence BC031441 |
| 245622    | BC031748 | 0.02  | -0.08 | -0.04 | -0.03 | -0.04 | 0.6566 | 0.2970 | 0.6226 | 0.4124 | 0.2139 cDNA sequence BC031748 |
| 208768    | BC031781 | -0.34 | 1.03  | 0.60  | 0.04  | 0.25  | 0.4834 | 0.1733 | 0.4521 | 0.4757 | 0.0152 cDNA sequence BC031781 |
| 208768    | BC031781 | -0.15 | -0.54 | 0.04  | 0.04  | 0.04  | 0.6470 | 0.6398 | 0.3931 | 0.1439 | 0.0013 cDNA sequence BC031781 |
| 21296     | BC031901 | 0.20  | 0.01  | 0.06  | 0.13  | 0.26  | 0.2565 | 0.4952 | 0.6122 | 0.0523 | 0.0010 cDNA sequence BC031901 |
| 210882    | BC032203 | -0.24 | 0.15  | -0.05 | -0.40 | -0.63 | 0.3690 | 0.5232 | 0.4616 | 0.0385 | 0.3143 cDNA sequence BC032203 |
| 210882    | BC032203 | 0.01  | -0.10 | -0.09 | 0.03  | -0.05 | 0.6685 | 0.3170 | 0.5319 | 0.4802 | 0.4863 cDNA sequence BC032203 |
| 238024    | BC032285 | 0.06  | -0.06 | -0.04 | 0.01  | 0.00  | 0.4746 | 0.4784 | 0.5348 | 0.5384 | 0.3774 cDNA sequence BC032285 |
| 238024    | BC032285 | -0.02 | 0.05  | 0.13  | 0.01  | 0.04  | 0.6674 | 0.5777 | 0.2564 | 0.5310 | 0.0024 cDNA sequence BC032285 |
| 70861     | BC033915 | -0.17 | 0.86  | 0.78  | 0.03  | 0.12  | 0.4822 | 0.0025 | 0.0024 | 0.0992 | 0.2979 cDNA sequence BC033915 |
| 70861     | BC033915 | -0.12 | 0.05  | 0.70  | 0.54  | 0.69  | 0.6048 | 0.3906 | 0.0304 | 0.0114 | 0.0024 cDNA sequence BC033915 |
| 70861     | BC033915 | -0.05 | 0.38  | 0.82  | 0.47  | 0.56  | 0.6520 | 0.2068 | 0.0066 | 0.0313 | 0.0050 cDNA sequence BC033915 |
| 70861     | BC033915 | -0.05 | 0.55  | 0.50  | 0.51  | 0.56  | 0.6568 | 0.1068 | 0.1439 | 0.0406 | 0.0143 cDNA sequence BC033915 |
| 434325    | BC033932 | -1.43 | 0.00  | 0.06  | -0.34 | -0.61 | 0.0001 | 0.5169 | 0.3849 | 0.0213 | 0.0015 cDNA sequence BC033932 |
| 100038347 | BC034069 | -0.22 | 0.04  | -0.02 | 0.20  | 0.08  | 0.5960 | 0.4109 | 0.4097 | 0.2232 | 0.3708 cDNA sequence BC034069 |
| 207792    | BC034090 | -0.08 | -0.02 | -0.14 | -0.06 | -0.14 | 0.5725 | 0.6324 | 0.3111 | 0.4294 | 0.1815 cDNA sequence BC034090 |
| 226642    | BC034902 | 0.08  | 0.08  | 0.07  | -0.01 | -0.04 | 0.4673 | 0.3763 | 0.5195 | 0.5439 | 0.3630 cDNA sequence BC034902 |
| 212326    | BC035537 | -0.24 | 0.31  | 0.17  | -0.25 | -0.22 | 0.3080 | 0.2318 | 0.4679 | 0.1419 | 0.1924 cDNA sequence BC035537 |
| 231807    | BC037034 | -0.86 | -0.11 | -0.98 | -1.57 | -2.09 | 0.1032 | 0.6511 | 0.0421 | 0.0007 | 0.0000 cDNA sequence BC037034 |
| 231128    | BC037112 | -0.64 | 0.48  | 0.66  | 0.06  | 0.21  | 0.4105 | 0.2033 | 0.0964 | 0.4883 | 0.2176 cDNA sequence BC037112 |
| 403345    | BC037438 | -0.03 | 0.05  | 0.10  | -0.44 | -0.22 | 0.6894 | 0.5744 | 0.2148 | 0.0902 | 0.1894 cDNA sequence BC037438 |
| 242125    | BC037703 | 0.09  | 0.04  | -0.03 | 0.09  | 0.17  | 0.4944 | 0.6049 | 0.5729 | 0.3002 | 0.0161 cDNA sequence BC037703 |
| 242125    | BC037703 | 0.04  | 0.01  | -0.06 | -0.03 | 0.03  | 0.6219 | 0.6412 | 0.3814 | 0.4872 | 0.4232 cDNA sequence BC037703 |
| 227298    | BC038167 | 0.58  | -0.48 | 0.10  | -1.70 | -1.04 | 0.0760 | 0.0190 | 0.0001 | 0.0006 | 0.0000 cDNA sequence BC038167 |
| 270150    | BC038286 | -0.16 | 0.31  | 0.33  | 0.26  | 0.14  | 0.5291 | 0.2233 | 0.1872 | 0.2109 | 0.2704 cDNA sequence BC038286 |
| 239647    | BC038822 | -0.21 | 0.05  | -0.37 | -0.24 | -0.46 | 0.5539 | 0.4534 | 0.5239 | 0.1623 | 0.0169 cDNA sequence BC038822 |
| 330216    | BC038925 | -0.65 | -0.43 | -0.79 | -0.97 | -1.24 | 0.3317 | 0.6236 | 0.3775 | 0.0003 | 0.0000 cDNA sequence BC038925 |
| 234639    | BC039210 | -0.86 | 0.29  | 0.80  | 0.49  | 0.38  | 0.3039 | 0.1089 | 0.1012 | 0.0148 | 0.0175 cDNA sequence BC039210 |
| 330657    | BC039632 | 0.04  | -0.33 | -0.37 | -0.31 | -0.12 | 0.6479 | 0.1089 | 0.0535 | 0.0075 | 0.1256 cDNA sequence BC039632 |
| 414073    | BC040756 | 0.01  | 0.06  | -0.03 | 0.00  | 0.00  | 0.6746 | 0.4776 | 0.4297 | 0.5588 | 0.2074 cDNA sequence BC040756 |
| 329178    | BC042720 | 0.09  | -0.01 | -0.01 | 0.00  | 0.00  | 0.5477 | 0.4592 | 0.4699 | 0.5594 | 0.4888 cDNA sequence BC042720 |
| 329178    | BC042720 | 0.03  | -0.09 | 0.03  | -0.04 | 0.03  | 0.6281 | 0.3028 | 0.6151 | 0.4355 | 0.4100 cDNA sequence BC042720 |
| 214469    | BC043098 | -0.26 | -0.14 | 0.16  | 0.08  | 0.34  | 0.4623 | 0.6255 | 0.2398 | 0.4257 | 0.0745 cDNA sequence BC043098 |
| 224273    | BC043118 | 0.26  | -0.28 | -0.02 | 0.09  | 0.40  | 0.3808 | 0.1167 | 0.4967 | 0.4122 | 0.0280 cDNA sequence BC043118 |
| 210104    | BC043301 | -0.03 | -0.13 | -0.24 | -0.77 | -0.75 | 0.6547 | 0.0020 | 0.0028 | 0.0002 | 0.0000 cDNA sequence BC043301 |
| 381087    | BC043476 | -0.28 | 0.11  | 0.02  | -0.23 | -0.18 | 0.6227 | 0.2887 | 0.0410 | 0.0414 | 0.0362 cDNA sequence BC043476 |
| 270185    | BC043934 | 0.28  | 0.13  | 0.46  | 0.71  | 1.14  | 0.1431 | 0.5493 | 0.5263 | 0.0235 | 0.0002 cDNA sequence BC043934 |
| 230867    | BC046331 | 0.12  | -0.24 | -0.30 | -0.19 | -0.12 | 0.2304 | 0.4698 | 0.0311 | 0.0007 | 0.0000 cDNA sequence BC046331 |
| 230867    | BC046331 | -0.23 | 0.16  | -0.04 | -0.44 | -0.38 | 0.5030 | 0.6381 | 0.1059 | 0.0839 | 0.0397 cDNA sequence BC046331 |
| 192976    | BC046404 | -0.20 | -0.61 | -0.35 | -0.23 | -0.24 | 0.4616 | 0.0556 | 0.1100 | 0.1272 | 0.0030 cDNA sequence BC046404 |
| 381101    | BC048355 | 0.31  | 0.09  | -0.20 | -0.17 | -0.30 | 0.4419 | 0.5673 | 0.2576 | 0.2354 | 0.0610 cDNA sequence BC048355 |
| 270802    | BC048403 | -0.60 | 0.19  | -0.17 | -0.30 | -0.52 | 0.3140 | 0.3048 | 0.5858 | 0.1500 | 0.0424 cDNA sequence BC048403 |
| 223927    | BC048502 | 0.13  | 0.11  | 0.19  | 0.19  | 0.25  | 0.5146 | 0.6500 | 0.5139 | 0.0558 | 0.0311 cDNA sequence BC048502 |
| 408058    | BC048507 | 0.87  | -0.79 | -1.11 | -0.41 | -0.64 | 0.5892 | 0.4768 | 0.6160 | 0.5504 | 0.2505 cDNA sequence BC048502 |
| 232400    | BC048546 | 0.23  | -0.33 | -0.33 | -0.76 | -0.93 | 0.4382 | 0.4919 | 0.5322 | 0.0841 | 0.0233 cDNA sequence BC048507 |
| 434439    | BC048562 | -0.08 | 0.14  | 0.12  | -0.50 | -0.45 | 0.5764 | 0.0739 | 0.0563 | 0.0006 | 0.0001 cDNA sequence BC048546 |
| 332717    | BC048599 | 0.03  | -0.27 | -0.50 | -0.45 | -0.59 | 0.4382 | 0.4919 | 0.5322 | 0.0841 | 0.0233 cDNA sequence BC048599 |
| 330277    | BC048651 | 0.09  | 0.04  | 0.12  | 0.03  | 0.02  | 0.6293 | 0.6552 | 0.3767 | 0.5537 | 0.4711 cDNA sequence BC048651 |
| 330277    | BC048651 | 0.11  | 0.04  | 0.31  | 0.15  | 0.00  | 0.4315 | 0.6349 | 0.6353 | 0.3445 | 0.2529 cDNA sequence BC048651 |
| 243535    | BC048671 | 0.08  | 0.02  | 0.12  | -0.04 | -0.01 | 0.5407 | 0.4567 | 0.5986 | 0.4711 | 0.4829 cDNA sequence BC048671 |
| 210321    | BC048679 | 0.08  | -0.01 | 0.01  | 0.09  | 0.00  | 0.5663 | 0.4162 | 0.4357 | 0.4089 | 0.3270 cDNA sequence BC048679 |
| 234413    | BC049349 | 0.18  | -0.83 | -0.09 | 0.00  | 0.03  | 0.2682 | 0.3503 | 0.3366 | 0.5597 | 0.3887 cDNA sequence BC049349 |
| 234413    | BC049349 | 0.14  | -0.06 | -0.02 | -0.04 | 0.04  | 0.4265 | 0.4528 | 0.5194 | 0.4181 | 0.3510 cDNA sequence BC049349 |
| 277773    | BC049635 | 0.06  | -0.11 | -0.18 | 0.06  | 0.03  | 0.6425 | 0.4686 | 0.2194 | 0.3635 | 0.3914 cDNA sequence BC049635 |
| 278255    | BC049702 | -0.03 | 0.10  | 0.05  | -0.02 | -0.01 | 0.5335 | 0.3040 | 0.3005 | 0.4941 | 0.4523 cDNA sequence BC049635 |
| 320135    | BC049715 | -0.10 | 0.03  | -0.01 | -0.02 | -0.02 | 0.6213 | 0.3827 | 0.5870 | 0.4750 | 0.4298 cDNA sequence BC049702 |
| 232972    | BC049730 | 0.05  | 0.03  | -0.01 | -0.16 | -0.10 | 0.4168 | 0.4886 | 0.6122 | 0.0903 | 0.1523 cDNA sequence BC049715 |
| 193286    | BC049762 | 0.05  | 0.07  | 0.05  | -0.04 | 0.01  | 0.4765 | 0.3152 | 0.3787 | 0.4385 | 0.4809 cDNA sequence BC049730 |
| 381066    | BC049807 | -0.21 | 0.23  | -0.06 | -0.08 | -0.14 | 0.4131 | 0.1638 | 0.4968 | 0.2569 | 0.0692 cDNA sequence BC049807 |
| 237775    | BC050078 | -0.32 | -0.40 | -0.46 | -0.40 | -0.55 | 0.5046 | 0.6263 | 0.5780 | 0.0102 | 0.0013 cDNA sequence BC050078 |
| 235048    | BC050092 | 0.01  | -0.13 | -0.16 | -0.10 | -0.07 | 0.6846 | 0.4502 | 0.3465 | 0.2066 | 0.2843 cDNA sequence BC050092 |
| 235048    | BC050092 | -0.02 | 0.37  | 0.34  | -0.12 | 0.08  | 0.6856 | 0.2434 | 0.2938 | 0.3754 | 0.3803 cDNA sequence BC050092 |
| 384619    | BC050196 | 0.15  | 0.08  | -0.05 | 0.05  | -0.09 | 0.5838 | 0.3872 | 0.4708 | 0.3616 | 0.1774 cDNA sequence BC050196 |
| 384619    | BC050196 | -0.01 | 0.09  | 0.09  | -0.04 | -0.10 | 0.4363 | 0.3872 | 0.3059 | 0.3706 | 0.1621 cDNA sequence BC050196 |
| 381337    | BC050210 | 0.07  | -0.06 | -0.10 | 0.02  | -0.17 | 0.6872 | 0.6209 | 0.6075 | 0.4490 | 0.0213 cDNA sequence BC050210 |
| 381337    | BC050210 | -0.04 | -0.05 | -0.02 | 0.07  | -0.05 | 0.5196 | 0.4310 | 0.2638 | 0.4975 | 0.2997 cDNA sequence BC050210 |
| 241850    | BC050777 | 0.33  | 0.01  | 0.00  | 0.00  | 0.01  | 0.5559 | 0.6175 | 0.2907 | 0.4806 | 0.2995 cDNA sequence BC050777 |
| 57355     | BC051019 | 0.03  | -0.41 | -1.29 | -0.71 | -0.90 | 0.3462 | 0.1261 | 0.0010 | 0.0002 | 0.0003 cDNA sequence BC051019 |

|           |       |       |       |       |       |        |        |        |        |                                |
|-----------|-------|-------|-------|-------|-------|--------|--------|--------|--------|--------------------------------|
| 229688    | 0.05  | 0.11  | -0.02 | 0.00  | 0.00  | 0.5978 | 0.4957 | 0.5365 | 0.5526 | 0.4863 cDNA sequence BO051070  |
| 243090    | -0.02 | -0.02 | 0.04  | -0.06 | -0.03 | 0.6681 | 0.5244 | 0.6109 | 0.4118 | 0.4279 cDNA sequence BO051076  |
| 407788    | -0.46 | 0.03  | -0.18 | -0.28 | -0.36 | 0.1659 | 0.5084 | 0.2862 | 0.1380 | 0.0440 cDNA sequence BO051142  |
| 234384    | -0.32 | -0.07 | 0.27  | 0.15  | 0.09  | 0.1498 | 0.4162 | 0.2256 | 0.3403 | 0.3596 cDNA sequence BO051227  |
| 332713    | 0.01  | 0.16  | 0.31  | 0.08  | -0.02 | 0.6316 | 0.5829 | 0.5980 | 0.3371 | 0.4254 cDNA sequence BO051628  |
| 399568    | 0.25  | 0.23  | -0.06 | 0.13  | 0.35  | 0.5286 | 0.3871 | 0.5286 | 0.3281 | 0.0196 cDNA sequence BO051665  |
| 399568    | 0.05  | 0.23  | -0.18 | -0.17 | -0.09 | 0.4444 | 0.2281 | 0.1740 | 0.1678 | 0.0001 cDNA sequence BO052040  |
| 229433    | 0.04  | -0.03 | 0.10  | 0.10  | -0.03 | 0.6371 | 0.4130 | 0.5900 | 0.2587 | 0.4017 cDNA sequence BO052055  |
| 223433    | 0.32  | -0.50 | -0.29 | 0.27  | 0.45  | 0.2150 | 0.0349 | 0.2149 | 0.1515 | 0.0265 cDNA sequence BO052328  |
| 223433    | 0.06  | -0.19 | -0.27 | -0.02 | 0.04  | 0.5573 | 0.1584 | 0.0461 | 0.5201 | 0.3789 cDNA sequence BO052328  |
| 328783    | 0.12  | 0.02  | 0.20  | 0.24  | 0.40  | 0.3614 | 0.6213 | 0.2023 | 0.0113 | 0.0008 cDNA sequence BO052484  |
| 228783    | 0.15  | -0.03 | 0.04  | -0.15 | -0.15 | 0.3972 | 0.6511 | 0.4614 | 0.1841 | 0.1333 cDNA sequence BO052486  |
| 407814    | 0.04  | 0.06  | 0.02  | -0.04 | -0.32 | 0.5771 | 0.5105 | 0.6176 | 0.4715 | 0.4103 cDNA sequence BO053393  |
| 333193    | -0.04 | -0.40 | -0.43 | -0.26 | -0.34 | 0.6657 | 0.2459 | 0.1679 | 0.0456 | 0.0084 cDNA sequence BO053749  |
| 246747    | 0.08  | 0.02  | -0.98 | 0.11  | 0.12  | 0.5109 | 0.5567 | 0.4004 | 0.1694 | 0.1055 cDNA sequence BO054059  |
| 381680    | 0.00  | 0.02  | -0.17 | 0.07  | 0.01  | 0.2027 | 0.6191 | 0.0931 | 0.2847 | 0.3273 cDNA sequence BO055004  |
| 288709    | 1.11  | 1.51  | 1.59  | 1.61  | 2.04  | 0.0310 | 0.0049 | 0.0017 | 0.0000 | 0.0000 cDNA sequence BO055107  |
| 242602    | -0.01 | 0.07  | 0.17  | -0.06 | -0.17 | 0.6833 | 0.6113 | 0.5328 | 0.3922 | 0.1641 cDNA sequence BO055111  |
| 381306    | -0.32 | -0.03 | -0.25 | -0.68 | -0.88 | 0.1820 | 0.5970 | 0.2765 | 0.0011 | 0.0001 cDNA sequence BO055324  |
| 414077    | -0.55 | 0.24  | -0.10 | -0.51 | -0.82 | 0.2526 | 0.5560 | 0.5058 | 0.0485 | 0.0017 cDNA sequence BO056474  |
| 414077    | -0.02 | 0.22  | 0.40  | 0.00  | 0.16  | 0.6761 | 0.5183 | 0.2182 | 0.5630 | 0.1013 cDNA sequence BO056474  |
| 227358    | 0.02  | -0.04 | 0.08  | -0.01 | 0.00  | 0.6667 | 0.4852 | 0.3410 | 0.5385 | 0.4822 cDNA sequence BO056923  |
| 433940    | -0.29 | -0.08 | -0.51 | -0.88 | -1.13 | 0.3779 | 0.6320 | 0.0390 | 0.0051 | 0.0002 cDNA sequence BO057022  |
| 230393    | 0.05  | -0.08 | 0.17  | -0.08 | -0.13 | 0.3463 | 0.3039 | 0.2599 | 0.3284 | 0.1696 cDNA sequence BO057079  |
| 236573    | -0.08 | 0.00  | 0.21  | -0.21 | -0.10 | 0.6141 | 0.4216 | 0.5051 | 0.1632 | 0.2699 cDNA sequence BO057170  |
| 194237    | 0.16  | -0.19 | -0.24 | 0.29  | 0.33  | 0.6409 | 0.2788 | 0.5503 | 0.2365 | 0.0938 cDNA sequence BO057170  |
| 212123    | 0.08  | -0.04 | 0.08  | -0.13 | 0.09  | 0.3280 | 0.1794 | 0.1737 | 0.1669 | 0.4204 cDNA sequence BO057371  |
| 272027    | 0.05  | 0.11  | 0.08  | -0.11 | 0.06  | 0.4994 | 0.5734 | 0.3865 | 0.0015 | 0.0003 cDNA sequence BO057552  |
| 385138    | 0.11  | 0.16  | 0.08  | 0.44  | 0.44  | 0.2757 | 0.1088 | 0.0663 | 0.1223 | 0.3783 cDNA sequence BO057893  |
| 230076    | -0.37 | 0.20  | -0.05 | 0.11  | -0.25 | 0.3355 | 0.3865 | 0.6417 | 0.3703 | 0.1745 cDNA sequence BO059842  |
| 212516    | -0.44 | 0.14  | -0.47 | -0.53 | -0.90 | 0.3764 | 0.3033 | 0.4748 | 0.0062 | 0.0002 cDNA sequence BO060267  |
| 244654    | 0.20  | -0.08 | 0.15  | 0.28  | 0.14  | 0.4120 | 0.6206 | 0.2094 | 0.1136 | 0.1972 cDNA sequence BO060632  |
| 682222    | -0.05 | 0.01  | -0.06 | -0.01 | -0.02 | 0.5765 | 0.5566 | 0.5727 | 0.5345 | 0.4486 cDNA sequence BO061039  |
| 381350    | -0.11 | -0.04 | 0.05  | -0.01 | 0.11  | 0.6108 | 0.4009 | 0.5666 | 0.3617 | 0.3071 cDNA sequence BO061194  |
| 381724    | 0.04  | -0.04 | -0.07 | 0.02  | -0.10 | 0.5830 | 0.6321 | 0.6012 | 0.4634 | 0.0626 cDNA sequence BO061237  |
| 0601237   | -0.04 | 0.02  | -0.02 | -0.03 | -0.12 | 0.3916 | 0.3916 | 0.4588 | 0.3337 | 0.2279 cDNA sequence BO061237  |
| 385138    | 0.03  | -0.04 | -0.08 | 0.11  | 0.14  | 0.3734 | 0.5409 | 0.3313 | 0.2238 | 0.1058 cDNA sequence BO062109  |
| 331503    | 0.03  | 0.13  | -0.05 | 0.03  | 0.03  | 0.5803 | 0.5803 | 0.3247 | 0.4547 | 0.4150 cDNA sequence BO062109  |
| 331503    | 0.09  | 0.13  | -0.05 | 0.03  | 0.03  | 0.5130 | 0.5130 | 0.3247 | 0.4547 | 0.0161 cDNA sequence BO062127  |
| 331188    | -0.18 | 0.06  | 0.03  | -0.22 | -0.25 | 0.2749 | 0.3340 | 0.4238 | 0.3667 | 0.0814 cDNA sequence BO062127  |
| 331188    | -0.17 | -0.28 | -0.28 | -0.14 | -0.15 | 0.3530 | 0.0235 | 0.0258 | 0.0429 | 0.0614 cDNA sequence BO063263  |
| 341778    | 0.03  | -0.05 | -0.04 | -0.19 | -0.14 | 0.3851 | 0.5562 | 0.5502 | 0.0429 | 0.0005 cDNA sequence BO064033  |
| 208164    | 0.19  | -0.48 | -0.44 | -0.17 | -0.36 | 0.2402 | 0.0359 | 0.0114 | 0.1288 | 0.2169 cDNA sequence BO064078  |
| 408064    | 0.33  | -0.13 | -0.04 | -0.13 | -0.15 | 0.4820 | 0.5440 | 0.4542 | 0.3303 | 0.0007 cDNA sequence BO065085  |
| 219148    | 0.12  | -0.12 | 0.22  | 0.55  | 0.94  | 0.5514 | 0.3476 | 0.4346 | 0.0329 | 0.0000 cDNA sequence BO065397  |
| 386230    | -0.78 | -0.51 | -0.77 | -1.12 | -1.29 | 0.0914 | 0.2196 | 0.0267 | 0.0001 | 0.0015 cDNA sequence BO065397  |
| 386230    | -0.24 | -0.16 | -0.27 | -0.37 | -0.37 | 0.1614 | 0.0886 | 0.0291 | 0.0180 | 0.1838 cDNA sequence BO066028  |
| 407812    | -0.01 | 0.23  | 0.11  | 0.09  | 0.08  | 0.6669 | 0.1044 | 0.3551 | 0.1837 | 0.1838 cDNA sequence BO066028  |
| 240066    | 0.17  | -0.40 | -0.56 | -0.23 | -0.40 | 0.3601 | 0.0149 | 0.0046 | 0.0549 | 0.0037 cDNA sequence BO066107  |
| 240066    | -0.22 | -0.33 | -0.35 | -0.29 | -0.38 | 0.4719 | 0.5378 | 0.4745 | 0.0073 | 0.0037 cDNA sequence BO066107  |
| 271887    | 0.15  | -0.02 | -0.04 | 0.02  | -0.04 | 0.5022 | 0.4020 | 0.3657 | 0.4831 | 0.4189 cDNA sequence BO067047  |
| 277360    | 0.53  | 0.03  | 0.24  | 0.26  | 0.47  | 0.4487 | 0.1073 | 0.0081 | 0.0017 | 0.0052 cDNA sequence BO067047  |
| 408066    | 0.01  | -0.23 | -0.56 | -0.34 | -0.48 | 0.6778 | 0.4960 | 0.6181 | 0.4613 | 0.4328 cDNA sequence BO067074  |
| 238037    | -0.28 | -0.08 | -0.17 | -0.40 | -0.51 | 0.2059 | 0.3891 | 0.1649 | 0.0060 | 0.0008 cDNA sequence BO068157  |
| 730772    | -0.05 | -0.03 | 0.10  | -0.09 | -0.19 | 0.5228 | 0.5386 | 0.3534 | 0.2435 | 0.0193 cDNA sequence BO068281  |
| 237403    | -0.93 | 0.06  | 0.02  | 0.05  | -0.02 | 0.6152 | 0.5529 | 0.6433 | 0.3635 | 0.4403 cDNA sequence BO072620  |
| 432940    | -0.03 | 0.59  | 0.48  | -0.18 | -0.12 | 0.2984 | 0.1471 | 0.1586 | 0.2939 | 0.3132 cDNA sequence BO072620  |
| 382010    | -0.83 | 0.13  | 0.08  | -0.07 | -0.02 | 0.2989 | 0.2654 | 0.4871 | 0.3053 | 0.4298 cDNA sequence BO088983  |
| 280621    | -0.14 | 0.13  | 0.05  | -0.04 | -0.05 | 0.5446 | 0.5286 | 0.5921 | 0.4285 | 0.3167 cDNA sequence BO088491  |
| 216454    | 0.11  | 0.05  | 0.10  | -0.04 | -0.05 | 0.3555 | 0.4074 | 0.1370 | 0.3038 | 0.1607 cDNA sequence BO089597  |
| 3809597   | 0.22  | -0.19 | -0.33 | 0.45  | 0.23  | 0.3555 | 0.5680 | 0.5646 | 0.3738 | 0.1360 cDNA sequence BC106179  |
| 320099    | -0.04 | 0.05  | 0.06  | -0.06 | -0.09 | 0.6438 | 0.5680 | 0.4745 | 0.3091 | 0.3582 cDNA sequence BC107230  |
| 260408    | 0.14  | 0.00  | 0.01  | 0.07  | 0.03  | 0.4211 | 0.4548 | 0.4505 | 0.3091 | 0.3582 cDNA sequence BC107230  |
| 329716    | -0.05 | 0.07  | 0.12  | 0.07  | 0.01  | 0.5354 | 0.4505 | 0.2996 | 0.3258 | 0.4586 cDNA sequence BC107364  |
| 100034679 | -1.00 | 0.49  | 0.49  | 0.06  | -0.05 | 0.0413 | 0.0276 | 0.0405 | 0.5448 | 0.4407 cDNA sequence BC1179090 |
| 100034679 | -1.38 | 0.83  | 0.66  | 0.13  | 0.13  | 0.1033 | 0.0276 | 0.0319 | 0.5178 | 0.4110 cDNA sequence BC1179090 |
| 100034679 | -0.62 | 0.17  | 0.13  | -0.09 |       |        |        |        |        |                                |

|        |          |       |       |       |       |       |        |        |        |        |                                                                                     |
|--------|----------|-------|-------|-------|-------|-------|--------|--------|--------|--------|-------------------------------------------------------------------------------------|
| 67084  | Ceacam14 | 0.09  | -0.09 | -0.05 | 0.07  | -0.01 | 0.4135 | 0.3359 | 0.5343 | 0.2908 | 0.4555 CEA-related cell adhesion molecule 14                                        |
| 101434 | Ceacam15 | 0.00  | -0.04 | -0.04 | -0.01 | 0.06  | 0.6937 | 0.5371 | 0.4831 | 0.5190 | 0.2442 CEA-related cell adhesion molecule 15                                        |
| 319930 | Ceacam19 | -0.04 | 0.10  | -0.02 | 0.04  | 0.13  | 0.6016 | 0.3179 | 0.5959 | 0.4440 | 0.1658 CEA-related cell adhesion molecule 19                                        |
| 26367  | Ceacam2  | 0.04  | -0.15 | -0.16 | 0.15  | -0.07 | 0.6159 | 0.2576 | 0.1642 | 0.3622 | 0.3007 CEA-related cell adhesion molecule 19                                        |
| 26367  | Ceacam2  | -0.53 | 0.30  | 0.53  | 0.32  | 0.70  | 0.4972 | 0.5462 | 0.1573 | 0.0794 | 0.0037 CEA-related cell adhesion molecule 2                                         |
| 71601  | Ceacam20 | -0.01 | 0.13  | 0.11  | 0.09  | 0.15  | 0.6857 | 0.2213 | 0.2588 | 0.2093 | 0.0278 CEA-related cell adhesion molecule 2                                         |
| 26368  | Ceacam9  | 0.31  | 0.08  | 0.13  | 0.08  | 0.05  | 0.4933 | 0.4956 | 0.3422 | 0.3422 | 0.3196 CEA-related cell adhesion molecule 20                                        |
| 54725  | Gadmi1   | 0.03  | 0.06  | 0.02  | 0.05  | 0.01  | 0.6269 | 0.5581 | 0.6409 | 0.3743 | 0.4692 CEA-related cell adhesion molecule 9                                         |
| 54725  | Gadmi1   | 0.67  | -0.36 | -0.66 | 0.03  | -0.14 | 0.0342 | 0.1456 | 0.0026 | 0.5116 | 0.1832 cell adhesion molecule 1                                                     |
| 54725  | Gadmi1   | 0.50  | -0.42 | -0.37 | -0.39 | -0.13 | 0.1628 | 0.0820 | 0.1040 | 0.0168 | 0.1472 cell adhesion molecule 1                                                     |
| 54725  | Gadmi2   | 0.09  | -0.21 | -0.20 | -0.20 | -0.29 | 0.6650 | 0.5545 | 0.4751 | 0.3845 | 0.1479 cell adhesion molecule 1                                                     |
| 239857 | Gadmi2   | -0.08 | 0.09  | -0.01 | -0.12 | -0.01 | 0.4512 | 0.4281 | 0.5932 | 0.1810 | 0.4538 cell adhesion molecule 2                                                     |
| 94332  | Gadmi3   | -0.05 | -0.13 | -0.05 | 0.08  | -0.06 | 0.2599 | 0.3977 | 0.1859 | 0.2601 | 0.3187 cell adhesion molecule 3                                                     |
| 94332  | Gadmi3   | 0.21  | -0.09 | -0.11 | 0.10  | 0.07  | 0.2983 | 0.2921 | 0.2152 | 0.1611 | 0.2245 cell adhesion molecule 3                                                     |
| 94332  | Gadmi3   | -0.04 | 0.13  | 0.15  | 0.01  | 0.06  | 0.6131 | 0.3804 | 0.2498 | 0.5223 | 0.3072 cell adhesion molecule 3                                                     |
| 260299 | Gadmi4   | -0.11 | 0.42  | 0.11  | -0.21 | -0.40 | 0.5962 | 0.3347 | 0.6435 | 0.2718 | 0.0403 cell adhesion molecule 4                                                     |
| 12661  | Chl1     | 0.18  | -0.25 | -0.28 | 0.43  | 0.14  | 0.4765 | 0.5170 | 0.4504 | 0.2288 | 0.1135 cell adhesion molecule with homology to L1CAM                                |
| 12661  | Chl1     | 0.07  | 0.00  | -0.05 | -0.15 | -0.11 | 0.4914 | 0.5540 | 0.4091 | 0.2690 | 0.1284 cell adhesion molecule with homology to L1CAM                                |
| 57810  | Cdon     | 0.01  | 0.06  | -0.05 | 0.36  | 0.05  | 0.6797 | 0.3987 | 0.6017 | 0.5016 | 0.3347 cell adhesion molecule with homology to L1CAM                                |
| 53872  | Caprin1  | 0.81  | -0.20 | 0.05  | 0.19  | -0.03 | 0.4073 | 0.3462 | 0.1115 | 0.5016 | 0.2203 cell adhesion molecule-related/down-regulated by oncogenes                   |
| 53872  | Caprin1  | 0.63  | -0.73 | -0.93 | 0.05  | -0.21 | 0.0384 | 0.0289 | 0.0093 | 0.4932 | 0.1545 cell cycle associated protein 1                                              |
| 57754  | Cend1    | 0.12  | 0.09  | 0.13  | 0.17  | -0.37 | 0.1739 | 0.0261 | 0.0152 | 0.2882 | 0.0088 cell cycle associated protein 1                                              |
| 72278  | Cpgp1    | 0.12  | 0.00  | 0.10  | -0.02 | 0.31  | 0.4172 | 0.3896 | 0.2090 | 0.0948 | 0.0132 cell cycle associated protein 1                                              |
| 72278  | Cpgp1    | 0.86  | -0.32 | -0.21 | 0.33  | 0.50  | 0.6985 | 0.6358 | 0.6351 | 0.5076 | 0.2008 cell cycle exit and neuronal differentiation 1                               |
| 72278  | Cpgp1    | 0.23  | 0.10  | 0.09  | -0.23 | -0.08 | 0.4324 | 0.6284 | 0.2997 | 0.0704 | 0.0133 cell cycle progression 1                                                     |
| 72278  | Cpgp1    | 0.24  | -0.33 | -0.30 | -0.26 | 0.09  | 0.4918 | 0.1706 | 0.1858 | 0.0973 | 0.3013 cell cycle progression 1                                                     |
| 72278  | Cpgp1    | 0.03  | -0.32 | -0.24 | 0.11  | 0.22  | 0.6940 | 0.6095 | 0.5481 | 0.3591 | 0.3411 cell cycle progression 1                                                     |
| 105278 | Crk      | -0.42 | -0.78 | -0.83 | -0.74 | -0.81 | 0.1653 | 0.0218 | 0.0088 | 0.0014 | 0.1342 cell cycle progression 1                                                     |
| 105278 | Crk      | -0.10 | -0.38 | -0.36 | -0.24 | -0.23 | 0.5580 | 0.0069 | 0.0362 | 0.2004 | 0.0003 cell cycle related kinase                                                    |
| 14311  | Cidea    | 0.67  | -0.78 | -0.40 | 0.46  | -0.37 | 0.4584 | 0.4218 | 0.6194 | 0.3631 | 0.1507 cell cycle related kinase                                                    |
| 12683  | Cidea    | 0.98  | 0.38  | -0.10 | 0.79  | 0.64  | 0.0958 | 0.3796 | 0.5936 | 0.2171 | 0.3265 cell death-inducing DNA fragmentation factor, alpha subunit-like effector c  |
| 12684  | Cidea    | 0.27  | -0.08 | -0.10 | 0.06  | 0.08  | 0.2968 | 0.3039 | 0.2499 | 0.3839 | 0.2296 cell death-inducing DNA fragmentation factor, alpha subunit-like effector A  |
| 98828  | Cdc123   | -0.63 | 0.13  | -0.26 | -0.22 | -0.41 | 0.4820 | 0.3574 | 0.5019 | 0.1293 | 0.1784 cell death-inducing DNA fragmentation factor, alpha subunit-like effector B  |
| 98828  | Cdc123   | 0.02  | 0.20  | -0.26 | -0.43 | -0.27 | 0.6821 | 0.5022 | 0.1994 | 0.0307 | 0.0015 cell division cycle 123 homolog (S. cerevisiae)                              |
| 12534  | Cdc2a    | 0.37  | -0.49 | 0.13  | 0.27  | 0.60  | 0.1586 | 0.0385 | 0.4358 | 0.0953 | 0.0062 cell division cycle 2 homolog A (S. pombe)                                   |
| 12534  | Cdc2a    | -0.08 | 0.15  | 0.13  | -0.12 | -0.09 | 0.5736 | 0.3191 | 0.2119 | 0.3125 | 0.0062 cell division cycle 2 homolog A (S. pombe)                                   |
| 107995 | Cdc20    | 0.12  | -0.38 | 0.21  | 0.04  | 0.36  | 0.6103 | 0.2236 | 0.4292 | 0.5181 | 0.3088 cell division cycle 2 homolog A (S. pombe)                                   |
| 238896 | Cdc20b   | 0.09  | -0.04 | -0.02 | -0.02 | -0.07 | 0.5028 | 0.3992 | 0.4011 | 0.4677 | 0.1643 cell division cycle 20 homolog B (S. cerevisiae)                             |
| 12530  | Cdc25a   | 0.08  | -0.10 | -0.11 | 0.05  | 0.09  | 0.5392 | 0.5839 | 0.5381 | 0.4453 | 0.2345 cell division cycle 20 homolog B (S. cerevisiae)                             |
| 12530  | Cdc25a   | 0.06  | 0.16  | 0.44  | -0.03 | 0.05  | 0.6491 | 0.6163 | 0.3862 | 0.4825 | 0.2894 cell division cycle 25 homolog A (S. pombe)                                  |
| 12531  | Cdc25b   | 0.15  | 0.08  | -0.15 | -0.02 | 0.01  | 0.3840 | 0.6029 | 0.1726 | 0.4954 | 0.3223 cell division cycle 25 homolog A (S. pombe)                                  |
| 12531  | Cdc25b   | -0.24 | -0.27 | -0.47 | -0.20 | -0.26 | 0.5704 | 0.5961 | 0.5906 | 0.1243 | 0.4639 cell division cycle 25 homolog B (S. pombe)                                  |
| 12531  | Cdc25b   | -0.07 | 0.37  | -0.04 | -0.30 | -0.39 | 0.6226 | 0.3435 | 0.4320 | 0.0671 | 0.1477 cell division cycle 25 homolog B (S. pombe)                                  |
| 12532  | Cdc25c   | 0.05  | -0.04 | 0.12  | 0.10  | 0.18  | 0.5550 | 0.4456 | 0.3048 | 0.1980 | 0.0202 cell division cycle 25 homolog B (S. pombe)                                  |
| 12532  | Cdc25c   | 0.01  | 0.07  | 0.12  | 0.04  | 0.05  | 0.6882 | 0.3655 | 0.2073 | 0.4098 | 0.0293 cell division cycle 25 homolog C (S. pombe)                                  |
| 66440  | Cdc26    | 0.12  | -0.04 | 0.01  | 0.01  | 0.09  | 0.4288 | 0.4013 | 0.5711 | 0.5223 | 0.3031 cell division cycle 25 homolog C (S. pombe)                                  |
| 66440  | Cdc26    | -0.06 | 0.03  | 0.00  | -0.03 | -0.06 | 0.5269 | 0.6184 | 0.5753 | 0.4572 | 0.1906 cell division cycle 26                                                       |
| 66440  | Cdc26    | 0.08  | -0.16 | -0.04 | -0.08 | -0.12 | 0.5669 | 0.1315 | 0.3991 | 0.3837 | 0.3005 cell division cycle 26                                                       |
| 217232 | Cdc27    | 0.06  | -0.25 | -0.44 | -0.40 | -0.47 | 0.6217 | 0.2123 | 0.0467 | 0.0267 | 0.2079 cell division cycle 26                                                       |
| 217232 | Cdc27    | 0.33  | -0.57 | -0.30 | 0.03  | 0.04  | 0.1270 | 0.0249 | 0.0651 | 0.5008 | 0.4300 cell division cycle 27 homolog (S. cerevisiae)                               |
| 12537  | Cdc28    | 0.01  | -0.08 | -0.14 | -0.82 | -0.14 | 0.6201 | 0.0318 | 0.0464 | 0.2116 | 0.0005 cell division cycle 27 homolog (S. cerevisiae)                               |
| 12537  | Cdc28    | -0.16 | 1.62  | 1.45  | 0.28  | 0.66  | 0.6542 | 0.3871 | 0.2047 | 0.0330 | 0.0063 cell division cycle 2-like 1                                                 |
| 12537  | Cdc28    | 0.08  | 0.53  | 0.73  | 0.49  | 0.91  | 0.6542 | 0.3871 | 0.2047 | 0.0330 | 0.0002 cell division cycle 2-like 1                                                 |
| 69562  | Cdc29    | 0.20  | -0.24 | 0.13  | 0.20  | 0.25  | 0.4830 | 0.5961 | 0.2357 | 0.0702 | 0.0231 cell division cycle 2-like 5 (cholesterase-related cell division controller) |
| 69562  | Cdc29    | -0.18 | 0.93  | 1.04  | -0.41 | -0.16 | 0.5438 | 0.0326 | 0.0101 | 0.0539 | 0.2518 cell division cycle 2-like 5 (cholesterase-related cell division controller) |
| 69562  | Cdc29    | -0.05 | 0.00  | 0.14  | 0.03  | 0.25  | 0.6544 | 0.4407 | 0.6351 | 0.5098 | 0.0477 cell division cycle 2-like 5 (cholesterase-related cell division controller) |
| 78334  | Cdc26    | 0.12  | 0.17  | -0.23 | -0.03 | -0.29 | 0.5996 | 0.6322 | 0.2588 | 0.5241 | 0.0238 cell division cycle 2-like 6 (CDK8-like)                                     |
| 78334  | Cdc26    | -0.05 | -0.41 | -0.99 | -0.98 | -1.43 | 0.6682 | 0.2181 | 0.0108 | 0.0002 | 0.0000 cell division cycle 2-like 6 (CDK8-like)                                     |
| 216150 | Cdc34    | 0.40  | -0.17 | 0.42  | 0.63  | 1.05  | 0.4034 | 0.3544 | 0.3888 | 0.0952 | 0.0000 cell division cycle 2-like 6 (CDK8-like)                                     |
| 216150 | Cdc34    | -0.17 | -0.01 | 0.49  | 0.55  | 0.98  | 0.6003 | 0.4391 | 0.1245 | 0.0332 | 0.0028 cell division cycle 34 homolog (S. cerevisiae)                               |
| 12539  | Cdc37    | 0.50  | 0.26  | 0.39  | 0.63  | 0.66  | 0.2782 | 0.5731 | 0.3893 | 0.0322 | 0.0012 cell division cycle 34 homolog (S. cerevisiae)                               |
| 12539  | Cdc37    | -0.27 | 0.02  | 0.01  | 0.05  | -0.02 | 0.5168 | 0.4799 | 0.4214 | 0.4696 | 0.0110 cell division cycle 37 homolog (S. cerevisiae)                               |
| 67072  | Cdc37i1  | 0.33  | -0.38 | -0.87 | -0.49 | -0.80 | 0.3199 | 0.1099 | 0.0059 | 0.0041 | 0.4697 cell division cycle 37 homolog (S. cerevisiae)                               |
| 67072  | Cdc37i1  | -0.90 | 0.98  | 0.08  | -1.13 | -1.25 | 0.3511 | 0.3191 | 0.5617 | 0.0464 | 0.0000 cell division cycle 37 homolog (S. cerevisiae)-like 1                        |
| 67072  | Cdc37i1  | -0.40 | 0.15  | -0.44 | -0.15 | -0.07 | 0.4822 | 0.3191 | 0.6182 | 0.3336 | 0.0148 cell division cycle 37 homolog (S. cerevisiae)-like 1                        |
| 67072  | Cdc37i1  | -0.10 | 0.01  | -0.03 | -0.07 | -0.12 | 0.4938 | 0.6299 | 0.5697 | 0.3900 | 0.3781 cell division cycle 37 homolog (S. cerevisiae)-like 1                        |
| 71713  | Cdc40    | 0.40  | -0.37 | -0.33 | -0.09 | -0.12 | 0.1255 | 0.0475 | 0.0236 | 0.3419 | 0.2040 cell division cycle 37 homolog (S. cerevisiae)-like 1                        |
| 71713  | Cdc40    | -0.11 | -0.04 | -0.31 | -0.14 | 0.07  | 0.5904 | 0.5167 | 0.4751 | 0.2421 | 0.4023 cell division cycle 40 homolog (yeast)                                       |
| 12540  | Cdc42    | 0.40  | -0.65 | -0.51 | 0.29  | 0.35  | 0.0586 | 0.0684 |        |        |                                                                                     |

|        |        |         |       |       |       |       |        |        |        |        |                                                        |
|--------|--------|---------|-------|-------|-------|-------|--------|--------|--------|--------|--------------------------------------------------------|
| 67949  | Cdaa5  | -0.21   | 0.03  | 0.34  | -0.19 | -0.19 | 0.5084 | 0.6246 | 0.3734 | 0.1405 | 0.1763 cell division cycle associated 5                |
| 67949  | Cdaa5  | 0.01    | -0.03 | 0.02  | 0.00  | 0.02  | 0.6888 | 0.5222 | 0.6261 | 0.5639 | 0.4510 cell division cycle associated 5                |
| 66953  | Cdaa7  | -0.90   | -0.09 | -0.49 | -0.68 | -1.00 | 0.1878 | 0.5384 | 0.5120 | 0.0082 | 0.0004 cell division cycle associated 7                |
| 217946 | Cdaa7  | 0.16    | -0.09 | -0.08 | 0.11  | 0.11  | 0.3916 | 0.4417 | 0.4258 | 0.2221 | 0.0720 cell division cycle associated 7 like           |
| 52276  | Cdaa8  | -0.10   | 0.07  | 0.02  | -0.03 | -0.05 | 0.5112 | 0.4990 | 0.6226 | 0.4966 | 0.3882 cell division cycle associated 8                |
| 52276  | Cdaa8  | -0.20   | 0.37  | 0.37  | -0.23 | 0.09  | 0.5301 | 0.2279 | 0.4209 | 0.2371 | 0.3632 cell division cycle associated 8                |
| 52276  | Cdaa8  | 0.07    | -0.02 | 0.14  | 0.00  | 0.10  | 0.5513 | 0.5033 | 0.3714 | 0.5541 | 0.1989 cell division cycle associated 8                |
| 68567  | Cgaf1  | 0.11    | 0.25  | -0.02 | 0.17  | -0.01 | 0.5959 | 0.5957 | 0.3944 | 0.3135 | 0.4812 cell growth regulator with EF hand domain 1     |
| 68755  | Cgrr1  | -0.41   | -0.30 | -0.21 | -0.57 | -0.35 | 0.2149 | 0.2040 | 0.3574 | 0.0010 | 0.0666 cell growth regulator with ring finger domain 1 |
| 12785  | Cbtp   | -0.29   | -0.21 | 0.04  | 0.80  | 1.03  | 0.6300 | 0.5020 | 0.3947 | 0.0162 | 0.0022 cellular nucleic acid binding protein           |
| 75064  | Cbtp2  | 0.09    | 0.02  | 0.07  | -0.17 | -0.26 | 0.5619 | 0.6021 | 0.6405 | 0.1392 | 0.0148 cellular nucleic acid binding protein 2         |
| 433375 | Creg1  | 0.21    | -0.31 | -0.09 | 0.29  | 0.57  | 0.4805 | 0.4821 | 0.6002 | 0.1392 | 0.0045 cellular repressor of E1A-simulated genes 1     |
| 433375 | Creg1  | -0.18   | 0.42  | -0.34 | -0.55 | -0.73 | 0.5696 | 0.3531 | 0.1364 | 0.0802 | 0.0164 cellular repressor of E1A-simulated genes 1     |
| 433375 | Creg1  | -0.10   | 0.27  | -0.39 | -0.40 | -0.67 | 0.6336 | 0.4652 | 0.1207 | 0.1511 | 0.0212 cellular repressor of E1A-simulated genes 1     |
| 263764 | Creg2  | 0.32    | 0.08  | 0.18  | 0.25  | 0.58  | 0.1784 | 0.6462 | 0.4860 | 0.0259 | 0.0000 cellular repressor of E1A-simulated genes 2     |
| 263764 | Creg2  | 0.05    | -0.13 | -0.10 | -0.10 | -0.05 | 0.5848 | 0.3627 | 0.3011 | 0.2226 | 0.3220 cellular repressor of E1A-simulated genes 2     |
| 12903  | Crbp1  | 0.37    | 0.30  | 0.15  | 0.07  | 0.02  | 0.0643 | 0.1377 | 0.2943 | 0.3850 | 0.4316 cellular retinoic acid binding protein 1        |
| 12904  | Crbp2  | 0.00    | 0.03  | 0.09  | 0.04  | -0.01 | 0.7041 | 0.6436 | 0.5493 | 0.4370 | 0.4698 cellular retinoic acid binding protein 2        |
| 231821 | Centa1 | 0.20    | -0.03 | -0.06 | -0.01 | -0.03 | 0.4048 | 0.3718 | 0.2979 | 0.5504 | 0.3777 centaurin, alpha 1                              |
| 231821 | Centa1 | -0.09   | 0.18  | 0.08  | -0.29 | -0.49 | 0.6506 | 0.5961 | 0.4916 | 0.1880 | 0.0269 centaurin, alpha 1                              |
| 216891 | Cent2  | 0.15    | 1.04  | 1.36  | 0.54  | 0.65  | 0.5992 | 0.0792 | 0.0148 | 0.0275 | 0.3110 centaurin, beta 1                               |
| 216859 | Cent1  | 0.59    | 0.61  | -0.06 | 0.22  | 0.08  | 0.1965 | 0.2533 | 0.3944 | 0.1987 | 0.0936 centaurin, beta 1                               |
| 216859 | Cent1  | -0.10   | 0.08  | 0.24  | -0.11 | -0.18 | 0.5456 | 0.6349 | 0.4139 | 0.3353 | 0.0000 centaurin, beta 2                               |
| 78618  | Cent2  | 0.35    | 0.06  | 0.34  | 0.81  | 1.15  | 0.3268 | 0.5729 | 0.4214 | 0.0003 | 0.0001 centaurin, beta 2                               |
| 78618  | Cent2  | 0.18    | 0.07  | 0.54  | 0.79  | 0.94  | 0.4961 | 0.6083 | 0.1616 | 0.0016 | 0.0001 centaurin, beta 2                               |
| 78618  | Cent2  | -0.03   | 0.33  | 0.55  | 0.40  | 0.60  | 0.6803 | 0.0986 | 0.0248 | 0.0050 | 0.2631 centaurin, beta 2                               |
| 78618  | Cent2  | -0.05   | 0.29  | -0.31 | 0.14  | 0.14  | 0.6804 | 0.5110 | 0.6254 | 0.0991 | 0.0006 centaurin, beta 2                               |
| 140500 | Centb5 | -0.20   | -0.16 | -0.35 | -0.40 | -0.79 | 0.4297 | 0.2281 | 0.0389 | 0.0193 | 0.2344 centaurin, beta 5                               |
| 106952 | Centd2 | -0.82   | 1.22  | 0.89  | 0.34  | 0.13  | 0.0657 | 0.0050 | 0.0070 | 0.0249 | 0.0016 centaurin, delta 2                              |
| 106952 | Centd3 | -0.14   | -0.07 | -0.32 | -0.52 | -0.85 | 0.5380 | 0.4542 | 0.0582 | 0.0568 | 0.0016 centaurin, delta 3                              |
| 106952 | Centd3 | 0.11    | -0.25 | -0.30 | -0.22 | -1.29 | 0.5738 | 0.1447 | 0.1246 | 0.2123 | 0.0991 centaurin, delta 3                              |
| 216439 | Ceng1  | 0.73    | 0.20  | -0.55 | -0.84 | -0.24 | 0.3280 | 0.3902 | 0.4994 | 0.0084 | 0.0004 centaurin, gamma 1                              |
| 216439 | Ceng1  | 0.05    | -0.11 | -0.13 | -0.13 | 0.00  | 0.5863 | 0.1950 | 0.0884 | 0.1541 | 0.4885 centaurin, gamma 1                              |
| 347722 | Ceng2  | -0.19   | 0.18  | 0.93  | 0.43  | 0.67  | 0.4975 | 0.2470 | 0.0051 | 0.0252 | 0.0023 centaurin, gamma 2                              |
| 347722 | Ceng2  | -0.08   | -0.39 | 0.12  | -0.29 | -0.04 | 0.6000 | 0.0899 | 0.5696 | 0.0716 | 0.4288 centaurin, gamma 2                              |
| 213990 | Ceng3  | -0.30   | 0.10  | -0.22 | -0.15 | -0.39 | 0.3085 | 0.6084 | 0.2605 | 0.3473 | 0.0761 centaurin, gamma 3                              |
| 338349 | Ceng3  | -0.11   | 0.06  | 0.42  | 0.58  | 0.81  | 0.5882 | 0.4240 | 0.1115 | 0.0091 | 0.0009 centaurin, gamma 3                              |
| 338349 | Ceng3  | 0.39    | -0.23 | -0.21 | 0.16  | -0.08 | 0.2942 | 0.2008 | 0.1674 | 0.2263 | 0.3171 centaurin, gamma 3                              |
| 338349 | Ceng3  | -0.38   | 0.25  | -0.13 | -0.49 | -0.55 | 0.3295 | 0.1965 | 0.6425 | 0.0224 | 0.0075 centaurin, gamma 3                              |
| 338349 | Ceng3  | 0.12    | 0.20  | -0.08 | -0.24 | -0.16 | 0.5454 | 0.4372 | 0.4575 | 0.0284 | 0.0413 centaurin, gamma 3                              |
| 338349 | Ceng3  | 0.01    | -0.06 | -0.01 | -0.03 | -0.05 | 0.6912 | 0.4452 | 0.6058 | 0.4692 | 0.2649 centaurin, gamma 3                              |
| 263869 | Cen1   | -0.22   | 0.14  | 0.21  | 0.01  | -0.19 | 0.2183 | 0.3872 | 0.2048 | 0.5457 | 0.0242 centrin 1                                       |
| 263869 | Cen1   | 0.84    | -0.47 | -0.95 | 0.01  | -0.06 | 0.1086 | 0.1441 | 0.0021 | 0.5602 | 0.4311 centrin 2                                       |
| 26370  | Cen2   | -0.01   | -0.05 | -0.33 | -0.12 | -0.06 | 0.6976 | 0.4862 | 0.6271 | 0.4018 | 0.4158 centrin 2                                       |
| 12626  | Cen3   | 0.56    | -0.74 | -0.63 | -0.10 | -0.07 | 0.1240 | 0.0310 | 0.0643 | 0.4216 | 0.3874 centrin 3                                       |
| 12626  | Cen3   | 0.48    | -0.52 | -0.35 | 0.00  | -0.19 | 0.1798 | 0.1601 | 0.2347 | 0.5637 | 0.2272 centrin 3                                       |
| 207775 | Cen4   | -0.07   | -0.07 | -0.07 | -0.33 | -0.51 | 0.0394 | 0.0190 | 0.0008 | 0.0340 | 0.0007 centrin 4                                       |
| 216846 | Cenrb  | -0.33   | 0.26  | -0.07 | 0.04  | -0.43 | 0.4886 | 0.2267 | 0.4920 | 0.5269 | 0.0353 centrin 4                                       |
| 12616  | Cenpa  | -0.07   | -0.12 | -0.16 | -0.29 | -0.39 | 0.6320 | 0.3851 | 0.3375 | 0.1141 | 0.0127 centromere protein A                            |
| 12616  | Cenpb  | 0.15    | 0.92  | 1.39  | 1.94  | 2.09  | 0.5716 | 0.0385 | 0.0089 | 0.0000 | 0.0000 centromere protein B                            |
| 12617  | Cenpc1 | 0.37    | -0.41 | -0.49 | -0.24 | -0.11 | 0.1051 | 0.0651 | 0.0050 | 0.0098 | 0.0875 centromere protein C1                           |
| 12617  | Cenpc1 | 0.02    | 0.05  | 0.01  | 0.05  | 0.14  | 0.6515 | 0.4881 | 0.5963 | 0.3713 | 0.1638 centromere protein C1                           |
| 229941 | Cenpe  | -0.14   | -0.37 | -0.13 | -0.33 | -0.40 | 0.5937 | 0.2355 | 0.4753 | 0.0978 | 0.0399 centromere protein E                            |
| 229941 | Cenpe  | 0.02    | -0.03 | 0.03  | -0.01 | -0.15 | 0.6491 | 0.5707 | 0.5740 | 0.5492 | 0.2566 centromere protein E                            |
| 109000 | Cenpf  | 0.29    | -0.17 | -0.08 | -0.06 | -0.02 | 0.6650 | 0.1827 | 0.4420 | 0.4146 | 0.182 centromere protein E                             |
| 109000 | Cenpf  | 0.03    | 0.03  | -0.06 | 0.02  | 0.09  | 0.4886 | 0.3641 | 0.4050 | 0.5393 | 0.1002 centromere protein F                            |
| 26886  | Cenph  | 0.15    | 0.01  | 0.02  | -0.04 | 0.12  | 0.4961 | 0.5065 | 0.4932 | 0.4682 | 0.2088 centromere protein F                            |
| 26886  | Cenph  | 0.02    | -0.04 | -0.03 | 0.02  | 0.04  | 0.6437 | 0.6445 | 0.6150 | 0.5125 | 0.1625 centromere protein H                            |
| 102920 | Cenpi  | -0.22   | -0.15 | 0.11  | -0.20 | -0.20 | 0.3595 | 0.3631 | 0.3699 | 0.1767 | 0.3300 centromere protein H                            |
| 102920 | Cenpi  | 0.81    | -0.74 | -0.95 | -0.96 | -1.20 | 0.2510 | 0.4159 | 0.2392 | 0.0002 | 0.1041 centromere protein I                            |
| 219103 | Cenpj  | -0.24   | -0.21 | -0.18 | 0.04  | 0.08  | 0.1411 | 0.1219 | 0.1500 | 0.4148 | 0.0000 centromere protein I                            |
| 60411  | Cenpk  | -0.01   | 0.03  | -0.03 | -0.10 | -0.05 | 0.6783 | 0.5874 | 0.5899 | 0.5029 | 0.1828 centromere protein K                            |
| 60411  | Cenpk  | 0.47    | -0.55 | -0.20 | 0.07  | 0.26  | 0.0850 | 0.163  | 0.2922 | 0.3958 | 0.3337 centromere protein K                            |
| 70454  | Cenpl  | 0.18    | -0.47 | -0.19 | -0.37 | 0.01  | 0.4708 | 0.0119 | 0.1729 | 0.0432 | 0.4940 centromere protein K                            |
| 70454  | Cenpl  | 0.18    | -0.47 | -0.19 | -0.37 | 0.01  | 0.4708 | 0.0119 | 0.1729 | 0.0432 | 0.0254 centromere protein L                            |
| 66570  | Cenpm  | 0.09    | -0.13 | 0.01  | 0.05  | 0.12  | 0.5011 | 0.3516 | 0.5744 | 0.3779 | 0.4815 centromere protein L                            |
| 72155  | Cenpn  | 0.19    | -0.25 | 0.07  | 0.10  | 0.19  | 0.2695 | 0.1212 | 0.5214 | 0.2944 | 0.0978 centromere protein M                            |
| 52504  | Cenpo  | 0.31    | -0.71 | -0.99 | -0.42 | -0.58 | 0.3808 | 0.184  | 0.0028 | 0.0435 | 0.0027 centromere protein N                            |
| 52504  | Cenpo  | 0.18    | -0.12 | -0.20 | 0.02  | 0.04  | 0.4329 | 0.2145 | 0.1137 | 0.5167 | 0.0027 centromere protein O                            |
| 52504  | Cenpo  | -0.10   | 0.10  | 0.06  | -0.06 | 0.02  | 0.4346 | 0.3220 | 0.5130 | 0.3742 | 0.4216 centromere protein O                            |
| 66336  | Cenpp  | 0.28    | -0.13 | 0.05  | 0.00  | 0.08  | 0.3226 | 0.2861 | 0.5689 | 0.5634 | 0.3125 centromere protein P                            |
| 66336  | Cenpp  | -0.06</ |       |       |       |       |        |        |        |        |                                                        |

|        |        |       |       |       |       |       |        |        |        |        |                                                                                      |
|--------|--------|-------|-------|-------|-------|-------|--------|--------|--------|--------|--------------------------------------------------------------------------------------|
| 16328  | Cep250 | -0.94 | 1.08  | 0.52  | -0.63 | -0.51 | 0.0923 | 0.0072 | 0.0403 | 0.0188 | 0.0249 centrosomal protein 250                                                       |
| Cep250 |        | -0.47 | 0.10  | -0.24 | -0.34 | -0.64 | 0.2232 | 0.5438 | 0.3577 | 0.0725 | 0.0041 centrosomal protein 250                                                       |
| 66296  | Cep27  | 0.07  | 0.11  | 0.23  | 0.25  | 0.33  | 0.5241 | 0.2772 | 0.1637 | 0.0725 | 0.0019 centrosomal protein 27                                                        |
| 216274 | Cep280 | 0.14  | 0.11  | -0.02 | -0.28 | -0.09 | 0.5480 | 0.6418 | 0.4604 | 0.0364 | 0.2710 centrosomal protein 280                                                       |
| 216274 | Cep280 | 0.06  | -0.40 | -0.56 | -0.57 | -0.72 | 0.5943 | 0.0161 | 0.0026 | 0.0017 | 0.0003 centrosomal protein 280                                                       |
| 74081  | Cep350 | 0.18  | -0.83 | -0.85 | -0.80 | -0.86 | 0.4727 | 0.0146 | 0.0026 | 0.0004 | 0.0014 centrosomal protein 350                                                       |
| 74081  | Cep350 | 0.09  | 0.02  | 0.11  | 0.04  | 0.03  | 0.5373 | 0.5139 | 0.6088 | 0.4134 | 0.3975 centrosomal protein 350                                                       |
| Cep55  |        | 0.27  | -0.38 | -0.02 | -0.06 | 0.05  | 0.3280 | 0.0563 | 0.5186 | 0.3779 | 0.3558 centrosomal protein 55                                                        |
| Cep55  |        | 0.06  | 0.09  | 0.06  | 0.04  | 0.06  | 0.5796 | 0.6522 | 0.5990 | 0.4445 | 0.2971 centrosomal protein 55                                                        |
| 74107  | Cep57  | 0.09  | 0.15  | 0.37  | 0.30  | 0.40  | 0.4791 | 0.2837 | 0.1127 | 0.0111 | 0.0018 centrosomal protein 57                                                        |
| 74360  | Cep57  | -0.29 | 0.15  | -0.32 | -0.27 | -0.25 | 0.5477 | 0.4613 | 0.1577 | 0.0528 | 0.0209 centrosomal protein 57                                                        |
| Cep63  |        | -0.10 | 0.15  | -0.32 | -0.27 | -0.25 | 0.5477 | 0.4613 | 0.1577 | 0.0528 | 0.0209 centrosomal protein 57                                                        |
| 28135  | Cep63  | 0.09  | 0.08  | -0.13 | -0.01 | 0.08  | 0.5799 | 0.6451 | 0.3408 | 0.5372 | 0.2962 centrosomal protein 63                                                        |
| 216543 | Cep68  | -0.03 | -0.16 | -0.15 | -0.19 | -0.17 | 0.6425 | 0.0974 | 0.1104 | 0.1099 | 0.0691 centrosomal protein 68                                                        |
| 68121  | Cep70  | 0.37  | 0.13  | -0.12 | 0.16  | 0.25  | 0.2701 | 0.6335 | 0.2971 | 0.2409 | 0.0785 centrosomal protein 70                                                        |
| 68121  | Cep70  | 0.19  | -0.05 | -0.29 | -0.37 | -0.42 | 0.4009 | 0.3894 | 0.0947 | 0.1002 | 0.0005 centrosomal protein 70                                                        |
| 68121  | Cep70  | 0.05  | 0.14  | -0.32 | -0.31 | -0.27 | 0.6393 | 0.5428 | 0.3861 | 0.4048 | 0.0915 centrosomal protein 70                                                        |
| 74470  | Cep72  | 0.05  | 0.08  | 0.21  | 0.00  | 0.09  | 0.5882 | 0.5683 | 0.3861 | 0.5538 | 0.1061 centrosomal protein 72                                                        |
| 74470  | Cep72  | -0.05 | 0.07  | 0.11  | -0.01 | 0.00  | 0.6533 | 0.6109 | 0.6304 | 0.5533 | 0.4860 centrosomal protein 72                                                        |
| 225659 | Cep76  | 0.21  | -0.26 | -0.30 | -0.20 | -0.10 | 0.3877 | 0.1229 | 0.0550 | 0.0859 | 0.2054 centrosomal protein 76                                                        |
| 225659 | Cep76  | 0.05  | 0.01  | 0.01  | 0.03  | 0.03  | 0.5299 | 0.5224 | 0.5612 | 0.5251 | 0.3680 centrosomal protein 76                                                        |
| 209518 | Cep78  | 0.24  | -0.29 | -0.28 | 0.05  | -0.06 | 0.1285 | 0.0522 | 0.0517 | 0.4083 | 0.3680 centrosomal protein 78                                                        |
| 74201  | Cep97  | 0.26  | 0.00  | 0.24  | 0.24  | 0.50  | 0.3112 | 0.4673 | 0.4403 | 0.0248 | 0.3030 centrosomal protein 97                                                        |
| 74201  | Cep97  | 0.08  | 0.18  | 0.08  | 0.13  | 0.19  | 0.5416 | 0.2354 | 0.4606 | 0.2485 | 0.0833 centrosomal protein 97                                                        |
| 74201  | Cep97  | 0.00  | -0.11 | -0.12 | -0.09 | -0.09 | 0.7024 | 0.2704 | 0.2761 | 0.2392 | 0.1596 centrosomal protein 97                                                        |
| Csp1   |        | -0.37 | 0.17  | -0.43 | -1.27 | -0.94 | 0.4911 | 0.6423 | 0.1204 | 0.0081 | 0.0125 centrosome and spindle pole associated protein 1                              |
| 211660 | Csp1   | 0.03  | -0.01 | -0.07 | -0.06 | -0.07 | 0.6207 | 0.6277 | 0.3403 | 0.3398 | 0.2466 centrosome and spindle pole associated protein 1                              |
| 211660 | Csp1   | 0.10  | -0.56 | -0.71 | -0.06 | -0.32 | 0.6575 | 0.5595 | 0.6575 | 0.4962 | 0.1031 centrosome and spindle pole associated protein 1                              |
| 211660 | Csp1   | 0.02  | -0.01 | -0.02 | -0.03 | 0.00  | 0.6590 | 0.6299 | 0.6349 | 0.4942 | 0.4912 centrosome and spindle pole associated protein 1                              |
| 211660 | Csp1   | -0.01 | 0.03  | 0.03  | -0.09 | -0.07 | 0.6831 | 0.6444 | 0.6260 | 0.2415 | 0.2569 centrosome and spindle pole associated protein 1                              |
| 223753 | Cerk   | -0.80 | 1.04  | 1.19  | 0.95  | 1.03  | 0.0545 | 0.0030 | 0.0008 | 0.0003 | 0.0000 ceramide kinase                                                               |
| 223753 | Cerk   | 0.04  | 0.03  | -0.01 | -0.03 | 0.06  | 0.5880 | 0.6324 | 0.4863 | 0.4414 | 0.1656 ceramide kinase                                                               |
| 12622  | Cer1   | -0.02 | 0.02  | 0.11  | -0.07 | 0.15  | 0.1516 | 0.0205 | 0.0443 | 0.4013 | 0.3270 cerberus 1 homolog (Xenopus laevis)                                           |
| 12585  | Cdr2   | -0.04 | 0.96  | 1.22  | 1.00  | 0.83  | 0.6404 | 0.5786 | 0.4696 | 0.3028 | 0.0000 cerebellar degeneration-related 2                                             |
| 237988 | Cdr2l  | -0.40 | 0.03  | 0.19  | -0.01 | -0.13 | 0.3475 | 0.4028 | 0.2279 | 0.5506 | 0.1671 cerebellar degeneration-related protein 2-like                                |
| 12404  | Cbn1   | 0.08  | -0.07 | 0.05  | 0.05  | -0.01 | 0.5290 | 0.2944 | 0.6031 | 0.5504 | 0.4742 cerebellin 1 precursor protein                                                |
| 12404  | Cbn1   | -0.05 | 0.06  | 0.05  | 0.04  | -0.08 | 0.5821 | 0.4695 | 0.4124 | 0.4645 | 0.2263 cerebellin 1 precursor protein                                                |
| 12405  | Cbn2   | 0.11  | 0.01  | 0.06  | 0.03  | 0.00  | 0.5498 | 0.4463 | 0.5072 | 0.4656 | 0.4889 cerebellin 2 precursor protein                                                |
| 12405  | Cbn2   | 0.02  | 0.08  | -0.01 | -0.05 | -0.03 | 0.6433 | 0.3563 | 0.6178 | 0.3600 | 0.3970 cerebellin 2 precursor protein                                                |
| 12405  | Cbn2   | -0.02 | 0.08  | 0.08  | 0.02  | -0.05 | 0.6513 | 0.5780 | 0.5591 | 0.4937 | 0.3013 cerebellin 2 precursor protein                                                |
| 56410  | Cbn3   | 0.13  | -0.05 | -0.20 | -0.04 | -0.03 | 0.4322 | 0.5681 | 0.1295 | 0.4322 | 0.4053 cerebellin 3 precursor protein                                                |
| 56410  | Cbn3   | 0.06  | 0.03  | -0.10 | 0.01  | -0.06 | 0.5331 | 0.4963 | 0.3629 | 0.5489 | 0.3386 cerebellin 3 precursor protein                                                |
| 228942 | Cbn4   | 0.04  | 0.03  | -0.01 | -0.03 | 0.06  | 0.5880 | 0.6324 | 0.4863 | 0.4414 | 0.2599 cerebellin 4 precursor protein                                                |
| 58799  | Cbn    | 0.37  | -0.52 | -0.36 | 0.07  | 0.03  | 0.1516 | 0.0205 | 0.0443 | 0.4013 | 0.4326 crebion                                                                       |
| 58799  | Cbn    | 0.33  | -0.57 | -0.11 | 0.08  | 0.66  | 0.3153 | 0.0148 | 0.2574 | 0.4741 | 0.0032 crebion                                                                       |
| 216527 | Cernm  | -0.02 | -0.48 | -0.66 | -0.24 | -0.52 | 0.6843 | 0.0462 | 0.0088 | 0.1898 | 0.0187 cerebral cavernous malformation 2 homolog (human)                             |
| 99151  | Cin3   | 0.11  | 0.19  | 0.38  | 0.32  | 0.27  | 0.5116 | 0.2519 | 0.0742 | 0.0098 | 0.0163 cerebral endothelial cell adhesion molecule                                   |
| 12752  | Cin3   | 0.32  | -0.64 | -0.30 | -0.12 | -0.25 | 0.3892 | 0.0465 | 0.1874 | 0.3908 | 0.1073 ceroid lipofuscinosis, neuronal 3, juvenile (Batten, Spielmeier-Vogt disease) |
| 12752  | Cin3   | -0.03 | -0.03 | -0.02 | 0.02  | -0.09 | 0.6572 | 0.5734 | 0.6366 | 0.5193 | 0.3027 ceroid lipofuscinosis, neuronal 3, juvenile (Batten, Spielmeier-Vogt disease) |
| 211286 | Cin6   | 0.52  | -0.91 | -0.40 | -0.14 | -0.29 | 0.3569 | 0.0241 | 0.2004 | 0.4573 | 0.2340 ceroid lipofuscinosis, neuronal 5                                             |
| 76524  | Cin6   | -0.34 | -0.32 | -0.22 | -0.44 | -0.55 | 0.2334 | 0.1246 | 0.1859 | 0.0823 | 0.0088 ceroid lipofuscinosis, neuronal 6                                             |
| 26889  | Cin8   | 0.19  | 0.23  | 0.19  | 0.11  | 0.18  | 0.3724 | 0.4273 | 0.4942 | 0.2077 | 0.0186 ceroid lipofuscinosis, neuronal 8                                             |
| 26889  | Cin8   | 0.16  | -0.24 | -0.03 | 0.22  | 0.17  | 0.4272 | 0.4549 | 0.5961 | 0.1208 | 0.1522 ceroid lipofuscinosis, neuronal 8                                             |
| 26889  | Cin8   | -0.08 | 0.29  | 0.08  | 0.08  | -0.24 | 0.5860 | 0.1740 | 0.5709 | 0.4684 | 0.1524 ceroid lipofuscinosis, neuronal 8                                             |
| 26889  | Cin8   | -0.03 | 0.06  | 0.03  | -0.07 | 0.02  | 0.6003 | 0.5461 | 0.6087 | 0.2833 | 0.4204 ceroid lipofuscinosis, neuronal 8                                             |
| 12870  | Cp     | 0.78  | -0.50 | -0.85 | -0.08 | -0.22 | 0.1047 | 0.0909 | 0.0114 | 0.4626 | 0.2205 ceruloplasmin                                                                 |
| Figf   |        | 0.11  | 0.69  | -0.25 | -0.44 | -0.44 | 0.1498 | 0.3578 | 0.0070 | 0.0687 | 0.0193 c-fos induced growth factor                                                   |
| Cgblp1 |        | -0.50 | 0.11  | -0.69 | -0.25 | -0.44 | 0.1498 | 0.3578 | 0.0070 | 0.0687 | 0.0193 c-fos induced growth factor                                                   |
| 106143 | Cgblp1 | -0.03 | -0.62 | -0.06 | 0.32  | 0.57  | 0.6936 | 0.5580 | 0.4617 | 0.1396 | 0.0277 CGS triplet repeat binding protein 1                                          |
| Chac2  |        | 0.00  | -0.81 | -0.81 | -0.32 | -0.54 | 0.7017 | 0.3768 | 0.1038 | 0.0117 | 0.0004 Chac, calton transport regulator homolog 2 (E. coli)                          |
| 69065  | Chac1  | 0.57  | -0.07 | -0.30 | -0.04 | -0.28 | 0.1357 | 0.4561 | 0.1692 | 0.4898 | 0.0239 Chac, calton transport regulator-like 1 (E. coli)                             |
| 329954 | Calsp4 | 0.07  | -0.08 | -0.06 | 0.03  | 0.02  | 0.5768 | 0.3078 | 0.3313 | 0.4723 | 0.4431 channel, sperm associated 4                                                   |
| 67426  | Cabc1  | -0.77 | 0.35  | 0.72  | 0.62  | 0.41  | 0.2424 | 0.1820 | 0.0749 | 0.1434 | 0.0885 chaperone, ABC1 activity of bcl complex like (S. pombe)                       |
| 67426  | Cabc1  | -0.05 | 0.10  | 0.09  | 0.03  | 0.08  | 0.5777 | 0.3306 | 0.3621 | 0.5096 | 0.2527 chaperone, ABC1 activity of bcl complex like (S. pombe)                       |
| Cdc1   |        | 0.61  | -0.59 | -0.06 | 0.32  | 0.75  | 0.1350 | 0.0784 | 0.5190 | 0.1688 | 0.0049 chaperonin subunit 2 (beta)                                                   |
| Cdc2   |        | 0.11  | -0.20 |       |       |       |        |        |        |        |                                                                                      |

|        |        |       |       |       |       |       |        |        |        |        |                                                   |
|--------|--------|-------|-------|-------|-------|-------|--------|--------|--------|--------|---------------------------------------------------|
| 20296  | Ccl2   | 0.35  | 0.23  | 0.30  | 0.51  | 0.85  | 0.2689 | 0.2768 | 0.2069 | 0.0132 | 0.0001 chemokine (C-C motif) ligand 2             |
| 20296  | Ccl2   | 0.34  | 0.28  | 0.29  | 0.56  | 0.82  | 0.3574 | 0.2749 | 0.2814 | 0.0039 | 0.0000 chemokine (C-C motif) ligand 2             |
| 20296  | Ccl2   | 0.29  | 0.20  | 0.26  | 0.58  | 0.83  | 0.4496 | 0.3042 | 0.2536 | 0.0124 | 0.0000 chemokine (C-C motif) ligand 2             |
| 20296  | Ccl2   | 0.12  | 0.28  | 0.32  | 0.50  | 0.73  | 0.6323 | 0.2467 | 0.2148 | 0.0061 | 0.0000 chemokine (C-C motif) ligand 2             |
| 20297  | Ccl20  | 1.71  | 1.33  | 1.76  | 1.76  | 1.76  | 0.5309 | 0.0735 | 0.0029 | 0.0001 | 0.0000 chemokine (C-C motif) ligand 20            |
| 65956  | Cd21c  | -0.50 | -0.42 | -0.50 | -0.42 | -0.61 | 0.2132 | 0.0628 | 0.0656 | 0.3106 | 0.0070 chemokine (C-C motif) ligand 21c (leucine) |
| 20299  | Cd22   | -0.01 | -0.01 | 0.06  | 0.02  | -0.01 | 0.6773 | 0.5356 | 0.5858 | 0.5120 | 0.4806 chemokine (C-C motif) ligand 22            |
| 56221  | Cd24   | -0.52 | -0.49 | 0.25  | 0.19  | 0.19  | 0.1723 | 0.2674 | 0.2879 | 0.2726 | 0.2312 chemokine (C-C motif) ligand 24            |
| 56221  | Cd24   | 0.60  | -0.28 | -0.41 | 0.08  | -0.08 | 0.4500 | 0.6224 | 0.5537 | 0.5018 | 0.4200 chemokine (C-C motif) ligand 24            |
| 20300  | Cd25   | -0.71 | 0.21  | -0.31 | -0.79 | -0.79 | 0.0416 | 0.4493 | 0.1217 | 0.0011 | 0.0002 chemokine (C-C motif) ligand 25            |
| 20300  | Cd25   | -0.01 | -0.05 | -0.12 | 0.00  | 0.02  | 0.6897 | 0.5548 | 0.3130 | 0.5621 | 0.3939 chemokine (C-C motif) ligand 25            |
| 20301  | Cd27   | -0.51 | -0.13 | -0.47 | -0.34 | -0.43 | 0.3661 | 0.5133 | 0.5422 | 0.1800 | 0.0090 chemokine (C-C motif) ligand 27            |
| 56838  | Cd28   | -0.06 | 0.04  | -0.04 | 0.03  | 0.03  | 0.5498 | 0.4800 | 0.6434 | 0.4354 | 0.3908 chemokine (C-C motif) ligand 28            |
| 20302  | Cd3    | -0.02 | 0.66  | 0.46  | 0.37  | 0.70  | 0.6840 | 0.1219 | 0.2399 | 0.0148 | 0.0032 chemokine (C-C motif) ligand 3             |
| 20303  | Cd4    | -0.90 | 0.78  | 0.14  | -0.53 | -0.69 | 0.0946 | 0.3018 | 0.5924 | 0.0086 | 0.0045 chemokine (C-C motif) ligand 4             |
| 20304  | Cd5    | 0.06  | -0.14 | -0.20 | 0.29  | -0.21 | 0.6585 | 0.5230 | 0.5134 | 0.2230 | 0.2942 chemokine (C-C motif) ligand 5             |
| 20304  | Cd5    | -0.01 | 0.28  | 0.19  | 0.36  | -0.12 | 0.6981 | 0.3766 | 0.5236 | 0.0970 | 0.3441 chemokine (C-C motif) ligand 5             |
| 20305  | Cd6    | -0.32 | -0.58 | -0.58 | 0.04  | -0.21 | 0.4526 | 0.4062 | 0.3769 | 0.4808 | 0.1580 chemokine (C-C motif) ligand 6             |
| 20306  | Cd7    | 0.28  | 1.16  | 0.46  | 0.50  | -0.16 | 0.4444 | 0.1101 | 0.4061 | 0.0478 | 0.2113 chemokine (C-C motif) ligand 7             |
| 20306  | Cd7    | 0.25  | 0.77  | 0.40  | 0.40  | -0.19 | 0.4581 | 0.2063 | 0.4839 | 0.0131 | 0.1250 chemokine (C-C motif) ligand 7             |
| 20307  | Cd8    | 1.11  | -0.73 | -0.63 | -0.44 | -0.59 | 0.2062 | 0.1708 | 0.2443 | 0.2149 | 0.0494 chemokine (C-C motif) ligand 8             |
| 20308  | Cd9    | 0.40  | -0.15 | -0.25 | 0.12  | -0.06 | 0.4289 | 0.3999 | 0.2481 | 0.4570 | 0.4394 chemokine (C-C motif) ligand 9             |
| 12768  | Ccr1   | 0.00  | -0.00 | -0.00 | 0.09  | -0.09 | 0.7005 | 0.0963 | 0.6162 | 0.3782 | 0.2852 chemokine (C-C motif) receptor 1           |
| 12770  | Ccr11  | 0.02  | 0.01  | -0.07 | -0.02 | -0.19 | 0.4535 | 0.6537 | 0.5759 | 0.1495 | 0.1642 chemokine (C-C motif) receptor 1-like 1    |
| 12772  | Ccr2   | -0.23 | -1.06 | -0.07 | 0.03  | -0.02 | 0.6639 | 0.6409 | 0.3793 | 0.4911 | 0.0000 chemokine (C-C motif) receptor 2           |
| 12771  | Ccr3   | -0.02 | -0.55 | -0.62 | -0.01 | -0.02 | 0.4081 | 0.0035 | 0.0002 | 0.4991 | 0.0000 chemokine (C-C motif) receptor 3           |
| 12771  | Ccr3   | -0.01 | 0.00  | 0.00  | 0.00  | 0.00  | 0.0934 | 0.0397 | 0.0426 | 0.3887 | 0.0398 chemokine (C-C motif) receptor 3           |
| 12773  | Ccr4   | 0.11  | 0.00  | -0.09 | 0.04  | -0.02 | 0.6614 | 0.4684 | 0.5601 | 0.5464 | 0.1482 chemokine (C-C motif) receptor 4           |
| 12774  | Ccr5   | -0.57 | -0.79 | -0.63 | -0.59 | -0.98 | 0.5772 | 0.4892 | 0.2052 | 0.4128 | 0.3533 chemokine (C-C motif) receptor 4           |
| 12458  | Ccr6   | 0.13  | -0.19 | -0.67 | -0.83 | -1.27 | 0.5472 | 0.3232 | 0.0090 | 0.0018 | 0.0000 chemokine (C-C motif) receptor 5           |
| 12775  | Ccr7   | -0.54 | 0.16  | 0.30  | -0.34 | -0.66 | 0.1240 | 0.4961 | 0.2656 | 0.0544 | 0.0017 chemokine (C-C motif) receptor 6           |
| 12776  | Ccr8   | -0.09 | -0.06 | 0.11  | -0.05 | -0.09 | 0.4971 | 0.3415 | 0.5807 | 0.3665 | 0.1390 chemokine (C-C motif) receptor 7           |
| 12769  | Ccr9   | -0.38 | -0.27 | -0.30 | -0.17 | -0.56 | 0.2686 | 0.4869 | 0.4328 | 0.3259 | 0.0012 chemokine (C-C motif) receptor 8           |
| 252837 | Ccr11  | -0.05 | 0.09  | 0.08  | -0.05 | -0.06 | 0.5891 | 0.5929 | 0.5921 | 0.4100 | 0.3025 chemokine (C-C motif) receptor-like 1      |
| 252837 | Ccr11  | -0.01 | -0.44 | -0.74 | -0.37 | -0.71 | 0.7013 | 0.5342 | 0.2413 | 0.0239 | 0.0004 chemokine (C-C motif) receptor-like 1      |
| 54199  | Ccr12  | 0.45  | -0.43 | 0.37  | 0.16  | 0.64  | 0.4645 | 0.1318 | 0.5006 | 0.4692 | 0.1018 chemokine (C-C motif) receptor-like 2      |
| 54199  | Ccr12  | -0.49 | -0.41 | 0.04  | -0.24 | -0.26 | 0.4786 | 0.6206 | 0.3591 | 0.1399 | 0.1746 chemokine (C-C motif) receptor-like 2      |
| 20312  | Cx3e11 | -0.16 | 0.10  | 0.00  | -0.06 | -0.04 | 0.3513 | 0.3718 | 0.6021 | 0.3583 | 0.3436 chemokine (C-X3-C motif) ligand 1          |
| 20312  | Cx3e11 | -0.03 | -0.12 | -0.63 | -0.58 | -1.37 | 0.6764 | 0.4607 | 0.0131 | 0.0507 | 0.0002 chemokine (C-X3-C motif) ligand 1          |
| 13051  | Cx3e11 | 0.24  | -0.65 | -0.89 | -0.55 | -0.72 | 0.4805 | 0.4600 | 0.0049 | 0.0250 | 0.0032 chemokine (C-X3-C motif) receptor 1        |
| 13051  | Cx3e11 | 0.05  | 0.05  | 0.05  | -0.05 | -0.09 | 0.6170 | 0.5461 | 0.5846 | 0.3472 | 0.2165 chemokine (C-X3-C motif) receptor 1        |
| 14825  | Cx41   | 0.17  | -0.04 | 0.80  | 1.60  | 1.88  | 0.5589 | 0.3778 | 0.2059 | 0.0000 | 0.0000 chemokine (C-X-C motif) ligand 1           |
| 15945  | Cx41   | 0.16  | 0.54  | 1.23  | 0.90  | 1.55  | 0.5537 | 0.3290 | 0.0208 | 0.0000 | 0.0000 chemokine (C-X-C motif) ligand 10          |
| 56066  | Cxcl10 | 0.00  | 0.05  | 0.09  | -0.01 | -0.01 | 0.6984 | 0.6492 | 0.5198 | 0.5496 | 0.4334 chemokine (C-X-C motif) ligand 11          |
| 20315  | Cxcl12 | 0.24  | 0.06  | -0.07 | -0.17 | 0.02  | 0.4279 | 0.5524 | 0.3643 | 0.3177 | 0.4626 chemokine (C-X-C motif) ligand 11          |
| 20315  | Cxcl12 | 0.08  | -0.92 | -0.68 | -0.22 | -0.56 | 0.6398 | 0.0162 | 0.0587 | 0.2241 | 0.0234 chemokine (C-X-C motif) ligand 12          |
| 55885  | Cxcl13 | 0.70  | -0.62 | -0.38 | 0.77  | 0.46  | 0.3192 | 0.2770 | 0.4759 | 0.2491 | 0.2197 chemokine (C-X-C motif) ligand 13          |
| 55885  | Cxcl13 | -0.73 | -0.10 | 0.43  | 0.32  | 0.40  | 0.4514 | 0.4490 | 0.0012 | 0.0903 | 0.0882 chemokine (C-X-C motif) ligand 14          |
| 20309  | Cxcl15 | 0.78  | -0.42 | -0.74 | 0.40  | 0.33  | 0.0908 | 0.1146 | 0.0012 | 0.1327 | 0.1153 chemokine (C-X-C motif) ligand 15          |
| 20309  | Cxcl15 | 0.73  | -0.60 | -0.54 | 0.64  | 0.85  | 0.2699 | 0.1646 | 0.2789 | 0.1367 | 0.0383 chemokine (C-X-C motif) ligand 15          |
| 66102  | Cxcl16 | 1.01  | -0.28 | -0.01 | 0.57  | 0.90  | 0.1156 | 0.2828 | 0.5227 | 0.0024 | 0.0008 chemokine (C-X-C motif) ligand 16          |
| 66102  | Cxcl16 | 0.22  | 0.10  | 0.51  | 0.74  | 1.01  | 0.5715 | 0.3499 | 0.1099 | 0.0045 | 0.0002 chemokine (C-X-C motif) ligand 16          |
| 232983 | Cxcl17 | -0.42 | 0.12  | 0.02  | -0.03 | 0.19  | 0.3606 | 0.5657 | 0.4606 | 0.5304 | 0.2148 chemokine (C-X-C motif) ligand 17          |
| 20310  | Cxcl2  | 0.35  | 0.57  | 0.20  | -0.02 | 0.22  | 0.2415 | 0.0317 | 0.0024 | 0.4552 | 0.1078 chemokine (C-X-C motif) ligand 2           |
| 330122 | Cxcl3  | 0.11  | -0.07 | -0.01 | -0.02 | 0.22  | 0.3847 | 0.6107 | 0.0000 | 0.0359 | 0.0000 chemokine (C-X-C motif) ligand 3           |
| 20311  | Cxcl5  | -0.14 | 1.03  | 2.41  | 0.54  | 2.38  | 0.3877 | 0.0010 | 0.0000 | 0.4502 | 0.4311 chemokine (C-X-C motif) ligand 5           |
| 17329  | Cxcl9  | 0.24  | -0.32 | -0.03 | 0.07  | -0.03 | 0.4279 | 0.2293 | 0.6390 | 0.4502 | 0.0000 chemokine (C-X-C motif) receptor 3         |
| 12766  | Cxcl3  | 0.06  | -0.55 | -0.91 | -0.24 | -0.99 | 0.6269 | 0.0548 | 0.0062 | 0.1719 | 0.0000 chemokine (C-X-C motif) receptor 3         |
| 12767  | Cxcl4  | -0.03 | -0.28 | -0.46 | -1.02 | -1.43 | 0.6858 | 0.3404 | 0.1497 | 0.0020 | 0.0000 chemokine (C-X-C motif) receptor 4         |
| 12767  | Cxcl4  | 0.01  | -0.47 | -0.27 | -0.03 | -0.20 | 0.7005 | 0.5652 | 0.6202 | 0.5372 | 0.2090 chemokine (C-X-C motif) receptor 4         |
| 80901  | Cxcl7  | -0.65 | -0.19 | -0.40 | -0.59 | -0.97 | 0.2927 | 0.5959 | 0.5897 | 0.0147 | 0.0001 chemokine (C-X-C motif) receptor 6         |
| 59289  | Cxcl7  | 0.74  | 1.84  | 2.50  | 1.90  | 2.59  | 0.2015 | 0.0072 | 0.0012 | 0.0000 | 0.0000 chemokine (C-X-C motif) receptor 7         |
| 75458  | Cxclp2 | -0.03 | 0.00  | 0.20  | 0.46  | 0.20  | 0.6979 | 0.4107 | 0.3101 | 0.0287 | 0.1531 chemokine binding protein 2                |
| 75458  | Cxclp2 | 0.25  | -1.14 | -1.21 | -0.77 | -1.48 | 0.3886 | 0.0043 | 0.0022 | 0.0010 | 0.0000 chemokine-like factor                      |
|        |        |       |       |       |       |       |        |        |        |        |                                                   |



|        |        |       |       |       |       |       |        |        |        |        |                                                         |
|--------|--------|-------|-------|-------|-------|-------|--------|--------|--------|--------|---------------------------------------------------------|
| 78923  | Chsy3  | -0.07 | 0.03  | 0.17  | -0.01 | -0.05 | 0.5132 | 0.5359 | 0.2486 | 0.5446 | 0.3409 chondroitin sulfate synthase 3                   |
| 78923  | Chsy3  | 0.09  | -0.05 | -0.12 | 0.06  | 0.09  | 0.5395 | 0.6131 | 0.5503 | 0.3995 | 0.2412 chondroitin sulfate synthase 3                   |
| 246048 | Chodl  | -0.03 | 0.12  | 0.08  | -0.05 | 0.09  | 0.6014 | 0.3885 | 0.5354 | 0.3448 | 0.3956 chondrolectin                                    |
| 246048 | Chodl  | 0.05  | 0.06  | 0.15  | 0.12  | 0.01  | 0.6179 | 0.6179 | 0.5048 | 0.2087 | 0.4654 chondrolectin                                    |
| 12667  | Chrd   | -0.03 | -0.14 | -0.05 | 0.09  | -0.27 | 0.6734 | 0.3513 | 0.4965 | 0.4359 | 0.0363 chordin                                          |
| 83453  | Chrd1  | 0.28  | 0.66  | -0.11 | -0.39 | -0.07 | 0.4561 | 0.1372 | 0.3378 | 0.1075 | 0.4021 chordin-like 1                                   |
| 83453  | Chrd1  | 0.05  | 0.00  | -0.04 | -0.02 | -0.05 | 0.5736 | 0.6433 | 0.5100 | 0.5154 | 0.3188 chordin-like 1                                   |
| 69121  | Chrd2  | 0.00  | 0.04  | -0.04 | 0.04  | 0.14  | 0.7009 | 0.4770 | 0.6473 | 0.3695 | 0.4084 chordin-like 2                                   |
| 12663  | Chnl   | 0.00  | 0.01  | 0.02  | -0.13 | -0.07 | 0.7031 | 0.5921 | 0.6137 | 0.1911 | 0.2704 choroderma-like                                  |
| 12662  | Chnl   | -0.29 | 0.03  | 0.01  | -0.33 | -0.22 | 0.4648 | 0.6359 | 0.5838 | 0.2422 | 0.2948 choroderma                                       |
| 12662  | Chnl   | -0.34 | -0.18 | 0.09  | -0.29 | 0.23  | 0.5435 | 0.5118 | 0.3300 | 0.2758 | 0.1487 choroderma                                       |
| 12662  | Chnl   | 0.03  | 0.02  | 0.09  | -0.08 | 0.06  | 0.6187 | 0.6035 | 0.4768 | 0.2759 | 0.2296 choroderma                                       |
| 93996  | Chrac1 | -0.14 | 0.39  | 0.40  | -0.02 | 0.55  | 0.6316 | 0.5595 | 0.5345 | 0.5502 | 0.0205 chromatin accessibility complex 1                |
| 93996  | Chrac1 | 0.09  | 0.13  | 0.13  | 0.04  | 0.35  | 0.6444 | 0.6445 | 0.6303 | 0.5223 | 0.1213 chromatin accessibility complex 1                |
| 93996  | Chrac1 | 0.02  | -0.08 | 0.07  | -0.04 | 0.00  | 0.6699 | 0.2533 | 0.6111 | 0.4433 | 0.4897 chromatin assembly factor 1                      |
| 27221  | Chaf1a | -0.36 | 0.50  | 0.29  | -0.02 | 0.00  | 0.3090 | 0.2682 | 0.5112 | 0.0408 | 0.4859 chromatin assembly factor 1, subunit A (p150)    |
| 110749 | Chaf1b | -0.20 | 0.40  | 0.41  | 0.16  | 0.67  | 0.5305 | 0.4489 | 0.4500 | 0.3549 | 0.0019 chromatin assembly factor 1, subunit B (p60)     |
| 67177  | Cd11   | -0.16 | 0.35  | 0.58  | 0.37  | 0.70  | 0.5453 | 0.4440 | 0.1874 | 0.0235 | 0.0002 chromatin licensing and DNA replication factor 1 |
| 234852 | Chmp1a | -0.49 | 0.38  | 0.47  | 0.35  | 0.48  | 0.3444 | 0.1495 | 0.0770 | 0.0036 | 0.0069 chromatin modifying protein 1A                   |
| 234852 | Chmp1a | 0.01  | 0.12  | 0.31  | 0.23  | 0.36  | 0.6940 | 0.6338 | 0.2799 | 0.2236 | 0.0395 chromatin modifying protein 1A                   |
| 76064  | Chmp1b | -0.05 | -0.07 | 0.00  | -0.17 | 0.11  | 0.6594 | 0.5201 | 0.4204 | 0.3579 | 0.2027 chromatin modifying protein 1A                   |
| 68953  | Chmp2a | 0.06  | -0.49 | -0.49 | -0.07 | 0.18  | 0.6558 | 0.2944 | 0.1703 | 0.2817 | 0.2981 chromatin modifying protein 1B                   |
| 68942  | Chmp2b | -0.27 | 0.15  | 0.07  | -0.12 | 0.26  | 0.6030 | 0.4790 | 0.3499 | 0.3389 | 0.1342 chromatin modifying protein 2A                   |
| 75008  | Chmp4b | -0.02 | 0.25  | 0.46  | 0.27  | 0.61  | 0.6844 | 0.2974 | 0.0731 | 0.1079 | 0.2373 chromatin modifying protein 2B                   |
| 66371  | Chmp4c | 0.31  | -0.11 | 0.12  | 0.40  | 0.39  | 0.3595 | 0.3433 | 0.6106 | 0.0053 | 0.0049 chromatin modifying protein 4B                   |
| 66371  | Chmp4c | 0.25  | 0.61  | 0.67  | 0.27  | 0.75  | 0.5476 | 0.3749 | 0.3110 | 0.1644 | 0.0001 chromatin modifying protein 4C                   |
| 66371  | Chmp4c | 0.08  | 0.12  | -0.04 | -0.05 | 0.03  | 0.5845 | 0.6324 | 0.3900 | 0.3850 | 0.4009 chromatin modifying protein 4C                   |
| 76959  | Chmp5  | 0.37  | 0.19  | -0.47 | -0.18 | -0.19 | 0.3162 | 0.6484 | 0.0291 | 0.2940 | 0.2258 chromatin modifying protein 5                    |
| 76959  | Chmp5  | -0.31 | -0.07 | -0.77 | -0.51 | -0.78 | 0.5545 | 0.4659 | 0.4596 | 0.0460 | 0.0022 chromatin modifying protein 5                    |
| 76959  | Chmp5  | 0.02  | 0.03  | 0.07  | -0.06 | 0.01  | 0.6556 | 0.6466 | 0.5237 | 0.2672 | 0.4735 chromatin modifying protein 5                    |
| 208092 | Chmp6  | -0.06 | 0.39  | 0.67  | 0.73  | 0.98  | 0.6483 | 0.1320 | 0.0242 | 0.0004 | 0.0000 chromatin modifying protein 6                    |
| 12412  | Cbx1   | -0.26 | 0.40  | -0.47 | -0.91 | -1.09 | 0.4618 | 0.3690 | 0.0909 | 0.0007 | 0.0001 chromobox homolog 1 (Drosophila HP1 beta)        |
| 12416  | Cbx2   | -0.22 | -0.44 | -0.18 | -0.38 | -0.38 | 0.2300 | 0.0169 | 0.3141 | 0.0059 | 0.0182 chromobox homolog 2 (Drosophila Pc class)        |
| 12417  | Cbx2   | 0.05  | -0.01 | -0.05 | 0.07  | 0.05  | 0.5957 | 0.6423 | 0.5625 | 0.2658 | 0.2857 chromobox homolog 2 (Drosophila Pc class)        |
| 12417  | Cbx3   | 0.41  | -0.10 | -0.32 | -0.05 | -0.07 | 0.3111 | 0.3623 | 0.2167 | 0.4640 | 0.3897 chromobox homolog 3 (Drosophila HP1 gamma)       |
| 12417  | Cbx3   | -0.49 | 0.72  | 0.23  | -1.01 | -0.98 | 0.4531 | 0.2465 | 0.6302 | 0.0484 | 0.0249 chromobox homolog 3 (Drosophila HP1 gamma)       |
| 12418  | Cbx4   | -0.09 | 0.17  | 0.04  | -0.05 | 0.04  | 0.6246 | 0.2895 | 0.5003 | 0.3845 | 0.2344 chromobox homolog 3 (Drosophila HP1 gamma)       |
| 12419  | Cbx5   | 0.51  | -0.39 | -0.71 | -0.21 | -0.42 | 0.6083 | 0.4803 | 0.0663 | 0.1781 | 0.3217 chromobox homolog 5 (Drosophila HP1a)            |
| 12419  | Cbx5   | 0.25  | -0.11 | -0.46 | -0.41 | -0.63 | 0.3045 | 0.3536 | 0.0173 | 0.0055 | 0.0004 chromobox homolog 5 (Drosophila HP1a)            |
| 12419  | Cbx5   | 0.16  | -0.53 | -0.63 | -0.47 | -0.52 | 0.5570 | 0.0598 | 0.0346 | 0.0568 | 0.0082 chromobox homolog 5 (Drosophila HP1a)            |
| 494448 | Cbx6   | -0.48 | -0.75 | -0.79 | -1.00 | -0.76 | 0.0853 | 0.0202 | 0.0025 | 0.0022 | 0.0002 chromobox homolog 6                              |
| 494448 | Cbx6   | -1.25 | -0.11 | -0.21 | -0.25 | -0.53 | 0.3130 | 0.4465 | 0.4692 | 0.1959 | 0.0199 chromobox homolog 6                              |
| 52809  | Cbx7   | -0.63 | -1.37 | -1.33 | -1.05 | -1.02 | 0.3910 | 0.1206 | 0.0986 | 0.0016 | 0.0006 chromobox homolog 6                              |
| 30951  | Cbx8   | -0.11 | 0.06  | -0.43 | -0.44 | -0.82 | 0.5825 | 0.6381 | 0.1260 | 0.0698 | 0.0024 chromobox homolog 7                              |
| 30951  | Cbx8   | -0.22 | -1.86 | -0.50 | -0.70 | -0.77 | 0.4733 | 0.1715 | 0.1143 | 0.0063 | 0.0014 chromobox homolog 8 (Drosophila Pc class)        |
| 12648  | Chd1   | -0.12 | 0.09  | 0.20  | 0.10  | -0.22 | 0.6057 | 0.6103 | 0.5723 | 0.0730 | 0.0000 chromobox homolog 8 (Drosophila Pc class)        |
| 12648  | Chd1   | -0.12 | 0.63  | 0.59  | -0.02 | 0.43  | 0.6163 | 0.3019 | 0.3149 | 0.5448 | 0.4189 chromodomain helicase DNA binding protein 1      |
| 12648  | Chd1   | -0.09 | -0.81 | -0.80 | -0.85 | -1.11 | 0.6525 | 0.2386 | 0.2427 | 0.0025 | 0.0039 chromodomain helicase DNA binding protein 1      |
| 244059 | Chd2   | -1.12 | 0.95  | 0.40  | -0.24 | -0.46 | 0.2329 | 0.0626 | 0.1858 | 0.3289 | 0.0645 chromodomain helicase DNA binding protein 1      |
| 244059 | Chd2   | 0.32  | 0.07  | 0.95  | 1.02  | 1.38  | 0.3997 | 0.6408 | 0.0670 | 0.0032 | 0.0000 chromodomain helicase DNA binding protein 2      |
| 216848 | Chd3   | 0.12  | 0.04  | -0.11 | -0.01 | -0.05 | 0.5046 | 0.4939 | 0.5803 | 0.5303 | 0.3348 chromodomain helicase DNA binding protein 2      |
| 216848 | Chd3   | -0.59 | 0.58  | -0.30 | -0.70 | -0.71 | 0.1805 | 0.0249 | 0.3153 | 0.0719 | 0.4103 chromodomain helicase DNA binding protein 3      |
| 216848 | Chd3   | -0.99 | 1.40  | 1.04  | -0.36 | -0.11 | 0.2540 | 0.0735 | 0.1371 | 0.2678 | 0.0115 chromodomain helicase DNA binding protein 3      |
| 216848 | Chd3   | -0.15 | 0.43  | 0.26  | -0.10 | -0.10 | 0.5649 | 0.4803 | 0.6155 | 0.2551 | 0.3344 chromodomain helicase DNA binding protein 3      |
| 216848 | Chd3   | 0.19  | 0.38  | 0.19  | 0.26  | 0.47  | 0.5688 | 0.4175 | 0.5899 | 0.0540 | 0.0103 chromodomain helicase DNA binding protein 3      |
| 107932 | Chd4   | 0.36  | 0.09  | 0.33  | 0.51  | 0.50  | 0.2424 | 0.3688 | 0.0036 | 0.0010 | 0.0010 chromodomain helicase DNA binding protein 4      |
| 107932 | Chd4   | -0.75 | 0.81  | 0.98  | -0.41 | -0.04 | 0.3184 | 0.0879 | 0.0464 | 0.1164 | 0.4546 chromodomain helicase DNA binding protein 4      |
| 107932 | Chd4   | -0.47 | 0.56  | 0.65  | -0.26 | -0.51 | 0.3245 | 0.3866 | 0.3076 | 0.1964 | 0.0378 chromodomain helicase DNA binding protein 4      |
| 269610 | Chd5   | 0.05  | 0.08  | 0.19  | 0.06  | 0.04  | 0.5723 | 0.5816 | 0.3061 | 0.3351 | 0.3389 chromodomain helicase DNA binding protein 5      |
| 269610 | Chd5   | -0.04 | 0.31  | 0.08  | -0.17 | -0.09 | 0.6358 | 0.2567 | 0.6384 | 0.1838 | 0.2353 chromodomain helicase DNA binding protein 5      |
| 269610 | Chd5   | 0.06  | 0.05  | 0.16  | -0.13 | -0.16 | 0.6459 | 0.5912 | 0.5515 | 0.1793 | 0.1386 chromodomain helicase DNA binding protein 5      |
| 71389  | Chd6   | -0.32 | 0.35  | 0.16  | -0.57 | -0.36 | 0.3217 | 0.3697 | 0.6095 | 0.0055 | 0.0101 chromodomain helicase DNA binding protein 6      |
| 71389  | Chd6   | 0.22  | -0.17 | 0.28  | 0.43  | 0.38  | 0.4297 | 0.4380 | 0.1429 | 0.0548 | 0.0125 chromodomain helicase DNA binding protein 6      |
| 71389  | Chd6   | -0.19 | -0.45 | -0.68 | -0.80 | -0.90 | 0.4564 | 0.0601 | 0.0062 | 0.0005 | 0.0001 chromodomain helicase DNA binding protein 6      |
| 71389  | Chd6   | 0.13  | -0.25 | -0.22 | -0.15 | -0.25 | 0.5282 | 0.0781 | 0.0892 | 0.2582 | 0.0813 chromodomain helicase DNA binding protein 6      |
| 71389  | Chd6   | -0.21 | -0.23 | 0.08  | -     |       |        |        |        |        |                                                         |

|        |        |       |       |       |       |       |        |        |        |                 |                                                            |
|--------|--------|-------|-------|-------|-------|-------|--------|--------|--------|-----------------|------------------------------------------------------------|
| 12653  | Chgb   | 0.06  | 0.68  | 0.29  | 0.30  | 0.51  | 0.5979 | 0.0162 | 0.2677 | 0.0320          | 0.0001 chromogranin B                                      |
| 12653  | Chgb   | -0.04 | 0.60  | 0.30  | 0.36  | 0.55  | 0.6290 | 0.0043 | 0.0708 | 0.0428          | 0.0010 chromogranin B                                      |
| 12653  | Chgb   | 0.01  | -0.02 | 0.02  | 0.01  | 0.03  | 0.6754 | 0.6434 | 0.5149 | 0.5383          | 0.3715 chromogranin B                                      |
| 12653  | Chgb   | 0.00  | 0.69  | 0.36  | 0.31  | 0.51  | 0.7021 | 0.0092 | 0.1565 | 0.0102          | 0.0004 chromogranin B                                      |
| 110750 | Cse1l  | 0.42  | -0.55 | -0.19 | 0.38  | 0.33  | 0.3444 | 0.1091 | 0.3247 | 0.2079          | 0.1663 chromosome segregation 1-like (S. cerevisiae)       |
| 110750 | Cse1l  | 0.33  | -0.14 | 0.04  | 0.24  | 0.41  | 0.3469 | 0.3180 | 0.5845 | 0.1688          | 0.0151 chromosome segregation 1-like (S. cerevisiae)       |
| 211151 | Churc1 | 0.67  | -0.61 | -0.90 | -0.10 | -0.53 | 0.2232 | 0.0750 | 0.0131 | 0.4282          | 0.0242 churchill domain containing 1                       |
| 172228 | Cma1   | 0.72  | -0.11 | -0.08 | 0.00  | -0.38 | 0.0854 | 0.4649 | 0.5610 | 0.4649          | 0.0467 chymase 1, mast cell                                |
| 172228 | Cma1   | 0.44  | -0.04 | 0.13  | -0.07 | 0.00  | 0.1328 | 0.4779 | 0.5346 | 0.4235          | 0.4888 chymase 1, mast cell                                |
| 76701  | Circ   | -0.11 | 0.35  | 0.12  | -0.04 | 0.08  | 0.4886 | 0.3501 | 0.3618 | 0.4776          | 0.3103 chymotrypsin C (caldecrin)                          |
| 109660 | Crl    | 0.19  | -0.15 | 0.05  | -0.10 | -0.25 | 0.5808 | 0.2912 | 0.4377 | 0.3479          | 0.0096 chymotrypsin-like                                   |
| 66473  | Crtf1  | 0.31  | 0.03  | 0.10  | 0.25  | -0.04 | 0.5501 | 0.4323 | 0.4601 | 0.2145          | 0.4407 chymotrypsinogen B1                                 |
| 12804  | Croc   | 0.33  | -0.11 | -0.29 | 0.04  | -0.06 | 0.3154 | 0.3232 | 0.0831 | 0.4923          | 0.3709 ciliary neurotrophic factor receptor                |
| 230872 | Croc   | -0.99 | -0.22 | -0.76 | -0.81 | -1.26 | 0.0690 | 0.2425 | 0.0080 | 0.0040          | 0.0001 ciliary rootlet coiled-coil, rootletin              |
| 70737  | Cgn    | 0.61  | 1.28  | 1.10  | -0.10 | -0.07 | 0.0928 | 0.0074 | 0.0048 | 0.3780          | 0.3815 cingulin                                            |
| 70737  | Cgn    | 0.71  | 0.07  | 0.58  | 0.74  | 1.27  | 0.1868 | 0.6356 | 0.2337 | 0.0003          | 0.0000 cingulin                                            |
| 70737  | Cgn    | 0.22  | -0.02 | 0.14  | 0.04  | 0.24  | 0.5298 | 0.4454 | 0.6203 | 0.5223          | 0.2161 cingulin                                            |
| 70737  | Cgn    | 0.12  | -0.12 | 0.02  | -0.23 | -0.19 | 0.4182 | 0.4489 | 0.5923 | 0.0082          | 0.0330 cingulin-like 1                                     |
| 68178  | Cgn1   | -0.08 | 0.29  | 0.15  | -0.08 | 0.02  | 0.6441 | 0.5773 | 0.6022 | 0.4162          | 0.4682 cingulin-like 1                                     |
| 68178  | Cgn1   | 0.14  | 0.08  | -0.02 | 0.14  | -0.02 | 0.1983 | 0.1954 | 0.1954 | 0.3735          | 0.4515 cingulin-like 1                                     |
| 68178  | Cgn1   | 0.00  | 0.40  | 0.45  | 0.23  | 0.48  | 0.6947 | 0.3619 | 0.2962 | 0.1805          | 0.0106 cingulin-like 1                                     |
| 68178  | Cgn1   | 0.00  | 0.33  | 0.46  | 0.34  | 0.56  | 0.7016 | 0.4776 | 0.2962 | 0.1805          | 0.0106 cingulin-like 1                                     |
| 12753  | Clock  | 0.52  | -0.13 | 0.10  | 0.38  | 0.73  | 0.7028 | 0.3679 | 0.3239 | 0.0444          | 0.0047 cingulin-like 1                                     |
| 12753  | Clock  | 0.16  | 0.65  | 0.98  | 0.47  | 1.06  | 0.1105 | 0.3827 | 0.5994 | 0.0249          | 0.0005 circadian locomotor output cycles kaput             |
| 12753  | Clock  | 0.08  | 0.29  | 0.48  | 0.63  | 1.02  | 0.4526 | 0.0360 | 0.0039 | 0.0033          | 0.0000 circadian locomotor output cycles kaput             |
| 12753  | Clock  | -0.10 | 0.09  | 0.19  | 0.30  | 0.36  | 0.5296 | 0.1362 | 0.0063 | 0.0017          | 0.0000 circadian locomotor output cycles kaput             |
| 21771  | Chf1a  | -0.09 | 0.27  | 0.30  | 0.05  | 0.22  | 0.6493 | 0.3553 | 0.2558 | 0.0912          | 0.0294 circadian locomotor output cycles kaput             |
| 21771  | Chf1a  | -0.03 | 0.31  | 0.19  | -0.08 | 0.18  | 0.5692 | 0.4432 | 0.3453 | 0.4126          | 0.0849 cirrhosis, autosomal recessive 1A (human)           |
| 21771  | Chf1a  | -0.01 | -0.15 | 0.36  | 0.17  | 0.35  | 0.6681 | 0.2876 | 0.4492 | 0.3355          | 0.0553 cirrhosis, autosomal recessive 1A (human)           |
| 69634  | Cypl   | -0.22 | -0.13 | -0.19 | 0.36  | 0.17  | 0.6964 | 0.3926 | 0.0887 | 0.2603          | 0.0094 cirrhosis, autosomal recessive 1A (human)           |
| 69634  | Cypl   | -0.26 | -0.26 | -0.23 | -0.02 | -0.16 | 0.3581 | 0.4849 | 0.4308 | 0.1406          | 0.0005 citrate lyase beta like                             |
| 12874  | Cs     | 0.13  | -0.23 | -0.20 | -0.31 | -0.61 | 0.1118 | 0.1118 | 0.0589 | 0.5348          | 0.0819 citrate lyase beta like                             |
| 12874  | Cs     | 0.12  | -0.36 | -0.03 | -0.22 | 0.27  | 0.3740 | 0.3973 | 0.3495 | 0.1481          | 0.0041 citrate synthase                                    |
| 71832  | Csl    | -0.02 | -0.02 | 0.03  | -0.02 | -0.19 | 0.5604 | 0.2462 | 0.5906 | 0.2587          | 0.1219 citrate synthase                                    |
| 12704  | Cit    | -0.24 | -0.48 | -0.17 | -0.24 | -0.51 | 0.6761 | 0.4540 | 0.5159 | 0.5328          | 0.1236 citrate synthase like                               |
| 12704  | Cit    | -0.28 | -0.26 | -0.24 | -0.22 | -0.32 | 0.2686 | 0.3051 | 0.2276 | 0.0349          | 0.0145 citron                                              |
| 12704  | Cit    | -0.16 | -0.24 | 0.06  | -0.05 | -0.30 | 0.2871 | 0.2719 | 0.3306 | 0.1070          | 0.0275 citron                                              |
| 353509 | Cmm1   | -0.07 | 0.29  | 0.22  | 0.11  | 0.20  | 0.5991 | 0.2280 | 0.4649 | 0.4888          | 0.4017 citron                                              |
| 73381  | Cmm2a  | 0.01  | -0.10 | 0.15  | -0.14 | -0.15 | 0.6108 | 0.3039 | 0.3889 | 0.2169          | 0.4617 CLKF-like MARVEL transmembrane domain containing 1  |
| 75502  | Cmm2b  | 0.31  | -0.08 | -0.12 | -0.06 | -0.12 | 0.6948 | 0.2771 | 0.2309 | 0.3835          | 0.2486 CLKF-like MARVEL transmembrane domain containing 2A |
| 68119  | Cmm3   | -0.29 | 0.04  | -0.29 | -0.16 | -0.76 | 0.4467 | 0.3445 | 0.5232 | 0.3839          | 0.3486 CLKF-like MARVEL transmembrane domain containing 2B |
| 97487  | Cmm4   | -0.21 | -0.13 | -0.08 | -0.02 | -0.07 | 0.4835 | 0.3802 | 0.6271 | 0.2591          | 0.0013 CLKF-like MARVEL transmembrane domain containing 3  |
| 97487  | Cmm4   | 0.01  | 0.01  | 0.04  | -0.01 | -0.05 | 0.4824 | 0.2281 | 0.2813 | 0.5318          | 0.0013 CLKF-like MARVEL transmembrane domain containing 3  |
| 67213  | Cmm5   | 0.16  | -0.13 | -0.12 | 0.12  | 0.06  | 0.6859 | 0.5908 | 0.6379 | 0.5519          | 0.3540 CLKF-like MARVEL transmembrane domain containing 4  |
| 67213  | Cmm5   | 0.61  | -0.39 | -0.27 | 0.06  | 0.20  | 0.2141 | 0.1441 | 0.2005 | 0.4736          | 0.3266 CLKF-like MARVEL transmembrane domain containing 4  |
| 102545 | Cmm6   | -0.44 | -0.44 | -0.78 | -0.49 | -0.88 | 0.4324 | 0.3449 | 0.3262 | 0.3160          | 0.3266 CLKF-like MARVEL transmembrane domain containing 5  |
| 102545 | Cmm6   | 0.04  | 0.17  | 0.16  | 0.23  | 0.04  | 0.1328 | 0.1315 | 0.0045 | 0.0112          | 0.1302 CLKF-like MARVEL transmembrane domain containing 5  |
| 70031  | Cmm7   | 0.12  | -0.36 | -0.70 | -0.34 | -0.69 | 0.6585 | 0.4797 | 0.4867 | 0.1442          | 0.0000 CLKF-like MARVEL transmembrane domain containing 7  |
| 224291 | Ck2    | 0.01  | -0.05 | -0.06 | -0.03 | -0.05 | 0.4668 | 0.0935 | 0.0056 | 0.0120          | 0.4243 CLKF-like MARVEL transmembrane domain containing 7  |
| 229320 | Cim1   | 0.07  | 0.02  | -0.05 | 0.01  | 0.04  | 0.6787 | 0.4469 | 0.4133 | 0.4642          | 0.0001 CLKF-like MARVEL transmembrane domain containing 8  |
| 229320 | Cim1   | 0.09  | -0.10 | -0.06 | 0.08  | -0.02 | 0.5696 | 0.4969 | 0.5445 | 0.3408 clarin 1 |                                                            |
| 12070  | Cim3   | -0.01 | 0.00  | -0.01 | -0.04 | -0.10 | 0.4499 | 0.4171 | 0.5680 | 0.2788          | 0.4107 clarin 1                                            |
| 269582 | Cispn  | 0.00  | 0.02  | 0.09  | 0.06  | -0.04 | 0.6899 | 0.6417 | 0.5824 | 0.4563          | 0.3542 claspin homolog (Xenopus laevis)                    |
| 12265  | Clla   | -0.30 | -0.01 | -0.62 | -0.75 | -1.06 | 0.7025 | 0.6326 | 0.3961 | 0.3422          | 0.0028 class II transactivator                             |
| 216705 | Clin1  | 0.41  | -0.07 | 0.36  | 0.40  | 0.69  | 0.2461 | 0.3821 | 0.4176 | 0.0662          | 0.0008 clathrin interactor 1                               |
| 67300  | Clic   | -0.24 | 0.11  | 0.40  | 0.49  | 0.69  | 0.6047 | 0.3655 | 0.1921 | 0.0168          | 0.0018 clathrin interactor 1                               |
| 67300  | Clic   | -0.55 | -0.27 | 0.17  | 0.03  | 0.24  | 0.2132 | 0.2063 | 0.6239 | 0.5167          | 0.0113 clathrin, heavy polypeptide (Hc)                    |
| 67300  | Clic   | 0.02  | 0.00  | 0.01  | -0.01 | 0.02  | 0.4602 | 0.4600 | 0.1691 | 0.2122          | 0.2619 clathrin, heavy polypeptide (Hc)                    |
| 67300  | Clic   | -0.01 | 0.21  | 0.25  | 0.31  | 0.46  | 0.6650 | 0.6173 | 0.6280 | 0.5530          | 0.4514 clathrin, heavy polypeptide (Hc)                    |
| 12757  | Cla    | 0.21  | -0.18 | -0.48 | -0.22 | -0.17 | 0.6895 | 0.2554 | 0.1834 | 0.0756          | 0.0089 clathrin, heavy polypeptide (Hc)                    |
| 74325  | Cla    | 0.22  | 0.37  | 0.62  | 0.61  | 0.93  | 0.2132 | 0.2459 | 0.0089 | 0.0308          | 0.0593 clathrin, light polypeptide (Lcb)                   |
| 12737  | Cla1   | 0.37  | -0.54 | -0.45 | -0.13 | -0.13 | 0.1738 | 0.0121 | 0.0083 | 0.2084          | 0.0001 clathrin, light polypeptide (Lcb)                   |
| 12737  | Cla1   | 0.11  | 0.22  | 0.49  | 0.36  | 0.60  | 0.4046 | 0.2717 | 0.0476 | 0.0070          | 0.1586 claudin 1                                           |
| 58187  | Cla10  | 0.40  | -0.64 | -0.77 | -0.32 | -0.67 | 0.2818 | 0.0230 | 0.0057 | 0.0399          | 0.0001 claudin 1                                           |
| 64945  | Cla11  | 0.04  | -0.01 | -0.08 | 0.00  | 0.02  | 0.6060 | 0.6438 | 0.6241 | 0.1715          | 0.0014 claudin 10                                          |
| 57255  | Cla12  | -0.03 | -0.41 | -0.08 | -0.22 | -0.12 | 0.5646 | 0.1134 |        |                 |                                                            |



|        |         |         |       |       |       |       |        |        |        |        |                                                       |
|--------|---------|---------|-------|-------|-------|-------|--------|--------|--------|--------|-------------------------------------------------------|
| 56358  | Copz2   | 0.06    | -0.19 | -0.20 | -0.07 | -0.21 | 0.5872 | 0.2720 | 0.2963 | 0.4755 | 0.0703 coatomer protein complex, subunit zeta 2       |
| 319876 | Cobl1   | 0.66    | -0.24 | 0.24  | 0.45  | 0.76  | 0.1993 | 0.3263 | 0.4853 | 0.0977 | 0.0067 Cobl-like 1                                    |
| 319876 | Cobl1   | 0.16    | 0.01  | 0.17  | -0.03 | 0.00  | 0.3268 | 0.2502 | 0.4253 | 0.1279 | 0.4939 Cobl-like 1                                    |
| 319876 | Cobl1   | -0.46   | 0.09  | 0.52  | 0.28  | 0.39  | 0.5014 | 0.3644 | 0.1758 | 0.1279 | 0.0308 Cobl-like 1                                    |
| 226043 | Cbwd1   | -0.06   | -0.08 | -0.01 | -0.02 | 0.15  | 0.4763 | 0.4628 | 0.6313 | 0.5041 | 0.0336 CEBW domain containing 1                       |
| 226043 | Cbwd1   | 0.04    | -0.02 | 0.11  | 0.06  | 0.31  | 0.6701 | 0.4147 | 0.5582 | 0.3999 | 0.0482 CEBW domain containing 1                       |
| 71743  | Casy    | -0.68   | -0.07 | -0.51 | -0.55 | -0.91 | 0.3358 | 0.4749 | 0.5800 | 0.0233 | 0.0001 Coenzyme A synthase                            |
| 67876  | Csq10b  | 0.65    | -0.12 | 0.18  | 0.77  | 0.87  | 0.1270 | 0.3523 | 0.6153 | 0.0021 | 0.0006 coenzyme Q10 homolog B (S. cerevisiae)         |
| 67876  | Csq10b  | 0.43    | -0.15 | 0.16  | 0.41  | 0.43  | 0.2062 | 0.2721 | 0.6254 | 0.0019 | 0.0067 coenzyme Q10 homolog B (S. cerevisiae)         |
| 67876  | Csq10b  | -0.76   | -0.14 | -0.76 | -0.86 | -1.21 | 0.4467 | 0.4690 | 0.6031 | 0.0068 | 0.4541 coenzyme Q10 homolog B (S. cerevisiae)         |
| 71883  | Csq10b  | -0.03   | 0.02  | 0.11  | 0.00  | 0.01  | 0.6049 | 0.5715 | 0.3652 | 0.5597 | 0.0462 coenzyme Q2 homolog, prenyltransferase (yeast) |
| 71883  | Csq10b  | 0.14    | -0.33 | -0.39 | -0.06 | -0.17 | 0.5639 | 0.1030 | 0.0831 | 0.5038 | 0.2204 coenzyme Q3 homolog, methyltransferase (yeast) |
| 230027 | Csq3    | 0.01    | -0.06 | -0.08 | -0.04 | -0.08 | 0.6873 | 0.5912 | 0.5232 | 0.4198 | 0.4288 coenzyme Q4 homolog (yeast)                    |
| 227683 | Csq4    | -0.03   | -0.14 | -0.26 | -0.10 | -0.03 | 0.6664 | 0.2931 | 0.0631 | 0.3493 | 0.0000 coenzyme Q4 homolog (yeast)                    |
| 227683 | Csq4    | -0.02   | -0.33 | -0.74 | -0.73 | -1.12 | 0.6804 | 0.1112 | 0.0063 | 0.0001 | 0.0000 coenzyme Q4 homolog (yeast)                    |
| 52064  | Csq5    | 0.88    | -0.50 | -0.31 | -0.10 | 0.09  | 0.1095 | 0.1213 | 0.2130 | 0.3600 | 0.2953 coenzyme Q5 homolog, methyltransferase (yeast) |
| 52064  | Csq5    | -0.13   | 0.04  | 0.16  | 0.04  | -0.17 | 0.6473 | 0.3862 | 0.2897 | 0.4920 | 0.1321 coenzyme Q5 homolog, methyltransferase (yeast) |
| 217707 | Csq6    | 0.65    | -0.06 | 0.16  | 0.09  | 0.29  | 0.5864 | 0.3873 | 0.5903 | 0.4793 | 0.1429 coenzyme Q8 homolog (yeast)                    |
| 67914  | Csq9    | -0.29   | -0.40 | -0.30 | -0.14 | -0.40 | 0.5572 | 0.6547 | 0.5950 | 0.4222 | 0.3411 coenzyme Q9 homolog (yeast)                    |
| 58202  | Cobra1  | -0.84   | -0.20 | -0.35 | -0.37 | -0.40 | 0.4417 | 0.4709 | 0.5062 | 0.0469 | 0.0430 cofactor of BRCA1                              |
| 12631  | Cfl1    | -0.67   | -0.07 | 0.52  | -0.03 | -0.33 | 0.2455 | 0.5293 | 0.1279 | 0.5291 | 0.0332 cofilin 1, non-muscle                          |
| 12631  | Cfl1    | 0.09    | -0.09 | 0.48  | 0.31  | 0.31  | 0.6109 | 0.3976 | 0.2002 | 0.2731 | 0.2148 cofilin 1, non-muscle                          |
| 12632  | Cfl2    | 0.39    | -0.05 | -0.21 | 0.85  | 0.74  | 0.1871 | 0.5365 | 0.3471 | 0.0008 | 0.0004 cofilin 2, muscle                              |
| 66264  | Cdc28b  | 0.14    | -0.33 | -0.50 | -0.39 | -0.29 | 0.5088 | 0.0431 | 0.0033 | 0.0444 | 0.0722 coiled coil domain containing 28B              |
| 66264  | Cdc28b  | -0.6264 | -0.19 | -1.08 | -0.68 | -0.88 | 0.5416 | 0.2777 | 0.0056 | 0.0044 | 0.0002 coiled coil domain containing 28B              |
| 106986 | Cdc88a  | 0.31    | -0.56 | -0.61 | -0.23 | -0.16 | 0.2945 | 0.0259 | 0.0109 | 0.0222 | 0.0981 coiled coil domain containing 88A              |
| 106986 | Cdc88a  | 0.15    | -0.17 | -0.03 | 0.03  | 0.13  | 0.4314 | 0.3505 | 0.5891 | 0.5001 | 0.1746 coiled coil domain containing 88A              |
| 106986 | Cdc88a  | 0.05    | 0.05  | 0.01  | 0.02  | 0.13  | 0.5660 | 0.6417 | 0.5497 | 0.4874 | 0.3993 coiled coil domain containing 88A              |
| 106986 | Cdc88a  | -0.11   | 0.16  | 0.09  | -0.53 | -0.45 | 0.6063 | 0.6309 | 0.5467 | 0.0089 | 0.0124 coiled coil domain containing 88A              |
| 106986 | Cdc88a  | 0.02    | 0.23  | 0.38  | 0.44  | 0.63  | 0.6587 | 0.0593 | 0.0218 | 0.0011 | 0.0002 coiled coil domain containing 88A              |
| 106986 | Cdc88a  | 0.01    | -0.02 | -0.04 | -0.12 | -0.06 | 0.6764 | 0.5499 | 0.4389 | 0.0995 | 0.2803 coiled coil domain containing 88A              |
| 240084 | Cchr1   | -0.70   | 0.31  | 0.03  | 0.30  | -0.20 | 0.3159 | 0.2325 | 0.4045 | 0.3109 | 0.1578 coiled alpha-helical rod protein 1             |
| 212139 | C22d1a  | -0.51   | 0.61  | 0.49  | 0.30  | 0.15  | 0.1053 | 0.0117 | 0.0273 | 0.0188 | 0.1723 coiled-coil and C2 domain containing 1A        |
| 319865 | C22d1b  | -0.27   | 0.53  | -0.11 | -0.46 | -0.60 | 0.4922 | 0.1203 | 0.4441 | 0.1594 | 0.0564 coiled-coil and C2 domain containing 1B        |
| 319865 | C22d1b  | 0.01    | 0.19  | 0.15  | 0.14  | 0.14  | 0.6807 | 0.5869 | 0.2294 | 0.0842 | 0.0743 coiled-coil and C2 domain containing 1B        |
| 231214 | C22d2a  | 0.31    | -0.26 | -0.38 | -0.22 | -0.18 | 0.3389 | 0.1438 | 0.0461 | 0.0740 | 0.1156 coiled-coil and C2 domain containing 2A        |
| 225523 | Cdc100  | 0.53    | -0.50 | -0.38 | -0.10 | 0.13  | 0.1287 | 0.0385 | 0.0737 | 0.3361 | 0.1136 coiled-coil domain containing 100              |
| 225523 | Cdc100  | 0.07    | 0.00  | -0.03 | 0.03  | 0.03  | 0.4949 | 0.6280 | 0.5493 | 0.4501 | 0.4838 coiled-coil domain containing 100              |
| 225523 | Cdc100  | -0.10   | 0.08  | 0.03  | -0.09 | 0.01  | 0.5642 | 0.5031 | 0.4441 | 0.3709 | 0.3403 coiled-coil domain containing 100              |
| 225523 | Cdc100  | 0.09    | 0.03  | 0.00  | 0.00  | 0.05  | 0.6665 | 0.0978 | 0.1490 | 0.5558 | 0.1532 coiled-coil domain containing 100              |
| 225523 | Cdc100  | -0.06   | 0.22  | 0.12  | 0.00  | 0.10  | 0.5552 | 0.3828 | 0.6428 | 0.5062 | 0.4826 coiled-coil domain containing 101              |
| 75565  | Cdc101  | -0.17   | 0.48  | 0.18  | 0.04  | 0.14  | 0.4478 | 0.3932 | 0.4741 | 0.2436 | 0.0563 coiled-coil domain containing 102A             |
| 234582 | Cdc102a | -0.23   | 0.37  | 0.02  | -0.12 | -0.29 | 0.3129 | 0.6075 | 0.1403 | 0.0019 | 0.0024 coiled-coil domain containing 103              |
| 73293  | Cdc103  | -0.18   | -0.02 | -0.21 | -0.34 | -0.34 | 0.5046 | 0.1178 | 0.0012 | 0.0006 | 0.0000 coiled-coil domain containing 103              |
| 73293  | Cdc103  | -0.43   | -0.18 | -0.43 | -1.18 | -1.52 | 0.5600 | 0.5322 | 0.5120 | 0.0277 | 0.3667 coiled-coil domain containing 104              |
| 216618 | Cdc104  | 0.12    | 0.01  | -0.02 | -0.27 | 0.10  | 0.4987 | 0.6486 | 0.5730 | 0.2870 | 0.2751 coiled-coil domain containing 105              |
| 70976  | Cdc105  | 0.06    | 0.00  | -0.02 | 0.06  | 0.06  | 0.4802 | 0.5584 | 0.6371 | 0.0213 | 0.0001 coiled-coil domain containing 106              |
| 232821 | Cdc106  | 0.18    | 0.17  | 0.10  | 0.24  | 0.50  | 0.4202 | 0.5684 | 0.4300 | 0.5134 | 0.3150 coiled-coil domain containing 108              |
| 241116 | Cdc108  | -0.11   | 0.03  | 0.11  | 0.02  | -0.05 | 0.4314 | 0.6456 | 0.4130 | 0.4542 | 0.4080 coiled-coil domain containing 108              |
| 241116 | Cdc108  | 0.06    | -0.02 | -0.11 | -0.03 | 0.02  | 0.4994 | 0.6407 | 0.3000 | 0.2057 | 0.0053 coiled-coil domain containing 108              |
| 215999 | Cdc109a | -0.20   | 0.08  | -0.56 | -0.33 | -0.94 | 0.5407 | 0.4289 | 0.1516 | 0.1652 | 0.0604 coiled-coil domain containing 109A             |
| 215999 | Cdc109a | 0.50    | 0.00  | -0.29 | 0.26  | 0.32  | 0.2144 | 0.4857 | 0.4704 | 0.5153 | 0.4874 coiled-coil domain containing 109A             |
| 66815  | Cdc109b | 0.13    | 0.04  | -0.07 | -0.02 | 0.00  | 0.4211 | 0.5943 | 0.5159 | 0.3187 | 0.1517 coiled-coil domain containing 109B             |
| 74453  | Cdc111  | -0.12   | -0.34 | -0.28 | -0.13 | -0.21 | 0.5855 | 0.4721 | 0.5232 | 0.5241 | 0.3908 coiled-coil domain containing 11               |
| 212392 | Cdc110  | 0.23    | 0.36  | -0.13 | 0.04  | 0.10  | 0.4725 | 0.1277 | 0.6202 | 0.2947 | 0.4144 coiled-coil domain containing 110              |
| 408022 | Cdc111  | 0.00    | -0.07 | -0.03 | -0.06 | -0.02 | 0.7042 | 0.5218 | 0.0983 | 0.2520 | 0.4038 coiled-coil domain containing 111              |
| 240261 | Cdc112  | 0.19    | -0.12 | -0.22 | -0.16 | -0.06 | 0.4721 | 0.2303 | 0.0983 | 0.2520 | 0.2905 coiled-coil domain containing 112              |
| 244608 | Cdc113  | 0.08    | 0.10  | -0.11 | -0.01 | 0.08  | 0.5375 | 0.5989 | 0.3228 | 0.5428 | 0.0000 coiled-coil domain containing 113              |
| 211535 | Cdc114  | 0.15    | -0.30 | -1.56 | -1.21 | -1.84 | 0.5605 | 0.2690 | 0.0009 | 0.0003 | 0.4613 coiled-coil domain containing 114              |
| 69668  | Cdc115  | 0.15    | -0.02 | -0.14 | 0.08  | -0.01 | 0.3171 | 0.4672 | 0.0986 | 0.1961 | 0.0000 coiled-coil domain containing 115              |
| 76872  | Cdc116  | 0.43    | 0.38  | 0.19  | 0.67  | 0.90  | 0.2324 | 0.3848 | 0.3316 | 0.2974 | 0.0107 coiled-coil domain containing 116              |
| 76872  | Cdc116  | 0.06    | 0.12  | 0.17  | 0.09  | 0.20  | 0.5501 | 0.4703 | 0.3316 | 0.0001 | 0.4882 coiled-coil domain containing 116              |
| 104779 | Cdc117  | 0.06    | 0.01  | -0.35 | -0.11 | 0.00  | 0.5768 | 0.6049 | 0.0100 | 0.2693 | 0.3110 coiled-coil domain containing 117              |
| 104779 | Cdc117  | 0.79    | -1.46 | -0.95 | -0.20 | 0.12  | 0.5981 | 0.0018 | 0.0070 | 0.2800 | 0.0202 coiled-coil domain containing 117              |
| 72854  | Cdc112  | 0.07    | -0.36 | -0.37 | -0.46 | -0.34 | 0.4343 | 0.2732 | 0.0170 | 0.0102 | 0.2910 coiled-coil domain containing 12               |
| 72854  | Cdc112  | -0.97   | 0.42  | 0.18  | 0.07  | -0.11 | 0.4354 | 0.5633 | 0.3231 | 0.4588 | 0.2673 coiled-coil domain containing 12               |
| 72854  | Cdc112  | 0.22    | 0.15  | -0.19 | 0.12  | 0.19  | 0.3539 | 0.2464 | 0.0049 | 0.0004 | 0.0000 coiled-coil domain containing 120              |
| 54648  | Cdc120  | 0.39    | 0.59  | 1.69  | 1.26  | 1.89  | 0.1334 | 0.0324 | 0.0007 | 0.4435 | 0.0418 coiled-coil domain containing 121              |
| 403180 | Cdc121  | 0.28    | -0.38 | -0.47 |       |       |        |        |        |        |                                                       |

|        |          |       |       |       |       |       |        |        |        |                                          |                                           |
|--------|----------|-------|-------|-------|-------|-------|--------|--------|--------|------------------------------------------|-------------------------------------------|
| 232664 | Ccdc136  | -0.28 | 0.44  | 0.46  | 0.27  | 0.37  | 0.1240 | 0.0366 | 0.0127 | 0.0701                                   | 0.0034 coiled-coil domain containing 136  |
| 67291  | Ccdc137  | 0.19  | -0.49 | -0.53 | -0.32 | -0.29 | 0.4361 | 0.0464 | 0.0184 | 0.0820                                   | 0.0351 coiled-coil domain containing 137  |
| 76138  | Ccdc138  | 0.12  | 0.01  | -0.02 | 0.09  | -0.02 | 0.4535 | 0.5670 | 0.4691 | 0.5032                                   | 0.4411 coiled-coil domain containing 138  |
| 76138  | Ccdc138  | 0.06  | -0.17 | -0.07 | -0.09 | -0.14 | 0.5138 | 0.0680 | 0.3408 | 0.2079                                   | 0.0654 coiled-coil domain containing 138  |
| 76138  | Ccdc138  | -0.03 | -0.36 | -0.59 | -0.21 | -0.34 | 0.6764 | 0.5001 | 0.2042 | 0.1196                                   | 0.0034 coiled-coil domain containing 138  |
| 239839 | Ccdc14   | 0.09  | -0.16 | -0.21 | -0.08 | -0.11 | 0.5116 | 0.1798 | 0.0793 | 0.3600                                   | 0.1304 coiled-coil domain containing 14   |
| 239839 | Ccdc14   | -0.01 | 0.00  | -0.12 | 0.07  | 0.05  | 0.6826 | 0.4848 | 0.5536 | 0.3094                                   | 0.3140 coiled-coil domain containing 14   |
| 243510 | Ccdc142  | 0.03  | -0.07 | -0.07 | -0.02 | -0.12 | 0.6479 | 0.4961 | 0.4420 | 0.5214                                   | 0.1361 coiled-coil domain containing 142  |
| 241943 | Ccdc144b | 0.04  | -0.05 | 0.13  | 0.08  | 0.07  | 0.5796 | 0.3947 | 0.2256 | 0.1957                                   | 0.1882 coiled-coil domain containing 144B |
| 381229 | Ccdc147  | -0.18 | 0.11  | -0.13 | -0.27 | -0.23 | 0.3648 | 0.3182 | 0.4950 | 0.0158                                   | 0.0222 coiled-coil domain containing 147  |
| 381229 | Ccdc147  | 0.16  | -0.24 | -0.48 | 0.00  | 0.02  | 0.4878 | 0.5102 | 0.5515 | 0.4209 coiled-coil domain containing 147 |                                           |
| 227933 | Ccdc148  | 0.07  | 0.06  | 0.03  | -0.01 | 0.00  | 0.5814 | 0.6467 | 0.5689 | 0.5457                                   | 0.4929 coiled-coil domain containing 148  |
| 227933 | Ccdc148  | 0.05  | 0.05  | -0.09 | 0.04  | 0.04  | 0.6040 | 0.6266 | 0.2027 | 0.4467                                   | 0.3613 coiled-coil domain containing 148  |
| 245902 | Ccdc15   | -0.39 | 0.49  | -0.19 | -1.07 | -1.24 | 0.4466 | 0.3872 | 0.3241 | 0.0171                                   | 0.0016 coiled-coil domain containing 15   |
| 245902 | Ccdc15   | 0.63  | -0.10 | -0.05 | 0.62  | 0.59  | 0.5016 | 0.4586 | 0.6082 | 0.3280                                   | 0.2691 coiled-coil domain containing 15   |
| 66983  | Ccdc16   | 0.16  | -0.75 | -0.84 | -0.46 | -0.32 | 0.4489 | 0.0230 | 0.0107 | 0.0024                                   | 0.0369 coiled-coil domain containing 16   |
| 66983  | Ccdc16   | 0.03  | 0.41  | 0.33  | -0.09 | -0.07 | 0.6765 | 0.2945 | 0.2908 | 0.4046                                   | 0.3924 coiled-coil domain containing 16   |
| 622663 | Ccdc16   | 1.41  | -0.71 | -1.26 | -0.45 | -0.86 | 0.0009 | 0.0070 | 0.0001 | 0.0775                                   | 0.0006 coiled-coil domain containing 17   |
| 73254  | Ccdc18   | 0.01  | 0.01  | 0.06  | 0.07  | 0.01  | 0.6840 | 0.6530 | 0.5248 | 0.3432                                   | 0.4569 coiled-coil domain containing 18   |
| 71870  | Ccdc19   | -0.36 | -0.21 | -1.35 | -1.04 | -1.60 | 0.5011 | 0.5640 | 0.0897 | 0.0001                                   | 0.0000 coiled-coil domain containing 19   |
| 70012  | Cdc21    | 0.33  | 0.24  | 0.28  | 0.13  | 0.12  | 0.2261 | 0.4055 | 0.6409 | 0.0040                                   | 0.0001 coiled-coil domain containing 21   |
| 54638  | Cdc22    | 0.74  | -0.11 | -0.58 | -0.61 | -1.07 | 0.4175 | 0.4657 | 0.0353 | 0.1895                                   | 0.1676 coiled-coil domain containing 22   |
| 69216  | Cdc23    | 0.56  | -0.25 | -0.46 | -0.05 | 0.12  | 0.1202 | 0.1507 | 0.0279 | 0.0034                                   | 0.0001 coiled-coil domain containing 23   |
| 67179  | Cdc25    | 0.45  | -0.10 | 0.33  | 0.47  | 0.74  | 0.0845 | 0.3427 | 0.2179 | 0.0034                                   | 0.2648 coiled-coil domain containing 25   |
| 67179  | Cdc25    | -0.27 | 0.65  | 0.47  | -0.67 | -0.38 | 0.5434 | 0.4170 | 0.4795 | 0.0611                                   | 0.1294 coiled-coil domain containing 25   |
| 381580 | Cdc27    | -0.06 | 0.07  | 0.05  | -0.04 | 0.25  | 0.0845 | 0.3073 | 0.3254 | 0.3795                                   | 0.3269 coiled-coil domain containing 27   |
| 215814 | Cdc28a   | -0.48 | 0.11  | -0.42 | -0.79 | -0.93 | 0.5040 | 0.5184 | 0.5691 | 0.3693                                   | 0.0003 coiled-coil domain containing 28A  |
| 215814 | Cdc28a   | 0.21  | -0.58 | -1.49 | -1.22 | -1.90 | 0.2333 | 0.0793 | 0.0023 | 0.0001                                   | 0.0000 coiled-coil domain containing 28A  |
| 215814 | Cdc28a   | 0.04  | -0.06 | -0.05 | 0.06  | 0.03  | 0.6219 | 0.3073 | 0.3254 | 0.3795                                   | 0.3938 coiled-coil domain containing 28A  |
| 74186  | Cdc3     | 0.12  | -0.05 | 0.10  | 0.13  | 0.25  | 0.3488 | 0.5702 | 0.4349 | 0.2257                                   | 0.0150 coiled-coil domain containing 3    |
| 269336 | Cdc32    | 0.40  | -0.08 | -0.26 | 0.01  | 0.32  | 0.2180 | 0.3392 | 0.0848 | 0.5582                                   | 0.0366 coiled-coil domain containing 32   |
| 269336 | Cdc32    | 0.03  | 0.28  | 0.17  | 0.19  | 0.25  | 0.6673 | 0.2793 | 0.4896 | 0.0971                                   | 0.0164 coiled-coil domain containing 32   |
| 382077 | Cdc33    | 0.18  | 0.07  | 0.07  | 0.16  | 0.02  | 0.5168 | 0.5192 | 0.5123 | 0.2172                                   | 0.4450 coiled-coil domain containing 33   |
| 382077 | Cdc33    | 0.03  | -0.47 | -1.11 | -0.67 | -0.97 | 0.6746 | 0.2361 | 0.0022 | 0.0022                                   | 0.0000 coiled-coil domain containing 33   |
| 68201  | Cdc34    | 0.59  | -0.33 | -0.46 | -0.21 | 0.15  | 0.1291 | 0.1163 | 0.0705 | 0.1236                                   | 0.1549 coiled-coil domain containing 34   |
| 68201  | Cdc34    | 0.03  | -0.01 | -0.97 | 0.01  | -0.03 | 0.6109 | 0.5830 | 0.3968 | 0.5344                                   | 0.3780 coiled-coil domain containing 34   |
| 434438 | Cdc36    | -0.05 | 0.04  | -0.01 | 0.03  | 0.06  | 0.5514 | 0.5565 | 0.6311 | 0.4540                                   | 0.2820 coiled-coil domain containing 36   |
| 243538 | Cdc37    | -0.07 | 0.23  | -0.16 | -0.19 | -0.24 | 0.6501 | 0.2627 | 0.6106 | 0.0914                                   | 0.0542 coiled-coil domain containing 37   |
| 243538 | Cdc37    | 0.02  | -0.07 | -0.99 | -0.79 | -1.14 | 0.6826 | 0.4213 | 0.0021 | 0.0020                                   | 0.0001 coiled-coil domain containing 37   |
| 237465 | Cdc38    | -0.04 | 0.14  | 0.08  | 0.03  | -0.05 | 0.6006 | 0.3435 | 0.5460 | 0.4501                                   | 0.3080 coiled-coil domain containing 38   |
| 51938  | Cdc39    | 0.24  | -0.07 | -0.73 | -0.60 | -0.74 | 0.3972 | 0.4888 | 0.0070 | 0.0003                                   | 0.4627 coiled-coil domain containing 39   |
| 51938  | Cdc39    | 0.09  | -0.04 | 0.00  | 0.00  | -0.01 | 0.4363 | 0.4097 | 0.5264 | 0.5558                                   | 0.2662 coiled-coil domain containing 40   |
| 270907 | Cdc40    | 0.69  | -0.57 | -0.89 | -0.23 | -0.17 | 0.1047 | 0.4865 | 0.0053 | 0.1449                                   | 0.1355 coiled-coil domain containing 41   |
| 77048  | Cdc41    | 0.24  | -0.02 | -0.36 | -0.21 | -0.25 | 0.2682 | 0.4887 | 0.0663 | 0.1323                                   | 0.1355 coiled-coil domain containing 41   |
| 77048  | Cdc41    | 0.17  | -0.10 | 0.11  | 0.27  | 0.55  | 0.4121 | 0.4949 | 0.5107 | 0.0473                                   | 0.0011 coiled-coil domain containing 41   |
| 77048  | Cdc41    | 0.06  | -0.08 | 0.11  | 0.12  | 0.09  | 0.5693 | 0.3715 | 0.4717 | 0.2978                                   | 0.1790 coiled-coil domain containing 41   |
| 276920 | Cdc42    | 0.02  | -0.01 | -0.13 | -0.08 | -0.16 | 0.6640 | 0.6263 | 0.1466 | 0.2704                                   | 0.0504 coiled-coil domain containing 42   |
| 52715  | Cdc43    | 0.27  | 0.36  | -0.07 | 0.02  | 0.06  | 0.1917 | 0.4715 | 0.3054 | 0.5250                                   | 0.3102 coiled-coil domain containing 43   |
| 52715  | Cdc43    | -0.18 | 0.14  | -0.15 | -0.19 | -0.24 | 0.5609 | 0.2929 | 0.5631 | 0.2204                                   | 0.0384 coiled-coil domain containing 43   |
| 70207  | Cdc44    | -0.07 | -0.27 | -0.65 | -0.41 | -0.65 | 0.6135 | 0.4323 | 0.0556 | 0.0021                                   | 0.0000 coiled-coil domain containing 44   |
| 320162 | Cdc45    | 0.27  | -0.22 | -0.44 | -0.17 | -0.11 | 0.2279 | 0.0475 | 0.0055 | 0.1639                                   | 0.2247 coiled-coil domain containing 45   |
| 320162 | Cdc45    | 0.38  | -0.37 | -0.55 | -0.16 | -0.25 | 0.2676 | 0.0657 | 0.0150 | 0.1116                                   | 0.0200 coiled-coil domain containing 45   |
| 320162 | Cdc45    | 0.16  | 0.05  | 0.23  | 0.26  | 0.31  | 0.4757 | 0.5796 | 0.4630 | 0.0598                                   | 0.0011 coiled-coil domain containing 45   |
| 320162 | Cdc45    | -0.05 | 0.09  | 0.02  | -0.12 | -0.05 | 0.5736 | 0.3345 | 0.5483 | 0.2443                                   | 0.3540 coiled-coil domain containing 45   |
| 76380  | Cdc46    | 0.33  | 0.06  | -0.13 | -0.26 | 0.01  | 0.3468 | 0.5619 | 0.5813 | 0.1086                                   | 0.0243 coiled-coil domain containing 46   |
| 76380  | Cdc46    | 0.16  | 0.04  | 0.21  | 0.24  | 0.27  | 0.4988 | 0.5363 | 0.5689 | 0.0214                                   | 0.0716 coiled-coil domain containing 46   |
| 67163  | Cdc47    | -0.36 | -0.10 | -0.39 | -0.41 | -0.74 | 0.5669 | 0.4596 | 0.5813 | 0.1086                                   | 0.0022 coiled-coil domain containing 47   |
| 67163  | Cdc47    | 0.10  | -0.12 | 0.04  | 0.05  | 0.18  | 0.5782 | 0.3568 | 0.6303 | 0.4920                                   | 0.1516 coiled-coil domain containing 47   |
| 67480  | Cdc49    | -0.25 | 0.05  | 0.13  | -0.05 | 0.18  | 0.5201 | 0.3732 | 0.2910 | 0.4485                                   | 0.1295 coiled-coil domain containing 49   |
| 67480  | Cdc49    | 0.02  | -0.01 | 0.64  | 0.62  | 1.00  | 0.6952 | 0.4464 | 0.0395 | 0.0004                                   | 0.0001 coiled-coil domain containing 49   |
| 225745 | Cdc5     | -0.28 | 0.53  | -0.06 | -0.28 | -0.25 | 0.4583 | 0.4137 | 0.3933 | 0.1668                                   | 0.1153 coiled-coil domain containing 5    |
| 67501  | Cdc50    | 0.40  | -0.45 | -0.31 | -0.06 | -0.16 | 0.1147 | 0.0300 | 0.0304 | 0.3960                                   | 0.1327 coiled-coil domain containing 5    |
| 67501  | Cdc50    | 0.37  | -0.22 | -0.08 | 0.22  | 0.52  | 0.2114 | 0.1934 | 0.4425 | 0.1806                                   | 0.0053 coiled-coil domain containing 50   |
| 67501  | Cdc50    | -0.12 | -0.15 | -0.02 | -0.17 | -0.17 | 0.5421 | 0.6328 | 0.5043 | 0.0351                                   | 0.0228 coiled-coil domain containing 50   |
| 66658  | Cdc51    | 0.14  | -0.53 | -0.79 | -0.63 | -0.83 | 0.1224 | 0.0270 | 0.0028 | 0.0105                                   | 0.0018 coiled-coil domain containing 51   |
| 212514 | Cdc52    | 0.52  | -0.80 | -1.20 | -0.46 | -0.82 | 0.5    |        |        |                                          |                                           |

|        |         |       |       |       |       |       |        |        |        |                                         |                                                                |
|--------|---------|-------|-------|-------|-------|-------|--------|--------|--------|-----------------------------------------|----------------------------------------------------------------|
| 320234 | Ccd666  | 0.04  | -0.16 | 0.01  | -0.01 | -0.02 | 0.6108 | 0.3523 | 0.5534 | 0.5203                                  | 0.4025 coiled-coil domain containing 66                        |
| 234964 | Ccd667  | -0.14 | -0.05 | -0.10 | -0.29 | -0.29 | 0.5241 | 0.4784 | 0.3787 | 0.0427                                  | 0.0433 coiled-coil domain containing 67                        |
| 381175 | Ccd668  | 0.47  | -0.27 | -0.46 | -0.03 | 0.22  | 0.1969 | 0.2187 | 0.0529 | 0.5100                                  | 0.0939 coiled-coil domain containing 68                        |
| 52570  | Ccd669  | -0.16 | 0.06  | 0.19  | -0.14 | 0.22  | 0.5010 | 0.4940 | 0.3845 | 0.3481                                  | 0.2619 coiled-coil domain containing 69                        |
| 74703  | Ccd67   | 0.08  | -0.35 | -0.52 | -0.17 | -0.14 | 0.6449 | 0.5661 | 0.3904 | 0.1087                                  | 0.1917 coiled-coil domain containing 7                         |
| 74703  | Ccd67   | 0.05  | 0.01  | 0.04  | 0.06  | -0.04 | 0.5551 | 0.6437 | 0.5732 | 0.3157                                  | 0.3593 coiled-coil domain containing 7                         |
| 67929  | Ccd670  | -0.01 | 0.00  | -0.13 | 0.09  | 0.00  | 0.6853 | 0.5899 | 0.4720 | 0.2509                                  | 0.4855 coiled-coil domain containing 7                         |
| 72454  | Ccd671  | 0.05  | -0.02 | -0.04 | 0.05  | -0.03 | 0.5306 | 0.6108 | 0.5263 | 0.3091                                  | 0.3718 coiled-coil domain containing 70                        |
| 72454  | Ccd671  | 0.14  | 0.50  | 0.48  | 0.53  | 0.60  | 0.5017 | 0.1443 | 0.2036 | 0.0003                                  | 0.0000 coiled-coil domain containing 71                        |
| 66167  | Ccd672  | -0.47 | -0.06 | -0.15 | 0.58  | 0.60  | 0.5541 | 0.4354 | 0.4449 | 0.0029                                  | 0.0027 coiled-coil domain containing 71                        |
| 66167  | Ccd672  | 0.18  | -0.32 | -0.59 | -0.17 | -0.62 | 0.4054 | 0.1757 | 0.0143 | 0.0029                                  | 0.0002 coiled-coil domain containing 72                        |
| 211936 | Ccd673  | 0.10  | -0.01 | 0.05  | -0.15 | -0.28 | 0.5550 | 0.5544 | 0.5973 | 0.2508                                  | 0.0216 coiled-coil domain containing 72                        |
| 229780 | Ccd676  | -0.15 | 0.04  | 0.09  | -0.10 | -0.13 | 0.2569 | 0.4802 | 0.2474 | 0.2213                                  | 0.1055 coiled-coil domain containing 73                        |
| 229780 | Ccd676  | -0.37 | -0.09 | -0.13 | -0.39 | -0.47 | 0.1585 | 0.4298 | 0.2741 | 0.0266                                  | 0.0055 coiled-coil domain containing 76                        |
| 67200  | Ccd677  | 0.02  | -0.25 | -0.26 | 0.17  | 0.20  | 0.6888 | 0.6425 | 0.6389 | 0.1400                                  | 0.0780 coiled-coil domain containing 76                        |
| 67200  | Ccd677  | 0.27  | -0.47 | -1.03 | -0.70 | -0.89 | 0.4445 | 0.0684 | 0.0032 | 0.0011                                  | 0.0001 coiled-coil domain containing 77                        |
| 67200  | Ccd677  | -0.01 | -0.05 | -0.17 | -0.17 | -0.17 | 0.6929 | 0.5384 | 0.2804 | 0.0544                                  | 0.0149 coiled-coil domain containing 77                        |
| 381077 | Ccd678  | -0.21 | 0.00  | -1.07 | -1.04 | -1.45 | 0.5064 | 0.5800 | 0.0074 | 0.0001                                  | 0.0000 coiled-coil domain containing 78                        |
| 320022 | Ccd679  | -0.08 | -0.02 | 0.07  | -0.04 | -0.03 | 0.4343 | 0.6447 | 0.3945 | 0.4361                                  | 0.3592 coiled-coil domain containing 79                        |
| 67896  | Ccd680  | -0.03 | -0.38 | 0.44  | 0.01  | -0.04 | 0.6854 | 0.2817 | 0.3223 | 0.5593                                  | 0.4398 coiled-coil domain containing 80                        |
| 70884  | Ccd681  | -0.12 | 0.07  | -1.07 | -0.63 | -1.25 | 0.0662 | 0.2775 | 0.1509 | 0.3892                                  | 0.0000 coiled-coil domain containing 81                        |
| 66396  | Ccd682  | -0.21 | 0.27  | 0.21  | -0.06 | 0.13  | 0.2725 | 0.1759 | 0.2059 | 0.0016                                  | 0.1153 coiled-coil domain containing 82                        |
| 66396  | Ccd682  | -0.05 | 0.12  | 0.26  | 0.10  | 0.23  | 0.5779 | 0.1859 | 0.0241 | 0.2743                                  | 0.0328 coiled-coil domain containing 82                        |
| 75338  | Ccd683  | -0.06 | 0.11  | 0.09  | -0.03 | -0.03 | 0.5716 | 0.5589 | 0.5887 | 0.4657                                  | 0.3764 coiled-coil domain containing 83                        |
| 75338  | Ccd683  | -0.01 | -0.03 | -0.14 | -0.05 | 0.01  | 0.6797 | 0.5959 | 0.1564 | 0.3761                                  | 0.4799 coiled-coil domain containing 83                        |
| 382073 | Ccd684  | -0.21 | 0.08  | -0.21 | -0.46 | -0.65 | 0.4365 | 0.6184 | 0.2314 | 0.0051                                  | 0.0001 coiled-coil domain containing 84                        |
| 216613 | Ccd685a | 0.50  | -0.26 | 0.16  | 0.66  | 1.49  | 0.2615 | 0.1715 | 0.6426 | 0.0394                                  | 0.0001 coiled-coil domain containing 85A                       |
| 216613 | Ccd685a | -0.39 | 0.91  | 0.93  | 0.12  | 0.81  | 0.4150 | 0.1079 | 0.0658 | 0.3785                                  | 0.0003 coiled-coil domain containing 85A                       |
| 216613 | Ccd685a | -0.24 | -0.16 | -0.72 | -0.90 | -0.49 | 0.4713 | 0.3583 | 0.0446 | 0.0019                                  | 0.0076 coiled-coil domain containing 85A                       |
| 240514 | Ccd685b | -1.31 | 0.92  | 0.15  | -0.29 | -0.57 | 0.1086 | 0.1044 | 0.5732 | 0.3360                                  | 0.1025 coiled-coil domain containing 85B                       |
| 240514 | Ccd685b | -1.08 | 0.76  | -0.22 | -0.62 | -0.91 | 0.1300 | 0.2450 | 0.3427 | 0.0936                                  | 0.0171 coiled-coil domain containing 85B                       |
| 106673 | Ccd686  | 0.23  | 0.52  | 1.04  | 0.93  | 1.27  | 0.5168 | 0.3702 | 0.0391 | 0.0037                                  | 0.0000 coiled-coil domain containing 86                        |
| 399599 | Ccd687  | 0.03  | -0.01 | -0.14 | -0.04 | -0.09 | 0.6249 | 0.5862 | 0.2159 | 0.4066                                  | 0.1525 coiled-coil domain containing 87                        |
| 78317  | Ccd688b | -0.37 | 0.52  | 0.19  | -0.30 | -0.65 | 0.2466 | 0.1651 | 0.1988 | 0.0995                                  | 0.0058 coiled-coil domain containing 88b                       |
| 68339  | Ccd688c | -0.08 | 0.29  | 0.23  | 0.07  | 0.25  | 0.4633 | 0.0619 | 0.0713 | 0.2674                                  | 0.0031 coiled-coil domain containing 88C                       |
| 68339  | Ccd688c | -0.14 | 0.20  | -0.10 | -0.14 | -0.45 | 0.5693 | 0.5889 | 0.3511 | 0.3353                                  | 0.0448 coiled-coil domain containing 88C                       |
| 70054  | Ccd689  | 0.18  | 0.09  | 0.15  | 0.84  | 0.84  | 0.6097 | 0.4409 | 0.3617 | 0.0007                                  | 0.0009 coiled-coil domain containing 88C                       |
| 243846 | Cdc9    | 0.07  | -0.34 | -0.56 | -0.13 | -0.25 | 0.2328 | 0.1384 | 0.0110 | 0.2104                                  | 0.0231 coiled-coil domain containing 89                        |
| 76137  | Ccd90a  | 0.32  | 1.25  | 1.15  | 0.75  | 0.70  | 0.6594 | 0.0652 | 0.0488 | 0.0077                                  | 0.0040 coiled-coil domain containing 9                         |
| 66365  | Ccd90b  | -0.23 | -0.11 | -0.44 | -0.12 | -0.52 | 0.2784 | 0.6447 | 0.5744 | 0.3549                                  | 0.0667 coiled-coil domain containing 90A                       |
| 67015  | Cdc91   | 0.46  | -0.02 | -0.19 | 0.43  | 0.40  | 0.5912 | 0.4988 | 0.6351 | 0.3339                                  | 0.0030 coiled-coil domain containing 90B                       |
| 67015  | Cdc91   | 0.36  | 0.19  | 0.10  | 0.43  | 0.51  | 0.2624 | 0.5580 | 0.3684 | 0.0431                                  | 0.0284 coiled-coil domain containing 91                        |
| 67015  | Cdc91   | -0.02 | 0.19  | 0.17  | -0.12 | 0.01  | 0.3583 | 0.5633 | 0.6291 | 0.0756                                  | 0.0320 coiled-coil domain containing 91                        |
| 215707 | Ccd92   | -0.74 | 0.22  | -0.25 | -0.54 | -0.69 | 0.6853 | 0.3827 | 0.3588 | 0.3586                                  | 0.4721 coiled-coil domain containing 91                        |
| 70929  | Ccd93   | 0.31  | -0.69 | -0.82 | -0.37 | -0.22 | 0.3023 | 0.2702 | 0.5577 | 0.0017                                  | 0.0001 coiled-coil domain containing 92                        |
| 70929  | Ccd93   | 0.12  | -0.19 | -0.36 | -0.29 | -0.37 | 0.3655 | 0.0078 | 0.0082 | 0.3335                                  | 0.0401 coiled-coil domain containing 92                        |
| 70929  | Ccd93   | 0.02  | 0.01  | -0.06 | -0.04 | 0.01  | 0.5124 | 0.1509 | 0.0205 | 0.0383                                  | 0.1585 coiled-coil domain containing 93                        |
| 72886  | Ccd94   | 0.06  | 0.06  | -0.01 | 0.11  | 0.16  | 0.6490 | 0.6354 | 0.4011 | 0.4422                                  | 0.4749 coiled-coil domain containing 93                        |
| 72886  | Ccd94   | 0.04  | 0.09  | -0.08 | 0.14  | 0.07  | 0.4462 | 0.6366 | 0.1671 | 0.0815 coiled-coil domain containing 94 |                                                                |
| 233875 | Ccd95   | -0.68 | -0.09 | -0.37 | -0.16 | -0.82 | 0.6625 | 0.6317 | 0.3407 | 0.3623                                  | 0.3794 coiled-coil domain containing 94                        |
| 66717  | Ccd96   | 0.14  | -0.10 | -0.09 | -0.08 | -0.73 | 0.4886 | 0.6342 | 0.0317 | 0.2266                                  | 0.0007 coiled-coil domain containing 95                        |
| 66717  | Ccd96   | 0.13  | -0.38 | -0.95 | -0.49 | -0.71 | 0.3857 | 0.2902 | 0.3191 | 0.2366                                  | 0.4078 coiled-coil domain containing 96                        |
| 52132  | Ccd97   | -1.46 | 0.66  | 0.27  | 0.17  | 0.19  | 0.4510 | 0.0624 | 0.0004 | 0.0001                                  | 0.0000 coiled-coil domain containing 96                        |
| 70881  | Ccd98   | 0.35  | -0.16 | -0.57 | -0.42 | -0.57 | 0.1682 | 0.1480 | 0.1685 | 0.0211                                  | 0.0085 coiled-coil domain containing 97                        |
| 70881  | Ccd98   | -0.17 | -0.08 | -0.16 | -0.25 | -0.19 | 0.1830 | 0.2299 | 0.0840 | 0.0813                                  | 0.0390 coiled-coil domain containing 98                        |
| 70881  | Ccd98   | -0.01 | -0.05 | -0.03 | -0.06 | -0.03 | 0.2462 | 0.4417 | 0.1921 | 0.0130                                  | 0.0051 coiled-coil domain containing 98                        |
| 70385  | Ccd99   | 0.25  | -0.16 | -0.08 | 0.00  | -0.01 | 0.6687 | 0.5166 | 0.5865 | 0.3199                                  | 0.3678 coiled-coil domain containing 98                        |
| 70385  | Ccd99   | -0.08 | 0.09  | 0.00  | -0.05 | -0.06 | 0.2279 | 0.1611 | 0.3124 | 0.5627                                  | 0.4662 coiled-coil domain containing 99                        |
| 66121  | Chcd1   | 0.79  | -0.28 | -0.77 | -0.36 | -0.22 | 0.4278 | 0.3069 | 0.6374 | 0.3726                                  | 0.3122 coiled-coil domain containing 99                        |
| 66121  | Chcd1   | 0.79  | -0.17 | -0.70 | 0.00  | 0.02  | 0.2565 | 0.2048 | 0.0045 | 0.1728                                  | 0.2601 coiled-coil-helix-coiled-coil-helix domain containing 1 |
| 14004  | Chcd2   | 0.33  | -0.22 | -0.47 | -0.26 | -0.21 | 0.2682 | 0.3896 | 0.0334 | 0.5636                                  | 0.4788 coiled-coil-helix-coiled-coil-helix domain containing 1 |
| 14004  | Chcd2   | 0.33  | -0.21 | -0.23 | -0.26 | -0.23 | 0.3523 | 0.3091 | 0.0793 | 0.1549                                  | 0.1922 coiled-coil-helix-coiled-coil-helix domain containing 2 |
| 66075  | Chcd3   | -0.30 | -0.02 | 0.17  | -0.49 | -0.16 | 0.3734 | 0.3311 | 0.2504 | 0.2011                                  | 0.1226 coiled-coil-helix-coiled-coil-helix domain containing 2 |
| 66075  | Chcd3   | -0.28 | -0.26 | 0.35  | 0.02  | -0.14 | 0.2676 | 0.5380 | 0.4769 | 0.0159                                  | 0.2346 coiled-coil-helix-coiled-coil-helix domain containing 3 |
| 66075  | Chcd3   | 0.03  | -0.12 | -0.50 | -0.81 | -0.89 | 0.5771 | 0.5489 | 0.5858 | 0.5447                                  | 0.1466 coiled-coil-helix-coiled-coil-helix domain containing 3 |
| 66075  | Chcd3   | 0.03  | -0.12 | -0.50 | -0.81 | -0.89 | 0.6797 | 0.4851 | 0.1100 | 0.0007                                  | 0.0000 coiled-coil-helix-coiled-coil-helix domain containing 3 |
| 72170  | Chcd4   | 0.56  | -0.11 | -0.52 | -0.15 | -0.22 | 0.1616 | 0.3143 | 0.0222 | 0.2393                                  | 0.1584 coiled-coil-helix-coiled-coil-helix domain containing 4 |
| 66170  | Chcd5   | 0.01  | -0.41 | -0.86 | -0.76 | -1.26 | 0.6989 | 0.2277 | 0.0192 | 0.0004                                  | 0.0000 coiled-coil-helix-coiled-coil-helix domain containing 5 |
| 66098  | Chcd6   | 0.26  | -0.26 | -0.72 | -0.47 | -0.93 | 0.4478 | 0.2020 | 0.0145 | 0.0263                                  | 0.0007 coiled-coil-helix-coiled-coil-helix domain containing 6 |
| 66433  | Chcd7   | -0.82 | -0.14 | -0.   |       |       |        |        |        |                                         |                                                                |



|        |         |       |       |       |       |       |        |        |        |        |                                                                                            |
|--------|---------|-------|-------|-------|-------|-------|--------|--------|--------|--------|--------------------------------------------------------------------------------------------|
| 373864 | Col27a1 | -0.08 | -0.19 | -0.24 | -0.32 | -0.36 | 0.5387 | 0.1204 | 0.0446 | 0.0102 | 0.0022 collagen, type XXVII, alpha 1                                                       |
| 373864 | Col27a1 | 0.10  | 0.11  | -0.01 | -0.04 | -0.30 | 0.6167 | 0.6310 | 0.5455 | 0.5269 | 0.0531 collagen, type XXVII, alpha 1                                                       |
| 373864 | Col27a1 | -0.03 | 0.15  | 0.32  | 0.10  | -0.06 | 0.4802 | 0.2961 | 0.0290 | 0.3166 | 0.4683 collagen, type XXVII, alpha 1                                                       |
| 213945 | Col28a1 | -0.08 | -0.10 | 0.01  | -0.08 | 0.01  | 0.6514 | 0.2809 | 0.6186 | 0.3358 | 0.3242 collagen, type XXVIII, alpha 1                                                      |
| 239447 | Cmp1    | 0.05  | 0.16  | 0.06  | 0.13  | 0.06  | 0.5768 | 0.3083 | 0.4850 | 0.0828 | 0.3311 collapin response mediator protein 1                                                |
| 71693  | Colc10  | 0.17  | -0.24 | 0.08  | 0.22  | 0.24  | 0.4295 | 0.1607 | 0.4374 | 0.1703 | 0.0778 collectin sub-family member 10                                                      |
| 140792 | Colc11  | -0.33 | -0.31 | -0.29 | -0.16 | -0.21 | 0.5698 | 0.1654 | 0.0185 | 0.1458 | 0.0627 collectin sub-family member 11                                                      |
| 140792 | Colc12  | 0.53  | -0.19 | 0.08  | 0.16  | 0.70  | 0.1992 | 0.2699 | 0.6217 | 0.3176 | 0.0054 collectin sub-family member 12                                                      |
| 12977  | Cs1     | -0.44 | -0.20 | 0.12  | -0.15 | -0.22 | 0.6237 | 0.3574 | 0.6113 | 0.3038 | 0.1525 collectin sub-family member 12                                                      |
| 12977  | Cs1     | -0.44 | -0.45 | -0.10 | -0.92 | -0.79 | 0.3124 | 0.4240 | 0.5676 | 0.0001 | 0.0001 colony stimulating factor 1 (macrophage)                                            |
| 12977  | Cs1     | -0.36 | -0.41 | -0.26 | -0.96 | -0.68 | 0.3595 | 0.4277 | 0.5689 | 0.0002 | 0.0000 colony stimulating factor 1 (macrophage)                                            |
| 12977  | Cs1     | -0.19 | -0.38 | -0.21 | -0.92 | -0.67 | 0.3835 | 0.0861 | 0.2044 | 0.0020 | 0.0010 colony stimulating factor 1 (macrophage)                                            |
| 12977  | Cs1     | -0.69 | -0.45 | -0.13 | -0.93 | -0.70 | 0.3952 | 0.6361 | 0.4761 | 0.0009 | 0.0000 colony stimulating factor 1 (macrophage)                                            |
| 12977  | Cs1     | -0.89 | -0.45 | -0.13 | -0.86 | -0.66 | 0.4224 | 0.6232 | 0.4672 | 0.0009 | 0.0000 colony stimulating factor 1 (macrophage)                                            |
| 12977  | Cs1     | -0.09 | -0.38 | -0.22 | -0.88 | -0.56 | 0.5926 | 0.0751 | 0.2392 | 0.0025 | 0.0059 colony stimulating factor 1 (macrophage)                                            |
| 12977  | Cs1     | -0.07 | -0.51 | -0.24 | -0.86 | -0.62 | 0.6189 | 0.1347 | 0.3904 | 0.0002 | 0.0001 colony stimulating factor 1 (macrophage)                                            |
| 12977  | Cs1     | -0.48 | -0.44 | -0.27 | -0.89 | -0.61 | 0.6882 | 0.0768 | 0.2376 | 0.0002 | 0.0001 colony stimulating factor 1 (macrophage)                                            |
| 12977  | Cs1     | -0.02 | -0.48 | -0.31 | -0.93 | -0.61 | 0.6884 | 0.0943 | 0.1889 | 0.0038 | 0.0062 colony stimulating factor 1 (macrophage)                                            |
| 12977  | Cs1     | -0.01 | -0.33 | -0.17 | -0.89 | -0.52 | 0.6934 | 0.0968 | 0.2845 | 0.0084 | 0.0331 colony stimulating factor 1 (macrophage)                                            |
| 12978  | Cs1r    | -0.26 | 0.06  | 0.10  | -0.09 | -0.27 | 0.1823 | 0.5829 | 0.4740 | 0.3527 | 0.0143 colony stimulating factor 1 receptor                                                |
| 12978  | Cs1r    | 0.37  | -0.84 | -0.44 | 0.19  | 0.03  | 0.3787 | 0.0457 | 0.1022 | 0.3709 | 0.4699 colony stimulating factor 1 receptor                                                |
| 12978  | Cs1r    | 0.33  | -0.59 | -0.03 | 0.48  | 0.43  | 0.4311 | 0.1463 | 0.5382 | 0.1425 | 0.0393 colony stimulating factor 1 receptor                                                |
| 12981  | Cs2     | 0.33  | -1.16 | -1.03 | -0.91 | -1.02 | 0.3836 | 0.0011 | 0.0006 | 0.0001 | 0.0000 colony stimulating factor 2 (granulocyte-macrophage)                                |
| 12981  | Cs2     | -0.26 | -1.10 | -0.93 | -1.00 | -1.10 | 0.4048 | 0.0106 | 0.0136 | 0.0002 | 0.0000 colony stimulating factor 2 (granulocyte-macrophage)                                |
| 12981  | Cs2     | 0.22  | -1.02 | -0.91 | -0.85 | -0.94 | 0.4169 | 0.0027 | 0.0011 | 0.0005 | 0.0000 colony stimulating factor 2 (granulocyte-macrophage)                                |
| 12981  | Cs2     | -0.10 | -0.91 | -1.07 | -0.97 | -1.10 | 0.4633 | 0.0007 | 0.0001 | 0.0005 | 0.0000 colony stimulating factor 2 (granulocyte-macrophage)                                |
| 12981  | Cs2     | 0.17  | -0.86 | -0.94 | -0.90 | -0.87 | 0.5191 | 0.0075 | 0.0031 | 0.0004 | 0.0000 colony stimulating factor 2 (granulocyte-macrophage)                                |
| 12981  | Cs2     | 0.13  | -0.90 | -0.83 | -0.87 | -1.07 | 0.5335 | 0.0044 | 0.0003 | 0.0001 | 0.0000 colony stimulating factor 2 (granulocyte-macrophage)                                |
| 12981  | Cs2     | 0.13  | -0.91 | -1.02 | -0.91 | -0.98 | 0.5490 | 0.0051 | 0.0019 | 0.0001 | 0.0000 colony stimulating factor 2 (granulocyte-macrophage)                                |
| 12981  | Cs2     | -0.04 | -0.93 | -0.82 | -1.08 | -1.13 | 0.6542 | 0.0020 | 0.0012 | 0.0001 | 0.0000 colony stimulating factor 2 (granulocyte-macrophage)                                |
| 12981  | Cs2     | 0.02  | -1.10 | -0.99 | -0.99 | -1.06 | 0.6689 | 0.0003 | 0.0005 | 0.0000 | 0.0000 colony stimulating factor 2 (granulocyte-macrophage)                                |
| 12981  | Cs2     | 0.02  | -0.94 | -0.97 | -1.01 | -1.07 | 0.6747 | 0.0016 | 0.0009 | 0.0000 | 0.0000 colony stimulating factor 2 (granulocyte-macrophage)                                |
| 12982  | Cs2ra   | 0.02  | -0.45 | 0.12  | 0.35  | 0.33  | 0.5705 | 0.6262 | 0.3482 | 0.2097 | 0.0000 colony stimulating factor 2 (granulocyte-macrophage)                                |
| 12984  | Cs2rb2  | 0.88  | -0.36 | 0.00  | 0.28  | 0.33  | 0.1358 | 0.3020 | 0.5485 | 0.2888 | 0.1228 colony stimulating factor 2 receptor, beta 2, low-affinity (granulocyte-macrophage) |
| 12983  | Cs2rb   | 0.12  | -0.20 | 0.06  | 0.09  | 0.20  | 0.3444 | 0.2092 | 0.3085 | 0.2454 | 0.0092 colony stimulating factor 2 receptor, beta, low-affinity (granulocyte-macrophage)   |
| 12983  | Cs2rb   | 0.39  | -0.86 | -0.56 | 0.09  | -0.03 | 0.4085 | 0.0518 | 0.0513 | 0.5052 | 0.4714 colony stimulating factor 2 receptor, beta, low-affinity (granulocyte-macrophage)   |
| 12983  | Cs2rb   | -0.06 | 0.34  | 0.56  | 0.10  | 0.16  | 0.6572 | 0.5479 | 0.2808 | 0.3492 | 0.1908 colony stimulating factor 2 receptor, beta, low-affinity (granulocyte-macrophage)   |
| 12983  | Cs2rb   | 0.15  | 0.76  | 0.96  | 0.95  | 0.83  | 0.5112 | 0.0865 | 0.0072 | 0.0000 | 0.0004 colony stimulating factor 3 (granulocyte)                                           |
| 12985  | Cs3     | 0.03  | 0.12  | 0.06  | 0.00  | -0.02 | 0.6831 | 0.5616 | 0.4746 | 0.5614 | 0.0485 colony stimulating factor 3 receptor (granulocyte)                                  |
| 12986  | Cs3r    | 0.03  | 0.76  | 0.39  | 0.62  | 0.89  | 0.6931 | 0.1665 | 0.4538 | 0.2052 | 0.0485 colony stimulating factor 3 receptor (granulocyte)                                  |
| 17946  | Commd1  | 0.29  | -0.43 | -0.71 | -0.20 | -0.24 | 0.4475 | 0.0466 | 0.0208 | 0.2094 | 0.2271 COMM domain containing 1                                                            |
| 17946  | Commd1  | -0.24 | -0.11 | -0.27 | -0.30 | -0.36 | 0.5021 | 0.4196 | 0.1637 | 0.0885 | 0.1282 COMM domain containing 1                                                            |
| 17946  | Commd1  | -0.01 | -0.16 | -0.28 | -0.42 | -0.68 | 0.7000 | 0.3648 | 0.4120 | 0.2647 | 0.2008 COMM domain containing 10                                                           |
| 69456  | Commd10 | -0.28 | -0.12 | -0.03 | 0.09  | -0.15 | 0.5368 | 0.4961 | 0.0582 | 0.0360 | 0.0366 COMM domain containing 2                                                            |
| 52245  | Commd2  | -0.05 | -0.19 | -0.20 | -0.19 | -0.18 | 0.5875 | 0.0795 | 0.0582 | 0.0360 | 0.0243 COMM domain containing 2                                                            |
| 52245  | Commd2  | 0.08  | -0.21 | -0.10 | -0.32 | -0.38 | 0.6346 | 0.3940 | 0.4146 | 0.1440 | 0.0243 COMM domain containing 2                                                            |
| 12238  | Commd3  | -0.50 | 0.01  | 0.02  | -0.14 | -0.12 | 0.4188 | 0.4311 | 0.4067 | 0.2962 | 0.2497 COMM domain containing 3                                                            |
| 66199  | Commd4  | 0.03  | 0.12  | 0.06  | 0.00  | -0.02 | 0.6831 | 0.5616 | 0.4746 | 0.5614 | 0.4601 COMM domain containing 4                                                            |
| 66398  | Commd5  | -0.28 | -0.03 | -0.38 | -0.61 | -0.93 | 0.4518 | 0.5008 | 0.1284 | 0.0083 | 0.0010 COMM domain containing 5                                                            |
| 66200  | Commd6  | 0.60  | -0.51 | -0.62 | -0.21 | -0.06 | 0.2275 | 0.0457 | 0.1016 | 0.3358 | 0.4238 COMM domain containing 6                                                            |
| 99311  | Commd7  | -0.08 | -0.04 | -0.01 | -0.01 | -0.08 | 0.4537 | 0.6128 | 0.6224 | 0.5448 | 0.1760 COMM domain containing 6                                                            |
| 27784  | Commd8  | 0.95  | 0.22  | 0.67  | -0.67 | -0.70 | 0.5463 | 0.4069 | 0.0375 | 0.0264 | 0.0013 COMM domain containing 7                                                            |
| 27784  | Commd8  | 0.23  | 0.42  | 0.23  | 0.33  | 0.29  | 0.4904 | 0.0799 | 0.3899 | 0.0069 | 0.0000 COMM domain containing 8                                                            |
| 76501  | Commd9  | -0.26 | 0.33  | 0.02  | -0.17 | -0.17 | 0.4121 | 0.4060 | 0.4680 | 0.2553 | 0.0246 COMM domain containing 8                                                            |
| 12946  | Cr1l    | 0.22  | -0.20 | -0.06 | 0.12  | 0.42  | 0.4287 | 0.5810 | 0.6018 | 0.3419 | 0.1932 COMM domain containing 9                                                            |
| 12946  | Cr1l    | -0.04 | -0.05 | -0.14 | -0.08 | -0.03 | 0.6156 | 0.4393 | 0.1174 | 0.3093 | 0.0315 complement component (3b/4b) receptor 1-like                                        |
| 12261  | Cr1qb   | 0.39  | -0.04 | -0.12 | -0.01 | 0.07  | 0.1770 | 0.4066 | 0.3363 | 0.5493 | 0.3277 complement component 1, q subcomponent binding protein                              |
| 12259  | Cr1qa   | 0.59  | 0.02  | 0.06  | 0.38  | 0.41  | 0.2791 | 0.5036 | 0.5339 | 0.2394 | 0.1081 complement component 1, q subcomponent, alpha polypeptide                           |
| 12260  | Cr1qb   | -0.02 | 0.10  | 0.60  | 0.29  | 0.09  | 0.6905 | 0.5960 | 0.0283 | 0.3418 | 0.4105 complement component 1, q subcomponent, beta polypeptide                            |
| 12262  | Cr1qc   | 0.28  | -0.11 | -0.02 | -0.05 | -0.21 | 0.4173 | 0.4380 | 0.5379 | 0.5045 | 0.1854 complement component 1, q subcomponent, C chain                                     |
| 23929  | Cr1ql1  | -0.05 | -0.03 | -0.05 | -0.09 | -0.08 | 0.5575 | 0.4818 | 0.4321 | 0.1876 | 0.1903 complement component 1, q subcomponent-like 1                                       |
| 23929  | Cr1ql2  | -0.08 | 0.14  | 0.08  | 0.00  | -0.09 | 0.5438 | 0.1363 | 0.3021 | 0.5599 | 0.2972 complement component 1, q subcomponent-like 2                                       |
| 59099  | Cr1r    | -0.57 | 0.12  | 0.25  | -0.04 | -0.12 | 0.4665 | 0.3551 | 0.3794 | 0.5134 | 0.3002 complement component 1, r subcomponent                                              |
| 232371 | Cr1r    | 0.38  | -0.11 | -0.02 | 0.24  | 0.00  | 0.4288 | 0.3319 | 0.3794 | 0.1446 | 0.4913 complement component 1, r subcomponent                                              |
| 59098  | Cr1s    | 0.43  | -0.28 | 0.06  | 0.50  | 0.89  | 0.3474 | 0.3430 | 0.5912 | 0.0592 | 0.0013 complement component 1, s subcomponent                                              |
| 12263  | C       |       |       |       |       |       |        |        |        |        |                                                                                            |

|        |          |       |       |       |       |        |        |        |        |                                      |                                      |
|--------|----------|-------|-------|-------|-------|--------|--------|--------|--------|--------------------------------------|--------------------------------------|
| 12628  | Ch       | 0.84  | -0.89 | -0.34 | 0.74  | 1.10   | 0.1104 | 0.1186 | 0.4334 | 0.0338                               | 0.0012 complement component factor h |
| 12628  | Ch       | 0.78  | -1.25 | -0.73 | 0.30  | 0.50   | 0.1249 | 0.0865 | 0.2402 | 0.0299 complement component factor h |                                      |
| 12628  | Ch       | 0.88  | -0.85 | -0.33 | 0.49  | 1.08   | 0.1358 | 0.0791 | 0.3705 | 0.0013 complement component factor h |                                      |
| 12628  | Ch       | 0.11  | -0.02 | -0.07 | 0.05  | 0.18   | 0.3840 | 0.5419 | 0.4126 | 0.0221 complement component factor h |                                      |
| 12628  | Ch       | 0.39  | -0.47 | 0.27  | 0.03  | 0.25   | 0.4746 | 0.5650 | 0.6248 | 0.2055 complement component factor h |                                      |
| 12630  | Ch       | 0.16  | -0.39 | 0.20  | 0.25  | 0.21   | 0.5735 | 0.2143 | 0.5764 | 0.3256 complement component factor h |                                      |
| 14862  | Ch       | 0.17  | -0.11 | -0.23 | 0.19  | 0.12   | 0.4651 | 0.6206 | 0.5707 | 0.3511 complement component factor i |                                      |
| 11537  | Cld      | 0.04  | 0.03  | -0.40 | -0.23 | 0.5814 | 0.5943 | 0.5814 | 0.4547 | 0.2658                               |                                      |
| 57072  | Cld      | 1.58  | -1.22 | -0.94 | 1.10  | -0.01  | 0.3423 | 0.1913 | 0.4354 | 0.3080                               |                                      |
| 18636  | Cfp      | -0.07 | -0.04 | 0.00  | 0.02  | -0.09  | 0.5075 | 0.4974 | 0.6386 | 0.5121                               |                                      |
| 12902  | C2       | -0.02 | 0.04  | -0.07 | -0.35 | -0.46  | 0.6884 | 0.6466 | 0.5328 | 0.1767                               |                                      |
| 12902  | C2       | 0.13  | -0.48 | -0.93 | -0.55 | -0.72  | 0.5480 | 0.0294 | 0.0010 | 0.0016                               |                                      |
| 12889  | Cpk1     | 0.07  | -0.05 | 0.09  | 0.01  | -0.07  | 0.5708 | 0.3387 | 0.6392 | 0.5394                               |                                      |
| 12890  | Cpk2     | -0.11 | 0.21  | 0.30  | 0.05  | 0.20   | 0.4616 | 0.0779 | 0.0200 | 0.4511                               |                                      |
| 12890  | Cpk2     | -0.17 | 0.60  | 0.12  | -0.37 | 0.05   | 0.3189 | 0.0009 | 0.3039 | 0.4310                               |                                      |
| 12890  | Cpk2     | -0.48 | 1.06  | 0.12  | -0.37 | -0.50  | 0.3433 | 0.0117 | 0.4179 | 0.2769                               |                                      |
| 12890  | Cpk2     | -0.10 | 0.08  | -0.10 | -0.03 | 0.01   | 0.4576 | 0.3566 | 0.3756 | 0.4540                               |                                      |
| 235415 | Cpk3     | 0.30  | -0.03 | 0.02  | -0.04 | -0.26  | 0.5742 | 0.6094 | 0.4311 | 0.4070                               |                                      |
| 235415 | Cpk3     | 0.34  | -0.04 | 0.00  | -0.08 | 0.04   | 0.4171 | 0.3962 | 0.4308 | 0.3829                               |                                      |
| 225644 | Cpk4     | -0.09 | -0.04 | -0.01 | -0.05 | -0.08  | 0.3834 | 0.3987 | 0.3932 | 0.3911                               |                                      |
| 16834  | Cg1      | -0.09 | -0.09 | 0.04  | -0.01 | -0.05  | 0.5801 | 0.4721 | 0.5886 | 0.4826                               |                                      |
| 76332  | Cg2      | 0.13  | 0.39  | 0.59  | 0.67  | 0.80   | 0.5846 | 0.4444 | 0.2079 | 0.0004                               |                                      |
| 76332  | Cg2      | -0.13 | 0.06  | 0.30  | 0.24  | 0.58   | 0.5401 | 0.3619 | 0.0839 | 0.1432                               |                                      |
| 338337 | Cg3      | -0.05 | -0.28 | 0.10  | 0.25  | 0.67   | 0.6714 | 0.6388 | 0.3191 | 0.0701                               |                                      |
| 102339 | Cg4      | -1.02 | -0.16 | -0.39 | -0.54 | -1.05  | 0.3456 | 0.1687 | 0.3685 | 0.0370                               |                                      |
| 102339 | Cg4      | 0.07  | -0.40 | -0.02 | -0.43 | -0.46  | 0.5498 | 0.4115 | 0.6405 | 0.5323                               |                                      |
| 102339 | Cg4      | 0.13  | -0.43 | -0.29 | -0.46 | -0.46  | 0.5636 | 0.0613 | 0.0276 | 0.1728                               |                                      |
| 102339 | Cg4      | 0.04  | -0.09 | 0.00  | 0.03  | 0.01   | 0.5939 | 0.3976 | 0.5740 | 0.4817                               |                                      |
| 67542  | Cg6      | -0.47 | -0.46 | -0.57 | -0.23 | -0.61  | 0.4765 | 0.6546 | 0.5957 | 0.0493                               |                                      |
| 233924 | Cg7      | 0.83  | 0.36  | 0.41  | 0.15  | 0.04   | 0.3569 | 0.2500 | 0.2069 | 0.1106                               |                                      |
| 97484  | Cg8      | 0.45  | -0.50 | -0.71 | -0.31 | -0.37  | 0.1657 | 0.0318 | 0.0054 | 0.0161                               |                                      |
| 97484  | Cg8      | 0.08  | -0.01 | 0.30  | 0.20  | 0.70   | 0.3947 | 0.5180 | 0.3944 | 0.1826                               |                                      |
| 114564 | Csprs    | 0.08  | 0.01  | -0.10 | -0.03 | 0.02   | 0.4518 | 0.5386 | 0.3375 | 0.4673                               |                                      |
| 114564 | Csprs    | 0.13  | 0.42  | 0.07  | -0.04 | 0.02   | 0.5783 | 0.4363 | 0.4911 | 0.4642                               |                                      |
| 12951  | Crx      | 0.17  | -0.01 | -0.01 | 0.11  | 0.14   | 0.5507 | 0.5408 | 0.5052 | 0.4526                               |                                      |
| 68968  | Cdan1    | -0.13 | -0.01 | 0.11  | -0.04 | 0.14   | 0.4551 | 0.5308 | 0.5885 | 0.4920                               |                                      |
| 14219  | Ctcf     | 0.52  | 0.04  | 0.46  | 0.88  | 1.16   | 0.5434 | 0.4973 | 0.6313 | 0.5455                               |                                      |
| 245084 | Cnks1/2  | -0.02 | -0.01 | 0.00  | -0.02 | -0.03  | 0.2205 | 0.5815 | 0.3449 | 0.0080                               |                                      |
| 12675  | Chuk     | 0.21  | -0.20 | 0.14  | 0.02  | 0.14   | 0.3781 | 0.6300 | 0.6194 | 0.6046                               |                                      |
| 12675  | Chuk     | 0.30  | -0.18 | -0.24 | -0.43 | -0.25  | 0.4410 | 0.6213 | 0.6333 | 0.5177                               |                                      |
| 12805  | Ctnn1    | -0.17 | -0.09 | -0.03 | 0.00  | 0.22   | 0.2286 | 0.3561 | 0.5544 | 0.5577                               |                                      |
| 12805  | Ctnn1    | 0.01  | -0.01 | 0.02  | -0.05 | 0.11   | 0.6831 | 0.4297 | 0.4933 | 0.4082                               |                                      |
| 21367  | Ctnn2    | 0.12  | 0.02  | 0.09  | 0.16  | 0.01   | 0.4478 | 0.5531 | 0.6097 | 0.2335                               |                                      |
| 21367  | Ctnn2    | 0.06  | 0.05  | 0.03  | -0.04 | 0.02   | 0.5637 | 0.6466 | 0.5924 | 0.4545                               |                                      |
| 21367  | Ctnn2    | 0.01  | -0.05 | 0.00  | 0.00  | 0.00   | 0.6741 | 0.5502 | 0.6153 | 0.5547                               |                                      |
| 21367  | Ctnn2    | 0.01  | -0.07 | -0.03 | 0.00  | 0.13   | 0.5205 | 0.3598 | 0.5610 | 0.4582                               |                                      |
| 18488  | Ctnn3    | 0.10  | -0.09 | -0.14 | 0.09  | 0.06   | 0.2155 | 0.2939 | 0.1427 | 0.1964                               |                                      |
| 269784 | Ctnn4    | 0.15  | -0.09 | -0.01 | 0.06  | 0.02   | 0.5115 | 0.6394 | 0.4533 | 0.4921                               |                                      |
| 269784 | Ctnn4    | 0.06  | 0.01  | 0.06  | 0.02  | 0.04   | 0.6113 | 0.3538 | 0.3841 | 0.4885                               |                                      |
| 269784 | Ctnn4    | 0.04  | 0.33  | -0.06 | -0.02 | -0.04  | 0.6958 | 0.6423 | 0.5638 | 0.5006                               |                                      |
| 269784 | Ctnn4    | 0.00  | 0.04  | 0.02  | 0.02  | -0.05  | 0.5079 | 0.5390 | 0.5138 | 0.5576                               |                                      |
| 244682 | Ctnn5    | -0.08 | 0.03  | 0.05  | -0.01 | -0.08  | 0.3411 | 0.3806 | 0.1913 | 0.1744                               |                                      |
| 244682 | Ctnn5    | -0.05 | 0.10  | 0.11  | -0.08 | -0.20  | 0.5290 | 0.3411 | 0.3806 | 0.1913                               |                                      |
| 244682 | Ctnn5    | 0.02  | 0.04  | 0.02  | 0.00  | 0.11   | 0.6486 | 0.5122 | 0.5631 | 0.5566                               |                                      |
| 53870  | Ctnn6    | -0.11 | -0.05 | -0.05 | -0.14 | -0.05  | 0.4329 | 0.4106 | 0.4080 | 0.0853                               |                                      |
| 53870  | Ctnn6    | 0.05  | 0.01  | 0.14  | 0.06  | -0.05  | 0.5772 | 0.6069 | 0.2691 | 0.4232                               |                                      |
| 53870  | Ctnn6    | 0.06  | -0.09 | 0.06  | 0.20  | -0.02  | 0.5234 | 0.3513 | 0.5124 | 0.1188                               |                                      |
| 53321  | Ctnnap1  | 0.21  | 0.00  | 0.21  | 0.04  | -0.17  | 0.5745 | 0.4188 | 0.5564 | 0.4953                               |                                      |
| 53321  | Ctnnap1  | 0.11  | 0.04  | -0.08 | 0.07  | 0.03   | 0.4163 | 0.6379 | 0.2812 | 0.3394                               |                                      |
| 66797  | Ctnnap2  | -0.15 | 0.09  | 0.01  | -0.19 | -0.18  | 0.4790 | 0.6425 | 0.5010 | 0.1647                               |                                      |
| 66797  | Ctnnap2  | -0.05 | -0.06 | -0.05 | -0.12 | -0.13  | 0.3084 | 0.4243 | 0.6333 | 0.1104                               |                                      |
| 236880 | Ctnnap3  | -0.05 | -0.06 | -0.05 | -0.04 | 0.00   | 0.4618 | 0.2467 | 0.6333 | 0.4243                               |                                      |
| 170571 | Ctnnap4  | -0.07 | 0.13  | 0.02  | -0.04 | 0.00   | 0.5736 | 0.3078 | 0.6254 | 0.5073                               |                                      |
| 170571 | Ctnnap4  | -0.05 | -0.04 | 0.03  | 0.02  | -0.10  | 0.5728 | 0.4215 | 0.5302 | 0.3842                               |                                      |
| 170571 | Ctnnap4  | -0.01 | -0.01 | 0.05  | -0.05 | -0.06  | 0.6629 | 0.5833 | 0.5302 | 0.3842                               |                                      |
| 170571 | Ctnnap4  | 0.01  | -0.01 | 0.02  | 0.02  | -0.06  | 0.6833 | 0.6315 | 0.5860 | 0.5171                               |                                      |
| 636908 | Ctnnap5a | 0.09  | 0.02  | -0.01 | 0.05  | 0.08   | 0.3791 | 0.6536 | 0.5483 | 0.3469                               |                                      |
| 620292 | Ctnnap5c | -0.03 | 0.04  | 0.10  | 0.02  | 0.02   | 0.6250 | 0.5811 | 0.3788 | 0.5021                               |                                      |
| 12848  | Cops2    | -0.05 | 0.00  | 0.08  | -0.12 | -0.03  | 0.4618 | 0.5068 | 0.4867 | 0.5055                               |                                      |
| 12848  | Cops2    | 0.24  | -0.86 | -0.55 | 0.12  | 0.39   | 0.5634 | 0.2885 | 0.1145 | 0.3592                               |                                      |
| 26572  | Cops3    | 0.42  | -0.67 | -0.34 | 0.16  | 0.47   | 0.6269 | 0.5840 | 0.6133 | 0.3629                               |                                      |
| 26572  | Cops3    | -0.19 | -0.17 | -0.04 | -0.20 | 0.05   | 0.4261 | 0.0931 | 0.3064 | 0.4108                               |                                      |
| 26754  | Cops5    | -0.11 | -0.70 | -0.51 | -0.03 | 0.25   | 0.5390 | 0.6234 | 0.4839 | 0.2416                               |                                      |
| 26754  | Cops5    | -0.11 | 0.23  | 0.20  | 0.15  | 0.26   | 0.3939 | 0.0646 | 0.0944 | 0.5265                               |                                      |
| 26893  | Cops6    | -0.88 | -0.88 | -0.80 | 0.26  | 0.56   | 0.2871 | 0.0885 | 0.0567 | 0.3599                               |                                      |
| 26893  | Cops6    | 0.32  | -0.57 | -0.80 | -0.20 | -0.25  | 0.2996 | 0.0142 | 0.0015 | 0.2735                               |                                      |
| 26893  | Cops6    | 0.54  | -0.01 | 0.34  | 0.58  | 0.54   | 0.1620 | 0.5319 | 0.3076 | 0.0092                               |                                      |
| 26894  | Cops7a   | 0.38  | -0.48 | -0.43 | -0.11 | -0.34  | 0.3380 | 0.0922 | 0.0615 | 0.3324                               |                                      |
| 26895  | Cops7a   | 0.19  | -0.51 | -0.66 | -0.25 | -0.39  | 0.1871 | 0.0099 | 0.0014 | 0.0398                               |                                      |
| 26895  | Cops7b   | -0.02 | 0.06  | 0.08  | 0.03  | 0.01   | 0.6658 | 0.4496 | 0.3629 | 0.0665                               |                                      |
| 106979 | Cops8    | -0.13 | -0.05 | 0.77  | 0.60  | 1.07   | 0.5396 | 0.5677 | 0.0313 | 0.0420                               |                                      |
| 211232 | Cpne1    | 0.06  | 0.09  | 0.09  | 0.09  | 0.08   | 0.5548 | 0.5620 | 0.5236 | 0.1914                               |                                      |
| 211232 | Cpne1    | 0.78  | -1.01 | -0.75 | -0.08 | -0.18  | 0.0729 | 0.0573 | 0.2321 | 0.4641                               |                                      |
| 266692 |          |       |       |       |       |        |        |        |        |                                      |                                      |

|        |         |       |       |       |       |       |        |        |        |        |                                                                                          |
|--------|---------|-------|-------|-------|-------|-------|--------|--------|--------|--------|------------------------------------------------------------------------------------------|
| 240058 | Cpne5   | -0.73 | 0.21  | 0.05  | 0.11  | -0.10 | 0.4277 | 0.3250 | 0.3769 | 0.3946 | 0.3695 copine V                                                                          |
| 240058 | Cpne5   | 0.06  | 0.04  | 0.00  | 0.05  | 0.11  | 0.5384 | 0.6285 | 0.5713 | 0.3665 | 0.1518 copine V                                                                          |
| 240058 | Cpne5   | 0.10  | 0.33  | 0.30  | 0.21  | 0.23  | 0.4596 | 0.4596 | 0.5038 | 0.1404 | 0.0725 copine V                                                                          |
| 12891  | Cpne6   | -0.03 | 0.07  | 0.06  | 0.04  | 0.04  | 0.5983 | 0.4335 | 0.5198 | 0.4172 | 0.3892 copine VI                                                                         |
| 102278 | Cpne7   | -0.06 | 0.25  | 0.10  | 0.37  | 0.19  | 0.6217 | 0.1689 | 0.6341 | 0.0021 | 0.0534 copine VII                                                                        |
| 66871  | Cpne8   | 0.56  | 0.26  | 0.14  | 0.33  | 0.66  | 0.1214 | 0.5888 | 0.6341 | 0.0425 | 0.0016 copine VIII                                                                       |
| 66871  | Cpne8   | 0.35  | -0.47 | -0.21 | 0.29  | 0.64  | 0.3507 | 0.1333 | 0.3315 | 0.1754 | 0.0007 copine VIII                                                                       |
| 12460  | Ccs     | -0.18 | -0.17 | -0.38 | -0.48 | -0.50 | 0.5193 | 0.2911 | 0.0671 | 0.0290 | 0.0126 copper chaperone for superoxide dismutase                                         |
| 12460  | Ccs     | -0.15 | -0.24 | -0.24 | -0.07 | -0.09 | 0.5629 | 0.2723 | 0.3898 | 0.4988 | 0.4050 copper chaperone for superoxide dismutase                                         |
| 12892  | Cpox    | -0.43 | -0.68 | -0.68 | -0.59 | -0.66 | 0.6056 | 0.1062 | 0.0140 | 0.0027 | 0.0018 coproporphyrinogen oxidase                                                        |
| 12892  | Cpox    | 0.09  | -0.45 | 0.37  | 0.06  | 0.34  | 0.5619 | 0.5468 | 0.3535 | 0.4570 | 0.0571 cordon-bleu                                                                       |
| 12808  | Cobl    | 0.13  | 0.24  | 0.37  | -0.01 | 0.34  | 0.5619 | 0.5468 | 0.3535 | 0.4570 | 0.0571 cordon-bleu                                                                       |
| 94192  | Cigt11  | 0.72  | -0.86 | -0.73 | -0.01 | -0.32 | 0.1108 | 0.0088 | 0.0061 | 0.5516 | 0.0877 core 1 synthase, glycoprotein-N-acetylglucosamine 3-beta-galactosyltransferase, 1 |
| 94192  | Cigt11  | 0.41  | -0.26 | -0.35 | -0.11 | -0.06 | 0.2918 | 0.2039 | 0.0985 | 0.2857 | 0.2947 core 1 synthase, glycoprotein-N-acetylglucosamine 3-beta-galactosyltransferase, 1 |
| 12400  | Ctbf    | 0.59  | -1.09 | -0.74 | -0.10 | -0.04 | 0.1851 | 0.0065 | 0.0171 | 0.4485 | 0.4486 core binding factor beta                                                          |
| 12400  | Ctbf    | 0.59  | -1.09 | -0.74 | -0.10 | -0.04 | 0.2307 | 0.2012 | 0.1709 | 0.5251 | 0.3263 core-binding factor beta                                                          |
| 12400  | Ctbf    | 0.42  | -0.04 | -0.07 | -0.03 | 0.08  | 0.5844 | 0.6026 | 0.5033 | 0.4765 | 0.3387 core-binding factor, runt domain, alpha subunit 2, translocated to, 2 (human)     |
| 12396  | Ctbf212 | 0.04  | -0.04 | -0.07 | -0.03 | 0.05  | 0.6227 | 0.2719 | 0.0097 | 0.0508 | 0.0001 core-binding factor, runt domain, alpha subunit 2, translocated to, 2 (human)     |
| 12396  | Ctbf212 | -0.05 | 0.31  | 0.66  | 0.35  | 0.69  | 0.6233 | 0.3357 | 0.2929 | 0.5615 | 0.0287 core-binding factor, runt domain, alpha subunit 2, translocated to, 2 (human)     |
| 12396  | Ctbf212 | -0.04 | 0.17  | 0.19  | 0.00  | 0.17  | 0.2690 | 0.2771 | 0.5487 | 0.1257 | 0.0011 core-binding factor, runt domain, alpha subunit 2, translocated to, 3 (human)     |
| 12398  | Ctbf213 | -1.17 | 0.30  | -0.32 | -0.39 | -1.05 | 0.4820 | 0.5816 | 0.1083 | 0.2578 | 0.0098 core-binding factor, runt domain, alpha subunit 2, translocated to, 3 (human)     |
| 12398  |         |       |       |       |       |       |        |        |        |        |                                                                                          |

|        |        |       |       |       |       |       |        |        |        |                                                             |
|--------|--------|-------|-------|-------|-------|-------|--------|--------|--------|-------------------------------------------------------------|
| 12957  | Cryba1 | 0.05  | -0.03 | -0.06 | 0.03  | 0.05  | 0.5675 | 0.4094 | 0.4257 | 0.2778 crystallin, beta A1                                  |
| 12958  | Cryba2 | -0.12 | 0.06  | 0.18  | 0.06  | -0.06 | 0.5392 | 0.4783 | 0.4992 | 0.3873 crystallin, beta A2                                  |
| 12959  | Cryba4 | 0.14  | 0.09  | 0.01  | 0.05  | 0.02  | 0.3685 | 0.6090 | 0.4215 | 0.2727 crystallin, beta A4                                  |
| 12960  | Crybb1 | -0.04 | 0.05  | 0.05  | 0.00  | 0.02  | 0.4866 | 0.4389 | 0.5563 | 0.4376 crystallin, beta B1                                  |
| 12961  | Crybb2 | -0.07 | 0.10  | -0.12 | 0.02  | 0.03  | 0.5589 | 0.4661 | 0.5032 | 0.4096 crystallin, beta B1                                  |
| 12962  | Crybb3 | 0.12  | -0.07 | 0.04  | -0.02 | -0.10 | 0.6037 | 0.2950 | 0.4917 | 0.1039 crystallin, beta B2                                  |
| 12963  | Cryba3 | 0.23  | 1.02  | 1.73  | 0.96  | 1.47  | 0.4947 | 0.0876 | 0.0008 | 0.0000 crystallin, beta B3                                  |
| 12964  | Cryga  | -0.03 | 0.02  | -0.06 | 0.12  | -0.01 | 0.5192 | 0.5562 | 0.3123 | 0.4542 crystallin, gamma A                                  |
| 12966  | Crygc  | -0.05 | 0.00  | 0.00  | -0.08 | -0.05 | 0.6401 | 0.5951 | 0.5569 | 0.2866 crystallin, gamma C                                  |
| 12967  | Crygd  | -0.08 | 0.01  | 0.02  | -0.01 | -0.04 | 0.5413 | 0.5743 | 0.1854 | 0.3956 crystallin, gamma C                                  |
| 12968  | Cryge  | 0.30  | -0.08 | 0.03  | 0.12  | -0.01 | 0.4310 | 0.3325 | 0.1957 | 0.4647 crystallin, gamma D                                  |
| 12968  | Cryge  | -0.05 | 0.03  | 0.03  | -0.06 | 0.01  | 0.5553 | 0.6160 | 0.3262 | 0.4679 crystallin, gamma E                                  |
| 12969  | Crygf  | -0.01 | 0.11  | 0.05  | -0.05 | 0.00  | 0.6761 | 0.4495 | 0.4049 | 0.4842 crystallin, gamma E                                  |
| 214301 | Crygn  | 0.16  | -0.02 | 0.03  | 0.07  | 0.03  | 0.4622 | 0.3963 | 0.4802 | 0.3898 crystallin, gamma F                                  |
| 12970  | Crygs  | 0.13  | 0.30  | 0.19  | 0.13  | 0.18  | 0.3817 | 0.1389 | 0.3563 | 0.0211 crystallin, gamma N                                  |
| 68631  | CryY1  | 0.01  | -0.01 | 0.01  | -0.14 | -0.02 | 0.6742 | 0.5311 | 0.5515 | 0.4329 crystallin, gamma S                                  |
| 68631  | CryY1  | 0.57  | -0.30 | -0.43 | 0.14  | -0.03 | 0.1284 | 0.1025 | 0.2776 | 0.4195 crystallin, lambda 1                                 |
| 12971  | Crym   | -0.23 | -0.38 | -0.41 | -0.57 | -0.71 | 0.1962 | 0.0284 | 0.0112 | 0.0001 crystallin, lambda 1                                 |
| 12971  | Crym   | -0.19 | -0.60 | -0.19 | -0.42 | -0.42 | 0.0050 | 0.0488 | 0.108  | 0.0024 crystallin, lambda 1                                 |
| 12972  | Cryz   | 1.26  | -0.41 | -0.60 | -0.19 | -0.42 | 0.4478 | 0.1968 | 0.0687 | 0.0165 crystallin, mu                                       |
| 66609  | CryZ1  | -0.02 | 0.03  | 0.02  | -0.04 | -0.06 | 0.6500 | 0.6295 | 0.3602 | 0.2798 crystallin, zeta (quinone reductase)-like 1          |
| 66609  | CryZ1  | -0.05 | -0.20 | -0.86 | -0.70 | -0.86 | 0.6504 | 0.2350 | 0.0005 | 0.0006 crystallin, zeta (quinone reductase)-like 1          |
| 78617  | Csda   | -1.07 | 0.38  | -0.38 | -0.63 | -1.17 | 0.1167 | 0.1569 | 0.5862 | 0.0004 CSA-conditional, T cell activation-dependent protein |
| 12988  |        |       |       |       |       |       |        |        |        |                                                             |

|        |          |       |       |       |       |       |         |        |        |        |                                                                    |
|--------|----------|-------|-------|-------|-------|-------|---------|--------|--------|--------|--------------------------------------------------------------------|
| 239420 | Csmcd3   | 0.03  | -0.08 | -0.07 | -0.02 | -0.08 | 0.6506  | 0.4548 | 0.4500 | 0.5237 | 0.2732 CUB and Sushi multiple domains 3                            |
| 164333 | Cuzd1    | -0.05 | 0.09  | 0.15  | -0.03 | -0.05 | 0.6091  | 0.5157 | 0.2942 | 0.5038 | 0.3510 CUB and zona pellucida-like domains 1                       |
| 109332 | Cdcp1    | -0.40 | 0.42  | 0.69  | 0.04  | 0.34  | 0.2132  | 0.0247 | 0.0070 | 0.4819 | 0.0294 CUB domain containing protein 1                             |
| 109332 | Cdcp1    | -0.99 | 4.33  | 2.92  | -1.20 | -1.38 | 0.4736  | 0.0126 | 0.0540 | 0.2429 | 0.1247 CUB domain containing protein 1                             |
| 109332 | Cdcp1    | 0.06  | 0.01  | 0.63  | 0.32  | 0.92  | 0.6501  | 0.5259 | 0.2105 | 0.1961 | 0.0004 CUB domain containing protein 1                             |
| 242603 | Cdcp2    | -0.03 | -0.02 | 0.01  | 0.00  | -0.07 | 0.6041  | 0.5386 | 0.6122 | 0.5520 | 0.2112 CUB domain containing protein 2                             |
| 65869  | Cubn     | -0.03 | -0.03 | -0.20 | 0.01  | -0.06 | 0.6549  | 0.6499 | 0.6074 | 0.5455 | 0.3497 cubilin (intrinsic factor-cobalamin receptor)               |
| 103941 | Cuedc1   | 1.12  | 0.26  | 0.10  | 0.06  | -0.04 | 0.0853  | 0.6550 | 0.6039 | 0.4501 | 0.3979 CUE domain containing 1                                     |
| 103941 | Cuedc1   | 0.90  | 0.49  | 0.25  | -0.63 | -0.88 | 0.1267  | 0.2922 | 0.5112 | 0.0924 | 0.0042 CUE domain containing 1                                     |
| 67116  | Cuedc2   | -0.33 | -0.06 | -0.37 | -0.53 | -0.87 | 0.2902  | 0.5167 | 0.0800 | 0.0072 | 0.0001 CUE domain containing 2                                     |
| 67116  | Cuedc2   | -0.05 | -0.04 | -0.14 | -0.14 | -0.26 | 0.6586  | 0.3724 | 0.2512 | 0.3151 | 0.0867 CUE domain containing 2                                     |
| 13046  | Cugbp1   | 0.31  | 0.45  | 0.56  | 0.60  | 0.79  | 0.1367  | 0.0340 | 0.0072 | 0.0001 | 0.0000 CUG triplet repeat, RNA binding protein 1                   |
| 13046  | Cugbp1   | -0.39 | 0.20  | -0.19 | -0.46 | -0.89 | 0.3647  | 0.2941 | 0.6320 | 0.1058 | 0.0011 CUG triplet repeat, RNA binding protein 1                   |
| 13046  | Cugbp1   | -0.16 | -0.09 | -0.18 | -0.30 | -0.30 | 0.44515 | 0.4462 | 0.5073 | 0.0797 | 0.0967 CUG triplet repeat, RNA binding protein 1                   |
| 14007  | Cugbp2   | -0.45 | 0.06  | 0.20  | -0.24 | -0.22 | 0.2977  | 0.3464 | 0.2827 | 0.2681 | 0.1808 CUG triplet repeat, RNA binding protein 2                   |
| 14007  | Cugbp2   | -0.21 | 0.16  | -0.01 | -0.10 | -0.16 | 0.3169  | 0.3454 | 0.6308 | 0.3337 | 0.1338 CUG triplet repeat, RNA binding protein 2                   |
| 14007  | Cugbp2   | -0.55 | 0.02  | -0.01 | -0.11 | -0.16 | 0.3189  | 0.4017 | 0.4128 | 0.2983 | 0.1632 CUG triplet repeat, RNA binding protein 2                   |
| 14007  | Cugbp2   | 0.08  | -0.14 | -0.32 | 0.25  | 0.29  | 0.5302  | 0.4231 | 0.1321 | 0.0149 | 0.0115 CUG triplet repeat, RNA binding protein 2                   |
| 14007  | Cugbp2   | 0.06  | -0.21 | 0.15  | 0.56  | 0.82  | 0.6644  | 0.6425 | 0.3662 | 0.0090 | 0.0015 CUG triplet repeat, RNA binding protein 2                   |
| 26865  | Cul1     | 0.57  | -0.05 | 0.53  | 0.77  | 1.31  | 0.3740  | 0.4893 | 0.4563 | 0.0537 | 0.0010 culin 1                                                     |
| 26865  | Cul1     | 0.26  | -0.02 | 0.48  | 0.63  | 1.06  | 0.4349  | 0.6262 | 0.2030 | 0.0430 | 0.0008 culin 1                                                     |
| 26865  | Cul1     | 0.10  | 0.84  | 0.18  | 0.02  | 0.43  | 0.5244  | 0.3923 | 0.5140 | 0.4941 | 0.0011 culin 1                                                     |
| 71745  | Cul2     | 0.24  | -0.13 | -0.11 | 0.14  | 0.30  | 0.2815  | 0.2944 | 0.5156 | 0.2881 | 0.0588 culin 2                                                     |
| 71745  | Cul2     | 0.09  | 0.23  | 0.41  | 0.44  | 0.51  | 0.5768  | 0.3524 | 0.0839 | 0.0384 | 0.0037 culin 2                                                     |
| 26554  | Cul3     | -0.21 | -0.18 | 0.50  | 0.43  | 0.76  | 0.6290  | 0.4992 | 0.1702 | 0.0369 | 0.0047 culin 3                                                     |
| 26554  | Cul3     | 0.07  | -0.16 | 0.70  | 0.82  | 1.39  | 0.6767  | 0.5310 | 0.1075 | 0.0026 | 0.0001 culin 3                                                     |
| 99375  | CuH4a    | -0.08 | 0.08  | 0.06  | -0.09 | 0.00  | 0.5405  | 0.4126 | 0.4008 | 0.2962 | 0.4937 culin 4A                                                    |
| 99375  | CuH4a    | -0.02 | 0.06  | 0.13  | 0.12  | 0.08  | 0.5461  | 0.5234 | 0.4243 | 0.3104 | 0.3674 culin 4A                                                    |
| 99375  | CuH4a    | 0.05  | -0.08 | 0.06  | 0.13  | 0.25  | 0.6448  | 0.5127 | 0.3974 | 0.1338 | 0.0174 culin 4A                                                    |
| 72584  | CuH4b    | 0.31  | -0.67 | -1.08 | -0.59 | -0.91 | 0.3906  | 0.0342 | 0.0025 | 0.0162 | 0.0001 culin 4B                                                    |
| 72584  | CuH4b    | -0.15 | 0.85  | 0.85  | 0.62  | 1.18  | 0.6075  | 0.1176 | 0.0230 | 0.0044 | 0.0000 culin 4B                                                    |
| 75717  | CuH5     | -0.25 | -0.28 | -0.31 | -0.45 | -0.41 | 0.5084  | 0.5524 | 0.5052 | 0.0234 | 0.0097 culin 5                                                     |
| 75717  | CuH5     | 0.06  | -0.32 | -0.67 | -0.29 | -0.51 | 0.5942  | 0.0603 | 0.0039 | 0.0166 | 0.0042 culin 5                                                     |
| 75717  | CuH5     | -0.05 | 0.36  | 0.25  | -0.06 | 0.06  | 0.6238  | 0.1672 | 0.3586 | 0.3672 | 0.3121 culin 5                                                     |
| 75717  | CuH5     | -0.04 | 0.06  | -0.65 | -0.53 | -0.71 | 0.6764  | 0.4918 | 0.1362 | 0.0876 | 0.0114 culin 5                                                     |
| 66515  | Cul7     | -1.31 | 0.57  | 0.22  | -0.36 | -0.92 | 0.2173  | 0.1700 | 0.2971 | 0.1663 | 0.0066 culin 7                                                     |
| 66515  | Cul7     | 0.04  | 0.01  | 0.00  | 0.09  | 0.02  | 0.5599  | 0.6550 | 0.5976 | 0.2435 | 0.4068 culin 7                                                     |
| 66515  | Cul7     | 0.03  | -0.05 | -0.03 | 0.03  | -0.04 | 0.6368  | 0.5600 | 0.6167 | 0.4627 | 0.3673 culin 7                                                     |
| 71902  | Cand1    | -0.22 | -0.01 | -0.87 | -0.50 | -0.12 | 0.4792  | 0.5731 | 0.0465 | 0.0418 | 0.0001 culin associated and neddylation disassociated 1            |
| 71902  | Cand1    | 0.08  | 0.25  | 0.43  | 0.03  | 0.32  | 0.6009  | 0.5217 | 0.2125 | 0.5104 | 0.0082 culin associated and neddylation disassociated 1            |
| 71902  | Cand1    | -0.03 | -0.26 | -0.25 | -0.24 | -0.29 | 0.6674  | 0.4311 | 0.4471 | 0.0151 | 0.0016 culin associated and neddylation disassociated 1            |
| 67088  | Cand2    | 0.07  | 0.09  | 0.02  | 0.14  | -0.03 | 0.6003  | 0.6408 | 0.5197 | 0.1618 | 0.3951 culin-associated and neddylation-disassociated 2 (putative) |
| 67088  | Cand2    | -0.04 | -0.11 | -0.05 | 0.09  | -0.08 | 0.6379  | 0.6391 | 0.5689 | 0.4084 | 0.2933 culin-associated and neddylation-disassociated 2 (putative) |
| 67675  | CuIla    | -0.46 | 0.14  | -0.23 | -0.81 | -1.22 | 0.3411  | 0.6212 | 0.2636 | 0.0080 | 0.0005 cuIla divalent cation tolerance homolog (E. coli)           |
| 66388  | CuIc     | 0.13  | -0.35 | -0.47 | -0.27 | -0.28 | 0.4140  | 0.0235 | 0.0064 | 0.0273 | 0.0119 cutC copper transporter homolog (E. coli)                   |
| 66388  | CuIc     | -0.15 | -0.55 | -0.76 | -0.56 | -0.69 | 0.5434  | 0.2242 | 0.0547 | 0.0043 | 0.0000 cutC copper transporter homolog (E. coli)                   |
| 13047  | Cux1     | 0.34  | -0.10 | 0.33  | 0.53  | 0.75  | 0.2714  | 0.4493 | 0.1724 | 0.0422 | 0.0010 cut-like homeobox 1                                         |
| 13047  | Cux1     | 0.21  | -0.08 | 0.03  | 0.12  | 0.10  | 0.3189  | 0.2710 | 0.5241 | 0.1458 | 0.1789 cut-like homeobox 1                                         |
| 13047  | Cux1     | -0.12 | 0.38  | 0.49  | 0.15  | 0.34  | 0.5592  | 0.3420 | 0.1934 | 0.1505 | 0.0239 cut-like homeobox 1                                         |
| 13047  | Cux1     | -0.05 | 0.01  | -0.10 | -0.18 | -0.10 | 0.6556  | 0.4647 | 0.2705 | 0.2451 | 0.2953 cut-like homeobox 1                                         |
| 13048  | Cux2     | -0.57 | 0.61  | -0.06 | -0.17 | -0.21 | 0.4490  | 0.1377 | 0.5682 | 0.2287 | 0.1046 cut-like homeobox 2                                         |
| 66070  | Cwc15    | -0.18 | 0.12  | 0.38  | 0.12  | 0.06  | 0.3283  | 0.0964 | 0.1752 | 0.3168 | 0.3790 CWC15 homolog (S. cerevisiae)                               |
| 66070  | Cwc15    | 0.18  | 0.12  | 0.11  | -0.08 | 0.26  | 0.5133  | 0.5902 | 0.6018 | 0.4515 | 0.1942 CWC15 homolog (S. cerevisiae)                               |
| 72502  | CwF191   | -0.50 | 0.12  | 0.10  | 0.07  | 0.27  | 0.5256  | 0.3464 | 0.3495 | 0.4715 | 0.0663 CWC15 homolog (S. cerevisiae)                               |
| 72502  | CwF191   | -0.11 | 0.37  | 0.14  | 0.05  | 0.14  | 0.4787  | 0.0548 | 0.1893 | 0.4200 | 0.1246 CWF19-like 1, cell cycle control (S. pombe)                 |
| 72502  | CwF191   | -0.08 | 0.07  | 0.08  | 0.02  | 0.09  | 0.5523  | 0.3811 | 0.3220 | 0.5295 | 0.2746 CWF19-like 1, cell cycle control (S. pombe)                 |
| 72502  | CwF191   | -0.08 | -0.04 | -0.38 | -0.66 | -0.78 | 0.5985  | 0.4131 | 0.0611 | 0.0310 | 0.0671 CWF19-like 2, cell cycle control (S. pombe)                 |
| 244672 | CwF192   | -0.68 | -0.04 | -0.28 | -0.62 | -0.42 | 0.3149  | 0.4623 | 0.6161 | 0.3122 | 0.4046 CWF19-like 2, cell cycle control (S. pombe)                 |
| 244672 | CwF192   | -0.17 | 0.44  | 0.28  | -0.10 | -0.05 | 0.4405  | 0.0577 | 0.1389 | 0.3817 | 0.2172 CWF19-like 2, cell cycle control (S. pombe)                 |
| 244672 | CwF192   | 0.24  | -0.07 | -0.03 | -0.22 | 0.09  | 0.4478  | 0.3817 | 0.3487 | 0.0607 | 0.1309 CWF19-like 2, cell cycle control (S. pombe)                 |
| 244672 | CwF192   | -0.10 | 0.51  | 0.45  | 0.03  | 0.29  | 0.5547  | 0.0280 | 0.0130 | 0.5289 | 0.0020 CXXC finger 1 (PHD domain)                                  |
| 74322  | Cxxc1    | 0.36  | -0.60 | 0.24  | 0.57  | 1.07  | 0.4127  | 0.1691 | 0.4987 | 0.1142 | 0.3480 CXXC finger 4                                               |
| 319478 | Cxxc4    | -0.07 | 0.04  | -0.04 | -0.04 | -0.03 | 0.4611  | 0.4659 | 0.5667 | 0.4304 | 0.4197 CXXC finger 4                                               |
| 319478 | Cxxc4    | 0.04  | -0.02 | -0.04 | -0.02 | 0.02  | 0.6124  | 0.4623 | 0.3780 | 0.4888 | 0.3126 CXXC finger 5                                               |
| 67393  | Cxxc5    | -0.24 | 0.45  | 0.02  | -0.17 | -0.12 | 0.4221  | 0.1911 | 0.5033 | 0.2328 | 0.0618 CXXC finger 5                                               |
| 67393  | Cxxc5    | -0.02 | -0.17 | -0.14 | -0.33 | -0.32 | 0.6843  | 0.3359 | 0.3516 | 0.0854 | 0.3952 cyclic AMP-regulated phosphoprotein, 21                     |
| 4100   | Arp21    | -0.06 | -0.08 | -0.03 | 0.05  | -0.04 | 0.5834  | 0.4997 | 0.5985 | 0.4813 | 0.2307 cyclic AMP-regulated phosphoprotein, 21                     |
| 74100  | Arp21    | -0.03 | -0.13 | -0.08 | -0.05 | -0.09 | 0.6529  | 0.3642 | 0.5211 | 0.4052 | 0.1821 cyclic AMP-regulated phosphoprotein, 21                     |
| 74100  | Arp21    | -0.01 | 0.02  | 0.01  | 0.00  | 0.08  | 0.6777  | 0.6003 | 0.6050 | 0.5632 | 0.0128 cyclic nucleotide gated channel alpha 1                     |
| 12788  | Cnga1    | -0.06 | -0.08 | -0.08 | -0.13 | -0.11 | 0.5825  | 0.6507 | 0.5713 | 0.0132 | 0.0013 cyclic nucleotide gated channel alpha 2                     |
| 12789  | Cnga2    | 0.32  | 0.32  | 0.32  | 0.51  | 0.65  | 0.5932  | 0.5896 | 0.5713 | 0.1818 | 0.3104 cyclic nucleotide gated channel alpha 3                     |
| 12790  | Cnga3    | 0.11  | 0.13  | 0.02  | 0.02  | -0.05 | 0.4908  | 0.3828 | 0.3918 | 0.5091 | 0.4127 cyclic nucleotide gated channel beta 1                      |
| 333329 | Cngb1    | 0.06  | -0.13 | -0.05 | 0.07  | 0.03  | 0.5533  | 0.3454 | 0.5496 | 0.3344 | 0.3571 cyclic nucleotide gated channel beta 3                      |
| 30952  | Cngb3    | 0.04  | -0.08 | -0.27 | 0.01  | 0.04  | 0.5496  | 0.2681 | 0.2911 | 0.5386 | 0.4072 cyclin A1                                                   |
| 30952  | Cngb3    | -0.01 | 0.15  | -0.11 | 0.01  | 0.01  | 0.6617  | 0.6072 | 0.6128 | 0.5114 | 0.1956 cyclin A2                                                   |
| 12428  | Cnna1    | 0.06  | -0.15 | -0.11 | 0.01  | 0.03  | 0.6219  | 0.3434 | 0.3915 | 0.5114 | 0.0274 cyclin B1                                                   |
| 12428  | Cnna2    | 0.03  | 0.04  | 0.63  | -0.06 | 0.22  | 0.2231  | 0.0715 | 0.3559 | 0.3505 | 0.1636 cyclin B1                                                   |
| 268697 | Cnna2    | -0.17 | 0.05  | 0.17  | 0.05  | 0.15  | 0.6548  | 0.3225 | 0.4663 | 0.4965 | 0.0507 cyclin B1                                                   |
| 268697 | Cnna2    | 0.04  | 0.06  | 0.10  | 0.07  | 0.05  | 0.6219  | 0.3434 | 0.3915 | 0.5114 | 0.0500 cyclin B1 interacting protein 1                             |
| 268697 | Cnna2    | -0.03 | -0.17 | 0.05  | -0.03 | 0.14  | 0.6591  | 0.5274 | 0.3478 | 0.1282 | 0.3668 cyclin B2                                                   |
| 239083 | Cenb1p1  | 0.04  | -0.16 | 0.14  | 0.15  | 0.34  | 0.6074  | 0.3048 | 0.4462 | 0.2818 | 0.1658 cyclin B2, pseudogene                                       |
| 12442  | Cenb2    | -0.36 | -0.16 | 0.44  | 0.10  | 0.13  | 0.5615  | 0.5003 | 0.3203 | 0.0659 | 0.1658 cyclin B3                                                   |
| 594536 | Cenb2-ps | -0.14 | -0.25 | -0.23 | -0.09 | -0.10 | 0.3203  | 0.0659 | 0.0597 | 0.2582 | 0.1275 cyclin B                                                    |

|        |        |       |       |       |       |       |        |        |        |                 |                                                                                  |
|--------|--------|-------|-------|-------|-------|-------|--------|--------|--------|-----------------|----------------------------------------------------------------------------------|
| 12443  | Cand1  | -0.46 | 0.20  | -0.19 | -0.17 | -0.38 | 0.3257 | 0.5091 | 0.3529 | 0.3692          | 0.0917 cyclin D1                                                                 |
| 12443  | Cand1  | -0.37 | 0.10  | -0.22 | -0.09 | -0.25 | 0.3465 | 0.5341 | 0.2177 | 0.4616          | 0.2143 cyclin D1                                                                 |
| 12443  | Cand1  | -0.21 | 0.21  | -0.22 | -0.19 | -0.15 | 0.4982 | 0.5821 | 0.2763 | 0.2859          | 0.2767 cyclin D1                                                                 |
| 12443  | Cand1  | -0.23 | 0.30  | 0.00  | -0.03 | -0.05 | 0.5221 | 0.5786 | 0.4795 | 0.5268          | 0.4209 cyclin D1                                                                 |
| 12443  | Cand1  | -0.20 | 0.25  | -0.17 | -0.05 | 0.01  | 0.5429 | 0.5996 | 0.3052 | 0.5079          | 0.4798 cyclin D1                                                                 |
| 12443  | Cand1  | -0.15 | 0.06  | -0.28 | -0.05 | 0.33  | 0.5875 | 0.5634 | 0.1548 | 0.4715          | 0.1434 cyclin D1                                                                 |
| 12443  | Cand1  | -0.11 | -0.13 | -0.14 | -0.13 | -0.32 | 0.6144 | 0.3574 | 0.0646 | 0.4338          | 0.1491 cyclin D1                                                                 |
| 12444  | Cand2  | -0.83 | -0.14 | -1.08 | -0.54 | -0.77 | 0.1156 | 0.3732 | 0.0115 | 0.0852          | 0.0199 cyclin D2                                                                 |
| 12444  | Cand2  | -0.62 | -0.10 | -0.58 | 0.10  | 0.04  | 0.6316 | 0.3223 | 0.1981 | 0.4025          | 0.4278 cyclin D2                                                                 |
| 12444  | Cand2  | -0.57 | -0.07 | -0.55 | -0.07 | -0.22 | 0.6383 | 0.0684 | 0.0532 | 0.4915          | 0.1522 cyclin D2                                                                 |
| 12445  | Cand3  | -0.35 | 0.24  | 0.14  | -0.23 | -0.58 | 0.3655 | 0.6031 | 0.6075 | 0.2074          | 0.0579 cyclin D3                                                                 |
| 12445  | Cand3  | -0.45 | -0.35 | -0.46 | -0.23 | -0.34 | 0.5498 | 0.5529 | 0.5826 | 0.1328          | 0.0748 cyclin D-type binding-protein 1                                           |
| 17151  | Cane1  | 0.22  | -0.12 | -0.18 | -0.08 | -0.08 | 0.4322 | 0.2524 | 0.1463 | 0.3754          | 0.2631 cyclin E1                                                                 |
| 12447  | Cane1  | 0.05  | -0.26 | -0.24 | -0.27 | -0.26 | 0.6585 | 0.2329 | 0.1726 | 0.0736          | 0.0391 cyclin E1                                                                 |
| 12448  | Cane2  | 0.08  | -0.16 | -0.14 | -0.16 | -0.05 | 0.5387 | 0.2599 | 0.3172 | 0.1567          | 0.2770 cyclin E2                                                                 |
| 12448  | Cane2  | 0.01  | -0.02 | 0.00  | -0.04 | -0.05 | 0.6856 | 0.6120 | 0.6389 | 0.4250          | 0.3047 cyclin E2                                                                 |
| 12449  | Cenf   | 0.05  | 0.01  | 0.14  | 0.05  | 0.18  | 0.6420 | 0.5385 | 0.5491 | 0.4269          | 0.0807 cyclin F                                                                  |
| 231580 | Gak    | 0.25  | 0.00  | 0.29  | 0.42  | 0.81  | 0.5894 | 0.2437 | 0.0275 | 0.0275          | 0.0003 cyclin G associated kinase                                                |
| 231580 | Gak    | 0.01  | 0.04  | 0.00  | 0.00  | 0.06  | 0.3608 | 0.5894 | 0.5581 | 0.5581          | 0.2725 cyclin G associated kinase                                                |
| 12450  | Ceng1  | 0.48  | -0.80 | -0.59 | -0.09 | -0.31 | 0.6909 | 0.6536 | 0.0111 | 0.3799          | 0.0864 cyclin G1                                                                 |
| 12450  | Ceng1  | 0.34  | -0.03 | -0.27 | -0.28 | -0.49 | 0.1649 | 0.0059 | 0.0599 | 0.1111          | 0.0221 cyclin G1                                                                 |
| 12452  | Ceng2  | -0.15 | -1.10 | -0.88 | -0.64 | -0.24 | 0.4449 | 0.4337 | 0.1726 | 0.1523          | 0.1639 cyclin G2                                                                 |
| 66671  | Cenh   | 0.27  | -0.59 | -0.78 | -0.28 | -0.45 | 0.3485 | 0.0135 | 0.0011 | 0.0084          | 0.1639 cyclin G2                                                                 |
| 66671  | Cenh   | 0.17  | -0.10 | -0.17 | -0.08 | 0.08  | 0.4087 | 0.2495 | 0.1909 | 0.4056          | 0.0083 cyclin H                                                                  |
| 66671  | Cenh   | 0.22  | -0.34 | -0.80 | -0.54 | -0.81 | 0.1540 | 0.0085 | 0.0023 | 0.0001 cyclin H |                                                                                  |
| 66671  | Cenh   | 0.00  | -0.06 | -0.16 | -0.25 | -0.34 | 0.7025 | 0.4319 | 0.2006 | 0.0464          | 0.0257 cyclin H                                                                  |
| 12453  | Cenl   | 0.88  | -0.32 | -0.24 | 0.46  | 0.66  | 0.0416 | 0.2334 | 0.1629 | 0.0107          | 0.0009 cyclin I                                                                  |
| 12453  | Cenl   | 0.35  | 0.35  | 0.07  | 0.16  | 0.21  | 0.3403 | 0.1317 | 0.5632 | 0.2896          | 0.1328 cyclin I                                                                  |
| 12453  | Cenl   | 0.34  | -0.36 | -0.27 | 0.07  | 0.52  | 0.4176 | 0.2273 | 0.4934 | 0.4920          | 0.0198 cyclin I                                                                  |
| 12453  | Cenl   | 0.26  | 0.53  | -0.27 | -0.31 | -0.31 | 0.4782 | 0.3106 | 0.2125 | 0.1532          | 0.1481 cyclin I                                                                  |
| 240665 | Cenj   | -0.56 | -0.08 | -0.15 | -0.66 | -0.47 | 0.2563 | 0.5243 | 0.5934 | 0.0097          | 0.0181 cyclin J                                                                  |
| 300894 | Cenj   | 0.03  | 0.51  | 1.42  | 1.14  | 1.33  | 0.6793 | 0.0608 | 0.0008 | 0.0000          | 0.0001 cyclin J-like                                                             |
| 12454  | Cenk   | 0.05  | -0.10 | 0.20  | 0.06  | -0.09 | 0.6316 | 0.3319 | 0.5122 | 0.4501          | 0.2422 cyclin K                                                                  |
| 56706  | Cenl   | -0.02 | 0.11  | 0.07  | -0.09 | 0.02  | 0.6765 | 0.5075 | 0.5809 | 0.2955          | 0.4499 cyclin K                                                                  |
| 56706  | Cenl   | -0.33 | 0.63  | 1.15  | 0.93  | 1.14  | 0.4211 | 0.2842 | 0.0328 | 0.0013          | 0.0004 cyclin L1                                                                 |
| 56706  | Cenl   | -0.33 | 1.50  | 1.38  | 0.11  | 0.39  | 0.4660 | 0.0323 | 0.0154 | 0.4344          | 0.0436 cyclin L1                                                                 |
| 56706  | Cenl   | -0.14 | 0.41  | 0.01  | -0.62 | -0.44 | 0.6260 | 0.4868 | 0.5385 | 0.0879          | 0.0788 cyclin L1                                                                 |
| 56036  | Cenl   | 0.15  | -0.10 | 0.27  | 0.25  | 0.52  | 0.3586 | 0.4013 | 0.2948 | 0.1015          | 0.0019 cyclin L2                                                                 |
| 56036  | Cenl   | -0.34 | -0.05 | 0.45  | 0.42  | 0.80  | 0.5264 | 0.4729 | 0.1547 | 0.0190          | 0.0008 cyclin L2                                                                 |
| 83674  | Gnm1   | 0.09  | -0.16 | 0.11  | 0.16  | 0.33  | 0.6108 | 0.2614 | 0.6151 | 0.3068          | 0.1137 cyclin L2                                                                 |
| 93674  | Gnm1   | -0.04 | -0.02 | -0.05 | -0.09 | -0.12 | 0.6334 | 0.6410 | 0.4765 | 0.4019          | 0.2633 cyclin M1                                                                 |
| 94219  | Gnm2   | 0.29  | -0.19 | -0.11 | -0.19 | -0.22 | 0.6335 | 0.4524 | 0.3731 | 0.3062          | 0.1624 cyclin M1                                                                 |
| 94218  | Gnm3   | 0.05  | 0.08  | 0.15  | 0.03  | 0.14  | 0.5904 | 0.4978 | 0.3890 | 0.0774          | 0.0441 cyclin M2                                                                 |
| 94218  | Gnm3   | 0.04  | -0.13 | -0.26 | -0.30 | -0.34 | 0.6437 | 0.2731 | 0.0390 | 0.0372          | 0.1369 cyclin M3                                                                 |
| 94218  | Gnm3   | 0.02  | 0.05  | 0.06  | 0.10  | 0.09  | 0.6721 | 0.4941 | 0.3700 | 0.2512          | 0.3101 cyclin M3                                                                 |
| 94220  | Gnm4   | -0.21 | 0.09  | 0.06  | -0.21 | -0.13 | 0.3106 | 0.6503 | 0.5878 | 0.0298          | 0.1303 cyclin M4                                                                 |
| 94220  | Gnm4   | -0.22 | -0.13 | -0.32 | -0.37 | -0.43 | 0.3708 | 0.3446 | 0.0560 | 0.0317          | 0.0139 cyclin M4                                                                 |
| 8107   | Cntd1  | -0.06 | 0.05  | 0.04  | -0.03 | -0.43 | 0.5154 | 0.5775 | 0.5982 | 0.4492          | 0.2091 cyclin N-terminal domain containing 1                                     |
| 216630 | Cnto   | -0.26 | 0.21  | 0.13  | 0.05  | 0.29  | 0.5171 | 0.6143 | 0.6288 | 0.5057          | 0.0900 cyclin O                                                                  |
| 12455  | Cenl1  | -0.51 | 0.06  | 0.13  | -0.21 | -0.13 | 0.0296 | 0.4399 | 0.1126 | 0.1044          | 0.1765 cyclin T1                                                                 |
| 12455  | Cenl1  | 0.05  | 0.10  | 0.31  | 0.34  | 0.43  | 0.6496 | 0.5910 | 0.4125 | 0.0488          | 0.0033 cyclin T1                                                                 |
| 72949  | Cenl2  | 0.37  | -0.45 | -0.08 | -0.05 | 0.05  | 0.2313 | 0.0164 | 0.0360 | 0.4084          | 0.4243 cyclin T2                                                                 |
| 72949  | Cenl2  | -0.41 | -0.48 | -0.47 | -0.41 | -0.33 | 0.4099 | 0.5323 | 0.5262 | 0.0031          | 0.0059 cyclin T2                                                                 |
| 72949  | Cenl2  | 0.06  | 0.11  | 0.54  | 0.30  | 0.64  | 0.5806 | 0.4213 | 0.0022 | 0.0148          | 0.0002 cyclin T2                                                                 |
| 67974  | Cenl2  | 0.36  | -0.33 | 0.27  | 0.49  | 0.78  | 0.3139 | 0.1525 | 0.4553 | 0.0894          | 0.0002 cyclin Y                                                                  |
| 67974  | Cenl2  | -0.73 | -0.25 | -0.14 | -0.27 | -0.51 | 0.4367 | 0.5190 | 0.4543 | 0.0859          | 0.0098 cyclin Y                                                                  |
| 227210 | Cenyl1 | 0.24  | -0.01 | 0.27  | 0.26  | 0.51  | 0.2560 | 0.5519 | 0.2389 | 0.0399          | 0.0002 cyclin Y-like 1                                                           |
| 227210 | Cenyl1 | 0.85  | 0.07  | -0.57 | -0.57 | -1.09 | 0.1266 | 0.0678 | 0.5073 | 0.0720          | 0.0028 cyclin-dependent kinase (CDC2-like) 10                                    |
| 234854 | Cdk10  | -1.00 | 0.59  | 0.00  | -0.58 | -0.99 | 0.2129 | 0.1787 | 0.3963 | 0.0663          | 0.0024 cyclin-dependent kinase (CDC2-like) 10                                    |
| 234854 | Cdk10  | -1.40 | 0.09  | 0.00  | -0.58 | -0.99 | 0.2129 | 0.1787 | 0.3963 | 0.0663          | 0.4713 cyclin-dependent kinase 2                                                 |
| 12566  | Cdk2   | 0.07  | -0.01 | 0.03  | -0.05 | 0.01  | 0.5186 | 0.4729 | 0.5888 | 0.3453          | 0.0937 cyclin-dependent kinase 2                                                 |
| 12566  | Cdk2   | 0.03  | 0.03  | 0.03  | 0.04  | 0.15  | 0.6290 | 0.5984 | 0.5459 | 0.4602          | 0.0937 cyclin-dependent kinase 3                                                 |
| 69681  | Cdk3   | -0.03 | 0.25  | 0.11  | 0.06  | 0.08  | 0.6777 | 0.5984 | 0.5877 | 0.3086          | 0.2264 cyclin-dependent kinase 3                                                 |
| 12567  | Cdk4   | -0.12 | -0.32 | -0.02 | -0.10 | -0.43 | 0.5495 | 0.0833 | 0.5020 | 0.4206          | 0.0970 cyclin-dependent kinase 4                                                 |
| 12567  | Cdk4   | -0.20 | -0.21 | -0.31 | -0.18 | -0.43 | 0.2141 | 0.1592 | 0.0122 | 0.1316          | 0.0081 cyclin-dependent kinase 4                                                 |
| 12569  | Cdk5/1 | -0.32 | 0.25  | 0.39  | -0.11 | 0.17  | 0.3020 | 0.1009 | 0.0306 | 0.3683          | 0.2096 cyclin-dependent kinase 5                                                 |
| 12570  | Cdk5/2 | -0.72 | -0.18 | 0.49  | -0.35 | -0.54 | 0.1557 | 0.2801 | 0.4281 | 0.2585          | 0.1208 cyclin-dependent kinase 5, regulatory subunit 1 (p35) 1                   |
| 12571  | Cdk6   | -0.44 | -0.06 | -0.26 | -0.56 | -0.60 | 0.1370 | 0.6107 | 0.1452 | 0.0029          | 0.0007 cyclin-dependent kinase 5, regulatory subunit 2 (p39)                     |
| 12571  | Cdk6   | -0.49 | 0.18  | 0.25  | -0.20 | -0.24 | 0.1859 | 0.4393 | 0.2057 | 0.2452          | 0.0207 cyclin-dependent kinase 6                                                 |
| 12571  | Cdk6   | -0.03 | 0.01  | 0.04  | -0.05 | 0.15  | 0.6433 | 0.4978 | 0.4495 | 0.4403          | 0.1719 cyclin-dependent kinase 6                                                 |
| 12572  | Cdk7   | 0.50  | -0.79 | -0.72 | -0.15 | 0.13  | 0.2797 | 0.0394 | 0.0146 | 0.3968          | 0.3460 cyclin-dependent kinase 7 (homolog of Xenopus MO15 cdk-activating kinase) |
| 12572  | Cdk7   | 0.06  | -0.04 | -0.04 | 0.03  | 0.05  | 0.5744 | 0.6207 | 0.6057 | 0.4863          | 0.3768 cyclin-dependent kinase 7 (homolog of Xenopus MO15 cdk-activating kinase) |
| 12572  | Cdk7   | -0.04 | -0.16 | -0.11 | -0.17 | -0.12 | 0.6290 | 0.3875 | 0.5056 | 0.0751          | 0.1277 cyclin-dependent kinase 7 (homolog of Xenopus MO15 cdk-activating kinase) |
| 264064 | Cdk8   | -0.39 | 1.03  | 0.53  | -0.03 | 0.07  | 0.4481 | 0.1138 | 0.4313 | 0.2658          | 0.4208 cyclin-dependent kinase 8                                                 |
| 264064 | Cdk8   | 0.10  | 0.06  | 0.09  | 0.06  | 0.11  | 0.6692 | 0.6409 | 0.5684 | 0.4715          | 0.0046 cyclin-dependent kinase 8                                                 |
| 264064 | Cdk8   | -0.09 | -0.38 | 0.16  | 0.58  | 0.84  | 0.6698 | 0.6173 | 0.3249 | 0.4042          | 0.4708 cyclin-dependent kinase 9 (CDC2-related kinase)                           |
| 107951 | Cdk9   | -1.12 | 0.58  | 0.54  | -0.15 | -0.02 | 0.2768 | 0.1687 | 0.1530 | 0.4221          | 0.0000 cyclin-dependent kinase inhibitor 1A (p21)                                |
| 12575  | Cdk1a  | -0.47 | 3.46  | 4.21  | 3.42  | 3.77  | 0.3459 | 0.0001 | 0.0000 | 0.0000          | 0.0000 cyclin-dependent kinase inhibitor 1A (p21)                                |
| 12575  | Cdk1a  | -0.45 | 3.42  | 4.19  | 3.46  | 3.72  | 0.3640 | 0.0001 | 0.0000 | 0.0000          | 0.0000 cyclin-dependent kinase inhibitor 1A (p21)                                |
| 12575  | Cdk1a  | -0.43 | 3.82  | 4.20  | 3.47  | 3.72  | 0.3655 | 0.0001 | 0.0000 | 0.0000          | 0.0000 cyclin-dependent kinase inhibitor 1A (p21)                                |
| 12575  | Cdk1a  | 0.53  | 3.13  | 3.94  | 3.46  | 3.81  | 0.4618 | 0.0046 | 0.0009 | 0.0000          | 0.0000 cyclin-dependent kinase inhibitor 1A (p21)                                |
| 12575  | Cdk1a  | 0.50  | 3.16  | 3.82  | 3.39  | 3.76  | 0.4736 | 0.0040 | 0.0006 | 0.0000          | 0.0000 cyclin-dependent kinase inhibitor 1A (p21)                                |
| 12575  | Cdk1a  | 0.83  | 3.41  | 4.15  | 3.42  | 3.69  | 0.5203 | 0.0014 | 0.0003 | 0.0000          | 0.0000 cyclin-dependent kinase inhibitor 1A (p21)                                |
| 12575  | Cdk1a  | 0.27  | 3.38  | 3.98  | 3.38  | 3.73  | 0.5635 | 0.0016 | 0.0003 | 0.0000          | 0.0000 cyclin-dependent kinase inhibitor 1A (p21)                                |
| 12575  | Cdk1a  | 0.25  | 3.40  | 4.05  | 3.42  | 3.79  | 0.5802 | 0.0016 | 0.0003 | 0.0000          | 0.0000 cyclin-dependent kinase inhibitor 1A (p21)                                |
| 12575  | Cdk1a  | 0.27  | 3.45  | 4.13  | 3.41  | 3.86  | 0.5898 | 0.0029 | 0.0004 | 0.0000          | 0.0000 cyclin-dependent kinase inhibitor 1A (p21)                                |
| 12575  | Cdk1a  | -0.09 | 3.41  | 4.15  |       |       |        |        |        |                 |                                                                                  |

|        |         |       |       |       |       |       |        |        |        |        |                                                                                      |
|--------|---------|-------|-------|-------|-------|-------|--------|--------|--------|--------|--------------------------------------------------------------------------------------|
| 12576  | Cdkn1b  | 0.12  | 0.34  | 0.19  | -0.17 | 0.13  | 0.6188 | 0.5468 | 0.6379 | 0.2817 | 0.2487 cyclin-dependent kinase inhibitor 1B                                          |
| 12576  | Cdkn1b  | 0.08  | 0.23  | 0.08  | -0.33 | -0.08 | 0.6306 | 0.5638 | 0.6055 | 0.0123 | 0.3122 cyclin-dependent kinase inhibitor 1B                                          |
| 12576  | Cdkn1b  | 0.09  | 0.38  | 0.29  | -0.17 | 0.06  | 0.6343 | 0.5036 | 0.5698 | 0.1896 | 0.3431 cyclin-dependent kinase inhibitor 1B                                          |
| 12576  | Cdkn1b  | 0.09  | -0.13 | -0.48 | -0.13 | -0.14 | 0.6375 | 0.4128 | 0.4174 | 0.0179 | 0.3284 cyclin-dependent kinase inhibitor 1B                                          |
| 12576  | Cdkn1b  | -0.06 | 0.19  | 0.19  | -0.38 | -0.06 | 0.6506 | 0.5582 | 0.5437 | 0.0384 | 0.3657 cyclin-dependent kinase inhibitor 1B                                          |
| 12576  | Cdkn1b  | 0.04  | 0.29  | 0.16  | -0.31 | -0.04 | 0.6761 | 0.5199 | 0.6234 | 0.0286 | 0.3799 cyclin-dependent kinase inhibitor 1B                                          |
| 12576  | Cdkn1c  | 0.00  | -0.33 | -0.08 | -0.10 | -0.02 | 0.6885 | 0.4950 | 0.5704 | 0.1678 | 0.4115 cyclin-dependent kinase inhibitor 1B (P57)                                    |
| 12577  | Cdkn1c  | -0.40 | 0.33  | 0.56  | -0.48 | 0.15  | 0.3689 | 0.3779 | 0.1731 | 0.0678 | 0.3599 cyclin-dependent kinase inhibitor 1C (P57)                                    |
| 12578  | Cdkn2a  | 0.29  | 0.16  | -0.08 | 0.04  | 0.07  | 0.1037 | 0.2181 | 0.4488 | 0.4559 | 0.2614 cyclin-dependent kinase inhibitor 2A                                          |
| 12578  | Cdkn2a  | 0.15  | 0.15  | -0.05 | -0.06 | -0.04 | 0.3444 | 0.1926 | 0.6102 | 0.3717 | 0.3381 cyclin-dependent kinase inhibitor 2A                                          |
| 12578  | Cdkn2a  | 0.11  | 0.42  | 0.04  | 0.00  | -0.01 | 0.4518 | 0.0508 | 0.5618 | 0.5553 | 0.4489 cyclin-dependent kinase inhibitor 2A                                          |
| 12578  | Cdkn2a  | 0.11  | 0.21  | 0.02  | -0.04 | -0.07 | 0.4602 | 0.1425 | 0.4462 | 0.4159 | 0.2341 cyclin-dependent kinase inhibitor 2A                                          |
| 12578  | Cdkn2a  | 0.10  | 0.22  | 0.03  | -0.02 | -0.08 | 0.4776 | 0.0989 | 0.4709 | 0.5112 | 0.2959 cyclin-dependent kinase inhibitor 2A                                          |
| 12578  | Cdkn2a  | 0.09  | 0.30  | 0.20  | -0.07 | -0.01 | 0.5094 | 0.1607 | 0.3863 | 0.2964 | 0.4539 cyclin-dependent kinase inhibitor 2A                                          |
| 12578  | Cdkn2a  | 0.09  | 0.26  | -0.09 | -0.07 | -0.09 | 0.5127 | 0.1023 | 0.5337 | 0.2938 | 0.1470 cyclin-dependent kinase inhibitor 2A                                          |
| 12578  | Cdkn2a  | -0.24 | 0.27  | -0.04 | -0.19 | -0.13 | 0.5215 | 0.1930 | 0.4347 | 0.0820 | 0.1230 cyclin-dependent kinase inhibitor 2A                                          |
| 12578  | Cdkn2a  | 0.16  | 0.14  | -0.12 | -0.20 | -0.22 | 0.5480 | 0.5668 | 0.1824 | 0.3109 | 0.2298 cyclin-dependent kinase inhibitor 2A                                          |
| 12578  | Cdkn2a  | 0.07  | 0.31  | -0.01 | -0.04 | 0.01  | 0.5561 | 0.0697 | 0.6033 | 0.4385 | 0.4765 cyclin-dependent kinase inhibitor 2A                                          |
| 12578  | Cdkn2b  | 0.79  | 0.35  | 0.73  | 0.88  | 1.66  | 0.0737 | 0.3629 | 0.0532 | 0.0006 | 0.1129 cyclin-dependent kinase inhibitor 2B (p15, inhibits CDK4)                     |
| 12580  | Cdkn2c  | 1.22  | -0.93 | -1.06 | -0.03 | -0.24 | 0.0411 | 0.0927 | 0.0243 | 0.5025 | 0.1129 cyclin-dependent kinase inhibitor 2C (p18, inhibits CDK4)                     |
| 12580  | Cdkn2c  | 1.27  | -0.96 | -1.09 | 0.00  | -0.07 | 0.0474 | 0.0886 | 0.0309 | 0.5214 | 0.4028 cyclin-dependent kinase inhibitor 2C (p18, inhibits CDK4)                     |
| 12581  | Cdkn2d  | 0.83  | 1.36  | 1.61  | 0.68  | 0.93  | 0.2300 | 0.0800 | 0.0433 | 0.0094 | 0.0005 cyclin-dependent kinase inhibitor 2D (p19, inhibits CDK4)                     |
| 72391  | Cdkn3   | -0.20 | -0.18 | -0.04 | -0.19 | -0.11 | 0.5399 | 0.6267 | 0.4868 | 0.1027 | 0.3170 cyclin-dependent kinase inhibitor 3                                           |
| 72391  | Cdkn3   | -0.02 | 0.06  | -0.03 | -0.02 | -0.09 | 0.5769 | 0.5759 | 0.6351 | 0.5080 | 0.3805 cyclin-dependent kinase inhibitor 3                                           |
| 72391  | Cdkn3   | -0.31 | -0.28 | -0.14 | -0.11 | -0.06 | 0.6717 | 0.2850 | 0.3599 | 0.2727 | 0.0044 cyclin-dependent kinase-like 1 (CDC2-related kinase)                          |
| 71091  | Cdkn1   | -0.34 | -0.26 | -0.14 | -0.41 | -0.51 | 0.3770 | 0.5579 | 0.6155 | 0.0236 | 0.0073 cyclin-dependent kinase-like 2 (CDC2-related kinase)                          |
| 53886  | Cdk2    | -0.47 | -0.27 | -0.42 | -0.36 | -0.47 | 0.4991 | 0.5559 | 0.6152 | 0.0419 | 0.4577 cyclin-dependent kinase-like 2 (CDC2-related kinase)                          |
| 213084 | Cdk3    | -0.09 | 0.24  | 0.04  | -0.12 | -0.02 | 0.2397 | 0.4498 | 0.2825 | 0.0498 | 0.0065 cyclin-dependent kinase-like 3 (CDC2-related kinase)                          |
| 213084 | Cdk3    | 0.07  | 0.30  | 0.15  | 0.17  | 0.30  | 0.5541 | 0.0726 | 0.4258 | 0.0503 | 0.3106 cyclin-dependent kinase-like 3                                                |
| 381113 | Cdk4    | 0.00  | 0.15  | 0.00  | -0.08 | -0.09 | 0.6991 | 0.2918 | 0.5579 | 0.3924 | 0.2034 cyclin-dependent kinase-like 4                                                |
| 382253 | Cdk5    | -0.16 | -0.32 | -0.70 | -0.32 | -0.38 | 0.4737 | 0.5557 | 0.5782 | 0.1311 | 0.0266 cyclin-dependent kinase-like 4                                                |
| 67407  | Cyk1    | 0.06  | -0.14 | -0.17 | -0.04 | -0.13 | 0.5572 | 0.2321 | 0.2717 | 0.1274 | 0.0712 cyclin-dependent kinase-like 5                                                |
| 74914  | Cyk2    | 0.03  | -0.03 | -0.05 | -0.04 | 0.04  | 0.6425 | 0.4734 | 0.3855 | 0.3980 | 0.3378 cyclin, basic protein of sperm head cytoskeleton 1                            |
| 74256  | Cyk2    | -0.01 | -0.09 | -0.12 | -0.09 | -0.10 | 0.6903 | 0.3625 | 0.2309 | 0.2879 | 0.1805 cyclin, basic protein of sperm head cytoskeleton 2                            |
| 74256  | Cyk2    | 0.34  | 0.08  | 0.08  | 0.24  | 0.26  | 0.3667 | 0.5559 | 0.5589 | 0.1441 | 0.1238 cylindromatosis (turban tumor syndrome)                                       |
| 74256  | Cyk2    | -0.18 | -0.05 | 0.17  | 0.11  | 0.14  | 0.6308 | 0.3792 | 0.2163 | 0.2096 | 0.1150 cylindromatosis (turban tumor syndrome)                                       |
| 107869 | Chs     | 0.42  | -0.26 | -0.66 | 0.09  | -0.17 | 0.1445 | 0.1007 | 0.0021 | 0.3891 | 0.0065 cyclinomatosis (turban tumor syndrome)                                        |
| 12411  | Cst1    | 0.11  | 0.05  | 0.00  | 0.32  | 0.39  | 0.3964 | 0.5661 | 0.6130 | 0.0145 | 0.2244 cystathionase (cystathionine gamma-lyase)                                     |
| 58214  | Cst10   | -0.05 | 0.13  | 0.00  | -0.05 | -0.02 | 0.3685 | 0.3685 | 0.6351 | 0.4436 | 0.0014 cystathionase (cystathionine gamma-lyase)                                     |
| 78240  | Cst11   | 0.12  | 0.05  | -0.01 | -0.05 | -0.02 | 0.6037 | 0.5248 | 0.3926 | 0.3682 | 0.4519 cystatin 10 (chondrocytes)                                                    |
| 69362  | Cst12   | -0.05 | 0.08  | 0.05  | -0.04 | -0.03 | 0.5744 | 0.5014 | 0.5686 | 0.4560 | 0.4155 cystatin 11                                                                   |
| 69294  | Cst13   | -0.08 | -0.05 | -0.01 | -0.22 | -0.17 | 0.6080 | 0.3549 | 0.3756 | 0.0326 | 0.4083 cystatin 12                                                                   |
| 13012  | Cst8    | -1.17 | 0.57  | 0.23  | 0.17  | -0.94 | 0.1795 | 0.1835 | 0.3137 | 0.0167 | 0.1530 cystatin 13                                                                   |
| 13013  | Cst9    | -0.64 | -0.03 | 0.07  | 0.12  | -0.06 | 0.0853 | 0.6253 | 0.3646 | 0.4218 | 0.0001 cystatin 8 (cystatin-related epididymal spermatogenic)                        |
| 209294 | Csta    | -0.09 | -0.04 | -0.02 | 0.05  | -0.09 | 0.4513 | 0.4882 | 0.6090 | 0.5175 | 0.4270 cystatin 9                                                                    |
| 13014  | Cstb    | 0.28  | -0.44 | -0.15 | -0.14 | -0.17 | 0.4590 | 0.1460 | 0.3018 | 0.4175 | 0.1854 cystatin A                                                                    |
| 13014  | Cstb    | 0.21  | -0.17 | -0.01 | -0.01 | 0.00  | 0.4792 | 0.3624 | 0.5732 | 0.5476 | 0.3019 cystatin B                                                                    |
| 13010  | Cst3    | 0.39  | -0.74 | -0.68 | -0.02 | -0.17 | 0.3744 | 0.0298 | 0.0305 | 0.5451 | 0.4908 cystatin B                                                                    |
| 73720  | Cst6    | -0.09 | 0.02  | 0.17  | 0.00  | -0.01 | 0.6749 | 0.0069 | 0.0484 | 0.0061 | 0.3188 cystatin C                                                                    |
| 13011  | Cst7    | -0.09 | 0.14  | 0.07  | -0.10 | -0.49 | 0.6219 | 0.6217 | 0.4275 | 0.5842 | 0.4735 cystatin EM                                                                   |
| 28756  | Cst1    | -0.05 | 0.07  | -0.01 | -0.11 | -0.11 | 0.5860 | 0.3939 | 0.4102 | 0.2400 | 0.0002 cystatin EM                                                                   |
| 13007  | Csp1    | 0.42  | -0.33 | -0.12 | 0.51  | 0.66  | 0.3592 | 0.2777 | 0.4929 | 0.0441 | 0.0052 cystatin F (leukocystatin)                                                    |
| Csp2   | 0.13    | -0.47 | -0.90 | -0.60 | -0.51 | -0.99 | 0.5530 | 0.0420 | 0.0043 | 0.0154 | 0.1643 cystatin-like 1                                                               |
| 228714 | Csp2bp  | -0.65 | -0.06 | -0.06 | -0.14 | -0.18 | 0.3444 | 0.4539 | 0.4320 | 0.2161 | 0.0049 cysteine and glycine-rich protein 1                                           |
| 13009  | Csp3    | 0.16  | 0.46  | 0.63  | 0.97  | 0.43  | 0.5703 | 0.4080 | 0.1871 | 0.0570 | 0.0001 cysteine and glycine-rich protein 2                                           |
| 54151  | Oyhr1   | -0.20 | 0.22  | -0.22 | -0.38 | -0.39 | 0.5176 | 0.5622 | 0.2813 | 0.0749 | 0.1204 cysteine and glycine-rich protein 3                                           |
| 54151  | Oyhr1   | 0.12  | 0.17  | 0.88  | 0.82  | 1.58  | 0.6189 | 0.6310 | 0.1170 | 0.0521 | 0.0504 cysteine and histidine rich 1                                                 |
| 54151  | Oyhr1   | 0.07  | -0.08 | -0.30 | -0.24 | -0.17 | 0.6381 | 0.4151 | 0.1237 | 0.2820 | 0.0002 cysteine and histidine rich 1                                                 |
| 54151  | Oyhr1   | 0.02  | 0.06  | 0.05  | 0.10  | 0.21  | 0.6898 | 0.6159 | 0.5860 | 0.4600 | 0.2570 cysteine and histidine rich 1                                                 |
| 66917  | Chordc1 | 0.18  | -0.33 | -0.55 | -0.23 | -0.25 | 0.4700 | 0.3848 | 0.1064 | 0.0595 | 0.0146 cysteine and histidine-rich domain (CHORD)-containing, zinc-binding protein 1 |
| 66917  | Chordc1 | -0.03 | -0.74 | -1.43 | -1.11 | -1.55 | 0.6934 | 0.3826 | 0.0548 | 0.0111 | 0.0001 cysteine and histidine-rich domain (CHORD)-containing, zinc-binding protein 1 |
| Oyhr1  | 0.06    | -0.06 | -0.16 | -0.16 | -0.09 | -0.06 | 0.6396 | 0.5318 | 0.1905 | 0.2370 | 0.0001 cysteine and histidine-rich domain (CHORD)-containing, zinc-binding protein 1 |
| 70266  | Cdb1    | -0.12 | -0.15 | -0.42 | -0.16 | -0.75 | 0.5186 | 0.3508 | 0.0494 | 0.3166 | 0.2619 cysteine and lysine-rich protein 1                                            |
| 229905 | Cdb2    | 0.35  | -0.56 | -0.87 | -0.37 | -0.21 | 0.1862 | 0.0052 | 0.0007 | 0.0487 | 0.0000 cysteine conjugate-beta lyase 1                                               |
| 12583  | Cdb1    | 0.79  | -0.66 | -0.09 | 0.58  | 0.62  | 0.1919 | 0.3021 | 0.6100 | 0.0269 | 0.1180 cysteine conjugate-beta lyase 2                                               |
| 333088 | Cimp2   | 0.09  | -0.10 | 0.29  | -0.05 | -0.20 | 0.3829 | 0.3769 | 0.3595 | 0.5299 | 0.0060 cysteine dioxygenase 1, cytosolic                                             |
| 68337  | Cimp2   | -0.89 | 0.07  | 0.06  | 0.03  | 0.02  | 0.6624 | 0.3665 | 0.6051 | 0.4789 | 0.0702 cysteine rich BMP regulator 2 (chordin like)                                  |
| 16007  | Oyhr1   | 0.17  | 2.03  | 2.15  | 2.07  | 2.05  | 0.6119 | 0.0409 | 0.0139 | 0.0002 | 0.4683 cysteine rich protein 2                                                       |
| 50766  | Oyhr1   | 0.26  | 0.40  | -0.01 | -0.25 | -0.05 | 0.4805 | 0.4021 | 0.4663 | 0.2729 | 0.0000 cysteine rich protein 61                                                      |
| 50766  | Oyhr1   | 0.27  | 1.17  | 0.74  | 0.45  | 0.75  | 0.5274 | 0.0464 | 0.1909 | 0.1311 | 0.4135 cysteine rich transmembrane BMP regulator 1 (chordin like)                    |
| 246277 | Casid   | 0.10  | 0.37  | 0.19  | 0.35  | 0.34  | 0.5133 | 0.0937 | 0.3269 | 0.0165 | 0.0110 cysteine rich transmembrane BMP regulator 1 (chordin like)                    |
| 246277 | Casid   | 0.02  | 0.17  | 0.09  | -0.04 | -0.15 | 0.6827 | 0.4876 | 0.6120 | 0.4910 | 0.0344 cysteine sulfonic acid decarboxylase                                          |
| 74175  | Crd1    | 0.07  | 0.09  | 0.32  | 1.35  | 0.34  | 0.4760 | 0.5398 | 0.0512 | 0.2720 | 0.2004 cysteine-rich C-terminal 1                                                    |
| 12212  | Chic1   | 0.73  | -0.08 | -0.35 | -0.27 | 0.04  | 0.0983 | 0.4050 | 0.0815 | 0.0986 | 0.4175 cysteine-rich hydrophobic domain 1                                            |
| 74277  | Chic2   | 0.40  | 0.84  | 1.51  | 1.21  | 1.81  | 0.2429 | 0.0325 | 0.0027 | 0.0001 | 0.0152 cysteine-rich hydrophobic domain 1                                            |
| 74277  | Chic2   | 0.17  | -0.07 | -0.20 | -0.30 | -0.19 | 0.4491 | 0.4286 | 0.2043 | 0.0457 | 0.1124 cysteine-rich hydrophobic domain 2                                            |
| 56724  | Cript   | 0.50  | -0.36 | -0.22 | 0.03  | 0.15  | 0.3054 | 0.1086 | 0.1841 | 0.5276 | 0.2628 cysteine-rich PDZ-binding protein                                             |
| 75439  | Oyhr12  | 0.04  | -0.21 | -0.20 | -0.19 | 0.08  | 0.6981 | 0.6475 | 0.5379 | 0.1242 | 0.3209 cysteine-rich PDZ-binding protein                                             |
| 245566 | Oyhr2   | 0.00  | 0.03  | 0.04  | 0.01  | 0.02  | 0.5696 | 0.4829 | 0.5883 | 0.3072 | 0.4181 cysteine-rich perinuclear theca 12                                            |
| 69361  | Oyhr3   | 0.02  | -0.02 | 0.05  | 0.06  | -0.05 | 0.6517 | 0.6517 | 0.6158 | 0.5232 | 0.2843 cysteine-rich perinuclear theca 2                                             |
| 69361  | Oyhr3   | 0.02  | 0.15  | 0.02  | 0.01  | 0.07  | 0.6364 | 0.3288 | 0.6095 | 0.3353 | 0.3312 cysteine-rich perinuclear theca 3                                             |
| 66742  | Oyhr6   | 0.08  | 0.02  | 0.03  |       |       |        |        |        |        |                                                                                      |

|        |          |       |       |       |       |       |        |        |        |        |                                                                    |
|--------|----------|-------|-------|-------|-------|-------|--------|--------|--------|--------|--------------------------------------------------------------------|
| 11572  | Crisp3   | -0.02 | -0.01 | -0.05 | -0.04 | -0.04 | 0.6677 | 0.6505 | 0.5167 | 0.4162 | 0.3457 cysteine-rich secretory protein 3                           |
| 78081  | Crisp4   | -0.08 | 0.05  | 0.06  | -0.03 | -0.07 | 0.5046 | 0.5195 | 0.4450 | 0.4985 | 0.2808 cysteine-rich secretory protein 4                           |
| 83991  | Crispid1 | -0.23 | -0.17 | -0.12 | -0.14 | -0.20 | 0.4087 | 0.1950 | 0.2242 | 0.1304 | 0.0618 cysteine-rich secretory protein LOC1 domain containing 1    |
| 78992  | Crispid2 | -0.22 | 0.93  | 1.75  | 1.43  | 1.81  | 0.4805 | 0.0390 | 0.0028 | 0.0001 | 0.0000 cysteine-rich secretory protein LOC1 domain containing 2    |
| 171508 | Cred1    | 0.12  | 0.47  | 0.41  | 0.20  | 0.32  | 0.1596 | 0.1596 | 0.2098 | 0.1862 | 0.0407 cysteine-rich with EGF-like domains 1                       |
| 76737  | Cred2    | 0.18  | -0.12 | -0.53 | -0.16 | -0.19 | 0.3508 | 0.3616 | 0.2097 | 0.2520 | 0.1907 cysteine-rich with EGF-like domains 2                       |
| 207785 | Cnmp2    | 0.19  | -0.52 | -0.73 | -0.56 | -0.60 | 0.3508 | 0.3616 | 0.2097 | 0.2520 | 0.0000 cysteine-serine-rich nuclear protein 2                      |
| 207785 | Cnmp2    | 0.14  | -0.18 | -0.27 | -0.01 | -0.06 | 0.2034 | 0.0041 | 0.0012 | 0.0020 | 0.3355 cysteine-serine-rich nuclear protein 2                      |
| 77771  | Cnmp3    | -0.09 | 0.10  | 0.07  | -0.08 | -0.02 | 0.3944 | 0.1595 | 0.0332 | 0.5466 | 0.4145 cysteine-serine-rich nuclear protein 3                      |
| 77771  | Cnmp3    | 0.04  | 0.00  | 0.06  | 0.00  | -0.10 | 0.4623 | 0.5179 | 0.5775 | 0.3083 | 0.1975 cysteine-serine-rich nuclear protein 3                      |
| 77771  | Cnmp3    | -0.05 | 0.04  | 0.06  | 0.00  | -0.10 | 0.5905 | 0.6262 | 0.5505 | 0.5621 | 0.4323 cysteine-serine-rich nuclear protein 3                      |
| 77771  | Cnmp3    | 0.02  | -0.03 | 0.00  | -0.03 | -0.02 | 0.6673 | 0.6472 | 0.5584 | 0.4848 | 0.0466 cysteinyl leukotriene receptor 1                            |
| 58611  | Cys1r1   | 0.35  | -0.48 | -0.45 | -0.22 | -0.19 | 0.1343 | 0.0118 | 0.0150 | 0.0724 | 0.0004 cysteinyl leukotriene receptor 1                            |
| 58611  | Cys1r1   | 0.25  | -0.28 | -0.44 | -0.25 | -0.40 | 0.4490 | 0.1413 | 0.0497 | 0.0078 | 0.3762 cysteinyl leukotriene receptor 2                            |
| 70086  | Cys1r2   | 0.09  | -0.07 | -0.22 | -0.07 | -0.04 | 0.5835 | 0.6216 | 0.4393 | 0.3773 | 0.0012 cysteinyl-RNA synthetase                                    |
| 27267  | Cars     | -0.34 | 0.66  | -0.23 | 0.10  | -0.74 | 0.3475 | 0.1993 | 0.5245 | 0.4147 | 0.4733 cysteinyl-RNA synthetase                                    |
| 27267  | Cars     | 0.24  | 0.32  | 0.01  | 0.40  | 0.01  | 0.4090 | 0.4109 | 0.4915 | 0.0077 | 0.0166 cysteinyl-RNA synthetase                                    |
| 27267  | Cars     | 0.17  | 0.89  | -0.01 | 0.07  | -0.45 | 0.5662 | 0.0845 | 0.5112 | 0.4581 | 0.0001 cysteinyl-RNA synthetase 2 (mitochondrial)(putative)        |
| 71941  | Cars2    | -0.16 | -0.43 | -0.30 | -0.69 | -0.76 | 0.3988 | 0.0083 | 0.0248 | 0.0004 | 0.0035 cysteinyl-RNA synthetase 2 (mitochondrial)(putative)        |
| 12638  | Cars2    | -0.13 | 0.00  | -0.45 | -0.34 | -0.70 | 0.5858 | 0.5460 | 0.0853 | 0.0626 | 0.0027 cystic fibrosis transmembrane conductance regulator homolog |
| 12638  | Cars2    | -0.60 | 0.44  | 0.23  | -0.37 | -0.70 | 0.2689 | 0.1599 | 0.2500 | 0.0500 | 0.0034 cystic fibrosis transmembrane conductance regulator homolog |
| 12638  | Ctr      | -0.58 | 0.41  | 0.22  | -0.44 | -0.67 | 0.2835 | 0.2046 | 0.2560 | 0.0153 | 0.0023 cystic fibrosis transmembrane conductance regulator homolog |
| 12638  | Ctr      | -0.48 | 0.35  | 0.16  | -0.39 | -0.70 | 0.3359 | 0.2220 | 0.3383 | 0.0268 | 0.0198 cystic fibrosis transmembrane conductance regulator homolog |
| 12638  | Ctr      | -0.39 | 0.39  | 0.16  | -0.38 | -0.48 | 0.3444 | 0.2098 | 0.3508 | 0.0560 | 0.0028 cystic fibrosis transmembrane conductance regulator homolog |
| 12638  | Ctr      | -0.21 | 0.36  | 0.14  | -0.42 | -0.62 | 0.4714 | 0.3502 | 0.6335 | 0.0272 | 0.0792 cystic fibrosis transmembrane conductance regulator homolog |
| 12638  | Ctr      | -0.18 | 0.35  | 0.05  | -0.46 | -0.62 | 0.5525 | 0.5839 | 0.5172 | 0.2174 | 0.1907 cystic fibrosis transmembrane conductance regulator homolog |
| 12638  | Ctr      | -0.13 | 0.29  | 0.04  | -0.20 | -0.34 | 0.5645 | 0.4829 | 0.6053 | 0.0191 | 0.0059 cystic fibrosis transmembrane conductance regulator homolog |
| 12638  | Ctr      | -0.05 | 0.01  | 0.10  | -0.45 | -0.54 | 0.5577 | 0.5141 | 0.4894 | 0.0278 | 0.0050 cystic fibrosis transmembrane conductance regulator homolog |
| 12638  | Ctr      | -0.05 | 0.01  | 0.10  | -0.39 | -0.57 | 0.5830 | 0.6456 | 0.4080 | 0.0278 | 0.0059 cystic fibrosis transmembrane conductance regulator homolog |
| 12638  | Ctr      | 0.11  | 0.16  | -0.08 | -0.37 | -0.53 | 0.5857 | 0.6475 | 0.4116 | 0.0250 | 0.0008 cystin 1                                                    |
| 12638  | Ctr      | -0.64 | -0.77 | -0.14 | -1.27 | -0.95 | 0.1206 | 0.0030 | 0.3507 | 0.0004 | 0.0100 cystinosis, nephropathic                                    |
| 83429  | Cys1     | 0.87  | -0.34 | -0.30 | -0.40 | -0.26 | 0.6064 | 0.0789 | 0.0918 | 0.0029 | 0.0005 cytidine 5'-triphosphate synthase                           |
| 51797  | Ctps     | 0.26  | -0.03 | 0.77  | 0.41  | 1.01  | 0.4301 | 0.6150 | 0.0401 | 0.0102 | 0.4847 cytidine 5'-triphosphate synthase 2                         |
| 55836  | Ctps2    | -0.47 | -0.63 | 0.31  | 0.10  | 0.01  | 0.5535 | 0.6451 | 0.5194 | 0.4256 | 0.0000 cytidine and dCMP deaminase domain containing 1             |
| 71891  | Cdadc1   | 0.11  | 0.74  | 0.58  | 0.45  | 0.73  | 0.5645 | 0.0325 | 0.0673 | 0.0090 | 0.1006 cytidine and dCMP deaminase domain containing 1             |
| 71891  | Cdadc1   | 0.04  | 0.12  | 0.13  | 0.14  | 0.14  | 0.6441 | 0.5786 | 0.5340 | 0.1374 | 0.4789 cytidine and dCMP deaminase domain containing 1             |
| 71891  | Cdadc1   | 0.01  | -0.04 | -0.01 | -0.08 | 0.00  | 0.6853 | 0.5721 | 0.6360 | 0.2461 | 0.0089 cytidine deaminase                                          |
| 72269  | Cda      | -0.13 | 0.01  | -0.35 | -0.21 | -0.26 | 0.4182 | 0.5404 | 0.0508 | 0.0401 | 0.0908 cytidine monophosphate (UMP-CMP) kinase 1                   |
| 66588  | Cmpk1    | 0.14  | -0.01 | -0.04 | 0.20  | 0.23  | 0.5546 | 0.6298 | 0.5901 | 0.2721 | 0.0001 cytidine monophosphate (UMP-CMP) kinase 2, mitochondrial    |
| 22169  | Cmpk2    | 0.16  | -0.41 | -0.63 | -0.49 | -0.70 | 0.6350 | 0.1464 | 0.0307 | 0.0081 | 0.0108 cytidine monophosphate (UMP-CMP) kinase 2, mitochondrial    |
| 22169  | Cmpk2    | -0.08 | -0.23 | -0.22 | -0.43 | -0.49 | 0.4287 | 0.5836 | 0.5431 | 0.3262 | 0.0776 cytidine monophospho-N-acetylneuraminic acid hydroxylase    |
| 12763  | Cmah     | -0.17 | -0.04 | -0.04 | -0.08 | -0.18 | 0.5399 | 0.0476 | 0.0072 | 0.0351 | 0.0001 cytidine monophospho-N-acetylneuraminic acid hydroxylase    |
| 12763  | Cmah     | 0.14  | -0.43 | -0.70 | -0.33 | -0.69 | 0.6205 | 0.2063 | 0.3980 | 0.0311 | 0.1502 cytidine monophospho-N-acetylneuraminic acid synthetase     |
| 12764  | Cmas     | -0.12 | 0.77  | 0.44  | -0.43 | -0.24 | 0.4444 | 0.3280 | 0.5451 | 0.4556 | 0.3949 cytochrome b reductase 1                                    |
| 73949  | Cybd1    | 0.11  | -0.16 | -0.10 | -0.08 | 0.03  | 0.5225 | 0.4508 | 0.2173 | 0.5155 | 0.4776 cytochrome b reductase 1                                    |
| 73949  | Cybd1    | 0.11  | -0.10 | -0.10 | 0.02  | 0.01  | 0.6775 | 0.2788 | 0.2321 | 0.2000 | 0.0942 cytochrome b reductase 1                                    |
| 225912 | Cybsc3   | -0.16 | -0.77 | -0.94 | -0.82 | -1.37 | 0.5135 | 0.0297 | 0.0057 | 0.0055 | 0.0001 cytochrome b, ascorbate dependent 3                         |
| 13057  | Cyba     | -0.04 | 0.29  | 0.13  | 0.16  | 0.05  | 0.6763 | 0.4839 | 0.6271 | 0.4127 | 0.4465 cytochrome b-245, alpha polypeptide                         |
| 13058  | Cybb     | -0.11 | -0.15 | -0.43 | -0.29 | -0.65 | 0.5813 | 0.4689 | 0.0100 | 0.2401 | 0.0084 cytochrome b-245, beta polypeptide                          |
| 13058  | Cybb     | 0.06  | 0.42  | 0.03  | -0.33 | -0.28 | 0.6594 | 0.4820 | 0.4288 | 0.0269 | 0.0316 cytochrome b-245, beta polypeptide                          |
| 109972 | Cybb     | -0.46 | -0.55 | -0.82 | -0.35 | -0.09 | 0.3459 | 0.0653 | 0.0161 | 0.2315 | 0.4169 cytochrome b-5                                              |
| 327951 | Cybsd1   | -0.13 | 0.02  | 0.06  | -0.06 | -0.05 | 0.3089 | 0.6303 | 0.4440 | 0.3577 | 0.2147 cytochrome b5 domain containing 1                           |
| 72017  | Cybs1    | 0.03  | -0.12 | -0.19 | -0.35 | -0.30 | 0.3896 | 0.4841 | 0.0760 | 0.4841 | 0.0302 cytochrome b5 reductase 1                                   |
| 72017  | Cybs1    | 0.13  | -0.09 | -0.07 | 0.25  | 0.33  | 0.4919 | 0.4912 | 0.5397 | 0.1522 | 0.0272 cytochrome b5 reductase 1                                   |
| 320635 | Cybs2    | -0.04 | -0.03 | -0.07 | -0.04 | -0.03 | 0.5951 | 0.5787 | 0.4095 | 0.4426 | 0.3892 cytochrome b5 reductase 2                                   |
| 109754 | Cybs3    | 0.62  | -0.27 | -0.23 | 0.19  | 0.30  | 0.2209 | 0.2921 | 0.3111 | 0.2820 | 0.1309 cytochrome b5 reductase 2                                   |
| 109754 | Cybs3    | -0.27 | -0.13 | 0.36  | 0.27  | 0.33  | 0.4469 | 0.6270 | 0.1363 | 0.2800 | 0.1134 cytochrome b5 reductase 3                                   |
| 266900 | Cybs4    | 0.39  | -0.43 | -0.68 | -0.26 | -0.29 | 0.3199 | 0.0911 | 0.0122 | 0.2028 | 0.0832 cytochrome b5 reductase 3                                   |
| 266900 | Cybs4    | -0.23 | 0.13  | -0.06 | -0.47 | -0.30 | 0.4987 | 0.2854 | 0.5038 | 0.0668 | 0.0928 cytochrome b5 reductase 4                                   |
| 266900 | Cybs4    | -0.13 | -0.19 | -0.60 | -0.65 | -0.93 | 0.5518 | 0.3348 | 0.0236 | 0.0043 | 0.0001 cytochrome b5 reductase 4                                   |
| 66427  | Cybsb    | 0.87  | -0.68 | -1.22 | -0.25 | -0.81 | 0.0853 | 0.1540 | 0.0092 | 0.0934 | 0.0002 cytochrome b5 type B                                        |
| 66427  | Cybsb    | 0.34  | -0.15 | -0.34 | -0.10 | -0.30 | 0.1270 | 0.3253 | 0.1036 | 0.1282 | 0.0353 cytochrome b5 type B                                        |
| 13056  | Cybs1    | 0.24  | -0.09 | 0.12  | 0.12  | 0.28  | 0.3699 | 0.3380 | 0.6256 | 0.2962 | 0.0210 cytochrome b-561                                            |
| 72023  | Cybs5101 | 0.17  | -0.18 | -0.18 | -0.26 | -0.46 | 0.1772 | 0.5499 | 0.3963 | 0.0735 | 0.0060 cytochrome b-561 domain containing 1                        |
| 56368  | Cybs5102 | -0.23 | -0.08 | -0.37 | -0.54 | -1.03 | 0.4839 | 0.4376 | 0.1550 | 0.0116 | 0.0004 cytochrome b-561 domain containing 2                        |
| 12857  | Cox41    | 0.02  | -0.23 | -0.43 | -0.35 | -0.52 | 0.5433 | 0.2716 | 0.0518 | 0.0766 | 0.0095 cytochrome c oxidase subunit IV isoform 1                   |
| 84682  | Cox42    | -0.05 | 0.12  | 0.13  | 0.14  | 0.12  | 0.5663 | 0.2312 | 0.1882 | 0.0629 | 0.0769 cytochrome c oxidase subunit IV isoform 2                   |
| 33182  | Cox6b2   | -0.50 | -0.04 | -0.25 | -0.86 | -1.23 | 0.2560 | 0.5371 | 0.2983 | 0.0033 | 0.0000 cytochrome c oxidase subunit Vb polypeptide 2               |
| 20463  | Cox7a2   | 0.28  | -0.13 | -0.32 | -0.16 | -0.27 | 0.4490 | 0.3722 | 0.1477 | 0.2505 | 0.1101 cytochrome c oxidase subunit Vb polypeptide 2-like          |
| 66142  | Cox7b    | 0.11  | -0.64 | -0.51 | -0.51 | -0.70 | 0.6061 | 0.0722 | 0.0689 | 0.0283 | 0.0039 cytochrome c oxidase subunit Vlb                            |
| 78174  | Cox7c    | 0.06  | 0.00  | 0.01  | 0.01  | -0.08 | 0.5421 | 0.1644 | 0.6254 | 0.5230 | 0.2275 cytochrome c oxidase subunit Vlb2                           |
| 12858  | Cox6a    | -1.16 | 0.19  | 0.09  | -0.18 | -0.53 | 0.3462 | 0.3423 | 0.3540 | 0.3210 | 0.0059 cytochrome c oxidase, subunit Va                            |
| 12859  | Cox6b    | -0.25 | -0.27 | -0.25 | -0.34 | -0.57 | 0.4645 | 0.2837 | 0.2649 | 0.0851 | 0.0075 cytochrome c oxidase, subunit Vb                            |
| 12861  | Cox6a1   | -0.99 | 0.03  | 0.11  | -0.07 | -0.06 | 0.4456 | 0.3973 | 0.4218 | 0.4640 | 0.4059 cytochrome c oxidase, subunit VI a, polypeptide 1           |
| 12862  | Cox6a2   | -1.21 | 0.22  | 0.49  | 0.19  | -0.01 | 0.2065 | 0.2935 | 0.1720 | 0.4284 | 0.4713 cytochrome c oxidase, subunit VI a, polypeptide 2           |
| 110323 | Cox6b1   | -0.74 | -0.07 | 0.10  | -0.23 | -0.55 | 0.3561 | 0.4760 | 0.3675 | 0.1630 | 0.0243 cytochrome c oxidase, subunit Vb polypeptide 1              |
| 12864  | Cox6c    | -0.01 | -0.04 | -0.08 | -0.57 | -0.39 | 0.7006 | 0.4770 | 0.3903 | 0.0421 | 0.0343 cytochrome c oxidase, subunit Vlc                           |
| 12866  | Cox7a1   | -0.30 | 0.09  | 0.00  | 0.10  | -0.49 | 0.5110 | 0.6466 | 0.5781 | 0.5213 | 0.1580 cytochrome c oxidase, subunit VII a                         |
| 12866  | Cox7a2   | -0.21 | -0.34 | -0.23 | -0.71 | -1.07 | 0.5200 | 0.3899 | 0.3681 | 0.0038 | 0.0003 cytochrome c oxidase, subunit VII a                         |
| 12867  | Cox7c    | -0.58 | 0.44  | 0.30  | -0.66 | -0.99 | 0.6594 | 0.3866 | 0.3723 | 0.0069 | 0.0012 cytochrome c oxidase, subunit VII a                         |
| 12868  | Cox8a    | -0.63 | -0.33 | -0.12 | -0.16 | -0.25 |        |        |        |        |                                                                    |

|        |         |       |       |       |       |       |        |        |        |        |                                                                |
|--------|---------|-------|-------|-------|-------|-------|--------|--------|--------|--------|----------------------------------------------------------------|
| 13077  | Cyp1a2  | -0.07 | 0.04  | 0.02  | 0.12  | 0.10  | 0.5746 | 0.5282 | 0.5599 | 0.4141 | 0.3860 cytochrome P450, family 1, subfamily a, polypeptide 2   |
| 13077  | Cyp1a2  | 0.02  | 0.02  | -0.02 | 0.03  | 0.11  | 0.6448 | 0.5711 | 0.4792 | 0.4141 | 0.3131 cytochrome P450, family 1, subfamily a, polypeptide 2   |
| 13078  | Cyp1b1  | -0.24 | -0.34 | 0.12  | 0.31  | 0.31  | 0.3904 | 0.0968 | 0.1931 | 0.4792 | 0.0353 cytochrome P450, family 1, subfamily b, polypeptide 1   |
| 13078  | Cyp1b1  | 0.02  | 0.34  | 0.42  | 0.29  | 0.38  | 0.6531 | 0.0340 | 0.0126 | 0.0072 | 0.0032 cytochrome P450, family 1, subfamily b, polypeptide 1   |
| 13070  | Cyp11a1 | -0.15 | 0.04  | -0.03 | 0.05  | -0.06 | 0.4062 | 0.6023 | 0.5062 | 0.3909 | 0.3602 cytochrome P450, family 11, subfamily a, polypeptide 1  |
| 13070  | Cyp11a1 | -0.08 | 0.07  | 0.12  | 0.00  | -0.06 | 0.4266 | 0.4560 | 0.2548 | 0.5968 | 0.2950 cytochrome P450, family 11, subfamily a, polypeptide 1  |
| 13070  | Cyp11a1 | 0.04  | 0.06  | -0.11 | 0.00  | 0.03  | 0.5891 | 0.4678 | 0.3320 | 0.5509 | 0.3768 cytochrome P450, family 11, subfamily a, polypeptide 1  |
| 13072  | Cyp11b2 | -0.10 | -0.08 | -0.07 | -0.02 | 0.03  | 0.3967 | 0.3379 | 0.3186 | 0.5020 | 0.4083 cytochrome P450, family 11, subfamily b, polypeptide 2  |
| 13074  | Cyp17a1 | -0.43 | 0.38  | 0.24  | -1.13 | -1.50 | 0.5554 | 0.6082 | 0.5317 | 0.0208 | 0.0015 cytochrome P450, family 17, subfamily a, polypeptide 1  |
| 13075  | Cyp19a1 | 0.02  | 0.02  | 0.06  | 0.06  | 0.01  | 0.6396 | 0.5668 | 0.3935 | 0.3008 | 0.4641 cytochrome P450, family 19, subfamily a, polypeptide 1  |
| 13075  | Cyp19a1 | 0.00  | -0.04 | -0.05 | -0.07 | -0.01 | 0.7017 | 0.5675 | 0.5181 | 0.2927 | 0.4519 cytochrome P450, family 19, subfamily a, polypeptide 1  |
| 13075  | Cyp2a12 | 0.15  | -0.09 | -0.11 | 0.15  | 0.15  | 0.4021 | 0.4105 | 0.3351 | 0.3562 | 0.2127 cytochrome P450, family 19, subfamily a, polypeptide 12 |
| 13086  | Cyp2a4  | -0.78 | -1.65 | -2.69 | -1.91 | -2.85 | 0.4658 | 0.3132 | 0.0503 | 0.0019 | 0.0000 cytochrome P450, family 2, subfamily a, polypeptide 4   |
| 13086  | Cyp2a4  | -0.23 | -1.55 | -2.15 | -1.51 | -2.26 | 0.5507 | 0.0141 | 0.0012 | 0.0003 | 0.0000 cytochrome P450, family 2, subfamily a, polypeptide 4   |
| 13087  | Cyp2a5  | -0.69 | -1.63 | -2.90 | -2.12 | -3.36 | 0.4214 | 0.1418 | 0.0068 | 0.0006 | 0.0000 cytochrome P450, family 2, subfamily a, polypeptide 5   |
| 13087  | Cyp2a5  | 0.00  | -1.69 | -2.86 | -1.95 | -2.99 | 0.7032 | 0.0094 | 0.0008 | 0.0001 | 0.0000 cytochrome P450, family 2, subfamily a, polypeptide 5   |
| 224044 | Cyp2ab1 | -0.10 | 0.03  | -0.03 | 0.03  | -0.06 | 0.4428 | 0.5860 | 0.5001 | 0.3957 | 0.2782 cytochrome P450, family 2, subfamily ab, polypeptide 1  |
| 13088  | Cyp2b10 | 0.60  | -0.80 | -0.26 | 0.27  | 1.16  | 0.3075 | 0.1365 | 0.4380 | 0.4256 | 0.0661 cytochrome P450, family 2, subfamily b, polypeptide 10  |
| 13088  | Cyp2b10 | -0.46 | -0.58 | -0.08 | 0.13  | 0.71  | 0.5595 | 0.6358 | 0.4380 | 0.4256 | 0.0142 cytochrome P450, family 2, subfamily b, polypeptide 10  |
| 13089  | Cyp2b13 | -0.13 | -0.04 | 0.12  | -0.05 | -0.11 | 0.5023 | 0.6035 | 0.3333 | 0.4903 | 0.2814 cytochrome P450, family 2, subfamily b, polypeptide 13  |
| 13089  | Cyp2b13 | -0.04 | -0.78 | -0.46 | 0.01  | 0.74  | 0.6904 | 0.4890 | 0.6247 | 0.5594 | 0.0177 cytochrome P450, family 2, subfamily b, polypeptide 13  |
| 13090  | Cyp2b19 | -0.12 | -0.01 | -0.05 | -0.18 | -0.11 | 0.3655 | 0.6285 | 0.5049 | 0.0544 | 0.1385 cytochrome P450, family 2, subfamily b, polypeptide 19  |
| 243881 | Cyp2b23 | -0.06 | -0.01 | 0.11  | -0.08 | -0.11 | 0.5503 | 0.6357 | 0.3195 | 0.4231 | 0.3689 cytochrome P450, family 2, subfamily b, polypeptide 19  |
| 13094  | Cyp2b9  | 0.27  | -0.64 | -0.44 | -0.33 | 0.36  | 0.4353 | 0.5721 | 0.5224 | 0.2331 | 0.1472 cytochrome P450, family 2, subfamily b, polypeptide 23  |
| 13094  | Cyp2b9  | 0.55  | -0.68 | -0.16 | 0.17  | 0.98  | 0.3027 | 0.0059 | 0.0448 | 0.4262 | 0.0687 cytochrome P450, family 2, subfamily b, polypeptide 9   |
| 13095  | Cyp2c38 | 0.15  | -0.21 | -0.30 | 0.55  | 0.41  | 0.5767 | 0.5322 | 0.4178 | 0.3092 | 0.0058 cytochrome P450, family 2, subfamily b, polypeptide 9   |
| 13097  | Cyp2c38 | 0.07  | 0.04  | -0.10 | 0.03  | -0.02 | 0.6294 | 0.6294 | 0.4178 | 0.4327 | 0.2515 cytochrome P450, family 2, subfamily c, polypeptide 29  |
| 13097  | Cyp2c38 | 0.02  | -0.05 | -0.02 | -0.02 | -0.03 | 0.6498 | 0.3888 | 0.5239 | 0.4949 | 0.4279 cytochrome P450, family 2, subfamily c, polypeptide 38  |
| 13098  | Cyp2c39 | 0.11  | -0.13 | -0.29 | 0.16  | 0.17  | 0.4291 | 0.2533 | 0.3123 | 0.2709 | 0.3702 cytochrome P450, family 2, subfamily c, polypeptide 38  |
| 13099  | Cyp2c40 | 0.14  | -0.14 | 0.28  | 0.18  | 0.18  | 0.4538 | 0.3652 | 0.3511 | 0.2709 | 0.1815 cytochrome P450, family 2, subfamily c, polypeptide 39  |
| 226143 | Cyp2c44 | 0.28  | -0.20 | -0.31 | 0.68  | 0.54  | 0.4813 | 0.5432 | 0.4173 | 0.2991 | 0.2470 cytochrome P450, family 2, subfamily c, polypeptide 40  |
| 404195 | Cyp2c54 | 0.23  | -0.33 | -0.35 | 0.21  | 0.06  | 0.3038 | 0.0777 | 0.0336 | 0.3146 | 0.1941 cytochrome P450, family 2, subfamily c, polypeptide 40  |
| 72082  | Cyp2c55 | 0.03  | 0.05  | -0.03 | 0.02  | 0.07  | 0.6390 | 0.6437 | 0.4517 | 0.5106 | 0.3677 cytochrome P450, family 2, subfamily c, polypeptide 44  |
| 72303  | Cyp2c65 | -0.09 | 0.07  | 0.01  | 0.14  | 0.19  | 0.4399 | 0.6511 | 0.5191 | 0.3241 | 0.2331 cytochrome P450, family 2, subfamily c, polypeptide 54  |
| 69888  | Cyp2c66 | 0.02  | -0.15 | 0.01  | 0.06  | -0.06 | 0.4129 | 0.3926 | 0.2926 | 0.3125 | 0.2579 cytochrome P450, family 2, subfamily c, polypeptide 55  |
| 226105 | Cyp2c70 | 0.17  | -0.09 | -0.04 | 0.60  | 0.33  | 0.6449 | 0.1421 | 0.5488 | 0.4349 | 0.2015 cytochrome P450, family 2, subfamily c, polypeptide 66  |
| 13101  | Cyp2d10 | 0.19  | 0.06  | 0.10  | 0.04  | -0.08 | 0.5960 | 0.4725 | 0.5206 | 0.1280 | 0.2809 cytochrome P450, family 2, subfamily c, polypeptide 70  |
| 380987 | Cyp2d12 | -0.12 | -0.01 | 0.36  | 0.63  | 0.65  | 0.5645 | 0.6144 | 0.5769 | 0.1334 | 0.1732 cytochrome P450, family 2, subfamily d, polypeptide 10  |
| 56448  | Cyp2d22 | 0.22  | -0.08 | 0.07  | 0.38  | 0.53  | 0.4172 | 0.4048 | 0.6397 | 0.0687 | 0.0070 cytochrome P450, family 2, subfamily d, polypeptide 12  |
| 56448  | Cyp2d22 | -0.11 | -0.16 | -0.15 | -0.35 | -0.67 | 0.5415 | 0.4043 | 0.3172 | 0.0179 | 0.0016 cytochrome P450, family 2, subfamily d, polypeptide 22  |
| 76279  | Cyp2d34 | 0.09  | 0.04  | 0.57  | 0.75  | 1.07  | 0.3923 | 0.6126 | 0.1555 | 0.0510 | 0.0016 cytochrome P450, family 2, subfamily d, polypeptide 22  |
| 223706 | Cyp2d36 | 0.41  | -0.05 | -0.06 | 0.09  | 0.11  | 0.6553 | 0.5421 | 0.5231 | 0.4159 | 0.1446 cytochrome P450, family 2, subfamily d, polypeptide 26  |
| 13105  | Cyp2d9  | 0.13  | 0.00  | 0.29  | 0.50  | 0.54  | 0.6064 | 0.4567 | 0.5991 | 0.0130 | 0.2877 cytochrome P450, family 2, subfamily d, polypeptide 34  |
| 13105  | Cyp2d9  | 0.05  | 0.06  | 0.40  | 0.66  | 0.76  | 0.6675 | 0.5702 | 0.4297 | 0.0360 | 0.0091 cytochrome P450, family 2, subfamily d, polypeptide 9   |
| 13106  | Cyp2e1  | 1.34  | -1.95 | -1.41 | 1.37  | 0.56  | 0.3441 | 0.2635 | 0.4561 | 0.0868 | 0.0079 cytochrome P450, family 2, subfamily d, polypeptide 9   |
| 13107  | Cyp2f2  | 0.20  | -0.33 | -0.36 | -0.11 | -0.11 | 0.4638 | 0.1588 | 0.1400 | 0.3643 | 0.2186 cytochrome P450, family 2, subfamily e, polypeptide 1   |
| 13108  | Cyp2g1  | 0.11  | -0.11 | -0.08 | -0.11 | 0.08  | 0.3221 | 0.1629 | 0.2560 | 0.2732 | 0.3183 cytochrome P450, family 2, subfamily e, polypeptide 2   |
| 13108  | Cyp2g1  | 0.01  | -0.04 | -0.03 | 0.03  | -0.02 | 0.6769 | 0.5552 | 0.5038 | 0.4520 | 0.2083 cytochrome P450, family 2, subfamily g, polypeptide 1   |
| 100066 | Cyp2i11 | -0.04 | 0.05  | 0.14  | -0.06 | -0.05 | 0.5755 | 0.6100 | 0.4958 | 0.3397 | 0.2752 cytochrome P450, family 2, subfamily g, polypeptide 11  |
| 100066 | Cyp2i11 | 0.00  | 0.00  | 0.04  | 0.04  | -0.03 | 0.7022 | 0.5552 | 0.6320 | 0.4308 | 0.3873 cytochrome P450, family 2, subfamily j, polypeptide 11  |
| 230459 | Cyp2i13 | -0.06 | 0.06  | 0.00  | -0.11 | 0.00  | 0.5193 | 0.5228 | 0.5862 | 0.2011 | 0.4870 cytochrome P450, family 2, subfamily j, polypeptide 13  |
| 230459 | Cyp2i13 | -0.06 | 0.01  | 0.06  | -0.02 | -0.01 | 0.5528 | 0.6486 | 0.4817 | 0.4931 | 0.4870 cytochrome P450, family 2, subfamily j, polypeptide 13  |
| 13109  | Cyp2j5  | 0.06  | -0.17 | -0.08 | 0.06  | 0.03  | 0.5842 | 0.1577 | 0.3576 | 0.3994 | 0.4430 cytochrome P450, family 2, subfamily j, polypeptide 13  |
| 13109  | Cyp2j5  | 0.05  | -0.04 | -0.03 | 0.11  | 0.15  | 0.5776 | 0.6043 | 0.6320 | 0.3135 | 0.1362 cytochrome P450, family 2, subfamily j, polypeptide 5   |
| 13110  | Cyp2j6  | 0.04  | -0.06 | -0.03 | 0.28  | 0.11  | 0.6017 | 0.5515 | 0.6409 | 0.2124 | 0.3122 cytochrome P450, family 2, subfamily j, polypeptide 5   |
| 74519  | Cyp2j6  | -0.89 | -0.36 | -0.41 | -0.20 | 0.28  | 0.5561 | 0.7000 | 0.1725 | 0.4765 | 0.1399 cytochrome P450, family 2, subfamily j, polypeptide 6   |
| 244209 | Cyp2j1  | -0.03 | -0.03 | -0.12 | -0.16 | -0.02 | 0.6380 | 0.3627 | 0.2422 | 0.5127 | 0.4329 cytochrome P450, family 2, subfamily j, polypeptide 9   |
| 74134  | Cyp2s1  | -0.74 | -0.30 | -0.72 | -0.40 | -0.52 | 0.4839 | 0.5121 | 0.3475 | 0.5027 | 0.0478 cytochrome P450, family 2, subfamily r, polypeptide 1   |
| 74134  | Cyp2s1  | -0.08 | 0.07  | 0.18  | -0.02 | 0.00  | 0.5017 | 0.3581 | 0.3475 | 0.5027 | 0.4922 cytochrome P450, family 2, subfamily s, polypeptide 1   |
| 71519  | Cyp2u1  | -0.16 | 0.23  | 0.03  | 0.18  | -0.05 | 0.3219 | 0.0799 | 0.1831 | 0.3918 | 0.2810 cytochrome P450, family 2, subfamily s, polypeptide 1   |
| 545817 | Cyp2w1  | 0.03  | 0.00  | 0.05  | 0.05  | -0.07 | 0.6236 | 0.5061 | 0.6403 | 0.4324 | 0.4276 cytochrome P450, family 2, subfamily w, polypeptide 1   |
| 13096  | Cyp2c37 | 0.39  | -0.07 | -0.14 | 0.27  | 0.14  | 0.4517 | 0.3678 | 0.6181 | 0.2964 | 0.3480 cytochrome P450, family 2, subfamily c, polypeptide 37  |
| 13096  | Cyp2c37 | 0.06  | 0.07  | 0.18  | 0.18  | 0.02  | 0.6283 | 0.5326 | 0.6181 | 0.3041 | 0.4619 cytochrome P450, family 2, subfamily c, polypeptide 37  |
| 77951  | Cyp2oa1 | 0.71  | 0.01  | 0.24  | 0.65  | 0.58  | 0.0546 | 0.4818 | 0.4894 | 0.0002 | 0.0003 cytochrome P450, family 20, subfamily A, polypeptide 1  |
| 13079  | Cyp21a1 | 0.18  | 0.11  | -0.04 | -0.05 | -0.05 | 0.4708 | 0.6071 | 0.3441 | 0.3345 | 0.3049 cytochrome P450, family 21, subfamily A, polypeptide 1  |
| 13081  | Cyp2a41 | 0.00  | 0.10  | 0.06  | -0.03 | -0.08 | 0.6976 | 0.5992 | 0.6281 | 0.4970 | 0.2435 cytochrome P450, family 24, subfamily a, polypeptide 1  |
| 13082  | Cyp28a1 | -0.17 | 0.17  | 0.08  | -0.06 | -0.02 | 0.4088 | 0.1650 | 0.3709 | 0.4563 | 0.4653 cytochrome P450, family 26, subfamily a, polypeptide 1  |
| 232174 | Cyp28b1 | 0.43  | 0.72  | -1.57 | -0.42 | 0.26  | 0.5728 | 0.4360 | 0.0686 | 0.4091 | 0.4257 cytochrome P450, family 26, subfamily b, polypeptide 1  |
| 104086 | Cyp27a1 | 0.15  | -0.17 | 0.11  | 0.38  | 0.43  | 0.5094 | 0.4979 | 0.4856 | 0.0764 | 0.0202 cytochrome P450, family 27, subfamily a, polypeptide 1  |
| 13115  | Cyp27b1 | 0.26  | -0.06 | 0.21  | 0.27  | -0.01 | 0.3656 | 0.5786 | 0.5786 | 0.1329 | 0.4484 cytochrome P450, family 27, subfamily b, polypeptide 1  |
| 13115  | Cyp27b1 | 0.01  | 0.07  | 0.10  | 0.13  | 0.07  | 0.6894 | 0.5084 | 0.4288 | 0.1446 | 0.2371 cytochrome P450, family 27, subfamily b, polypeptide 1  |
| 13112  | Cyp3a11 | -0.31 | -0.10 | -0.20 | 0.11  | 0.09  | 0.4043 | 0.5984 | 0.4657 | 0.5107 | 0.4473 cytochrome P450, family 3, subfamily a, polypeptide 11  |
| 13113  | Cyp3a13 | -0.41 | -0.25 | -0.07 | -0.23 | -0.28 | 0.3916 | 0.6476 | 0.4979 | 0.2165 | 0.0127 cytochrome P450, family 3, subfamily a, polypeptide 13  |
| 13114  | Cyp3a16 | 0.07  | 0.02  | -0.09 | 0.44  | 0.33  | 0.6771 | 0.5455 | 0.5727 | 0.2461 | 0.2310 cytochrome P450, family 3, subfamily a, polypeptide 16  |
| 56388  | Cyp3a25 | -0.01 | -0.04 | 0.03  | 0.06  | -0.06 | 0.3974 | 0.3974 | 0.5873 | 0.3201 |                                                                |

|            |         |       |       |       |       |       |        |        |        |                                                                          |
|------------|---------|-------|-------|-------|-------|-------|--------|--------|--------|--------------------------------------------------------------------------|
| 230639     | Cyp4a29 | -0.02 | 0.00  | 0.01  | 0.03  | 0.04  | 0.5660 | 0.6025 | 0.4479 | 0.3444 cytochrome P450, family 4, subfamily a, polypeptide 29            |
| 666168     | Cyp4a31 | 0.07  | -0.11 | -0.06 | -0.06 | -0.07 | 0.1987 | 0.3467 | 0.3134 | 0.2656 cytochrome P450, family 4, subfamily a, polypeptide 31            |
| 666168     | Cyp4a31 | -0.03 | -0.15 | -0.08 | 0.46  | 0.10  | 0.5682 | 0.6430 | 0.1258 | 0.3646 cytochrome P450, family 4, subfamily a, polypeptide 31            |
| 131200     | Cyp4b1  | -0.08 | -0.75 | -0.33 | 0.19  | 0.26  | 0.6098 | 0.5430 | 0.3475 | 0.2465 cytochrome P450, family 4, subfamily b, polypeptide 1             |
| 170716     | Cyp4f13 | 0.08  | -0.09 | -0.09 | 0.26  | 0.29  | 0.6483 | 0.3997 | 0.2438 | 0.0795 cytochrome P450, family 4, subfamily f, polypeptide 13            |
| 643855     | Cyp4f14 | 0.01  | 0.00  | 0.06  | 0.22  | 0.13  | 0.6890 | 0.6416 | 0.3536 | 0.3443 cytochrome P450, family 4, subfamily f, polypeptide 14            |
| 106648     | Cyp4f15 | -0.22 | -0.29 | -1.24 | -1.26 | -0.02 | 0.4634 | 0.3345 | 0.0045 | 0.0000 cytochrome P450, family 4, subfamily f, polypeptide 15            |
| 70101      | Cyp4f16 | 0.08  | -0.12 | 0.03  | 0.08  | 0.10  | 0.6890 | 0.6134 | 0.3749 | 0.1953 cytochrome P450, family 4, subfamily f, polypeptide 16            |
| 70101      | Cyp4f16 | 0.00  | -0.41 | -0.46 | -0.45 | -0.64 | 0.5479 | 0.2990 | 0.0074 | 0.0001 cytochrome P450, family 4, subfamily f, polypeptide 16            |
| 72054      | Cyp4f18 | -1.36 | 0.92  | 0.04  | 0.14  | -0.23 | 0.7027 | 0.0308 | 0.0190 | 0.1123 cytochrome P450, family 4, subfamily f, polypeptide 18            |
| 320997     | Cyp4f39 | -0.22 | 0.55  | 0.91  | 0.60  | 0.65  | 0.0109 | 0.0715 | 0.5558 | 0.0007 cytochrome P450, family 4, subfamily f, polypeptide 18            |
| Cyp4f41-ps |         | 0.03  | -0.09 | -0.05 | -0.10 | -0.17 | 0.3668 | 0.0098 | 0.0014 | 0.0032 cytochrome P450, family 4, subfamily f, polypeptide 39            |
| 102294     | Cyp4v3  | 0.01  | -0.58 | -0.39 | 0.03  | -0.07 | 0.5925 | 0.3470 | 0.1782 | 0.0329 cytochrome P450, family 4, subfamily f, polypeptide 41 pseudogene |
| 81906      | Cyp4x1  | 0.14  | -0.26 | -0.27 | 0.02  | -0.11 | 0.7023 | 0.6460 | 0.4954 | 0.3629 cytochrome P450, family 4, subfamily x, polypeptide 3             |
| 131106     | Cyp4ba1 | -0.31 | -0.06 | 0.05  | 0.08  | -0.11 | 0.5735 | 0.4211 | 0.3878 | 0.2008 cytochrome P450, family 4, subfamily b, polypeptide 1             |
| 13121      | Cyp5f1  | -0.31 | -0.06 | -0.31 | 0.01  | -0.32 | 0.1270 | 0.5763 | 0.4649 | 0.1854 cytochrome P450, family 46, subfamily a, polypeptide 1            |
| 13121      | Cyp5f1  | -0.07 | -0.35 | -0.53 | -0.25 | -0.56 | 0.4264 | 0.6142 | 0.5203 | 0.0072 cytochrome P450, family 51                                        |
| 13121      | Cyp5f1  | -0.02 | -0.04 | -0.13 | -0.02 | -0.05 | 0.5480 | 0.0244 | 0.0024 | 0.0007 cytochrome P450, family 51                                        |
| 13122      | Cyp7a1  | -0.03 | -0.01 | 0.10  | -0.05 | -0.07 | 0.6370 | 0.0579 | 0.3478 | 0.3212 cytochrome P450, family 51                                        |
| 13122      | Cyp7a1  | -0.02 | 0.09  | 0.10  | 0.00  | -0.02 | 0.6496 | 0.5627 | 0.5478 | 0.2549 cytochrome P450, family 7, subfamily a, polypeptide 1             |
| 13122      | Cyp7b1  | -0.99 | 0.12  | -0.26 | -0.57 | -0.62 | 0.2103 | 0.3596 | 0.5745 | 0.4280 cytochrome P450, family 7, subfamily a, polypeptide 1             |
| 13124      | Cyp3b1  | -0.05 | 0.02  | 0.01  | -0.05 | -0.02 | 0.5620 | 0.6492 | 0.0186 | 0.0029 cytochrome P450, family 7, subfamily b, polypeptide 1             |
| 114886     | Cypb    | 0.03  | -0.11 | -0.36 | -0.46 | -0.46 | 0.6683 | 0.3110 | 0.0472 | 0.4148 cytochrome P450, family 8, subfamily b, polypeptide 1             |
| 109006     | Claipn1 | -1.08 | 0.62  | 0.41  | -0.53 | -0.97 | 0.6683 | 0.0685 | 0.5178 | 0.0136 cytoglobin                                                        |
| 109006     | Claipn1 | 0.11  | -0.01 | 0.04  | 0.04  | 0.01  | 0.3544 | 0.5309 | 0.0034 | 0.0006 cytokine induced apoptosis inhibitor 1                            |
| 12700      | Cish    | 0.40  | 0.76  | 1.38  | 1.06  | 1.54  | 0.3367 | 0.0995 | 0.3703 | 0.4359 cytokine induced apoptosis inhibitor 1                            |
| 231162     | Cytl1   | 0.30  | 0.38  | 0.59  | 0.30  | -0.03 | 0.4717 | 0.1891 | 0.2504 | 0.4687 cytokine like 1                                                   |
| 12931      | Cytl1   | -1.41 | 0.30  | 0.45  | -0.25 | -0.29 | 0.1526 | 0.2576 | 0.1629 | 0.1224 cytokine receptor-like factor 1                                   |
| 12931      | Cytl1   | 0.03  | -0.26 | 0.22  | 0.27  | 0.57  | 0.6524 | 0.1270 | 0.2664 | 0.0036 cytokine receptor-like factor 1                                   |
| 57914      | Cytl2   | 0.17  | 0.47  | 0.38  | 0.31  | 0.25  | 0.4899 | 0.1637 | 0.2986 | 0.0591 cytokine receptor-like factor 2                                   |
| 54394      | Cytl3   | 0.63  | -0.37 | -0.54 | 0.14  | 0.23  | 0.0697 | 0.2655 | 0.3119 | 0.1503 cytokine receptor-like factor 3                                   |
| 54394      | Cytl3   | -0.40 | -0.65 | -0.95 | -0.67 | -0.91 | 0.4599 | 0.5961 | 0.4281 | 0.0010 cytokine receptor-like factor 3                                   |
| 27278      | Cnk     | -0.18 | 0.35  | 0.12  | 0.20  | -0.10 | 0.6872 | 0.0590 | 0.2699 | 0.2765 cytokine-dependent hematopoietic cell linker                      |
| 20430      | Cyfp1   | 0.62  | -0.16 | -0.37 | 0.23  | 0.15  | 0.1452 | 0.3697 | 0.1978 | 0.2442 cytokine-dependent hematopoietic cell linker                      |
| 20430      | Cyfp1   | 0.00  | -0.17 | -0.13 | 0.04  | 0.19  | 0.7028 | 0.6194 | 0.5718 | 0.2346 cytoplasmic FMR1 interacting protein 1                            |
| 76884      | Cyfp2   | 0.58  | 0.01  | 0.00  | 0.50  | 0.45  | 0.1340 | 0.5807 | 0.5363 | 0.1447 cytoplasmic FMR1 interacting protein 1                            |
| 76884      | Cyfp2   | -0.63 | 0.36  | -0.15 | -0.21 | -0.23 | 0.3345 | 0.5807 | 0.5026 | 0.0039 cytoplasmic FMR1 interacting protein 2                            |
| 76884      | Cyfp2   | 0.06  | 0.02  | -0.09 | -0.03 | 0.02  | 0.5748 | 0.4892 | 0.5550 | 0.0789 cytoplasmic FMR1 interacting protein 2                            |
| 105594     | Cyph    | -0.07 | 0.17  | 0.10  | 0.04  | 0.04  | 0.5109 | 0.3370 | 0.5134 | 0.4275 cytoplasmic FMR1 interacting protein 2                            |
| 12877      | Cpeb1   | -0.42 | -0.06 | -0.85 | -1.14 | -1.44 | 0.4016 | 0.6416 | 0.0192 | 0.3644 cytoplasmic polyadrylated homeobox                                |
| 231207     | Cpeb2   | -0.07 | 0.15  | 0.26  | -0.09 | 0.06  | 0.5319 | 0.2777 | 0.1351 | 0.0010 cytoplasmic polyadrylation element binding protein 1              |
| 231207     | Cpeb2   | -0.05 | 0.18  | 0.51  | 0.30  | 0.49  | 0.6063 | 0.0211 | 0.3639 | 0.3055 cytoplasmic polyadrylation element binding protein 2              |
| 231207     | Cpeb2   | 0.06  | 0.34  | 0.04  | 0.12  | 0.03  | 0.4581 | 0.4354 | 0.0732 | 0.3775 cytoplasmic polyadrylation element binding protein 2              |
| 208922     | Cpeb3   | -0.07 | 0.04  | 0.12  | 0.03  | 0.02  | 0.5696 | 0.4318 | 0.4850 | 0.0076 cytoplasmic polyadrylation element binding protein 2              |
| 208922     | Cpeb3   | 0.15  | -0.16 | -0.61 | -0.66 | -0.44 | 0.4249 | 0.1545 | 0.0241 | 0.4387 cytoplasmic polyadrylation element binding protein 3              |
| 67579      | Cpeb4   | -0.48 | 0.46  | 0.98  | 0.28  | 0.44  | 0.4249 | 0.1545 | 0.0241 | 0.0659 cytoplasmic polyadrylation element binding protein 3              |
| 67579      | Cpeb4   | -0.29 | -0.06 | 0.38  | 0.66  | 1.17  | 0.4820 | 0.5356 | 0.1582 | 0.0406 cytoplasmic polyadrylation element binding protein 4              |
| 67579      | Cpeb4   | -0.06 | 0.02  | 0.05  | 0.01  | -0.02 | 0.5411 | 0.5468 | 0.4097 | 0.0001 cytoplasmic polyadrylation element binding protein 4              |
| 67579      | Cpeb4   | -0.12 | 0.70  | 0.65  | -0.23 | -0.03 | 0.6113 | 0.1765 | 0.1766 | 0.4338 cytoplasmic polyadrylation element binding protein 4              |
| 21682      | Tec     | 0.24  | -0.37 | -0.28 | -0.09 | -0.17 | 0.3262 | 0.0680 | 0.0710 | 0.4692 cytoplasmic tyrosine kinase, Dsc28C related (Drosophila)          |
| 21682      | Tec     | 0.06  | -0.44 | -0.03 | -0.35 | -0.17 | 0.6444 | 0.0289 | 0.0876 | 0.2158 cytoplasmic tyrosine kinase, Dsc28C related (Drosophila)          |
| 80986      | Chap2   | 0.12  | 0.03  | 0.09  | 0.05  | 0.15  | 0.4211 | 0.6474 | 0.4288 | 0.0473 cytoskeleton associated protein 2                                 |
| 80986      | Chap2   | 0.12  | -0.08 | 0.05  | -0.06 | 0.15  | 0.4211 | 0.6474 | 0.4288 | 0.1644 cytoskeleton associated protein 2                                 |
| 70466      | Chap2l  | 0.12  | -0.20 | -0.06 | 0.04  | 0.03  | 0.4251 | 0.1919 | 0.5470 | 0.3975 cytoskeleton associated protein 2-like                            |
| 75786      | Chap5   | -0.63 | 0.53  | 0.52  | -0.42 | -0.23 | 0.1361 | 0.0432 | 0.0554 | 0.375 cytoskeleton associated protein 5                                  |
| 75786      | Chap5   | 0.13  | -0.26 | -0.06 | 0.01  | 0.12  | 0.4067 | 0.2237 | 0.6390 | 0.1275 cytoskeleton associated protein 5                                 |
| 75786      | Chap5   | -0.01 | 0.03  | 0.09  | 0.01  | 0.13  | 0.6746 | 0.5589 | 0.5464 | 0.1546 cytoskeleton associated protein 5                                 |
| 216197     | Chap4   | -0.46 | 0.91  | 0.66  | -0.33 | -0.26 | 0.3475 | 0.1120 | 0.1739 | 0.0835 cytoskeleton associated protein 5                                 |
| 26371      | Claa1   | -0.38 | -0.70 | -1.30 | -1.02 | -1.27 | 0.4137 | 0.2825 | 0.0226 | 0.2001 cytosolic iron-sulfur protein assembly 1 homolog (S. cerevisiae)  |
| 26371      | Claa1   | 0.08  | -0.48 | -0.73 | -0.50 | -0.82 | 0.5558 | 0.0195 | 0.0030 | 0.0000 cytosolic iron-sulfur protein assembly 1 homolog (S. cerevisiae)  |
| 54698      | Claem   | 0.16  | 1.74  | 1.64  | 1.55  | 1.88  | 0.5997 | 0.0169 | 0.0155 | 0.0000 cytosolic and regulatory T cell molecule                          |
| 21841      | Tla1    | 0.31  | -0.60 | -1.00 | -0.35 | -0.32 | 0.3368 | 0.0163 | 0.0006 | 0.0732 cytoxic granule-associated RNA binding protein 1                  |
| 21841      | Tla1    | 0.22  | -0.56 | -0.51 | -0.44 | -0.40 | 0.4329 | 0.0128 | 0.0119 | 0.0732 cytoxic granule-associated RNA binding protein 1                  |
| 21841      | Tla1    | 0.23  | -0.61 | -0.64 | -0.56 | -0.50 | 0.4493 | 0.0280 | 0.0172 | 0.0178 cytoxic granule-associated RNA binding protein 1                  |
| 21841      | Tla1    | -0.09 | -0.17 | -0.49 | -0.55 | -0.52 | 0.6217 | 0.2141 | 0.0225 | 0.0047 cytoxic granule-associated RNA binding protein 1                  |
| 13024      | Cla2a   | -0.41 | 0.73  | 0.89  | 0.29  | 0.41  | 0.4066 | 0.2109 | 0.1104 | 0.0046 cytoxic granule-associated RNA binding protein 1                  |
| 13025      | Cla2b   | -0.07 | 0.76  | 0.69  | 0.42  | 0.39  | 0.6587 | 0.2008 | 0.0954 | 0.0675 cytoxic T lymphocyte-associated protein 2 alpha                   |
| 12477      | Cla4    | 0.02  | 0.23  | 0.17  | 0.07  | 0.07  | 0.6651 | 0.2008 | 0.3305 | 0.0284 cytoxic T lymphocyte-associated protein 2 beta                    |
| 13170      | Dhp     | -1.06 | -2.10 | -3.52 | -1.54 | -2.22 | 0.4341 | 0.2702 | 0.0334 | 0.3312 cytoxic T-lymphocyte-associated protein 4                         |
| 98314      | D2hgh   | -0.11 | -0.10 | -0.17 | -0.24 | -0.16 | 0.4826 | 0.3966 | 0.0925 | 0.0004 D-site albumin promoter binding protein                           |
| 98314      | D2hgh   | 0.15  | -0.21 | -0.20 | -0.10 | -0.04 | 0.4875 | 0.1655 | 0.1672 | 0.1404 D-2-hydroxyglutarate dehydrogenase                                |
| 19961      | Dpr1    | -0.44 | 0.66  | 0.16  | -0.16 | -0.16 | 0.2645 | 0.0705 | 0.3455 | 0.3923 D-2-hydroxyglutarate dehydrogenase                                |
| 29708      | Dpr2    | -0.49 | -0.05 | 0.16  | 0.08  | 0.09  | 0.3961 | 0.4443 | 0.4170 | 0.2891 D4, zinc and double PHD fingers family 1                          |
| 77017      | Dpr3    | -0.04 | 0.12  | 0.03  | 0.02  | -0.18 | 0.5883 | 0.6226 | 0.5110 | 0.0468 D4, zinc and double PHD fingers, family 3                         |
| 13134      | Dach1   | 0.41  | -0.05 | -0.39 | -0.38 | -0.24 | 0.3134 | 0.4011 | 0.1435 | 0.1055 dachshund 1 (Drosophila)                                          |
| 13134      | Dach1   | -0.23 | 0.52  | 0.17  | -0.45 | -0.58 | 0.4902 | 0.3544 | 0.6414 | 0.0063 dachshund 1 (Drosophila)                                          |
| 93837      | Dach2   | 0.12  | -0.08 | 0.01  | 0.09  | -0.04 | 0.4129 | 0.4044 | 0.6186 | 0.3558 dachshund 2 (Drosophila)                                          |
| 93837      | Dach2   | 0.04  | 0.03  | 0.03  | -0.01 | 0.05  | 0.6179 | 0.6532 | 0.6324 | 0.3505 dachshund 2 (Drosophila)                                          |
| 233651     | Dchs1   | -0.84 | 0.10  | 0.61  | 0.11  | -0.20 | 0.2487 | 0.0855 | 0.4125 | 0.2559 dachsous 1 (Drosophila)                                           |
| 233651     | Dchs1   | 0.08  | 0.01  | 0.09  | 0.03  | -0.17 | 0.6485 | 0.4251 | 0.5064 | 0.1406 dachsous 1 (Drosophila)                                           |
| 67789      | Dalr3   | -0.28 | -0.28 | -0.27 | -0.41 | -0.54 | 0.3189 | 0.1213 | 0.0465 | 0.0228 DALR antitoxin binding domain containing 3                        |
| 67789      | Dalr3   | 0.17  | -0.33 | -0.13 | 0.29  | 0.32  | 0.5154 | 0.1548 | 0.2386 | 0.1243 DALR antitoxin binding domain containing 3                        |
| 13194      | Ddb1    | -0.04 | 0.13  | 0.77  | 0.74  | 0.94  | 0.6747 | 0.5629 | 0.0878 | 0.0004 damage specific DNA binding protein 1                             |
| 107986     | Ddb2    | 0.22  | -0.46 | -0.55 | 0.02  | -0.07 | 0.4738 | 0.0565 | 0.1012 | 0.4064 damage specific DNA binding protein 2                             |
| 13142      | Dao1    | -0.08 | 0.03  | 0.03  | -0.01 | -0.07 | 0.538  |        |        |                                                                          |

|        |         |       |       |       |       |       |       |        |        |        |        |                                                                                           |
|--------|---------|-------|-------|-------|-------|-------|-------|--------|--------|--------|--------|-------------------------------------------------------------------------------------------|
| 70503  | Ddo     | -0.02 | 0.09  | -0.02 | 0.03  | -0.02 | -0.05 | 0.5023 | 0.4567 | 0.6016 | 0.5019 | 0.3400 D-aspartate oxidase                                                                |
| 70503  | Ddo     | -0.54 | 0.15  | -0.86 | -1.05 | -0.86 | -1.49 | 0.5215 | 0.0593 | 0.0035 | 0.0017 | 0.0000 D-aspartate oxidase                                                                |
| 70503  | Ddo     | -0.02 | 0.54  | 0.79  | 0.51  | 0.69  | 0.51  | 0.6713 | 0.0016 | 0.0002 | 0.0094 | 0.0010 DAZ associated protein 1                                                           |
| 70503  | Dazap1  | -0.35 | -0.10 | 0.13  | 0.12  | 0.13  | 0.38  | 0.5399 | 0.4703 | 0.3183 | 0.2507 | 0.0764 DAZ associated protein 2                                                           |
| 66573  | Dzp1    | -0.38 | -0.05 | -0.57 | -0.12 | -0.16 | -0.39 | 0.3400 | 0.5217 | 0.0415 | 0.2287 | 0.0629 DAZ interacting protein 1                                                          |
| 66573  | Dzp1    | -0.32 | 0.06  | -0.12 | -0.16 | -0.32 | -0.16 | 0.3954 | 0.3538 | 0.5418 | 0.0889 | 0.0500 DAZ interacting protein 1                                                          |
| 66573  | Dzp1    | -0.09 | 0.20  | -0.09 | -0.04 | -0.04 | -0.04 | 0.5418 | 0.1281 | 0.3889 | 0.3235 | 0.4028 DAZ interacting protein 1-like                                                     |
| 72507  | Dzp1l   | -0.23 | 0.51  | 0.14  | 0.14  | -0.20 | -0.08 | 0.3698 | 0.0659 | 0.5899 | 0.1266 | 0.3128 DAZ interacting protein 1-like                                                     |
| 72507  | Dzp1l   | 0.27  | 0.09  | 0.18  | 0.09  | 0.18  | 0.28  | 0.3975 | 0.3543 | 0.6389 | 0.1093 | 0.0165 DAZ interacting protein 1-like                                                     |
| 22470  | Dzp3    | 0.24  | -0.17 | -1.00 | -0.17 | -1.00 | -1.70 | 0.1822 | 0.3272 | 0.4930 | 0.0037 | 0.0000 DAZ interacting protein 3, zinc finger                                             |
| 22470  | Dzp3    | -0.36 | -0.01 | -0.42 | -0.42 | -0.94 | -0.94 | 0.2835 | 0.5244 | 0.0364 | 0.0012 | 0.0003 DAZ interacting protein 3, zinc finger                                             |
| 22470  | Dzp3    | -0.29 | 0.06  | -0.29 | -0.42 | -0.27 | -0.33 | 0.5899 | 0.0891 | 0.0134 | 0.0269 | 0.0029 DAZ interacting protein 3, zinc finger                                             |
| 27214  | Dh4     | 0.31  | 0.67  | 0.69  | 0.31  | 0.67  | 1.06  | 0.1147 | 0.2842 | 0.0095 | 0.0004 | 0.0000 DBF4 homolog (S. cerevisiae)                                                       |
| 27214  | Dh4     | 0.08  | 0.07  | -0.05 | 0.07  | -0.05 | -0.02 | 0.3798 | 0.3672 | 0.4133 | 0.4193 | 0.4535 DBF4 homolog (S. cerevisiae)                                                       |
| 27214  | Dh4     | 0.06  | 0.07  | 0.03  | 0.03  | 0.03  | 0.03  | 0.5630 | 0.4066 | 0.4230 | 0.4823 | 0.4051 DBF4 homolog (S. cerevisiae)                                                       |
| 320685 | Dcd     | 0.06  | 0.06  | 0.00  | 0.02  | -0.05 | 0.03  | 0.6629 | 0.5292 | 0.5730 | 0.3946 | 0.4133 dCMP deaminase                                                                     |
| 320685 | Dcd     | 0.02  | -0.01 | -0.02 | 0.04  | -0.02 | 0.04  | 0.6629 | 0.6545 | 0.6201 | 0.4997 | 0.3572 dCMP deaminase                                                                     |
| 102323 | Dcut1d2 | -0.49 | -1.18 | -1.51 | -1.51 | -0.65 | -0.85 | 0.2133 | 0.0023 | 0.0004 | 0.0043 | 0.0001 DCN1, defective in culin neddylation 1, domain containing 2 (S. cerevisiae)        |
| 102323 | Dcut1d2 | -0.03 | -0.07 | -0.11 | -0.13 | -0.13 | -0.16 | 0.6584 | 0.3291 | 0.2023 | 0.2661 | 0.1164 DCN1, defective in culin neddylation 1, domain containing 2 (S. cerevisiae)        |
| 102323 | Dcut1d2 | -0.08 | -0.92 | -0.87 | -0.87 | 0.32  | -0.55 | 0.6616 | 0.2387 | 0.2348 | 0.4513 | 0.0070 DCN1, defective in culin neddylation 1, domain containing 2 (S. cerevisiae)        |
| 233805 | Dcut1d3 | -0.48 | 0.55  | 0.08  | -0.33 | -0.39 | -0.39 | 0.2150 | 0.0340 | 0.3587 | 0.0608 | 0.0077 DCN1, defective in culin neddylation 1, domain containing 3 (S. cerevisiae)        |
| 233805 | Dcut1d3 | 0.06  | -0.58 | -0.79 | -0.54 | -0.82 | -0.82 | 0.6534 | 0.0513 | 0.0052 | 0.0113 | 0.0028 DCN1, defective in culin neddylation 1, domain containing 3 (S. cerevisiae)        |
| 100737 | Dcut1d4 | 0.37  | -0.62 | -0.38 | 0.15  | 0.27  | 0.27  | 0.1202 | 0.0050 | 0.1078 | 0.2786 | 0.2458 DCN1, defective in culin neddylation 1, domain containing 4 (S. cerevisiae)        |
| 100737 | Dcut1d4 | 0.10  | -0.07 | -0.07 | -0.07 | -0.13 | -0.07 | 0.5597 | 0.5848 | 0.3014 | 0.1584 | 0.0077 DCN1, defective in culin neddylation 1, domain containing 4 (S. cerevisiae)        |
| 76863  | Dcut1d5 | 0.52  | -0.54 | -0.02 | 0.21  | 0.45  | 0.45  | 0.2287 | 0.0599 | 0.4890 | 0.2199 | 0.0000 DCN1, defective in culin neddylation 1, domain containing 5 (S. cerevisiae)        |
| 76863  | Dcut1d5 | 0.39  | 0.06  | 0.38  | 0.40  | 1.21  | 0.59  | 0.2776 | 0.5888 | 0.4886 | 0.1232 | 0.0019 DCP1 decapping enzyme homolog A (S. cerevisiae)                                    |
| 75901  | Dcp1a   | 0.43  | -0.36 | 0.00  | 0.02  | 0.24  | 0.24  | 0.2542 | 0.1330 | 0.5388 | 0.2000 | 0.2521 DCP1 decapping enzyme homolog A (S. cerevisiae)                                    |
| 75901  | Dcp1a   | -0.06 | -0.01 | 0.02  | -0.12 | -0.08 | -0.08 | 0.5770 | 0.6532 | 0.5471 | 0.2317 | 0.4798 DCP1 decapping enzyme homolog b (S. cerevisiae)                                    |
| 70940  | Dcp1b   | -0.57 | -0.30 | -0.43 | 0.01  | -0.01 | -0.01 | 0.6433 | 0.5646 | 0.6034 | 0.5555 | 0.0000 DCP2 decapping enzyme homolog (S. cerevisiae)                                      |
| 70940  | Dcp1b   | -0.09 | 0.74  | 1.03  | 0.37  | 0.94  | 0.94  | 0.6076 | 0.0985 | 0.0107 | 0.0228 | 0.0000 DCP2 decapping enzyme homolog (S. cerevisiae)                                      |
| 70940  | Dcp2    | -0.03 | -0.11 | -0.21 | -0.22 | -0.13 | -0.13 | 0.6546 | 0.3420 | 0.1216 | 0.0342 | 0.1730 DCP2 decapping enzyme homolog (S. cerevisiae)                                      |
| 77772  | Dcs1    | -0.02 | -0.01 | 0.16  | -0.05 | -0.04 | -0.04 | 0.4911 | 0.6076 | 0.6127 | 0.5206 | 0.1664 DC-STAMP domain containing 1                                                       |
| 77772  | Dcs1    | 0.00  | 0.14  | 0.15  | -0.02 | -0.01 | -0.01 | 0.6954 | 0.4952 | 0.3691 | 0.3879 | 0.3445 DC-STAMP domain containing 1                                                       |
| 77772  | Dcs1    | 0.05  | 0.16  | -0.01 | 0.05  | -0.03 | -0.03 | 0.5276 | 0.6462 | 0.3206 | 0.5504 | 0.3992 DC-STAMP domain containing 2                                                       |
| 329702 | Dcs2    | -0.08 | 0.05  | 0.06  | 0.16  | -0.01 | 0.76  | 0.1157 | 0.0715 | 0.1912 | 0.4376 | 0.0009 DCUNT1 DCN1, defective in culin neddylation 1, domain containing 1 (S. cerevisiae) |
| 114893 | Dcut1d1 | 0.71  | -0.68 | -0.36 | 0.07  | 0.32  | 0.30  | 0.6876 | 0.6324 | 0.4234 | 0.0426 | 0.0006 DCUNT1 DCN1, defective in culin neddylation 1, domain containing 1 (S. cerevisiae) |
| 114893 | Dcut1d1 | 0.38  | 0.17  | 0.32  | 0.30  | 0.68  | 0.68  | 0.2694 | 0.6984 | 0.3723 | 0.1594 | 0.0292 DCUNT1 DCN1, defective in culin neddylation 1, domain containing 1 (S. cerevisiae) |
| 114893 | Dcut1d1 | 0.00  | 0.07  | -0.11 | -0.24 | -0.29 | -0.29 | 0.6884 | 0.1127 | 0.1843 | 0.1245 | 0.4928 DDHD domain containing 1                                                           |
| 114874 | Dhd1    | -0.45 | -0.19 | -0.21 | 0.14  | 0.00  | 0.00  | 0.4710 | 0.3032 | 0.1919 | 0.0015 | 0.0012 DDHD domain containing 1                                                           |
| 114874 | Dhd1    | 0.19  | 0.41  | 0.50  | 0.53  | 0.70  | 0.70  | 0.4710 | 0.3032 | 0.1919 | 0.0015 | 0.3810 DDHD domain containing 1                                                           |
| 72108  | Dhd1    | -0.14 | -0.01 | -0.07 | -0.01 | -0.07 | -0.05 | 0.5002 | 0.6285 | 0.4457 | 0.4043 | 0.0001 DDHD domain containing 2                                                           |
| 72108  | Dhd2    | -1.12 | -0.01 | -0.70 | -0.70 | -1.37 | -1.37 | 0.3750 | 0.2616 | 0.1132 | 0.4481 | 0.1487 DDHD domain containing 2                                                           |
| 72108  | Dhd2    | -0.11 | 0.15  | 0.18  | 0.04  | 0.04  | 0.09  | 0.4488 | 0.0328 | 0.0150 | 0.0026 | 0.0001 DDHD domain containing 2                                                           |
| 72108  | Dhd2    | 0.19  | -0.51 | -0.65 | -0.42 | -0.62 | -0.62 | 0.4488 | 0.0328 | 0.0150 | 0.0026 | 0.4046 Ddi1, DNA-damage inducible 1, homolog 1 (S. cerevisiae)                            |
| 71929  | Ddi1    | -0.23 | 0.03  | 0.05  | 0.00  | 0.02  | 0.02  | 0.6159 | 0.5309 | 0.5086 | 0.5627 | 0.0100 D-dopachrome tautomerase                                                           |
| 13202  | Ddt     | -0.22 | -0.52 | -0.58 | -0.38 | -0.52 | -0.52 | 0.3537 | 0.0065 | 0.0159 | 0.0448 | 0.0259 DEAD (Asp-Glu-Ala-Asp) box polypeptide 1                                           |
| 104721 | Ddx1    | -0.82 | 1.16  | 0.36  | -0.80 | -0.92 | -0.92 | 0.3221 | 0.2306 | 0.6026 | 0.0742 | 0.1765 DEAD (Asp-Glu-Ala-Asp) box polypeptide 1                                           |
| 104721 | Ddx1    | -0.80 | 0.15  | 0.38  | 0.17  | -0.11 | -0.11 | 0.4441 | 0.3478 | 0.2353 | 0.1025 | 0.2469 DEAD (Asp-Glu-Ala-Asp) box polypeptide 10                                          |
| 77591  | Ddx10   | 0.36  | 0.43  | 0.03  | 0.03  | 0.15  | -0.11 | 0.2914 | 0.3087 | 0.5150 | 0.3426 | 0.0051 DEAD (Asp-Glu-Ala-Asp) box polypeptide 10                                          |
| 77591  | Ddx10   | 0.00  | 0.31  | -0.23 | -0.53 | -0.58 | -0.58 | 0.7034 | 0.5771 | 0.1776 | 0.0193 | 0.0237 DEAD (Asp-Glu-Ala-Asp) box polypeptide 17                                          |
| 67040  | Ddx17   | -0.14 | -0.04 | -0.27 | -0.16 | -0.25 | -0.25 | 0.5238 | 0.5199 | 0.4604 | 0.1171 | 0.0013 DEAD (Asp-Glu-Ala-Asp) box polypeptide 17                                          |
| 67040  | Ddx17   | 0.10  | -0.52 | -0.64 | -0.32 | -0.79 | -0.79 | 0.6003 | 0.0380 | 0.0088 | 0.1309 | 0.2154 DEAD (Asp-Glu-Ala-Asp) box polypeptide 17                                          |
| 66942  | Ddx18   | -0.40 | -0.31 | -0.24 | -0.05 | 0.22  | 0.22  | 0.3134 | 0.1413 | 0.1348 | 0.5106 | 0.0100 DEAD (Asp-Glu-Ala-Asp) box polypeptide 18                                          |
| 13680  | Ddx19a  | 0.18  | 0.05  | 0.33  | 0.24  | 0.34  | 0.34  | 0.4776 | 0.5470 | 0.3857 | 0.1120 | 0.2663 DEAD (Asp-Glu-Ala-Asp) box polypeptide 19a                                         |
| 13680  | Ddx19a  | 0.02  | 0.15  | 0.23  | 0.23  | -0.06 | -0.10 | 0.6854 | 0.6310 | 0.5251 | 0.4374 | 0.0040 DEAD (Asp-Glu-Ala-Asp) box polypeptide 19a                                         |
| 234733 | Ddx19b  | 0.07  | 0.73  | 0.59  | 0.40  | 0.63  | 0.63  | 0.6336 | 0.1123 | 0.1522 | 0.0125 | 0.0050 DEAD (Asp-Glu-Ala-Asp) box polypeptide 19b                                         |
| 234733 | Ddx19b  | 0.02  | 0.13  | 0.01  | -0.08 | -0.26 | -0.26 | 0.6847 | 0.5904 | 0.4192 | 0.4384 | 0.0028 DEAD (Asp-Glu-Ala-Asp) box polypeptide 20                                          |
| 53975  | Ddx20   | -0.49 | -0.14 | 0.11  | 0.11  | 0.07  | 0.50  | 0.5075 | 0.4990 | 0.3320 | 0.4184 | 0.0630 DEAD (Asp-Glu-Ala-Asp) box polypeptide 21                                          |
| 56200  | Ddx21   | 0.34  | -0.20 | 0.06  | 0.13  | 0.21  | 0.21  | 0.2171 | 0.2020 | 0.5568 | 0.0956 | 0.0520 DEAD (Asp-Glu-Ala-Asp) box polypeptide 21                                          |
| 56200  | Ddx21   | -0.45 | 1.13  | 0.73  | 0.73  | -0.59 | -0.48 | 0.3945 | 0.0911 | 0.2547 | 0.0459 | 0.0340 DEAD (Asp-Glu-Ala-Asp) box polypeptide 21                                          |
| 56200  | Ddx21   | -0.27 | 0.21  | 0.34  | 0.04  | 0.14  | 0.16  | 0.4652 | 0.2249 | 0.1128 | 0.4668 | 0.1244 DEAD (Asp-Glu-Ala-Asp) box polypeptide 21                                          |
| 74351  | Ddx23   | -0.90 | 0.245 | 1.43  | -0.64 | -0.56 | -0.56 | 0.3005 | 0.0123 | 0.0814 | 0.1602 | 0.3939 DEAD (Asp-Glu-Ala-Asp) box polypeptide 23                                          |
| 74351  | Ddx23   | -0.05 | 0.54  | 0.27  | 0.07  | 0.07  | 0.05  | 0.6508 | 0.1548 | 0.5076 | 0.3971 | 0.4758 DEAD (Asp-Glu-Ala-Asp) box polypeptide 23                                          |
| 27225  | Ddx24   | -0.81 | 1.77  | 1.56  | 0.19  | 0.02  | 0.02  | 0.2808 | 0.0568 | 0.0454 | 0.4024 | 0.0010 DEAD (Asp-Glu-Ala-Asp) box polypeptide 24                                          |
| 27225  | Ddx24   | -0.25 | 0.15  | 0.82  | 0.63  | 0.76  | 0.76  | 0.3289 | 0.5354 | 0.0496 | 0.0131 | 0.0959 DEAD (Asp-Glu-Ala-Asp) box polypeptide 24                                          |
| 30959  | Ddx25   | -1.73 | 4.43  | 2.79  | -1.42 | -1.85 | -1.85 | 0.3904 | 0.1012 | 0.0731 | 0.2284 | 0.4903 DEAD (Asp-Glu-Ala-Asp) box polypeptide 25                                          |
| 30959  | Ddx25   | -0.01 | -0.05 | -0.06 | -0.06 | -0.08 | 0.00  | 0.6638 | 0.6267 | 0.5690 | 0.1916 | 0.0959 DEAD (Asp-Glu-Ala-Asp) box polypeptide 25                                          |
| 228989 | Ddx27   | 0.37  | 0.37  | 0.33  | 0.27  | 0.33  | 0.27  | 0.3288 | 0.4522 | 0.4842 | 0.1370 | 0.0012 DEAD (Asp-Glu-Ala-Asp) box polypeptide 27                                          |
| 228989 | Ddx27   | 0.05  | 0.08  | 0.08  | 0.08  | -0.02 | 0.06  | 0.6102 | 0.6509 | 0.6415 | 0.5099 | 0.0332 DEAD (Asp-Glu-Ala-Asp) box polypeptide 27                                          |
| 228989 | Ddx27   | -0.36 | -0.24 | 0.20  | 0.29  | 0.44  | 0.44  | 0.5033 | 0.5727 | 0.2546 | 0.1201 | 0.2979 DEAD (Asp-Glu-Ala-Asp) box polypeptide 28                                          |
| 26900  | Ddx3y   | -0.01 | -0.06 | -0.01 | -0.07 | -0.04 | -0.05 | 0.6699 | 0.5885 | 0.6382 | 0.2955 | 0.3840 DEAD (Asp-Glu-Ala-Asp) box polypeptide 3, Y-linked                                 |
| 26900  | Ddx3y   | -0.01 | 0.01  | -0.07 | -0.04 | -0.04 | -0.04 | 0.6753 | 0.5892 | 0.4542 | 0.4888 | 0.3844 DEAD (Asp-Glu-Ala-Asp) box polypeptide 3, Y-linked                                 |
| 68278  | Ddx39   | -0.38 | -0.01 | 0.03  | -0.07 | -0.07 | -0.07 | 0.3407 | 0.5287 | 0.5582 | 0.2589 | 0.1953 DEAD (Asp-Glu-Ala-Asp) box polypeptide 39                                          |
| 13206  | Ddx4    | 0.25  | -0.14 | -0.17 | -0.08 | -0.08 | -0.08 | 0.1717 | 0.2509 | 0.2509 | 0.2589 | 0.2909 DEAD (Asp-G                                                                        |

|        |        |       |       |       |       |       |        |        |        |        |                                                                                                 |
|--------|--------|-------|-------|-------|-------|-------|--------|--------|--------|--------|-------------------------------------------------------------------------------------------------|
| 52513  | Ddx56  | 0.02  | 0.09  | -0.38 | -0.39 | -0.71 | 0.6859 | 0.5639 | 0.0988 | 0.0324 | 0.0005 DEAD (Asp-Glu-Ala-Asp) box polypeptide 56                                                |
| 230073 | Ddx58  | 0.45  | -0.37 | -0.06 | 0.26  | 0.40  | 0.1887 | 0.0784 | 0.4989 | 0.2496 | 0.0437 DEAD (Asp-Glu-Ala-Asp) box polypeptide 58                                                |
| 230073 | Ddx58  | -0.07 | 0.19  | 0.07  | -0.05 | -0.03 | 0.5455 | 0.2980 | 0.5457 | 0.4012 | 0.3909 DEAD (Asp-Glu-Ala-Asp) box polypeptide 58                                                |
| 230073 | Ddx58  | -0.20 | 0.26  | -0.36 | -0.96 | -1.06 | 0.6062 | 0.6397 | 0.2154 | 0.0054 | 0.0014 DEAD (Asp-Glu-Ala-Asp) box polypeptide 58                                                |
| 67997  | Ddx59  | 0.01  | 0.04  | -0.19 | -0.29 | -0.38 | 0.5383 | 0.5383 | 0.1913 | 0.0741 | 0.0019 DEAD (Asp-Glu-Ala-Asp) box polypeptide 59                                                |
| 67997  | Ddx59  | 0.12  | 0.08  | 0.07  | 0.14  | 0.24  | 0.3490 | 0.4846 | 0.4611 | 0.0639 | 0.0066 DEAD (Asp-Glu-Ala-Asp) box polypeptide 59                                                |
| 13209  | Ddx59  | 0.22  | -0.26 | -0.42 | -0.08 | -0.21 | 0.4298 | 0.0963 | 0.0416 | 0.4225 | 0.1467 DEAD (Asp-Glu-Ala-Asp) box polypeptide 59                                                |
| 234311 | Ddx6   | -0.61 | 0.78  | 0.44  | -0.87 | -0.75 | 0.2946 | 0.1066 | 0.2417 | 0.0242 | 0.0182 DEAD (Asp-Glu-Ala-Asp) box polypeptide 6                                                 |
| 234311 | Ddx60  | -0.25 | -0.08 | 0.01  | -0.14 | -0.12 | 0.1881 | 0.6358 | 0.4063 | 0.0950 | 0.0755 DEAD (Asp-Glu-Ala-Asp) box polypeptide 6                                                 |
| 234311 | Ddx60  | -0.03 | 0.11  | -0.19 | -0.31 | -0.36 | 0.6677 | 0.6518 | 0.1243 | 0.0594 | 0.0202 DEAD (Asp-Glu-Ala-Asp) box polypeptide 60                                                |
| 213236 | Ddx1   | -0.05 | -0.24 | -0.50 | -0.45 | -0.54 | 0.7020 | 0.1716 | 0.0760 | 0.0049 | 0.0002 dead end homolog 1 (zebrafish)                                                           |
| 320209 | Ddx11  | -0.05 | 0.00  | -0.10 | -0.07 | -0.16 | 0.5860 | 0.6122 | 0.3756 | 0.3610 | 0.0978 DEADH (Asp-Glu-Ala-AspHis) box polypeptide 11 (CHL1-like helicase homolog S. cerevisiae) |
| 236790 | Ddx26b | 0.37  | -0.78 | -1.06 | -0.29 | -0.37 | 0.3337 | 0.0096 | 0.0008 | 0.2483 | 0.1873 DEADH (Asp-Glu-Ala-AspHis) box polypeptide 26B                                           |
| 236790 | Ddx26b | 0.25  | 0.02  | -0.22 | -0.31 | -0.15 | 0.3367 | 0.5184 | 0.1891 | 0.0857 | 0.1671 DEADH (Asp-Glu-Ala-AspHis) box polypeptide 26B                                           |
| 236790 | Ddx26b | 0.09  | 0.00  | -0.04 | 0.04  | 0.07  | 0.4506 | 0.5787 | 0.3681 | 0.4200 | 0.0453 DEADH (Asp-Glu-Ala-AspHis) box polypeptide 26B                                           |
| 236790 | Ddx26b | 0.17  | -0.50 | -0.44 | -0.44 | -0.34 | 0.5692 | 0.0851 | 0.0820 | 0.0286 | 0.0033 DEADH (Asp-Glu-Ala-AspHis) box polypeptide 26B                                           |
| 13205  | Ddx3x  | 0.58  | 0.12  | 0.56  | 0.69  | 1.37  | 0.1632 | 0.0647 | 0.3195 | 0.0134 | 0.0043 DEADH (Asp-Glu-Ala-AspHis) box polypeptide 3, X-linked                                   |
| 13205  | Ddx3x  | -0.61 | 1.43  | 1.23  | 0.17  | 0.73  | 0.2713 | 0.0036 | 0.0063 | 0.3584 | 0.0106 DEADH (Asp-Glu-Ala-AspHis) box polypeptide 3, X-linked                                   |
| 227674 | Ddx31  | -0.18 | 0.12  | -0.25 | -0.48 | -0.08 | 0.6272 | 0.6176 | 0.1436 | 0.0144 | 0.1424 deafness, autosomal dominant 5 homolog (human)                                           |
| 54722  | Dhx5h  | 0.04  | 0.03  | -0.09 | 0.03  | 0.08  | 0.3072 | 0.6266 | 0.2184 | 0.4600 | 0.1170 deafness, autosomal dominant 5 homolog (human)                                           |
| 54722  | Dhx5h  | -0.48 | 0.24  | 0.43  | 0.08  | 0.12  | 0.3856 | 0.2239 | 0.0787 | 0.4818 | 0.0860 deafness, autosomal dominant 5 homolog (human)                                           |
| 54722  | Dhx5h  | 0.05  | 0.12  | 0.12  | 0.12  | 0.08  | 0.5559 | 0.3023 | 0.3420 | 0.2666 | 0.4185 deafness, autosomal dominant 5 homolog (human)                                           |
| 106794 | Dhx57  | 0.06  | 0.07  | 0.11  | 0.16  | -0.03 | 0.5880 | 0.6221 | 0.0807 | 0.0053 | 0.0002 DEAH (Asp-Glu-Ala-AspHis) box polypeptide 57                                             |
| 106794 | Dhx57  | 0.12  | -0.53 | -0.98 | -0.48 | -0.67 | 0.5223 | 0.0390 | 0.0767 | 0.1111 | 0.0021 DEAH (Asp-Glu-Ala-AspHis) box polypeptide 15                                             |
| 13204  | Dhx15  | 0.88  | -0.90 | 0.13  | 0.57  | 1.15  | 0.1519 | 0.0767 | 0.6273 | 0.1111 | 0.0059 DEAH (Asp-Glu-Ala-His) box polypeptide 15                                                |
| 13204  | Dhx15  | 0.69  | -0.87 | 0.02  | 0.65  | 1.04  | 0.2293 | 0.1384 | 0.0896 | 0.5043 | 0.0021 DEAH (Asp-Glu-Ala-His) box polypeptide 15                                                |
| 69192  | Dhx16  | -0.85 | 0.20  | 0.15  | -0.04 | -0.14 | 0.3945 | 0.3182 | 0.3148 | 0.5138 | 0.2622 DEAH (Asp-Glu-Ala-His) box polypeptide 16                                                |
| 69192  | Dhx29  | -0.21 | 0.24  | -0.11 | -0.41 | -0.45 | 0.4478 | 0.3777 | 0.3868 | 0.0508 | 0.0117 DEAH (Asp-Glu-Ala-His) box polypeptide 16                                                |
| 218629 | Dhx29  | -0.38 | -0.29 | -0.23 | -0.44 | -0.51 | 0.4122 | 0.3896 | 0.6283 | 0.0150 | 0.0021 DEAH (Asp-Glu-Ala-His) box polypeptide 29                                                |
| 218629 | Dhx29  | 0.07  | -0.28 | -0.37 | -0.21 | -0.36 | 0.5874 | 0.2016 | 0.0197 | 0.1499 | 0.0119 DEAH (Asp-Glu-Ala-His) box polypeptide 29                                                |
| 72831  | Dhx30  | -0.33 | -0.26 | -0.14 | -0.33 | -0.40 | 0.2466 | 0.3817 | 0.2790 | 0.0104 | 0.0100 DEAH (Asp-Glu-Ala-His) box polypeptide 30                                                |
| 101437 | Dhx32  | 0.87  | 0.72  | -0.13 | 0.41  | 0.96  | 0.1816 | 0.0718 | 0.4108 | 0.2252 | 0.0040 DEAH (Asp-Glu-Ala-His) box polypeptide 32                                                |
| 216877 | Dhx33  | -0.54 | -0.40 | -0.25 | 0.03  | 0.01  | 0.1127 | 0.0563 | 0.0881 | 0.5043 | 0.4781 DEAH (Asp-Glu-Ala-His) box polypeptide 33                                                |
| 216877 | Dhx33  | 0.21  | 0.09  | -0.40 | -0.01 | -0.02 | 0.2575 | 0.3896 | 0.6051 | 0.5489 | 0.4899 DEAH (Asp-Glu-Ala-His) box polypeptide 33                                                |
| 71723  | Dhx34  | -0.04 | -0.01 | 0.05  | 0.15  | 0.00  | 0.5604 | 0.6415 | 0.3095 | 0.5128 | 0.4908 DEAH (Asp-Glu-Ala-His) box polypeptide 34                                                |
| 71723  | Dhx34  | -0.18 | -0.29 | -0.05 | 0.10  | -0.27 | 0.4763 | 0.5650 | 0.1696 | 0.2374 | 0.0155 DEAH (Asp-Glu-Ala-His) box polypeptide 34                                                |
| 71715  | Dhx35  | -0.09 | 0.15  | 0.35  | 0.10  | 0.24  | 0.4994 | 0.4746 | 0.1699 | 0.0561 | 0.0096 DEAH (Asp-Glu-Ala-His) box polypeptide 34                                                |
| 72162  | Dhx36  | -0.42 | 0.22  | 0.39  | -0.17 | 0.40  | 0.4373 | 0.2672 | 0.1303 | 0.3174 | 0.0377 DEAH (Asp-Glu-Ala-His) box polypeptide 35                                                |
| 72162  | Dhx36  | 0.25  | 0.32  | 0.54  | 0.32  | 0.72  | 0.4918 | 0.5649 | 0.5433 | 0.1162 | 0.0001 DEAH (Asp-Glu-Ala-His) box polypeptide 36                                                |
| 208144 | Dhx37  | 0.05  | 0.06  | -0.02 | 0.16  | 0.00  | 0.5807 | 0.5556 | 0.5433 | 0.1162 | 0.0001 DEAH (Asp-Glu-Ala-His) box polypeptide 36                                                |
| 64340  | Dhx38  | 0.21  | 0.52  | 0.98  | 0.93  | 1.63  | 0.5271 | 0.3595 | 0.0753 | 0.0009 | 0.0000 DEAH (Asp-Glu-Ala-His) box polypeptide 37                                                |
| 64340  | Dhx38  | 0.04  | 0.22  | 0.15  | 0.05  | 0.18  | 0.6322 | 0.2775 | 0.4798 | 0.4386 | 0.1040 DEAH (Asp-Glu-Ala-His) box polypeptide 38                                                |
| 67487  | Dhx40  | 0.52  | -0.48 | -0.05 | 0.20  | 0.69  | 0.2684 | 0.0477 | 0.5016 | 0.3769 | 0.0112 DEAH (Asp-Glu-Ala-His) box polypeptide 38                                                |
| 67487  | Dhx40  | 0.37  | -0.06 | 0.36  | 0.44  | 0.62  | 0.2867 | 0.3897 | 0.2391 | 0.0429 | 0.0026 DEAH (Asp-Glu-Ala-His) box polypeptide 40                                                |
| 217207 | Dhx8   | 0.29  | -0.05 | 0.60  | 0.52  | 0.78  | 0.2705 | 0.4952 | 0.0135 | 0.0190 | 0.0001 DEAH (Asp-Glu-Ala-His) box polypeptide 8                                                 |
| 217207 | Dhx8   | 0.18  | -0.05 | -0.03 | 0.02  | 0.07  | 0.4460 | 0.3551 | 0.3511 | 0.5223 | 0.3014 DEAH (Asp-Glu-Ala-His) box polypeptide 8                                                 |
| 13211  | Dhx9   | 0.09  | 0.29  | 0.22  | 0.23  | 0.46  | 0.4194 | 0.193  | 0.0866 | 0.0640 | 0.0001 DEAH (Asp-Glu-Ala-His) box polypeptide 9                                                 |
| 93838  | Dqx1   | 0.06  | 0.03  | -0.04 | 0.05  | -0.41 | 0.6794 | 0.4907 | 0.4938 | 0.0845 | 0.0183 DEAH (Asp-Glu-Ala-His) box polypeptide 9                                                 |
| 65111  | Dap3   | -0.59 | -0.07 | -0.28 | -0.42 | -0.46 | 0.5434 | 0.6415 | 0.4870 | 0.3019 | 0.3462 DEAH RNA-dependent ATPase                                                                |
| 65111  | Dap3   | 0.12  | 0.02  | -0.17 | 0.03  | 0.07  | 0.4624 | 0.5033 | 0.4152 | 0.0144 | 0.1017 death associated protein 3                                                               |
| 69635  | DapK1  | 0.57  | 1.10  | 1.15  | 1.00  | 1.56  | 0.2866 | 0.0700 | 0.0585 | 0.0007 | 0.2408 death associated protein 3                                                               |
| 69635  | DapK1  | -0.03 | 0.11  | 0.26  | 0.09  | -0.03 | 0.3718 | 0.0782 | 0.2348 | 0.0078 | 0.0000 death associated protein kinase 1                                                        |
| 69635  | DapK1  | -0.01 | 0.12  | 0.12  | 0.07  | 0.13  | 0.6801 | 0.3430 | 0.2865 | 0.3210 | 0.4032 death associated protein kinase 1                                                        |
| 76747  | Dap1   | 0.30  | 0.35  | -0.33 | 0.36  | -0.25 | 0.4353 | 0.5378 | 0.1115 | 0.2279 | 0.1063 death associated protein kinase 1                                                        |
| 76747  | Dap1   | 0.29  | -0.32 | -0.07 | 0.33  | 0.48  | 0.3655 | 0.3179 | 0.5999 | 0.1365 | 0.0285 death associated protein-like 1                                                          |
| 67379  | Dedd1  | 0.46  | 0.04  | 0.39  | 0.62  | 1.07  | 0.1367 | 0.5879 | 0.1385 | 0.0055 | 0.0191 death effector domain-containing                                                         |
| 67379  | Dedd2  | 0.09  | 0.43  | 0.94  | 0.59  | 1.07  | 0.6244 | 0.4095 | 0.0398 | 0.0145 | 0.0000 death effector domain-containing DNA binding protein 2                                   |
| 67379  | Dedd2  | 0.05  | 0.39  | 0.40  | 0.36  | 0.64  | 0.6291 | 0.2223 | 0.1251 | 0.0044 | 0.0001 death effector domain-containing DNA binding protein 2                                   |
| 67379  | Dedd2  | 0.02  | -0.05 | -0.01 | 0.02  | 0.12  | 0.6703 | 0.6120 | 0.5222 | 0.4814 | 0.0001 death effector domain-containing DNA binding protein 2                                   |
| 23856  | Dido1  | 0.47  | 0.46  | 1.00  | 0.79  | 1.73  | 0.1066 | 0.2096 | 0.0042 | 0.0001 | 0.1104 death effector domain-containing DNA binding protein 2                                   |
| 23856  | Dido1  | -0.49 | 0.30  | 0.63  | 0.04  | 0.44  | 0.2259 | 0.1184 | 0.0104 | 0.5101 | 0.0000 death inducer-oblierator 1                                                               |
| 23856  | Dido1  | 0.22  | -0.40 | -0.68 | -0.33 | -0.77 | 0.4899 | 0.1468 | 0.0453 | 0.1928 | 0.0008 death inducer-oblierator 1                                                               |
| 23856  | Dido1  | 0.03  | -0.04 | 0.11  | 0.01  | 0.00  | 0.6116 | 0.5218 | 0.3654 | 0.5414 | 0.4798 death inducer-oblierator 1                                                               |
| 13143  | DapK2  | 0.16  | -0.14 | -0.72 | -0.10 | -0.04 | 0.6217 | 0.3052 | 0.4389 | 0.2007 | 0.3960 death inducer-oblierator 1                                                               |
| 13144  | DapK3  | 0.25  | -0.20 | -0.15 | 0.18  | 0.14  | 0.5354 | 0.2645 | 0.0057 | 0.5210 | 0.3053 death-associated kinase 2                                                                |
| 223453 | Dap    | 0.38  | -0.06 | 0.08  | 0.34  | 0.43  | 0.3465 | 0.1943 | 0.3296 | 0.2023 | 0.1367 death-associated kinase 3                                                                |
| 223453 | Dap    | -0.39 | -0.24 | 0.02  | 0.38  | 0.22  | 0.5766 | 0.5044 | 0.3780 | 0.0362 | 0.0155 death-associated protein                                                                 |
| 83703  | Dbr1   | 0.31  | 0.52  | 0.51  | 0.14  | 0.52  | 0.4199 | 0.3371 | 0.3021 | 0.3545 | 0.2568 death-associated protein                                                                 |
| 69305  | Dcps   | -0.88 | 0.33  | -0.07 | -0.08 | -0.16 | 0.2125 | 0.2486 | 0.3483 | 0.0553 | 0.0023 debranching enzyme homolog 1 (S. cerevisiae)                                             |
| 13137  | Daf2   | -0.07 | 0.03  | 0.14  | -0.43 | -0.06 | 0.5257 | 0.4372 | 0.4590 | 0.2269 | 0.0027 decapping enzyme, scavenger                                                              |
| 13137  | Daf2   | 0.00  | -0.06 | -0.05 | -0.05 | -0.06 | 0.6964 | 0.4477 | 0.3359 | 0.3477 | 0.0710 decay accelerating factor 2                                                              |
| 13179  | Dcn    | 0.56  | -0.64 | -0.28 | 0.00  | 0.00  | 0.2300 | 0.0627 | 0.1640 | 0.5622 | 0.2849 decay accelerating factor 2                                                              |
| 13179  | Dcn    | 0.06  | -0.02 | -0.04 | 0.01  | 0.05  | 0.5021 | 0.5712 | 0.4606 | 0.5246 | 0.4920 decorm                                                                                   |
| 330662 | Dook1  | 0.40  | -0.04 | 0.13  | 0.21  | 0.57  | 0.3317 | 0.4240 | 0.5907 | 0.1123 | 0.2975 decorm                                                                                   |
| 330662 | Dook1  | 0.14  | 0.13  | 0.28  | 0.05  | 0.21  | 0.3961 | 0.5566 | 0.1366 | 0.3969 | 0.0003 dedicator of cytokinesis 1                                                               |
| 330662 | Dook1  | 0.30  | -0.02 | 0.26  | 0.26  | 0.66  | 0.4029 | 0.5803 | 0.4362 | 0.0812 | 0.0824 dedicator of cytokinesis 1                                                               |
| 330662 | Dook1  | 0.19  | -0.14 | 0.02  | -0.08 | 0.03  | 0.4211 | 0.1931 | 0.4945 | 0.3853 | 0.0034 dedicator of cytokinesis 1                                                               |
| 210293 | Dook10 | 0.41  | -0.13 | -0.50 | -0.04 | -0.37 | 0.2261 | 0.2572 | 0.0127 | 0.5299 | 0.4428 dedicator of cytokinesis 1                                                               |
| 210293 | Dook10 | 0.25  | -0.18 | -0.06 | 0.05  | 0.17  | 0.2328 | 0.1088 | 0.282  |        |                                                                                                 |

|           |           |       |       |       |       |       |        |        |        |        |        |                                                                  |
|-----------|-----------|-------|-------|-------|-------|-------|--------|--------|--------|--------|--------|------------------------------------------------------------------|
| 238130    | Dook4     | -0.14 | 0.33  | 0.22  | 0.44  | 0.12  | 0.4506 | 0.0270 | 0.0353 | 0.0267 | 0.2980 | dedicator of cytokinesis 4                                       |
| 238130    | Dook4     | -0.15 | 0.28  | 0.15  | -0.38 | -1.06 | 0.6581 | 0.3021 | 0.3439 | 0.2016 | 0.0012 | dedicator of cytokinesis 4                                       |
| 238130    | Dook4     | -0.02 | 0.28  | 0.84  | 0.44  | 0.49  | 0.6717 | 0.3073 | 0.0104 | 0.0132 | 0.0010 | dedicator of cytokinesis 4                                       |
| 238130    | Dook4     | 0.02  | -0.13 | -0.39 | -0.47 | -0.53 | 0.2654 | 0.2654 | 0.0307 | 0.0439 | 0.0047 | dedicator of cytokinesis 4                                       |
| 68813     | Dook5     | -0.44 | 0.42  | 0.08  | -0.19 | -0.39 | 0.1053 | 0.0570 | 0.2795 | 0.1961 | 0.0056 | dedicator of cytokinesis 5                                       |
| 68813     | Dook5     | 0.05  | 0.21  | 0.19  | 0.27  | 0.27  | 0.6401 | 0.4862 | 0.5094 | 0.1217 | 0.0212 | dedicator of cytokinesis 5                                       |
| 68813     | Dook5     | 0.05  | 0.10  | -0.03 | 0.23  | 0.18  | 0.6528 | 0.6120 | 0.4626 | 0.2441 | 0.2460 | dedicator of cytokinesis 5                                       |
| 68813     | Dook5     | -0.01 | 0.17  | -0.18 | -0.12 | -0.15 | 0.6971 | 0.6456 | 0.1776 | 0.2325 | 0.1964 | dedicator of cytokinesis 5                                       |
| 319899    | Dook6     | -0.18 | 0.58  | -0.04 | -0.06 | -0.09 | 0.2428 | 0.3984 | 0.5548 | 0.3866 | 0.2135 | dedicator of cytokinesis 6                                       |
| 319899    | Dook6     | 0.27  | 0.01  | 0.54  | 1.00  | 1.12  | 0.4310 | 0.2548 | 0.1162 | 0.0005 | 0.0000 | dedicator of cytokinesis 6                                       |
| 319899    | Dook6     | -0.07 | 0.02  | 0.07  | 0.02  | 0.01  | 0.4711 | 0.6003 | 0.3767 | 0.4978 | 0.4758 | dedicator of cytokinesis 6                                       |
| 319899    | Dook6     | 0.07  | 0.17  | 0.80  | 1.27  | 1.56  | 0.6473 | 0.5064 | 0.0999 | 0.0002 | 0.0000 | dedicator of cytokinesis 6                                       |
| 319899    | Dook6     | 0.01  | 0.08  | 0.26  | 0.02  | 0.04  | 0.6998 | 0.4877 | 0.6326 | 0.5059 | 0.3613 | dedicator of cytokinesis 6                                       |
| 67299     | Dook7     | 0.40  | -0.43 | -0.06 | 0.25  | 0.47  | 0.2132 | 0.1687 | 0.5940 | 0.1896 | 0.0096 | dedicator of cytokinesis 7                                       |
| 67299     | Dook7     | -0.18 | -0.16 | -0.12 | -0.11 | -0.09 | 0.2232 | 0.3031 | 0.4116 | 0.1491 | 0.1945 | dedicator of cytokinesis 7                                       |
| 67299     | Dook7     | 0.26  | -0.22 | -0.30 | 0.22  | 0.21  | 0.2723 | 0.3899 | 0.0936 | 0.1326 | 0.1817 | dedicator of cytokinesis 7                                       |
| 76088     | Dook8     | 0.48  | -0.52 | -0.38 | 0.00  | -1.49 | 0.2709 | 0.0680 | 0.1814 | 0.5603 | 0.3316 | dedicator of cytokinesis 8                                       |
| 76088     | Dook8     | -0.77 | -0.87 | -1.16 | -1.36 | -1.49 | 0.3072 | 0.3896 | 0.2143 | 0.0001 | 0.0000 | dedicator of cytokinesis 8                                       |
| 76088     | Dook8     | -0.13 | -0.23 | -0.23 | -0.18 | -0.22 | 0.4721 | 0.2668 | 0.3487 | 0.3148 | 0.0107 | dedicator of cytokinesis 8                                       |
| 76088     | Dook8     | -0.15 | 0.11  | -0.02 | -0.18 | -0.33 | 0.5151 | 0.5508 | 0.4383 | 0.2762 | 0.1546 | dedicator of cytokinesis 8                                       |
| 76088     | Dook8     | 0.23  | 0.83  | 0.57  | 0.44  | 0.45  | 0.5456 | 0.1486 | 0.3047 | 0.0364 | 0.0209 | dedicator of cytokinesis 8                                       |
| 76088     | Dook8     | -0.03 | -0.03 | -0.09 | 0.01  | -0.03 | 0.6396 | 0.4824 | 0.2252 | 0.5490 | 0.4055 | dedicator of cytokinesis 8                                       |
| 76088     | Dook8     | 0.00  | 0.01  | -0.03 | -0.10 | -0.03 | 0.7032 | 0.6333 | 0.5744 | 0.2033 | 0.3867 | dedicator of cytokinesis 8                                       |
| 105445    | Dook9     | -0.01 | 0.48  | 0.25  | 0.44  | 0.68  | 0.6976 | 0.1176 | 0.2448 | 0.1787 | 0.0208 | dedicator of cytokinesis 9                                       |
| 105445    | Dook9     | 0.00  | -0.24 | 0.40  | -0.14 | 0.18  | 0.7000 | 0.3424 | 0.1415 | 0.3175 | 0.2237 | dedicator of cytokinesis 9                                       |
| 76375     | Det1      | 0.17  | -0.87 | -1.37 | -0.98 | -1.59 | 0.4657 | 0.0077 | 0.0006 | 0.0002 | 0.0000 | de-oligated homolog 1 (Arabidopsis)                              |
| 72107     | Disc1     | 0.08  | -0.22 | -0.41 | -0.08 | -0.20 | 0.5954 | 0.1732 | 0.0505 | 0.2440 | 0.0500 | defective in sister chromatid cohesion 1 homolog (S. cerevisiae) |
| 13214     | Det1      | 0.05  | -0.09 | -0.08 | -0.06 | -0.02 | 0.6984 | 0.4432 | 0.4148 | 0.3235 | 0.4463 | defective in sister chromatid cohesion 1 homolog (S. cerevisiae) |
| 13214     | Det1      | 0.05  | -0.12 | -0.06 | 0.00  | 0.00  | 0.5434 | 0.1596 | 0.3414 | 0.3097 | 0.4910 | defensin beta 1                                                  |
| 246085    | Det10     | -0.04 | -0.04 | -0.02 | 0.02  | 0.02  | 0.6124 | 0.5631 | 0.5390 | 0.5088 | 0.4309 | defensin beta 1                                                  |
| 246085    | Det10     | 0.09  | -0.03 | 0.02  | 0.03  | 0.03  | 0.4220 | 0.4527 | 0.5955 | 0.4632 | 0.3629 | defensin beta 10                                                 |
| 246085    | Det10     | 0.37  | -0.06 | 0.05  | 0.16  | 0.00  | 0.4283 | 0.3635 | 0.4519 | 0.1360 | 0.4806 | defensin beta 11                                                 |
| 77674     | Det11     | 0.09  | -0.07 | -0.10 | -0.03 | -0.04 | 0.4384 | 0.5120 | 0.3968 | 0.4590 | 0.3328 | defensin beta 12                                                 |
| 246083    | Det12     | 0.01  | 0.05  | 0.05  | 0.10  | 0.02  | 0.6854 | 0.5389 | 0.5216 | 0.1145 | 0.4199 | defensin beta 13                                                 |
| 244332    | Det13     | 0.00  | -0.04 | 0.03  | 0.06  | -0.04 | 0.6953 | 0.5012 | 0.5851 | 0.4665 | 0.3236 | defensin beta 14                                                 |
| 246082    | Det15     | 0.03  | 0.02  | 0.07  | -0.01 | -0.06 | 0.6358 | 0.5900 | 0.6024 | 0.5218 | 0.2904 | defensin beta 15                                                 |
| 246700    | Det19     | 0.25  | -0.11 | -0.01 | 0.12  | 0.04  | 0.3847 | 0.3025 | 0.4285 | 0.2059 | 0.3743 | defensin beta 19                                                 |
| 246700    | Det19     | 0.03  | 0.09  | -0.01 | 0.00  | 0.04  | 0.6113 | 0.5127 | 0.5517 | 0.5852 | 0.3324 | defensin beta 19                                                 |
| 13215     | Det20     | 0.25  | -0.26 | -0.25 | 0.15  | 0.10  | 0.4477 | 0.4398 | 0.4303 | 0.0927 | 0.2241 | defensin beta 2                                                  |
| 319579    | Det20     | 0.01  | 0.02  | 0.00  | 0.01  | 0.08  | 0.6787 | 0.5707 | 0.6033 | 0.2765 | 0.0587 | defensin beta 20                                                 |
| 442835    | Det22     | 0.08  | 0.04  | 0.12  | 0.07  | 0.00  | 0.5562 | 0.5344 | 0.6106 | 0.3380 | 0.4860 | defensin beta 22                                                 |
| 442835    | Det22     | -0.02 | -0.03 | -0.06 | -0.07 | 0.00  | 0.6562 | 0.6476 | 0.5753 | 0.3310 | 0.4876 | defensin beta 22                                                 |
| 27358     | Det3      | 0.37  | -0.01 | 0.03  | -0.20 | -0.12 | 0.4899 | 0.3977 | 0.4077 | 0.2658 | 0.1737 | defensin beta 3                                                  |
| 360211    | Det34     | -0.01 | -0.03 | -0.02 | -0.05 | -0.03 | 0.6781 | 0.6529 | 0.6100 | 0.3935 | 0.3799 | defensin beta 34                                                 |
| 246084    | Det35     | 0.05  | -0.01 | 0.00  | 0.04  | 0.05  | 0.5939 | 0.5675 | 0.5900 | 0.4869 | 0.3043 | defensin beta 35                                                 |
| 266620    | Det36     | 0.08  | -0.03 | -0.04 | -0.04 | -0.17 | 0.5588 | 0.4484 | 0.3213 | 0.4391 | 0.0522 | defensin beta 36                                                 |
| 353320    | Det37     | 0.09  | -0.05 | -0.01 | 0.02  | -0.06 | 0.4875 | 0.4242 | 0.5552 | 0.5293 | 0.3177 | defensin beta 37                                                 |
| 360212    | Det38     | 0.03  | 0.02  | 0.05  | 0.01  | -0.05 | 0.6170 | 0.6550 | 0.5741 | 0.5333 | 0.2835 | defensin beta 38                                                 |
| 360214    | Det39     | 0.04  | 0.01  | 0.01  | -0.02 | -0.06 | 0.6040 | 0.6263 | 0.6132 | 0.4793 | 0.2828 | defensin beta 39                                                 |
| 360217    | Det40     | 0.01  | 0.05  | 0.00  | -0.01 | 0.05  | 0.6778 | 0.6203 | 0.5476 | 0.5452 | 0.3337 | defensin beta 40                                                 |
| 77673     | Det41     | 0.01  | -0.02 | 0.07  | -0.04 | 0.02  | 0.6549 | 0.5577 | 0.4462 | 0.3735 | 0.3883 | defensin beta 41                                                 |
| 619548    | Det42     | -0.02 | 0.06  | 0.01  | 0.02  | 0.06  | 0.6489 | 0.4162 | 0.5786 | 0.5059 | 0.2389 | defensin beta 42                                                 |
| 81007     | Det50     | -0.01 | 0.04  | 0.03  | 0.06  | 0.00  | 0.6875 | 0.5811 | 0.5892 | 0.3075 | 0.4805 | defensin beta 5                                                  |
| 387334    | Det50     | 0.06  | -0.03 | 0.00  | 0.02  | -0.02 | 0.4988 | 0.4952 | 0.5550 | 0.4821 | 0.3989 | defensin beta 50                                                 |
| 16746     | Det6      | -0.08 | -0.08 | -0.11 | 0.04  | 0.05  | 0.5142 | 0.4682 | 0.3067 | 0.5059 | 0.2871 | defensin beta 6                                                  |
| 246080    | Det7      | 0.11  | -0.08 | 0.05  | 0.03  | 0.02  | 0.4017 | 0.3417 | 0.4364 | 0.4694 | 0.4124 | defensin beta 7                                                  |
| 244334    | Det9      | 0.06  | -0.01 | -0.12 | -0.03 | 0.00  | 0.5540 | 0.6417 | 0.6055 | 0.4432 | 0.4914 | defensin beta 8                                                  |
| 246079    | Det9      | 0.04  | -0.07 | -0.14 | -0.02 | -0.03 | 0.6213 | 0.5056 | 0.1746 | 0.4743 | 0.4510 | defensin beta 9                                                  |
| 68009     | Detc20    | -0.10 | 0.03  | 0.03  | -0.03 | -0.05 | 0.3586 | 0.6047 | 0.5729 | 0.4435 | 0.2861 | defensin related cryptidin 20                                    |
| 66288     | Detc21    | 0.04  | 0.03  | -0.28 | 0.06  | -0.03 | 0.5596 | 0.6502 | 0.3254 | 0.3308 | 0.3503 | defensin related cryptidin 21                                    |
| 382059    | Detc22    | -0.15 | 0.06  | 0.01  | 0.02  | -0.02 | 0.3563 | 0.3599 | 0.5211 | 0.2017 | 0.2782 | defensin related cryptidin 22                                    |
| 487114    | Detc23    | 0.12  | -0.03 | -0.02 | -0.02 | 0.04  | 0.4099 | 0.4566 | 0.4558 | 0.5022 | 0.3502 | defensin related cryptidin 23                                    |
| 13237     | Detc3     | -0.45 | -0.19 | 1.02  | 0.03  | -0.52 | 0.4466 | 0.3655 | 0.3137 | 0.5297 | 0.0473 | defensin related cryptidin 3                                     |
| 13237     | Detc3     | 0.07  | 0.01  | 0.06  | 0.10  | 0.03  | 0.5269 | 0.5742 | 0.5837 | 0.2378 | 0.4018 | defensin related cryptidin 3                                     |
| 13239     | Detc5     | 0.01  | 0.06  | 0.00  | -0.01 | 0.04  | 0.6921 | 0.5726 | 0.5775 | 0.5478 | 0.3603 | defensin related cryptidin 5                                     |
| 13240     | Detc6     | -0.11 | 0.08  | 0.00  | -0.01 | 0.04  | 0.3444 | 0.3166 | 0.6404 | 0.3766 | 0.4856 | defensin related cryptidin 6                                     |
| Defc-rs10 | Defc-rs10 | 0.03  | -0.05 | -0.02 | 0.00  | -0.03 | 0.6109 | 0.4519 | 0.5727 | 0.5635 | 0.3824 | defensin related cryptidin, related sequence 10                  |
| 13219     | Defc-rs12 | -0.01 | -0.03 | 0.09  | -0.08 | -0.03 | 0.6676 | 0.4577 | 0.4831 | 0.2912 | 0.3643 | defensin related cryptidin, related sequence 12                  |
| 13222     | Defc-rs2  | 0.11  | -0.06 | -0.05 | 0.06  | -0.05 | 0.5158 | 0.3432 | 0.3163 | 0.3814 | 0.3018 | defensin related cryptidin, related sequence 2                   |
| 13222     | Defc-rs2  | -0.03 | -0.11 | -0.10 | -0.09 | -0.01 | 0.6213 | 0.3551 | 0.3612 | 0.2011 | 0.4595 | defensin related cryptidin, related sequence 2                   |
| 13226     | Defc-rs7  | 0.06  | 0.08  | 0.07  | 0.12  | 0.10  | 0.5313 | 0.5923 | 0.5906 | 0.1048 | 0.1086 | defensin related cryptidin, related sequence 7                   |
| 13218     | Defc-rs1  | -0.06 | -0.02 | 0.00  | -0.09 | -0.13 | 0.5609 | 0.6425 | 0.5807 | 0.2801 | 0.0849 | defensin related sequence cryptidin peptide (paneth cells)       |
| 13218     | Defc-rs1  | 0.01  | 0.00  | -0.01 | -0.04 | -0.03 | 0.6918 | 0.4672 | 0.4288 | 0.3900 | 0.3909 | defensin related sequence cryptidin peptide (paneth cells)       |
| 13216     | Defa1     | -0.01 | 0.09  | 0.00  | -0.05 | -0.02 | 0.6816 | 0.3725 | 0.6381 | 0.4315 | 0.4145 | defensin, alpha 1                                                |
| 54006     | Defa1     | -0.15 | -0.21 | -0.33 | -0.31 | -0.38 | 0.5368 | 0.1936 | 0.1064 | 0.0346 | 0.0016 | defomed epidermal aut regulatory factor 1 (Drosophila)           |
| 54006     | Defa1     | 0.03  | 0.00  | 0.02  | 0.05  | 0.00  | 0.6170 | 0.6284 | 0.5765 | 0.3656 | 0.4584 | defomed epidermal aut regulatory factor 1 (Drosophila)           |
| 54006     | Defa1     | 0.05  | 0.19  | 0.21  | 0.05  | 0.20  | 0.6587 | 0.6548 | 0.6302 | 0.4544 | 0.0898 | defomed epidermal aut regulatory factor 1 (Drosophila)           |
| 13244     | Degr1     | 0.28  | -0.40 | -0.10 | -0.05 | -0.01 | 0.3444 | 0.0756 | 0.3739 | 0.4492 | 0.4776 | degenerative spermatocyte homolog 1 (Drosophila)                 |
| 70059     | Degr2     | -0.05 | -0.07 | -0.52 | -0.72 | -0.82 | 0.6481 | 0.4164 | 0.0171 | 0.0014 | 0.0001 | degenerative spermatocyte homolog 2 (Drosophila)                 |
| 67422     | Dhds      | 0.21  | 0.21  | -0.37 | -0.82 | -1.23 | 0.5064 | 0.5540 | 0.1260 | 0.0121 | 0.0005 | dehydrodolichyl diphosphate synthase                             |
| 67422     | Dhds      | -0.19 | 0.63  | -0.15 | -0.66 | -0.97 | 0.5634 | 0.2226 | 0.1338 | 0.0485 | 0.0662 | dehydrodolichyl diphosphate synthase                             |

|        |        |       |       |       |       |       |        |        |        |        |                                                            |
|--------|--------|-------|-------|-------|-------|-------|--------|--------|--------|--------|------------------------------------------------------------|
| 68460  | Dhrs7c | 0.05  | 0.04  | -0.06 | 0.15  | 0.12  | 0.5544 | 0.4455 | 0.5467 | 0.1869 | 0.0997 dehydrogenase/reductase (SDR family) member 7C      |
| 241452 | Dhrs9  | 0.04  | 0.06  | 0.01  | -0.01 | -0.05 | 0.5856 | 0.6396 | 0.5310 | 0.5385 | 0.2751 dehydrogenase/reductase (SDR family) member 9       |
| 241452 | Dhrs9  | 0.01  | 0.04  | -0.02 | -0.02 | -0.06 | 0.6681 | 0.5311 | 0.5767 | 0.5076 | 0.2420 dehydrogenase/reductase (SDR family) member 9       |
| 236082 | Dhrsx  | -0.20 | 0.06  | 0.19  | -0.20 | -0.26 | 0.5093 | 0.5119 | 0.6257 | 0.2581 | 0.1049 dehydrogenase/reductase (SDR family) X chromosome   |
| 236082 | Dhrsx  | 0.15  | 0.48  | 0.55  | 0.70  | 0.55  | 0.5186 | 0.1365 | 0.0942 | 0.3069 | 0.0028 dehydrogenase/reductase (SDR family) X chromosome   |
| 71412  | Dhrs2  | 0.06  | -0.14 | 0.13  | -0.68 | 0.12  | 0.5682 | 0.4154 | 0.4035 | 0.3067 | 0.4528 dehydrogenase/reductase member 2                    |
| 107585 | Dio3   | 0.09  | 0.23  | 0.35  | 0.01  | 0.25  | 0.4841 | 0.0677 | 0.0127 | 0.2802 | 0.0258 deiodinase, iodothyronine type III, opposite strand |
| 353504 | Dio3os | 0.04  | -0.07 | 0.03  | -0.01 | 0.09  | 0.6129 | 0.5211 | 0.4688 | 0.5300 | 0.2493 deiodinase, iodothyronine type III, opposite strand |
| 13370  | Dio1   | 0.23  | -0.16 | -0.28 | -0.06 | -0.22 | 0.3741 | 0.1988 | 0.0551 | 0.4296 | 0.0384 deiodinase, iodothyronine, type I                   |
| 13371  | Dio2   | 0.22  | 1.82  | 1.82  | 1.52  | 1.76  | 0.5241 | 0.0046 | 0.0003 | 0.0008 | 0.0001 deiodinase, iodothyronine, type II                  |
| 110052 | Dek    | 0.42  | -0.43 | -0.06 | 0.21  | 0.63  | 0.3222 | 0.1174 | 0.4579 | 0.2577 | 0.0030 DEK oncogene (DNA binding)                          |
| 110052 | Dek    | -0.21 | 0.81  | 0.41  | -0.78 | -0.02 | 0.5452 | 0.1605 | 0.4443 | 0.0139 | 0.4715 DEK oncogene (DNA binding)                          |
| 13164  | Dazl   | -0.09 | 0.01  | 0.06  | -0.05 | -0.03 | 0.4467 | 0.5784 | 0.5651 | 0.4002 | 0.4371 deleted in azoospermia-like                         |
| 13164  | Dazl   | -0.06 | 0.04  | 0.08  | 0.06  | -0.01 | 0.4786 | 0.5912 | 0.4265 | 0.3128 | 0.0306 deleted in lymphocytic leukemia, 2                  |
| 56710  | Dbc-1  | 0.11  | -0.02 | 0.20  | 0.05  | 0.28  | 0.4949 | 0.5595 | 0.3912 | 0.4698 | 0.0970 deleted in bladder cancer 1 (human)                 |
| 56710  | Dbc-1  | -0.01 | -0.05 | -0.12 | -0.03 | 0.03  | 0.6761 | 0.4802 | 0.1660 | 0.4980 | 0.4770 deleted in colorectal carcinoma                     |
| 13176  | Dcc    | -0.07 | -0.04 | 0.00  | -0.08 | -0.14 | 0.4451 | 0.5387 | 0.6431 | 0.2773 | 0.4541 deleted in colorectal carcinoma                     |
| 13176  | Dcc    | -0.09 | -0.09 | 0.05  | -0.08 | -0.01 | 0.5305 | 0.6493 | 0.5086 | 0.2450 | 0.4712 deleted in colorectal carcinoma                     |
| 13176  | Dcc    | 0.04  | -0.06 | -0.03 | -0.01 | -0.01 | 0.5781 | 0.6011 | 0.5133 | 0.3066 | 0.4698 deleted in liver cancer 1                           |
| 302056 | Dic1   | 0.13  | 0.14  | 0.08  | -0.12 | 0.02  | 0.4865 | 0.6031 | 0.4465 | 0.1511 | 0.0231 deleted in lung and esophageal cancer 1             |
| 302056 | Dic1   | -0.12 | -0.06 | -0.10 | -0.19 | -0.30 | 0.4988 | 0.0025 | 0.0008 | 0.0003 | 0.0000 deleted in lymphocytic leukemia, 2                  |
| 328425 | Dic2   | 0.26  | -0.09 | 0.01  | -0.06 | -0.88 | 0.1968 | 0.0025 | 0.0008 | 0.0003 | 0.1241 deleted in lymphocytic leukemia, 2                  |
| 328425 | Dic2   | -0.09 | -0.06 | 0.02  | -0.06 | -0.14 | 0.4996 | 0.4195 | 0.6194 | 0.3883 | 0.0182 deleted in lymphocytic leukemia, 2                  |
| 328425 | Dic2   | -0.10 | -0.91 | -0.86 | -0.63 | -0.58 | 0.6469 | 0.1745 | 0.1994 | 0.0249 | 0.4485 deleted in lymphocytic leukemia, 7                  |
| 239133 | Dmb1   | 0.05  | -0.09 | -0.02 | 0.05  | 0.01  | 0.5364 | 0.3512 | 0.5529 | 0.4009 | 0.2086 deleted in malignant brain tumors 1                 |
| 12945  | Dmb1   | -0.07 | 0.06  | 0.03  | -0.11 | -0.10 | 0.5743 | 0.4796 | 0.4916 | 0.2571 | 0.1015 delta/notch-like EGF-related receptor               |
| 227325 | Dner   | 0.28  | 0.00  | 0.00  | 0.15  | 0.13  | 0.3199 | 0.4446 | 0.4326 | 0.0798 | 0.4752 delta/notch-like EGF-related receptor               |
| 227325 | Dner   | 0.13  | -0.02 | -0.02 | 0.09  | -0.01 | 0.3490 | 0.5566 | 0.5425 | 0.2795 | 0.2534 delta-like 1 (Drosophila)                           |
| 13388  | Dll1   | -0.82 | 1.02  | 0.62  | 0.58  | 0.40  | 0.4616 | 0.0525 | 0.1287 | 0.2633 | 0.2619 delta-like 1 (Drosophila)                           |
| 13388  | Dll1   | 0.91  | 0.58  | 0.92  | 0.61  | 0.39  | 0.4729 | 0.0605 | 0.1264 | 0.2625 | 0.2486 delta-like 1 (Drosophila)                           |
| 13388  | Dll1   | -0.36 | 0.95  | 0.53  | 0.66  | 0.41  | 0.4766 | 0.0766 | 0.1541 | 0.2288 | 0.2943 delta-like 1 (Drosophila)                           |
| 13388  | Dll1   | 0.28  | 0.92  | 0.47  | 0.67  | 0.66  | 0.5434 | 0.1518 | 0.1685 | 0.1685 | 0.0963 delta-like 1 (Drosophila)                           |
| 13388  | Dll1   | 0.31  | 0.98  | 0.53  | 0.61  | 0.30  | 0.5467 | 0.0161 | 0.1254 | 0.2482 | 0.3282 delta-like 1 (Drosophila)                           |
| 13388  | Dll1   | 0.22  | 0.93  | 0.50  | 0.59  | 0.62  | 0.5531 | 0.1018 | 0.4144 | 0.1357 | 0.1059 delta-like 1 (Drosophila)                           |
| 13388  | Dll1   | 0.23  | 0.79  | 0.36  | 0.62  | 0.43  | 0.5764 | 0.0931 | 0.4872 | 0.2178 | 0.2446 delta-like 1 (Drosophila)                           |
| 13388  | Dll1   | 0.17  | 0.84  | 0.46  | 0.67  | 0.55  | 0.6022 | 0.0902 | 0.0495 | 0.1715 | 0.1487 delta-like 1 (Drosophila)                           |
| 13388  | Dll1   | 0.18  | 0.94  | 0.59  | 0.61  | 0.52  | 0.6049 | 0.1339 | 0.4016 | 0.1925 | 0.1543 delta-like 1 (Drosophila)                           |
| 13386  | Dlk1   | 0.08  | 0.11  | 0.12  | 0.01  | -0.04 | 0.5062 | 0.4571 | 0.4077 | 0.5479 | 0.3882 delta-like 1 homolog (Drosophila)                   |
| 13386  | Dlk1   | 0.02  | 0.03  | 0.18  | 0.18  | 0.17  | 0.6753 | 0.6393 | 0.2027 | 0.2223 | 0.1758 delta-like 1 homolog (Drosophila)                   |
| 106565 | Dlk2   | 0.16  | 0.03  | 0.39  | 0.37  | -0.09 | 0.5477 | 0.5328 | 0.4204 | 0.0109 | 0.2387 delta-like 2 homolog (Drosophila)                   |
| 13389  | Dl3    | 0.01  | -0.10 | -0.03 | -0.09 | -0.08 | 0.6929 | 0.2433 | 0.4001 | 0.2882 | 0.2472 delta-like 3 (Drosophila)                           |
| 54485  | Dl4    | -0.84 | -0.98 | -0.40 | -0.82 | -0.89 | 0.3363 | 0.4137 | 0.6053 | 0.0015 | 0.0001 delta-like 4 (Drosophila)                           |
| 14357  | Dlx1   | -0.36 | 0.20  | -0.85 | -0.72 | -1.35 | 0.2705 | 0.6002 | 0.0028 | 0.0014 | 0.0000 dlx1 1 homolog (Drosophila)                         |
| 74198  | Dlx2   | -0.45 | 0.84  | 0.62  | 0.12  | -0.09 | 0.3544 | 0.1686 | 0.2227 | 0.0361 | 0.3841 dlx2 2 homolog (Drosophila)                         |
| 80904  | Dlx3   | 0.17  | 0.60  | 0.69  | 0.70  | 0.57  | 0.6591 | 0.0746 | 0.0383 | 0.0058 | 0.0054 dlx2 3 homolog (Drosophila)                         |
| 80904  | Dlx3   | 0.17  | 0.60  | 0.69  | 0.70  | 0.57  | 0.6591 | 0.0746 | 0.0383 | 0.0058 | 0.0043 dlx2 3 homolog (Drosophila)                         |
| 80904  | Dlx3   | -0.08 | 0.16  | 0.68  | 0.72  | 0.79  | 0.6589 | 0.3428 | 0.0361 | 0.0059 | 0.0000 dlx2 4 homolog (Drosophila)                         |
| 207521 | Dlx4   | 0.17  | 0.60  | 0.10  | 0.52  | 1.10  | 0.5249 | 0.2043 | 0.0105 | 0.0071 | 0.0000 dlx2 4 homolog (Drosophila)                         |
| 207521 | Dlx4   | -0.25 | 0.08  | 0.10  | -0.25 | -0.23 | 0.5477 | 0.3821 | 0.3499 | 0.0952 | 0.1274 dlx2 4 homolog (Drosophila)                         |
| 12850  | Cool7  | 0.40  | 0.25  | 0.09  | -0.42 | -0.05 | 0.5903 | 0.0586 | 0.0056 | 0.0054 | 0.0001 dlx2 4 homolog (Drosophila)                         |
| 12850  | Cool7  | -0.06 | 0.23  | 0.30  | 0.05  | 0.15  | 0.3523 | 0.5786 | 0.5998 | 0.0653 | 0.4214 demethyl-Q 7                                        |
| 13184  | Dpp1   | -0.06 | 0.07  | -0.01 | -0.08 | -0.09 | 0.5301 | 0.5687 | 0.1672 | 0.4948 | 0.1517 demilune cell and parotid protein 1                 |
| 13184  | Dpp1   | -0.03 | 0.07  | 0.08  | -0.02 | 0.06  | 0.6019 | 0.3875 | 0.3657 | 0.4935 | 0.2245 demilune cell and parotid protein 1                 |
| 630537 | Dpp2   | -0.05 | 0.08  | 0.04  | -0.01 | -0.04 | 0.5663 | 0.4936 | 0.5921 | 0.5263 | 0.2997 demilune cell and parotid protein 2                 |
| 620253 | Dpp3   | 0.01  | 0.02  | 0.06  | 0.05  | 0.05  | 0.6709 | 0.6526 | 0.4772 | 0.4124 | 0.3127 demilune cell and parotid protein 3                 |
| 13199  | Ddn    | 0.10  | 0.29  | 0.44  | 0.12  | 0.06  | 0.6019 | 0.5690 | 0.3893 | 0.1068 | 0.3661 dendrin                                             |
| 227801 | Dend1a | -0.25 | 0.32  | 0.82  | 0.76  | 0.73  | 0.4996 | 0.1405 | 0.0036 | 0.0036 | 0.0050 DENN/MADD domain containing 1A                      |
| 227801 | Dend1a | -0.08 | 0.77  | 0.85  | 0.33  | 0.65  | 0.6207 | 0.0381 | 0.0226 | 0.1523 | 0.0020 DENN/MADD domain containing 1A                      |
| 329260 | Dend1b | -0.07 | 0.05  | 0.19  | 0.00  | 0.08  | 0.5055 | 0.4659 | 0.0990 | 0.5553 | 0.2455 DENN/MADD domain containing 1B                      |
| 329260 | Dend1b | -0.17 | 0.39  | 0.65  | 0.91  | 1.11  | 0.5556 | 0.1217 | 0.0492 | 0.0002 | 0.0002 DENN/MADD domain containing 1B                      |
| 329260 | Dend1b | 0.00  | 0.26  | 0.05  | 0.04  | 0.11  | 0.6940 | 0.0965 | 0.5221 | 0.4543 | 0.1859 DENN/MADD domain containing 1B                      |
| 209773 | Dend1c | -0.73 | 0.20  | -0.56 | -0.44 | -0.88 | 0.3451 | 0.3129 | 0.5883 | 0.0470 | 0.0001 DENN/MADD domain containing 1C                      |
| 329727 | Dend2a | 0.08  | -0.56 | -0.44 | -0.03 | -0.24 | 0.6279 | 0.0683 | 0.2983 | 0.0928 | 0.1646 DENN/MADD domain containing 1C                      |
| 329727 | Dend2c | -0.45 | -0.23 | 0.08  | -0.22 | -0.09 | 0.2567 | 0.6306 | 0.3563 | 0.3687 | 0.2885 DENN/MADD domain containing 2C                      |
| 72121  | Dend2d | 0.33  | -0.38 | -0.91 | -0.33 | -0.71 | 0.3734 | 0.1521 | 0.0132 | 0.0539 | 0.0001 DENN/MADD domain containing 2C                      |
| 72121  | Dend2d | -0.40 | -0.18 | -0.46 | -0.36 | -0.55 | 0.4526 | 0.5476 | 0.5809 | 0.0041 | 0.0003 DENN/MADD domain containing 2D                      |
| 105841 | Dend3  | -0.53 | 0.60  | 0.69  | 0.18  | 0.12  | 0.0148 | 0.0013 | 0.0004 | 0.2480 | 0.3129 DENN/MADD domain containing 3                       |
| 105841 | Dend3  | -0.06 | 1.00  | 1.92  | 1.48  | 1.97  | 0.6544 | 0.0496 | 0.0010 | 0.0004 | 0.0000 DENN/MADD domain containing 3                       |
| 102442 | Dend4a | -0.33 | 0.26  | 0.32  | 0.28  | 0.12  | 0.4797 | 0.2361 | 0.1713 | 0.1747 | 0.1737 DENN/MADD domain containing 4A                      |
| 102442 | Dend4a | -0.03 | 0.00  | 0.01  | 0.02  | -0.03 | 0.6465 | 0.6521 | 0.6242 | 0.5196 | 0.4145 DENN/MADD domain containing 4A                      |
| 229541 | Dend4b | 0.25  | -0.20 | -0.17 | 0.12  | 0.19  | 0.3713 | 0.2717 | 0.2997 | 0.2947 | 0.0950 DENN/MADD domain containing 4B                      |
| 229541 | Dend4b | -0.03 | -0.12 | -0.57 | -0.55 | -0.74 | 0.6762 | 0.3289 | 0.0262 | 0.0001 | 0.0000 DENN/MADD domain containing 4B                      |
| 329877 | Dend4c | 0.05  | 0.03  | 0.04  | -0.04 | 0.04  | 0.5552 | 0.6252 | 0.5625 | 0.4578 | 0.3547 DENN/MADD domain containing 4C                      |
| 68184  | Dendr  | 0.57  | -0.30 | -0.39 | -0.05 | -0.02 | 0.1674 | 0.2716 | 0.1303 | 0.4658 | 0.4650 density-regulated protein                           |
| 68184  | Dendr  | 0.09  | -0.26 | -0.21 | -0.06 | -0.12 | 0.5330 | 0.3296 | 0.0648 | 0.4071 | 0.2122 density-regulated protein                           |
| 76843  | Dil    | 0.20  | -0.26 | 0.09  | -0.03 | -0.03 | 0.4469 | 0.1820 | 0.6415 | 0.5464 | 0.4083 denticleless homolog (Drosophila)                   |
| 76843  | Dil    | -0.03 | 0.02  | 0.01  | 0.00  | -0.01 | 0.6132 | 0.6054 | 0.6002 | 0.3163 | 0.4720 denticleless homolog (Drosophila)                   |
| 76843  | Dil    | 0.03  | 0.03  | 0.02  | 0.07  | 0.11  | 0.6833 | 0.4927 | 0.4407 | 0.4657 | 0.4071 dentin matrix protein 1                             |
| 13406  | Dpp-1  | 0.01  | 0.04  | 0.05  | 0.02  | 0.02  | 0.6222 | 0.1112 | 0.0583 | 0.1351 | 0.0119 deoxycytidine kinase                                |
| 666279 | Dppp   | 0.02  | 0.00  | 0.05  | -0.06 | -0.01 | 0.6682 | 0.6057 | 0.5718 | 0.3656 | 0.4645 dentin matrix protein 1                             |
| 13178  | Dok    | -0.21 | 0.06  | -0.05 | -0.24 | -0.26 | 0.2542 | 0.6548 | 0.3326 | 0.0129 | 0.0119 deoxycytidine kinase                                |
| 13178  | Dok    | -0.08 | 0.07  | -0.05 | -0.01 | -0.01 | 0.4981 | 0.37   |        |        |                                                            |

|         |        |       |        |       |       |        |        |        |        |        |                                                            |
|---------|--------|-------|--------|-------|-------|--------|--------|--------|--------|--------|------------------------------------------------------------|
| Dntp1p  | 76233  | -0.27 | 0.48   | 0.51  | 0.19  | 0.5025 | 0.4728 | 0.3929 | 0.4087 | 0.1868 | deoxynucleotidyltransferase, terminal, interacting protein |
| Dntp2p  | 99480  | -0.13 | 0.08   | 0.25  | 0.63  | 0.5673 | 0.3606 | 0.0638 | 0.0344 | 0.0014 | deoxynucleotidyltransferase, terminal, interacting protein |
| Dnae11p | 69637  | -0.37 | -0.59  | -0.32 | -0.59 | 0.5776 | 0.8002 | 0.6360 | 0.2557 | 0.0228 | deoxyribonuclease 1-like 1                                 |
| Dnae12p | 68705  | -0.36 | -0.72  | -0.47 | -0.38 | 0.6336 | 0.4106 | 0.1859 | 0.0095 | 0.0020 | deoxyribonuclease 1-like 2                                 |
| Dnae13p | 13421  | 0.36  | 0.01   | 0.09  | 0.03  | 0.1084 | 0.5523 | 0.6021 | 0.2252 | 0.3854 | deoxyribonuclease 1-like 3                                 |
| Dnae1p  | 13419  | -0.02 | 0.12   | 0.09  | -0.02 | 0.6391 | 0.1935 | 0.2555 | 0.4634 | 0.1256 | deoxyribonuclease 1                                        |
| Dnae2a  | 13423  | -0.64 | -0.11  | -0.35 | -0.55 | 0.1650 | 0.5577 | 0.5191 | 0.0008 | 0.0006 | deoxyribonuclease II alpha                                 |
| Dnae2b  | 13424  | -0.48 | 0.14   | -0.42 | -0.06 | 0.6355 | 0.4467 | 0.3195 | 0.0241 | 0.0003 | deoxyribonuclease II alpha                                 |
| Dnae2p  | 56629  | 0.03  | -0.02  | -0.06 | -0.18 | 0.6355 | 0.6028 | 0.1204 | 0.0161 | 0.0705 | deoxyribonuclease II beta                                  |
| Dlynk   | 21915  | 0.09  | -0.27  | -0.61 | -0.08 | 0.6453 | 0.3843 | 0.1362 | 0.0569 | 0.0025 | deoxyribonuclease I                                        |
| Dlynk   | 21915  | 0.10  | -0.02  | -0.62 | -0.72 | 0.6453 | 0.4618 | 0.3243 | 0.0608 | 0.0194 | deoxyribonuclease I                                        |
| Dut     | 110074 | -0.18 | 0.30</ |       |       |        |        |        |        |        |                                                            |

|        |        |       |       |       |       |       |        |        |        |                                                                         |
|--------|--------|-------|-------|-------|-------|-------|--------|--------|--------|-------------------------------------------------------------------------|
| 73708  | Dppa3  | 0.10  | -0.04 | -0.16 | -0.08 | -0.07 | 0.4427 | 0.1120 | 0.2671 | 0.2437 developmental pluripotency-associated 3                          |
| 13494  | Dig1   | 0.16  | -0.02 | -0.02 | 0.05  | 0.05  | 0.5375 | 0.5284 | 0.3929 | 0.2753 developmentally regulated GTP binding protein 1                  |
| 13494  | Dig2   | -0.35 | 0.00  | -0.21 | -0.27 | -0.64 | 0.5307 | 0.0760 | 0.5237 | 0.0008 developmentally regulated GTP binding protein 1                  |
| 13495  | Dig1   | -0.76 | 0.25  | 0.62  | 0.12  | 0.14  | 0.1989 | 0.0370 | 0.3815 | 0.2707 developmentally regulated GTP binding protein 2                  |
| 13499  | Drr1   | -0.08 | -0.24 | -0.16 | -0.02 | -0.04 | 0.6302 | 0.5797 | 0.6351 | 0.4085 developmentally regulated repeat element-containing transcript 1 |
| 58239  | Dexl   | -0.05 | 0.13  | -0.18 | -0.05 | -0.07 | 0.6105 | 0.3383 | 0.4758 | 0.3446 deamethasone-induced transcript                                  |
| 80861  | Dhx58  | -0.46 | 0.37  | 0.20  | -0.24 | -0.48 | 0.2405 | 0.4622 | 0.6379 | 0.0023 DEXH (Asp-Glu-X-His) box polypeptide 58                          |
| 80861  | Dhx58  | -0.06 | -0.09 | -0.02 | 0.01  | -0.04 | 0.5309 | 0.2963 | 0.5113 | 0.3528 DEXH (Asp-Glu-X-His) box polypeptide 58                          |
| 170624 | Dpp1   | 0.35  | 0.04  | 0.11  | 0.22  | 0.24  | 0.1091 | 0.6207 | 0.5748 | 0.0220 diabetic embryopathy 1                                           |
| 66593  | Diablo | 0.34  | 0.44  | 0.02  | 0.05  | 0.03  | 0.2051 | 0.0431 | 0.4828 | 0.4242 diabolic homolog (Drosophila)                                    |
| 66593  | Diablo | -0.12 | -0.36 | -0.56 | -0.13 | -0.39 | 0.4700 | 0.0256 | 0.0045 | 0.0211 diablo homolog (Drosophila)                                      |
| 331374 | Dgkx   | 0.02  | 0.13  | 0.26  | 0.10  | 0.28  | 0.6670 | 0.1389 | 0.1649 | 0.0066 diacylglycerol kinase kappa                                      |
| 104418 | Dgkz   | -0.44 | -0.33 | -0.42 | 0.08  | -0.13 | 0.5094 | 0.5840 | 0.6131 | 0.1662 diacylglycerol kinase zeta                                       |
| 131339 | Dgka   | 0.06  | -0.49 | -0.19 | 0.17  | 0.09  | 0.6791 | 0.5847 | 0.5472 | 0.3870 diacylglycerol kinase, alpha                                     |
| 217480 | Dgkb   | 0.29  | -0.03 | -0.12 | 0.21  | 0.13  | 0.3923 | 0.3903 | 0.2606 | 0.2364 diacylglycerol kinase, beta                                      |
| 217480 | Dgkb   | 0.15  | -0.07 | -0.10 | 0.01  | -0.04 | 0.4545 | 0.3353 | 0.2647 | 0.3877 diacylglycerol kinase, beta                                      |
| 217480 | Dgkb   | -0.01 | 0.07  | 0.18  | -0.03 | 0.06  | 0.6797 | 0.6405 | 0.3011 | 0.2812 diacylglycerol kinase, beta                                      |
| 217480 | Dgkb   | -0.01 | 0.09  | 0.02  | 0.02  | -0.07 | 0.6872 | 0.4551 | 0.4793 | 0.2355 diacylglycerol kinase, beta                                      |
| 227333 | Dgkd   | -0.71 | -0.05 | 0.07  | -0.10 | -0.10 | 0.4246 | 0.4372 | 0.3475 | 0.3760 diacylglycerol kinase, delta                                     |
| 227333 | Dgkd   | -0.02 | 1.18  | 1.21  | 1.21  | 1.41  | 0.6764 | 0.0012 | 0.0007 | 0.0000 diacylglycerol kinase, epsilon                                   |
| 56077  | Dgke   | -0.36 | -0.35 | -0.40 | -0.17 | -0.24 | 0.1977 | 0.0617 | 0.0193 | 0.0849 diacylglycerol kinase, epsilon                                   |
| 56077  | Dgke   | 0.03  | 0.06  | 0.03  | 0.06  | 0.11  | 0.6078 | 0.4579 | 0.5485 | 0.0044 diacylglycerol kinase, epsilon                                   |
| 380921 | Dgkh   | -0.79 | 1.17  | 1.48  | 0.70  | 0.82  | 0.6078 | 0.2947 | 0.0238 | 0.0011 diacylglycerol kinase, eta                                       |
| 380921 | Dgkh   | 0.50  | 1.45  | 1.10  | 1.31  | 1.77  | 0.3992 | 0.0415 | 0.0076 | 0.0000 diacylglycerol kinase, eta                                       |
| Dgkg   |        | -0.46 | -0.64 | -1.35 | -1.42 | -2.10 | 0.0916 | 0.0751 | 0.0004 | 0.0000 diacylglycerol kinase, gamma                                     |
| 110197 | Dgkg   | -0.08 | -0.06 | -0.08 | -0.15 | -0.11 | 0.4781 | 0.5070 | 0.4045 | 0.1368 diacylglycerol kinase, gamma                                     |
| 320127 | Dgkl   | -0.05 | -0.05 | -0.05 | -0.08 | -0.05 | 0.5863 | 0.5100 | 0.4996 | 0.2155 diacylglycerol kinase, iota                                      |
| 110524 | Dgql   | -0.04 | -0.50 | -0.75 | -0.58 | -0.66 | 0.6380 | 0.0071 | 0.0003 | 0.0004 diacylglycerol kinase, theta                                     |
| 110524 | Dgql   | 0.05  | 0.04  | -0.19 | -0.25 | -0.28 | 0.6515 | 0.6018 | 0.2392 | 0.0087 diacylglycerol kinase, theta                                     |
| 269060 | Dgla   | -0.06 | -0.04 | -0.10 | -0.27 | -0.23 | 0.6274 | 0.6503 | 0.5578 | 0.0761 diacylglycerol lipase, alpha                                     |
| 269060 | Dgla   | -0.03 | -0.02 | -0.03 | 0.01  | -0.02 | 0.6377 | 0.6522 | 0.6164 | 0.4380 diacylglycerol lipase, alpha                                     |
| 231871 | Daglb  | 0.11  | 0.27  | 0.04  | 0.02  | -0.14 | 0.5746 | 0.4067 | 0.5789 | 0.2080 diacylglycerol lipase, beta                                      |
| 231871 | Daglb  | 0.01  | -0.01 | 0.20  | -0.19 | -0.02 | 0.6996 | 0.5259 | 0.6045 | 0.4662 diacylglycerol O-acyltransferase 1                               |
| 13350  | Dgat1  | 0.15  | 0.06  | 0.28  | 0.54  | 0.32  | 0.3570 | 0.5984 | 0.0132 | 0.0202 diacylglycerol O-acyltransferase 1                               |
| 13350  | Dgat1  | -0.60 | 0.31  | 0.41  | 0.35  | -0.05 | 0.4263 | 0.2492 | 0.1975 | 0.4328 diacylglycerol O-acyltransferase 1                               |
| 67800  | Dgat2  | 0.87  | -0.69 | -0.26 | 0.37  | -0.21 | 0.3320 | 0.2159 | 0.5483 | 0.3475 diacylglycerol O-acyltransferase 2                               |
| 67800  | Dgat2  | 0.43  | -1.44 | -0.96 | 0.12  | -0.54 | 0.5713 | 0.3536 | 0.5156 | 0.1396 diacylglycerol O-acyltransferase 2                               |
| 245532 | Dgat2  | 0.21  | -0.74 | -0.17 | 0.27  | -0.11 | 0.5960 | 0.4050 | 0.5779 | 0.3672 diacylglycerol O-acyltransferase 2                               |
| 686257 | Dgat24 | -0.09 | 0.05  | -0.03 | -0.10 | -0.14 | 0.4046 | 0.5148 | 0.5708 | 0.0567 diacylglycerol O-acyltransferase 2, like 4                       |
| 13367  | Dgat26 | 0.04  | -0.07 | -0.03 | -0.01 | 0.06  | 0.5959 | 0.4899 | 0.6046 | 0.2398 diacylglycerol O-acyltransferase 2, like 6                       |
| 13367  | Dgat26 | 0.54  | 0.02  | 0.59  | 0.50  | 0.88  | 0.3204 | 0.5149 | 0.3492 | 0.0002 diacylglycerol O-acyltransferase 2, like 6                       |
| Dgap1  |        | -0.84 | 0.33  | 0.22  | -0.09 | -0.25 | 0.3407 | 0.2557 | 0.2775 | 0.0868 diaphanous homolog 1 (Drosophila)                                |
| 54004  | Dgap2  | 0.12  | 0.05  | 0.20  | 0.19  | 0.43  | 0.3952 | 0.5984 | 0.3100 | 0.0032 diaphanous homolog 1 (Drosophila)                                |
| 54004  | Dgap2  | 0.13  | 0.41  | 0.46  | 0.04  | 0.25  | 0.5327 | 0.1931 | 0.1516 | 0.1803 diaphanous homolog 2 (Drosophila)                                |
| 54004  | Dgap2  | 0.14  | 0.15  | 0.32  | 0.12  | 0.04  | 0.5415 | 0.6425 | 0.4273 | 0.0060 diaphanous homolog 2 (Drosophila)                                |
| 54004  | Dgap2  | 0.05  | -0.06 | -0.07 | 0.01  | -0.06 | 0.5895 | 0.5195 | 0.4751 | 0.2540 diaphanous homolog 2 (Drosophila)                                |
| 56419  | Dgap3  | -0.63 | -0.15 | -0.10 | -0.20 | -0.17 | 0.2287 | 0.6036 | 0.5466 | 0.2096 diaphanous homolog 3 (Drosophila)                                |
| 56419  | Dgap3  | -0.25 | 0.02  | -0.03 | -0.33 | -0.23 | 0.2664 | 0.5661 | 0.4061 | 0.0664 diaphanous homolog 3 (Drosophila)                                |
| Dbl    |        | -0.33 | -0.39 | -0.30 | -0.17 | -0.55 | 0.5737 | 0.5955 | 0.3483 | 0.0031 diazepam binding inhibitor                                       |
| 13168  | Dbls1  | -0.06 | -0.01 | -0.07 | -0.03 | -0.02 | 0.5166 | 0.6274 | 0.4839 | 0.4273 diazepam binding inhibitor-like 5                                |
| 67880  | Dcxr   | -0.41 | -0.27 | -0.24 | -0.32 | -0.50 | 0.3269 | 0.5646 | 0.5915 | 0.0048 dicarbonyl L-xylulose reductase                                  |
| 67880  | Dcxr   | 0.28  | -0.48 | -0.71 | -0.16 | -0.27 | 0.3367 | 0.0352 | 0.0014 | 0.1619 dicarbonyl L-xylulose reductase                                  |
| 67880  | Dcxr   | -0.13 | 0.13  | -0.10 | -0.09 | -0.34 | 0.3525 | 0.3520 | 0.4469 | 0.1320 dicarbonyl L-xylulose reductase                                  |
| 192119 | Dcer1  | -1.18 | 0.32  | 0.18  | -0.76 | -0.55 | 0.2654 | 0.2850 | 0.3172 | 0.0229 Dcer1, Dcr-1 homolog (Drosophila)                                |
| 192119 | Dcer1  | -0.08 | 0.57  | 0.98  | 0.41  | 0.70  | 0.6249 | 0.2118 | 0.0215 | 0.0001 Dcer1, Dcr-1 homolog (Drosophila)                                |
| 13380  | Dkk1   | 0.09  | 0.19  | 0.35  | 0.36  | 0.55  | 0.4553 | 0.3118 | 0.0597 | 0.0001 dickkopf homolog 1 (Xenopus laevis)                              |
| 13380  | Dkk1   | -0.06 | 0.17  | 0.25  | 0.06  | 0.04  | 0.6433 | 0.2788 | 0.0291 | 0.3673 dickkopf homolog 1 (Xenopus laevis)                              |
| 56811  | Dkk2   | 0.03  | -0.05 | -0.02 | -0.03 | -0.15 | 0.6497 | 0.6438 | 0.6032 | 0.0416 dickkopf homolog 2 (Xenopus laevis)                              |
| 50781  | Dkk3   | 0.22  | 0.19  | 0.41  | 0.36  | 0.67  | 0.3595 | 0.5354 | 0.2279 | 0.0006 dickkopf homolog 3 (Xenopus laevis)                              |
| 234130 | Dkk4   | 0.01  | -0.04 | -0.06 | 0.04  | 0.03  | 0.6940 | 0.5645 | 0.4642 | 0.4112 dickkopf homolog 4 (Xenopus laevis)                              |
| 50722  | Dkk4   | 0.13  | -0.02 | -0.42 | 0.32  | 0.08  | 0.0721 | 0.4259 | 0.0587 | 0.2853 dickkopf-like 1                                                  |
| 140477 | Dmbx1  | 0.83  | 0.08  | 0.16  | 0.15  | -0.01 | 0.5660 | 0.5427 | 0.165  | 0.4601 diencephalon/mesencephalon homeobox 1                            |
| 140477 | Dmbx1  | 0.01  | 0.08  | 0.03  | -0.01 | 0.02  | 0.6677 | 0.3722 | 0.5248 | 0.4148 diencephalon/mesencephalon homeobox 1                            |
| 58251  | Ddb1   | 0.09  | 0.03  | 0.10  | 0.27  | 0.35  | 0.4382 | 0.4614 | 0.2950 | 0.1706 differentially expressed in B16F10 1                             |
| 26901  | Ddb1   | 1.15  | -0.37 | -0.69 | 0.00  | -0.15 | 0.0263 | 0.1567 | 0.0372 | 0.0114 differentially expressed in B16F10 1                             |
| 26901  | Ddb1   | 0.15  | 0.12  | -0.21 | -0.39 | -0.52 | 0.5609 | 0.6004 | 0.4016 | 0.0002 differentially expressed in B16F10 1                             |
| 23853  | Ddb6   | 0.04  | 1.29  | 1.15  | 0.89  | 0.82  | 0.6573 | 0.0023 | 0.0026 | 0.0002 differentially expressed in FDCP 6                               |
| 23853  | Ddb6   | 0.02  | 1.56  | 1.45  | 0.90  | 1.12  | 0.6853 | 0.0050 | 0.0039 | 0.3839 differentially expressed in FDCP 6                               |
| 23854  | Ddb8   | 0.00  | 0.04  | -0.04 | -0.02 | -0.03 | 0.7011 | 0.6196 | 0.3889 | 0.0051 differentially expressed in FDCP 6                               |
| 23854  | Ddb8   | -0.19 | 0.08  | 0.28  | -0.02 | -0.39 | 0.4557 | 0.6547 | 0.4119 | 0.4918 differentially expressed in FDCP 8                               |
| 13356  | Ddgr2  | 0.53  | 0.03  | 0.38  | 0.21  | 0.00  | 0.6297 | 0.5652 | 0.1921 | 0.0001 DGeorge syndrome critical region gene 2                          |
| 13356  | Ddgr2  | 0.06  | -0.45 | 0.21  | 0.58  | 0.98  | 0.2029 | 0.2263 | 0.5743 | 0.0000 DGeorge syndrome critical region gene 2                          |
| 13356  | Ddgr2  | 0.31  | 0.22  | 0.37  | 0.37  | 0.61  | 0.3135 | 0.5626 | 0.3852 | 0.4259 DGeorge syndrome critical region gene 2                          |
| 13356  | Ddgr6  | 0.08  | -0.35 | -0.08 | -0.05 | -0.02 | 0.6039 | 0.0781 | 0.3563 | 0.0067 DGeorge syndrome critical region gene 6                          |
| 94223  | Ddgr8  | -0.17 | 0.36  | -0.15 | -0.04 | -0.75 | 0.5110 | 0.3863 | 0.3870 | 0.0082 DGeorge syndrome critical region gene 8                          |
| 94223  | Ddgr8  | 0.04  | -0.01 | -0.03 | 0.01  | -0.16 | 0.2804 | 0.5071 | 0.5740 | 0.1166 DGeorge syndrome critical region gene 8                          |
| 94223  | Ddgr8  | 0.07  | -0.22 | -0.27 | -0.15 | -0.22 | 0.6016 | 0.0982 | 0.0578 | 0.0340 DGeorge syndrome critical region gene 8                          |
| 71755  | Ddhd   | 0.09  | -0.06 | 0.01  | 0.02  | -0.10 | 0.4255 | 0.4313 | 0.3595 | 0.1166 dihydrotol dihydrogenase (dimeric)                               |
| 71755  | Ddhd   | 0.02  | -0.11 | -0.06 | -0.02 | -0.10 | 0.6336 | 0.3025 | 0.5176 | 0.1166 dihydrotol dihydrogenase (dimeric)                               |
| 13361  | Dhfr   | -0.85 | 0.16  | -0.31 | -0.81 | -0.91 | 0.0853 | 0.2968 | 0.4443 | 0.0006 dihydrofolate reductase                                          |
| 13361  | Dhfr   | -0.02 | -0.15 | -0.33 | -0.22 | -0.31 | 0.6626 | 0.2385 | 0.0193 | 0.0021 dihydrofolate reductase                                          |
| 13361  | Dhfr   | 0.02  | -0.01 | -0.10 | -0.08 | -0.06 | 0.6682 | 0.5142 | 0.2096 | 0.3380 dihydrofolate reductase                                          |
| 13371  | Dhfr   | -0.48 | 0.44  | 0.33  | -0.39 | -0.09 | 0.2466 | 0.3319 | 0.4203 | 0.3613 dihydrofolate reductase                                          |
| 13382  | Dld    | 0.37  | -0.21 | 0.03  | 0.20  | 0.28  | 0.3186 | 0.2738 | 0.5586 | 0.1008 dihydrofolate reductase                                          |
| 13382  | Dld    | 0.11  | -0.04 | 0.31  | 0.25  | 0.57  | 0.5849 | 0.1521 | 0.1567 | 0.0069 dihydrofolate reductase                                          |
| 13382  | Dld    | 0.01  | 0.18  | 0.16  | 0.13  | 0.54  | 0.6919 | 0.2591 | 0.0833 | 0.0018 dihydrofolate reductase                                          |
| 235339 | Dlat   | 0.57  | -0.27 | 0.01  | 0.25  | 0.03  | 0.0128 | 0.0567 | 0.6040 | 0.4060 dihydrofolate reductase                                          |
| 235339 | Dlat   | -0.09 | -0.02 | -0.06 | -0.11 | -0.35 | 0.5066 | 0.5232 | 0.4060 | 0.0046 dihydrofolate reductase                                          |
| 78920  | Dlat   | 1.02  | 0.77  | 1.02  | 0.20  | 0.14  | 0.1483 | 0.0554 | 0.0    |                                                                         |

|        |        |       |       |       |       |       |        |        |        |        |                                                                 |
|--------|--------|-------|-------|-------|-------|-------|--------|--------|--------|--------|-----------------------------------------------------------------|
| 56749  | Dhodh  | 0.10  | -0.52 | -0.91 | -0.50 | -0.69 | 0.5634 | 0.0585 | 0.0039 | 0.0063 | 0.0006 dihydroorotate dehydrogenase                             |
| 64705  | Dpys   | -0.14 | 0.15  | 0.19  | 0.05  | 0.04  | 0.3137 | 0.1191 | 0.0558 | 0.5021 | 0.4185 dihydroyrimidine                                         |
| 64705  | Dpys   | 0.03  | 0.02  | 0.07  | 0.33  | 0.16  | 0.0617 | 0.5851 | 0.3479 | 0.2444 | 0.1296 dihydroyrimidine                                         |
| 12934  | Dpys2  | -0.73 | 0.26  | 0.02  | -0.26 | -0.51 | 0.0361 | 0.2497 | 0.4138 | 0.0891 | 0.0016 dihydroyrimidine-like 2                                  |
| 12934  | Dpys2  | -0.75 | -0.50 | -0.47 | -0.35 | -0.56 | 0.4736 | 0.5855 | 0.5623 | 0.0822 | 0.0127 dihydroyrimidine-like 2                                  |
| 22240  | Dpys3  | 0.04  | 0.20  | 0.27  | 0.08  | 0.31  | 0.6658 | 0.6197 | 0.5428 | 0.3939 | 0.0748 dihydroyrimidine-like 3                                  |
| 26757  | Dpys4  | 0.01  | -0.11 | -0.04 | -0.03 | -0.07 | 0.6912 | 0.3798 | 0.6033 | 0.4952 | 0.2484 dihydroyrimidine-like 4                                  |
| 65254  | Dpys5  | 0.26  | 0.19  | 0.19  | 0.12  | 0.29  | 0.4900 | 0.5932 | 0.5859 | 0.2076 | 0.0026 dihydroyrimidine-like 5                                  |
| 65254  | Dpys5  | 0.05  | 0.04  | 0.11  | 0.21  | 0.28  | 0.6040 | 0.4929 | 0.3036 | 0.0546 | 0.0074 dihydroyrimidine-like 5                                  |
| 99586  | Dpyd   | -0.17 | -0.19 | 0.27  | 0.43  | 0.44  | 0.6033 | 0.5577 | 0.1825 | 0.0438 | 0.0145 dihydroyrimidine dehydrogenase                           |
| 68730  | Dus1   | -0.14 | 0.28  | 0.14  | 0.12  | 0.30  | 0.2708 | 0.0411 | 0.0220 | 0.1120 | 0.0049 dihydrouidine synthase 1-like (S. cerevisiae)            |
| 68730  | Dus1   | 0.51  | 0.49  | 0.51  | 0.05  | -0.06 | 0.4058 | 0.3651 | 0.3934 | 0.5336 | 0.4529 dihydrouidine synthase 1-like (S. cerevisiae)            |
| 68730  | Dus1   | -0.21 | 0.43  | 0.26  | 0.04  | 0.00  | 0.5164 | 0.4270 | 0.5795 | 0.5105 | 0.4908 dihydrouidine synthase 1-like (S. cerevisiae)            |
| 66369  | Dus2   | -0.02 | -0.06 | -0.85 | -0.53 | -1.13 | 0.6856 | 0.4298 | 0.0079 | 0.0010 | 0.0000 dihydrouidine synthase 2-like (SMM1, S. cerevisiae)      |
| 224907 | Dus3   | -0.61 | 0.01  | 0.21  | 0.32  | 0.22  | 0.4517 | 0.4075 | 0.2878 | 0.0189 | 0.1478 dihydrouidine synthase 3-like (S. cerevisiae)            |
| 71916  | Dus4   | 0.31  | -0.45 | -0.66 | -0.21 | -0.44 | 0.2767 | 0.0236 | 0.0053 | 0.0854 | 0.0005 dihydrouidine synthase 4-like (S. cerevisiae)            |
| 225913 | Dak    | -0.33 | -0.23 | -0.14 | -0.17 | -0.36 | 0.3553 | 0.6221 | 0.5851 | 0.1142 | 0.0021 dihydroxyacetone kinase 2 homolog (yeast)                |
| 66254  | Dmt1   | 0.33  | -0.67 | -0.55 | -0.21 | -0.05 | 0.3490 | 0.0529 | 0.0161 | 0.2670 | 0.4213 DM1 dimethyladenosine transferase 1-like (S. cerevisiae) |
| 66254  | Dmt1   | 0.18  | -0.20 | -0.14 | -0.02 | 0.09  | 0.3840 | 0.1591 | 0.2106 | 0.5168 | 0.2469 DM1 dimethyladenosine transferase 1-like (S. cerevisiae) |
| 69219  | Ddan1  | -0.07 | 0.37  | 0.22  | -0.02 | 0.16  | 0.6500 | 0.5097 | 0.6313 | 0.5382 | 0.1860 dimethylarginine dimethylaminohydrolase 1                |
| 51793  | Ddan2  | -0.52 | 0.50  | -0.09 | -0.62 | -1.00 | 0.2535 | 0.0398 | 0.5714 | 0.0340 | 0.0010 dimethylarginine dimethylaminohydrolase 2                |
| 74129  | Dmgdh  | -0.03 | -0.09 | -0.13 | 0.11  | 0.15  | 0.6662 | 0.5940 | 0.5224 | 0.4366 | 0.2837 dimethylglycine dehydrogenase precursor                  |
| 64451  | Dip2a  | 0.31  | -0.50 | -0.34 | -0.04 | -0.08 | 0.3618 | 0.0295 | 0.0885 | 0.4818 | 0.3299 DIP2 disco-interacting protein 2 homolog A (Drosophila)  |
| 64451  | Dip2a  | 0.07  | 0.15  | 0.00  | 0.06  | -0.05 | 0.5375 | 0.1525 | 0.5672 | 0.3798 | 0.3668 DIP2 disco-interacting protein 2 homolog A (Drosophila)  |
| 239667 | Dip2b  | -0.42 | -0.37 | -0.51 | 0.18  | -0.06 | 0.2800 | 0.0778 | 0.0739 | 0.3399 | 0.4232 DIP2 disco-interacting protein 2 homolog B (Drosophila)  |
| 239667 | Dip2b  | -0.41 | 0.25  | 0.47  | 0.23  | 0.22  | 0.3948 | 0.2006 | 0.0734 | 0.1875 | 0.2196 DIP2 disco-interacting protein 2 homolog B (Drosophila)  |
| 239667 | Dip2b  | 0.15  | 0.17  | 0.53  | 0.50  | 0.58  | 0.4639 | 0.3971 | 0.0097 | 0.0119 | 0.0038 DIP2 disco-interacting protein 2 homolog B (Drosophila)  |
| 239667 | Dip2b  | 0.06  | 0.06  | 0.25  | 0.24  | 0.43  | 0.5655 | 0.4191 | 0.1502 | 0.0137 | 0.0020 DIP2 disco-interacting protein 2 homolog B (Drosophila)  |
| 208440 | Dip2c  | 0.39  | -0.51 | -0.34 | 0.06  | -0.13 | 0.2132 | 0.0879 | 0.0745 | 0.4279 | 0.2594 DIP2 disco-interacting protein 2 homolog C (Drosophila)  |
| 208440 | Dip2c  | 0.20  | 0.19  | 0.09  | 0.12  | 0.10  | 0.4694 | 0.6195 | 0.5531 | 0.3353 | 0.3076 DIP2 disco-interacting protein 2 homolog C (Drosophila)  |
| 13479  | Drep1  | 0.41  | 0.05  | 0.24  | 0.49  | 0.60  | 0.3360 | 0.5540 | 0.4769 | 0.0495 | 0.0141 dipeptidase 1 (renal)                                    |
| 319446 | Drep2  | -0.28 | -0.05 | 0.12  | 0.18  | 0.14  | 0.3217 | 0.5696 | 0.2389 | 0.1836 | 0.2395 dipeptidase 2                                            |
| 71854  | Drep3  | -0.11 | 0.06  | 0.11  | 0.02  | -0.07 | 0.6920 | 0.6428 | 0.5504 | 0.4643 | 0.2254 dipeptidase 3                                            |
| 289109 | Dpp10  | -0.01 | 0.05  | 0.03  | 0.02  | -0.08 | 0.4413 | 0.4010 | 0.4001 | 0.4992 | 0.2372 dipeptidylpeptidase 10                                   |
| 289109 | Dpp10  | 0.21  | -0.03 | -0.03 | -0.03 | -0.05 | 0.4478 | 0.3800 | 0.3432 | 0.4613 | 0.2814 dipeptidylpeptidase 10                                   |
| 75221  | Dpp3   | 0.06  | 0.15  | -0.09 | 0.17  | 0.12  | 0.5736 | 0.1182 | 0.4798 | 0.1546 | 0.1768 dipeptidylpeptidase 3                                    |
| 75221  | Dpp3   | -0.08 | -0.07 | -0.26 | -0.32 | -0.35 | 0.6306 | 0.4952 | 0.2604 | 0.0598 | 0.0136 dipeptidylpeptidase 3                                    |
| 13482  | Dpp4   | 0.07  | -0.13 | 0.00  | 0.09  | 0.18  | 0.6207 | 0.6456 | 0.4922 | 0.3817 | 0.1706 dipeptidylpeptidase 4                                    |
| 13482  | Dpp4   | -0.09 | -0.26 | -0.11 | 0.44  | 0.17  | 0.6714 | 0.5539 | 0.4547 | 0.0310 | 0.1672 dipeptidylpeptidase 4                                    |
| 13483  | Dpp6   | 0.05  | 0.00  | 0.02  | -0.01 | -0.05 | 0.6859 | 0.5993 | 0.5728 | 0.0723 | 0.4091 dipeptidylpeptidase 6                                    |
| 13483  | Dpp6   | 0.06  | 0.04  | -0.01 | 0.08  | -0.08 | 0.5389 | 0.6343 | 0.6467 | 0.5418 | 0.2497 dipeptidylpeptidase 6                                    |
| 83768  | Dpp7   | 0.36  | -0.18 | -0.03 | 0.30  | 0.42  | 0.2982 | 0.3627 | 0.5318 | 0.1620 | 0.2985 dipeptidylpeptidase 7                                    |
| 83768  | Dpp7   | 0.28  | -0.09 | -0.12 | -0.25 | -0.25 | 0.4298 | 0.3523 | 0.2414 | 0.1132 | 0.0295 dipeptidylpeptidase 7                                    |
| 74388  | Dpp8   | -0.20 | -0.25 | -0.29 | -0.25 | -0.16 | 0.3540 | 0.0862 | 0.0299 | 0.0188 | 0.0668 dipeptidylpeptidase 8                                    |
| 74388  | Dpp8   | 0.21  | 0.06  | -0.12 | 0.04  | 0.12  | 0.4410 | 0.6371 | 0.3420 | 0.5170 | 0.3060 dipeptidylpeptidase 8                                    |
| 74388  | Dpp8   | -0.19 | 0.33  | 0.20  | -0.10 | -0.26 | 0.4618 | 0.5468 | 0.3689 | 0.3869 | 0.0610 dipeptidylpeptidase 8                                    |
| 74388  | Dpp8   | -0.19 | 0.06  | 0.20  | -0.25 | -0.20 | 0.5544 | 0.2327 | 0.3154 | 0.2098 | 0.2273 dipeptidylpeptidase 8                                    |
| 224897 | Dpp9   | 0.23  | 0.01  | 0.32  | 0.39  | 0.76  | 0.4486 | 0.6459 | 0.3494 | 0.0313 | 0.0002 dipeptidylpeptidase 9                                    |
| 208666 | Dpras1 | 0.13  | 0.02  | -0.03 | 0.07  | 0.06  | 0.3664 | 0.6013 | 0.4554 | 0.2302 | 0.2933 DIRAS family, GTP-binding RAS-like 1                     |
| 72662  | Dis3   | -0.41 | 0.80  | 0.33  | -0.83 | -0.79 | 0.5051 | 0.4120 | 0.6409 | 0.0187 | 0.0071 DIS3 miblic control homolog (S. cerevisiae)              |
| 72662  | Dis3   | -0.36 | -0.17 | 0.50  | 0.33  | -0.73 | 0.5350 | 0.5146 | 0.1359 | 0.0742 | 0.0013 DIS3 miblic control homolog (S. cerevisiae)              |
| 213550 | Dis3l  | 0.21  | -0.25 | -0.64 | -0.59 | -0.82 | 0.3764 | 0.2085 | 0.0080 | 0.0078 | 0.0002 DIS3 miblic control homolog (S. cerevisiae)-like         |
| 213550 | Dis3l  | 0.26  | -0.28 | -0.76 | -0.53 | -0.97 | 0.3969 | 0.1433 | 0.0119 | 0.0193 | 0.0001 DIS3 miblic control homolog (S. cerevisiae)-like         |
| 208718 | Dis3l2 | -0.50 | 0.70  | 0.05  | -0.99 | -1.13 | 0.4308 | 0.4222 | 0.5161 | 0.0084 | 0.0013 DIS3 miblic control homolog (S. cerevisiae)-like 2       |
| 208718 | Dis3l2 | -0.80 | 0.53  | 0.49  | 0.19  | -0.07 | 0.5234 | 0.2707 | 0.2902 | 0.2509 | 0.3624 DIS3 miblic control homolog (S. cerevisiae)-like 2       |
| 13131  | Dab1   | -0.14 | 0.00  | 0.04  | 0.67  | -0.05 | 0.3028 | 0.5769 | 0.4459 | 0.3042 | 0.3049 disabled homolog 1 (Drosophila)                          |
| 13131  | Dab1   | -0.06 | 0.05  | 0.06  | -0.05 | 0.02  | 0.5194 | 0.4780 | 0.4313 | 0.3640 | 0.4244 disabled homolog 1 (Drosophila)                          |
| 13131  | Dab1   | -0.02 | 0.02  | -0.02 | -0.03 | -0.02 | 0.6483 | 0.6102 | 0.5472 | 0.4534 | 0.3260 disabled homolog 1 (Drosophila)                          |
| 13132  | Dab2   | 0.35  | -0.78 | -0.03 | -0.03 | -0.03 | 0.6956 | 0.6076 | 0.6232 | 0.4847 | 0.3500 disabled homolog 2 (Drosophila)                          |
| 13132  | Dab2   | 0.03  | -0.04 | -0.09 | -0.11 | -0.05 | 0.2813 | 0.0731 | 0.2970 | 0.4688 | 0.1316 disabled homolog 2 (Drosophila)                          |
| 13132  | Dab2   | 0.26  | 0.01  | 0.12  | -0.08 | -0.16 | 0.6522 | 0.4155 | 0.6253 | 0.2421 | 0.2545 disabled homolog 2 (Drosophila)                          |
| 69801  | Dab2lp | -0.01 | -0.01 | 0.13  | 0.10  | 0.32  | 0.6951 | 0.5353 | 0.5941 | 0.3971 | 0.0912 disabled homolog 2 (Drosophila)                          |
| 12305  | Ddr1   | -0.13 | 0.20  | 0.20  | -0.12 | -0.30 | 0.4991 | 0.4868 | 0.3781 | 0.4230 | 0.1713 discoidin domain receptor family, member 1               |
| 18214  | Ddr2   | -0.93 | -0.09 | -0.05 | 0.03  | -0.12 | 0.4494 | 0.4353 | 0.3997 | 0.5230 | 0.3314 discoidin domain receptor family, member 2               |
| 18214  | Ddr2   | -0.23 | -0.13 | -0.19 | 0.16  | 0.25  | 0.4890 | 0.5047 | 0.4192 | 0.2233 | 0.0030 discoidin domain receptor family, member 2               |
| 66686  | Dcbd1  | 0.53  | 0.05  | 0.59  | 0.54  | 1.25  | 0.2306 | 0.5007 | 0.2019 | 0.0733 | 0.0095 discoidin, CUB and LCCL domain containing 1              |
| 66686  | Dcbd1  | 0.33  | -0.54 | -0.43 | -0.26 | 0.24  | 0.3023 | 0.0390 | 0.0915 | 0.0553 | 0.0295 discoidin, CUB and LCCL domain containing 1              |
| 73379  | Dcbd2  | 0.18  | -0.12 | 0.04  | 0.14  | 0.23  | 0.1955 | 0.3341 | 0.5134 | 0.0612 | 0.0102 discoidin, CUB and LCCL domain containing 1              |
| 73379  | Dcbd2  | 0.22  | -0.27 | -0.05 | 0.12  | 0.19  | 0.2585 | 0.0564 | 0.6371 | 0.2284 | 0.0797 discoidin, CUB and LCCL domain containing 2              |
| 224897 | Dcbd2  | 0.12  | 0.05  | -0.06 | 0.11  | 0.17  | 0.3577 | 0.5461 | 0.3926 | 0.1488 | 0.0747 discs, large (Drosophila) homolog-associated protein 1   |
| 224897 | Dcbd2  | -0.20 | 0.07  | 0.02  | -0.16 | -0.18 | 0.4034 | 0.6418 | 0.5527 | 0.2455 | 0.1595 discs, large (Drosophila) homolog-associated protein 1   |
| 224897 | Dcbd2  | 0.06  | -0.05 | 0.09  | -0.03 | -0.03 | 0.5609 | 0.4070 | 0.4449 | 0.4221 | 0.3926 discs, large (Drosophila) homolog-associated protein 1   |
| 224897 | Dcbd2  | -0.07 | -0.08 | -0.03 | -0.02 | -0.11 | 0.6778 | 0.5965 | 0.5966 | 0.2452 | 0.4927 discs, large (Drosophila) homolog-associated protein 1   |
| 244310 | Digp1  | 0.01  | -0.07 | -0.08 | -0.03 | -0.02 | 0.4903 | 0.4307 | 0.5752 | 0.5178 | 0.0961 discs, large (Drosophila) homolog-associated protein 2   |
| 244310 | Digp2  | 0.12  | 0.25  | 0.37  | 0.11  | -0.08 | 0.6292 | 0.6129 | 0.6207 | 0.3927 | 0.2995 discs, large (Drosophila) homolog-associated protein 2   |
| 244310 | Digp2  | -0.17 | 0.13  | 0.12  | -0.33 | -0.32 | 0.5288 | 0.6013 | 0.5727 | 0.0151 | 0.0087 discs, large (Drosophila) homolog-associated protein 2   |
| 244310 | Digp3  | 0.15  | 0.23  | 0.45  | 0.18  | 0.07  | 0.4103 | 0.3828 | 0.0742 | 0.1425 | 0.0017 discs, large (Drosophila) homolog-associated protein 3   |
| 13383  | Dig1   | 0.08  | 0.14  | 0.13  | -0.06 | 0.08  | 0.5898 | 0.5759 | 0.5731 | 0.4756 | 0.3606 discs, large (Drosophila) homolog-associated protein 3   |
| 13383  | Dig1   | 0.16  | 0.04  | 0.01  | 0.12  | 0.03  | 0.3612 | 0.4892 | 0.2089 | 0.2899 | 0.3904 discs, large (Drosophila) homolog-associated protein 3   |
| 23859  | Dig2   | -0.04 | 0.09  | 0.07  | 0.02  | 0.00  | 0.3854 | 0.3612 | 0.4892 | 0.4848 | 0.4949 discs, large (Drosophila) homolog-associated protein 3   |

|            |             |       |       |       |       |        |        |        |        |                                                                                                                          |
|------------|-------------|-------|-------|-------|-------|--------|--------|--------|--------|--------------------------------------------------------------------------------------------------------------------------|
| 228336     | Dgap4       | -0.13 | -0.58 | -0.44 | -0.78 | 0.5667 | 0.3491 | 0.0087 | 0.0746 | 0.0017 discs, large homolog-associated protein 4 (Drosophila)                                                            |
| 13543      | Dv12        | -0.22 | -0.50 | -0.55 | -0.64 | 0.2207 | 0.0137 | 0.0177 | 0.0043 | 0.0008 dishevelled 2, dsh homolog (Drosophila)                                                                           |
| 13544      | Dv13        | -0.01 | 0.04  | 0.11  | 0.04  | 0.6804 | 0.3794 | 0.5601 | 0.2461 | 0.3634 dishevelled 3, dsh homolog (Drosophila)                                                                           |
| 208946     | Daam1       | -0.37 | 0.54  | -0.44 | 0.04  | 0.2192 | 0.1650 | 0.4695 | 0.0240 | 0.0157 dishevelled associated activator of morphogenesis 1                                                               |
| 208946     | Daam1       | -0.44 | 0.37  | 0.01  | -0.16 | 0.4046 | 0.0859 | 0.1162 | 0.5464 | 0.2036 dishevelled associated activator of morphogenesis 1                                                               |
| 208946     | Daam1       | -0.12 | -0.17 | -0.44 | -0.28 | 0.5992 | 0.6010 | 0.1648 | 0.4022 | 0.1418 dishevelled associated activator of morphogenesis 1                                                               |
| 76441      | DaaM2       | 0.07  | -0.04 | 0.23  | 0.35  | 0.3505 | 0.4849 | 0.3322 | 0.0145 | 0.0023 dishevelled associated activator of morphogenesis 2                                                               |
| 76441      | DaaM2       | 0.06  | 0.01  | 0.04  | 0.14  | 0.4599 | 0.5859 | 0.5468 | 0.4059 | 0.0455 dishevelled associated activator of morphogenesis 2                                                               |
| 76441      | DaaM2       | 0.39  | 0.82  | 0.65  | 1.05  | 0.5882 | 0.0829 | 0.0041 | 0.0051 | 0.0008 dishevelled associated activator of morphogenesis 2                                                               |
| 13542      | Dv11        | 0.26  | 0.06  | 0.18  | 0.24  | 0.2086 | 0.4693 | 0.5659 | 0.2159 | 0.0925 dishevelled, dsh homolog 1 (Drosophila)                                                                           |
| 13542      | Dv11        | 0.27  | 0.11  | 0.60  | 0.66  | 0.4735 | 0.6467 | 0.4400 | 0.0528 | 0.0160 dishevelled, dsh homolog 1 (Drosophila)                                                                           |
| 68897      | Disp1       | 0.27  | -0.39 | 0.27  | 0.02  | 0.3125 | 0.0151 | 0.0355 | 0.4771 | 0.4615 dispatched homolog 1 (Drosophila)                                                                                 |
| 68897      | Disp1       | 0.34  | 0.53  | 0.68  | 0.41  | 0.4587 | 0.0851 | 0.0406 | 0.0085 | 0.0018 dispatched homolog 1 (Drosophila)                                                                                 |
| 214240     | Disp2       | -0.49 | 0.36  | 0.32  | -0.06 | 0.1952 | 0.2397 | 0.2625 | 0.5111 | 0.4908 dispatched homolog 2 (Drosophila)                                                                                 |
| 214240     | Disp2       | -0.07 | 0.10  | 0.04  | -0.04 | 0.4477 | 0.2709 | 0.0163 | 0.3570 | 0.3033 dispatched homolog 2 (Drosophila)                                                                                 |
| 224132     | Disc2       | 0.51  | -0.36 | 0.10  | 0.12  | 0.3117 | 0.0771 | 0.6042 | 0.0952 | 0.0015 dispatched in renal carcinoma 2 (human)                                                                           |
| 224132     | Disc2       | 0.59  | -0.34 | 0.22  | 0.11  | 0.3117 | 0.3094 | 0.4368 | 0.1482 | 0.1948 disrupted in schizophrenia 1                                                                                      |
| 244667     | Disc1       | -0.07 | 0.02  | 0.05  | -0.04 | 0.2907 | 0.2084 | 0.0707 | 0.4792 | 0.1230 disrupted in schizophrenia 1                                                                                      |
| 244667     | Disc1       | -0.02 | -0.08 | 0.04  | -0.13 | 0.5000 | 0.5634 | 0.4657 | 0.4582 | 0.4387 disrupted in schizophrenia 1                                                                                      |
| 13390      | Dk1         | -0.08 | 0.02  | -0.08 | -0.12 | 0.6534 | 0.5014 | 0.4157 | 0.1942 | 0.1643 disrupted in schizophrenia 1                                                                                      |
| 13392      | Dk2         | 0.18  | 0.03  | 0.09  | 0.06  | 0.5407 | 0.5959 | 0.2931 | 0.4688 | 0.3643 distal-less homeobox 1                                                                                            |
| 13393      | Dk3         | -0.03 | 0.02  | -0.04 | 0.05  | 0.6109 | 0.2507 | 0.5799 | 0.3464 | 0.2416 distal-less homeobox 2                                                                                            |
| 13394      | Dk4         | -0.01 | 0.16  | 0.15  | 0.19  | 0.6821 | 0.4113 | 0.3481 | 0.0976 | 0.4838 distal-less homeobox 3                                                                                            |
| 13396      | Dk5         | -0.07 | 0.08  | -0.07 | 0.15  | 0.3722 | 0.3238 | 0.3212 | 0.3642 | 0.0216 distal-less homeobox 4                                                                                            |
| 13397      | Dk6         | -0.01 | 0.04  | -0.07 | -0.15 | 0.6703 | 0.5901 | 0.6044 | 0.5434 | 0.0654 distal-less homeobox 5                                                                                            |
| 330938     | Dk6as       | -0.11 | 0.25  | 0.43  | 0.13  | 0.5993 | 0.5984 | 0.4210 | 0.3345 | 0.1372 distal-less homeobox 6                                                                                            |
| 330938     | Dkdc1       | 0.12  | -0.08 | -0.09 | -0.18 | 0.4717 | 0.2784 | 0.2448 | 0.3118 | 0.1600 distal-less homeobox 6, antisense                                                                                 |
| 330938     | Dkdc1       | -0.14 | -1.34 | -0.42 | -0.65 | 0.6538 | 0.3443 | 0.2146 | 0.0979 | 0.0126 DIX domain containing 1                                                                                           |
| 320038     | Dk6os1      | 0.06  | 0.01  | 0.02  | -0.01 | 0.5321 | 0.5645 | 0.6033 | 0.5053 | 0.4710 Dk6 opposite strand transcript 1                                                                                  |
| 320038     | Dk6os1      | 0.01  | -0.06 | 0.02  | 0.11  | 0.6747 | 0.4035 | 0.6338 | 0.3642 | 0.4386 Dk6 opposite strand transcript 1                                                                                  |
| 13404      | Dmcs1       | -0.02 | 0.06  | 0.03  | 0.06  | 0.6431 | 0.5167 | 0.6019 | 0.4671 | 0.2972 DMC1 dosage suppressor of mck1 homolog, meiosis-specific homologous recombination (yeast)disrupted meiotic cDNA 1 |
| 56296      | Dmrb1       | -0.10 | -0.07 | -0.06 | -0.12 | 0.4573 | 0.6451 | 0.4689 | 0.3834 | 0.1350 DMRT-like family B with proline-rich C-terminal, 1                                                                |
| 56296      | Dmrb1       | 0.03  | 0.54  | 0.37  | -0.04 | 0.6636 | 0.2423 | 0.2693 | 0.4647 | 0.2845 DMRT-like family B with proline-rich C-terminal, 1                                                                |
| 70887      | Dmrtc1a     | 0.10  | -0.04 | -0.04 | -0.07 | 0.4717 | 0.4752 | 0.4130 | 0.4714 | 0.3073 DMRT-like family C1a                                                                                              |
| 632708     | Dmrtc1b     | 0.14  | -0.04 | -0.04 | -0.03 | 0.4121 | 0.4066 | 0.4854 | 0.5578 | 0.3938 DMRT-like family C1b                                                                                              |
| 71083      | Dmrtc1c     | -0.05 | 0.09  | -0.04 | 0.03  | 0.5708 | 0.3213 | 0.6361 | 0.4502 | 0.3599 DMRT-like family C1c                                                                                              |
| 240283     | Dmrtc1d     | 0.30  | -0.65 | -0.34 | -0.41 | 0.2240 | 0.0080 | 0.0105 | 0.0033 | 0.0004 Dmrt-like 1                                                                                                       |
| 240283     | Dmrtc1d     | 0.15  | 0.08  | 0.21  | 0.31  | 0.2915 | 0.5423 | 0.0680 | 0.0113 | 0.0030 Dmrt-like 1                                                                                                       |
| 240283     | Dmrtc1d     | 0.07  | -0.06 | -0.15 | -0.02 | 0.5645 | 0.3700 | 0.3764 | 0.0499 | 0.4381 Dmrt-like 1                                                                                                       |
| 235380     | Dmrtc2      | 0.37  | -0.37 | -0.33 | -0.16 | 0.1057 | 0.0228 | 0.0164 | 0.0648 | 0.2642 Dmrt-like 2                                                                                                       |
| 235380     | Dmrtc2      | -0.39 | 0.52  | 0.08  | -0.51 | 0.2561 | 0.1166 | 0.4418 | 0.0210 | 0.0329 Dmrt-like 2                                                                                                       |
| 235380     | Dmrtc2      | 0.12  | -0.21 | -0.30 | 0.01  | 0.5177 | 0.3487 | 0.1516 | 0.5438 | 0.4270 Dmrt-like 2                                                                                                       |
| 54477      | Dmrtc3      | -0.96 | -0.09 | 0.12  | 0.20  | 0.5266 | 0.4225 | 0.3514 | 0.0491 | 0.0022 Dmrt-like 2                                                                                                       |
| 54477      | Dmrtc3      | -0.28 | 0.02  | -0.43 | -0.27 | 0.3469 | 0.5478 | 0.2435 | 0.1311 | 0.0001 DNA binding protein with his-thr domain                                                                           |
| 55947      | Dmrtc1a     | 0.04  | 0.02  | 0.01  | -0.12 | 0.6077 | 0.5624 | 0.5172 | 0.1240 | 0.0684 DNA cross-link repair 1A, PSO2 homolog (S. cerevisiae)                                                            |
| 55947      | Dmrtc1a     | 0.01  | -0.56 | -0.24 | -0.16 | 0.6170 | 0.1965 | 0.5602 | 0.4599 | 0.4588 DNA cross-link repair 1A, PSO2 homolog (S. cerevisiae)                                                            |
| 140917     | Dmrtc1b     | 0.21  | 0.06  | -0.02 | 0.16  | 0.3661 | 0.6545 | 0.0336 | 0.1154 | 0.1433 DNA cross-link repair 1B, PSO2 homolog (S. cerevisiae)                                                            |
| 227525     | Dmrtc1c     | 0.09  | -0.04 | -0.02 | 0.04  | 0.4289 | 0.4321 | 0.4753 | 0.4344 | 0.1478 DNA cross-link repair 1C, PSO2 homolog (S. cerevisiae)                                                            |
| 227525     | Dmrtc1c     | 0.11  | 0.19  | 0.07  | 0.06  | 0.5011 | 0.4540 | 0.5959 | 0.3333 | 0.4728 DNA cross-link repair 1C, PSO2 homolog (S. cerevisiae)                                                            |
| 227525     | Dmrtc1c     | 0.08  | -0.06 | -0.10 | 0.08  | 0.5122 | 0.3810 | 0.1603 | 0.3085 | 0.2392 DNA cross-link repair 1C, PSO2 homolog (S. cerevisiae)                                                            |
| 227525     | Dmrtc1c     | 0.10  | 0.39  | 0.26  | 0.06  | 0.6152 | 0.4488 | 0.5839 | 0.4043 | 0.4541 DNA cross-link repair 1C, PSO2 homolog (S. cerevisiae)                                                            |
| 13347      | Dmrtc1c     | 0.30  | -0.61 | -0.56 | -0.18 | 0.3444 | 0.0170 | 0.0115 | 0.2524 | 0.0037 DNA cross-link repair 1C, PSO2 homolog (S. cerevisiae)                                                            |
| 13347      | Dmrtc1c     | -0.10 | -0.06 | -0.06 | -0.02 | 0.4211 | 0.6104 | 0.5847 | 0.4901 | 0.1548 DNA fragmentation factor, alpha subunit                                                                           |
| 13347      | Dmrtc1c     | 0.11  | -0.33 | -0.16 | -0.05 | 0.6128 | 0.1633 | 0.3235 | 0.4992 | 0.1369 DNA fragmentation factor, alpha subunit                                                                           |
| 13368      | Dmrtc1c     | -0.04 | 0.12  | 0.36  | 0.27  | 0.6352 | 0.5985 | 0.1433 | 0.0547 | 0.3547 DNA fragmentation factor, beta subunit                                                                            |
| 13433      | Dmrt1       | -0.67 | 0.24  | 0.02  | -0.23 | 0.0818 | 0.2704 | 0.5887 | 0.1838 | 0.0048 DNA fragmentation factor, alpha subunit                                                                           |
| 66233      | Dmap1       | -0.19 | -0.05 | -0.32 | -0.71 | 0.2516 | 0.5218 | 0.0516 | 0.0306 | 0.0005 DNA methylation factor, cytosine-5                                                                                |
| 13435      | Dmrt3a      | -0.07 | -0.10 | -0.06 | -0.31 | 0.6103 | 0.3939 | 0.6256 | 0.3339 | 0.0063 DNA methyltransferase 1-associated protein 1                                                                      |
| 13435      | Dmrt3a      | -0.63 | 0.40  | 0.08  | -0.82 | 0.3570 | 0.4102 | 0.6198 | 0.0188 | 0.3604 DNA methyltransferase 1-associated protein 1                                                                      |
| 13435      | Dmrt3a      | -0.15 | 0.55  | 0.14  | -0.16 | 0.5187 | 0.0971 | 0.5628 | 0.2779 | 0.0028 DNA methyltransferase 3A                                                                                          |
| 13436      | Dmrt3a      | 0.08  | -0.31 | -0.17 | -0.04 | 0.5204 | 0.1132 | 0.2744 | 0.5172 | 0.0948 DNA methyltransferase 3A                                                                                          |
| 13436      | Dmrt3a      | 0.18  | -0.44 | -0.60 | -0.32 | 0.5519 | 0.0074 | 0.0046 | 0.0159 | 0.4583 DNA methyltransferase 3B                                                                                          |
| 272158     | Poin        | -0.10 | 0.07  | 0.12  | -0.07 | 0.5375 | 0.5771 | 0.4097 | 0.4151 | 0.0055 DNA methyltransferase 3B                                                                                          |
| 19075      | Pim1        | 0.06  | -0.51 | -0.63 | -0.49 | 0.6178 | 0.169  | 0.0040 | 0.0038 | 0.4508 DNA polymerase N                                                                                                  |
| 19076      | Pim2        | 0.08  | 0.28  | 0.32  | 0.08  | 0.4301 | 0.2474 | 0.2052 | 0.3082 | 0.0000 DNA primase, p49 subunit                                                                                          |
| 327762     | Pim2        | 0.06  | 0.06  | 0.05  | 0.14  | 0.5716 | 0.4225 | 0.3876 | 0.1943 | 0.2223 DNA primase, p58 subunit                                                                                          |
| 327762     | Pim2        | 0.09  | -0.60 | -0.47 | -0.02 | 0.6638 | 0.4478 | 0.5266 | 0.5464 | 0.1394 DNA replication helicase 2 homolog (yeast)                                                                        |
| 327762     | Pim2        | -0.01 | -0.16 | -0.13 | -0.38 | 0.6868 | 0.1219 | 0.1882 | 0.0030 | 0.4934 DNA replication helicase 2 homolog (yeast)                                                                        |
| D1Bwg0212e |             | 0.27  | 0.03  | 0.40  | 0.47  | 0.3734 | 0.4009 | 0.3139 | 0.0028 | 0.0041 DNA replication helicase 2 homolog (yeast)                                                                        |
| 52846      | D1Bwg0212e  | 0.07  | -0.13 | 0.14  | 0.12  | 0.5623 | 0.4603 | 0.3937 | 0.2988 | 0.0001 DNA segment, Chr 1, Brigham & Women's Genetics 0212 expressed                                                     |
| 27877      | D1Erd471e   | -0.12 | -0.39 | -0.03 | -0.50 | 0.5870 | 0.1871 | 0.5948 | 0.3470 | 0.0014 DNA segment, Chr 1, Brigham & Women's Genetics 0212 expressed                                                     |
| 27877      | D1Erd471e   | 0.02  | -0.05 | -0.04 | 0.02  | 0.6514 | 0.3823 | 0.3715 | 0.5049 | 0.0214 DNA segment, Chr 1, ERATO Dcl 471, expressed                                                                      |
| 213056     | D1Erd53e    | -1.10 | -0.08 | 0.09  | -0.44 | 0.1371 | 0.4871 | 0.3491 | 0.1206 | 0.1794 DNA segment, Chr 1, ERATO Dcl 53, expressed                                                                       |
| 213056     | D1Erd53e    | -0.30 | -0.13 | 0.07  | -0.10 | 0.3072 | 0.2498 | 0.5783 | 0.3369 | 0.2621 DNA segment, Chr 1, ERATO Dcl 53, expressed                                                                       |
| 213056     | D1Erd53e    | -0.03 | -0.08 | -0.11 | -0.03 | 0.6163 | 0.4779 | 0.5209 | 0.1770 | 0.3734 DNA segment, Chr 1, ERATO Dcl 53, expressed                                                                       |
| 52392      | D1Erd622e   | 0.49  | -0.82 | -0.73 | -0.32 | 0.0474 | 0.0053 | 0.0004 | 0.0337 | 0.0080 DNA segment, Chr 1, ERATO Dcl 622, expressed                                                                      |
| 110957     | D1Pas1      | 0.52  | 0.08  | 0.50  | 0.62  | 0.0771 | 0.6016 | 0.3084 | 0.0021 | 0.0001 DNA segment, Chr 1, Pasteur Institute 1                                                                           |
| 110957     | D1Pas1      | 0.04  | 0.02  | 0.05  | 0.07  | 0.5887 | 0.6246 | 0.6380 | 0.4214 | 0.2365 DNA segment, Chr 1, Pasteur Institute 1                                                                           |
| 52802      | D1OBwg1070e | 0.04  | 0.02  | 0.05  | 0.07  | 0.5887 | 0.6246 | 0.6380 | 0.4214 | 0.0015 DNA segment, Chr 10, Brigham & Women's Genetics 1070 expressed                                                    |
| 216169     | D1OBwg1364e | -0.37 | 0.13  | -0.31 | -0.58 | 0.2144 | 0.6111 | 0.1348 | 0.0114 | 0.1447 DNA segment, Chr 10, Brigham & Women's Genetics 1364 expressed                                                    |
| 215821     | D1OBwg1379e | -0.28 | -0.31 | -0.33 | -0.22 | 0.5017 | 0.1142 | 0.1994 | 0.3567 | 0.0887 DNA segment, Chr 10, Brigham & Women's Genetics 1379 expressed                                                    |
| 215821     | D1OBwg1379e | -0.41 | -0.08 | 0.06  | -0.04 | 0.1506 | 0.2546 | 0.5764 | 0.4736 | 0.0680 DNA segment, Chr 10, Brigham & Women's Genetics 1379 expressed                                                    |
| 215821     | D1OBwg1379e | -0.19 | 0.13  | 0.23  | -0.11 | 0.4458 | 0.6048 | 0.4387 | 0.2547 | 0.0000 DNA segment, Chr 10, Brigham & Women's Genetics 1379 expressed                                                    |
| 215821     | D1OBwg1379e | 0.18  | 0.18  |       |       |        |        |        |        |                                                                                                                          |

|        |             |        |       |       |       |       |        |        |        |        |                                                                        |
|--------|-------------|--------|-------|-------|-------|-------|--------|--------|--------|--------|------------------------------------------------------------------------|
| 28295  | D10Ju81e    | -0.68  | 0.20  | 0.07  | -0.03 | -0.25 | 0.2646 | 0.2697 | 0.3309 | 0.5043 | 0.0004 DNA segment, Chr 10, Johns Hopkins University 81, expressed     |
| 28295  | D10Ju81e    | -0.28  | 0.03  | -0.60 | -0.60 | -0.89 | 0.3337 | 0.6459 | 0.0538 | 0.0236 | 0.0004 DNA segment, Chr 10, Johns Hopkins University 81, expressed     |
| 28295  | D10Wsu102e  | -0.73  | 0.70  | -0.12 | -0.09 | -0.56 | 0.2286 | 0.0690 | 0.2337 | 0.0396 | 0.0074 DNA segment, Chr 10, Wayne State University 102, expressed      |
| 28008  | D10Wsu52e   | 0.27   | 0.03  | -0.22 | -0.02 | 0.14  | 0.5238 | 0.5183 | 0.3830 | 0.5315 | 0.2080 DNA segment, Chr 10, Wayne State University 52, expressed       |
| 52897  | D11Bwg0517e | 0.42   | 0.36  | 0.46  | 0.43  | 0.58  | 0.2434 | 0.1085 | 0.0364 | 0.0109 | 0.0002 DNA segment, Chr 11, Brigham & Women's Genetics 0517, expressed |
| 52897  | D11Bwg0517e | -0.11  | 0.28  | 0.27  | 0.37  | 0.42  | 0.5789 | 0.5373 | 0.0577 | 0.0009 | 0.0002 DNA segment, Chr 11, Brigham & Women's Genetics 0517, expressed |
| 27652  | D11Wsu47e   | 0.24   | -0.55 | -0.63 | -0.58 | -0.10 | 0.4277 | 0.0216 | 0.0078 | 0.0171 | 0.3011 DNA segment, Chr 11, Wayne State University 47, expressed       |
| 28081  | D11Wsu49e   | 0.08   | 0.33  | 0.57  | 0.31  | 0.62  | 0.6064 | 0.0391 | 0.0801 | 0.0301 | 0.0000 DNA segment, Chr 11, Wayne State University 99, expressed       |
| 28081  | D11Wsu49e   | -0.01  | 0.19  | 0.39  | 0.09  | 0.60  | 0.6815 | 0.0344 | 0.0260 | 0.0018 | 0.0007 DNA segment, Chr 11, Wayne State University 99, expressed       |
| 52635  | D12Erd551e  | 0.5235 | 0.07  | 0.02  | 0.11  | 0.53  | 0.3488 | 0.5144 | 0.2035 | 0.0284 | 0.0001 DNA segment, Chr 12, ERATO Doi 551, expressed                   |
| 52635  | D12Erd551e  | 0.07   | -0.26 | 0.02  | 0.15  | 0.08  | 0.5809 | 0.6447 | 0.4751 | 0.3251 | 0.0450 DNA segment, Chr 12, ERATO Doi 551, expressed                   |
| 76920  | D12Erd553e  | 0.27   | -0.08 | 0.24  | 0.15  | 0.08  | 0.3176 | 0.1397 | 0.4617 | 0.2817 | 0.2959 DNA segment, Chr 12, ERATO Doi 553, expressed                   |
| 52668  | D12Erd647e  | 0.44   | -0.57 | -0.60 | -0.13 | -0.19 | 0.2309 | 0.0379 | 0.0167 | 0.3949 | 0.0205 DNA segment, Chr 12, ERATO Doi 647, expressed                   |
| 28126  | D13Wsu177e  | -0.05  | -0.22 | -0.42 | -0.50 | -0.61 | 0.5951 | 0.1065 | 0.0052 | 0.0003 | 0.0000 DNA segment, Chr 13, Wayne State University 177, expressed      |
| 28126  | D13Wsu177e  | -0.29  | 0.15  | 0.08  | 0.37  | 0.36  | 0.5971 | 0.3454 | 0.3511 | 0.0316 | 0.0215 DNA segment, Chr 13, Wayne State University 177, expressed      |
| 218850 | D14Aab1e    | 0.60   | -0.41 | -0.70 | 0.13  | -0.23 | 0.0806 | 0.0313 | 0.0065 | 0.2711 | 0.0790 DNA segment, Chr 14, Abbott 1, expressed                        |
| 218850 | D14Aab1e    | 0.16   | -0.02 | -0.07 | 0.01  | -0.03 | 0.4473 | 0.4802 | 0.3677 | 0.5384 | 0.4072 DNA segment, Chr 14, Abbott 1, expressed                        |
| 218850 | D14Aab1e    | 0.03   | -0.07 | -0.11 | -0.16 | -0.19 | 0.6486 | 0.3677 | 0.2637 | 0.0665 | 0.0319 DNA segment, Chr 14, Abbott 1, expressed                        |
| 218850 | D14Aab1e    | -0.04  | -0.50 | -0.12 | -0.81 | -0.90 | 0.6650 | 0.0352 | 0.0007 | 0.0002 | 0.0192 DNA segment, Chr 14, Abbott 1, expressed                        |
| 218850 | D14Aab1e    | 0.00   | -0.35 | -0.09 | -0.22 | -0.22 | 0.7031 | 0.5963 | 0.1924 | 0.0027 | 0.0162 DNA segment, Chr 14, Abbott 1, expressed                        |
| 52616  | D14Erd426e  | 0.30   | -0.02 | 0.14  | 0.12  | 0.13  | 0.2207 | 0.5091 | 0.2140 | 0.1870 | 0.0691 DNA segment, Chr 14, ERATO Doi 426, expressed                   |
| 218978 | D14Erd436e  | -0.46  | 0.50  | 0.12  | -0.75 | -0.61 | 0.2918 | 0.1950 | 0.5741 | 0.0226 | 0.0242 DNA segment, Chr 14, ERATO Doi 436, expressed                   |
| 218978 | D14Erd436e  | -0.46  | 0.50  | 0.12  | -0.75 | -0.61 | 0.2918 | 0.1950 | 0.5741 | 0.0226 | 0.0242 DNA segment, Chr 14, ERATO Doi 436, expressed                   |
| 66039  | D14Erd496e  | -1.45  | -0.20 | -0.06 | -0.12 | -0.11 | 0.5574 | 0.1947 | 0.3847 | 0.3080 | 0.2841 DNA segment, Chr 14, ERATO Doi 449, expressed                   |
| 219072 | D14Erd500e  | 0.10   | 0.05  | -0.26 | -0.01 | 0.16  | 0.5870 | 0.5796 | 0.1190 | 0.5390 | 0.1721 DNA segment, Chr 14, ERATO Doi 500, expressed                   |
| 219132 | D14Erd686e  | 0.25   | -1.13 | -1.21 | -0.44 | -0.81 | 0.5480 | 0.0062 | 0.0008 | 0.2722 | 0.0273 DNA segment, Chr 14, ERATO Doi 686, expressed                   |
| 210998 | D15Erd621e  | 0.14   | -0.07 | 0.38  | 0.32  | 0.59  | 0.3840 | 0.0547 | 0.0526 | 0.0188 | 0.0001 DNA segment, Chr 15, ERATO Doi 621, expressed                   |
| 210998 | D15Erd621e  | 0.35   | -0.64 | -0.24 | -0.14 | 0.20  | 0.3863 | 0.0416 | 0.2532 | 0.3602 | 0.1970 DNA segment, Chr 15, ERATO Doi 621, expressed                   |
| 210998 | D15Erd621e  | -0.07  | -0.03 | 0.03  | -0.04 | 0.01  | 0.5255 | 0.6085 | 0.5569 | 0.4574 | 0.4710 DNA segment, Chr 15, ERATO Doi 621, expressed                   |
| 106073 | D15Wsu169e  | -0.14  | 0.11  | 0.28  | 0.12  | 0.26  | 0.5480 | 0.6374 | 0.4696 | 0.4089 | 0.1009 DNA segment, Chr 15, Mouse Genome Informatics 27, expressed     |
| 223666 | D15Wsu169e  | -0.26  | -0.03 | -0.12 | -0.25 | -0.39 | 0.4379 | 0.4881 | 0.6006 | 0.1219 | 0.0254 DNA segment, Chr 15, Wayne State University 169, expressed      |
| 28075  | D15Wsu175e  | 0.19   | -0.31 | -0.01 | 0.09  | 0.07  | 0.4710 | 0.1122 | 0.4969 | 0.4692 | 0.3546 DNA segment, Chr 15, Wayne State University 75, expressed       |
| 28075  | D15Wsu175e  | 0.16   | -0.19 | -0.04 | -0.09 | -0.41 | 0.5454 | 0.2347 | 0.3827 | 0.3811 | 0.0235 DNA segment, Chr 15, Wayne State University 75, expressed       |
| 67102  | D16Erd472e  | 0.18   | -0.39 | -0.24 | -0.20 | -0.18 | 0.3864 | 0.0247 | 0.0606 | 0.0459 | 0.0418 DNA segment, Chr 16, ERATO Doi 472, expressed                   |
| 67102  | D16Erd472e  | 0.42   | 1.29  | 1.66  | 1.35  | 2.05  | 0.4009 | 0.0402 | 0.0062 | 0.0000 | 0.0000 DNA segment, Chr 16, ERATO Doi 472, expressed                   |
| 67102  | D16Erd472e  | -0.23  | -0.01 | -0.31 | -0.51 | -0.60 | 0.4068 | 0.5079 | 0.0868 | 0.0110 | 0.0007 DNA segment, Chr 16, ERATO Doi 472, expressed                   |
| 67102  | D16Erd472e  | 0.06   | -0.41 | -0.29 | -0.35 | -0.42 | 0.6523 | 0.0234 | 0.0564 | 0.0110 | 0.0014 DNA segment, Chr 16, ERATO Doi 472, expressed                   |
| 52645  | D16Erd519e  | 0.06   | 0.08  | 0.05  | -0.03 | 0.00  | 0.6020 | 0.5362 | 0.5362 | 0.4818 | 0.4893 DNA segment, Chr 16, ERATO Doi 519, expressed                   |
| 27983  | D16H225680E | 0.27   | -0.28 | -0.54 | 0.04  | 0.13  | 0.3268 | 0.0840 | 0.0070 | 0.5043 | 0.1630 DNA segment, Chr 16, human D225680E, expressed                  |
| 114695 | D17H6S53E   | 0.11   | 0.08  | -0.09 | -0.17 | -0.17 | 0.2652 | 0.4777 | 0.3447 | 0.0251 | 0.2223 DNA segment, Chr 16, human D225680E, expressed                  |
| 114695 | D17H6S53E   | 0.11   | -0.06 | -0.10 | 0.02  | -0.03 | 0.3646 | 0.3578 | 0.2374 | 0.5084 | 0.0623 DNA segment, Chr 17, human D6S53E, expressed                    |
| 110956 | D17Wsu104e  | -0.89  | 1.43  | 0.01  | 0.81  | 0.72  | 0.3444 | 0.0421 | 0.0403 | 0.0131 | 0.3802 DNA segment, Chr 17, human D6S56E 3, expressed                  |
| 28106  | D17Wsu104e  | -0.23  | 0.41  | 0.01  | -0.46 | -0.79 | 0.5373 | 0.0692 | 0.5291 | 0.1642 | 0.0164 DNA segment, Chr 17, Wayne State University 104, expressed      |
| 224647 | D17Wsu482e  | -0.57  | 0.95  | 0.84  | 0.24  | 0.22  | 0.2237 | 0.0407 | 0.2946 | 0.1957 | 0.1647 DNA segment, Chr 17, Wayne State University 92, expressed       |
| 224647 | D17Wsu482e  | -0.31  | 0.35  | 0.24  | -0.22 | 0.11  | 0.4909 | 0.2500 | 0.0266 | 0.1801 | 0.3004 DNA segment, Chr 17, Wayne State University 92, expressed       |
| 52492  | D18Erd0232e | 0.10   | 0.09  | 0.22  | 0.34  | 0.52  | 0.5075 | 0.4129 | 0.0853 | 0.0246 | 0.0013 DNA segment, Chr 18, ERATO Doi 232, expressed                   |
| 52492  | D18Erd0232e | 0.06   | -0.34 | -0.44 | -0.45 | -0.53 | 0.5736 | 0.0270 | 0.0045 | 0.0008 | 0.0001 DNA segment, Chr 18, ERATO Doi 232, expressed                   |
| 52662  | D18Erd653e  | -0.04  | 0.75  | 0.62  | 0.44  | 0.50  | 0.6581 | 0.0247 | 0.0448 | 0.0158 | 0.0055 DNA segment, Chr 18, ERATO Doi 653, expressed                   |
| 52674  | D19Bwg1357e | -0.85  | 0.12  | -0.19 | -0.44 | -0.92 | 0.2045 | 0.3668 | 0.5573 | 0.0071 | 0.0001 DNA segment, Chr 19, Brigham & Women's Genetics 1357, expressed |
| 52874  | D19Bwg1357e | 0.49   | -0.52 | -0.65 | 0.03  | -0.05 | 0.2285 | 0.0578 | 0.0305 | 0.5316 | 0.3939 DNA segment, Chr 19, Brigham & Women's Genetics 1357, expressed |
| 52874  | D19Bwg1357e | 0.39   | -0.54 | -0.54 | -0.06 | 0.06  | 0.3655 | 0.1024 | 0.0726 | 0.4909 | 0.4125 DNA segment, Chr 19, Brigham & Women's Genetics 1357, expressed |
| 52874  | D19Bwg1357e | -0.08  | -0.05 | -0.41 | -0.17 | -0.54 | 0.6363 | 0.5243 | 0.3974 | 0.2649 | 0.0023 DNA segment, Chr 19, Brigham & Women's Genetics 1357, expressed |
| 52874  | D19Bwg1357e | -0.01  | -0.07 | -0.09 | -0.07 | 0.07  | 0.6677 | 0.5280 | 0.4431 | 0.2720 | 0.2154 DNA segment, Chr 19, Brigham & Women's Genetics 1357, expressed |
| 52013  | D19Erd386e  | 0.10   | -0.05 | -0.13 | -0.08 | -0.10 | 0.5266 | 0.3845 | 0.1719 | 0.3653 | 0.1365 DNA segment, Chr 19, ERATO Doi 386, expressed                   |
| 52013  | D19Erd386e  | 0.15   | -0.02 | 0.09  | -0.02 | 0.11  | 0.5326 | 0.4105 | 0.5744 | 0.5300 | 0.2466 DNA segment, Chr 19, ERATO Doi 386, expressed                   |
| 52013  | D19Erd409e  | 0.00   | 0.85  | -0.09 | -0.07 | 0.06  | 0.6984 | 0.5661 | 0.2657 | 0.3793 | 0.2905 DNA segment, Chr 19, ERATO Doi 386, expressed                   |
| 52016  | D19Erd409e  | -0.15  | 0.04  | 0.05  | 0.78  | 1.00  | 0.5441 | 0.0142 | 0.0052 | 0.0001 | 0.0000 DNA segment, Chr 19, ERATO Doi 386, expressed                   |
| 70906  | D19Erd652e  | -0.38  | 0.48  | 0.19  | -0.22 | -0.32 | 0.2237 | 0.0625 | 0.1679 | 0.2092 | 0.0790 DNA segment, Chr 19, ERATO Doi 652, expressed                   |
| 70906  | D19Erd652e  | 0.35   | -0.52 | -0.81 | -0.42 | -0.36 | 0.2237 | 0.0625 | 0.1679 |        |                                                                        |

|        |            |       |       |       |       |       |        |        |        |        |                                                                  |
|--------|------------|-------|-------|-------|-------|-------|--------|--------|--------|--------|------------------------------------------------------------------|
| 320549 | DRErd577e  | -0.03 | 0.02  | -0.01 | -0.08 | -0.07 | 0.6448 | 0.6113 | 0.6200 | 0.2735 | 0.2857 DNA segment, Chr 5, ERATO Dcl 577, expressed              |
| 32061  | DRErd579e  | -0.28 | 0.38  | 0.05  | -0.43 | -0.42 | 0.4089 | 0.1794 | 0.6102 | 0.0621 | 0.0322 DNA segment, Chr 5, ERATO Dcl 579, expressed              |
| 32061  | DRErd579e  | -0.14 | 0.58  | 1.22  | 0.95  | 1.46  | 0.5990 | 0.0943 | 0.0073 | 0.0030 | 0.0001 DNA segment, Chr 5, ERATO Dcl 579, expressed              |
| 32061  | DRErd579e  | -0.03 | 0.09  | -0.01 | -0.06 | 0.00  | 0.6335 | 0.2779 | 0.6360 | 0.3829 | 0.2746 DNA segment, Chr 5, ERATO Dcl 579, expressed              |
| 32061  | DRErd579e  | -0.05 | -0.81 | -0.99 | -0.84 | -0.79 | 0.6432 | 0.0002 | 0.0004 | 0.0023 | 0.0003 DNA segment, Chr 5, ERATO Dcl 579, expressed              |
| 32061  | DRErd579e  | -0.02 | -0.03 | 0.07  | -0.04 | -0.06 | 0.6566 | 0.5613 | 0.0402 | 0.4738 | 0.3280 DNA segment, Chr 5, ERATO Dcl 579, expressed              |
| 71782  | DRErd585e  | 0.35  | -0.32 | -0.07 | 0.14  | 0.25  | 0.2016 | 0.0062 | 0.3326 | 0.4353 | 0.0404 DNA segment, Chr 5, ERATO Dcl 585, expressed              |
| 52409  | DRErd798e  | -0.06 | -0.04 | 0.05  | -0.04 | -0.05 | 0.5631 | 0.3259 | 0.5949 | 0.2985 | 0.3448 DNA segment, Chr 5, ERATO Dcl 585, expressed              |
| 28042  | DWYsu177e  | -0.71 | 0.09  | 0.06  | -0.26 | -0.29 | 0.5223 | 0.4762 | 0.5429 | 0.4083 | 0.3275 DNA segment, Chr 5, ERATO Dcl 798, expressed              |
| 28042  | DWYsu178e  | -0.06 | -0.05 | -0.07 | -0.12 | -0.18 | 0.5747 | 0.6477 | 0.6048 | 0.0902 | 0.0175 DNA segment, Chr 5, Wayne State University 178, expressed |
| 28042  | DWYsu178e  | 0.10  | 0.36  | 0.06  | -0.17 | -0.12 | 0.5801 | 0.2608 | 0.6241 | 0.2040 | 0.2592 DNA segment, Chr 5, Wayne State University 178, expressed |
| 52223  | DRErd160e  | -0.08 | 0.13  | 0.09  | -0.01 | 0.03  | 0.6219 | 0.5702 | 0.6059 | 0.5325 | 0.2371 DNA segment, Chr 5, Wayne State University 163, expressed |
| 52372  | DRErd527e  | 0.20  | -0.07 | -0.03 | 0.13  | 0.17  | 0.2535 | 0.4540 | 0.5378 | 0.1566 | 0.3602 DNA segment, Chr 6, ERATO Dcl 160, expressed              |
| 110958 | D6Mn5e     | -0.58 | 0.55  | 0.50  | 0.39  | 0.08  | 0.4058 | 0.1708 | 0.1329 | 0.2404 | 0.4302 DNA segment, Chr 6, Miriam Meisler 5, expressed           |
| 28006  | D6Wsu116e  | -0.01 | 0.78  | 0.42  | -0.20 | 0.46  | 0.6951 | 0.0682 | 0.3405 | 0.2178 | 0.0065 DNA segment, Chr 6, Wayne State University 116, expressed |
| 28040  | D6Wsu163e  | 0.01  | -1.19 | -1.50 | -0.60 | -0.76 | 0.2133 | 0.0018 | 0.0001 | 0.0081 | 0.0008 DNA segment, Chr 6, Wayne State University 163, expressed |
| 28040  | D6Wsu163e  | 0.42  | -0.03 | -0.03 | -0.05 | -0.06 | 0.5063 | 0.6240 | 0.4558 | 0.3672 | 0.2437 DNA segment, Chr 6, Wayne State University 163, expressed |
| 27999  | D6Wsu176e  | 0.65  | -0.65 | -0.63 | 0.12  | 0.23  | 0.1270 | 0.0612 | 0.0114 | 0.3672 | 0.1419 DNA segment, Chr 6, Wayne State University 176, expressed |
| 52325  | DYErdd13e  | 0.06  | -0.02 | -0.07 | 0.04  | 0.04  | 0.4991 | 0.5845 | 0.5633 | 0.4952 | 0.0198 DNA segment, Chr 6, Wayne State University 176, expressed |
| 52480  | DYErdd175e | 0.14  | 0.07  | -0.08 | 0.02  | 0.38  | 0.3992 | 0.4282 | 0.3688 | 0.5157 | 0.3473 DNA segment, Chr 7, ERATO Dcl 413, expressed              |
| 101994 | DRErd437e  | -0.21 | 0.05  | 0.07  | 0.03  | 0.04  | 0.4444 | 0.5917 | 0.4199 | 0.5241 | 0.0279 DNA segment, Chr 7, ERATO Dcl 413, expressed              |
| 101994 | DRErd437e  | 0.23  | 0.16  | 0.28  | 0.10  | 0.09  | 0.4217 | 0.5267 | 0.6404 | 0.1299 | 0.0279 DNA segment, Chr 8, ERATO Dcl 457, expressed              |
| 244418 | D8Erd082e  | -0.34 | 0.03  | 0.27  | 0.10  | -0.25 | 0.2697 | 0.6470 | 0.0147 | 0.0045 | 0.0001 DNA segment, Chr 8, ERATO Dcl 738, expressed              |
| 244418 | D8Erd082e  | -0.09 | 0.15  | 0.05  | -0.19 | -0.05 | 0.4954 | 0.6324 | 0.2530 | 0.3944 | 0.4635 DNA segment, Chr 8, ERATO Dcl 82, expressed               |
| 244418 | DRErd280e  | -0.04 | -0.03 | 0.06  | 0.01  | 0.02  | 0.5939 | 0.5568 | 0.4086 | 0.5332 | 0.4392 DNA segment, Chr 8, ERATO Dcl 82, expressed               |
| 272636 | DRErd280e  | 0.63  | -0.75 | -1.03 | -0.43 | -0.54 | 0.1146 | 0.0080 | 0.0066 | 0.0522 | 0.0054 DNA segment, Chr 8, ERATO Dcl 280, expressed              |
| 382117 | DRErd402e  | -0.02 | -0.11 | -0.06 | -0.13 | -0.09 | 0.6644 | 0.4711 | 0.5732 | 0.0822 | 0.1719 DNA segment, Chr 9, ERATO Dcl 280, expressed              |
| 382117 | DRErd402e  | 0.22  | -0.12 | -0.02 | 0.09  | 0.11  | 0.2693 | 0.2263 | 0.4270 | 0.2496 | 0.1243 DNA segment, Chr 9, ERATO Dcl 402, expressed              |
| 774405 | DXBay18    | -0.10 | -0.14 | -0.30 | 0.10  | 0.09  | 0.5966 | 0.6166 | 0.4907 | 0.2710 | 0.2940 DNA segment, Chr 9, ERATO Dcl 402, expressed              |
| 574405 | DXBay18    | -0.62 | 0.52  | 0.67  | -0.02 | 0.12  | 0.1544 | 0.2766 | 0.0768 | 0.5378 | 0.2841 DNA segment, Chr X, Baylor 18                             |
| 27528  | D0H4S114   | -0.17 | 0.16  | 0.35  | 0.21  | 0.49  | 0.4249 | 0.5887 | 0.2597 | 0.1251 | 0.0008 DNA segment, Chr X, Baylor 18                             |
| 27528  | D0H4S114   | 0.55  | -0.26 | 0.06  | 0.33  | 0.43  | 0.2086 | 0.4729 | 0.5501 | 0.0476 | 0.0262 DNA segment, human D4S114                                 |
| 27528  | D0H4S114   | 0.62  | -0.35 | -0.05 | 0.08  | 0.25  | 0.2261 | 0.5563 | 0.4488 | 0.5490 | 0.1367 DNA segment, human D4S114                                 |
| 108161 | D0H6S2654E | 0.05  | -0.89 | 0.06  | 0.01  | -0.04 | 0.5958 | 0.4066 | 0.6274 | 0.4971 | 0.3025 DNA segment, human D6S2654E                               |
| 108161 | D0H6S2654E | -0.03 | -0.02 | 0.05  | -0.03 | -0.05 | 0.6293 | 0.6107 | 0.4431 | 0.4971 | 0.3433 DNA segment, human D6S2654E                               |
| 72493  | D0K4S12    | -0.06 | 0.00  | 0.02  | -0.01 | -0.06 | 0.5873 | 0.6499 | 0.5930 | 0.5428 | 0.0322 DNA segment, human DXS9928E                               |
| 72960  | Top1mt     | -0.83 | 0.51  | -0.03 | -0.31 | -0.84 | 0.2883 | 0.1668 | 0.4421 | 0.1312 | 0.3384 DNA segment, KIST 2                                       |
| 68817  | Ddl2       | -0.47 | 0.28  | 0.27  | -0.03 | 0.31  | 0.3145 | 0.1534 | 0.1634 | 0.5249 | 0.0002 DNA topoisomerase 1, mitochondria                         |
| 13198  | Ddl3       | 0.29  | -0.50 | -0.78 | -0.42 | -0.41 | 0.3562 | 0.0308 | 0.0021 | 0.0578 | 0.1339 DNA-damage inducible protein 2                            |
| 74747  | Ddl4       | -0.74 | 1.62  | 1.49  | 1.44  | 1.53  | 0.3478 | 0.0166 | 0.0131 | 0.3604 | 0.0191 DNA-damage inducible transcript 3                         |
| 73284  | Ddl4       | 0.09  | -0.69 | -0.68 | -0.34 | -0.35 | 0.3606 | 0.5830 | 0.1212 | 0.3604 | 0.0000 DNA-damage-inducible transcript 4                         |
| 73284  | Ddl4       | 0.03  | 0.06  | -0.34 | -0.29 | -0.59 | 0.5586 | 0.0016 | 0.0009 | 0.0644 | 0.0041 DNA-damage-inducible transcript 4-like                    |
| 15502  | Dnaj1      | 0.67  | -0.38 | -0.49 | -0.09 | -0.29 | 0.6831 | 0.5337 | 0.1180 | 0.3458 | 0.0045 DNA-damage-inducible transcript 4-like                    |
| 15502  | Dnaj1      | 0.86  | -0.66 | -1.05 | -0.31 | -0.29 | 0.0655 | 0.0552 | 0.0157 | 0.3879 | 0.0456 DnaI (Hsp40) homolog, subfamily A, member 1               |
| 56445  | Dnaj2      | 0.39  | 0.02  | -0.01 | 0.14  | 0.24  | 0.1066 | 0.1518 | 0.0150 | 0.1281 | 0.0948 DnaI (Hsp40) homolog, subfamily A, member 1               |
| 83945  | Dnaj3      | 0.51  | -0.40 | -0.37 | 0.33  | 0.16  | 0.1611 | 0.0810 | 0.1492 | 0.1033 | 0.0005 DnaI (Hsp40) homolog, subfamily A, member 1               |
| 58233  | Dnaj4      | -0.36 | -0.24 | -0.69 | -0.08 | -0.64 | 0.5805 | 0.5108 | 0.6250 | 0.4416 | 0.0715 DnaI (Hsp40) homolog, subfamily A, member 2               |
| 58233  | Dnaj4      | 0.81  | -0.71 | -0.66 | 0.04  | 0.20  | 0.0770 | 0.0199 | 0.0193 | 0.0229 | 0.1882 DnaI (Hsp40) homolog, subfamily A, member 3               |
| 81489  | Dnaj1      | 0.38  | -1.31 | -1.87 | -1.11 | -1.28 | 0.5689 | 0.6425 | 0.5205 | 0.5228 | 0.0030 DnaI (Hsp40) homolog, subfamily A, member 3               |
| 81489  | Dnaj1      | 0.29  | -0.08 | 0.53  | 0.99  | 1.67  | 0.5825 | 0.4925 | 0.1943 | 0.0041 | 0.3175 DnaI (Hsp40) homolog, subfamily A, member 4               |
| 56709  | Dnaj12     | -0.19 | 0.07  | -0.53 | -0.05 | -0.87 | 0.3798 | 0.3872 | 0.0185 | 0.0040 | 0.0000 DnaI (Hsp40) homolog, subfamily B, member 1               |
| 56709  | Dnaj12     | -0.41 | 0.81  | 0.61  | -0.03 | 0.00  | 0.3846 | 0.1156 | 0.1748 | 0.5170 | 0.0001 DnaI (Hsp40) homolog, subfamily B, member 1               |
| 15504  | Dnaj3      | 0.25  | 0.26  | -0.11 | 0.09  | 0.01  | 0.6499 | 0.1463 | 0.0523 | 0.0762 | 0.0001 DnaI (Hsp40) homolog, subfamily B, member 1               |
| 67035  | Dnaj4      | 0.78  | 0.12  | 0.58  | 0.82  | 1.03  | 0.0840 | 0.6532 | 0.1476 | 0.0030 | 0.4827 DnaI (Hsp40) homolog, subfamily B, member 12              |
| 67035  | Dnaj4      | 0.33  | 0.47  | 1.20  | 1.32  | 1.71  | 0.5669 | 0.2226 | 0.0492 | 0.0010 | 0.0002 DnaI (Hsp40) homolog, subfamily B, member 3               |
| 56323  | Dnaj5      | -0.03 | -0.04 | -0.04 | 0.08  | 0.03  | 0.6047 | 0.4873 | 0.4670 | 0.3950 | 0.0000 DnaI (Hsp40) homolog, subfamily B, member 4               |
| 56323  | Dnaj5      | 0.16  | 0.76  | 0.48  | 0.65  | 0.70  | 0.5350 | 0.0784 | 0.3081 | 0.0064 | 0.3567 DnaI (Hsp40) homolog, subfamily B, member 4               |
| 56323  | Dnaj5      | -0.01 | 0.31  | 0.25  | 0.47  | 0.35  | 0.6858 | 0.0667 | 0.0663 | 0.0005 | 0.0095 DnaI (Hsp40) homolog, subfamily B, member 5               |
| 23950  | Dnaj6      | 0.87  | -0.17 | -0.05 | 0.27  | 0.82  | 0.0897 | 0.3121 | 0.4209 | 0.0023 | 0.0001 DnaI (Hsp40) homolog, subfamily B, member 5               |
| 23950  | Dnaj6      | -0.38 | 0.78  | 0.83  | -0.27 | -0.03 | 0.6574 | 0.3332 | 0.3110 | 0.0676 | 0.0008 DnaI (Hsp40) homolog                                      |

|           |         |       |       |       |       |       |        |        |        |        |                                                          |
|-----------|---------|-------|-------|-------|-------|-------|--------|--------|--------|--------|----------------------------------------------------------|
| 69408     | Dnajc17 | -0.06 | 0.70  | 0.50  | 0.16  | 0.43  | 0.6644 | 0.2359 | 0.4083 | 0.3640 | 0.0683 DnaI (Hsp40) homolog, subfamily C, member 17      |
| 76594     | Dnajc18 | -0.13 | 0.12  | -0.15 | -0.44 | -0.57 | 0.5396 | 0.6168 | 0.3213 | 0.0040 | 0.0005 DnaI (Hsp40) homolog, subfamily C, member 18      |
| 76594     | Dnajc18 | 0.04  | -0.07 | -0.05 | -0.06 | -0.04 | 0.6033 | 0.4216 | 0.4464 | 0.3971 | 0.4684 DnaI (Hsp40) homolog, subfamily C, member 18      |
| 67713     | Dnajc19 | -0.37 | 0.28  | -0.07 | -0.29 | -0.51 | 0.2062 | 0.2102 | 0.6238 | 0.1241 | 0.0040 DnaI (Hsp40) homolog, subfamily C, member 19      |
| 67713     | Dnajc19 | 0.35  | -0.54 | -0.69 | -0.18 | -0.22 | 0.2514 | 0.0648 | 0.0234 | 0.2118 | 0.1356 DnaI (Hsp40) homolog, subfamily C, member 19      |
| 67713     | Dnajc19 | 0.11  | -0.04 | -0.44 | -0.15 | -0.49 | 0.5825 | 0.4197 | 0.0349 | 0.3291 | 0.0041 DnaI (Hsp40) homolog, subfamily C, member 19      |
| 22791     | Dnajc2  | -0.51 | 0.47  | -0.10 | -0.57 | -0.65 | 0.2184 | 0.2122 | 0.3414 | 0.0490 | 0.0128 DnaI (Hsp40) homolog, subfamily C, member 2       |
| 22791     | Dnajc2  | -0.40 | 0.36  | -0.40 | -0.80 | -0.68 | 0.3693 | 0.5243 | 0.1172 | 0.0048 | 0.0234 DnaI (Hsp40) homolog, subfamily C, member 2       |
| 78244     | Dnajc21 | 0.50  | 0.20  | 0.29  | 0.29  | 0.54  | 0.1874 | 0.5884 | 0.4636 | 0.1010 | 0.0037 DnaI (Hsp40) homolog, subfamily C, member 21      |
| 100037258 | Dnajc3a | 0.25  | 0.30  | 0.35  | -0.02 | 0.44  | 0.4451 | 0.5255 | 0.4309 | 0.5468 | 0.0020 DnaI (Hsp40) homolog, subfamily C, member 3A      |
| 100037258 | Dnajc3a | 0.15  | 0.27  | 0.26  | -0.33 | 0.07  | 0.5801 | 0.5889 | 0.5875 | 0.2074 | 0.4391 DnaI (Hsp40) homolog, subfamily C, member 3A      |
| 100037258 | Dnajc3a | -0.16 | 0.24  | 0.80  | 0.30  | 0.62  | 0.5887 | 0.2539 | 0.0228 | 0.0278 | 0.0001 DnaI (Hsp40) homolog, subfamily C, member 3A      |
| 57431     | Dnajc3a | -0.19 | 0.14  | 0.11  | 0.00  | 0.33  | 0.6316 | 0.3570 | 0.3379 | 0.5616 | 0.0334 DnaI (Hsp40) homolog, subfamily C, member 3A      |
| 13002     | Dnajc5  | 0.07  | -0.04 | 0.00  | 0.03  | -0.15 | 0.6431 | 0.3619 | 0.4325 | 0.5187 | 0.2342 DnaI (Hsp40) homolog, subfamily C, member 4       |
| 13002     | Dnajc5  | 0.45  | -0.56 | 0.02  | 0.37  | 0.52  | 0.2619 | 0.0325 | 0.5309 | 0.1289 | 0.0147 DnaI (Hsp40) homolog, subfamily C, member 5       |
| 13002     | Dnajc5  | -1.33 | 0.78  | 0.62  | -0.21 | -0.15 | 0.3007 | 0.1545 | 0.1693 | 0.3442 | 0.3361 DnaI (Hsp40) homolog, subfamily C, member 5       |
| 66326     | Dnajc5b | 0.04  | 0.10  | 0.31  | 0.19  | 0.39  | 0.6115 | 0.5528 | 0.1861 | 0.1429 | 0.0031 DnaI (Hsp40) homolog, subfamily C, member 5       |
| 66326     | Dnajc5b | 0.06  | -0.05 | 0.00  | 0.05  | 0.11  | 0.5396 | 0.4968 | 0.6379 | 0.3673 | 0.1332 DnaI (Hsp40) homolog, subfamily C, member 5 beta  |
| 231098    | Dnajc5g | 0.14  | -0.08 | 0.02  | 0.04  | 0.03  | 0.7032 | 0.6554 | 0.4811 | 0.1754 | 0.3472 DnaI (Hsp40) homolog, subfamily C, member 5 beta  |
| 231098    | Dnajc5g | 0.00  | 0.01  | -0.03 | -0.09 | 0.04  | 0.3930 | 0.2452 | 0.5019 | 0.3679 | 0.3973 DnaI (Hsp40) homolog, subfamily C, member 5 gamma |
| 72085     | Dnajc6  | -0.07 | -0.33 | -0.43 | -0.04 | -0.17 | 0.6080 | 0.6013 | 0.5462 | 0.4181 | 0.0759 DnaI (Hsp40) homolog, subfamily C, member 5 gamma |
| 56354     | Dnajc7  | -0.12 | 0.58  | -0.12 | 0.13  | -0.18 | 0.6253 | 0.3954 | 0.2130 | 0.1037 | 0.0152 DnaI (Hsp40) homolog, subfamily C, member 6       |
| 68598     | Dnajc7  | 0.41  | -0.04 | 0.13  | 0.40  | 0.94  | 0.5623 | 0.0915 | 0.3749 | 0.2833 | 0.1785 DnaI (Hsp40) homolog, subfamily C, member 7       |
| 68598     | Dnajc7  | 0.04  | -0.05 | 0.00  | 0.05  | 0.11  | 0.2835 | 0.4939 | 0.6367 | 0.0834 | 0.0004 DnaI (Hsp40) homolog, subfamily C, member 8       |

|        |         |       |       |       |       |       |        |        |        |        |                                                                        |
|--------|---------|-------|-------|-------|-------|-------|--------|--------|--------|--------|------------------------------------------------------------------------|
| 242620 | Dmra2   | 0.07  | -0.01 | -0.02 | 0.10  | 0.07  | 0.4645 | 0.6299 | 0.5795 | 0.2083 | 0.2267 doublesex and mab-3 related transcription factor like family A2 |
| 71241  | Dmrc2   | -0.02 | -0.01 | -0.04 | -0.06 | -0.03 | 0.6459 | 0.5940 | 0.3808 | 0.3474 | 0.3873 doublesex and mab-3 related transcription factor like family C2 |
| 13508  | Dcam    | -0.01 | -0.04 | -0.09 | -0.01 | -0.03 | 0.4277 | 0.3949 | 0.2307 | 0.5352 | 0.3953 Down syndrome cell adhesion molecule                            |
| 13508  | Dcam    | 0.04  | 0.05  | -0.04 | -0.04 | -0.01 | 0.4974 | 0.4974 | 0.4936 | 0.4641 | 0.4696 Down syndrome cell adhesion molecule                            |
| 114873 | Dscam1  | 0.09  | 0.01  | 0.02  | 0.16  | 0.08  | 0.6462 | 0.6038 | 0.6085 | 0.0885 | 0.1973 Down syndrome cell adhesion molecule-like 1                     |
| 114873 | Dscam1  | -0.08 | 0.01  | 0.06  | -0.09 | -0.13 | 0.5146 | 0.5544 | 0.6289 | 0.3076 | 0.0938 Down syndrome cell adhesion molecule-like 1                     |
| 114873 | Dscam1  | -0.05 | 0.12  | 0.15  | 0.03  | 0.05  | 0.5479 | 0.2170 | 0.1841 | 0.4525 | 0.2831 Down syndrome cell adhesion molecule-like 1                     |
| 114873 | Dscam1  | 0.05  | 0.06  | 0.07  | -0.02 | 0.03  | 0.5488 | 0.5375 | 0.5013 | 0.5167 | 0.3730 Down syndrome cell adhesion molecule-like 1                     |
| 114873 | Dscam1  | 0.08  | -0.04 | -0.16 | -0.02 | -0.22 | 0.6514 | 0.3852 | 0.5475 | 0.5246 | 0.1347 Down syndrome cell adhesion molecule-like 1                     |
| 13185  | Dscr3   | -0.36 | -0.79 | 0.15  | -1.08 | -1.50 | 0.2321 | 0.0088 | 0.0002 | 0.0001 | 0.0000 Down syndrome critical region gene 3                            |
| 84652  | Dctmb1a | -0.04 | 0.08  | 0.09  | 0.06  | 0.10  | 0.3463 | 0.3520 | 0.3535 | 0.3535 | 0.1969 down-regulated by Cinnb1, a                                     |
| 84652  | Dctmb1a | 0.11  | -0.90 | -1.10 | -0.34 | -0.93 | 0.6763 | 0.6185 | 0.5421 | 0.1376 | 0.0008 down-regulated by Cinnb1, a                                     |
| 13486  | Drl     | 0.57  | -0.34 | -0.06 | 0.18  | 0.61  | 0.2697 | 0.0949 | 0.4809 | 0.2261 | 0.0009 down-regulator of transcription 1                               |
| 13486  | Drl     | 0.17  | 0.00  | 0.12  | -0.11 | 0.25  | 0.2707 | 0.5728 | 0.4172 | 0.1532 | 0.0195 down-regulator of transcription 1                               |
| 60364  | Donsen  | 0.20  | -0.31 | -0.51 | -0.17 | -0.25 | 0.2479 | 0.0316 | 0.0057 | 0.0949 | 0.0065 downstream neighbor of SON                                      |
| 60364  | Donsen  | 0.44  | -0.79 | -0.90 | -0.49 | -0.53 | 0.2649 | 0.0139 | 0.0040 | 0.0163 | 0.0014 downstream neighbor of SON                                      |
| 216164 | Dos     | 0.10  | 0.30  | 0.43  | 0.30  | 0.09  | 0.5944 | 0.5183 | 0.2909 | 0.0243 | 0.2513 downstream of Skt11                                             |
| 116905 | Dph1    | -0.21 | 0.00  | -0.19 | -0.03 | -0.12 | 0.3901 | 0.3604 | 0.0828 | 0.5348 | 0.3064 DPH1 homolog (S. cerevisiae)                                    |
| 105638 | Dph1    | 0.00  | 0.03  | 0.02  | 0.02  | 0.14  | 0.7013 | 0.5410 | 0.5511 | 0.5134 | 0.2017 DPH1 homolog (S. cerevisiae)                                    |
| 67728  | Dph2    | 0.35  | -1.30 | 0.39  | 0.08  | 0.41  | 0.5609 | 0.3713 | 0.3920 | 0.4487 | 0.0183 DPH2 homolog (S. cerevisiae)                                    |
| 105638 | Dph3    | 0.16  | 0.47  | 0.39  | 0.08  | 0.41  | 0.5646 | 0.0766 | 0.0998 | 0.3781 | 0.0027 DPH3 homolog (KT111, S. cerevisiae)                             |
| 99349  | Dph3    | -0.12 | 0.81  | 0.49  | 0.12  | 0.19  | 0.5751 | 0.1708 | 0.0208 | 0.0032 | 0.1742 DPH3 homolog (KT111, S. cerevisiae)                             |
| 99349  | Dph3    | 0.28  | 0.11  | 0.25  | 0.45  |       |        |        |        |        |                                                                        |

|        |        |       |       |       |       |        |        |        |        |                                                                                |
|--------|--------|-------|-------|-------|-------|--------|--------|--------|--------|--------------------------------------------------------------------------------|
| 67446  | Dusp28 | 0.05  | -0.03 | -0.07 | -0.19 | 0.6578 | 0.4979 | 0.4526 | 0.4117 | 0.1628 dual specificity phosphatase 28                                         |
| 72349  | Dusp3  | -1.59 | 0.06  | -0.74 | -1.56 | 0.1942 | 0.0765 | 0.4964 | 0.2690 | 0.0147 dual specificity phosphatase 3 (vaccinia virus phosphatase VH1-related) |
| 319520 | Dusp4  | 0.70  | 0.49  | 0.56  | 1.13  | 0.1334 | 0.5105 | 0.2958 | 0.0070 | 0.0001 dual specificity phosphatase 4                                          |
| 319520 | Dusp4  | 0.30  | 0.54  | 0.79  | 0.55  | 0.1882 | 0.1882 | 0.0294 | 0.0009 | 0.0000 dual specificity phosphatase 4                                          |
| 67603  | Dusp6  | -0.51 | -0.12 | -0.81 | -0.76 | 0.3459 | 0.4272 | 0.5567 | 0.0023 | 0.0110 dual specificity phosphatase 6                                          |
| 235584 | Dusp7  | -0.34 | -0.11 | -0.72 | -0.83 | 0.4191 | 0.4650 | 0.5488 | 0.0019 | 0.0000 dual specificity phosphatase 7                                          |
| 182    |        |       |       |       |       |        |        |        |        |                                                                                |



































































































































































































































































































































































































































































































































































|        |         |       |       |       |       |        |        |        |        |                                                                            |
|--------|---------|-------|-------|-------|-------|--------|--------|--------|--------|----------------------------------------------------------------------------|
| 22099  | Tsn     | -0.21 | -0.27 | -0.39 | -0.29 | 0.2977 | 0.3757 | 0.1540 | 0.0118 | 0.0048 translin                                                            |
| 22099  | Tsn     | -0.05 | -0.04 | -0.04 | 0.04  | 0.5949 | 0.6489 | 0.3444 | 0.4416 | 0.4051 translin                                                            |
| 22099  | Tsn     | 0.02  | -0.10 | -0.10 | 0.30  | 0.6702 | 0.3851 | 0.3264 | 0.3931 | 0.0724 translin                                                            |
| 22099  | Tsn     | 0.05  | -0.21 | -0.29 | -0.14 | 0.6902 | 0.2385 | 0.1246 | 0.0268 | 0.2128 translin                                                            |
| 53424  | Tsnax1  | -0.22 | -0.16 | -0.06 | 0.40  | 0.6350 | 0.4838 | 0.4205 | 0.0082 | 0.0021 translin-associated factor X                                        |
| 72236  | Tsnaxp  | 0.23  | -0.42 | -0.75 | -0.38 | 0.2522 | 0.0096 | 0.0004 | 0.0067 | 0.0001 translin-associated factor X (Tsnax) interacting protein 1          |
| 30059  | Timm10  | -0.72 | 0.33  | -0.22 | -0.38 | 0.2727 | 0.2277 | 0.5807 | 0.0071 | 0.0004 translocase of inner mitochondrial membrane 13 homolog (yeast)      |
| 30059  | Timm13  | -0.21 | 0.03  | -0.53 | -0.65 | 0.4938 | 0.6252 | 0.0529 | 0.0148 | 0.0014 translocase of inner mitochondrial membrane 13 homolog (yeast)      |
| 30055  | Timm13  | -0.08 | -0.23 | -0.72 | -0.61 | 0.6205 | 0.1905 | 0.0132 | 0.2092 | 0.0014 translocase of inner mitochondrial membrane 17a                     |
| 21854  | Timm17a | 0.22  | -0.16 | 0.17  | 0.23  | 0.5110 | 0.2716 | 0.6338 | 0.0078 | 0.0072 translocase of inner mitochondrial membrane 17a                     |
| 21854  | Timm17a | -0.29 | -0.52 | -0.22 | -0.05 | 0.5880 | 0.6552 | 0.1512 | 0.4678 | 0.2441 translocase of inner mitochondrial membrane 17a                     |
| 21854  | Timm17b | -0.24 | 0.06  | -0.14 | -0.20 | 0.1637 | 0.1600 | 0.5573 | 0.1541 | 0.0318 translocase of inner mitochondrial membrane 17b                     |
| 21855  | Timm17b | -0.39 | -0.15 | -0.36 | -0.83 | 0.3514 | 0.6261 | 0.6206 | 0.0061 | 0.0000 translocase of inner mitochondrial membrane 17b                     |
| 21855  | Timm17b | 0.24  | -0.01 | -0.13 | 0.03  | 0.5073 | 0.4441 | 0.3470 | 0.5359 | 0.0000 translocase of inner mitochondrial membrane 17b                     |
| 21855  | Timm17b | -0.11 | -0.07 | -0.21 | -0.19 | 0.5768 | 0.4821 | 0.2690 | 0.2160 | 0.0051 translocase of inner mitochondrial membrane 17b                     |
| 56322  | Timm22  | -0.03 | -0.21 | -0.25 | -0.39 | 0.3186 | 0.3730 | 0.5159 | 0.0546 | 0.0046 translocase of inner mitochondrial membrane 22 homolog (yeast)      |
| 53600  | Timm23  | 0.59  | 0.17  | 0.40  | 0.51  | 0.6335 | 0.1023 | 0.2843 | 0.5646 | 0.0037 translocase of inner mitochondrial membrane 23 homolog (yeast)      |
| 66525  | Timm44  | -0.87 | 0.09  | -0.04 | -0.16 | 0.4175 | 0.3772 | 0.4017 | 0.5147 | 0.1652 translocase of inner mitochondrial membrane 44                      |
| 21856  | Timm50  | -0.97 | 0.09  | -0.03 | -0.17 | 0.3045 | 0.3261 | 0.3225 | 0.2680 | 0.0174 translocase of inner mitochondrial membrane 50 homolog (yeast)      |
| 66525  | TimmBa1 | -0.87 | 0.15  | 0.11  | -0.47 | 0.3045 | 0.3261 | 0.3225 | 0.2680 | 0.1430 translocase of inner mitochondrial membrane 8 homolog a1 (yeast)    |
| 30058  | TimmBa1 | 0.65  | -0.50 | -0.48 | 0.01  | 0.1580 | 0.0433 | 0.0693 | 0.5561 | 0.3533 translocase of inner mitochondrial membrane 8 homolog a1 (yeast)    |
| 22362  | TimmBa2 | 0.10  | -0.12 | -0.07 | 0.01  | 0.3728 | 0.2992 | 0.3682 | 0.3037 | 0.0006 translocase of inner mitochondrial membrane 8 homolog b (yeast)     |
| 30057  | Timm8b  | 0.54  | -0.94 | -0.47 | -0.82 | 0.1650 | 0.0112 | 0.0011 | 0.0296 | 0.0131 translocase of inner mitochondrial membrane 8 homolog b (yeast)     |
| 30056  | Timm9   | -0.09 | 0.01  | 0.02  | -0.01 | 0.6179 | 0.4556 | 0.0431 | 0.1104 | 0.3653 translocase of inner mitochondrial membrane 9 homolog (yeast)       |
| 30056  | Timm9   | 0.11  | -0.62 | -0.40 | -0.52 | 0.5377 | 0.0325 | 0.0020 | 0.0149 | 0.0014 translocase of inner mitochondrial membrane 9 homolog (yeast)       |
| 30056  | Timm9   | -0.14 | 0.11  | -0.06 | 0.07  | 0.5723 | 0.6289 | 0.3471 | 0.4327 | 0.0093 translocase of inner mitochondrial membrane 9 homolog (yeast)       |
| 67952  | Timm20  | 0.40  | -0.05 | 0.10  | 0.27  | 0.3505 | 0.5245 | 0.6270 | 0.2448 | 0.0815 translocase of inner mitochondrial membrane 20 homolog (yeast)      |
| 67952  | Timm20  | 0.27  | -0.38 | -0.32 | -0.22 | 0.4165 | 0.2314 | 0.0691 | 0.0296 | 0.0235 translocase of inner mitochondrial membrane 22 homolog (yeast)      |
| 223696 | Tomm22  | -1.09 | -0.25 | -0.54 | -0.35 | 0.0658 | 0.2081 | 0.0403 | 0.0266 | 0.0000 translocase of outer mitochondrial membrane 22 homolog (yeast)      |
| 67145  | Tomm34  | 0.55  | 0.01  | 0.42  | 0.79  | 0.0853 | 0.5752 | 0.1622 | 0.0009 | 0.0000 translocase of outer mitochondrial membrane 34                      |
| 67145  | Tomm34  | -0.31 | 0.63  | 0.41  | 0.01  | 0.4365 | 0.2579 | 0.3150 | 0.5485 | 0.3927 translocase of outer mitochondrial membrane 34                      |
| 53333  | Tomm40  | 0.44  | -0.15 | 0.23  | 0.45  | 0.2129 | 0.3135 | 0.5553 | 0.0127 | 0.0002 translocase of outer mitochondrial membrane 40 homolog (yeast)      |
| 641376 | Tomm40  | -0.29 | 0.75  | 0.19  | -0.52 | 0.4985 | 0.2322 | 0.6281 | 0.0830 | 0.0106 translocase of outer mitochondrial membrane 40 homolog-like (yeast) |
| 66169  | Tomm70a | -0.09 | -0.54 | -0.67 | -0.65 | 0.3174 | 0.1508 | 0.0240 | 0.0042 | 0.0001 translocase of outer mitochondrial membrane 7 homolog (yeast)       |
| 28185  | Tomm70a | 0.40  | 0.30  | 0.52  | 0.62  | 0.6174 | 0.5269 | 0.2365 | 0.0012 | 0.0004 translocase of outer mitochondrial membrane 7 homolog A (yeast)     |
| 28185  | Tomm70a | -0.61 | -0.37 | -0.44 | -0.26 | 0.4820 | 0.5698 | 0.5803 | 0.1940 | 0.0107 translocase of outer mitochondrial membrane 70 homolog A (yeast)    |
| 28185  | Tomm70a | -0.45 | -0.38 | -0.52 | -0.40 | 0.5010 | 0.6039 | 0.6321 | 0.0382 | 0.0176 translocase of outer mitochondrial membrane 70 homolog A (yeast)    |
| 28185  | Tomm70a | 0.00  | -0.03 | -0.11 | -0.06 | 0.6985 | 0.4936 | 0.4952 | 0.1372 | 0.2398 translocase of outer mitochondrial membrane 70 homolog A (yeast)    |
| 109899 | Tpr     | -0.19 | -0.03 | 0.14  | -0.33 | 0.4042 | 0.5752 | 0.4753 | 0.0368 | 0.1970 translocated promoter region                                        |
| 72265  | Tram1   | -0.08 | -0.16 | -0.24 | -0.85 | 0.6311 | 0.3297 | 0.2503 | 0.0030 | 0.1887 translocated promoter region                                        |
| 72265  | Tram1   | 0.65  | -0.21 | 0.10  | 0.35  | 0.1192 | 0.3021 | 0.6435 | 0.0095 | 0.0019 translocating chain-associating membrane protein 1                  |
| 72265  | Tram1   | 0.46  | -0.41 | -0.28 | 0.03  | 0.1862 | 0.1338 | 0.1034 | 0.5182 | 0.1250 translocating chain-associating membrane protein 1                  |
| 170929 | Tram2   | -0.10 | -0.13 | 0.28  | 0.35  | 0.6722 | 0.4854 | 0.2611 | 0.0176 | 0.0197 translocating chain-associating membrane protein 1                  |
| 229901 | Tram11  | -0.48 | 0.41  | 0.59  | -0.58 | 0.2732 | 0.4483 | 0.1937 | 0.0091 | 0.0056 translocating chain-associating membrane protein 2                  |
| 69276  | Tloc1   | -0.06 | -0.13 | -0.11 | -0.09 | 0.5887 | 0.5930 | 0.2939 | 0.1846 | 0.2275 translocation associated membrane protein 1-like 1                  |
| 69276  | Tloc1   | 0.43  | -0.50 | -0.54 | -0.22 | 0.0946 | 0.0123 | 0.0046 | 0.0756 | 0.0008 translocation protein 1                                             |
| 12257  | Tspo    | -1.14 | -0.07 | 0.02  | -0.40 | 0.3614 | 0.3549 | 0.4026 | 0.5255 | 0.0528 translocator protein                                                |
| 12257  | Tspo    | -0.84 | 0.11  | -0.01 | 0.03  | 0.3614 | 0.3549 | 0.4026 | 0.5255 | 0.1160 translocator protein                                                |
| 277203 | Tm4s19  | 0.05  | 0.05  | 0.02  | -0.04 | 0.5631 | 0.5577 | 0.5876 | 0.4150 | 0.3983 transmembrane 4 L six family member 19                              |
| 66261  | Tm4s20  | -0.01 | -0.04 | 0.00  | -0.03 | 0.6919 | 0.6263 | 0.3806 | 0.5551 | 0.4569 transmembrane 4 L six family member 20                              |
| 17112  | Tm4s1   | -0.50 | -0.46 | -0.41 | -0.04 | 0.5132 | 0.6209 | 0.5837 | 0.4962 | 0.0715 transmembrane 4 superfamily member 1                                |
| 229302 | Tm4s4   | 0.40  | -0.18 | -0.08 | 0.26  | 0.3729 | 0.2691 | 0.3090 | 0.2218 | 0.4328 transmembrane 4 superfamily member 4                                |
| 75004  | Tm4s5   | -0.05 | 0.09  | 0.10  | 0.00  | 0.5887 | 0.5273 | 0.4748 | 0.2987 | 0.4934 transmembrane 4 superfamily member 5                                |
| 107769 | Tm6s1   | -0.47 | -0.69 | -0.80 | -0.37 | 0.2538 | 0.0044 | 0.0103 | 0.1307 | 0.0812 transmembrane 6 superfamily member 1                                |
| 107769 | Tm6s1   | 0.26  | -0.92 | -0.88 | -0.25 | 0.5373 | 0.2274 | 0.2530 | 0.1200 | 0.0283 transmembrane 6 superfamily member 2                                |
| 107770 | Tm6s2   | 0.02  | -0.02 | 0.11  | 0.06  | 0.6699 | 0.6475 | 0.2805 | 0.5508 | 0.3341 transmembrane 6 superfamily member 2                                |
| 107770 | Tm6s2   | 0.03  | -0.10 | 0.16  | -0.27 | 0.6911 | 0.3797 | 0.5466 | 0.0823 | 0.0030 transmembrane 6 superfamily member 2                                |
| 73166  | Tm7s2   | 0.14  | -0.37 | -0.39 | -0.15 | 0.5696 | 0.1330 | 0.0739 | 0.3277 | 0.2830 transmembrane 7 superfamily member 2                                |
| 67623  | Tm7s3   | -0.55 | 0.06  | -0.33 | -0.42 | 0.1729 | 0.6124 | 0.1075 | 0.0564 | 0.0232 transmembrane 7 superfamily member 3                                |
| 67623  | Tm7s3   | -0.04 | -0.03 | 0.10  | 0.21  | 0.6226 | 0.5792 | 0.4863 | 0.2158 | 0.0081 transmembrane 7 superfamily member 3                                |
| 75766  | Tm7s4   | -0.01 | -0.06 | -0.08 | -0.14 | 0.6748 | 0.4636 | 0.3494 | 0.0837 | 0.3163 transmembrane 7 superfamily member 4                                |
| 74140  | Tm9s1   | 0.24  | 0.12  | 0.02  | -0.05 | 0.2920 | 0.6186 | 0.5823 | 0.4586 | 0.0400 transmembrane 9 superfamily member 1                                |
| 74140  | Tm9s1   | 0.18  | 0.04  | 0.00  | 0.00  | 0.4268 | 0.5442 | 0.4959 | 0.5610 | 0.4576 transmembrane 9 superfamily member 1                                |
| 74140  | Tm9s1   | 0.27  | 0.04  | 0.00  | 0.03  | 0.4389 | 0.5251 | 0.6222 | 0.4646 | 0.1547 transmembrane 9 superfamily member 1                                |
| 74140  | Tm9s1   | -0.45 | 0.20  | 0.18  | -0.04 | 0.4869 | 0.2969 | 0.2984 | 0.5155 | 0.4311 transmembrane 9 superfamily member 1                                |
| 74140  | Tm9s1   | -0.52 | 0.09  | 0.16  | -0.08 | 0.5017 | 0.3676 | 0.3122 | 0.4669 | 0.4311 transmembrane 9 superfamily member 1                                |
| 74140  | Tm9s1   | 0.16  | 0.15  | 0.60  | 0.64  | 0.5062 | 0.4583 | 0.0350 | 0.0023 | 0.0001 transmembrane 9 superfamily member 1                                |
| 74140  | Tm9s1   | -0.66 | 0.13  | 0.09  | 0.02  | 0.5069 | 0.3595 | 0.3495 | 0.5476 | 0.4609 transmembrane 9 superfamily member 1                                |
| 74140  | Tm9s1   | -0.56 | 0.06  | 0.09  | 0.00  | 0.5157 | 0.3817 | 0.3478 | 0.5621 | 0.4209 transmembrane 9 superfamily member 1                                |
| 74140  | Tm9s1   | 0.09  | 0.17  | 0.04  | 0.08  | 0.6041 | 0.4655 | 0.6366 | 0.5089 | 0.3741 transmembrane 9 superfamily member 1                                |
| 74140  | Tm9s1   | 0.02  | 0.21  | 0.16  | 0.03  | 0.6765 | 0.3161 | 0.4297 | 0.5244 | 0.4072 transmembrane 9 superfamily member 1                                |
| 74140  | Tm9s1   | -0.01 | 0.13  | -0.09 | 0.05  | 0.6951 | 0.4036 | 0.4300 | 0.4300 | 0.4170 transmembrane 9 superfamily member 1                                |
| 68059  | Tm9s2   | 0.54  | -0.24 | -0.01 | 0.44  | 0.0472 | 0.4221 | 0.6375 | 0.0136 | 0.0018 transmembrane 9 superfamily member 2                                |
| 68059  | Tm9s2   | 0.01  | 0.15  | 0.12  | -0.49 | 0.6945 | 0.6546 | 0.6082 | 0.0428 | 0.3557 transmembrane 9 superfamily member 2                                |
| 107358 | Tm9s3   | 0.24  | -0.23 | -0.20 | -0.10 | 0.4451 | 0.2490 | 0.3124 | 0.3721 | 0.0807 transmembrane 9 superfamily member 2                                |
| 107358 | Tm9s3   | -0.19 | -0.36 | 0.15  | 0.21  | 0.6306 | 0.5889 | 0.3196 | 0.0742 | 0.0164 transmembrane 9 superfamily member 3                                |
| 99237  | Tm9s4   | -0.11 | 0.16  | 0.09  | -0.08 | 0.3861 | 0.2026 | 0.3181 | 0.2261 | 0.0065 transmembrane 9 superfamily member 3                                |
| 99237  | Tm9s4   | 0.32  | -0.33 | 0.24  | 0.62  | 0.3927 | 0.3036 | 0.5018 | 0.0196 | 0.0065 transmembrane 9 superfamily member 4                                |
| 99237  | Tm9s4   | -0.14 | -0.14 | 0.30  | 0.19  | 0.4975 | 0.6332 | 0.1014 | 0.0799 | 0.0319 transmembrane 9 superfamily member 4                                |
| 330401 | Tmc1    | -0.64 | -0.98 | -1.07 | -1.30 | 0.0946 | 0.0316 | 0.0024 | 0.0000 | 0.0000 transmembrane and coiled coil domains 1                             |
| 330401 | Tmc1    | -0.06 | 0.56  | 1.08  | 0.64  | 0.6549 | 0.0576 | 0.0052 | 0.0005 | 0.0000 transmembrane and coiled coil domains 1                             |
| 319880 | Tmc3    | 0.46  | 1.38  | 2.05  | 1.87  | 0.3754 | 0.0280 | 0.0062 | 0.0001 | 0.0000 transmembrane and coiled coil domains 3                             |
| 319880 | Tmc3    | -0.05 | 1.08  | 1.59  | 1.24  | 0.5951 | 0.0342 | 0.0008 | 0.0029 | 0.0018 transmembrane and coiled coil domains 3                             |
| 319880 | Tmc3    | -0.05 | 1.08  | 1.37  | 0.82  | 0.6529 | 0.0342 | 0.0008 | 0.0029 | 0.0014 transmembrane and coiled coil domains 3                             |
| 68944  | Tmc1    | -0.80 | -0.94 | -1.00 | -0.01 | 0.1511 | 0.0611 | 0.0171 | 0.5562 | 0.4632 transmembrane and coiled-coil domains 1                             |
| 68944  | Tmc1    | -0.02 | -0.01 | 0.09  | 0.06  | 0.6707 | 0.6428 | 0.4133 | 0.3515 | 0.3828 transmembrane and coiled-coil domains 1                             |
| 68944  | Tmc2    | 0.51  | -0.29 | -0.08 | 0.25  | 0.2575 | 0.2896 | 0.5050 | 0.2914 | 0.0287 transmembrane and coiled-coil domains 2                             |
| 68949  | Tmc2    | -0.07 | 0.14  | 0.09  | -0.12 | 0.5011 | 0.2935 | 0.4479 | 0.1234 | 0.2906 transmembrane and coiled-coil domains 2                             |
| 234076 | Tmc3    | 0.75  | -0.36 | -0.25 | 0.06  | 0.0729 | 0.1578 | 0.2142 | 0.0847 | 0.0171 transmembrane and coiled-coil domains 3                             |
| 234076 | Tmc3    | -0.09 | 0.19  | 0.06  | 0.07  | 0.4169 | 0.0983 | 0.2600 | 0.3376 | 0.2797 transmembrane and coiled-coil domains 3                             |

|        |           |       |       |       |       |        |        |        |        |                                                                  |
|--------|-----------|-------|-------|-------|-------|--------|--------|--------|--------|------------------------------------------------------------------|
| 77056  | Tmc04     | 0.46  | 0.02  | 0.15  | 0.16  | 0.1892 | 0.4596 | 0.4556 | 0.1423 | 0.0427 transmembrane and coiled-coil domains 4                   |
| 77056  | Tmc04     | -0.05 | 0.23  | 0.61  | 0.83  | 0.6615 | 0.1875 | 0.0475 | 0.0001 | 0.0000 transmembrane and coiled-coil domains 4                   |
| 77056  | Tmc04     | 0.02  | 0.44  | 0.51  | 0.52  | 0.6783 | 0.0703 | 0.0099 | 0.0021 | 0.0002 transmembrane and coiled-coil domains 4                   |
| 67366  | Tmc05     | -0.04 | -0.07 | -0.01 | -0.06 | 0.5746 | 0.3855 | 0.6387 | 0.5504 | 0.2455 transmembrane and coiled-coil domains 5                   |
| 71983  | Tmc06     | 0.14  | -0.10 | -0.88 | -0.44 | 0.5506 | 0.3287 | 0.0020 | 0.0419 | 0.0003 transmembrane and coiled-coil domains 5                   |
| 272538 | Tmc07     | -0.02 | 0.49  | 0.59  | 0.12  | 0.6963 | 0.5638 | 0.4682 | 0.3559 | 0.3564 transmembrane and coiled-coil domains 7                   |
| 66601  | Tmgd1     | -0.06 | -0.05 | -0.10 | -0.07 | 0.5379 | 0.5117 | 0.3626 | 0.3200 | 0.0102 transmembrane and immunoglobulin domain containing 1      |
| 387314 | Tmgd1     | 0.20  | -0.11 | -0.32 | -0.15 | 0.4265 | 0.3179 | 0.0820 | 0.1865 | 0.0462 transmembrane and tetraicopeptide repeat containing 1     |
| 278279 | Tmc2      | 0.19  | -0.37 | -0.35 | -0.22 | 0.4249 | 0.0261 | 0.0205 | 0.0794 | 0.0273 transmembrane and tetraicopeptide repeat containing 2     |
| 278279 | Tmc2      | -0.41 | 0.59  | 0.25  | 0.39  | 0.5387 | 0.1525 | 0.2628 | 0.1472 | 0.0161 transmembrane and tetraicopeptide repeat containing 2     |
| 278279 | Tmc2      | -0.12 | 0.20  | 0.07  | -0.12 | 0.5695 | 0.1977 | 0.3046 | 0.3461 | 0.0545 transmembrane and tetraicopeptide repeat containing 3     |
| 237500 | Tmc3      | 0.55  | -0.92 | 0.40  | 0.20  | 0.3085 | 0.0323 | 0.2273 | 0.3266 | 0.1849 transmembrane and tetraicopeptide repeat containing 3     |
| 237500 | Tmc3      | 0.04  | 0.02  | 0.03  | 0.01  | 0.5768 | 0.5682 | 0.5735 | 0.4434 | 0.4701 transmembrane and tetraicopeptide repeat containing 3     |
| 70551  | Tmc4      | 0.25  | -0.60 | -0.70 | -0.47 | 0.3732 | 0.0168 | 0.0058 | 0.0076 | 0.0001 transmembrane and tetraicopeptide repeat containing 3     |
| 64295  | Tmb01     | 0.00  | -0.10 | -0.14 | -0.08 | 0.7039 | 0.4101 | 0.2868 | 0.2807 | 0.2553 transmembrane and tetraicopeptide repeat containing 4     |
| 72053  | Tmb2      | -1.96 | -0.07 | -1.11 | -1.38 | 0.2247 | 0.4586 | 0.5580 | 0.1812 | 0.0815 transmembrane and ubiquitin-like domain containing 1      |
| 72053  | Tmb2      | -0.47 | 0.17  | 0.55  | 0.38  | 0.3864 | 0.2859 | 0.0779 | 0.0203 | 0.0013 transmembrane and ubiquitin-like domain containing 2      |
| 231225 | Tap1      | 0.00  | -0.08 | 0.06  | 0.04  | 0.21   | 0.3662 | 0.6012 | 0.5068 | 0.1131 transmembrane and ubiquitin-like domain containing 2      |
| 69660  | Tmbm1     | 0.59  | -0.32 | 0.15  | 0.22  | 0.2170 | 0.1743 | 0.6267 | 0.1780 | 0.0034 transmembrane anterior posterior transformation 1         |
| 69660  | Tmbm1     | 0.24  | 0.16  | 0.47  | 0.60  | 0.5242 | 0.5968 | 0.3865 | 0.1086 | 0.0160 transmembrane BAX inhibitor motif containing 1            |
| 68212  | Tmbm4     | -0.03 | 0.03  | 0.61  | 0.68  | 0.6764 | 0.6506 | 0.2184 | 0.0542 | 0.0239 transmembrane BAX inhibitor motif containing 1            |
| 68212  | Tmbm4     | -0.48 | 0.55  | 0.44  | -0.09 | 0.1874 | 0.0879 | 0.0867 | 0.4262 | 0.3472 transmembrane BAX inhibitor motif containing 4            |
| 217356 | Tmc8      | 0.17  | -0.16 | 0.13  | -0.10 | 0.5837 | 0.3172 | 0.5756 | 0.4507 | 0.1342 transmembrane BAX inhibitor motif containing 4            |
| 134099 | Tmc1      | 0.11  | 0.15  | 0.36  | 0.17  | 0.6323 | 0.5389 | 0.6181 | 0.1509 | 0.1181 transmembrane chanel-like 8                               |
| 134099 | Tmc1      | 0.10  | 0.05  | 0.15  | 0.03  | 0.5884 | 0.5181 | 0.6306 | 0.4754 | 0.4589 transmembrane chanel-like gene family 1                   |
| 192140 | Tmc2      | -0.01 | 0.07  | -0.04 | -0.03 | 0.6762 | 0.5092 | 0.4766 | 0.4260 | 0.3805 transmembrane chanel-like gene family 1                   |
| 192140 | Tmc2      | -0.05 | 0.01  | 0.05  | 0.00  | 0.5561 | 0.6441 | 0.5155 | 0.5617 | 0.2148 transmembrane chanel-like gene family 2                   |
| 233424 | Tmc3      | 0.06  | 0.10  | 0.00  | -0.04 | 0.6189 | 0.5429 | 0.5977 | 0.5582 | 0.3488 transmembrane chanel-like gene family 2                   |
| 233424 | Tmc3      | -0.09 | -0.08 | -0.09 | -0.02 | 0.4560 | 0.2528 | 0.2826 | 0.4033 | 0.4357 transmembrane chanel-like gene family 3                   |
| 233424 | Tmc3      | 0.01  | -0.01 | 0.07  | -0.02 | 0.6793 | 0.6437 | 0.3815 | 0.5091 | 0.2869 transmembrane chanel-like gene family 3                   |
| 335499 | Tmc4      | 0.00  | 0.06  | -0.04 | -0.03 | 0.6925 | 0.5616 | 0.3882 | 0.4698 | 0.4105 transmembrane chanel-like gene family 3                   |
| 335499 | Tmc4      | 0.61  | -0.44 | -0.19 | 0.34  | 0.1037 | 0.2181 | 0.3561 | 0.0087 | 0.0163 transmembrane chanel-like gene family 4                   |
| 335499 | Tmc4      | 0.50  | -0.16 | 0.05  | 0.29  | 0.1977 | 0.3941 | 0.5756 | 0.0589 | 0.0174 transmembrane chanel-like gene family 4                   |
| 74424  | Tmc5      | 0.44  | -0.25 | 0.05  | 0.32  | 0.2313 | 0.2995 | 0.5661 | 0.1035 | 0.0001 transmembrane chanel-like gene family 5                   |
| 217353 | Tmc6      | -1.09 | -0.51 | 0.34  | 0.05  | 0.3172 | 0.2050 | 0.0073 | 0.0023 | 0.0001 transmembrane chanel-like gene family 5                   |
| 217353 | Tmc6      | 0.08  | 0.51  | 0.56  | 0.11  | 0.2797 | 0.1919 | 0.2260 | 0.4517 | 0.4441 transmembrane chanel-like gene family 6                   |
| 209760 | Tmc7      | -0.47 | -0.11 | 0.25  | 0.57  | 0.6666 | 0.5925 | 0.5507 | 0.3752 | 0.3993 transmembrane chanel-like gene family 6                   |
| 209760 | Tmc7      | -0.06 | 0.11  | 0.16  | -0.02 | 0.2204 | 0.2770 | 0.5628 | 0.0024 | 0.0001 transmembrane chanel-like gene family 7                   |
| 17083  | Tmc8      | -0.06 | 0.11  | 0.16  | -0.02 | 0.2480 | 0.3588 | 0.3449 | 0.3992 | 0.1538 transmembrane chanel-like gene family 7                   |
| 66111  | Tmd1      | -0.28 | 0.10  | -0.57 | -0.78 | 0.5641 | 0.5380 | 0.3475 | 0.4823 | 0.4651 transmembrane chanel-like gene family 7                   |
| 382620 | Tmd8      | -1.08 | 0.12  | -0.63 | -0.83 | 0.4708 | 0.6309 | 0.0364 | 0.0164 | 0.0003 transmembrane emp24 domain containing 1                   |
| 56334  | Tmd2      | -0.92 | -0.02 | -0.28 | -0.63 | 0.3339 | 0.4069 | 0.5182 | 0.0050 | 0.0003 transmembrane emp24 domain containing 3                   |
| 56334  | Tmd2      | -0.58 | 0.25  | -0.18 | -0.08 | 0.6966 | 0.5311 | 0.0005 | 0.0073 | 0.0001 transmembrane emp24 domain containing 8                   |
| 56334  | Tmd2      | -0.20 | -0.32 | 0.24  | 0.70  | 0.0914 | 0.4416 | 0.0043 | 0.2460 | 0.0043 transmembrane emp24 domain containing 8                   |
| 103694 | Tmd4      | -0.18 | 0.25  | 0.09  | 0.31  | 0.6544 | 0.5244 | 0.4036 | 0.0015 | 0.0003 transmembrane emp24 domain trafficking protein 2          |
| 73130  | Tmd5      | -0.41 | -0.20 | 0.14  | 0.45  | 0.1657 | 0.4196 | 0.4788 | 0.0060 | 0.0003 transmembrane emp24 domain trafficking protein 2          |
| 66269  | Tmd6      | -0.04 | 0.25  | 0.20  | 0.01  | 0.5998 | 0.1177 | 0.1979 | 0.5275 | 0.0199 transmembrane emp24 protein transport domain containing 4 |
| 66676  | Tmd7      | 0.29  | 0.01  | 0.17  | 0.34  | 0.2229 | 0.4882 | 0.6043 | 0.0856 | 0.0154 transmembrane emp24 protein transport domain containing 5 |
| 66676  | Tmd7      | 0.33  | -0.32 | 0.15  | 0.48  | 0.2776 | 0.2580 | 0.2977 | 0.0294 | 0.4758 transmembrane emp24 protein transport domain containing 6 |
| 66676  | Tmd7      | 0.02  | 0.04  | -0.02 | -0.05 | 0.6572 | 0.6324 | 0.5024 | 0.4291 | 0.0017 transmembrane emp24 protein transport domain containing 7 |
| 67511  | Tmd9      | -0.33 | 0.01  | -0.05 | 0.03  | 0.4494 | 0.4356 | 0.4611 | 0.5107 | 0.1030 transmembrane emp24 protein transport domain containing 7 |
| 68581  | Tmd10     | 0.16  | -0.06 | 0.46  | 0.42  | 0.5176 | 0.6107 | 0.0642 | 0.0270 | 0.2277 transmembrane emp24 protein transport domain containing 9 |
| 68581  | Tmd10     | 0.06  | -0.44 | 0.09  | 0.02  | 0.6485 | 0.0764 | 0.6045 | 0.5474 | 0.0036 transmembrane emp24-like trafficking protein 10 (yeast)   |
| 240819 | Tedd1     | -0.05 | -0.52 | -0.03 | -0.12 | 0.5860 | 0.6017 | 0.5414 | 0.1538 | 0.0254 transmembrane emp24-like trafficking protein 10 (yeast)   |
| 20776  | Tmie      | -0.35 | -0.52 | -0.92 | -1.04 | 0.4652 | 0.5073 | 0.1704 | 0.0038 | 0.0593 transmembrane epididymal protein 1                        |
| 234129 | Tpie      | 0.09  | -0.05 | 0.02  | 0.00  | 0.4886 | 0.3445 | 0.5704 | 0.5524 | 0.0000 transmembrane inner ear                                   |
| 319875 | Trmprs11b | 0.00  | 0.06  | -0.12 | -0.03 | 0.6964 | 0.4214 | 0.3152 | 0.4827 | 0.4701 transmembrane phosphatase with tensin homology            |
| 231382 | Trmprs11d | 0.08  | 0.00  | 0.00  | 0.02  | 0.5462 | 0.5427 | 0.5005 | 0.2127 | 0.3786 transmembrane phosphatase with tensin homology            |
| 243084 | Trmprs11f | -0.06 | -0.69 | 0.01  | -0.10 | 0.5002 | 0.5164 | 0.3629 | 0.3167 | 0.4607 transmembrane protease, serine 11b                        |
| 243083 | Trmprs11f | 0.05  | -0.10 | -0.01 | -0.16 | 0.5987 | 0.3464 | 0.5744 | 0.2127 | 0.2868 transmembrane protease, serine 11d                        |
| 243083 | Trmprs11f | 0.05  | -0.04 | -0.05 | 0.01  | 0.5300 | 0.4488 | 0.4187 | 0.5456 | 0.3139 transmembrane protease, serine 11f                        |
| 75002  | Trmprs12  | 0.12  | -0.06 | -0.02 | -0.01 | 0.5646 | 0.4527 | 0.6045 | 0.4618 | 0.4799 transmembrane protease, serine 11f                        |
| 14531  | Trmprs13  | -0.33 | 0.15  | 0.31  | 0.15  | 0.3535 | 0.3751 | 0.4907 | 0.5479 | 0.1922 transmembrane protease, serine 12                         |
| 50528  | Trmprs2   | 0.09  | -0.54 | -0.41 | -0.43 | 0.2132 | 0.2527 | 0.0713 | 0.3647 | 0.2138 transmembrane protease, serine 12                         |
| 140765 | Trmprs3   | 0.05  | 0.11  | 0.00  | 0.13  | 0.6315 | 0.0526 | 0.1787 | 0.1035 | 0.1647 transmembrane protease, serine 2                          |
| 214523 | Trmprs4   | 0.24  | -0.04 | -0.11 | 0.03  | 0.4461 | 0.3646 | 0.2600 | 0.5011 | 0.0881 transmembrane protease, serine 2                          |
| 80893  | Trmprs5   | 0.03  | 0.07  | -0.31 | -0.36 | 0.6804 | 0.5581 | 0.0891 | 0.0228 | 0.4602 transmembrane protease, serine 3                          |
| 30843  | Trmprs8   | -0.07 | 0.04  | -0.18 | -0.21 | 0.6019 | 0.5190 | 0.3747 | 0.2135 | 0.0358 transmembrane protease, serine 4                          |
| 216131 | Tmem1     | 0.10  | 0.02  | 0.00  | 0.04  | 0.5623 | 0.4623 | 0.4271 | 0.4181 | 0.4702 transmembrane protease, serine 5 (spinesin)               |
| 226115 | Tmem10    | 0.07  | 0.25  | 0.20  | 0.40  | 0.5133 | 0.6107 | 0.1095 | 0.1113 | 0.0024 transmembrane protease, serine 8 (intestinal)             |
| 226115 | Tmem10    | -0.06 | -0.05 | -0.08 | -0.08 | 0.4994 | 0.5734 | 0.5433 | 0.2789 | 0.1865 transmembrane protease 10                                 |
| 67888  | Tmem100   | -0.09 | 0.01  | 0.02  | -0.14 | 0.5375 | 0.4756 | 0.5017 | 0.0440 | 0.0878 transmembrane protease 10                                 |
| 76547  | Tmem101   | 0.37  | 0.27  | 0.11  | 0.40  | 0.2245 | 0.2974 | 0.5430 | 0.0645 | 0.0049 transmembrane protease 100                                |
| 72341  | Tmem103   | -0.78 | 0.14  | -0.15 | -0.55 | 0.1245 | 0.3618 | 0.5964 | 0.0670 | 0.0003 transmembrane protease 100                                |
| 72341  | Tmem103   | -0.56 | 0.19  | -0.37 | -0.54 | 0.1970 | 0.2607 | 0.4414 | 0.0116 | 0.0004 transmembrane protease 101                                |
| 217203 | Tmem106a  | -0.39 | -0.05 | -0.36 | -0.68 | 0.2626 | 0.5291 | 0.2233 | 0.0023 | 0.0000 transmembrane protease 103                                |
| 217203 | Tmem106a  | 0.13  | -0.25 | -0.43 | -0.39 | 0.4410 | 0.1028 | 0.0193 | 0.3766 | 0.1384 transmembrane protease 103                                |
| 71900  | Tmem106b  | 0.42  | -0.29 | -0.02 | 0.15  | 0.5767 | 0.1672 | 0.0302 | 0.0795 | 0.0094 transmembrane protease 106A                               |
| 71900  | Tmem106b  | 0.23  | 0.00  | -0.03 | 0.03  | 0.4428 | 0.4388 | 0.0532 | 0.5175 | 0.0204 transmembrane protease 106B                               |
| 380967 | Tmem106c  | 0.11  | -0.80 | -0.49 | -0.26 | 0.5523 | 0.0021 | 0.0097 | 0.1103 | 0.4311 transmembrane protease 106B                               |
| 380967 | Tmem106c  | 0.34  | -0.07 | 0.00  | 0.08  | 0.1597 | 0.3069 | 0.4229 | 0.3847 | 0.2663 transmembrane protease 106C                               |
| 68910  | Tmem107   | 0.19  | -0.01 | 0.09  | 0.24  | 0.2569 | 0.6230 | 0.5001 | 0.1202 | 0.0319 transmembrane protease 107                                |
| 81907  | Tmem108   | -0.03 | -0.44 | -1.05 | -1.30 | 0.6714 | 0.1051 | 0.0030 | 0.0002 | 0.0000 transmembrane protease 108                                |
| 68539  | Tmem109   | 0.26  | 0.45  | -0.18 | -0.41 | 0.3740 | 0.5649 | 0.3467 | 0.2773 | 0.0227 transmembrane protease 109                                |
| 216921 | Tmem11    | -0.15 | 0.09  | -0.08 | 0.02  | 0.4217 | 0.5345 | 0.0963 | 0.3993 | 0.4619 transmembrane protease 110                                |
|        |           | 0.33  | 0.47  | 0.50  | 0.50  | 0.3361 | 0.3645 | 0.2860 | 0.0066 | 0.0236 transmembrane protease 111                                |

|        |          |       |       |       |        |       |         |        |        |        |                                                                    |
|--------|----------|-------|-------|-------|--------|-------|---------|--------|--------|--------|--------------------------------------------------------------------|
| 216821 | Tmem11   | -0.26 | 0.45  | 0.86  | 0.89   | 0.98  | 0.5832  | 0.1798 | 0.0531 | 0.0000 | 0.0001 transmembrane protein 11                                    |
| 69179  | Tmem110  | -0.68 | 0.27  | 0.21  | 0.19   | 0.28  | 0.3062  | 0.2378 | 0.2497 | 0.0281 | 0.0472 transmembrane protein 110                                   |
| 69179  | Tmem110  | -0.24 | 0.44  | 0.04  | -0.33  | -0.58 | 0.4811  | 0.2924 | 0.1511 | 0.0294 | 0.0199 transmembrane protein 110                                   |
| 69179  | Tmem110  | -0.01 | -0.14 | -0.43 | -0.43  | -0.74 | 0.8919  | 0.5191 | 0.6122 | 0.1511 | 0.0005 transmembrane protein 110                                   |
| 68087  | Tmem111  | 0.38  | -0.37 | -0.22 | 0.28   | 0.48  | 0.1525  | 0.1605 | 0.1574 | 0.0118 | 0.0151 transmembrane protein 111                                   |
| 68087  | Tmem111  | 0.20  | -0.44 | -0.03 | 0.14   | 0.31  | 0.2274  | 0.0573 | 0.5316 | 0.4057 | 0.0991 transmembrane protein 111                                   |
| 56395  | Tmem115  | -0.26 | -0.06 | 0.22  | 0.46   | 0.61  | 0.4640  | 0.0573 | 0.2314 | 0.0470 | 0.0070 transmembrane protein 115                                   |
| 77462  | Tmem116  | 0.35  | -0.30 | -0.20 | 0.20   | 0.23  | 0.5533  | 0.0528 | 0.1660 | 0.2439 | 0.0857 transmembrane protein 116                                   |
| 77462  | Tmem116  | 0.21  | -0.18 | 0.05  | 0.06   | 0.27  | 0.2175  | 0.0528 | 0.2222 | 0.5461 | 0.2437 transmembrane protein 116                                   |
| 320709 | Tmem117  | 1.24  | 0.11  | 0.23  | 0.16   | -0.10 | 0.0197  | 0.6066 | 0.5986 | 0.1431 | 0.1899 transmembrane protein 117                                   |
| 320709 | Tmem117  | -0.16 | 0.00  | -0.07 | -0.08  | -0.14 | 0.3300  | 0.6428 | 0.4035 | 0.3767 | 0.1045 transmembrane protein 117                                   |
| 231633 | Tmem119  | 0.02  | 0.14  | 0.19  | -0.24  | -0.49 | 0.6895  | 0.6540 | 0.5959 | 0.2966 | 0.0919 transmembrane protein 119                                   |
| 231633 | Tmem119  | 0.02  | 0.79  | 0.71  | 0.42   | 0.49  | 0.6853  | 0.0336 | 0.0689 | 0.1048 | 0.0393 transmembrane protein 120A                                  |
| 315010 | Tmem120a | 0.33  | -0.31 | 0.06  | 0.27   | 0.13  | 0.3682  | 0.2448 | 0.6186 | 0.1197 | 0.2430 transmembrane protein 120B                                  |
| 69195  | Tmem121  | 0.01  | 0.14  | 0.01  | -0.03  | -0.32 | 0.6910  | 0.6531 | 0.4984 | 0.5008 | 0.0117 transmembrane protein 121                                   |
| 71929  | Tmem123  | 0.93  | -0.67 | -0.42 | 0.65   | 0.71  | 0.0310  | 0.1015 | 0.1177 | 0.0083 | 0.0028 transmembrane protein 123                                   |
| 71929  | Tmem123  | 0.35  | 0.22  | 0.19  | 0.01   | 0.44  | 0.2818  | 0.0043 | 0.0048 | 0.5485 | 0.0170 transmembrane protein 123                                   |
| 230678 | Tmem125  | -0.10 | 0.98  | 0.70  | 0.13   | 0.45  | 0.5642  | 0.0043 | 0.0048 | 0.3900 | 0.0103 transmembrane protein 125                                   |
| 66271  | Tmem126a | 0.54  | -0.55 | -0.58 | 0.00   | 0.31  | 0.1874  | 0.2135 | 0.0305 | 0.5648 | 0.1351 transmembrane protein 126A                                  |
| 68472  | Tmem126b | 0.63  | -1.17 | -1.32 | -0.47  | -0.74 | 0.0844  | 0.0011 | 0.0002 | 0.0204 | 0.0003 transmembrane protein 126B                                  |
| 69470  | Tmem127  | 0.07  | -0.05 | 0.09  | 0.11   | 0.32  | 0.5659  | 0.5488 | 0.5504 | 0.2857 | 0.0125 transmembrane protein 127                                   |
| 69470  | Tmem127  | 0.10  | -0.10 | -0.23 | 0.3389 | 0.44  | 0.6031  | 0.3369 | 0.2061 | 0.4752 | 0.0648 transmembrane protein 127                                   |
| 66309  | Tmem128  | 0.49  | -0.98 | -1.01 | -0.47  | -0.43 | 0.1674  | 0.0050 | 0.0040 | 0.0048 | 0.0033 transmembrane protein 128                                   |
| 66309  | Tmem128  | 0.75  | -0.27 | 0.14  | 0.47   | 1.16  | 0.1763  | 0.2343 | 0.6095 | 0.1116 | 0.0005 transmembrane protein 128                                   |
| 68366  | Tmem129  | 0.22  | -1.00 | -0.02 | -1.10  | -0.78 | 0.5282  | 0.0049 | 0.0065 | 0.3793 | 0.0155 transmembrane protein 129                                   |
| 68366  | Tmem129  | 0.15  | -0.17 | -0.02 | -0.09  | -0.64 | 0.5479  | 0.2281 | 0.3896 | 0.3793 | 0.4829 transmembrane protein 129                                   |
| 243339 | Tmem130  | 0.02  | 0.16  | -0.02 | 0.17   | 0.18  | 0.6764  | 0.1701 | 0.6398 | 0.1378 | 0.0875 transmembrane protein 130                                   |
| 56030  | Tmem131  | 0.50  | -0.41 | -0.17 | 0.34   | 0.60  | 0.2412  | 0.1708 | 0.3919 | 0.2007 | 0.0199 transmembrane protein 131                                   |
| 56030  | Tmem131  | 0.00  | 0.18  | -0.03 | 0.08   | 0.05  | 0.6961  | 0.2021 | 0.4916 | 0.2658 | 0.3174 transmembrane protein 131                                   |
| 98170  | Tmem132a | 0.30  | 0.55  | 0.29  | -0.07  | -0.21 | 0.3714  | 0.0129 | 0.1546 | 0.4942 | 0.2415 transmembrane protein 132A                                  |
| 208151 | Tmem132b | -0.09 | 0.06  | 0.10  | -0.08  | -0.08 | 0.5087  | 0.4831 | 0.4800 | 0.2803 | 0.2560 transmembrane protein 132B                                  |
| 208151 | Tmem132b | -0.04 | 0.06  | 0.07  | -0.01  | -0.06 | 0.5725  | 0.4973 | 0.3958 | 0.5161 | 0.2698 transmembrane protein 132B                                  |
| 208213 | Tmem132c | 0.15  | -0.01 | 0.20  | 0.14   | 0.25  | 0.4326  | 0.5500 | 0.1985 | 0.2602 | 0.0455 transmembrane protein 132C                                  |
| 243274 | Tmem132d | -0.92 | 0.33  | -0.20 | -0.10  | -0.09 | 0.1284  | 0.5833 | 0.3051 | 0.4439 | 0.4737 transmembrane protein 132D                                  |
| 270893 | Tmem132e | 0.04  | -0.01 | 0.08  | 0.03   | 0.04  | 0.5929  | 0.6226 | 0.3904 | 0.2850 | 0.3454 transmembrane protein 132E                                  |
| 66990  | Tmem134  | -0.17 | 0.45  | 0.22  | 0.03   | 0.22  | 0.4244  | 0.1008 | 0.4707 | 0.4800 | 0.0870 transmembrane protein 134                                   |
| 66990  | Tmem134  | 0.08  | -0.21 | -0.27 | -0.17  | -0.39 | 0.5769  | 0.2115 | 0.1496 | 0.2722 | 0.0135 transmembrane protein 134                                   |
| 72759  | Tmem135  | 0.30  | -0.15 | -0.05 | 0.08   | -0.11 | 0.1596  | 0.2263 | 0.4504 | 0.4063 | 0.1976 transmembrane protein 135                                   |
| 72759  | Tmem135  | -0.07 | -0.02 | 0.03  | -0.02  | -0.04 | 0.4987  | 0.6465 | 0.5384 | 0.4969 | 0.3420 transmembrane protein 135                                   |
| 72982  | Tmem138  | 0.06  | 0.13  | 0.22  | 0.10   | 0.24  | 0.5886  | 0.4939 | 0.2217 | 0.2306 | 0.0139 transmembrane protein 138                                   |
| 72982  | Tmem138  | -0.04 | -0.26 | -0.30 | -0.25  | -0.29 | 0.6386  | 0.3003 | 0.1851 | 0.0118 | 0.0072 transmembrane protein 138                                   |
| 109218 | Tmem139  | 0.00  | 0.03  | -0.02 | 0.03   | -0.04 | 0.6983  | 0.6437 | 0.4717 | 0.5610 | 0.4068 transmembrane protein 139                                   |
| 68487  | Tmem140  | 0.08  | -0.03 | 0.07  | 0.05   | 0.05  | 0.5795  | 0.6113 | 0.3586 | 0.3837 | 0.3633 transmembrane protein 140                                   |
| 68487  | Tmem140  | -0.19 | -0.82 | -0.64 | 0.07   | 0.26  | 0.6506  | 0.6026 | 0.6416 | 0.5062 | 0.2782 transmembrane protein 140                                   |
| 51875  | Tmem141  | -0.05 | 0.49  | -0.21 | -0.35  | -0.77 | 0.6765  | 0.4570 | 0.3148 | 0.2290 | 0.0190 transmembrane protein 141                                   |
| 70209  | Tmem143  | 0.21  | -0.15 | -0.15 | 0.08   | 0.04  | 0.2430  | 0.1632 | 0.2205 | 0.3559 | 0.4902 transmembrane protein 143                                   |
| 70652  | Tmem144  | 0.28  | -0.08 | -0.07 | 0.13   | 0.18  | 0.2516  | 0.4006 | 0.3787 | 0.1312 | 0.0850 transmembrane protein 144                                   |
| 70652  | Tmem144  | 0.06  | 0.09  | 0.04  | 0.18   | 0.38  | 0.5926  | 0.3574 | 0.4544 | 0.0701 | 0.0062 transmembrane protein 144                                   |
| 70652  | Tmem144  | 0.08  | 0.07  | -0.24 | -0.19  | -0.12 | 0.6339  | 0.5940 | 0.2271 | 0.3309 | 0.3474 transmembrane protein 144                                   |
| 330485 | Tmem145  | 0.09  | -0.04 | -0.08 | -0.05  | 0.31  | 0.4489  | 0.3480 | 0.2058 | 0.3604 | 0.1242 transmembrane protein 145                                   |
| 106757 | Tmem146  | -0.04 | 0.04  | -0.08 | -0.05  | 0.01  | 0.6137  | 0.5363 | 0.4798 | 0.3608 | 0.4718 transmembrane protein 146                                   |
| 69804  | Tmem147  | 0.25  | -0.55 | -0.50 | -0.16  | -0.20 | 0.0052  | 0.6231 | 0.0199 | 0.3628 | 0.2191 transmembrane protein 147                                   |
| 101883 | Tmem149  | -0.84 | -0.03 | -0.38 | -0.44  | -0.99 | 0.05916 | 0.5311 | 0.0213 | 0.0016 | 0.0001 transmembrane protein 149                                   |
| 75712  | Tmem14a  | 0.01  | 0.22  | -0.10 | -0.07  | -0.17 | 0.6942  | 0.2824 | 0.4271 | 0.3932 | 0.0001 transmembrane protein 14A                                   |
| 75712  | Tmem14a  | 0.34  | -0.63 | -0.43 | 0.01   | -0.07 | 0.3940  | 0.0330 | 0.0832 | 0.5464 | 0.1208 transmembrane protein 14A                                   |
| 66154  | Tmem14c  | 0.01  | 0.17  | 0.08  | 0.03   | 0.03  | 0.6476  | 0.4425 | 0.5969 | 0.4083 | 0.4124 transmembrane protein 14C                                   |
| 232086 | Tmem150  | 0.05  | 0.00  | 0.17  | 0.08   | 0.03  | 0.6476  | 0.4425 | 0.5969 | 0.4083 | 0.4124 transmembrane protein 14C                                   |
| 330199 | Tmem151a | 0.06  | 0.53  | 0.53  | 0.27   | 0.45  | 0.6594  | 0.2710 | 0.2491 | 0.2491 | 0.0538 transmembrane protein 151A                                  |
| 320782 | Tmem154  | 0.05  | -0.36 | -0.31 | -0.05  | -0.06 | 0.6595  | 0.2579 | 0.3395 | 0.4952 | 0.3993 transmembrane protein 154                                   |
| 67698  | Tmem157  | 0.14  | -0.28 | -0.62 | -0.24  | -0.31 | 0.5698  | 0.5113 | 0.1545 | 0.0813 | 0.0428 transmembrane protein 157                                   |
| 67698  | Tmem157  | -0.04 | -0.09 | -0.09 | -0.08  | -0.09 | 0.6304  | 0.6019 | 0.5760 | 0.2969 | 0.1706 transmembrane protein 157                                   |
| 72309  | Tmem158  | 0.01  | 0.55  | -0.02 | 0.34   | -0.26 | 0.6944  | 0.1675 | 0.5588 | 0.1072 | 0.1290 transmembrane protein 158                                   |
| 233906 | Tmem159  | -0.22 | -0.32 | -0.29 | -0.19  | 0.18  | 0.4677  | 0.1385 | 0.1349 | 0.1722 | 0.1205 transmembrane protein 159                                   |
| 69094  | Tmem160  | 0.00  | 0.32  | -0.19 | -0.38  | -0.27 | 0.7023  | 0.5421 | 0.2482 | 0.1974 | 0.2244 transmembrane protein 160                                   |
| 234371 | Tmem161a | -0.17 | 0.67  | 0.21  | -0.09  | -0.43 | 0.5409  | 0.0376 | 0.3618 | 0.4730 | 0.0638 transmembrane protein 161A                                  |
| 234371 | Tmem161a | 0.04  | -0.13 | -0.26 | -0.36  | -0.38 | 0.6588  | 0.3250 | 0.1264 | 0.0137 | 0.0040 transmembrane protein 161A                                  |
| 724371 | Tmem161b | -1.14 | 0.33  | -0.45 | -1.20  | -1.46 | 0.2019  | 0.3738 | 0.4845 | 0.0227 | 0.0028 transmembrane protein 161B                                  |
| 724371 | Tmem161b | 0.04  | 0.29  | -0.04 | -0.04  | -0.05 | 0.6677  | 0.5162 | 0.4436 | 0.5140 | 0.4204 transmembrane protein 161B                                  |
| 7245   | Tmem161b | 0.04  | 0.29  | -0.04 | -0.04  | -0.05 | 0.6677  | 0.5162 | 0.4436 | 0.5140 | 0.4204 transmembrane protein 161B                                  |
| 7245   | Tmem161b | 0.15  | -0.05 | -0.26 | -0.16  | -0.33 | 0.5543  | 0.3778 | 0.1362 | 0.2317 | 0.0121 transmembrane protein 162                                   |
| 72160  | Tmem162  | 0.59  | -0.93 | -0.45 | 0.18   | 0.40  | 0.2383  | 0.0261 | 0.1538 | 0.3727 | 0.0871 transmembrane protein 162                                   |
| 72160  | Tmem162  | 0.04  | 0.09  | 0.04  | 0.04   | 0.04  | 0.6756  | 0.6272 | 0.5449 | 0.4091 | 0.3575 transmembrane protein 163                                   |
| 72160  | Tmem163  | 0.59  | -0.93 | -0.45 | 0.18   | 0.40  | 0.2383  | 0.0261 | 0.1538 | 0.3727 | 0.0871 transmembrane protein 163                                   |
| 209497 | Tmem164  | 0.01  | 0.04  | 0.09  | 0.04   | 0.04  | 0.6756  | 0.6272 | 0.5449 | 0.4091 | 0.3575 transmembrane protein 164                                   |
| 209497 | Tmem164  | -0.12 | 0.08  | 0.08  | 0.08   | -0.33 | 0.4865  | 0.6336 | 0.6254 | 0.1085 | 0.0064 transmembrane protein 165                                   |
| 21982  | Tmem165  | -1.17 | -0.36 | 0.38  | -0.94  | -1.61 | 0.6205  | 0.0688 | 0.0530 | 0.0493 | 0.0068 transmembrane protein 165                                   |
| 21982  | Tmem165  | 0.04  | -0.27 | -0.27 | -0.18  | -0.32 | 0.4288  | 0.0401 | 0.0156 | 0.0270 | 0.0188 transmembrane protein 166                                   |
| 232146 | Tmem166  | -0.70 | 1.31  | 1.65  | 0.70   | 0.67  | 0.4288  | 0.0401 | 0.0156 | 0.0270 | 0.0188 transmembrane protein 166                                   |
| 66074  | Tmem167  | 0.36  | -0.90 | -0.62 | -0.46  | -0.49 | 0.1138  | 0.0007 | 0.0018 | 0.0027 | 0.0008 transmembrane protein 167                                   |
| 66074  | Tmem167  | 0.11  | -0.45 | -0.30 | -0.35  | -0.10 | 0.5325  | 0.0987 | 0.1417 | 0.0086 | 0.2163 transmembrane protein 167                                   |
| 101118 | Tmem168  | 0.39  | -0.01 | -0.03 | 0.37   | 0.61  | 0.1977  | 0.5987 | 0.5690 | 0.0100 | 0.0002 transmembrane protein 168                                   |
| 101118 | Tmem168  | -0.05 | 0.06  | -0.03 | -0.05  | 0.18  | 0.5645  | 0.6289 | 0.4383 | 0.4726 | 0.0002 transmembrane protein 168                                   |
| 271711 | Tmem16a  | 0.20  | 0.06  | -0.04 | 0.03   | 0.15  | 0.2308  | 0.1162 | 0.3925 | 0.2617 | 0.4466 transmembrane protein 169                                   |
| 101772 | Tmem16a  | 0.66  | -0.59 | -0.17 | 0.30   | 0.50  | 0.2308  | 0.1162 | 0.3925 | 0.2617 | 0.4466 transmembrane protein 169                                   |
| 243634 | Tmem16b  | 0.16  | -0.02 | -0.01 | 0.10   | 0.10  | 0.2035  | 0.6536 | 0.6267 | 0.1542 | 0.0418 transmembrane protein 16A                                   |
| 243634 | Tmem16b  | 0.01  | 0.08  | 0.07  | 0.03   | 0.02  | 0.6903  | 0.4288 | 0.4189 | 0.4377 | 0.1740 transmembrane protein 16B                                   |
| 228432 | Tmem16c  | 0.01  | -0.05 | -0.08 | 0.04   | 0.03  | 0.6903  | 0.4288 | 0.4189 | 0.4377 | 0.1740 transmembrane protein 16B                                   |
| 320091 | Tmem16d  | 0.10  | -0.11 | -0.08 | 0.03   | -0.03 | 0.4557  | 0.3678 | 0.4517 | 0.3852 | 0.3575 transmembrane protein 16C                                   |
| 320091 | Tmem16d  | 0.06  | -0.02 | -0.03 | -0.06  | -0.04 | 0.4921  | 0.5073 | 0.6003 | 0.6244 | 0.3889 transmembrane protein 16D (eight membrane-spanning domains) |
| 320091 | Tmem16d  | -0.03 | -0.01 | -0.42 | -0.03  | -0.12 | 0.6003  | 0.6244 | 0.4497 | 0.4430 | 0.2954 transmembrane protein 16D (eight membrane-spanning domains) |
| 323246 | Tmem16e  | -0.02 | 0.05  | 0.04  | 0.02   | -0.02 | 0.6368  | 0.4497 | 0.4430 | 0.4809 | 0.0619 transmembrane protein 16E                                   |
| 105722 | Tmem16f  | 0.25  | 0.01  | 0.66  | 0.82   | 1.48  | 0.5002  | 0.5409 | 0.1854 | 0.0098 | 0.0001 transmembrane protein 16F                                   |
| 105722 | Tmem16f  | -0.06 | 0.00  | 0.13  | 0.12   | 0.15  | 0.5354  | 0.6064 | 0.2051 | 0.2583 | 0.1365 transmembrane protein 16F</                                 |

|        |          |       |       |       |       |       |        |        |        |        |        |
|--------|----------|-------|-------|-------|-------|-------|--------|--------|--------|--------|--------|
| 382014 | Tnem16h  | 0.20  | -0.21 | -0.27 | -0.23 | -0.62 | 0.4875 | 0.2739 | 0.1451 | 0.1491 | 0.0000 |
| 71345  | Tnem16j  | -0.13 | 0.19  | -0.09 | -0.11 | -0.27 | 0.5451 | 0.5903 | 0.5869 | 0.3634 | 0.0406 |
| 102566 | Tnem16k  | 0.38  | -0.43 | -0.08 | 0.25  | 0.24  | 0.3261 | 0.1170 | 0.4130 | 0.2591 | 0.0485 |
| 102566 | Tnem16k  | -0.33 | -0.19 | -0.06 | 0.12  | -0.05 | 0.5641 | 0.5106 | 0.4232 | 0.3249 | 0.1089 |
| 103765 | Tnem17   | 0.28  | 0.18  | -0.20 | -0.16 | -0.05 | 0.4596 | 0.6466 | 0.2587 | 0.2689 | 0.3838 |
| 66817  | Tnem170  | 0.18  | -0.20 | -0.11 | -0.16 | -0.05 | 0.4017 | 0.1059 | 0.2480 | 0.0929 | 0.4940 |
| 380863 | Tnem171  | 0.32  | 0.48  | 0.81  | 0.60  | 0.95  | 0.4009 | 0.2915 | 0.0590 | 0.0084 | 0.0002 |
| 72512  | Tnem173  | 0.19  | -0.36 | -0.13 | -0.17 | -0.03 | 0.5667 | 0.1372 | 0.3046 | 0.3755 | 0.4618 |
| 68344  | Tnem174  | -0.06 | 0.11  | 0.18  | -0.25 | -0.54 | 0.6719 | 0.5311 | 0.0540 | 0.2135 | 0.0076 |
| 72392  | Tnem175  | 0.34  | -0.71 | -0.41 | 0.01  | 0.08  | 0.3562 | 0.0177 | 0.0846 | 0.5561 | 0.4169 |
| 72392  | Tnem175  | -0.01 | 0.04  | -0.05 | -0.04 | -0.02 | 0.6708 | 0.4350 | 0.6017 | 0.4021 | 0.4101 |
| 66058  | Tnem176a | 0.14  | -0.31 | -0.17 | -0.31 | -0.61 | 0.5435 | 0.1930 | 0.2734 | 0.1812 | 0.0122 |
| 66058  | Tnem176a | -0.14 | 0.18  | 0.11  | -0.48 | -0.57 | 0.6040 | 0.6407 | 0.5772 | 0.0878 | 0.0264 |
| 59563  | Tnem176b | 0.22  | 0.21  | 0.06  | -0.04 | 0.05  | 0.5094 | 0.6259 | 0.5243 | 0.5207 | 0.4401 |
| 66343  | Tnem177  | 0.14  | -0.71 | -0.83 | -0.62 | -0.85 | 0.4914 | 0.0035 | 0.0012 | 0.0010 | 0.0000 |
| 66343  | Tnem177  | -0.07 | -0.78 | -0.37 | -0.22 | -0.32 | 0.5827 | 0.2558 | 0.0690 | 0.0376 | 0.0121 |
| 68027  | Tnem178  | 0.08  | 0.52  | 0.37  | -0.11 | -0.18 | 0.6246 | 0.2829 | 0.4067 | 0.3378 | 0.1759 |
| 104885 | Tnem179  | 0.24  | 0.03  | 0.02  | 0.16  | 0.07  | 0.4052 | 0.4882 | 0.4584 | 0.1349 | 0.2829 |
| 67706  | Tnem179b | -0.29 | -0.40 | -0.29 | -0.36 | -0.54 | 0.3527 | 0.1137 | 0.1835 | 0.1023 | 0.0106 |
| 67706  | Tnem179b | -0.08 | -0.34 | -0.18 | -0.06 | -0.05 | 0.6295 | 0.0890 | 0.2497 | 0.5006 | 0.4312 |
| 211986 | Tnem18   | 0.34  | -1.02 | -1.00 | -0.40 | -0.28 | 0.3623 | 0.0100 | 0.0016 | 0.1387 | 0.1691 |
| 75146  | Tnem180  | 0.12  | -0.86 | -0.92 | -0.82 | -0.50 | 0.5921 | 0.0043 | 0.0083 | 0.0045 | 0.0200 |
| 75146  | Tnem180  | -0.05 | 0.12  | -0.01 | -0.16 | -0.41 | 0.5444 | 0.2692 | 0.5444 | 0.2692 | 0.0070 |
| 77106  | Tnem181  | 0.05  | -0.22 | -0.25 | -0.19 | -0.26 | 0.6531 | 0.2065 | 0.1912 | 0.2018 | 0.0348 |
| 381339 | Tnem182  | 0.35  | 0.08  | 0.49  | 0.94  | 0.69  | 0.3223 | 0.5724 | 0.1176 | 0.1176 | 0.0322 |
| 57439  | Tnem183a | 0.20  | 0.26  | 0.36  | 0.16  | 0.25  | 0.3829 | 0.3451 | 0.0868 | 0.1918 | 0.0530 |
| 57439  | Tnem183a | 0.19  | 0.16  | 0.51  | 0.34  | 0.38  | 0.4931 | 0.6430 | 0.2258 | 0.0114 | 0.0030 |
| 231832 | Tnem184a | 0.01  | -0.09 | -0.18 | -0.18 | -0.23 | 0.6915 | 0.4786 | 0.2594 | 0.2027 | 0.0698 |
| 223693 | Tnem184b | 0.29  | -0.18 | -0.32 | -0.31 | -0.65 | 0.3911 | 0.2005 | 0.1045 | 0.2016 | 0.0156 |
| 226351 | Tnem185b | 0.64  | -0.51 | -0.44 | 0.10  | 0.09  | 0.0804 | 0.0248 | 0.0312 | 0.3820 | 0.2795 |
| 66690  | Tnem186  | 0.15  | -0.03 | -0.03 | 0.18  | 0.24  | 0.4178 | 0.4609 | 0.4498 | 0.1024 | 0.0222 |
| 66690  | Tnem186  | 0.12  | -0.16 | -0.14 | 0.00  | 0.01  | 0.4225 | 0.3235 | 0.2866 | 0.5594 | 0.4669 |
| 66690  | Tnem186  | 0.09  | -0.49 | -0.39 | -0.34 | -0.38 | 0.4740 | 0.0027 | 0.0079 | 0.0017 | 0.0009 |
| 66690  | Tnem186  | 0.17  | -1.01 | -0.55 | -0.09 | 0.31  | 0.5287 | 0.6405 | 0.3873 | 0.0724 | 0.2475 |
| 382030 | Tnem188  | 0.70  | -0.77 | -0.60 | -0.44 | -0.36 | 0.1148 | 0.0073 | 0.0871 | 0.4600 | 0.0957 |
| 407243 | Tnem189  | -0.07 | 0.64  | 0.78  | 0.20  | 0.44  | 0.4869 | 0.0090 | 0.0114 | 0.0075 | 0.0272 |
| 67226  | Tnem19   | -0.09 | -0.15 | -0.52 | -0.48 | -0.78 | 0.5507 | 0.2484 | 0.0537 | 0.3914 | 0.0941 |
| 78052  | Tnem190  | 0.06  | 0.00  | 0.03  | -0.02 | 0.09  | 0.5362 | 0.5441 | 0.0160 | 0.0012 | 0.0003 |
| 224019 | Tnem191c | -0.36 | 0.44  | -0.18 | -0.56 | -0.91 | 0.3333 | 0.2437 | 0.6138 | 0.5088 | 0.1661 |
| 224019 | Tnem191c | 0.02  | 0.27  | 0.15  | 0.21  | 0.21  | 0.6713 | 0.2813 | 0.4776 | 0.0134 | 0.0110 |
| 73067  | Tnem192  | -0.68 | 0.29  | 0.35  | 0.02  | -0.07 | 0.2035 | 0.2103 | 0.1199 | 0.5300 | 0.3819 |
| 73067  | Tnem192  | 0.01  | 0.11  | 0.14  | -0.03 | 0.10  | 0.6951 | 0.5488 | 0.5538 | 0.5365 | 0.3532 |
| 210035 | Tnem194  | -0.04 | -0.52 | -0.82 | -0.61 | -0.69 | 0.6393 | 0.0094 | 0.0009 | 0.0007 | 0.0000 |
| 210035 | Tnem194  | -0.04 | -0.27 | -0.18 | -0.11 | -0.14 | 0.6490 | 0.3219 | 0.4825 | 0.2320 | 0.0969 |
| 319660 | Tnem195  | 0.74  | -0.62 | -0.30 | -0.07 | -0.05 | 0.0319 | 0.0232 | 0.1239 | 0.4468 | 0.3838 |
| 319660 | Tnem195  | 0.06  | -0.02 | -0.01 | 0.07  | 0.03  | 0.4733 | 0.5968 | 0.6239 | 0.2876 | 0.3747 |
| 319998 | Tnem198  | 0.08  | -0.12 | -0.18 | -0.13 | -0.06 | 0.6337 | 0.5474 | 0.2378 | 0.1098 | 0.2998 |
| 319998 | Tnem198  | 0.01  | 0.23  | 0.43  | 0.17  | 0.03  | 0.6937 | 0.5477 | 0.3426 | 0.0731 | 0.3992 |
| 195040 | Tnem199  | -0.11 | -0.30 | -0.42 | -0.02 | -0.02 | 0.6179 | 0.6205 | 0.4916 | 0.5319 | 0.4590 |
| 83921  | Tnem2    | -0.10 | -0.26 | -0.11 | 0.08  | -0.02 | 0.6003 | 0.3312 | 0.4420 | 0.4363 | 0.4662 |
| 240660 | Tnem20   | -0.57 | 0.16  | 0.06  | 0.34  | 0.43  | 0.2770 | 0.2803 | 0.3583 | 0.0280 | 0.0167 |
| 240660 | Tnem20   | -0.10 | 0.14  | -0.05 | -0.01 | -0.07 | 0.4864 | 0.4512 | 0.3945 | 0.5319 | 0.2631 |
| 240660 | Tnem20   | -0.01 | -0.01 | -0.06 | -0.01 | 0.02  | 0.6806 | 0.6022 | 0.4214 | 0.5383 | 0.4168 |
| 230917 | Tnem201  | 0.20  | 0.02  | 0.25  | 0.36  | 0.39  | 0.4035 | 0.4978 | 0.4209 | 0.0292 | 0.0017 |
| 230917 | Tnem201  | -0.06 | -0.06 | -0.06 | 0.10  | 0.02  | 0.5975 | 0.6376 | 0.6366 | 0.3276 | 0.4359 |
| 73893  | Tnem202  | -0.78 | -0.95 | -0.44 | -0.12 | -0.09 | 0.5299 | 0.5116 | 0.3552 | 0.2108 | 0.2358 |
| 407931 | Tnem204  | 0.10  | -0.08 | -0.08 | 0.80  | 1.25  | 0.2045 | 0.0736 | 0.2664 | 0.0523 | 0.0023 |
| 235043 | Tnem205  | -0.82 | -0.30 | -0.56 | -0.51 | -0.72 | 0.2547 | 0.6425 | 0.4801 | 0.0573 | 0.0065 |
| 235043 | Tnem205  | 0.04  | -0.53 | -0.63 | -0.41 | -0.58 | 0.6530 | 0.0160 | 0.0039 | 0.0062 | 0.0001 |
| 66950  | Tnem206  | -0.07 | -0.45 | -1.02 | -0.94 | -1.08 | 0.5926 | 0.0211 | 0.0003 | 0.0001 | 0.0000 |
| 66950  | Tnem206  | -0.18 | -0.30 | -0.10 | 0.05  | 0.03  | 0.6130 | 0.6109 | 0.4788 | 0.4910 | 0.4443 |
| 224058 | Tnem207  | -0.06 | 0.03  | 0.15  | 0.18  | -0.02 | 0.5278 | 0.6315 | 0.2564 | 0.2730 | 0.4266 |
| 66320  | Tnem208  | -1.34 | 0.09  | -0.53 | -0.87 | -1.45 | 0.3003 | 0.3866 | 0.5883 | 0.0041 | 0.0000 |
| 72649  | Tnem209  | -0.17 | -0.21 | -0.17 | -0.08 | -0.11 | 0.5126 | 0.6204 | 0.6397 | 0.2817 | 0.1716 |
| 72649  | Tnem209  | -0.06 | 0.09  | -0.02 | -0.07 | -0.11 | 0.5416 | 0.4866 | 0.4964 | 0.3387 | 0.1413 |
| 72649  | Tnem209  | -0.05 | 0.11  | -0.03 | -0.01 | -0.09 | 0.5789 | 0.5912 | 0.5791 | 0.5422 | 0.1571 |
| 72649  | Tnem209  | -0.03 | 0.11  | 0.18  | 0.23  | 0.43  | 0.6720 | 0.3025 | 0.1725 | 0.0403 | 0.0024 |
| 71764  | Tnem24   | -0.02 | -0.04 | -0.06 | -0.04 | 0.03  | 0.6748 | 0.6336 | 0.5934 | 0.4366 | 0.3950 |
| 71764  | Tnem24   | 0.00  | -0.04 | -0.09 | -0.13 | -0.14 | 0.6964 | 0.3449 | 0.2773 | 0.2329 | 0.0352 |
| 327766 | Tnem26   | 0.01  | 0.02  | 0.23  | 0.04  | -0.07 | 0.6018 | 0.5201 | 0.0562 | 0.4534 | 0.3950 |
| 57394  | Tnem27   | -0.05 | 0.05  | 0.01  | -0.04 | -0.03 | 0.6018 | 0.6529 | 0.5534 | 0.3927 | 0.1452 |
| 270028 | Tnem28   | -0.04 | -0.02 | -0.02 | -0.05 | -0.04 | 0.6124 | 0.6233 | 0.5332 | 0.3927 | 0.2680 |
| 362245 | Tnem29   | -0.27 | -0.41 | -0.56 | -0.45 | -0.78 | 0.1724 | 0.0280 | 0.1600 | 0.0960 | 0.0885 |
| 69981  | Tnem30a  | 0.30  | -0.36 | -0.21 | -0.36 | -0.19 | 0.3186 | 0.6362 | 0.3835 | 0.2070 | 0.1510 |
| 69981  | Tnem30a  | -0.45 | -0.06 | 0.29  | -0.48 | -0.45 | 0.0620 | 0.6029 | 0.4752 | 0.0367 | 0.0013 |
| 238257 | Tnem30b  | 0.87  | 0.20  | -0.03 | 0.45  | 0.95  | 0.5923 | 0.5889 | 0.6196 | 0.1132 | 0.2531 |
| 238257 | Tnem30b  | 0.06  | 0.04  | 0.10  | 0.15  | 0.06  | 0.3732 | 0.6439 | 0.5835 | 0.1013 | 0.1321 |
| 71027  | Tnem30c  | -0.12 | 0.01  | 0.09  | -0.15 | -0.12 | 0.4708 | 0.1227 | 0.3274 | 0.3023 | 0.0501 |
| 71027  | Tnem30c  | 0.07  | 0.20  | 0.09  | 0.07  | 0.19  | 0.4149 | 0.0531 | 0.6330 | 0.1231 | 0.0335 |
| 236792 | Tnem32   | -0.54 | -0.11 | -0.12 | 0.26  | 0.38  | 0.4482 | 0.6398 | 0.4570 | 0.5344 | 0.2379 |
| 236792 | Tnem32   | 0.12  | 0.11  | 0.01  | -0.01 | 0.08  | 0.2076 | 0.0729 | 0.1832 | 0.3772 | 0.0319 |
| 67878  | Tnem33   | 0.68  | -0.57 | -0.39 | 0.17  | 0.55  | 0.4577 | 0.4784 | 0.6295 | 0.4678 | 0.1375 |
| 67878  | Tnem33   | 0.28  | 0.39  | 0.20  | 0.06  | 0.22  | 0.6340 | 0.3971 | 0.4260 | 0.3186 | 0.4725 |
| 234463 | Tnem34   | 0.03  | 0.05  | 0.04  | 0.06  | -0.01 | 0.5951 | 0.3261 | 0.5310 | 0.1522 | 0.3533 |
| 67564  | Tnem35   | -0.20 | -0.84 | -0.53 | -0.35 | -0.13 | 0.6177 | 0.2272 | 0.5253 | 0.4506 | 0.2425 |
| 170706 | Tnem37   | -1.10 | 0.41  | 0.82  | 0.26  | 0.70  | 0.3327 | 0.2533 | 0.1112 | 0.2334 | 0.0107 |
| 170706 | Tnem37   | 0.09  | 0.05  | 0.68  | 0.62  | 1.05  | 0.6486 | 0.5540 | 0.1974 | 0.1228 | 0.0028 |
| 74166  | Tnem38a  | -0.07 | -0.35 | 0.08  | 0.24  | -0.18 | 0.2132 | 0.6147 | 0.3546 | 0.3392 | 0.2475 |
| 74166  | Tnem38a  | -0.94 | -0.16 | -0.06 | 0.08  | -0.50 | 0.3337 | 0.4917 | 0.4406 | 0.5097 | 0.0161 |
| 52076  | Tnem38b  | 0.59  | 0.34  | 0.18  | 0.49  | 0.83  | 0.0853 | 0.2611 | 0.5357 | 0.0040 | 0.0009 |





|        |        |       |       |       |       |       |        |        |        |        |        |                                                           |
|--------|--------|-------|-------|-------|-------|-------|--------|--------|--------|--------|--------|-----------------------------------------------------------|
| 21848  | Trim24 | 0.00  | -0.01 | 0.00  | -0.07 | -0.06 | 0.6979 | 0.4713 | 0.4844 | 0.3260 | 0.2798 | tripartite mol%-containing 24                             |
| 217069 | Trim25 | -0.78 | 0.63  | 0.76  | 0.34  | 0.03  | 0.4365 | 0.1725 | 0.1205 | 0.0559 | 0.4444 | tripartite mol%-containing 25                             |
| 217069 | Trim25 | -0.08 | -0.51 | -0.99 | -0.53 | -0.70 | 0.6268 | 0.0590 | 0.0020 | 0.0405 | 0.0007 | tripartite mol%-containing 25                             |
| 22670  | Trim26 | 0.67  | 0.12  | 0.42  | 0.69  | 1.06  | 0.1968 | 0.0636 | 0.3686 | 0.0050 | 0.0000 | tripartite mol%-containing 26                             |
| 22670  | Trim26 | 0.08  | -0.44 | -0.04 | 0.27  | 0.41  | 0.6113 | 0.1416 | 0.5336 | 0.1971 | 0.0136 | tripartite mol%-containing 26                             |
| 22670  | Trim26 | 0.08  | 1.05  | 0.71  | 0.03  | 0.26  | 0.6375 | 0.0267 | 0.0924 | 0.5214 | 0.0811 | tripartite mol%-containing 26                             |
| 19720  | Trim27 | 0.20  | -0.05 | 0.09  | 0.12  | 0.09  | 0.4311 | 0.1399 | 0.4142 | 0.4228 | 0.2382 | tripartite mol%-containing 27                             |
| 19720  | Trim27 | 0.13  | 2.53  | 2.48  | 2.49  | 2.82  | 0.6530 | 0.0160 | 0.1144 | 0.0000 | 0.0000 | tripartite mol%-containing 27                             |
| 21849  | Trim28 | -0.90 | 0.03  | 0.38  | 0.20  | 0.04  | 0.4249 | 0.3995 | 0.2445 | 0.1766 | 0.4422 | tripartite mol%-containing 28                             |
| 72169  | Trim29 | 0.06  | 0.25  | 0.24  | 0.58  | 0.53  | 0.6587 | 0.5983 | 0.5753 | 0.1105 | 0.0045 | tripartite mol%-containing 29                             |
| 55992  | Trim3  | -0.34 | 0.47  | 0.86  | 0.48  | 0.59  | 0.1132 | 0.1008 | 0.0085 | 0.0085 | 0.0001 | tripartite mol%-containing 3                              |
| 55992  | Trim3  | 0.01  | 0.47  | 0.58  | 0.23  | 0.71  | 0.1132 | 0.1008 | 0.0085 | 0.0085 | 0.0001 | tripartite mol%-containing 3                              |
| 20128  | Trim30 | -0.32 | -0.47 | -0.75 | -0.80 | -1.09 | 0.3781 | 0.0873 | 0.0083 | 0.0004 | 0.0000 | tripartite mol%-containing 30                             |
| 20128  | Trim30 | -0.07 | -0.34 | -0.97 | -0.90 | -1.04 | 0.6624 | 0.1905 | 0.0132 | 0.0034 | 0.0001 | tripartite mol%-containing 30                             |
| 224762 | Trim31 | -0.01 | 0.05  | 0.01  | -0.02 | 0.00  | 0.6650 | 0.5690 | 0.6335 | 0.5124 | 0.4875 | tripartite mol%-containing 31                             |
| 69807  | Trim32 | 0.48  | -1.21 | -0.88 | -0.30 | -0.43 | 0.1962 | 0.0015 | 0.0021 | 0.1645 | 0.0180 | tripartite mol%-containing 32                             |
| 94093  | Trim33 | 0.07  | 0.02  | -0.08 | 0.03  | -0.08 | 0.4786 | 0.6365 | 0.3251 | 0.5016 | 0.2293 | tripartite mol%-containing 33                             |
| 94093  | Trim33 | 0.17  | -0.37 | -0.09 | -0.04 | 0.30  | 0.4133 | 0.0629 | 0.3694 | 0.5052 | 0.0173 | tripartite mol%-containing 33                             |
| 94094  | Trim34 | 0.59  | -1.34 | -1.53 | -0.30 | -0.67 | 0.2679 | 0.1008 | 0.0017 | 0.2939 | 0.0129 | tripartite mol%-containing 34                             |
| 94094  | Trim34 | -0.29 | -0.06 | -0.38 | -0.46 | -0.66 | 0.3945 | 0.5713 | 0.3305 | 0.0328 | 0.0007 | tripartite mol%-containing 34                             |
| 94094  | Trim34 | 0.09  | -0.54 | -0.64 | -0.15 | -0.26 | 0.6379 | 0.3845 | 0.2203 | 0.2728 | 0.0643 | tripartite mol%-containing 34                             |
| 66854  | Trim35 | -0.82 | 1.24  | 0.19  | -1.24 | -1.32 | 0.3734 | 0.2130 | 0.6326 | 0.0208 | 0.0070 | tripartite mol%-containing 35                             |
| 66854  | Trim35 | -0.15 | -0.34 | -0.04 | -0.23 | -0.33 | 0.4914 | 0.1919 | 0.6432 | 0.1837 | 0.0550 | tripartite mol%-containing 35                             |
| 66854  | Trim35 | 0.22  | 0.37  | 0.17  | 0.25  | 0.22  | 0.5030 | 0.4678 | 0.6403 | 0.0600 | 0.0719 | tripartite mol%-containing 35                             |
| 28105  | Trim36 | 0.28  | -0.25 | -0.83 | -0.14 | -0.06 | 0.2821 | 0.0875 | 0.0974 | 0.1864 | 0.3340 | tripartite mol%-containing 36                             |
| 68729  | Trim37 | 0.40  | -0.77 | -0.24 | -0.46 | -0.69 | 0.1640 | 0.0043 | 0.0028 | 0.0044 | 0.0000 | tripartite mol%-containing 37                             |
| 68729  | Trim37 | 0.28  | -0.14 | -0.05 | 0.03  | -0.05 | 0.4188 | 0.2327 | 0.5779 | 0.4547 | 0.3183 | tripartite mol%-containing 37                             |
| 79263  | Trim38 | 0.19  | 0.15  | 0.21  | -0.89 | -1.82 | 0.5724 | 0.5727 | 0.0503 | 0.0013 | 0.0000 | tripartite mol%-containing 37                             |
| 79263  | Trim38 | 0.23  | -0.32 | -0.56 | -0.23 | -0.31 | 0.4618 | 0.6417 | 0.5560 | 0.1462 | 0.0063 | tripartite mol%-containing 39                             |
| 79263  | Trim39 | -0.20 | 0.45  | 0.16  | -0.21 | -0.33 | 0.4791 | 0.3538 | 0.6253 | 0.0628 | 0.0000 | tripartite mol%-containing 39                             |
| 79263  | Trim39 | 0.01  | 0.01  | 0.54  | -0.04 | 0.14  | 0.4797 | 0.1234 | 0.0407 | 0.1734 | 0.1511 | tripartite mol%-containing 39                             |
| 211007 | Trim41 | -0.30 | 0.50  | 0.50  | -0.11 | -0.04 | 0.6893 | 0.5970 | 0.3775 | 0.4071 | 0.1012 | tripartite mol%-containing 41                             |
| 211007 | Trim41 | -0.03 | -0.82 | -0.69 | -0.73 | -0.60 | 0.4247 | 0.2342 | 0.1177 | 0.3497 | 0.0043 | tripartite mol%-containing 41                             |
| 78911  | Trim42 | -0.03 | 0.01  | 0.10  | -0.02 | 0.06  | 0.6747 | 0.0080 | 0.0039 | 0.0033 | 0.0069 | tripartite mol%-containing 42                             |
| 80885  | Trim44 | 0.62  | -0.47 | 0.06  | 0.53  | 0.75  | 0.6294 | 0.6033 | 0.2699 | 0.5090 | 0.2557 | tripartite mol%-containing 42                             |
| 80885  | Trim44 | -0.11 | -0.06 | 0.12  | -0.06 | 0.05  | 0.1271 | 0.5658 | 0.0471 | 0.0069 | 0.0069 | tripartite mol%-containing 44                             |
| 229644 | Trim45 | 0.09  | -0.09 | -0.07 | 0.03  | -0.01 | 0.5580 | 0.6182 | 0.3080 | 0.4323 | 0.3711 | tripartite mol%-containing 44                             |
| 229644 | Trim45 | 0.08  | -0.33 | -0.71 | -0.42 | -0.60 | 0.4657 | 0.3872 | 0.3587 | 0.4953 | 0.4661 | tripartite mol%-containing 45                             |
| 360213 | Trim46 | 0.24  | -0.09 | 0.09  | 0.05  | -0.09 | 0.5221 | 0.0367 | 0.0007 | 0.0006 | 0.0002 | tripartite mol%-containing 45                             |
| 217333 | Trim47 | -0.02 | -0.98 | -0.61 | -0.41 | -0.66 | 0.4732 | 0.3101 | 0.5362 | 0.4533 | 0.2004 | tripartite mol%-containing 46                             |
| 215061 | Trim50 | 0.00  | -0.04 | 0.01  | 0.01  | -0.03 | 0.6926 | 0.0680 | 0.2914 | 0.0015 | 0.0004 | tripartite mol%-containing 47                             |
| 215061 | Trim50 | 0.10  | -0.01 | -0.02 | 0.10  | 0.01  | 0.7000 | 0.6307 | 0.4783 | 0.5320 | 0.3937 | tripartite mol%-containing 50                             |
| 212085 | Trim52 | 0.05  | -0.08 | -0.10 | -0.08 | -0.02 | 0.5831 | 0.3845 | 0.6457 | 0.2141 | 0.4763 | tripartite mol%-containing 52                             |
| 58522  | Trim54 | -0.38 | 0.44  | 0.66  | 0.32  | 0.24  | 0.4295 | 0.4882 | 0.2279 | 0.4129 | 0.3525 | tripartite mol%-containing 54                             |
| 381485 | Trim55 | -1.46 | 4.52  | 2.76  | -1.69 | -1.91 | 0.4160 | 0.0106 | 0.1110 | 0.1878 | 0.0924 | tripartite mol%-containing 55                             |
| 384309 | Trim56 | -0.02 | -0.33 | -0.53 | 0.07  | -0.07 | 0.6881 | 0.2911 | 0.0834 | 0.4627 | 0.3781 | tripartite mol%-containing 56                             |
| 66949  | Trim59 | 0.06  | -0.30 | 0.12  | -0.09 | -0.03 | 0.5257 | 0.0945 | 0.3662 | 0.2394 | 0.3965 | tripartite mol%-containing 59                             |
| 66949  | Trim59 | -0.09 | -0.03 | 0.04  | -0.26 | -0.12 | 0.5604 | 0.6446 | 0.5031 | 0.0846 | 0.2342 | tripartite mol%-containing 59                             |
| 94088  | Trim6  | 0.16  | 0.04  | 0.09  | 0.13  | 0.27  | 0.2301 | 0.4418 | 0.5385 | 0.2858 | 0.1975 | tripartite mol%-containing 6                              |
| 94088  | Trim6  | -0.17 | 0.34  | 0.66  | 0.67  | 0.56  | 0.2974 | 0.0516 | 0.5052 | 0.1461 | 0.0196 | tripartite mol%-containing 6                              |
| 94088  | Trim6  | 0.04  | 0.07  | 0.11  | 0.12  | 0.20  | 0.4146 | 0.0431 | 0.0012 | 0.0010 | 0.0048 | tripartite mol%-containing 6                              |
| 94088  | Trim6  | -0.04 | 0.18  | 0.19  | -0.12 | -0.12 | 0.5742 | 0.3191 | 0.2574 | 0.1275 | 0.0133 | tripartite mol%-containing 6                              |
| 234329 | Trim60 | 0.05  | -0.11 | -0.02 | 0.06  | -0.02 | 0.6724 | 0.6359 | 0.6371 | 0.1876 | 0.1389 | tripartite mol%-containing 6                              |
| 260296 | Trim61 | 0.06  | -0.06 | 0.09  | 0.06  | -0.01 | 0.5416 | 0.2784 | 0.5537 | 0.3083 | 0.4187 | tripartite mol%-containing 60                             |
| 67525  | Trim62 | -0.05 | 0.04  | 0.03  | 0.04  | 0.03  | 0.5118 | 0.3245 | 0.5283 | 0.3396 | 0.4569 | tripartite mol%-containing 61                             |
| 67525  | Trim62 | 0.14  | -0.37 | -0.11 | -0.03 | -0.06 | 0.5078 | 0.4139 | 0.4685 | 0.5471 | 0.3668 | tripartite mol%-containing 62                             |
| 433766 | Trim63 | -0.03 | -0.08 | 0.24  | 0.41  | 0.01  | 0.5195 | 0.0580 | 0.3137 | 0.5095 | 0.2744 | tripartite mol%-containing 62                             |
| 433766 | Trim63 | 0.00  | 0.03  | 0.03  | 0.06  | -0.01 | 0.2624 | 0.3378 | 0.4627 | 0.3319 | 0.3983 | tripartite mol%-containing 63                             |
| 338364 | Trim65 | 0.39  | -0.66 | -0.71 | -0.44 | -0.47 | 0.6951 | 0.5930 | 0.6026 | 0.4027 | 0.4489 | tripartite mol%-containing 63                             |
| 338364 | Trim65 | 0.09  | -0.20 | -0.14 | -0.11 | -0.08 | 0.3026 | 0.0240 | 0.1045 | 0.0209 | 0.0023 | tripartite mol%-containing 65                             |
| 330627 | Trim66 | 0.10  | -0.06 | 0.03  | 0.19  | 0.07  | 0.3754 | 0.0744 | 0.1045 | 0.2165 | 0.1475 | tripartite mol%-containing 65                             |
| 330627 | Trim66 | 0.06  | -0.06 | -0.16 | -0.04 | 0.09  | 0.5019 | 0.3223 | 0.5237 | 0.1285 | 0.2523 | tripartite mol%-containing 66                             |
| 330627 | Trim66 | 0.00  | -0.04 | -0.06 | -0.13 | 0.04  | 0.5575 | 0.5639 | 0.2700 | 0.3755 | 0.2131 | tripartite mol%-containing 66                             |
| 330627 | Trim67 | 0.23  | -0.03 | 0.02  | 0.17  | 0.18  | 0.6961 | 0.6246 | 0.5139 | 0.3743 | 0.3898 | tripartite mol%-containing 66                             |
| 330633 | Trim67 | 0.04  | 0.04  | 0.11  | 0.09  | 0.05  | 0.1411 | 0.6290 | 0.5329 | 0.0787 | 0.0691 | tripartite mol%-containing 67                             |
| 330633 | Trim67 | 0.11  | 0.19  | 0.04  | 0.05  | -0.08 | 0.5822 | 0.6477 | 0.4672 | 0.4100 | 0.2450 | tripartite mol%-containing 67                             |
| 101700 | Trim68 | -0.29 | -0.49 | -0.58 | -0.13 | -0.52 | 0.5830 | 0.6537 | 0.6055 | 0.3637 | 0.0227 | tripartite mol%-containing 68                             |
| 70928  | Trim69 | 0.02  | -0.11 | -0.32 | -0.22 | -0.25 | 0.6752 | 0.2599 | 0.0542 | 0.0586 | 0.0158 | tripartite mol%-containing 69                             |
| 94089  | Trim7  | 0.09  | 0.09  | -0.07 | 0.01  | 0.01  | 0.5498 | 0.6228 | 0.3016 | 0.5152 | 0.4714 | tripartite mol%-containing 7                              |
| 94089  | Trim7  | -0.06 | 0.05  | 0.05  | 0.14  | -0.02 | 0.5797 | 0.3519 | 0.4138 | 0.0820 | 0.4238 | tripartite mol%-containing 7                              |
| 94090  | Trim9  | -0.13 | 0.13  | 0.06  | -0.06 | -0.10 | 0.3741 | 0.4111 | 0.6171 | 0.3713 | 0.1302 | tripartite mol%-containing 9                              |
| 94090  | Trim9  | 0.04  | 0.04  | 0.11  | 0.09  | 0.05  | 0.5737 | 0.4826 | 0.2396 | 0.2724 | 0.3161 | tripartite mol%-containing 9                              |
| 94090  | Trim9  | -0.05 | -0.02 | 0.01  | -0.13 | -0.04 | 0.6163 | 0.5225 | 0.5932 | 0.2545 | 0.4215 | tripartite mol%-containing 9                              |
| 94090  | Trim9  | 0.03  | -0.17 | -0.03 | -0.05 | -0.05 | 0.6315 | 0.2835 | 0.6415 | 0.3765 | 0.3034 | tripartite mol%-containing 9                              |
| 12751  | Trp1   | 0.44  | -0.62 | -0.08 | 0.01  | 0.28  | 0.3244 | 0.1172 | 0.5903 | 0.1874 | 0.0813 | tripeptidyl peptidase I                                   |
| 12751  | Trp1   | 0.10  | -0.07 | 0.06  | -0.17 | 0.11  | 0.5476 | 0.3715 | 0.5903 | 0.1874 | 0.0813 | tripeptidyl peptidase I                                   |
| 22019  | Trp2   | -0.25 | -0.13 | 0.42  | 0.44  | 0.64  | 0.5924 | 0.4824 | 0.3481 | 0.3539 | 0.0019 | tripeptidyl peptidase II                                  |
| 22019  | Trp2   | -0.03 | -0.09 | -0.01 | -0.06 | -0.10 | 0.6452 | 0.5048 | 0.6537 | 0.0089 | 0.0003 | tripeptidyl peptidase II                                  |
| 22019  | Trp2   | -0.11 | -0.09 | 0.73  | 0.61  | 1.00  | 0.6537 | 0.5048 | 0.6537 | 0.0089 | 0.0003 | tripeptidyl peptidase II                                  |
| 223435 | Trp    | 0.18  | -0.30 | -0.08 | 0.08  | -0.03 | 0.4671 | 0.0875 | 0.3300 | 0.3892 | 0.4344 | triple functional domain (PTPRF interacting)              |
| 223435 | Trp    | -0.02 | -0.07 | -0.02 | 0.00  | -0.02 | 0.6473 | 0.4005 | 0.5814 | 0.5613 | 0.4344 | triple functional domain (PTPRF interacting)              |
| 21787  | Tlg    | 0.04  | -0.03 | 0.38  | -0.21 | 0.05  | 0.6664 | 0.1688 | 0.6123 | 0.5578 | 0.1288 | Trk-fused gene                                            |
| 21787  | Tlg    | -0.03 | -0.26 | 0.38  | -0.21 | 0.05  | 0.6664 | 0.1688 | 0.6123 | 0.5578 | 0.1288 | Trk-fused gene                                            |
| 212528 | Trmt1  | 0.22  | 0.10  | 0.44  | 0.21  | 0.60  | 0.3041 | 0.6528 | 0.2279 | 0.0033 | 0.0000 | TRM1 RNA methyltransferase 1 homolog (S. cerevisiae)      |
| 212528 | Trmt1  | -0.06 | 0.45  | 0.04  | 0.34  | 0.21  | 0.6334 | 0.2355 | 0.2232 | 0.0399 | 0.0516 | TRM1 RNA methyltransferase 1 homolog (S. cerevisiae)      |
| 76357  | Trmt5  | -0.14 | -0.20 | -0.16 | -0.02 | 0.14  | 0.5949 | 0.6091 | 0.5629 | 0.5294 | 0.4538 | TRM5 RNA methyltransferase 5 homolog (S. cerevisiae)      |
| 76357  | Trmt5  | 0.01  | -0.01 | 0.09  | 0.07  | 0.14  | 0.6650 | 0.6289 | 0.3213 | 0.2613 | 0.0608 | TRM5 RNA methyltransferase 5 homolog (S. cerevisiae)      |
| 72026  | Trnu   | -0.17 | 0.12  | 0.02  | -0.18 | -0.36 | 0.4993 | 0.6206 | 0.4542 | 0.1229 | 0.0163 | RNA 5-methylaminomethyl-2-thiouridylate methyltransferase |
| 72026  | Trnu   | 0.05  | 0.35  | 0.06  | 0.16  | 0.16  | 0.5416 | 0.0383 | 0.4296 | 0.0543 | 0.0345 | RNA 5-methylaminomethyl-2-thiouridylate methyltransferase |
| 72026  | Trnu   | 0.02  | -0.03 | -0.03 |       |       |        |        |        |        |        |                                                           |





























































|          |          |       |       |       |       |       |        |        |        |        |                                                                  |
|----------|----------|-------|-------|-------|-------|-------|--------|--------|--------|--------|------------------------------------------------------------------|
| 56364    | Znym3    | -0.19 | 0.25  | -0.15 | -0.33 | -0.23 | 0.4933 | 0.5183 | 0.3266 | 0.0718 | 0.0781 zinc finger, MYM-type 3                                   |
| 67785    | Znym4    | -0.20 | 0.01  | 0.02  | -0.08 | -0.10 | 0.2300 | 0.5895 | 0.6300 | 0.3129 | 0.1806 zinc finger, MYM-type 4                                   |
| 67785    | Znym4    | 0.15  | 0.16  | 0.07  | 0.12  | 0.08  | 0.3721 | 0.4162 | 0.6346 | 0.1703 | 0.1611 zinc finger, MYM-type 4                                   |
| 67785    | Znym4    | -0.13 | -0.11 | -0.14 | -0.06 | -0.04 | 0.5793 | 0.5678 | 0.5669 | 0.4011 | 0.4016 zinc finger, MYM-type 4                                   |
| 219105   | Znym5    | -0.71 | 0.11  | 0.27  | 0.37  | 0.53  | 0.0366 | 0.6251 | 0.2264 | 0.0224 | 0.0009 zinc finger, MYM-type 5                                   |
| 219105   | Znym5    | -0.46 | -0.10 | -0.22 | -0.49 | -0.40 | 0.4428 | 0.5281 | 0.5878 | 0.0472 | 0.0444 zinc finger, MYM-type 5                                   |
| 219105   | Znym5    | -0.21 | 0.14  | 0.20  | -0.48 | -0.10 | 0.4853 | 0.6359 | 0.5625 | 0.0065 | 0.3013 zinc finger, MYM-type 5                                   |
| 219105   | Znym5    | -0.03 | -0.01 | -0.05 | -0.02 | 0.06  | 0.6755 | 0.5146 | 0.4277 | 0.5347 | 0.4215 zinc finger, MYM-type 5                                   |
| 100177   | Znym6    | 0.45  | -0.74 | -1.05 | -0.37 | -0.48 | 0.1939 | 0.0083 | 0.0026 | 0.2461 | 0.0016 zinc finger, MYM-type 6                                   |
| 100177   | Znym6    | 0.40  | -0.54 | -0.80 | -0.19 | -0.48 | 0.5085 | 0.0496 | 0.0034 | 0.0754 | 0.2501 zinc finger, MYM-type 6                                   |
| 100177   | Znym6    | 0.00  | 0.09  | 0.08  | -0.03 | 0.02  | 0.7009 | 0.4354 | 0.4300 | 0.4758 | 0.4533 zinc finger, MYM-type 6                                   |
| 114602   | Znymd10  | 0.13  | -0.23 | -0.93 | -0.77 | -1.30 | 0.4767 | 0.1425 | 0.0007 | 0.0002 | 0.0000 zinc finger, MYND domain containing 10                    |
| 66505    | Znymd11  | 0.46  | 0.14  | -0.02 | 0.28  | 0.37  | 0.2530 | 0.5882 | 0.5694 | 0.1360 | 0.0293 zinc finger, MYND domain containing 11                    |
| 332934   | Znymd12  | 0.31  | -0.45 | -0.51 | -0.14 | -0.31 | 0.2502 | 0.0213 | 0.0060 | 0.2069 | 0.0094 zinc finger, MYND domain containing 12                    |
| 332934   | Znymd12  | 0.15  | -0.20 | -0.19 | -0.12 | -0.23 | 0.4966 | 0.1851 | 0.1150 | 0.2223 | 0.0484 zinc finger, MYND domain containing 12                    |
| 332934   | Znymd12  | 0.10  | -0.20 | -0.26 | -0.14 | -0.20 | 0.5110 | 0.0685 | 0.0773 | 0.2011 | 0.0617 zinc finger, MYND domain containing 12                    |
| 74843    | Znymd17  | 0.11  | 0.22  | 0.52  | 0.19  | 0.35  | 0.6377 | 0.2342 | 0.0832 | 0.1356 | 0.0132 zinc finger, MYND domain containing 17                    |
| 67187    | Znymd19  | 0.26  | -0.35 | -0.21 | -0.10 | -0.03 | 0.2292 | 0.0180 | 0.0519 | 0.3248 | 0.4428 zinc finger, MYND domain containing 19                    |
| 574428   | Znymd15  | -0.70 | 0.34  | 0.75  | 0.06  | 0.22  | 0.1370 | 0.4890 | 0.1317 | 0.4792 | 0.0947 zinc finger, MYND-type containing 15                      |
| 98999    | Znfx1    | -0.20 | -0.47 | 0.09  | 0.66  | 0.73  | 0.6444 | 0.6096 | 0.3719 | 0.0258 | 0.0126 zinc finger, NFX1-type containing 1                       |
| 360216   | Zranb1   | -0.58 | 0.24  | 0.32  | 0.38  | 0.18  | 0.2151 | 0.4951 | 0.6375 | 0.0940 | 0.1711 zinc finger, RAN-binding domain containing 1              |
| 53861    | Zranb2   | -0.34 | 0.92  | 0.21  | -0.88 | -1.16 | 0.5330 | 0.3208 | 0.6220 | 0.0243 | 0.0020 zinc finger, RAN-binding domain containing 2              |
| 226409   | Zranb3   | -0.31 | 0.06  | -0.27 | -0.55 | -0.93 | 0.3015 | 0.6539 | 0.2059 | 0.0106 | 0.0001 zinc finger, RAN-binding domain containing 3              |
| 226409   | Zranb3   | 0.05  | -0.11 | -0.11 | -0.03 | -0.00 | 0.5570 | 0.2530 | 0.2680 | 0.4382 | 0.4826 zinc finger, RAN-binding domain containing 3              |
| 71971    | Zswim1   | -0.22 | 0.32  | 0.27  | -0.28 | -0.16 | 0.4444 | 0.4703 | 0.4903 | 0.0650 | 0.1602 zinc finger, SWIM domain containing 1                     |
| 71981    | Zswim2   | 0.06  | -0.01 | 0.00  | 0.00  | 0.05  | 0.5215 | 0.5442 | 0.5785 | 0.5492 | 0.2847 zinc finger, SWIM domain containing 2                     |
| 67538    | Zswim3   | -0.22 | -1.15 | -1.21 | -1.05 | -1.20 | 0.4398 | 0.0013 | 0.0006 | 0.0001 | 0.0000 zinc finger, SWIM domain containing 3                     |
| 212168   | Zswim4   | -0.07 | 0.13  | 0.18  | -0.03 | 0.05  | 0.5128 | 0.3319 | 0.1659 | 0.4906 | 0.2961 zinc finger, SWIM domain containing 4                     |
| 212168   | Zswim4   | 0.00  | 0.37  | 0.41  | -0.09 | -0.04 | 0.7015 | 0.3793 | 0.3300 | 0.3226 | 0.3934 zinc finger, SWIM domain containing 4                     |
| 74464    | Zswim5   | 0.15  | -0.02 | 0.12  | 0.11  | 0.11  | 0.3548 | 0.6040 | 0.4237 | 0.1650 | 0.1279 zinc finger, SWIM domain containing 5                     |
| 74464    | Zswim5   | -0.10 | 0.00  | 0.04  | -0.10 | -0.01 | 0.4085 | 0.6326 | 0.5134 | 0.2220 | 0.1642 zinc finger, SWIM domain containing 5                     |
| 74464    | Zswim5   | 0.01  | 0.01  | 0.01  | 0.03  | 0.07  | 0.6675 | 0.6111 | 0.5949 | 0.4438 | 0.2279 zinc finger, SWIM domain containing 5                     |
| 74464    | Zswim5   | 0.05  | -0.69 | -0.33 | -0.18 | 0.02  | 0.2674 | 0.0196 | 0.1089 | 0.3563 | 0.4746 zinc finger, SWIM domain containing 6                     |
| 67263    | Zswim6   | -0.65 | 0.10  | 0.25  | -0.33 | -0.13 | 0.3268 | 0.3433 | 0.2285 | 0.1529 | 0.3322 zinc finger, SWIM domain containing 6                     |
| 67263    | Zswim6   | 0.05  | 0.15  | 0.22  | -0.04 | 0.01  | 0.6374 | 0.6417 | 0.5362 | 0.4949 | 0.4609 zinc finger, SWIM domain containing 6                     |
| 688171   | Xda      | 0.19  | -0.33 | 0.02  | 0.32  | 0.44  | 0.3136 | 0.2553 | 0.5990 | 0.0164 | 0.0019 zinc finger, X-linked, duplicated A                       |
| 688166   | Zxdb     | 0.20  | 0.81  | 1.31  | 1.00  | 1.52  | 0.4809 | 0.0449 | 0.0071 | 0.0015 | 0.0000 zinc finger, X-linked, duplicated B                       |
| 108946   | Zzz3     | -0.42 | -0.12 | -0.50 | -0.14 | -0.20 | 0.5002 | 0.4876 | 0.6258 | 0.1903 | 0.1583 zinc finger, ZZ domain containing 3                       |
| 108946   | Zzz3     | -0.32 | -0.18 | 0.10  | -0.01 | 0.19  | 0.5183 | 0.5586 | 0.3393 | 0.5445 | 0.1751 zinc finger, ZZ-type with EF hand domain 1                |
| 195018   | Zze1     | -2.12 | 0.65  | 0.48  | -0.10 | 0.00  | 0.0107 | 0.3876 | 0.5089 | 0.3486 | 0.4876 zinc finger, ZZ-type with EF hand domain 1                |
| 195018   | Zze1     | -0.32 | 0.23  | 0.60  | -0.34 | 0.82  | 0.3463 | 0.1983 | 0.0378 | 0.0117 | 0.0073 zinc finger, ZZ-type with EF hand domain 1                |
| 195018   | Zze1     | -0.16 | 0.48  | 0.44  | 0.24  | 0.29  | 0.5116 | 0.0410 | 0.0442 | 0.1621 | 0.0681 zinc finger, ZZ-type with EF hand domain 1                |
| 72701    | Zp618    | -0.16 | 0.17  | 0.14  | 0.05  | -0.05 | 0.3062 | 0.1124 | 0.2443 | 0.4323 | 0.3528 zinc fingerprotein 618                                    |
| 72701    | Zp618    | 0.01  | -0.03 | -0.02 | 0.01  | -0.03 | 0.6902 | 0.6483 | 0.6057 | 0.5396 | 0.3967 zinc fingerprotein 618                                    |
| 22770    | Zhx1     | -0.25 | 0.75  | 0.22  | -0.78 | -0.59 | 0.5309 | 0.1312 | 0.5618 | 0.0394 | 0.0573 zinc fingers and homeoboxes 1                             |
| 22770    | Zhx1     | 0.06  | 0.05  | 0.01  | 0.36  | 0.40  | 0.6750 | 0.3873 | 0.3953 | 0.1187 | 0.0329 zinc fingers and homeoboxes 1                             |
| 22770    | Zhx1     | 0.01  | 0.22  | 0.05  | -0.24 | 0.12  | 0.6901 | 0.5179 | 0.5437 | 0.0157 | 0.1444 zinc fingers and homeoboxes 2                             |
| 387609   | Zhx2     | 0.31  | -0.03 | 0.01  | 0.29  | 0.12  | 0.2109 | 0.5499 | 0.5871 | 0.0560 | 0.1830 zinc fingers and homeoboxes 3                             |
| 320799   | Zhx3     | -0.58 | 0.24  | 0.73  | 0.52  | 0.82  | 0.4795 | 0.2942 | 0.1007 | 0.0145 | 0.0048 zinc fingers and homeoboxes 3                             |
| 320799   | Zhx3     | 0.19  | 0.03  | 0.88  | 0.86  | 1.24  | 0.6844 | 0.4108 | 0.0167 | 0.0002 | 0.0000 zinc fingers and homeoboxes 3                             |
| 320799   | Zhx3     | 0.01  | 0.08  | 0.20  | 0.09  | 0.03  | 0.5644 | 0.5622 | 0.3320 | 0.3320 | 0.4128 zinc fingers and homeoboxes 3                             |
| 619331   | Zp551    | -0.41 | -0.72 | -0.85 | -0.60 | -0.72 | 0.3644 | 0.2046 | 0.1089 | 0.0035 | 0.0005 zinc finger protein 551                                   |
| Zmpsie24 | Zmpsie24 | 0.33  | -0.42 | -0.07 | 0.10  | 0.28  | 0.4044 | 0.1056 | 0.4284 | 0.4379 | 0.1199 zinc metalloproteinase, STE24 homolog (S. cerevisiae)     |
| 230709   | Zmpsie24 | 0.12  | 0.32  | 0.30  | 0.07  | 0.05  | 0.5908 | 0.5271 | 0.5539 | 0.3918 | 0.3673 zinc metalloproteinase, STE24 homolog (S. cerevisiae)     |
| 66136    | Znd1     | -0.12 | -0.27 | -0.36 | -0.36 | -0.44 | 0.5385 | 0.1137 | 0.0795 | 0.0245 | 0.0007 zinc ribbon domain containing, 1                          |
| 66136    | Znd1     | 0.13  | -0.16 | -0.38 | -0.52 | -0.54 | 0.6043 | 0.3833 | 0.1391 | 0.0054 | 0.0037 zinc ribbon domain containing, 1                          |
| 22789    | Zp3r     | -0.04 | 0.05  | -0.02 | -0.14 | -0.08 | 0.6068 | 0.5550 | 0.5408 | 0.1717 | 0.2802 zona pellucida 3 receptor                                 |
| 53604    | Zp3p     | 0.10  | -0.03 | -0.09 | 0.01  | 0.01  | 0.3863 | 0.4799 | 0.3576 | 0.5395 | 0.4365 zona pellucida binding protein                            |
| 69376    | Zp3p2    | -0.13 | 0.06  | 0.07  | -0.06 | -0.04 | 0.4040 | 0.4271 | 0.3758 | 0.3856 | 0.3859 zona pellucida binding protein 2                          |
| 69376    | Zp3p2    | 0.11  | -0.01 | -0.16 | -0.02 | -0.24 | 0.5636 | 0.4407 | 0.2167 | 0.5209 | 0.0620 zona pellucida binding protein 2                          |
| 22786    | Zp1      | 0.30  | -0.16 | -0.11 | 0.07  | 0.02  | 0.3444 | 0.2119 | 0.2432 | 0.3179 | 0.4440 zona pellucida glycoprotein 1                             |
| 22787    | Zp2      | 0.03  | 0.04  | -0.01 | 0.02  | -0.01 | 0.6003 | 0.4821 | 0.6342 | 0.4636 | 0.4765 zona pellucida glycoprotein 2                             |
| 22787    | Zp2      | 0.03  | 0.05  | 0.01  | 0.10  | 0.01  | 0.6255 | 0.5120 | 0.5910 | 0.1767 | 0.4477 zona pellucida glycoprotein 2                             |
| 22788    | Zp3      | -0.10 | -0.01 | 0.08  | -0.03 | -0.08 | 0.4719 | 0.5905 | 0.4751 | 0.4828 | 0.2493 zona pellucida glycoprotein 3                             |
| 22788    | Zp3      | -0.36 | 0.69  | 0.59  | -0.03 | 0.02  | 0.5583 | 0.4767 | 0.5135 | 0.4725 | 0.4431 zona pellucida glycoprotein 3                             |
| 239852   | Zp1d1    | 0.12  | -0.06 | -0.09 | -0.01 | 0.05  | 0.3748 | 0.3876 | 0.3176 | 0.5359 | 0.3202 zona pellucida like domain containing 1                   |
| 22635    | Zan      | -0.22 | -0.15 | -0.13 | -0.35 | -0.32 | 0.1926 | 0.2908 | 0.2047 | 0.0053 | 0.0033 zonadhesin                                                |
| 22635    | Zan      | -0.03 | 0.04  | 0.03  | -0.05 | -0.01 | 0.6175 | 0.5267 | 0.5116 | 0.3600 | 0.4335 zonadhesin                                                |
| 26951    | Zw10     | 0.34  | -0.88 | -0.90 | -0.37 | -0.47 | 0.2111 | 0.0023 | 0.0038 | 0.0457 | 0.0010 ZW10 homolog (Drosophila), centromere/kinetochore protein |
| 52896    | Zwnt     | 0.15  | 0.20  | 0.19  | 0.62  | 1.22  | 0.5736 | 0.5777 | 0.0706 | 0.0599 | 0.0008 ZW10 interactor                                           |
| 52896    | Zwnt     | -0.04 | 0.94  | 1.69  | 0.80  | 1.13  | 0.6689 | 0.0224 | 0.0010 | 0.0004 | 0.0000 ZW10 interactor                                           |
| 68014    | Zw1ch    | -0.16 | -0.20 | -0.11 | -0.17 | -0.06 | 0.5025 | 0.5700 | 0.6405 | 0.1942 | 0.2976 Zw1ch, kinetochore associated, homolog (Drosophila)       |
| 80292    | Zxdc     | -0.17 | -0.14 | -0.09 | -0.01 | -0.06 | 0.4449 | 0.6085 | 0.6170 | 0.5508 | 0.3484 ZXD family zinc finger C                                  |
| 80292    | Zxdc     | 0.02  | -1.25 | -1.20 | -1.14 | -1.14 | 0.6588 | 0.0002 | 0.0000 | 0.0000 | 0.0000 ZXD family zinc finger C                                  |
| 414872   | Zygf1b   | 0.01  | 0.65  | 0.51  | 0.29  | 0.81  | 0.6903 | 0.0667 | 0.1373 | 0.0779 | 0.0001 zygf-l homolog B (C. elegans)                             |
| 317755   | Zar1     | -0.07 | -0.03 | -0.02 | -0.05 | -0.08 | 0.5926 | 0.6207 | 0.6404 | 0.4752 | 0.3110 zygotite arrest 1                                         |
| 22793    | Zyk      | 0.03  | -0.32 | 0.01  | 0.17  | 0.05  | 0.6831 | 0.3604 | 0.6209 | 0.3594 | 0.4224 zykin                                                     |
